# Supplementary material for: Comparative Transcriptome Analysis of the CO2 Sensing Pathway Via Differential Expression of Carbonic Anhydrase in Cryptococcus neoformans
Source: Oxford University Press journal article supplement (doi:10.1534/genetics.110.118315), 2010-06-03
Supplement: figures1.pdf [file figures1.pdf]

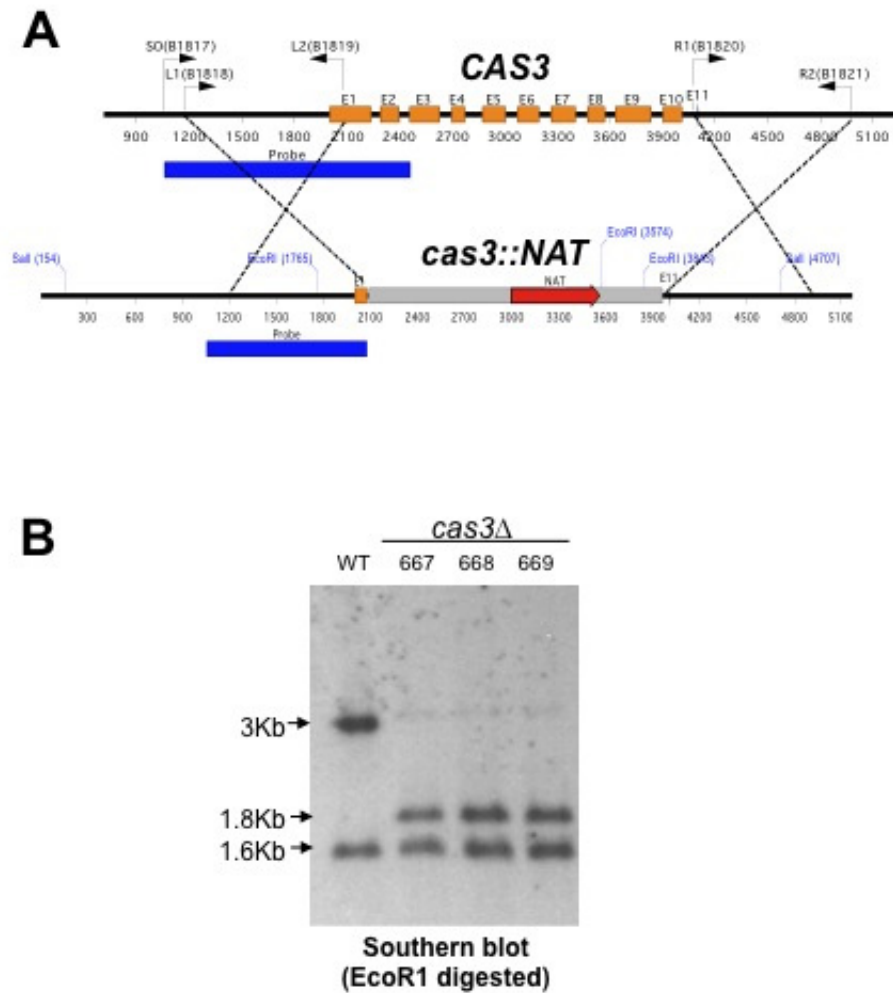

FIGURE S1.—Deletion of the *CAS3* gene. (A) The overlap PCR transformation strategy for disruption of the *CAS3* gene. Primers for overlap PCR and diagnostic PCR are indicated as bent arrows. (D) Southern hybridization was performed to verify positive *cas3Δ* mutants.
