# Supplementary material for: Comparative Transcriptome Analysis of the CO2 Sensing Pathway Via Differential Expression of Carbonic Anhydrase in Cryptococcus neoformans
Source: Oxford University Press journal article supplement (doi:10.1534/genetics.110.118315), 2010-06-03
Supplement: figures2.pdf [file figures2.pdf]

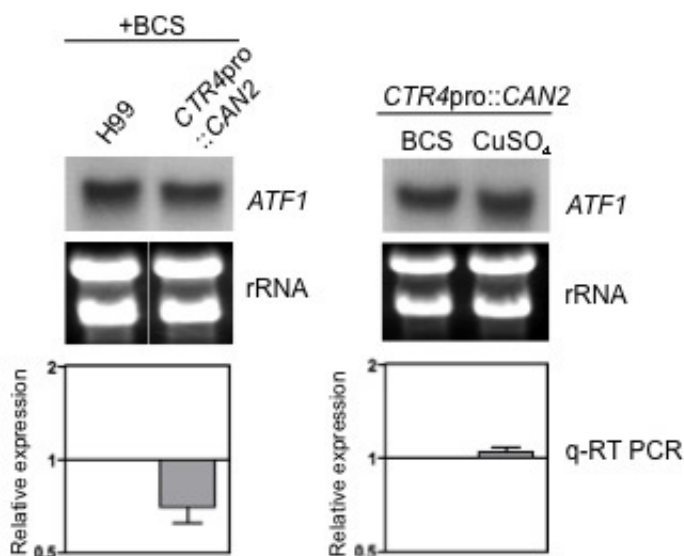

FIGURE S2.—Transcript levels of *ATF1* by overexpression or suppression of *CAN2* expression. Northern blot (top panel) and quantitative RT-PCR (qRT-PCR, bottom panel) show transcript levels of *ATF1* in the wild-type and the  $P_{CTR4}::CAN2$  strains grown in YNB+BCS medium (left panel) or the  $P_{CTR4}::CAN2$  grown in YNB+BCS and YNB+CuSO<sub>4</sub> medium. For qRT-PCR, data obtained from three independent biological replicates with three technical replicates were normalized by using *ACT1* as a control. Relative gene expression indicates normalized *ATF1* expression levels to those of the wild-type strain (left panel) or the  $P_{CTR4}::CAN2$  strain in YNB+BCS medium (right panel).
