# Supplementary material for: Comparative Transcriptome Analysis of the CO2 Sensing Pathway Via Differential Expression of Carbonic Anhydrase in Cryptococcus neoformans
Source: Oxford University Press journal article supplement (doi:10.1534/genetics.110.118315), 2010-06-03
Supplement: figures3.pdf [file figures3.pdf]

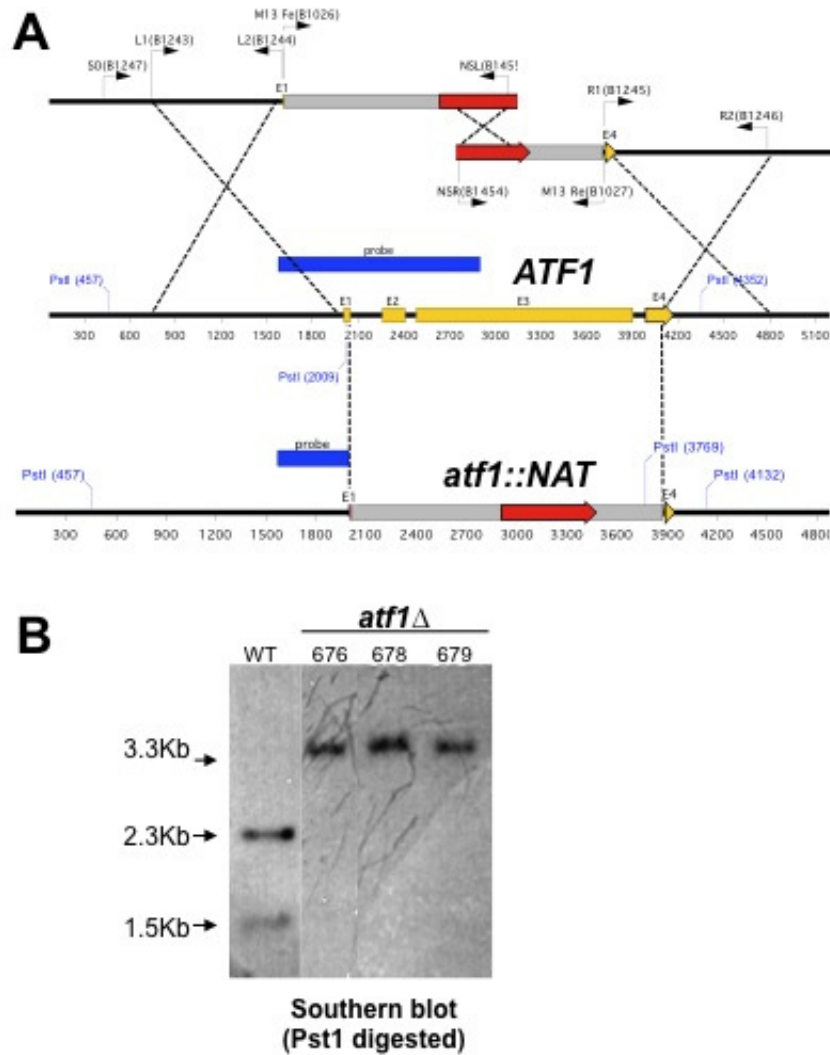

FIGURE S3.—Deletion of the *ATF1* gene. (A) The *NAT* split-marker transformation strategy for disruption of the *ATF1* gene. Primers for the double-joint PCR and diagnostic PCR are indicated as bent arrows. (D) Southern hybridization was performed to verify positive *atf1*Δ mutants.
