# Supplementary material for: Comparative Transcriptome Analysis of the CO2 Sensing Pathway Via Differential Expression of Carbonic Anhydrase in Cryptococcus neoformans
Source: Oxford University Press journal article supplement (doi:10.1534/genetics.110.118315), 2010-06-03
Supplement: figures4.pdf [file figures4.pdf]

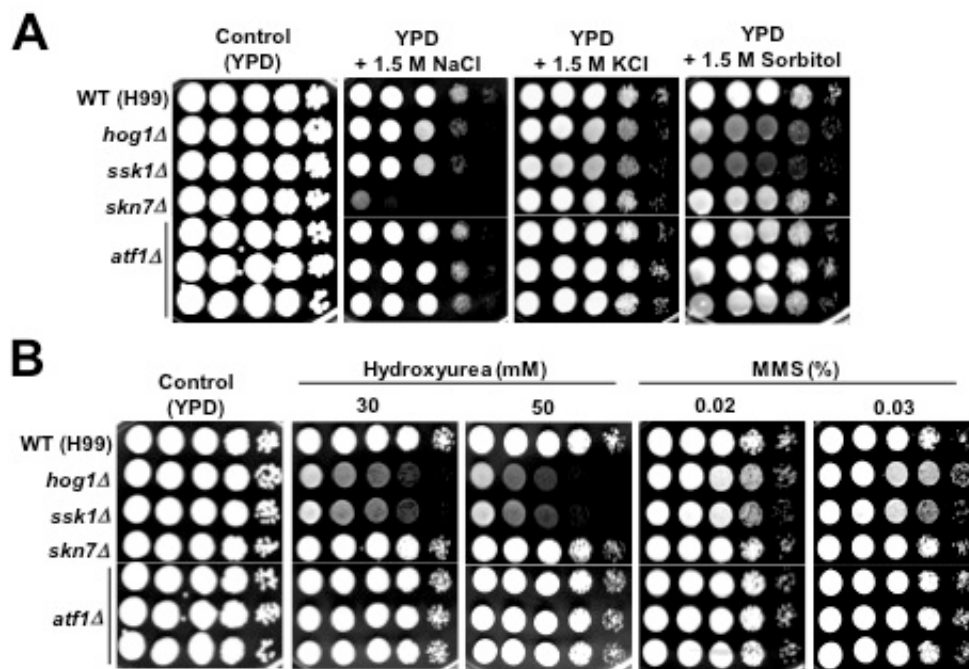

FIGURE S4.—The role of Atf1 in osmotic and genotoxic stress response. Each *C. neoformans* strain (the wild-type H99 strain and *hog1Δ* [YSB64], *ssk1Δ* [YSB261], *skn7Δ* [YSB349], *atf1Δ* [YSB676, YSB678, and YSB679] mutant strains) was grown overnight at 30°C in liquid YPD medium, 10-fold serially diluted (1–10<sup>4</sup> dilutions), and spotted (3 μl of dilution) on YPD agar containing the indicated concentrations of NaCl, KCl, sorbitol, methylmethane sulfonate (MMS), and hydroxyurea (HU). Cells were incubated at 30°C for 72 h and photographed.
