# Supplementary material for: Comparative Transcriptome Analysis of the CO2 Sensing Pathway Via Differential Expression of Carbonic Anhydrase in Cryptococcus neoformans
Source: Oxford University Press journal article supplement (doi:10.1534/genetics.110.118315), 2010-06-03
Supplement: tables1.pdf [file tables1.pdf]

TABLE S1

***C. neoformans* strains and primers used in this study**

| Strain     | Genotype                                                           | Parent     | Reference                      |
|------------|--------------------------------------------------------------------|------------|--------------------------------|
| H99        | <i>MAT<math>\alpha</math></i>                                      |            | (Perfect <i>et al.</i> , 1993) |
| H99-Eunich | <i>MAT<math>\alpha</math></i>                                      | H99        |                                |
| BE7-151    | <i>MAT<math>\alpha</math> atf1<math>\Delta</math>::HYG</i>         | H99-Eunich |                                |
| YSB64      | <i>MAT<math>\alpha</math> hog1<math>\Delta</math>::NAT-STM#177</i> | H99        | (Bahn <i>et al.</i> , 2005)    |
| YSB261     | <i>MAT<math>\alpha</math> ssk1<math>\Delta</math>::NAT-STM#205</i> | H99        | (Bahn <i>et al.</i> , 2006)    |
| YSB349     | <i>MAT<math>\alpha</math> skn7<math>\Delta</math>::NAT-STM#201</i> | H99        | (Bahn <i>et al.</i> , 2006)    |
| YSB733     | <i>MAT<math>\alpha</math> P<sub>CTR</sub>::CAN2</i>                | H99        | This study                     |
| YSB734     | <i>MAT<math>\alpha</math> P<sub>CTR</sub>::CAN2</i>                | H99        | This study                     |
| YSB735     | <i>MAT<math>\alpha</math> P<sub>CTR</sub>::CAN2</i>                | H99        | This study                     |
| YSB667     | <i>MAT<math>\alpha</math> cas3<math>\Delta</math>::NAT-STM#122</i> | H99        | This study                     |
| YSB668     | <i>MAT<math>\alpha</math> cas3<math>\Delta</math>::NAT-STM#122</i> | H99        | This study                     |
| YSB669     | <i>MAT<math>\alpha</math> cas3<math>\Delta</math>::NAT-STM#122</i> | H99        | This study                     |
| YSB676     | <i>MAT<math>\alpha</math> atf1<math>\Delta</math>::NAT-STM#220</i> | H99        | This study                     |
| YSB678     | <i>MAT<math>\alpha</math> atf1<math>\Delta</math>::NAT-STM#220</i> | H99        | This study                     |
| YSB679     | <i>MAT<math>\alpha</math> atf1<math>\Delta</math>::NAT-STM#220</i> | H99        | This study                     |

  

| Primer Name | Sequence                                          | Comment                               |
|-------------|---------------------------------------------------|---------------------------------------|
| B79         | TGTGGATGCTGGCGGAGGATA                             | <i>ACT1</i> promoter screening oligo  |
| B93         | CTATGCTGTAATGACTGAGCC                             | CAN2 CR2                              |
| B354        | GCATGCAGGATTCGAGTG                                | NAT/CTR Left                          |
| B355        | GATTGGTGAAGTCGTTGTCC                              | NAT/CTR Right                         |
| B356        | CATTTTCGCTTGCCATAAGTG                             | CAN2 CSO1                             |
| B357        | CACCTTCTTGATTGTAGGGG                              | CAN2 CL1                              |
| B358        | <u>CACTCGAATCCTGCATGCAAACCCCAACCAACCCCGATTG</u>   | CAN2 CL2                              |
| B359        | <u>CGACAACGACTTCACCAATCATGCCTTTCCACGCTGAACC</u>   | CAN2 CR1                              |
| B1026       | GTAAAACGACGGCCAGTGAGC                             | M13F extended                         |
| B1027       | CAGGAAACAGCTATGACCATG                             | M13R extended                         |
| B1243       | GAGTAGAGGAGTGGATTGGG                              | ATF1-L1 for the left flanking region  |
| B1244       | <u>GCTCACTGGCCGTCGTTTTACCCATTGTTCAAGCAGAGC</u>    | ATF1 L2 for the left flanking region  |
| B1245       | <u>CATGGTCATAGCTGTTTCCTGGGCTTACTGCTATCTTGATGC</u> | ATF1 R1 for the right flanking region |
| B1246       | GAAAGAGGAACTACATACTGGGTC                          | ATF1 R2 for the right flanking region |
| B1247       | GTCTTTTGCTCCTTGAAACC                              | ATF1 screening oligo paired with B79  |
| B1377       | ATTGATTCCAGCAGACCCC                               | ATF1 southern probe paired with B1780 |

|       |                                                   |                                          |
|-------|---------------------------------------------------|------------------------------------------|
| B1454 | AAGGTGTTCCCCGACGACGAATCG                          | NAT Split marker Right (NSR)             |
| B1455 | AACTCCGTCGCGAGCCCCATCAAC                          | NAT Split Marker Left (NSL)              |
| B1780 | ACCAGGTGTAAACCCAGTCC                              | ATF1 southern probe paired with<br>B1377 |
| B1817 | AAAACCTGGGCGGAACACAG                              | CAS3 screening oligo paired with<br>B79  |
| B1818 | CGTCGGACATTCATCAATCTAC                            | CAS3 L1 for the left flanking region     |
| B1819 | <u>GCTCACTGGCCGTCGTTTTACTTGGCAGGAAGAGAGTTATG</u>  | CAS3 L2 for the left flanking region     |
| B1820 | <u>CATGGTCATAGCTGTTTCCTGGCATAGTGTGGCTGACTTTAG</u> | CAS3 R1 for the right flanking<br>region |
| B1821 | ATGGTCCCCTGCTCACTATCC                             | CAS3 R2 for the right flanking<br>region |
| B1829 | CCGAAGCCTTTTGTGACTAC                              | CAS3 southern probe oligo                |

---

Each *NAT-STM#* indicates the *Nat<sup>r</sup>* marker with a unique signature tag.

**References for Table S1**

- Bahn, Y.S., Geunes-Boyer, S., and Heitman, J. (2007). Ssk2 mitogen-activated protein kinase kinase kinase governs divergent patterns of the stress-activated Hog1 signaling pathway in *Cryptococcus neoformans*. *Eukaryot. Cell* *6*, 2278-2289.
- Bahn, Y.S., Hicks, J.K., Giles, S.S., Cox, G.M., and Heitman, J. (2004). Adenylyl cyclase-associated protein Aca1 regulates virulence and differentiation of *Cryptococcus neoformans* via the cyclic AMP-protein kinase A cascade. *Eukaryot. Cell* *3*, 1476-1491.
- Bahn, Y.S., Kojima, K., Cox, G.M., and Heitman, J. (2005). Specialization of the HOG pathway and its impact on differentiation and virulence of *Cryptococcus neoformans*. *Mol. Biol. Cell* *16*, 2285-2300.
- Bahn, Y.S., Kojima, K., Cox, G.M., and Heitman, J. (2006). A unique fungal two-component system regulates stress responses, drug sensitivity, sexual development, and virulence of *Cryptococcus neoformans*. *Mol. Biol. Cell* *17*, 3122-3135.
- Idnurm, A., Walton, F.J., Floyd, A., Reedy, J.L., and Heitman, J. (2009). Identification of *ENAI* as a virulence gene of the human pathogenic fungus *Cryptococcus neoformans* through signature-tagged insertional mutagenesis. *Eukaryot Cell* *8*, 315-326.
- Kwon-Chung, K.J., Edman, J.C., and Wickes, B.L. (1992). Genetic association of mating types and virulence in *Cryptococcus neoformans*. *Infect. Immun.* *60*, 602-605.
- Liu, O.W., Chun, C.D., Chow, E.D., Chen, C., Madhani, H.D., and Noble, S.M. (2008). Systematic genetic analysis of virulence in the human fungal pathogen *Cryptococcus neoformans*. *Cell* *135*, 174-188.
- Perfect, J.R., Ketabchi, N., Cox, G.M., Ingram, C.W., and Beiser, C.L. (1993). Karyotyping of *Cryptococcus neoformans* as an epidemiological tool. *J. Clin. Microbiol.* *31*, 3305-3309.
