# Supplementary material for: Comparative Transcriptome Analysis of the CO2 Sensing Pathway Via Differential Expression of Carbonic Anhydrase in Cryptococcus neoformans
Source: Oxford University Press journal article supplement (doi:10.1534/genetics.110.118315), 2010-06-03
Supplement: tables2.xls [file tables2.xls]

## Sheet: log ration raw data for supplem
TABLE S2
The whole microarray data generated by this study
Gene ID/ name									Biological function							Stress Response Genes of C. neoformans var. grubii H99								Gene expression (Log2 (Cy5/Cy3))
C.neo (JEC21) ID	C.neo (H99) ID	Sce ID	Sce_Gene (SGD)	Spo ID	Spo_Gene (GeneDB)	Cal ID (SGTC)	Cal ID (CYGD)	Cal_Gene (CandiaDB)	KOGs ID	KOGs Catagory	KOGs Description	Cn.H99.v2 Description	Sce_Description (SGD)	Spo_Description (GeneDB)	Cal_Description (CandiaDB)	Cne_OsR-up_2.0	Cne_OsR-dw_2.0	Cne_FxR-up_2.0	Cne_FxR-dw_2.0	Cne_OxR-up_2.0	Cne_OxR-dw_2.0	Cne_SSR-up_2.0	Cne_SSR-dw_2.0	H99 0time 1st (sat 0.05) 3-5-09 101	H99 0time 2nd (sat 0.05) 3-5-09 3	H99 0time 3rd (sat 0.05) 3-5-09 6	H99 BCS 12time 1st (sat 0.05) 3-10-09 32(dye swap)	H99 BCS 12time 2nd (sat 0.05) 3-7-09 15	H99 BCS 12time 3rd (sat 0.05) 3-8-09 23	H99 Cu 12time 1st (sat 0.05) 3-6-09 8	H99 Cu 12time 2nd (sat 0.05) 3-7-09 16	H99 Cu 12time 3rd (sat 0.05) 3-8-09 24	CAN2 0time 1st (sat 0.05) 3-10-09 34	CAN2 0time 2nd (sat 0.05) 3-10-09 33(dye swap)	CAN2 0time 3rd (sat 0.05) 3-5-09 5	CAN2 BCS 12time 1st (sat 0.05) 3-6-09 9	CAN2 BCS 12time 2nd (sat 0.05) 3-7-09 19	CAN2 BCS 12time 3rd (sat 0.05) 3-8-09 27	CAN2 Cu 12time 1st (sat 0.05) 3-6-09 10	CAN2 Cu 12time 23rd (sat 0.05) 3-8-09 28	CAN2 Cu 12time 2nd (sat 0.05) 3-7-09 20
162.m02116	CNAG_04106	None	None	None	None	None	None	None	KOG0499	PT	Cyclic nucleotide-gated cation channel CNCG4	conserved hypothetical protein	None	None	None	None	Cne_OsR-dw_2.0	None	None	None	None	None	Cne_OsSR-dw_2.0	0.233	0.045	-0.174	-0.596	0.904	0.601	0.148	-0.033	0.722	0.15	0.3	-0.293	0.378	-0.153	-0.014	0.223	0.227	0.484
162.m02118	None	None	None	None	None	None	None	None	None	None	None	None	None	None	None	None	None	None	None	None	None	None	None	0.668	0.524	0.366	-0.151	-0.132	-0.01	0.466	1.104	0.177	0.236	0.342	-0.073	0.191	-0.07	0.394	0.579	0.24	0.251
162.m02150	CNAG_04261	None	None	SPBC1347.08c	None	None	None	None	KOG4705	S	Uncharacterized conserved protein	conserved hypothetical protein	None	ribonuclease H2 complex subunit	None	None	None	None	None	None	None	None	None	0.031	0.867	0.502	-0.485	0.616	0.217	0.243	0.268	0.339	0.055	0.225	0.256	0.228	-0.027	-0.046	-0.083	-0.213	-0.022
162.m02156	CNAG_04255	None	None	None	None	None	None	None	None	None	None	conserved hypothetical protein	None	None	None	None	None	None	None	None	None	None	None	0.576	0.106	-0.079	-0.178	0.338	-0.336	-0.545	0.53	-0.184	0.169	0.552	0.009	-0.26	-0.252	-0.419	-0.256	-0.332	0.233
162.m02171	CNAG_04240	None	None	None	None	None	None	None	KOG3476	Z	Microtubule-associated protein CRIPT	conserved hypothetical protein	None	None	None	None	None	None	None	None	None	None	None	0.685	0.605	0.108	-0.062	-1.034	-0.28	0.512	0.943	-0.794	0.272	0.357	0.227	0.032	-0.008	-0.143	0.482	-0.012	0.199
162.m02176	CNAG_04233	None	None	None	None	None	None	None	None	None	None	conserved hypothetical protein	None	None	None	None	None	None	None	None	None	None	None	0.675	0.23	0.168	-0.268	0.58	-0.097	-0.296	0.822	0.12	0.208	0.472	0.135	-0.123	-0.195	0.12	-0.177	0.302	0.073
162.m02195	CNAG_04216	None	None	None	None	None	None	None	KOG1516	R	Carboxylesterase and related proteins	conserved hypothetical protein	None	None	None	None	None	None	None	None	None	None	None	0.151	1.121	1.322	-0.045	-0.449	0.606	0.674	1.098	2.433	0.347	0.39	-0.065	0.783	0.005	0.585	0.7	0.891	0.454
162.m02197	None	None	None	None	None	None	None	None	None	None	None	None	None	None	None	None	None	None	None	None	None	None	None	0.265	0.218	0.143	-0.176	0.438	-0.375	-0.318	-0.102	-0.108	0.132	0.243	0.053	-0.355	-0.466	-0.501	-0.301	-0.097	0.068
162.m02200	CNAG_04211	YPL169C	MEX67	SPBC1921.03c	mex67	orf19.488	ca4517	MEX67	KOG3763	A	mRNA export factor TAP/MEX67	conserved hypothetical protein	Poly(A)RNA binding protein involved in nuclear mRNA export, component of the nuclear pore; ortholog of human TAP	mRNA export receptor Mex67	poly(A)+RNA binding protein involved in nuclear mRNA export (by homology)	None	None	None	None	None	None	None	None	-0.148	0.813	0.109	-0.389	0.285	-0.098	-0.151	-0.305	0.009	0.136	0.064	-0.121	-0.129	0.056	-0.385	-0.259	-0.196	-0.249
162.m02222	CNAG_04193	None	None	None	None	None	None	None	None	None	None	conserved hypothetical protein	None	None	None	None	None	None	None	None	None	None	None	0.078	0.624	-0.014	-0.285	0.264	0.207	-0.237	-0.489	-0.09	0.122	0.345	-0.008	-0.096	-0.45	-0.209	-0.128	-0.218	0.09
162.m02231	None	None	None	None	None	None	None	None	None	None	None	None	None	None	None	None	None	None	None	None	None	None	None	0.601	-0.262	-0.077	-0.335	0.686	-0.323	-0.454	0.574	0.103	0.174	0.383	-0.17	-0.339	-0.292	-0.534	-0.302	-0.802	0.19
162.m02236	CNAG_04182	None	None	None	None	None	None	None	KOG0800	O	FOG: Predicted E3 ubiquitin ligase	conserved hypothetical protein	None	None	None	None	None	None	None	None	Cne_OxR-dw_2.0	None	Cne_OxSR-dw_2.0	0.104	0.841	0.528	-0.408	0.725	0.066	0.154	0.118	-0.209	0.099	0.237	0.247	0.206	0.008	0.045	0.109	-0.332	0.109
162.m02241	CNAG_04177	None	None	None	None	None	None	None	KOG3250	OT	COP9 signalosome, subunit CSN7	Cops7b protein	None	None	None	None	None	None	None	None	None	None	None	-0.221	1.081	0.362	-0.36	0.241	0.087	-0.03	-0.283	0.274	0.147	0.055	0.224	0.099	0.104	-0.202	-0.178	-0.053	-0.32
162.m02255	CNAG_04165	None	None	None	None	None	None	None	KOG4593	D	Mitotic checkpoint protein MAD1	conserved hypothetical protein	None	None	None	None	None	None	None	None	None	None	None	-0.144	1.229	0.604	-0.312	0.599	0.222	-0.006	-0.412	0.175	0.14	0.428	0.291	0.129	-0.481	-0.138	-0.043	0.212	-0.104
162.m02262	CNAG_04157	None	None	SPBC409.04c	mis12	None	None	None	None	None	None	conserved hypothetical protein	None	kinetochore protein Mis12	None	None	None	None	None	None	None	None	None	0.412	0.851	0.55	-0.235	0.723	0.139	0.01	0.124	0.399	0.158	0.166	0.45	0.023	-0.13	-0.02	-0.088	0.421	0.116
162.m02279	CNAG_04140	None	None	None	None	None	None	None	None	None	None	conserved hypothetical protein	None	None	None	None	None	None	None	None	None	None	None	-0.016	0.634	0.366	-0.455	0.903	0.152	0.103	0.138	0.467	0.004	0.246	0.168	0.088	-0.176	-0.257	-0.114	-0.16	0.05
162.m02281	CNAG_04139	None	None	None	None	None	None	None	KOG1952	K	Transcription factor NF-X1, contains NFX-type Zn2+-binding and R3H domains	conserved hypothetical protein	None	None	None	None	Cne_OsR-dw_2.0	None	Cne_FxR-dw_2.0	None	None	None	None	-0.256	1.336	0.433	-0.325	0.478	0.008	-0.059	-0.277	0.32	0.141	0.028	0.26	0.142	0.126	-0.042	-0.096	0.02	-0.235
162.m02286	CNAG_04133	None	None	None	None	orf19.6399	ca5129	ATS1	KOG1426	S	FOG: RCC1 domain	conserved hypothetical protein	None	None	alpha-tubulin suppressor (by homology)	None	None	None	None	None	None	None	None	0.05	1.059	0.251	-0.296	0.86	0.251	0.179	0.005	0.395	0.029	0.138	0.286	0.397	0.174	-0.061	0.157	0.759	0.175
162.m02296	CNAG_04285	None	None	None	None	None	None	None	KOG1181	S	FOG: Low-complexity	conserved hypothetical protein	None	None	None	None	None	None	None	None	None	None	None	0.07	-0.182	-0.085	-0.464	0.469	-0.139	-0.169	0.09	0.02	-0.097	-0.001	-0.204	-0.141	0.103	-0.478	-0.12	-0.287	0.05
162.m02299	CNAG_04288	YGL018C	JAC1	None	None	None	None	None	KOG3192	O	Mitochondrial J-type chaperone	conserved hypothetical protein	Specialized J-protein that functions with Hsp70 in Fe-S cluster biogenesis in mitochondria, involved in iron metabolism; contains a J domain typical to J-type chaperones; localizes to the mitochondrial matrix	None	None	None	None	None	None	None	None	None	None	-0.071	0.819	0.396	-0.291	0.483	0.134	-0.064	-0.41	0.315	0.118	0.383	0.079	0.07	-0.531	-0.32	-0.064	0.137	-0.096
162.m02308	CNAG_04296	None	None	None	None	None	None	None	None	None	None	conserved hypothetical protein	None	None	None	None	None	None	None	None	None	None	None	-0.241	1.236	0.469	-0.376	0.452	0.027	-0.059	-0.331	0.319	0.161	0.04	0.327	0.048	0.117	-0.139	-0.13	-0.025	-0.153
162.m02313	CNAG_04300	None	None	None	None	None	None	None	None	None	None	conserved hypothetical protein	None	None	None	None	None	None	None	None	None	None	None	-0.058	1.175	0.019	-0.182	0.45	0.25	0.141	-0.135	0.171	0.087	0.166	0.197	0.25	0.328	-0.01	0.208	0.719	0.174
162.m02314	None	None	None	None	None	None	None	None	None	None	None	None	None	None	None	None	None	None	None	None	None	None	None	-0.185	0.533	-0.393	-0.371	0.682	0.171	0.418	0.365	0.619	-0.062	0.002	0.27	0.295	0.376	0.028	0.327	0.103	0.515
162.m02322	CNAG_04309	None	None	None	None	None	None	None	KOG1776	T	Zn-binding protein Push	conserved hypothetical protein	None	None	None	None	None	None	None	Cne_OxR-up_2.0	None	Cne_OxSR-up_2.0	None	-0.262	1.111	0.343	-0.257	0.686	0.261	-0.016	-0.232	0.358	0.257	0.362	0.301	0.136	0.516	-0.211	-0.015	0.513	0.16
162.m02324	CNAG_04311	None	None	SPBC1604.18c	None	None	None	None	KOG2911	S	Uncharacterized conserved protein	conserved hypothetical protein	None	vacuolar sorting protein (predicted)	None	None	None	None	None	Cne_OxR-up_2.0	None	Cne_OxSR-up_2.0	None	-0.283	0.956	0.015	-0.358	0.619	0.344	0.126	-0.117	0.205	-0.107	0.055	0.269	0.354	-0.058	-0.255	-0.01	0.295	-0.102
162.m02345	CNAG_04330	None	None	None	None	None	None	None	KOG0781	U	Signal recognition particle receptor, alpha subunit	conserved hypothetical protein	None	None	None	None	None	None	None	None	None	None	None	0.12	1.3	0.447	-0.107	-0.762	-0.517	0.868	1.185	0.388	0.326	0.361	-0.383	0.426	-0.073	0.621	0.711	-0.206	-0.164
162.m02347	CNAG_04333	None	None	None	None	None	None	None	None	None	None	conserved hypothetical protein	None	None	None	None	None	None	None	None	None	None	None	-0.161	1.22	0.55	-0.282	0.639	0.399	0.121	-0.197	0.412	0.077	0.232	0.464	0.214	0.31	-0.197	0.163	0.725	0.194
162.m02386	CNAG_04369	None	None	None	None	None	None	None	None	None	None	conserved hypothetical protein	None	None	None	None	None	None	None	None	None	None	None	-0.26	1.184	0.452	-0.305	0.852	0.192	0.082	-0.298	0.373	0.274	0.343	0.208	0.304	0.484	-0.209	0.01	0.434	0.186
162.m02405	CNAG_04385	None	None	None	None	None	None	None	KOG0802	O	E3 ubiquitin ligase	conserved hypothetical protein	None	None	None	None	None	None	None	None	Cne_OxR-dw_2.0	None	Cne_OxSR-dw_2.0	0.184	0.202	-0.063	-0.202	-0.496	-0.007	0.602	1.413	-0.153	0.313	0.817	0.526	0.803	0.234	0.715	0.472	-0.39	0.162
162.m02411	None	None	None	None	None	None	None	None	None	None	None	None	None	None	None	None	None	None	None	None	None	None	None	0.216	1.56	0.734	-0.192	0.99	0.348	0.537	0.524	0.662	0.253	0.173	0.812	0.982	0.579	0.614	0.455	0.593	0.378
162.m02426	CNAG_04404	None	None	SPBC29A10.14	rec8	None	None	None	KOG1213	D	Sister chromatid cohesion complex Cohesin, subunit RAD21/SCC1	conserved hypothetical protein	None	meiotic cohesin complex subunit Rec8	None	None	None	None	None	None	None	None	None	-0.247	1.089	0.082	-0.248	0.804	0.271	0.196	-0.214	0.355	-0.044	0.068	0.535	0.45	-0.027	-0.195	0.045	0.551	-0.047
162.m02467	CNAG_04434	None	None	None	None	None	None	None	KOG4475	RP	FOG: Immunoglobin and related proteins	conserved hypothetical protein	None	None	None	None	None	None	None	None	None	None	None	-0.287	1.124	0.471	-0.291	0.703	0.199	0.015	-0.207	0.285	0.234	0.336	0.144	0.136	0.585	-0.273	-0.087	0.463	0.202
162.m02476	CNAG_04442	None	None	None	None	None	None	None	None	None	None	conserved hypothetical protein	None	None	None	None	None	None	None	None	None	None	None	-0.205	0.54	-0.04	-0.464	0.77	0.357	0.391	0.35	0.696	-0.049	-0.086	0.21	0.552	0.434	-0.062	0.187	0.124	0.261
162.m02479	CNAG_04446	None	None	None	None	None	None	None	None	None	None	conserved hypothetical protein	None	None	None	None	None	None	None	None	None	None	None	-0.058	1.183	0.413	-0.243	0.953	0.308	0.057	-0.121	0.456	0.065	0.119	0.329	0.47	0.449	-0.186	0.23	0.941	0.255
162.m02496	CNAG_04463	None	None	None	None	None	None	None	KOG3046	K	Transcription factor, subunit of SRB subcomplex of RNA polymerase II	conserved hypothetical protein	None	None	None	None	None	None	None	Cne_OxR-up_2.0	None	Cne_OxSR-up_2.0	None	-0.08	0.601	-0.005	-0.436	0.734	0.03	0.414	0.425	0.195	-0.023	-0.078	0.124	0.345	0.375	-0.183	0.293	-0.004	0.3
162.m02497	None	None	None	None	None	None	None	None	None	None	None	None	None	None	None	None	None	None	None	None	None	None	None	-0.057	1.405	0.862	-0.188	1.123	0.592	0.848	0.875	-2.594	0.472	-0.01	1.559	0.939	0.577	0.731	0.355	0.391	0.274
162.m02498	CNAG_04464	None	None	None	None	None	None	None	None	None	None	conserved hypothetical protein	None	None	None	None	None	None	None	None	None	None	None	-0.101	1.248	0.535	-0.338	0.783	0.241	0.233	-0.077	0.729	0.095	0.182	0.553	0.466	0.439	0.037	0.23	1.027	0.089
162.m02511	None	None	None	None	None	None	None	None	None	None	None	None	None	None	None	None	None	None	None	None	None	None	None	-0.224	0.941	-0.006	-0.38	1.345	0.495	0.47	0.253	0.528	0.018	-0.035	0.101	0.8	0.36	0.306	0.211	0.497	0.215
162.m02517	CNAG_07772	None	None	None	None	None	None	None	KOG3525	O	Subtilisin-like proprotein convertase	conserved hypothetical protein	None	None	None	None	None	None	None	None	None	None	None	0.301	1.031	0.822	-0.048	0.506	0.216	0.688	0.63	1.401	0.176	0.218	0.762	0.667	0.647	0.693	0.436	0.92	0.373
162.m02519	CNAG_07774	None	None	None	None	None	None	None	KOG4177	M	Ankyrin	conserved hypothetical protein	None	None	None	None	None	None	None	None	None	None	None	-0.101	1.184	0.342	-0.23	0.794	0.394	0.18	-0.039	0.285	0.074	0.11	0.49	0.519	0.517	-0.12	0.186	1.06	0.131
162.m02524	CNAG_07775	None	None	SPBC409.17c	None	None	None	None	None	None	None	conserved hypothetical protein	None	DUF1769 family protein	None	None	None	None	None	None	None	None	None	0.002	0.009	-0.582	-0.526	0.822	0.192	0.317	0.318	0.312	0.061	-0.007	-0.603	0.292	0.223	-0.202	0.26	0.004	0.298
162.m02526	CNAG_04492	None	None	None	None	None	None	None	None	None	None	conserved hypothetical protein	None	None	None	None	None	None	None	None	None	None	None	0.073	0.975	0.541	-0.29	0.829	0.039	0.081	0.029	0.536	0.199	0.199	0.217	0.029	-0.215	-0.1	-0.139	0.37	0.124
162.m02541	CNAG_04506	None	None	None	None	None	None	None	None	None	None	conserved hypothetical protein	None	None	None	None	None	None	None	None	None	None	None	0.031	1.074	0.529	-0.441	0.682	0.093	0.153	0.044	0.11	0.096	0.447	0.239	0.153	-0.179	-0.078	-0.136	-0.146	-0.177
162.m02543	CNAG_04508	None	None	None	None	None	None	None	KOG0868	O	Glutathione S-transferase	conserved hypothetical protein	None	None	None	None	None	None	None	None	None	None	None	-0.282	1.271	0.348	-0.312	0.779	0.319	0.171	-0.228	0.328	-0.076	0.09	0.328	0.402	-0.054	-0.147	0.018	0.471	-0.124
162.m02544	CNAG_04509	None	None	None	None	None	None	None	KOG0166	U	Karyopherin (importin) alpha	conserved hypothetical protein	None	None	None	None	None	None	None	None	None	None	None	0.019	1.221	0.608	-0.284	0.677	0.226	0.149	-0.002	0.554	0.147	0.207	0.636	0.285	-0.169	0.16	0.016	0.619	0.139
162.m02565	CNAG_04534	None	None	None	None	None	None	None	None	None	None	conserved hypothetical protein	None	None	None	None	None	None	None	None	None	None	None	0.164	0.643	0.511	-0.307	1.098	0.227	0.465	0.853	0.358	0.39	-0.022	0.312	0.413	0.416	-0.009	0.17	-0.017	0.277
162.m02575	CNAG_04544	None	None	None	None	None	None	None	KOG4623	S	Uncharacterized conserved protein	conserved hypothetical protein	None	None	None	None	None	None	None	None	None	None	None	0.016	0.839	0.485	-0.436	0.667	0.297	0.163	0.123	0.341	0.138	0.438	0.412	0.273	-0.048	0.077	0.001	-0.188	-0.008
162.m02576	CNAG_04545	None	None	SPCC4B3.08	None	None	None	None	None	None	None	conserved hypothetical protein	None	C-terminal domain kinase I (CTDK-I) gamma subunit (predicted)	None	None	None	None	None	None	None	None	None	-0.215	1.198	0.527	-0.272	0.886	0.216	0.043	-0.22	0.272	0.202	0.296	0.28	0.118	0.514	-0.13	-0.043	0.469	0.199
162.m02586	CNAG_06802	None	None	None	None	None	None	None	KOG0236	P	Sulfate/bicarbonate/oxalate exchanger SAT-1 and related transporters (SLC26 family)	conserved hypothetical protein	None	None	None	None	None	None	None	None	None	None	None	0.432	1.418	0.793	-0.012	0.495	0.188	0.458	0.321	0.634	0.111	0.211	0.843	0.788	0.527	0.071	0.384	0.31	0.237
162.m02589	CNAG_04564	None	None	None	None	None	None	None	KOG1618	R	Predicted phosphatase	phytanoyl-CoA dioxygenase family protein	None	None	None	None	None	None	None	None	None	None	None	-0.272	1.165	0.122	-0.338	0.671	0.278	0.183	-0.365	0.196	-0.065	0.071	0.261	0.382	-0.079	-0.178	-0.014	0.351	-0.201
162.m02595	CNAG_06998	YLR378C	SEC61	SPBC354.02c	sec61	orf19.6176	ca3197	SEC61	KOG1373	UO	Transport protein Sec61, alpha subunit	protein transporter	Essential subunit of Sec61 complex (Sec61p, Sbh1p, and Sss1p); forms a channel for SRP-dependent protein import and retrograde transport of misfolded proteins out of the ER; with Sec63 complex allows SRP-independent protein import into ER	translocon alpha subunit Sec61	ER protein-translocation complex subunit	None	None	None	None	None	None	None	None	-0.001	1.017	0.385	-0.278	0.584	0.132	-0.062	-0.35	0.109	0.141	0.35	0.092	0.046	0.444	-0.162	-0.064	0.196	0.202
162.m02596	None	None	None	None	None	None	None	None	None	None	None	None	None	None	None	None	None	None	None	None	None	None	None	-0.031	0.924	0.157	-0.358	0.547	0.363	-0.255	0.042	-0.094	0.162	0.231	0.027	-0.226	-0.379	-0.112	-0.308	-0.058	0.105
162.m02597	CNAG_07782	None	None	None	None	None	None	None	KOG0069	C	Glyoxylate/hydroxypyruvate reductase (D-isomer-specific 2-hydroxy acid dehydrogenase superfamily)	oxidoreductase	None	None	None	None	None	None	None	None	None	None	None	-0.158	0.963	0.207	-0.342	0.514	0.242	0.111	-0.291	0.188	-0.062	0.074	0.237	0.243	-0.045	-0.176	-0.04	0.321	-0.136
162.m02598	CNAG_07020	None	None	None	None	None	None	None	None	None	None	conserved hypothetical protein	None	None	None	None	None	None	None	None	None	None	None	-0.275	0.97	0.231	-0.219	0.633	0.165	-0.022	-0.287	0.186	0.178	0.291	0.12	0.134	0.41	-0.219	-0.095	0.441	0.08
162.m02599	CNAG_07781	None	None	None	None	None	None	None	KOG0054	Q	Multidrug resistance-associated protein/mitoxantrone resistance protein, ABC superfamily	ATP-dependent bile acid transporter	None	None	None	None	None	None	None	None	None	None	None	-0.018	1.011	0.335	-0.405	0.812	0.208	0.22	0.153	0.547	0.106	0.516	0.082	0.27	-0.234	0.029	-0.046	-0.326	-0.154
162.m02600	CNAG_04546	YOR273C	TPO4	None	None	None	None	None	KOG0255	R	Synaptic vesicle transporter SVOP and related transporters (major facilitator superfamily)	multidrug transporter	Polyamine transport protein, recognizes spermine, putrescine, and spermidine; localizes to the plasma membrane; member of the major facilitator superfamily	None	None	None	None	None	None	None	None	None	None	-0.107	1.189	0.84	-0.326	1.065	0.191	0.209	0.146	0.7	0.183	0.194	0.422	0.415	-0.187	0.278	0.053	0.703	0.24
162.m02601	CNAG_04535	None	None	None	None	None	None	None	KOG0785	E	Isocitrate dehydrogenase, alpha subunit	tartrate dehydrogenase	None	None	None	None	None	None	None	None	None	None	None	0.156	0.807	0.748	-0.398	0.682	0.14	0.198	0.154	0.064	0.15	0.477	0.375	0.348	-0.068	-0.046	0.022	-0.215	-0.156
162.m02602	CNAG_04531	None	None	None	None	orf19.6443	ca5098	IPF1380	KOG1680	I	Enoyl-CoA hydratase	enoyl-CoA hydratase	None	None	delta3-cis-delta2-trans-enoyl-CoA isomerase (by homology)	None	None	None	None	None	Cne_OxR-dw_2.0	None	Cne_OxSR-dw_2.0	-0.162	0.78	-0.034	-0.3	0.4	0.179	0.075	-0.189	0.171	-0.053	0.028	0.048	0.196	0.018	-0.3	-0.059	0.237	-0.084
162.m02603	CNAG_04524	None	None	None	None	None	None	None	KOG3607	O	Meltrins, fertilins and related Zn-dependent metalloproteinases of the ADAMs family	zinc metalloprotease	None	None	None	None	None	Cne_FxR-up_2.0	None	Cne_OxR-up_2.0	None	None	None	0.291	0.833	0.37	-0.237	0.766	-0.067	0.147	0.068	0.242	0.166	0.183	0.17	0.049	-0.194	-0.165	-0.013	0.291	0.191
162.m02604	None	None	None	None	None	None	None	None	None	None	None	None	None	None	None	None	None	None	None	None	None	None	None	-0.002	1.247	0.707	-0.228	0.633	0.417	0.617	0.757	<no data>	0.436	0.017	1.419	0.967	0.747	0.88	0.247	0.33	0.315
162.m02605	CNAG_04522	None	None	None	None	None	None	None	KOG4666	I	Predicted phosphate acyltransferase, contains PlsC domain	conserved hypothetical protein	None	None	None	None	None	None	None	None	None	None	None	0.409	0.697	0.5	-0.382	0.634	0.125	0.221	0.238	-0.036	0.165	0.465	0.173	0.192	-0.039	0.194	-0.006	-0.29	-0.129
162.m02606	CNAG_04521	YNR074C	AIF1	None	None	orf19.2175	ca3743	IPF19998	KOG2495	C	NADH-dehydrogenase (ubiquinone)	oxidoreductase	Mitochondrial cell death effector that translocates to the nucleus in response to apoptotic stimuli, homolog of mammalian Apoptosis-Inducing Factor, putative reductase	None	unknown function	Cne_OsR-up_2.0	None	Cne_FxR-up_2.0	None	Cne_OxR-up_2.0	None	Cne_CSR-up_2.0	None	0.149	0.915	0.462	-0.268	0.847	0.246	0.183	0.145	0.351	0.157	0.15	0.419	0.104	-0.236	0.289	-0.008	0.489	0.095
162.m02607	CNAG_04520	None	None	None	None	None	None	None	None	None	None	D-aminoacylase	None	None	None	None	None	None	None	None	None	None	None	0.177	0.846	0.586	-0.457	0.967	0.127	0.273	0.182	0.517	0.103	0.483	0.392	0.327	-0.206	0.252	0.017	-0.298	-0.169
162.m02608	CNAG_04519	YGL196W	DSD1	SPAC1039.06	None	None	None	None	None	None	None	D-serine dehydratase	D-serine dehydratase (aka D-serine ammonia-lyase); converts D-serine to pyruvate and ammonia; specifc for D-serine, unlike the bacterial enzyme which recognizes both D-serine and L-serine as substrates	alanine racemase (predicted)	None	None	None	None	None	None	None	None	None	-0.054	1.152	0.326	-0.286	0.714	0.08	-0.048	-0.154	0.221	0.056	0.202	0.315	0.291	0.224	-0.217	-0.017	0.609	0.028
162.m02614	CNAG_07779	YGR205W	None	SPAC630.09c	mug58	orf19.7345	ca5578	IPF12536	KOG2878	R	Predicted kinase	D-glycerate 3-kinase	None	glycerate kinase (predicted)	unknown function	None	None	None	None	None	None	None	None	-0.133	1.321	0.58	-0.337	0.591	0.177	0	-0.358	0.362	0.096	0.432	0.443	0.205	-0.49	-0.039	-0.09	0.434	-0.042
162.m02615	CNAG_04536	None	None	None	None	orf19.3232	ca5430	IPF191	KOG2533	G	Permease of the major facilitator superfamily	nicotinamide mononucleotide permease	None	None	putative permease (by homology)	None	None	None	None	None	None	None	None	-0.316	1.199	0.422	-0.338	0.427	0.076	-0.079	-0.354	0.265	0.156	0.044	0.371	0.154	0.046	-0.198	-0.068	0.048	-0.151
162.m02616	CNAG_04538	YHR171W	ATG7	SPBC6B1.05c	None	orf19.707	ca0661	APG7	KOG2337	H	Ubiquitin activating E1 enzyme-like protein	autophagy APG7	Autophagy-related protein and dual specificity member of the E1 family of ubiquitin-activating enzymes; mediates the conjugation of Atg12p with Atg5p and Atg8p with phosphatidylethanolamine, required steps in autophagosome formation	ubiquitin-like conjugating enzyme	component of the autophagic system (by homology)	None	None	None	None	None	None	None	None	-0.094	1.081	0.365	-0.349	0.538	0.13	-0.078	-0.34	0.285	0.169	0.412	0.237	0.186	-0.592	-0.063	-0.083	0.202	0.035
162.m02617	CNAG_04539	YGR112W	SHY1	SPBC1215.01	shy1	orf19.4841	ca4742	SHY1	KOG1563	C	Mitochondrial protein Surfeit 1/SURF1/SHY1, required for expression of cytochrome oxidase	mitochondrial protein required for respiration	Mitochondrial inner membrane protein required for assembly of cytochrome c oxidase (complex IV); associates with complex IV assembly intermediates and complex III/complex IV supercomplexes; similar to human SURF1 involved in Leigh Syndrome	SURF-family protein Shy1	SURF homologue protein (by homology)	None	None	None	None	None	None	None	None	0.244	0.454	0.181	-0.429	0.71	0.363	-0.058	0.176	0.315	0.068	0.034	0.032	0.062	0.187	-0.114	-0.112	-0.092	0.254
162.m02619	CNAG_04540	YPL094C	SEC62	SPAC17G6.09	sec62	orf19.3031	ca5062	SEC62	KOG2927	U	Membrane component of ER protein translocation complex	endoplasmic reticulum receptor	Essential subunit of Sec63 complex (Sec63p, Sec62p, Sec66p and Sec72p); with Sec61 complex, Kar2p/BiP and Lhs1p forms a channel competent for SRP-dependent and post-translational SRP-independent protein targeting and import into the ER	ER protein translocation subcomplex subunit Sec62 (predicted)	subunit of ER protein-translocation complex (by homology)	None	None	None	None	None	None	None	None	0.168	0.891	0.263	-0.258	0.674	0.14	-0.083	0.003	0.31	0.056	0.201	0.281	0.182	0.258	-0.33	-0.061	0.575	0.116
162.m02620	CNAG_07780	YPL069C	BTS1	None	None	orf19.6674	ca4277	BTS1	None	None	None	farnesyltranstransferase	Geranylgeranyl diphosphate synthase, increases the intracellular pool of geranylgeranyl diphosphate, suppressor of bet2 mutation that causes defective geranylgeranylation of small GTP-binding proteins that mediate vesicular traffic	None	Geranylgeranyl diphosphate synthase (by homology)	None	None	None	None	None	Cne_OxR-dw_2.0	None	Cne_OxSR-dw_2.0	-0.154	0.928	0.14	-0.329	0.358	0.159	-0.099	-0.334	0.003	0.158	0.024	0.107	-0.023	0.048	-0.157	-0.079	-0.215	-0.154
162.m02622	CNAG_04513	YOR207C	RET1	SPAC4G9.08c	rpc2	orf19.5847	ca2878	RET1	KOG0215	K	RNA polymerase III, second largest subunit	DNA-directed RNA polymerase	Second-largest subunit of RNA polymerase III, which is responsible for the transcription of tRNA and 5S RNA genes, and other low molecular weight RNAs	DNA-directed RNA polymerase III complex subunit Rpc2	DNA-directed RNA polymerase III (by homology)	None	None	None	None	None	None	None	None	-0.095	1.193	0.561	-0.289	0.66	0.145	0.011	-0.349	0.351	0.136	0.467	0.355	0.122	-0.538	-0.092	-0.046	0.17	-0.106
162.m02623	CNAG_04510	YPR173C	VPS4	SPAC2G11.06	vps4	orf19.4339	ca1340	VPS4	KOG0739	O	AAA+-type ATPase	ATPase	AAA-type ATPase that is regulated by Vta1p; required for late endosome to vacuole transport; catalyzes the release of an endosomal membrane-associated class E VPS protein complex; regulates cellular sterol metabolism	AAA family ATPase Vps4	vacuolar sorting protein by homology to S. cerevisiae	None	None	None	None	None	Cne_OxR-dw_2.0	None	Cne_OxSR-dw_2.0	-0.154	1.003	0.368	-0.308	0.358	0.046	-0.029	-0.362	0.1	0.14	0.047	0.176	0.104	0.03	-0.105	-0.042	-0.056	-0.142
162.m02625	CNAG_04511	None	None	None	None	None	None	None	None	None	None	conserved hypothetical protein	None	None	None	None	None	None	None	None	None	None	None	-0.097	0.898	0.024	-0.365	0.328	0.025	-0.204	-0.367	-0.019	0.113	0.42	0.004	0.085	-0.739	-0.488	-0.24	-0.177	-0.123
162.m02626	CNAG_04507	None	None	None	None	None	None	None	None	None	None	conserved hypothetical protein	None	None	None	None	None	None	None	Cne_OxR-up_2.0	None	Cne_OxSR-up_2.0	None	-0.173	0.157	-0.45	-0.45	0.856	0.224	0.302	0.227	0.591	0.026	-0.064	-0.247	0.164	0.222	-0.334	0.108	0.035	0.294
162.m02627	CNAG_04505	YER020W	GPA2	SPAC23H3.13c	gpa2	orf19.1621	ca4012	GPA2	KOG0082	DT	G-protein alpha subunit (small G protein superfamily)	guanine nucleotide-binding protein subunit alpha	Nucleotide binding alpha subunit of the heterotrimeric G protein that interacts with the receptor Gpr1p, has signaling role in response to nutrients; green fluorescent protein (GFP)-fusion protein localizes to the cell periphery	heterotrimeric G protein alpha-2 subunit Gpa2	nucleotide-binding regulatory protein GPA2	None	None	None	None	None	None	None	None	-0.11	0.859	0.277	-0.369	0.385	0.146	-0.092	-0.309	0.082	0.19	0.072	0.257	-0.029	0.035	-0.2	-0.062	-0.121	-0.138
162.m02628	CNAG_04501	YKL211C	TRP3	SPBC1539.09c	trp1	orf19.5243	ca5004	TRP3	KOG4201	E	Anthranilate synthase component II	anthranilate synthase component 2	Bifunctional enzyme exhibiting both indole-3-glycerol-phosphate synthase and anthranilate synthase activities, forms multifunctional hetero-oligomeric anthranilate synthase:indole-3-glycerol phosphate synthase enzyme complex with Trp2p	anthranilate synthase component II	Anthranilate synthase / indole glycerol phosphate synthase (by homology)	None	None	None	None	Cne_OxR-up_2.0	None	Cne_OxSR-up_2.0	None	0.133	1.143	0.534	-0.201	0.65	0.155	0.014	0.134	0.329	0.098	0.156	0.436	0.313	0.374	-0.139	0.105	0.622	0.122
162.m02629	CNAG_04500	None	None	None	None	None	None	None	KOG1845	D	MORC family ATPases	conserved hypothetical protein	None	None	None	None	None	None	None	None	None	None	None	-0.058	1.342	0.527	-0.362	0.498	0.153	0.103	-0.239	0.267	0.15	0.443	0.347	0.195	-0.693	0.055	-0.04	0.393	-0.116
162.m02630	CNAG_04499	YGR167W	CLC1	SPBC9B6.08	clc1	orf19.4594	ca5156	CLC1	KOG4031	U	Vesicle coat protein clathrin, light chain	clathrin light chain	Clathrin light chain, subunit of the major coat protein involved in intracellular protein transport and endocytosis; thought to regulate clathrin function, two Clathrin heavy chains (CHC1) form the clathrin triskelion structural component	clathrin light chain	clathrin light chain (by homology)	None	None	None	None	None	None	None	None	0.2	0.661	0.09	-0.287	0.261	-0.094	-0.091	-0.286	-0.009	0.143	0.023	0.004	-0.122	0.093	-0.288	0.001	-0.223	-0.111
162.m02632	CNAG_04498	None	None	None	None	orf19.3852	ca1032	IPF19896	None	None	None	alpha-1,2-mannosidase	None	None	unknown function	None	None	None	None	None	Cne_OxR-dw_2.0	None	Cne_OxSR-dw_2.0	0.496	0.535	0.461	-0.121	0.513	0.013	0.435	0.101	-0.059	0.12	0.096	0.266	0.143	0.344	-0.039	0.266	0.024	0.337
162.m02633	CNAG_04494	YLR298C	YHC1	SPBP35G2.09	usp103	orf19.5492	ca2676	YHC1	KOG3454	A	U1 snRNP-specific protein C	U1 small nuclear ribonucleoprotein	Component of the U1 snRNP complex required for pre-mRNA splicing; putative ortholog of human U1C protein, which is involved in formation of a complex between U1 snRNP and the pre-mRNA 5' splice site	U1 snRNP-associated protein Usp103 (predicted)	SMALL NUCLEAR RIBONUCLEOPROTEIN C (by homology)	None	None	None	None	None	Cne_OxR-dw_2.0	None	Cne_OxSR-dw_2.0	0.487	0.243	0.1	-0.39	0.476	0.055	0.032	0.317	0.303	0.132	0.002	-0.359	-0.057	0.262	-0.256	0.023	-0.17	0.379
162.m02635	CNAG_07776	YFL001W	DEG1	SPAC25B8.05	None	orf19.6297	ca3236	DEG1	KOG2554	J	Pseudouridylate synthase	pseudouridylate synthase	Non-essential tRNA:pseudouridine synthase, introduces pseudouridines at position 38 or 39 in tRNA, important for maintenance of translation efficiency and normal cell growth, localizes to both the nucleus and cytoplasm	tRNA-pseudouridine synthase (predicted)	pseudouridine synthase (by homology)	None	None	None	None	None	Cne_OxR-dw_2.0	None	Cne_OxSR-dw_2.0	-0.129	1.261	0.496	-0.284	0.99	0.374	0.155	0.242	0.556	0.078	0.138	0.468	0.532	0.34	0.042	0.204	0.921	0.148
162.m02636	CNAG_04487	YCL055W	KAR4	None	None	orf19.3736	ca0307	IPF4719	None	None	None	transcription regulator	Transcription factor required for gene regulation in repsonse to pheromones; also required during meiosis; exists in two forms, a slower-migrating form more abundant during vegetative growth and a faster-migrating form induced by pheromone	None	similar to Saccharomyces cerevisiae Kar4p regulatory protein required for pheromone induction of karyogamy genes (by homology)	None	None	None	None	None	None	None	None	-0.033	1.067	0.476	-0.39	0.536	0.148	0.051	-0.355	0.217	0.126	0.351	0.26	0.159	-0.585	0.01	-0.051	0.239	0.113
162.m02637	CNAG_04485	YOR317W	FAA1	SPBP4H10.11c	lcf2	orf19.7592	ca5992	FAA4	KOG1180	I	Acyl-CoA synthetase	long-chain-fatty-acid-CoA-ligase	Long chain fatty acyl-CoA synthetase with a preference for C12:0-C16:0 fatty acids; involved in the activation of imported fatty acids; localized to both lipid particles and mitochondrial outer membrane; essential for stationary phase	long-chain-fatty-acid-CoA ligase	long-chain fatty acid--CoA ligase and synthetase 4 (by homology)	None	None	None	None	Cne_OxR-up_2.0	None	Cne_OxSR-up_2.0	None	0.065	0.848	0.159	-0.362	0.378	0.051	-0.108	-0.299	0.144	0.162	0.057	0.144	-0.01	-0.058	-0.23	-0.113	-0.109	-0.223
162.m02638	CNAG_07772	None	None	None	None	None	None	None	KOG3525	O	Subtilisin-like proprotein convertase	conserved hypothetical protein	None	None	None	None	None	None	None	None	None	None	None	-0.026	0.995	0.166	-0.463	1.115	0.635	0.33	0.304	0.125	0.079	-0.008	0.103	0.753	0.503	0.375	0.27	0.226	0.244
162.m02639	CNAG_04479	None	None	None	None	None	None	None	KOG1217	T	Fibrillins and related proteins containing Ca2+-binding EGF-like domains	conserved hypothetical protein	None	None	None	None	None	None	None	None	None	None	None	-0.259	1.186	0.646	-0.283	0.758	0.209	0.009	-0.247	0.452	0.227	0.317	0.258	0.179	0.443	-0.165	0.003	0.577	-0.091
162.m02640	None	None	None	None	None	None	None	None	None	None	None	None	None	None	None	None	None	None	None	None	None	None	None	0.257	0.644	0.308	-0.312	0.871	0.28	0.034	0.221	0.366	0.121	0.189	0.256	0.21	0.266	-0.074	0.111	0.6	0.348
162.m02641	CNAG_04484	YDL058W	USO1	SPAC29E6.03c	uso1	orf19.2629	None	None	KOG0946	U	ER-Golgi vesicle-tethering protein p115	AousoA	Essential protein involved in intracellular protein transport, coiled-coil protein necessary for transport from ER to Golgi; required for assembly of the ER-to-Golgi SNARE complex	ER to Golgi tethering factor Uso1 (predicted)	None	None	None	None	None	None	None	None	None	-0.088	0.974	0.152	-0.346	0.664	0.206	0.082	-0.283	0.227	-0.075	0.053	0.175	0.205	0.015	-0.269	-0.041	0.161	-0.112
162.m02642	CNAG_04488	YBR159W	IFA38	SPAC4G9.15	None	orf19.3859	ca3097	IPF6600	KOG1014	I	17 beta-hydroxysteroid dehydrogenase type 3, HSD17B3	ketoreductase	Microsomal beta-keto-reductase; contains oleate response element (ORE) sequence in the promoter region; mutants exhibit reduced VLCFA synthesis, accumulate high levels of dihydrosphingosine, phytosphingosine and medium-chain ceramides	ketoreductase (predicted)	unknown function	None	None	None	None	None	None	None	None	-0.192	1.1	0.382	-0.314	0.582	0.225	-0.073	-0.297	0.312	0.246	0.371	0.081	0.08	0.393	-0.064	-0.073	0.433	0.144
162.m02643	CNAG_04496	None	None	None	None	None	None	None	KOG2221	U	PDZ-domain interacting protein EPI64, contains TBC domain	rab GTPase activator	None	None	None	None	None	None	None	None	None	None	None	-0.361	1.158	0.199	-0.379	0.622	0.236	0.164	-0.272	0.167	-0.045	0.032	0.295	0.318	0.016	-0.215	-0.056	0.391	-0.232
162.m02645	CNAG_04514	YHR030C	SLT2	SPBC119.08	pmk1	orf19.7523	ca5865	MKC1	KOG0660	T	Mitogen-activated protein kinase	CMGC/MAPK/ERK protein kinase	Serine/threonine MAP kinase involved in regulating the maintenance of cell wall integrity and progression through the cell cycle; regulated by the PKC1-mediated signaling pathway	MAP kinase Pmk1	ser/thr protein kinase of MAP kinase family	None	None	None	None	None	None	None	None	-0.137	0.899	0.43	-0.249	0.516	0.181	-0.039	-0.179	0.273	0.254	0.331	0.207	0.074	0.447	-0.161	-0.129	0.517	0.179
162.m02648	CNAG_04474	None	None	None	None	None	None	None	None	None	None	monocarboxylic acid transporter	None	None	None	None	None	None	None	None	None	None	None	-0.365	1.093	0.05	-0.412	0.592	0.346	0.087	-0.231	0.341	-0.049	0.047	0.197	0.276	0.022	-0.135	-0.079	0.353	-0.194
162.m02649	CNAG_04471	None	None	None	None	None	None	None	KOG2844	E	Dimethylglycine dehydrogenase precursor	FAD dependent oxidoreductase superfamily	None	None	None	None	None	None	None	None	None	None	None	-0.118	1.005	0.191	-0.44	1.094	0.397	0.268	0.192	0.78	0.104	-0.038	-0.143	0.598	1.078	0.277	0.191	0.034	0.236
162.m02650	CNAG_04469	None	None	SPAC1039.07c	None	None	None	None	KOG1401	E	Acetylornithine aminotransferase	ornithine-oxo-acid aminotransferase	None	aminotransferase class-III	None	None	None	None	None	None	None	None	None	-0.268	1.329	0.597	-0.265	0.959	0.261	-0.04	-0.255	0.317	0.284	0.412	0.262	0.232	0.428	-0.148	-0.059	0.657	0.193
162.m02651	CNAG_04467	None	None	None	None	None	None	None	KOG2451	C	Aldehyde dehydrogenase	succinate-semialdehyde dehydrogenase	None	None	None	None	Cne_OsR-dw_2.0	None	None	None	Cne_OxR-dw_2.0	None	None	-0.2	1.112	0.226	-0.397	0.598	0.237	0.066	-0.184	0.224	-0.025	0.002	0.191	0.357	0.029	-0.125	-0.042	0.382	-0.213
162.m02653	CNAG_04466	YPL222W	FMP40	SPAC20G4.05c	None	orf19.2346	ca2341	IPF13838	KOG2542	S	Uncharacterized conserved protein (YdiU family)	UPF0061 protein	Putative protein of unknown function; the authentic, non-tagged protein is detected in highly purified mitochondria in high-throughput studies	UPF0061 family protein	unknown function	None	None	None	None	None	None	None	None	-0.228	1.287	0.475	-0.327	0.731	0.179	0.044	-0.496	0.428	0.275	0.406	0.26	0.292	0.407	-0.064	0.018	0.565	0.241
162.m02655	CNAG_04462	YLR097C	HRT3	SPCC1827.08c	pof7	orf19.4637	None	None	KOG2997	R	F-box protein FBX9	F-box domain-containing protein	Putative SCF-ubiquitin ligase F-box protein, based on both genetic and physical interactions and sequence similarity; identified in association with Cdc53p, Skp1p and Ubi4 in large and small-scale studies	F-box protein Pof7	None	None	None	None	None	Cne_OxR-up_2.0	None	Cne_OxSR-up_2.0	None	0.123	1.287	0.608	-0.171	0.882	0.359	0.172	0.344	0.511	0.146	0.155	0.549	0.565	0.37	0.047	0.281	0.984	0.195
162.m02656	CNAG_04458	YKL017C	HCS1	SPCC737.07c	None	orf19.6199	ca3215	HCS1	KOG1803	L	DNA helicase	DNA helicase	Hexameric DNA polymerase alpha-associated DNA helicase A involved in lagging strand DNA synthesis; contains single-stranded DNA stimulated ATPase and dATPase activities; replication protein A stimulates helicase and ATPase activities	DNA polymerase alpha-associated DNA helicase A (predicted)	putative DNA helicase A (by homology)	None	None	None	None	None	None	None	None	-0.208	1.001	0.24	-0.311	0.612	0.209	0.102	-0.273	0.045	-0.022	0.055	0.221	0.18	0.028	-0.324	-0.068	0.229	-0.147
162.m02659	CNAG_04453	YKL004W	AUR1	SPAC3H8.06	aur1	orf19.1945	ca3353	AUR1	None	None	None	inositolphosphorylceramide synthase	Phosphatidylinositol:ceramide phosphoinositol transferase (IPC synthase), required for sphingolipid synthesis; can mutate to confer aureobasidin A resistance	inositol phosphorylceramide synthase (predicted)	aureobasidin-resistance protein	None	None	None	None	None	None	None	None	0.337	0.416	0.043	-0.272	0.651	0.079	0.134	0.276	0.251	0.19	0.017	0.032	0.259	0.371	-0.133	0.051	-0.03	0.233
162.m02660	CNAG_04451	YNL221C	POP1	SPAC25B8.16	None	orf19.2404	ca0148	POP1	KOG3322	A	Ribonucleases P/MRP protein subunit	ribonucleases P/MRP protein subunit	Subunit of both RNase MRP, which cleaves pre-rRNA, and nuclear RNase P, which cleaves tRNA precursors to generate mature 5' ends; binds to the RPR1 RNA subunit in RNase P	RNase P and RNase MRP subunit (predicted)	protein component of ribonuclease P and ribonuclease MRP (by homology)	None	None	None	None	None	None	None	None	-0.243	1.159	0.661	-0.274	0.699	0.116	0.038	-0.416	0.345	0.277	0.429	0.218	0.251	0.402	-0.094	-0.045	0.657	0.083
162.m02661	CNAG_04450	YER164W	CHD1	SPAC3G6.01	hrp3	orf19.3035	ca5064	CHD1	KOG0384	K	Chromodomain-helicase DNA-binding protein	transcription regulator	Nucleosome remodeling factor that functions in regulation of transcription elongation; contains a chromo domain, a helicase domain and a DNA-binding domain; component of both the SAGA and SLIK complexes	ATP-dependent DNA helicase Hrp3	transcriptional regulator (by homology)	None	None	None	None	None	None	None	None	-0.259	0.921	0.107	-0.338	0.454	0.223	0.067	-0.193	0.087	0.03	0.029	0.248	0.17	0.024	-0.149	-0.023	0.369	-0.119
162.m02662	CNAG_04448	YBR084C-A	RPL19A	SPCC1682.14	rpl1902	orf19.5904	ca6141	RPL19A	KOG1696	J	60s ribosomal protein L19	60S ribosomal protein L19	Protein component of the large (60S) ribosomal subunit, nearly identical to Rpl19Bp and has similarity to rat L19 ribosomal protein; rpl19a and rpl19b single null mutations result in slow growth, while the double null mutation is lethal	60S ribosomal protein L19B	Ribosomal protein L19.e (by homology)	None	None	None	None	None	Cne_OxR-dw_2.0	None	Cne_OxSR-dw_2.0	0.357	0.697	0.346	-0.098	0.112	-0.432	-0.176	-0.447	-0.296	0.063	0	0.209	-0.332	-0.475	-0.445	-0.149	-0.209	-0.063
162.m02663	CNAG_04447	None	None	None	None	orf19.2514	ca2145	IPF12800	KOG2940	R	Predicted methyltransferase	chromosome 20 open reading frame 7	None	None	unknown function	None	None	None	None	None	None	None	None	-0.153	1.004	0.264	-0.38	0.328	0.02	-0.101	-0.266	0.021	0.155	0.099	0.138	0.009	-0.122	-0.226	-0.179	-0.258	-0.261
162.m02664	CNAG_04444	YMR288W	HSH155	SPAC27F1.09c	prp10	orf19.2675	ca3324	IPF6893	KOG0213	A	Splicing factor 3b, subunit 1	small nuclear ribonucleoprotein	U2-snRNP associated splicing factor that forms extensive associations with the branch site-3' splice site-3' exon region upon prespliceosome formation; similarity to the mammalian U2 snRNP-associated splicing factor SAP155	U2 snRNP-associated protein Sap155	unknown function	None	None	None	None	None	None	None	None	0.605	0.915	0.406	-0.151	0.622	0.026	0.1	0.141	0.26	0.192	0.135	0.39	-0.021	-0.284	0.083	-0.036	0.298	0.089
162.m02665	CNAG_04443	None	None	SPBC30D10.14	None	None	None	None	KOG3043	R	Predicted hydrolase related to dienelactone hydrolase	conserved hypothetical protein	None	dienelactone hydrolase family	None	None	None	None	None	None	None	None	None	0.258	-0.217	0.252	-0.608	0.558	-0.05	0.154	0.149	0.135	0.097	0.591	-0.19	0.114	-0.261	-0.518	0.125	-0.325	0.133
162.m02667	CNAG_04441	YER165W	PAB1	SPAC57A7.04c	pabp	orf19.3037	ca5065	IPF3584	KOG0123	AJ	Polyadenylate-binding protein (RRM superfamily)	polyadenylate-binding protein	Poly(A) binding protein, part of the 3'-end RNA-processing complex, mediates interactions between the 5' cap structure and the 3' mRNA poly(A) tail, involved in control of poly(A) tail length, interacts with translation factor eIF-4G	mRNA export shuttling protein	similar to Saccharomyces cerevisiae Pab1p mRNA polyadenylate-binding protein (by homology)	None	None	None	None	None	Cne_OxR-dw_2.0	None	Cne_OxSR-dw_2.0	0.034	0.739	0.349	-0.225	0.357	-0.007	-0.034	-0.324	0.279	0.105	0.358	0.11	0.003	-0.506	-0.158	-0.072	0.119	0.095
162.m02668	CNAG_04439	YBR127C	VMA2	SPAC637.05c	vma2	orf19.6634	ca4078	VMA2	None	None	None	vacuolar ATP synthase	Subunit B of the eight-subunit V1 peripheral membrane domain of the vacuolar H+-ATPase (V-ATPase), an electrogenic proton pump found throughout the endomembrane system; contains nucleotide binding sites; also detected in the cytoplasm	V-type ATPase V1 subunit B	H+-transporting ATPase (by homology)	None	None	None	None	None	None	None	None	0.997	0.4	0.386	-0.165	0.501	0.214	0.388	0.607	0.688	0.355	-0.081	0.193	0.043	0.529	-0.072	0.139	-0.115	0.364
162.m02669	CNAG_04437	YNL129W	NRK1	SPBP22H7.06	None	orf19.511	ca4499	IPF11316	KOG3308	F	Uncharacterized protein of the uridine kinase family	conserved hypothetical protein	Nicotinamide riboside kinase, catalyzes the phosphorylation of nicotinamide riboside and nicotinic acid riboside in salvage pathways for NAD+ biosynthesis	nicotinamide riboside kinase (predicted)	unknown function	None	None	None	None	None	None	None	None	0.091	1.265	0.523	-0.322	0.792	0.388	0.116	0.213	0.553	0.154	0.174	0.306	0.204	-0.355	0.316	-0.031	0.61	0.061
162.m02670	CNAG_04440	YOR143C	THI80	SPAC6F12.05c	tnr3	orf19.1110	ca1462	THI80	KOG3153	H	Thiamine pyrophosphokinase	thiamine pyrophosphokinase	Thiamine pyrophosphokinase, phosphorylates thiamine to produce the coenzyme thiamine pyrophosphate (thiamine diphosphate)	thiamine diphosphokinase Tnr3	Thiamin pyrophosphokinase (by homology)	None	None	None	None	None	None	None	None	-0.133	1.021	0.277	-0.358	0.353	0.083	-0.118	-0.247	0.084	0.181	0.053	0.176	0.037	-0.116	-0.239	-0.167	-0.168	-0.162
162.m02671	CNAG_04445	YNL096C	RPS7B	SPAC18G6.14c	rps7	orf19.1700	ca1502	RPS7A	KOG3320	J	40S ribosomal protein S7	40S ribosomal protein S7	Protein component of the small (40S) ribosomal subunit, nearly identical to Rps7Ap; interacts with Kti11p; deletion causes hypersensitivity to zymocin; has similarity to rat S7 and Xenopus S8 ribosomal proteins	40S ribosomal protein S7 (predicted)	ribosomal protein (by homology)	None	None	None	None	None	Cne_OxR-dw_2.0	None	Cne_OxSR-dw_2.0	0.189	0.966	0.507	-0.234	0.214	-0.02	-0.057	-0.314	0.011	0.106	0.261	0.287	-0.072	-0.448	-0.2	-0.04	0.062	0.024
162.m02673	CNAG_04452	None	None	None	None	None	None	None	KOG3162	J	Mitochondrial/chloroplast ribosomal protein S18	30S ribosomal protein S18	None	None	None	None	None	None	None	None	Cne_OxR-dw_2.0	None	Cne_OxSR-dw_2.0	0.079	0.675	0.552	-0.464	0.653	-0.017	0.168	0.323	0.341	0.134	0.511	0.479	0.171	-0.237	-0.095	-0.005	-0.331	-0.085
162.m02675	CNAG_04455	None	None	None	None	None	None	None	None	None	None	peroxisomal protein	None	None	None	None	None	None	None	None	None	None	None	0.348	0.669	0.243	-0.3	0.688	0.114	-0.16	0.24	0.241	0.156	0.184	0.251	-0.093	-0.378	0.006	-0.148	0.131	0.264
162.m02676	CNAG_04459	None	None	None	None	None	None	None	None	None	None	hypothetical protein	None	None	None	None	None	None	None	None	None	None	None	0.119	-0.729	-0.438	-0.927	1.091	0.357	0.321	0.264	0.577	0.216	1.144	-0.482	0.341	-0.326	-0.168	0.27	-0.149	0.731
162.m02677	CNAG_04460	None	None	SPAC1071.06	arp9	None	None	None	KOG0676	Z	Actin and related proteins	RNA polymerase II transcription factor	None	SWI/SNF and RSC complex subunit Arp9	None	None	None	None	None	None	None	None	None	-0.106	1.079	0.364	-0.341	0.322	0.043	-0.172	-0.225	0.135	0.144	0.084	0.248	0.028	-0.174	-0.054	-0.151	-0.16	-0.201
162.m02678	CNAG_04461	YGL251C	HFM1	None	None	orf19.810	ca4212	HFM1	KOG0952	A	DNA/RNA helicase MER3/SLH1, DEAD-box superfamily	DNA helicase	Meiosis specific DNA helicase involved in the conversion of double-stranded breaks to later recombination intermediates and in crossover control; catalyzes the unwinding of Holliday junctions; has ssDNA and dsDNA stimulated ATPase activity	None	DNA/RNA helicase by homology	None	None	None	None	None	None	None	None	-0.055	1.341	0.651	-0.312	0.58	0.205	0.072	-0.265	0.439	0.133	0.407	0.389	0.213	-0.677	0.055	-0.021	0.276	-0.054
162.m02680	CNAG_04465	YDL087C	LUC7	SPCC16A11.13	usp106	orf19.3116	ca4395	EXM2	KOG0796	A	Spliceosome subunit	small nuclear ribonucleoprotein	Essential protein associated with the U1 snRNP complex; splicing factor involved in recognition of 5' splice site; contains two zinc finger motifs; N-terminal zinc finger binds pre-mRNA	U1 snRNP-associated protein Usp106	EXit from Mitosis (by homology)	None	None	None	None	None	None	None	None	-0.129	0.932	0.378	-0.411	0.422	0.007	-0.08	-0.151	0.062	0.139	0.066	0.22	0.007	-0.16	-0.152	-0.137	-0.065	-0.229
162.m02681	CNAG_04468	None	None	None	None	None	None	None	KOG0786	E	3-isopropylmalate dehydrogenase	tartrate dehydrogenase	None	None	None	None	Cne_OsR-dw_2.0	None	None	None	None	None	Cne_OsSR-dw_2.0	-0.008	1.252	0.501	-0.252	0.644	0.179	0.077	-0.235	0.339	0.088	0.412	0.487	0.201	-0.637	0	0.016	0.213	-0.066
162.m02682	CNAG_04470	None	None	None	None	None	None	None	KOG2914	R	Predicted haloacid-halidohydrolase and related hydrolases	haloacid dehalogenase	None	None	None	None	None	None	None	None	None	None	None	0.088	1.125	0.697	-0.329	0.968	0.123	0.111	0.57	0.473	0.153	0.197	0.444	0.208	-0.482	0.14	0.023	0.677	-0.009
162.m02683	CNAG_04472	None	None	None	None	None	None	None	KOG3098	S	Uncharacterized conserved protein	membrane protein	None	None	None	None	None	None	None	None	None	None	None	-0.306	1.246	0.466	-0.419	0.369	0.088	0	-0.062	0.24	0.111	0.075	0.412	0.089	-0.229	-0.186	-0.154	-0.039	-0.236
162.m02685	CNAG_04433	YJL141C	YAK1	SPAC2F7.03c	pom1	orf19.5253	ca4995	IPF2032	KOG0667	R	Dual-specificity tyrosine-phosphorylation regulated kinase	CMGC/DYRK/DYRK2 protein kinase	Serine-threonine protein kinase that is part of a glucose-sensing system involved in growth control in response to glucose availability; translocates from the cytoplasm to the nucleus and phosphorylates Pop2p in response to a glucose signal	DYRK family protein kinase Pom1	Ser/thr protein kinase (by homology)	None	None	None	None	None	None	None	None	0.029	1.037	0.317	-0.258	0.504	0.056	0.015	-0.118	0.282	0.143	0.351	0.175	0.139	-0.672	-0.185	-0.107	0.056	0.015
162.m02687	CNAG_07769	YDR457W	TOM1	SPAC19D5.04	ptr1	orf19.5776	ca2803	IPF11711	KOG0939	OK	E3 ubiquitin-protein ligase/Putative upstream regulatory element binding protein	E3 ubiquitin-protein ligase	E3 ubiquitin ligase of the hect-domain class; has a role in mRNA export from the nucleus and may regulate transcriptional coactivators	HECT domain	ubiquitin-protein ligase (by homology)	None	None	None	None	None	None	None	None	-0.01	0.743	-0.018	-0.274	0.281	0.041	-0.088	-0.042	0.13	0.134	0.118	0.116	-0.049	-0.271	-0.2	-0.153	-0.289	-0.165
162.m02692	CNAG_04416	None	None	None	None	orf19.4779	ca0778	IPF12884	KOG0254	R	Predicted transporter (major facilitator superfamily)	major facilitator superfamily transporter	None	None	unknown function	None	None	None	None	Cne_OxR-up_2.0	None	Cne_OxSR-up_2.0	None	-0.199	1.161	0.607	-0.359	0.667	0.242	0.004	-0.382	0.447	0.227	0.407	0.26	0.132	0.378	-0.222	-0.001	0.632	0.126
162.m02693	CNAG_04417	None	None	None	None	None	None	None	None	None	None	2,4-dichlorophenoxyacetate alpha-ketoglutarate dioxygenase	None	None	None	None	None	None	None	None	None	None	None	-0.051	0.869	0.403	-0.43	0.67	0.148	0.281	0.311	-0.117	0.104	0.758	-0.123	0.311	-0.431	0.108	0.03	-0.75	-0.183
162.m02698	CNAG_04415	None	None	None	None	None	None	None	KOG1577	R	Aldo/keto reductase family proteins	oxidoreductase	None	None	None	None	None	None	None	None	None	None	None	0.156	0.867	0.496	-0.229	0.566	-0.025	0.143	0.318	0.45	0.113	0.188	0.245	0.095	-0.44	-0.324	0.027	0.285	-0.022
162.m02699	CNAG_04414	YBR293W	VBA2	SPBC12C2.13c	fnx1	None	None	None	KOG0254	R	Predicted transporter (major facilitator superfamily)	multidrug resistance protein fnx1	Permease of basic amino acids in the vacuolar membrane	MFS multidrug efflux transporter	None	None	None	None	None	None	None	None	None	-0.194	1.051	0.056	-0.371	0.454	0.227	0.06	-0.225	0.152	0.032	0.045	0.201	0.08	0.065	-0.17	-0.13	0.291	-0.199
162.m02702	CNAG_04412	None	None	None	None	None	None	None	KOG0958	L	DNA damage-responsive repressor GIS1/RPH1, jumonji superfamily	conserved hypothetical protein	None	None	None	None	None	None	None	None	None	None	None	0.029	1.2	0.498	-0.437	0.802	0.195	0.273	0.337	0.223	0.124	0.737	0.31	0.349	-0.342	0.071	0.02	-0.463	-0.128
162.m02704	CNAG_04407	YDR488C	PAC11	SPBC646.17c	dic1	orf19.7632	ca6027	IPF609	KOG1587	Z	Cytoplasmic dynein intermediate chain	dynein intermediate chain	Dynein intermediate chain, acts in the cytoplasmic dynein pathway, forms cortical cytoplasmic microtubule capture site with Num1p; null mutant is defective in nuclear migration, essential in the absence of CIN8	dynein intermediate chain Dic1	unknown function	None	None	None	None	None	None	None	None	-0.161	1.272	0.506	-0.316	0.817	0.256	-0.001	-0.333	0.401	0.217	0.356	0.244	0.232	0.336	-0.019	0.001	0.622	0.229
162.m02705	CNAG_04405	YPR025C	CCL1	SPBP16F5.02	mcs2	orf19.4542	ca4200	CCL1	KOG2496	DKL	Cdk activating kinase (CAK)/RNA polymerase II transcription initiation/nucleotide excision repair factor TFIIH/TFIIK, cyclin H subunit	cyclin-dependent protein kinase regulator	Cyclin associated with protein kinase Kin28p, which is the TFIIH-associated carboxy-terminal domain (CTD) kinase involved in transcription initiation at RNA polymerase II promoters	cyclin Mcs2	cyclin (by homology)	None	None	None	None	None	None	None	None	-0.222	0.996	0.356	-0.354	0.52	0.23	0.077	-0.182	0.264	0.046	0.034	0.201	0.13	0.113	-0.208	-0.149	0.392	-0.209
162.m02707	CNAG_04401	YBL050W	SEC17	SPAC959.02	sec17	orf19.2518	ca0460	SEC17	KOG1586	U	Protein required for fusion of vesicles in vesicular transport, alpha-SNAP	vesicular-fusion protein	Peripheral membrane protein required for vesicular transport between ER and Golgi and for the 'priming' step in homotypic vacuole fusion, part of the cis-SNARE complex; has similarity to alpha-SNAP	alpha SNAP (predicted)	transport vesicle fusion protein (by homology)	None	None	None	None	None	None	None	None	0.277	0.497	0.456	-0.235	0.615	-0.041	0.113	0.317	0.323	0.155	0.114	0.173	0.082	-0.296	-0.166	-0.032	0.281	0.042
162.m02708	CNAG_04399	YBL036C	None	SPAC644.09	None	orf19.2794	ca2002	IPF16470	KOG3157	R	Proline synthetase co-transcribed protein	alanine racemase domain-containing protein	None	alanine racemase (predicted)	unknown function	None	None	None	None	None	None	None	None	<no data>	0	-0.433	2.051	<no data>	-1.918	-1	<no data>	<no data>	<no data>	2.907	-0.83	3.585	<no data>	-0.415	0	<no data>	-1.415
162.m02710	CNAG_04395	YDR299W	BFR2	SPAC664.08c	None	orf19.7624	ca6021	BFR2	KOG2773	KU	Apoptosis antagonizing transcription factor/protein transport protein	conserved hypothetical protein	Essential protein possibly involved in secretion; multicopy suppressor of sensitivity to Brefeldin A	traub transciption factor family protein (predicted)	involved in protein transport steps at the Brefeldin A block (by homology)	None	None	None	None	None	None	None	None	-0.205	1.211	0.615	-0.324	0.81	0.191	0.023	-0.303	0.352	0.241	0.427	0.195	0.216	0.395	-0.247	-0.055	0.743	0.115
162.m02712	CNAG_04393	None	None	None	None	None	None	None	KOG0952	A	DNA/RNA helicase MER3/SLH1, DEAD-box superfamily	RNA helicase	None	None	None	None	None	None	None	None	None	None	None	-0.258	0.958	0.279	-0.392	0.622	0.3	0.056	-0.242	0.135	0.036	0.007	0.389	0.145	0.032	-0.137	-0.113	0.468	-0.013
162.m02715	CNAG_04387	YPR082C	DIB1	SPCC16A11.05c	dim1	orf19.1975	ca0468	DIB1	KOG3414	AD	Component of the U4/U6.U5 snRNP/mitosis protein DIM1	pre-mRNA splicing factor	17-kDa component of the U4/U6aU5 tri-snRNP, plays an essential role in pre-mRNA splicing, orthologue of hDIM1, the human U5-specific 15-kDa protein	U4/U6 x U5 tri-snRNP complex subunit Dim1	Component of the U4/U6.U5 snRNP (by homology)	None	Cne_OsR-dw_2.0	None	None	None	None	None	Cne_OsSR-dw_2.0	-0.051	0.797	0.082	-0.351	0.802	0.588	0.103	0.108	-0.468	0.307	0.766	0.003	0.369	0.567	0.625	0.033	-0.253	0.121
162.m02716	CNAG_04383	None	None	None	None	orf19.490	ca4515	IPF16652	KOG3138	R	Predicted N-acetyltransferase	acetyltransferase	None	None	unknown function	None	None	None	None	None	Cne_OxR-dw_2.0	None	Cne_OxSR-dw_2.0	-0.017	1.09	0.494	-0.297	0.752	0.132	0.022	-0.275	0.306	0.191	0.399	0.258	0.167	0.263	-0.096	-0.125	0.662	0.12
162.m02717	CNAG_04381	YLR005W	SSL1	SPCC1682.07	ssl1	orf19.1457	ca4545	SSL1	KOG2807	KL	RNA polymerase II transcription initiation/nucleotide excision repair factor TFIIH, subunit SSL1	RNA polymerase II transcription factor	Component of the core form of RNA polymerase transcription factor TFIIH, which has both protein kinase and DNA-dependent ATPase/helicase activities and is essential for transcription and nucleotide excision repair; interacts with Tfb4p	transcription factor TFIIH complex subunit Ssl1	TFIIH subunit (transcription initiation factor), factor B	None	None	Cne_FxR-up_2.0	None	None	None	Cne_FxSR-up_2.0	None	0.005	1.053	0.468	-0.335	0.699	0.266	0.289	0.077	0.509	0.071	-0.009	0.217	0.389	0.458	0.004	0.048	0.658	0.13
162.m02718	CNAG_04375	YBR003W	COQ1	SPBPJ4664.01	dps1	orf19.7478	ca5823	COQ1	KOG0776	H	Geranylgeranyl pyrophosphate synthase/Polyprenyl synthetase	trans-hexaprenyltranstransferase	Hexaprenyl pyrophosphate synthetase, catalyzes the first step in ubiquinone (coenzyme Q) biosynthesis	decaprenyl diphosphate synthase subunit Dps1	Hexaprenyl pyrophosphate synthetase (by homology)	None	None	None	None	None	None	None	None	0.36	1.041	0.59	-0.28	0.139	0.158	0.083	0.319	-0.356	0.159	0.551	0.46	0.268	0.489	0.269	0.108	0.591	0.245
162.m02719	CNAG_04373	None	None	None	None	None	None	None	None	None	None	alginate lyase	None	None	None	None	None	None	None	None	None	None	None	0.497	0.269	-0.046	-0.176	0.348	0.215	-0.115	0.262	0.436	0.041	0.072	-0.152	-0.282	0.297	-0.04	-0.113	0.153	0.359
162.m02720	CNAG_04372	YPR187W	RPO26	SPCC1020.04c	rpb6	orf19.2643	ca2066	RPO26	KOG3405	K	RNA polymerase subunit K	DNA-directed RNA polymerase I	RNA polymerase subunit ABC23, common to RNA polymerases I, II, and III; part of central core; similar to bacterial omega subunit	DNA-directed RNA polymerase I, II and III subunit Rpb6	DNA-directed RNA polymerase I, II, III 18 KD subunit (by homology)	None	None	None	None	None	Cne_OxR-dw_2.0	None	Cne_OxSR-dw_2.0	-0.176	0.884	0.217	-0.42	0.579	0.113	0.005	-0.209	0.144	0.043	0.013	0.144	0.051	0.068	-0.468	-0.215	0.175	-0.101
162.m02721	CNAG_04376	None	None	SPAC22G7.05	None	None	None	None	KOG2409	J	KRR1-interacting protein involved in 40S ribosome biogenesis	conserved hypothetical protein	None	krr family protein	None	None	None	None	None	None	None	None	None	-0.069	0.509	0.237	-0.404	0.304	-0.016	-0.143	-0.39	-0.066	-0.027	0.426	0.031	-0.169	0.232	-0.719	-0.157	0.213	0.079
162.m02722	CNAG_04378	None	None	None	None	None	None	None	KOG3300	CD	NADH:ubiquinone oxidoreductase, B16.6 subunit/cell death-regulatory protein	NADH:ubiquinone oxidoreductase 14kD subunit	None	None	None	None	None	None	None	None	None	None	None	0.488	0.615	0.448	-0.261	0.183	0.02	0.072	0.121	-0.401	0.2	0.412	0.237	0.146	0.435	-0.042	0.064	0.182	0.216
162.m02724	CNAG_04380	None	None	None	None	None	None	None	KOG1339	O	Aspartyl protease	peptidase	None	None	None	None	None	None	None	Cne_OxR-up_2.0	None	Cne_OxSR-up_2.0	None	-0.046	0.324	-0.205	-0.296	0.562	-0.088	-0.143	0.059	-0.039	0.071	0.031	-0.29	-0.237	0.11	-0.547	-0.344	-0.035	0.056
162.m02725	CNAG_04384	YBL057C	PTH2	SPAC19A8.14	None	orf19.2544	ca1057	IPF17031	KOG3282	S	Uncharacterized conserved protein	aminoacyl-tRNA hydrolase	One of two (see also PTH1) mitochondrially-localized peptidyl-tRNA hydrolases; negatively regulates the ubiquitin-proteasome pathway via interactions with ubiquitin-like ubiquitin-associated proteins; dispensable for cell growth	aminoacyl-tRNA hydrolase (predicted)	unknown function	None	None	None	None	None	Cne_OxR-dw_2.0	None	Cne_OxSR-dw_2.0	0.106	1.111	0.957	-0.252	0.452	0.278	0.185	0.032	-0.42	0.15	0.576	0.416	0.353	0.472	0.129	0.202	0.401	0.149
162.m02726	CNAG_04388	YHR008C	SOD2	SPAC1486.01	None	orf19.7111.1	None	None	KOG0876	P	Manganese superoxide dismutase	mitochondrial superoxide dismutase Sod2	Mitochondrial superoxide dismutase, protects cells against oxygen toxicity; phosphorylated	manganese superoxide dismutase (AF069292)	None	None	None	None	None	None	None	None	None	-0.071	-0.179	-0.431	-0.717	1.222	0.587	0.001	-0.282	-0.037	0.111	0.061	-0.302	0.641	0.471	0.353	-0.14	0.002	-0.025
162.m02727	CNAG_07765	None	None	None	None	None	None	None	None	None	None	bli-3 protein	None	None	None	None	None	None	None	None	None	None	None	-0.174	0.206	-0.123	-0.415	0.849	0.5	0.065	-0.23	0.361	0.237	0.535	-0.382	0.38	0.064	-0.342	0.092	0.266	0.418
162.m02730	CNAG_04392	None	None	None	None	orf19.1709	ca1558	IPF15679	None	None	None	sterol-binding protein	None	None	lipid transfer protein (by homology)	None	None	None	None	None	None	None	None	0.016	0.381	-0.407	-0.218	0.223	0.005	-0.391	-0.004	-0.204	0.102	0.058	-0.361	-0.356	0.127	-0.567	-0.406	-0.158	-0.071
162.m02733	CNAG_04396	YCL012C	None	SPAC1687.07	None	orf19.7078	ca5620	IPF511	None	None	None	Aycl012	None	conserved fungal protein	unknown function	None	None	None	None	Cne_OxR-up_2.0	None	Cne_OxSR-up_2.0	None	0.087	0.749	0.393	-0.291	0.515	0.405	-0.144	0.065	0.134	0.19	0.59	0.284	0.165	0.251	0.055	-0.02	0.105	0.592
162.m02736	CNAG_04400	YDR041W	RSM10	SPBC211.01	rsm10	orf19.6752	ca5945	IPF3492	KOG3321	J	Mitochondrial ribosomal protein S10	mitochondrial ribosomal protein	Mitochondrial ribosomal protein of the small subunit, has similarity to E. coli S10 ribosomal protein; essential for viability, unlike most other mitoribosomal proteins	mitochondrial ribosomal protein subunit S10	unknown function	None	None	None	None	None	Cne_OxR-dw_2.0	None	Cne_OxSR-dw_2.0	-0.217	1.107	0.331	-0.361	0.733	0.23	0.099	-0.01	0.287	0.132	-0.007	0.305	0.294	0.161	-0.131	-0.09	0.446	-0.112
162.m02737	CNAG_04402	None	None	SPAP8A3.06	None	orf19.4062	ca1486	IPF10521	KOG2202	A	U2 snRNP splicing factor, small subunit, and related proteins	splicing factor	None	U2AF small subunit, U2AF-23	unknown function	None	None	None	None	None	None	None	None	-0.074	1.317	0.606	-0.311	0.557	-0.029	0.066	-0.152	0.307	0.142	0.452	0.241	0.062	-0.732	0.066	-0.011	0.155	-0.058
162.m02738	None	None	None	None	None	None	None	None	None	None	None	None	None	None	None	None	None	None	None	None	None	None	None	0.098	0.724	0.402	-0.217	0.636	0.318	0.24	0.294	0.487	0.102	0.013	0.112	0.102	0.505	0.085	0.078	0.891	0.134
162.m02739	CNAG_04371	None	None	None	None	None	None	None	KOG2111	S	Uncharacterized conserved protein, contains WD40 repeats	conserved hypothetical protein	None	None	None	None	None	None	None	Cne_OxR-up_2.0	None	Cne_OxSR-up_2.0	None	0.011	0.931	0.304	-0.296	0.72	0.284	0.127	0.092	-0.192	0.189	0.684	0.221	0.129	0.292	0.039	0.042	0.279	0.18
162.m02741	CNAG_04365	YDR060W	MAK21	SPAC4F10.09c	None	orf19.5912	ca6134	MAK21	KOG2038	JK	CAATT-binding transcription factor/60S ribosomal subunit biogenesis protein	ribosome biogenesis protein	Constituent of 66S pre-ribosomal particles, required for large (60S) ribosomal subunit biogenesis; involved in nuclear export of pre-ribosomes; required for maintenance of dsRNA virus; homolog of human CAATT-binding protein	ribosome biogenesis protein Noc1 (predicted)	Ribosome biogenesis protein (by homology)	None	None	None	None	None	Cne_OxR-dw_2.0	None	Cne_OxSR-dw_2.0	-0.304	1.073	0.397	-0.351	0.395	0.072	-0.06	0.005	0.082	0.11	0.08	0.33	0.021	-0.267	-0.185	-0.11	-0.111	-0.295
162.m02743	CNAG_04358	YMR301C	ATM1	SPAC15A10.01	atm1	orf19.1077	ca0933	ATM1	KOG0057	U	Mitochondrial Fe/S cluster exporter, ABC superfamily	iron-sulfur clusters transporter ATM1	Mitochondrial inner membrane ATP-binding cassette (ABC) transporter, exports mitochondrially synthesized precursors of iron-sulfur (Fe/S) clusters to the cytosol	ABC family iron transporter Atm1	ATP-binding cassette transporter (by homology)	None	None	Cne_FxR-up_2.0	None	None	None	Cne_FxSR-up_2.0	None	0.046	1.048	0.369	-0.216	0.59	0.098	0.015	-0.113	0.446	0.134	0.425	0.216	0.102	-0.685	-0.15	-0.029	0.268	0.048
162.m02745	CNAG_04352	None	None	SPAC144.02	None	orf19.2961	ca4172	IPF4432	KOG1721	R	1 FOG: Zn-finger	zinc-finger protein	None	transcription factor (predicted)	unknown function	None	None	None	None	None	None	None	None	-0.188	0.945	0.422	-0.286	0.916	0.429	0.254	0.377	-0.294	0.101	0.031	0.327	0.42	0.47	0.079	-0.052	0.758	0.053
162.m02746	CNAG_04348	YKR092C	SRP40	SPBC1711.05	None	orf19.2859	ca1666	SRP40	KOG2992	Y	Nucleolar GTPase/ATPase p130	chaperone	Nucleolar, serine-rich protein with a role in preribosome assembly or transport; may function as a chaperone of small nucleolar ribonucleoprotein particles (snoRNPs); immunologically and structurally to rat Nopp140	nucleocytoplasmic transport chaperone Srp40 (predicted)	RNA I and II supressor (by homology)	None	None	None	None	None	None	None	None	0.342	0.281	0.124	-0.303	0.801	-0.026	-0.261	0.116	0.444	0.11	0.401	0.141	0.427	-0.394	0.005	-0.203	0.159	0.656
162.m02749	CNAG_04343	None	None	None	None	None	None	None	KOG2533	G	Permease of the major facilitator superfamily	nicotinamide mononucleotide permease	None	None	None	None	None	None	None	None	None	None	None	-0.023	1.143	0.659	-0.335	0.757	0.237	0.125	0.215	0.471	0.287	-0.027	0.461	0.331	0.032	0.146	0.053	0.259	-0.222
162.m02752	CNAG_04340	None	None	None	None	None	None	None	KOG0533	A	RRM motif-containing protein	conserved hypothetical protein	None	None	None	None	None	None	None	None	None	None	None	0.373	0.83	0.725	-0.237	0.436	-0.021	0.069	0.188	0.027	0.15	0.583	0.438	0.405	-0.463	0.255	0.088	-0.042	0.245
162.m02753	CNAG_04340	None	None	None	None	None	None	None	KOG0533	A	RRM motif-containing protein	conserved hypothetical protein	None	None	None	None	None	None	None	None	None	None	None	0.369	0.92	0.433	-0.252	0.829	0.063	0.01	0.244	0.257	0.306	-0.005	0.294	-0.046	-0.187	-0.015	-0.117	0.155	-0.236
162.m02759	CNAG_04344	None	None	None	None	None	None	None	None	None	None	mandelate racemase/muconate lactonizing enzyme	None	None	None	None	None	None	None	None	None	None	None	-0.207	1.253	0.385	-0.335	0.481	0.191	-0.048	0.022	0.032	0.115	0.084	0.293	0.164	-0.299	-0.15	-0.134	-0.026	-0.284
162.m02760	CNAG_04346	None	None	None	None	None	None	None	None	None	None	dihydrodipicolinate synthase	None	None	None	None	None	None	None	None	None	None	None	0.057	1.009	0.388	-0.282	0.467	0.046	-0.049	-0.097	0.227	0.159	0.456	0.226	0.153	-0.695	-0.167	-0.05	-0.069	-0.11
162.m02761	CNAG_04347	YER052C	HOM3	SPBC19F5.04	None	orf19.1235	ca2977	HOM3	KOG0456	E	Aspartate kinase	aspartate kinase	Aspartate kinase (L-aspartate 4-P-transferase); cytoplasmic enzyme that catalyzes the first step in the common pathway for methionine and threonine biosynthesis; expression regulated by Gcn4p and the general control of amino acid synthesis	aspartate kinase (predicted)	Aspartokinase (by homology)	None	None	None	None	Cne_OxR-up_2.0	None	Cne_OxSR-up_2.0	None	-0.213	1.046	0.449	-0.354	0.295	0.121	-0.045	0.026	-0.003	0.123	0.068	0.189	0.049	-0.306	-0.255	-0.188	-0.189	-0.296
162.m02764	CNAG_04351	None	None	None	None	None	None	None	KOG2449	EG	Methylmalonate semialdehyde dehydrogenase	methylmalonate-semialdehyde dehydrogenase	None	None	None	None	None	None	None	None	None	None	None	0.058	0.99	0.344	-0.278	0.55	-0.093	0.007	-0.045	0.329	0.113	0.435	0.169	0.089	-0.705	-0.258	0.046	0.054	-0.073
162.m02765	CNAG_04354	YHR201C	PPX1	SPAC2F3.11	None	orf19.4107	ca4315	PPX1	KOG4129	C	Exopolyphosphatases and related proteins	exopolyphosphatase	Exopolyphosphatase, hydrolyzes inorganic polyphosphate (poly P) into Pi residues; located in the cytosol, plasma membrane, and mitochondrial matrix	exopolyphosphatase (predicted)	Exopolyphosphatase (by homology)	None	None	None	None	Cne_OxR-up_2.0	None	Cne_OxSR-up_2.0	None	-0.003	0.762	-0.066	-0.409	0.217	0.056	-0.095	-0.169	0.111	0.147	0.124	0.064	0.03	-0.366	-0.098	-0.021	-0.191	-0.266
162.m02766	CNAG_04356	YNL313C	None	SPAC19B12.01	None	orf19.5356	ca5510	IPF741	KOG1128	R	Uncharacterized conserved protein, contains TPR repeats	TPR repeat-containing protein	None	TPR repeat protein, TTC27 family	unknown function	None	None	None	None	None	None	None	None	0.004	1.302	0.508	-0.303	0.622	0.081	0.109	-0.103	0.421	0.143	0.453	0.407	0.232	-0.734	0.22	0.059	0.227	-0.038
162.m02767	CNAG_04362	YOR046C	DBP5	SPBC12C2.06	None	orf19.1661	ca3464	DBP5	KOG0332	A	ATP-dependent RNA helicase	ATP-dependent RNA helicase DBP5	Cytoplasmic ATP-dependent RNA helicase of the DEAD-box family involved in mRNA export from the nucleus; involved in translation termination	ATP-dependent RNA helicase Dbp5	RNA helicase (by homology)	None	None	None	None	None	None	None	None	0.038	0.825	0.213	-0.294	0.323	0.119	-0.124	-0.105	-0.11	0.105	0.102	0.207	-0.032	-0.368	-0.195	-0.143	-0.401	-0.253
162.m02769	CNAG_04364	YGL022W	STT3	SPBC1271.02	stt3	orf19.1478	ca4528	STT3	KOG2292	O	Oligosaccharyltransferase, STT3 subunit	oligosaccharyl transferase stt3 subunit	Subunit of the oligosaccharyltransferase complex of the ER lumen, which catalyzes asparagine-linked glycosylation of newly synthesized proteins; forms a subcomplex with Ost3p and Ost4p and is directly involved in catalysis	oligosaccharyltransferase subunit Stt3	oligosaccharyl transferase (by homology)	None	None	None	None	None	None	None	None	0.14	1.112	0.473	-0.243	0.483	-0.067	0.039	-0.116	0.248	0.157	0.35	0.184	0.086	-0.63	-0.048	0.083	0.067	0.002
162.m02770	CNAG_04368	None	None	None	None	None	None	None	KOG2950	R	Uncharacterized protein involved in protein-protein interaction, contains polyproline-binding GYF domain	conserved hypothetical protein	None	None	None	None	None	None	None	None	None	None	None	-0.099	0.963	0.302	-0.282	0.46	0.127	-0.167	-0.18	-0.01	0.106	0.106	0.215	0.039	-0.372	-0.165	-0.194	-0.325	-0.328
162.m02771	CNAG_04370	YJL109C	UTP10	SPBC23E6.04c	utp10	orf19.7215	ca5340	IPF883	KOG1837	S	Uncharacterized conserved protein	U3 small nucleolar RNA-associated protein 10	Nucleolar protein, component of the small subunit (SSU) processome containing the U3 snoRNA that is involved in processing of pre-18S rRNA	U3 snoRNP-associated protein Utp10 (predicted)	unknown function	None	None	None	None	None	Cne_OxR-dw_2.0	None	Cne_OxSR-dw_2.0	-0.156	0.672	0.099	-0.177	0.665	0.177	-0.071	0.125	0.097	0.038	0.173	0.18	0.033	0.206	-0.392	-0.137	0.188	0.147
162.m02772	CNAG_04334	YNL306W	MRPS18	SPAC1B3.18c	mrps18	orf19.688	ca1976	IPF9582	None	None	None	conserved hypothetical protein	Mitochondrial ribosomal protein of the small subunit; essential for viability, unlike most other mitoribosomal proteins	mitochondrial ribosomal protein subunit S18	similar to Saccharomyces cerevisiae Mrps18p ribosomal protein of the small subunit, mitochondrial (by homology)	Cne_OsR-up_2.0	None	None	None	None	None	Cne_OsSR-up_2.0	None	-0.161	0.532	0.162	-0.421	0.596	0.167	0.22	-0.004	0.203	-0.068	-0.051	0.19	0.37	0.406	-0.209	0.149	-0.114	0.097
162.m02773	CNAG_04332	YKL138C	MRPL31	SPCC16A11.11	mrpl31	orf19.1485	ca0908	MRPL31	None	None	None	60s ribosomal protein l31	Mitochondrial ribosomal protein of the large subunit	mitochondrial ribosomal protein subunit L31	Mitochondrial ribosomal protein	None	None	None	None	None	Cne_OxR-dw_2.0	None	Cne_OxSR-dw_2.0	0.315	1.004	0.699	-0.161	0.476	-0.016	0.226	0.256	-0.288	0.166	0.466	0.418	0.231	-0.35	0.075	0.199	-0.203	0.131
162.m02774	CNAG_04328	YDL064W	UBC9	SPAC30D11.13	hus5	orf19.6424	ca5109	UBC9	KOG0424	O	Ubiquitin-protein ligase	ubiquitin-conjugating enzyme e2-18 kda	SUMO-conjugating enzyme involved in the Smt3p conjugation pathway; nuclear protein required for S- and M-phase cyclin degradation and mitotic control; involved in proteolysis mediated by the anaphase-promoting complex cyclosome (APCC)	SUMO conjugating enzyme Hus5	E2 ubiquitin-conjugating enzyme (by homology)	None	None	None	None	None	None	None	None	0.351	0.506	0.425	-0.249	0.631	-0.033	0.088	0.402	0.104	0.303	0.043	0.219	-0.061	-0.103	-0.036	-0.063	-0.101	-0.254
162.m02775	CNAG_04327	YJL080C	SCP160	SPCC550.14	vgl1	orf19.5281	ca4971	IPF4697	KOG2208	I	Vigilin	SCP160 protein	Essential RNA-binding G protein effector of mating response pathway, mainly associated with nuclear envelope and ER, interacts in mRNA-dependent manner with translating ribosomes via multiple KH domains, similar to vertebrate vigilins	vigilin (predicted)	similar to Saccharomyces cerevisiae Scp160p required for maintenance of exact ploidy (by homology)	None	None	None	None	None	None	None	None	0.328	0.856	0.667	-0.22	0.223	-0.1	0.174	0.313	-0.16	0.108	0.261	0.336	-0.099	-0.248	-0.004	0.108	-0.05	0.344
162.m02777	CNAG_04326	YKL029C	MAE1	SPCC794.12c	mae2	orf19.3419	ca3757	MAE1	KOG1257	C	NADP+-dependent malic enzyme	nad-dependent malic enzyme	Mitochondrial malic enzyme, catalyzes the oxidative decarboxylation of malate to pyruvate, which is a key intermediate in sugar metabolism and a precursor for synthesis of several amino acids	malic enzyme	mitochondrial malic enzyme (by homology)	None	Cne_OsR-dw_2.0	None	None	None	Cne_OxR-dw_2.0	None	None	-0.183	0.727	-0.161	-0.376	1	0.449	0.308	0.271	0.619	0.041	0.188	-0.125	0.5	0.236	-0.251	0.099	0.45	0.264
162.m02779	CNAG_04320	None	None	None	None	None	None	None	KOG2571	M	Chitin synthase/hyaluronan synthase (glycosyltransferases)	polysaccharide synthase Cps1p	None	None	None	None	None	None	None	None	None	None	None	0.258	-0.091	-0.096	-0.39	0.563	0.236	-0.049	0.039	0.167	-0.075	-0.035	-0.188	-0.066	0.209	-0.212	-0.018	-0.271	0.182
162.m02782	CNAG_04310	YDR061W	None	SPAC323.04	None	orf19.5029	ca5235	IPF3015	KOG0927	R	Predicted transporter (ABC superfamily)	conserved hypothetical protein	None	mitochondrial ATPase (predicted)	Similar to E.coli modF and photorepair protein phrA	None	None	None	None	Cne_OxR-up_2.0	None	Cne_OxSR-up_2.0	None	-0.232	1.169	0.354	-0.177	0.913	0.295	0.158	-0.174	0.403	0.007	0.132	0.396	0.543	0.244	-0.168	-0.067	0.662	0.088
162.m02783	CNAG_04307	None	None	SPCC1223.09	None	orf19.2114	ca2731	URIC	KOG1599	Q	Uricase (urate oxidase)	uricase	None	uricase (predicted)	uricase (urate oxidase) (by homology)	Cne_OsR-up_2.0	None	None	None	None	None	Cne_OsSR-up_2.0	None	-0.3	-0.371	-0.402	-0.182	0.412	0.202	-0.167	0.693	-0.146	0.293	0.086	-0.305	-0.879	-0.469	-1.171	-0.615	-1.01	-0.277
162.m02784	CNAG_04306	None	None	None	None	None	None	None	KOG2887	U	Membrane protein involved in ER to Golgi transport	vesicle transport protein SFT2B	None	None	None	None	None	None	None	None	None	None	None	-0.313	0.384	-0.104	-0.498	0.47	0.123	0.204	-0.018	0.092	-0.11	-0.062	-0.203	0.295	0.437	-0.361	0.14	-0.138	0.089
162.m02785	CNAG_04304	YDR188W	CCT6	SPBC646.11	cct6	orf19.3126	ca4385	CCT6	KOG0359	O	Chaperonin complex component, TCP-1 zeta subunit (CCT6)	complex protein 1	Subunit of the cytosolic chaperonin Cct ring complex, related to Tcp1p, essential protein that is required for the assembly of actin and tubulins in vivo; contains an ATP-binding motif	chaperonin-containing T-complex zeta subunit Cct6	component of chaperonin-containing T-complex (zeta subunit)(by homology)	None	None	None	None	None	Cne_OxR-dw_2.0	None	Cne_OxSR-dw_2.0	-0.134	0.87	0.199	-0.114	0.297	-0.118	0.063	-0.011	0.095	0.038	0.152	0.049	0.216	0.157	-0.318	-0.037	0.523	0.024
162.m02787	CNAG_04302	None	None	None	None	None	None	None	KOG1853	Z	LIS1-interacting protein NUDE	conserved hypothetical protein	None	None	None	None	None	None	None	None	None	None	None	-0.34	1.061	-0.058	-0.503	0.414	0.288	0.294	0.074	0.467	-0.032	-0.113	0.133	0.666	0.447	-0.069	0.265	0.002	0.064
162.m02788	CNAG_04298	YLR002C	NOC3	SPBC887.03c	noc3	orf19.7197	ca5323	IPF2142	KOG2153	JU	Protein involved in the nuclear export of pre-ribosomes	AD24	Protein that forms a nuclear complex with Noc2p that binds to 66S ribosomal precursors to mediate their intranuclear transport; also binds to chromatin to promote the association of DNA replication factors and replication initiation	Noc2p-Noc3p complex subunit Noc3 (predicted)	unknown function	None	None	None	None	None	None	None	None	-0.228	1.209	0.502	-0.212	0.753	0.37	0.252	-0.003	0.524	0.038	0.177	0.446	0.417	0.243	-0.147	0.148	0.606	0.115
162.m02789	CNAG_04295	None	None	SPAC17A5.05c	None	None	None	None	None	None	None	conserved hypothetical protein	None	conserved fungal protein	None	None	None	None	None	None	None	None	None	-0.24	0.509	0.095	-0.427	0.653	0.15	0.077	0.108	0.265	-0.085	0.031	0.131	0.319	0.439	-0.364	0.096	-0.104	0.089
162.m02790	CNAG_04291	None	None	None	None	None	None	None	None	None	None	glycosyl-hydrolase	None	None	None	None	None	None	None	None	None	None	None	-0.227	0.603	-0.357	-0.167	0.324	-0.329	-0.022	-0.202	-0.106	0.054	0.24	-0.458	0.067	-0.016	-0.663	-0.14	0.218	-0.067
162.m02792	CNAG_04292	YLR439W	MRPL4	SPCC4G3.06c	mrpl4	orf19.6136	ca3419	IPF12778	KOG3331	J	Mitochondrial/chloroplast ribosomal protein L4/L29	conserved hypothetical protein	Mitochondrial ribosomal protein of the large subunit	mitochondrial ribosomal protein subunit L4	ribosomal protein, mitochondrial (by homology)	None	None	None	None	None	Cne_OxR-dw_2.0	None	Cne_OxSR-dw_2.0	-0.316	0.671	0.199	-0.511	0.615	0.302	0.34	0.033	0.435	-0.06	-0.008	-0.056	0.594	0.505	-0.158	0.161	0.164	0.037
162.m02793	CNAG_04293	YDR080W	VPS41	SPAP27G11.05c	vps41	orf19.4858	ca4729	VPS41.5f	KOG2066	U	Vacuolar assembly/sorting protein VPS41	vacuolar protein sorting 41	Vacuolar membrane protein that is a subunit of the homotypic vacuole fusion and vacuole protein sorting (HOPS) complex; essential for membrane docking and fusion at the Golgi-to-endosome and endosome-to-vacuole stages of protein transport	vacuolar protein sorting-associated protein Vps41	required for the vacuolar assembly, 5-prime end (by homology)	None	None	None	None	None	None	None	None	-0.154	1.089	0.292	-0.304	0.497	0.09	-0.163	-0.248	0.199	0.117	0.168	0.223	0.026	-0.042	-0.25	-0.117	0.192	-0.245
162.m02795	CNAG_04297	YNL072W	RNH201	SPAC4G9.02	None	orf19.6562	ca4876	RNH35	KOG2299	L	Ribonuclease HI	ribonuclease HI large subunit	Ribonuclease H2 catalytic subunit, removes RNA primers during Okazaki fragment synthesis; cooperates with Rad27p nuclease	ribonuclease H2 complex subunit (predicted)	RNase H (by homology)	None	None	None	None	None	Cne_OxR-dw_2.0	None	Cne_OxSR-dw_2.0	0.441	0.961	0.484	-0.2	0.274	-0.003	0.188	0.319	-0.16	0.184	0.484	0.417	0.701	-0.4	0.345	0.171	0.065	0.273
162.m02796	CNAG_04303	YDL074C	BRE1	SPCC970.10c	brl2	orf19.976	ca5424	IPF1598	KOG0978	O	E3 ubiquitin ligase involved in syntaxin degradation	E3 ubiquitin-protein ligase BRE1	E3 ubiquitin ligase for Rad6p, required for the ubiquitination of histone H2B, recruitment of Rad6p to promoter chromatin and subsequent methylation of histone H3 (on K4 and K79), contains RING finger domain	ubiquitin-protein ligase E3 Brl2	unknown function	None	None	None	None	None	None	None	None	-0.025	0.88	0.255	-0.484	0.5	-0.06	0.253	-0.031	-0.108	0.007	0.201	0.245	0.237	-0.098	-0.332	-0.022	-0.332	-0.221
162.m02797	CNAG_04308	None	None	None	None	None	None	None	KOG2304	I	3-hydroxyacyl-CoA dehydrogenase	short chain 3-hydroxyacyl-CoA dehydrogenase	None	None	None	None	None	None	None	None	Cne_OxR-dw_2.0	None	Cne_OxSR-dw_2.0	-0.155	1.019	0.326	-0.319	0.498	0.148	-0.198	-0.316	0.31	0.129	0.161	0.247	0.058	-0.081	-0.201	-0.101	0.252	-0.19
162.m02798	CNAG_04312	YER003C	PMI40	SPBC2G2.16	None	orf19.1390	ca0988	PMI40	KOG2757	G	Mannose-6-phosphate isomerase	mannose-6-phosphate isomerase	Mannose-6-phosphate isomerase, catalyzes the interconversion of fructose-6-P and mannose-6-P; required for early steps in protein mannosylation	mannose-6-phosphate isomerase (predicted)	mannose-6-phosphate isomerase (PHOSPHOMANNOSE ISOMERASE) (PMI)(PHOSPHOHEXOMUTASE)	None	None	None	None	None	Cne_OxR-dw_2.0	None	Cne_OxSR-dw_2.0	0.15	0.503	0.066	-0.52	0.352	0.056	0.188	-0.112	0.162	0.005	0.276	-0.07	0.17	-0.132	-0.2	-0.092	-0.426	-0.123
162.m02799	CNAG_04313	YHR179W	OYE2	SPAC5H10.10	None	orf19.3442	ca4021	EBP2	KOG0134	CR	NADH:flavin oxidoreductase/12-oxophytodienoate reductase	NADPH dehydrogenase 2	Widely conserved NADPH oxidoreductase containing flavin mononucleotide (FMN), homologous to Oye3p with slight differences in ligand binding and catalytic properties; may be involved in sterol metabolism	NADPH dehydrogenase (predicted)	NADPH dehydrogenase (by homology)	None	None	None	Cne_FxR-dw_2.0	None	None	None	Cne_FxSR-dw_2.0	-0.07	0.859	0.112	-0.324	0.27	0.009	-0.266	-0.203	0.127	0.103	0.17	0.077	-0.11	-0.097	-0.425	-0.217	-0.026	-0.177
162.m02804	CNAG_04321	YLR330W	CHS5	SPAC6G9.12	cfr1	orf19.807	ca1176	CHS5	None	None	None	yeast chs5 homologfibronectin type III domain-containing protein	Component of the exomer complex, which also contains Csh6p, Bch1p, Bch2p, and Bud7p and is involved in export of selected proteins, such as chitin synthase Chs3p, from the Golgi to the plasma membrane	Chs five related protein Cfr1	Chitin biosynthesis protein	None	None	None	None	None	None	None	None	-0.074	0.623	0.169	-0.468	0.459	0.031	0.194	-0.114	0.146	0.006	0.279	0.187	0.179	-0.107	-0.29	-0.04	-0.294	-0.068
162.m02805	CNAG_04322	None	None	None	None	None	None	None	None	None	None	conserved hypothetical protein	None	None	None	None	None	Cne_FxR-up_2.0	None	None	None	Cne_FxSR-up_2.0	None	0.036	-0.482	-0.216	-0.641	0.263	0.533	0.213	-0.235	0.208	0.151	0.351	-0.135	0.237	-0.248	-0.02	0.441	-0.184	0.533
162.m02806	CNAG_04325	None	None	SPBC1709.16c	None	orf19.6898	ca4579	IPF2234	None	None	None	extradiol ring-cleavage dioxygenase	None	aromatic ring-opening dioxygenase (predicted)	unknown function	None	Cne_OsR-dw_2.0	None	None	None	None	None	Cne_OsSR-dw_2.0	0.214	0.196	-0.172	-0.296	0.23	-0.439	-0.258	-0.402	-0.523	-0.02	0.383	-0.054	-0.284	-0.536	-0.61	-0.36	-0.421	-0.219
162.m02807	CNAG_04286	YOR224C	RPB8	SPBC14C8.12	rpb8	orf19.6314	ca3281	RPB8	KOG3400	K	RNA polymerase subunit 8	DNA-directed RNA polymerase I	RNA polymerase subunit ABC14.5, common to RNA polymerases I, II, and III	DNA-directed RNA polymerase I, II and III subunit Rpb8	DNA-directed RNA polymerase I, II, III 16 KD subunit (by homology)	None	None	None	None	None	None	None	None	0.465	0.511	0.711	-0.087	0.132	-0.003	0.429	0.268	-0.196	0.13	0.243	0.325	-0.032	0.372	-0.184	0.274	-0.029	0.326
162.m02812	CNAG_04132	YDL209C	CWC2	SPAC3A12.11c	cwf2	orf19.674	ca4110	IPF3965	KOG0118	R	FOG: RRM domain	pre-mRNA-splicing factor CWC2	Protein involved in pre-mRNA splicing, component of a complex containing Cef1p; interacts with Prp19p; contains an RNA recognition motif; has similarity to S. pombe Cwf2p	RNA-binding protein Cwf2	unknown function	None	None	None	None	None	None	None	None	-0.095	1.084	0.426	-0.301	0.583	0.127	-0.102	-0.283	0.185	0.136	0.147	0.3	0.067	-0.123	-0.166	-0.088	0.182	-0.183
162.m02813	CNAG_04136	YPR118W	MRI1	SPBC23E6.10c	None	orf19.2008	ca3934	IPF17119	KOG1468	J	Predicted translation initiation factor related to eIF-2B alpha/beta/delta subunits (CIG2/IDI2)	CIG2	Methylthioribose-1-phosphate isomerase, catalyzes the isomerization of 5-methylthioribose-1-phosphate to 5-methylthioribulose-1-phosphate in the methionine salvage pathway	methylthioribose-1-phosphate isomerase (predicted)	unknown function	None	None	None	None	None	None	None	None	-0.09	1.076	0.345	-0.501	0.543	0.086	0.159	-0.17	0.206	-0.006	0.34	0.175	0.296	-0.19	-0.135	-0.102	-0.349	-0.258
162.m02814	CNAG_04141	None	None	None	None	None	None	None	KOG2275	E	Aminoacylase ACY1 and related metalloexopeptidases	vacuolar protein	None	None	None	None	None	None	Cne_FxR-dw_2.0	None	None	None	Cne_FxSR-dw_2.0	0.312	0.518	0.3	-0.271	0.491	0.091	-0.018	0.349	0.154	0.292	0.007	0.234	-0.028	-0.157	-0.174	-0.064	-0.109	-0.179
162.m02816	CNAG_04149	None	None	SPBC428.01c	nup107	None	None	None	KOG1964	YU	Nuclear pore complex, rNup107 component (sc Nup84)	nuclear pore complex protein	None	nucleoporin Nup107	None	None	None	None	None	None	None	None	None	0.273	0.691	0.592	-0.195	0.461	0.029	0.235	0.353	-0.203	0.164	0.561	0.549	0.278	-0.234	0.23	0.226	-0.109	0.289
162.m02817	CNAG_04147	YHR065C	RRP3	SPAC823.08c	None	orf19.7546	ca5957	RRP3.3eoc	KOG0330	A	ATP-dependent RNA helicase	ATP-dependent rRNA helicase RRP3	Protein involved in rRNA processing; required for maturation of the 35S primary transcript of pre-rRNA and for cleavage leading to mature 18S rRNA; homologous to eIF-4a, which is a DEAD box RNA-dependent ATPase with helicase activity	ATP-dependent RNA helicase Rrp3 (predicted)	RNA-dependent ATPase, helicase,required for maturation of 35S primary transcript, 3-prime end (by homology)	None	None	None	None	None	None	None	None	0.016	1.38	0.824	-0.256	0.843	0.341	0.155	0.385	0.374	0.25	-0.03	0.574	0.331	-0.149	0.283	0.06	0.29	-0.234
162.m02818	CNAG_04152	YHR075C	PPE1	SPBP4H10.17c	None	orf19.1459	ca4543	PPE1	KOG2564	R	Predicted acetyltransferases and hydrolases with the alpha/beta hydrolase fold	hydrolase	Protein with carboxyl methyl esterase activity that may have a role in demethylation of the phosphoprotein phosphatase catalytic subunit; also identified as a small subunit mitochondrial ribosomal protein	carboxyl methyl esterase	Ribosomal protein of the small subunit, mitochondrial (by homology)	None	None	None	None	None	Cne_OxR-dw_2.0	None	Cne_OxSR-dw_2.0	0.106	1.201	0.611	-0.227	0.749	0.437	0.21	0.154	0.02	0.217	0.602	0.452	0.333	0.459	0.062	0.132	0.609	0.405
162.m02820	CNAG_04154	None	None	None	None	None	None	None	KOG2100	O	Dipeptidyl aminopeptidase	conserved hypothetical protein	None	None	None	None	None	None	None	None	None	None	None	-0.102	1.166	0.537	-0.199	0.751	0.286	0.209	0.489	0.346	0.117	-0.028	0.601	0.35	0.549	-0.028	0.027	0.698	0.046
162.m02821	CNAG_04156	YHR025W	THR1	SPBC4C3.03	None	orf19.923	ca1386	THR1	KOG1537	E	Homoserine kinase	homoserine kinase	Homoserine kinase, conserved protein required for threonine biosynthesis; expression is regulated by the GCN4-mediated general amino acid control pathway	homoserine kinase (predicted)	homoserine kinase	None	None	None	None	Cne_OxR-up_2.0	None	Cne_OxSR-up_2.0	None	-0.111	1.13	0.315	-0.229	0.507	0.081	-0.146	-0.269	0.266	0.15	0.146	0.122	0.035	-0.14	-0.156	-0.113	0.199	-0.172
162.m02822	CNAG_04155	YOR159C	SME1	SPBC11G11.06c	sme1	orf19.4205.1	ca2928	SME1	KOG1774	A	Small nuclear ribonucleoprotein E	small nuclear ribonucleoprotein E	Core Sm protein Sm E; part of heteroheptameric complex (with Smb1p, Smd1p, Smd2p, Smd3p, Smx3p, and Smx2p) that is part of the spliceosomal U1, U2, U4, and U5 snRNPs; homolog of human Sm E	Sm snRNP core protein Sme1	Nuclear ribonucleoprotein E	None	None	None	None	None	None	None	None	0.341	0.927	0.245	-0.254	0.108	0.183	0.156	-0.006	-0.661	0.122	0.4	0.373	0.058	0.225	-0.037	0.123	0.048	0.047
162.m02823	CNAG_04153	None	None	None	None	None	None	None	None	None	None	conserved hypothetical protein	None	None	None	None	Cne_OsR-dw_2.0	None	None	Cne_OxR-up_2.0	None	Cne_OxSR-up_2.0	Cne_OsSR-dw_2.0	0.045	0.869	0.503	-0.322	0.621	0.02	0.075	0.325	0.426	0.147	-0.037	0.198	0.16	0.414	-0.173	-0.099	0.391	0.095
162.m02824	CNAG_04151	YAR042W	SWH1	SPBC2F12.05c	None	orf19.5095	ca3885	IPF19790	KOG1737	I	Oxysterol-binding protein	oxysterol-binding protein	Protein similar to mammalian oxysterol-binding protein; contains ankyrin repeats; localizes to the Golgi and the nucleus-vacuole junction	sterol binding ankyrin repeat protein	oxysterol binding protein (by homology)	None	None	None	None	None	Cne_OxR-dw_2.0	None	Cne_OxSR-dw_2.0	-0.037	0.665	0.319	-0.544	0.641	0.091	0.187	-0.253	0.197	0.002	0.367	0.207	0.24	-0.07	-0.005	-0.009	-0.251	-0.066
162.m02825	CNAG_04148	YAR018C	KIN3	SPAC19E9.02	fin1	orf19.5325	ca5490	KIN3	KOG1826	V	Ras GTPase activating protein RasGAP/neurofibromin	other/NEK protein kinase	Nonessential protein kinase with unknown cellular role	serine/threonine protein kinase Fin1	G2-specific serine/threonine protein kinase (by homology)	None	None	None	None	None	None	None	None	-0.205	1.215	0.455	-0.192	0.782	0.278	0.096	-0.097	0.529	0.026	0.17	0.476	0.475	0.028	-0.078	0.081	0.863	-0.017
162.m02826	CNAG_04142	None	None	None	None	None	None	None	KOG2533	G	Permease of the major facilitator superfamily	tartrate transporter	None	None	None	None	None	None	None	Cne_OxR-up_2.0	None	Cne_OxSR-up_2.0	None	-0.299	0.886	-0.174	-0.426	0.896	0.29	0.369	-0.096	0.532	-0.079	-0.016	0.257	0.528	0.475	-0.186	0.188	-0.003	-0.06
162.m02827	CNAG_04131	YLR398C	SKI2	SPCC550.03c	None	orf19.6425	ca5108	SKI2	KOG0947	A	Cytoplasmic exosomal RNA helicase SKI2, DEAD-box superfamily	translation repressor	Putative RNA helicase, involved in exosome mediated 3' to 5' mRNA degradation and translation inhibition of non-poly(A) mRNAs; forms complex with Ski3p and Ski8p; required for repressing propagation of dsRNA viruses	Ski complex RNA helicase Ski2 (predicted)	Antiviral protein and putative helicase	None	None	None	None	None	None	None	None	-0.155	1.061	0.185	-0.279	0.658	0.214	-0.041	-0.199	0.093	0.043	0.173	0.287	0.199	0.021	-0.263	-0.085	0.517	-0.071
162.m02828	CNAG_04130	None	None	None	None	orf19.5338	ca5497	IPF776	None	None	None	conserved hypothetical protein	None	None	transcriptional activator (by homology)	None	None	Cne_FxR-up_2.0	None	None	None	Cne_FxSR-up_2.0	None	-0.319	0.896	0.183	-0.447	0.42	0.346	0.174	0.048	0.683	-0.087	0.004	-0.02	0.497	0.54	-0.13	0.049	0.019	0.035
162.m02829	CNAG_04281	None	None	None	None	None	None	None	None	None	None	conserved hypothetical protein	None	None	None	None	None	None	None	None	None	None	None	-0.054	0.907	0.247	-0.221	0.479	0.341	-0.033	-0.255	0.105	0.042	0.148	0.266	0.196	0.017	-0.236	-0.045	0.478	0.002
162.m02830	CNAG_04282	None	None	None	None	None	None	None	KOG0660	T	Mitogen-activated protein kinase	CMGC/MAPK protein kinase	None	None	None	None	None	None	None	None	None	None	None	-0.366	0.895	0.208	-0.475	0.592	0.367	0.286	-0.029	0.499	-0.103	-0.053	0.118	0.67	0.481	-0.176	0.179	0.105	-0.041
162.m02831	CNAG_04287	YJL143W	TIM17	SPAC3A12.16c	tim17	orf19.150	ca0010	IPF16036	KOG1652	U	Mitochondrial import inner membrane translocase, subunit TIM17	mitochondrial import inner membrane translocase subunit	Essential constituent of the mitochondrial inner membrane presequence translocase; interacts with Pam18p to recruit the presequence translocase-associated motor (PAM complex) and also required for protein sorting during import	TIM23 translocase complex subunit Tim17	similar to Saccharomyces cerevisiae Tim17p mitochondrial inner membrane import translocase subunit (by homology)	None	None	None	None	None	None	None	None	0.993	0.208	0.13	-0.219	0.311	-0.181	-0.331	0.018	-0.248	-0.183	0.079	0.027	-0.231	-0.006	-0.221	-0.155	-0.195	0.204
162.m02833	CNAG_04290	None	None	None	None	None	None	None	None	None	None	conserved hypothetical protein	None	None	None	None	None	None	None	None	None	None	None	0.139	0.625	0.011	-0.304	0.159	-0.008	-0.319	-0.434	-0.1	-0.052	0.153	-0.048	-0.141	-0.078	-0.388	-0.164	0.065	-0.094
162.m02834	CNAG_04158	YBL008W	HIR1	SPBC31F10.13c	hip1	orf19.2099	ca2745	HIR1.3f	KOG0973	DK	Histone transcription regulator HIRA, WD repeat superfamily	transcription corepressor	Subunit of the HIR complex, a nucleosome assembly complex involved in regulation of histone gene transcription; contributes to nucleosome formation, heterochromatic gene silencing, and formation of functional kinetochores	hira protein Hip1	Histone transcription regulator (by homology)	None	None	None	None	None	None	None	None	-0.277	0.795	0.105	-0.566	0.584	0.31	0.173	-0.103	0.013	-0.079	-0.08	0.092	0.452	0.476	-0.121	0.142	0.012	-0.001
162.m02835	CNAG_04159	YKR017C	None	SPAC328.02	None	orf19.7224	ca5349	IPF861	KOG1815	O	Predicted E3 ubiquitin ligase	IBR domain-containing protein	None	human Ariadne homolog	unknown function	None	None	None	None	Cne_OxR-up_2.0	None	Cne_OxSR-up_2.0	None	-0.014	0.744	0.111	-0.396	0.629	0.233	0.188	0.28	0.223	0.144	0.018	0.084	0.056	0.45	-0.071	-0.073	0.577	0.043
162.m02838	CNAG_04164	None	None	None	None	None	None	None	None	None	None	conserved hypothetical protein	None	None	None	None	None	None	None	None	None	None	None	0.052	1.379	0.867	-0.244	0.611	0.345	0.319	0.235	-0.003	0.163	0.656	0.438	0.435	0.372	0.069	0.218	0.746	0.079
162.m02841	CNAG_04168	None	None	None	None	None	None	None	KOG4012	B	Histone H1	conserved hypothetical protein	None	None	None	None	Cne_OsR-dw_2.0	None	Cne_FxR-dw_2.0	None	Cne_OxR-dw_2.0	None	Cne_CSR-dw_2.0	-0.142	1.057	0.183	-0.262	0.456	0.154	-0.083	-0.279	0.339	0.072	0.134	0.15	0.218	0.005	-0.229	-0.056	0.552	-0.111
162.m02843	CNAG_04170	YDL156W	None	None	None	orf19.6907	ca4590	IPF2218	KOG4328	S	WD40 protein	WD domain-containing protein	None	None	unknown function	None	None	None	Cne_FxR-dw_2.0	None	None	None	Cne_FxSR-dw_2.0	-0.321	1.094	0.48	-0.502	0.825	0.359	0.317	0.1	0.397	-0.11	-0.039	0.374	0.684	0.456	0.098	0.154	0.097	-0.075
162.m02845	CNAG_04171	YMR200W	ROT1	SPAC31G5.02	None	orf19.6029	ca1583	ROT1	None	None	None	conserved hypothetical protein	Essential ER membrane protein; may be involved in protein folding; mutation causes defects in cell wall synthesis and in lysis of autophagic bodies, suppresses tor2 mutations, and is synthetically lethal with kar2-1 and with rot2 mutations	conserved fungal protein	Suppressor of TOR2 mutations (by homology)	None	None	None	None	Cne_OxR-up_2.0	None	Cne_OxSR-up_2.0	None	0.67	0.162	-0.089	-0.224	0.364	-0.092	-0.159	0.248	-0.077	0.157	0.088	-0.047	-0.277	0.193	-0.403	-0.164	-0.101	0.102
162.m02846	CNAG_04175	None	None	None	None	None	None	None	KOG0939	OK	E3 ubiquitin-protein ligase/Putative upstream regulatory element binding protein	conserved hypothetical protein	None	None	None	None	None	None	None	None	None	None	None	-0.037	1.408	0.932	-0.32	0.698	0.506	0.374	0.074	0.094	0.278	0.7	0.633	0.626	0.298	0.318	0.305	0.831	0.073
162.m02848	CNAG_04180	YNL284C	MRPL10	SPBC9B6.06	mrpl10	orf19.3532	ca0519	MRPL10.3	KOG0846	J	Mitochondrial/chloroplast ribosomal protein L15/L10	ribosomal protein L10	Mitochondrial ribosomal protein of the large subunit; appears as two protein spots (YmL10 and YmL18) on two-dimensional SDS gels	mitochondrial ribosomal protein subunit L15	ribosomal protein, 3-prime end (by homology)	None	None	None	None	None	Cne_OxR-dw_2.0	None	Cne_OxSR-dw_2.0	-0.136	1.073	0.388	-0.286	0.664	0.016	-0.014	-0.477	0.301	0.089	0.165	0.256	0.309	0.12	-0.223	0.02	0.618	-0.133
162.m02849	CNAG_04183	None	None	None	None	None	None	None	None	None	None	conserved hypothetical protein	None	None	None	None	None	None	None	None	None	None	None	-0.064	0.702	0.377	-0.399	0.218	0.199	0.185	-0.056	0.007	-0.13	-0.095	0.15	0.103	0.427	0.107	0.013	-0.046	-0.1
162.m02851	CNAG_04187	YJL091C	GWT1	SPAC144.10c	gwt1	orf19.6884	ca4573	IPF9431	KOG0411	S	Uncharacterized membrane protein	GPI-anchored wall transfer protein 1	Protein involved in the inositol acylation of glucosaminyl phosphatidylinositol (GlcN-PI) to form glucosaminyl(acyl)phosphatidylinositol (GlcN(acyl)PI), an intermediate in the biosynthesis of glycosylphosphatidylinositol (GPI) anchors	pig-W	unknown function	None	None	Cne_FxR-up_2.0	None	None	Cne_OxR-dw_2.0	Cne_FxSR-up_2.0	Cne_OxSR-dw_2.0	-0.128	0.905	0.154	-0.304	0.316	0.075	-0.196	-0.283	0.147	0.136	0.167	0.07	-0.124	-0.181	-0.352	-0.139	-0.027	-0.115
162.m02853	CNAG_04188	None	None	None	None	None	None	None	KOG1663	Q	O-methyltransferase	O-methyltransferase	None	None	None	None	None	None	None	None	Cne_OxR-dw_2.0	None	Cne_OxSR-dw_2.0	0.293	0.369	0.165	-0.202	0.591	0.069	0.076	0.155	0.344	0.245	-0.029	0.012	0.156	0.41	0.005	0.091	0.297	0.122
162.m02854	CNAG_04190	YOL006C	TOP1	SPBC1703.14c	top1	orf19.96	ca1990	TOP1	KOG0981	L	DNA topoisomerase I	topoisomerase I	Topoisomerase I, nuclear enzyme that relieves torsional strain in DNA by cleaving and re-sealing the phosphodiester backbone; relaxes both positively and negatively supercoiled DNA; functions in replication, transcription, and recombination	DNA topoisomerase I	CANAL DNA TOPOISOMERASE I	None	None	None	None	None	None	None	None	-0.097	0.925	0.422	-0.516	0.487	0.057	0.188	-0.267	-0.356	0.007	0.411	0.062	0.161	-0.248	-0.085	-0.031	-0.532	-0.236
162.m02855	CNAG_04189	YKL148C	SDH1	SPAC1556.02c	sdh1	orf19.440	ca4063	SDH11	KOG2403	C	Succinate dehydrogenase, flavoprotein subunit	succinate dehydrogenase flavoprotein subunit	Flavoprotein subunit of succinate dehydrogenase (Sdh1p, Sdh2p, Sdh3p, Sdh4p), which couples the oxidation of succinate to the transfer of electrons to ubiquinone	succinate dehydrogenase Sdh1	Succinate dehydrogenase (by homology)	None	Cne_OsR-dw_2.0	None	None	None	Cne_OxR-dw_2.0	None	None	0.167	0.52	0.234	-0.21	0.162	-0.093	-0.179	-0.25	-0.073	0.128	0.151	-0.094	-0.149	-0.182	-0.679	-0.182	-0.007	-0.186
162.m02858	CNAG_04184	None	None	SPBC530.05	None	orf19.1499	None	None	None	None	None	conserved hypothetical protein	None	transcription factor (predicted)	None	None	None	None	None	None	None	None	None	-0.211	1.063	0.511	-0.47	0.68	-0.029	0.171	-0.303	0.235	0.007	0.473	0.435	0.257	-0.105	-0.018	0.001	-0.37	-0.253
162.m02859	CNAG_04181	YIR005W	IST3	SPBC887.05c	cwf29	orf19.1045	ca0922	IPF12991	KOG0126	R	Predicted RNA-binding protein (RRM superfamily)	RNA-binding protein	Component of the U2 snRNP, required for the first catalytic step of splicing and for spliceosomal assembly; interacts with Rds3p and is required for Mer1p-activated splicing	RNA-binding protein Cwf29	unknown function	None	None	None	None	None	Cne_OxR-dw_2.0	None	Cne_OxSR-dw_2.0	-0.175	1.136	0.371	-0.315	0.488	-0.011	-0.087	-0.075	0.329	0.096	0.122	0.25	0.088	-0.129	-0.194	-0.073	0.242	-0.107
162.m02861	CNAG_04179	YDR037W	KRS1	SPBC17G9.03c	None	orf19.6749	ca5947	KRS1	KOG1885	J	Lysyl-tRNA synthetase (class II)	lysine-tRNA ligase	Lysyl-tRNA synthetase; also identified as a negative regulator of general control of amino acid biosynthesis	lysine-tRNA ligase	Lysyl-tRNA synthetase (by homology)	None	None	None	None	None	Cne_OxR-dw_2.0	None	Cne_OxSR-dw_2.0	0.098	0.713	0.225	-0.457	0.337	-0.042	0.116	-0.276	-0.239	0.004	0.409	-0.056	-0.04	-0.168	-0.278	-0.133	-0.567	-0.21
162.m02864	CNAG_04176	None	None	None	None	None	None	None	KOG0627	K	Heat shock transcription factor	conserved hypothetical protein	None	None	None	None	None	None	None	None	None	None	None	-0.058	0.939	0.279	-0.289	0.393	0.132	-0.135	-0.162	0.177	0.116	0.181	0.171	-0.067	-0.227	-0.149	-0.08	0.064	-0.12
162.m02867	CNAG_04169	None	None	None	None	None	None	None	KOG4240	T	Multidomain protein, contains SPEC repeats, PH, SH3, and separate rac-specific and rho-specific guanine nucleotide exchange factor domains	conserved hypothetical protein	None	None	None	None	None	None	None	Cne_OxR-up_2.0	None	Cne_OxSR-up_2.0	None	0.169	1.187	0.498	-0.165	1.186	0.631	0.332	0.16	-0.145	0.142	0.797	0.719	0.526	0.186	0.202	0.289	0.795	0.367
162.m02868	CNAG_04162	None	None	None	None	None	None	None	KOG0616	T	cAMP-dependent protein kinase catalytic subunit (PKA)	AGC/PKA protein kinase	None	None	None	None	None	None	None	Cne_OxR-up_2.0	None	Cne_OxSR-up_2.0	None	-0.116	0.751	0.216	-0.456	0.52	0.081	0.124	-0.273	-0.017	0.024	0.539	-0.017	0.153	-0.312	-0.067	-0.037	-0.502	-0.226
162.m02869	CNAG_04192	YGR061C	ADE6	SPAC6F12.10c	ade3	orf19.6317	ca3284	ADE6	KOG1907	F	Phosphoribosylformylglycinamidine synthase	phosphoribosylformylglycinamidine synthase	Formylglycinamidine-ribonucleotide (FGAM)-synthetase, catalyzes a step in the 'de novo' purine nucleotide biosynthetic pathway	phosphoribosylformylglycinamidine synthase Ade3 (predicted)	5 -phosphoribosylformyl glycinamidine synthetase (by homology)	Cne_OsR-up_2.0	None	None	None	Cne_OxR-up_2.0	Cne_OxR-dw_2.0	None	Cne_OxSR-dw_2.0	-0.035	0.826	0.48	-0.335	0.731	0.065	0.137	0.186	-0.6	0.163	0.03	0.327	0.253	0.541	0.053	-0.053	0.746	0.068
162.m02871	CNAG_04194	YLR208W	SEC13	SPBC215.15	sec13	orf19.316	ca3392	SEC13	KOG1332	U	Vesicle coat complex COPII, subunit SEC13	protein transport protein SEC13	Component of both the Nup84 nuclear pore sub-complex and of the COPII complex (Sar1p, Sec13p, Sec16p, Sec23p, Sec24p, Sec31p, Sfb2p, and Sfb3p) which is important for the formation of ER to Golgi transport vesicles	COPII-coated vesicle component Sec13	Protein transport protein	None	None	None	None	None	None	None	None	0.08	0.831	0.249	-0.264	0.356	0.018	-0.168	-0.173	0.143	0.142	0.173	0.081	-0.031	-0.232	-0.273	-0.108	0.129	-0.022
162.m02872	CNAG_04195	None	None	None	None	None	None	None	KOG1663	Q	O-methyltransferase	O-methyltransferase	None	None	None	None	None	None	None	None	None	None	None	0.508	-0.194	-0.106	-0.453	0.381	-0.289	-0.548	-0.098	-0.682	0.184	0.155	-0.517	-0.467	-0.25	-0.289	-0.244	-0.62	0.127
162.m02873	CNAG_04196	YDL029W	ARP2	SPAC11H11.06	arp2	orf19.7292	ca5532	ARP2	KOG0677	Z	Actin-related protein Arp2/3 complex, subunit Arp2	actin binding protein	Essential component of the Arp2/3 complex, which is a highly conserved actin nucleation center required for the motility and integrity of actin patches; involved in endocytosis and membrane growth and polarity	ARP2/3 actin-organizing complex subunit Arp2	actin-like protein (by homology)	None	None	None	None	None	None	None	None	0.747	0.729	0.546	-0.19	0.496	-0.185	0.118	0.428	-0.048	0.137	0.357	0.484	0.067	-0.143	0.165	0.253	-0.187	0.148
162.m02874	CNAG_04196	YDL029W	ARP2	SPAC11H11.06	arp2	orf19.7292	ca5532	ARP2	KOG0677	Z	Actin-related protein Arp2/3 complex, subunit Arp2	actin binding protein	Essential component of the Arp2/3 complex, which is a highly conserved actin nucleation center required for the motility and integrity of actin patches; involved in endocytosis and membrane growth and polarity	ARP2/3 actin-organizing complex subunit Arp2	actin-like protein (by homology)	None	None	None	None	None	None	None	None	0.58	0.652	0.317	-0.267	0.373	-0.062	0.052	0.206	0.097	0.264	0.007	0.341	0.071	-0.077	-0.053	0.055	-0.214	-0.091
162.m02875	CNAG_04197	None	None	None	None	None	None	None	KOG0667	R	Dual-specificity tyrosine-phosphorylation regulated kinase	CMGC/DYRK protein kinase	None	None	None	None	None	None	None	None	None	None	None	0.353	0.793	0.495	-0.128	0.515	0.135	0.138	0.336	0.209	0.148	0.433	0.389	0.388	-0.246	0.152	0.229	-0.06	0.553
162.m02876	CNAG_04199	None	None	None	None	None	None	None	KOG0384	K	Chromodomain-helicase DNA-binding protein	conserved hypothetical protein	None	None	None	None	None	None	None	None	None	None	None	0.102	1.229	0.516	-0.311	0.606	0.156	0.172	0.277	0.081	0.275	0.02	0.619	0.38	-0.226	0.227	0.047	0.048	-0.234
162.m02879	CNAG_04203	None	None	None	None	None	None	None	KOG4733	R	FOG: RRM domain	conserved hypothetical protein	None	None	None	None	None	None	None	None	None	None	None	0.533	0.867	0.628	-0.192	0.272	-0.214	0.089	0.256	-0.027	0.117	0.45	0.307	0.392	-0.31	0.106	0.196	-0.235	0.286
162.m02880	CNAG_04205	None	None	SPBC21D10.10	None	orf19.6694	ca4297	IPF2603	None	None	None	conserved hypothetical protein	None	bromodomain protein	unknown function	None	None	None	None	None	None	None	None	0.284	0.856	0.274	-0.259	0.644	0.084	-0.121	0.273	-0.141	0.271	0.012	0.326	0.047	-0.275	-0.128	-0.196	-0.212	-0.189
162.m02881	CNAG_04207	YKL179C	COY1	SPCC364.04c	None	orf19.841	ca2093	IPF3406	KOG0963	K	Transcription factor/CCAAT displacement protein CDP1	conserved hypothetical protein	Golgi membrane protein with similarity to mammalian CASP; genetic interactions with GOS1 (encoding a Golgi snare protein) suggest a role in Golgi function	CASP family protein	unknown function	None	None	None	None	None	None	None	None	0.032	0.814	0.346	-0.494	0.52	-0.044	0.171	-0.249	-0.308	0.009	0.486	0.214	0.054	-0.242	-0.009	0.017	-0.448	-0.183
162.m02882	CNAG_04209	None	None	SPCC965.06	None	None	None	None	KOG1575	C	Voltage-gated shaker-like K+ channel, subunit beta/KCNAB	voltage-gated potassium channel beta-2 subunit	None	potassium channel subunit (predicted)	None	None	None	None	None	None	None	None	None	0.91	0.366	0.524	-0.302	0.359	-0.424	0.011	0.12	-0.225	0.073	0.302	0.195	0.145	-0.431	-0.77	0.223	-0.735	0.23
162.m02883	CNAG_04210	None	None	None	None	None	None	None	KOG0254	R	Predicted transporter (major facilitator superfamily)	sugar transporter	None	None	None	None	None	None	None	None	None	None	None	-0.105	0.962	0.196	-0.359	0.519	0.128	-0.106	-0.182	0.262	0.138	0.183	0.019	-0.015	-0.261	-0.106	-0.12	0.162	-0.224
162.m02885	CNAG_04212	None	None	None	None	None	None	None	None	None	None	conserved hypothetical protein	None	None	None	None	None	None	None	None	None	None	None	0.975	0.489	0.428	-0.324	0.584	-0.042	-0.156	0.256	0.123	0.261	-0.032	0.359	0.067	0.124	-0.068	0.046	-0.053	0.121
162.m02887	CNAG_04215	YJR010W	MET3	SPBC27.08c	sua1	orf19.5025	ca5238	MET3	KOG0636	P	ATP sulfurylase (sulfate adenylyltransferase)	sulfate adenylyltransferase	ATP sulfurylase, catalyzes the primary step of intracellular sulfate activation, essential for assimilatory reduction of sulfate to sulfide, involved in methionine metabolism	sulfate adenylyltransferase (ATP)	ATP sulfurylase	Cne_OsR-up_2.0	None	Cne_FxR-up_2.0	None	None	Cne_OxR-dw_2.0	None	Cne_OxSR-dw_2.0	0.788	0.847	0.659	-0.089	0.361	-0.303	0.101	0.266	-0.152	0.145	0.09	0.607	-0.02	-0.332	-0.221	0.054	-0.39	0.513
162.m02888	CNAG_04217	YKR097W	PCK1	None	None	orf19.7514	ca5857	PCK1	None	None	None	phosphoenolpyruvate carboxykinase	Phosphoenolpyruvate carboxykinase, key enzyme in gluconeogenesis, catalyzes early reaction in carbohydrate biosynthesis, glucose represses transcription and accelerates mRNA degradation, regulated by Mcm1p and Cat8p, located in the cytosol	None	phosphoenolpyruvate carboxykinase	None	None	None	None	Cne_OxR-up_2.0	None	Cne_OxSR-up_2.0	None	-0.038	0.417	-0.252	-0.459	0.548	0.068	0.084	-0.253	-0.02	0.035	0.548	-0.375	0.074	-0.28	-0.108	-0.097	-0.382	-0.201
162.m02889	CNAG_04219	YML004C	GLO1	SPBC12C2.12c	glo1	orf19.6058	ca4918	GLO1	KOG2944	G	Glyoxalase	lactoylglutathione lyase	Monomeric glyoxalase I, catalyzes the detoxification of methylglyoxal (a by-product of glycolysis) via condensation with glutathione to produce S-D-lactoylglutathione; expression regulated by methylglyoxal levels and osmotic stress	glyoxalase I	Glyoxalase I (by homology)	None	None	None	None	None	Cne_OxR-dw_2.0	None	Cne_OxSR-dw_2.0	1.038	0.482	0.401	-0.387	0.695	0.063	-0.012	0.165	-0.189	0.236	0.064	0.284	0.123	-0.179	-0.207	0.045	-0.362	0.066
162.m02890	CNAG_04221	YJL155C	FBP26	SPAC732.02c	None	orf19.6423	ca5110	FBP26	KOG0234	G	Fructose-6-phosphate 2-kinase/fructose-2,6-biphosphatase	fructose-2,6-bisphosphatase	Fructose-2,6-bisphosphatase, required for glucose metabolism	fructose-2,6-bisphosphate 2-phosphatase activity (predicted)	Fructose-2,6-bisphosphatase (by homology)	None	None	None	None	Cne_OxR-up_2.0	None	Cne_OxSR-up_2.0	None	-0.204	1.132	0.416	-0.315	0.75	0.17	-0.028	-0.459	0.171	0.026	0.16	0.239	0.304	0.061	-0.215	0.038	0.636	-0.129
162.m02891	CNAG_04222	YGR245C	SDA1	SPBC106.14c	sda1	orf19.6648	ca4089	IPF5009	KOG2229	DZ	Protein required for actin cytoskeleton organization and cell cycle progression	SDA1 family protein	Highly conserved nuclear protein required for actin cytoskeleton organization and passage through Start, plays a critical role in G1 events, binds Nap1p, also involved in 60S ribosome biogenesis	SDA1 family protein	unknown function	None	None	None	None	None	None	None	None	0.147	1.256	0.646	-0.201	0.446	0.014	0.109	0.402	1.051	0.197	0.635	0.485	0.826	-0.331	0.335	0.402	-0.282	0.024
162.m02892	CNAG_04224	YLR019W	PSR2	SPAC2F7.02c	None	orf19.5406	ca5764	IPF20031	KOG1605	K	TFIIF-interacting CTD phosphatase, including NLI-interacting factor (involved in RNA polymerase II regulation)	plasma membrane phosphatase required for sodium stress response	Functionally redundant Psr1p homolog, a plasma membrane phosphatase involved in the general stress response; required with Psr1p and Whi2p for full activation of STRE-mediated gene expression, possibly through dephosphorylation of Msn2p	phosphoprotein phosphatase (predicted)	similar to Saccharomyces cerevisiae Psr2p plasma membrane phosphatase required for sodium stress response (by homology)	None	None	None	None	None	None	None	None	-0.242	0.839	0.332	-0.538	0.677	0.133	0.217	-0.129	0.224	-0.108	-0.158	0.046	0.441	0.412	-0.182	0.129	-0.034	-0.049
162.m02894	CNAG_04213	YOR127W	RGA1	SPBC28E12.03	rga4	None	None	None	KOG1453	T	Chimaerin and related Rho GTPase activating proteins	signal transducer	GTPase-activating protein for the polarity-establishment protein Cdc42p; implicated in control of septin organization, pheromone response, and haploid invasive growth	GTPase activating protein Rga4	None	None	None	None	None	None	None	None	None	-0.213	1.077	0.415	-0.207	0.614	0.109	-0.042	-0.46	0.37	0.044	0.137	0.229	0.192	0.106	-0.269	0.03	0.651	-0.158
162.m02895	CNAG_04208	None	None	None	None	None	None	None	KOG2935	R	Ataxin 3/Josephin	machado-Joseph disease protein 1	None	None	None	None	None	None	None	None	None	None	None	-0.294	0.952	0.165	-0.44	0.769	0.275	0.225	0.015	0.547	-0.061	-0.091	0.103	0.487	0.429	-0.052	0.057	0.006	0.027
162.m02896	CNAG_04206	None	None	None	None	None	None	None	KOG3595	Z	Dyneins, heavy chain	DUF636 domain-containing protein	None	None	None	None	None	Cne_FxR-up_2.0	None	None	None	Cne_FxSR-up_2.0	None	-0.178	0.613	0.029	-0.368	0.506	0.077	-0.01	-0.588	0.239	0.063	0.155	-0.216	0.132	0.031	-0.537	0.172	0.223	0.059
162.m02897	CNAG_04204	YGR063C	SPT4	SPBC21C3.16c	spt4	orf19.3947	ca1091	SPT4	KOG3490	K	Transcription elongation factor SPT4	transcription initiation protein spt4	Protein that forms a complex with Spt5p and mediates both activation and inhibition of transcription elongation, and plays a role in pre-mRNA processing; in addition, Spt4p is involved in kinetochore function and gene silencing	transcription elongation factor complex subunit Spt4	transcription elongation protein (by homology)	None	None	None	None	None	None	None	None	0.408	0.524	0.398	-0.268	0.456	-0.148	0.079	0.306	-0.389	0.297	0.028	0.314	0.202	-0.216	-0.105	0.096	-0.531	-0.246
162.m02898	CNAG_04202	YNL240C	NAR1	SPCC1450.10c	None	orf19.4757	ca2632	NAR1	KOG2439	Y	Nuclear architecture related protein	iron hydrogenase	Nuclear architecture related protein; component of the cytosolic iron-sulfur (FeS) protein assembly machinery, required for maturation of cytosolic and nuclear FeS proteins; homologous to human Narf	iron hydrogenase (predicted)	Yeast nuclear architecture related protein (by homology)	None	Cne_OsR-dw_2.0	None	Cne_FxR-dw_2.0	None	None	None	None	-0.219	0.65	0.263	-0.44	0.705	0.302	0.232	-0.018	0.069	-0.102	-0.082	0.105	0.49	0.443	-0.169	0.138	-0.021	-0.067
162.m02900	CNAG_04200	None	None	None	None	None	None	None	KOG1012	R	Ca2+-dependent lipid-binding protein CLB1/vesicle protein vp115/Granuphilin A, contains C2 domain	C2 domain-containing protein	None	None	None	None	None	None	None	Cne_OxR-up_2.0	None	Cne_OxSR-up_2.0	None	-0.232	1.02	0.283	-0.328	0.632	0.175	-0.096	-0.481	0.389	0.028	0.168	0.073	0.228	0.119	-0.292	0.013	0.658	-0.141
162.m02901	CNAG_04191	YOR112W	CEX1	SPAC15A10.13	ppk3	orf19.3744	ca3256	IPF4730	KOG1243	R	Protein kinase	other/Scy1 protein kinase	Cytoplasmic component of the nuclear aminoacylation-dependent tRNA export pathway; interacts with nuclear pore component Nup116p; copurifies with tRNA export receptors Los1p and Msn5p, as well as eIF-1a and the RAN GTPase Gsp1p	serine/threonine protein kinase Ppk3	unknown Function	None	None	None	None	None	None	None	None	-0.196	0.612	0.294	-0.473	0.702	0.097	0.123	0.202	-0.161	-0.059	-0.053	0.128	0.223	0.403	-0.189	0.05	-0.095	0.033
162.m02902	CNAG_04226	None	None	SPAC167.03c	snu66	None	None	None	KOG2217	A	U4/U6.U5 snRNP associated protein	conserved hypothetical protein	None	U4/U6 x U5 tri-snRNP complex subunit Snu66 (predicted)	None	None	None	None	None	Cne_OxR-up_2.0	None	Cne_OxSR-up_2.0	None	0.229	1.096	0.696	-0.191	0.79	0.309	0.35	-0.059	-0.252	0.229	0.605	0.451	0.364	0.23	-0.148	0.324	0.449	0.375
162.m02903	CNAG_04228	None	None	None	None	None	None	None	KOG0725	R	Reductases with broad range of substrate specificities	2,4-dienoyl-CoA reductase	None	None	None	None	None	None	None	None	None	None	None	0.437	1.069	0.688	-0.058	0.585	0.255	0.577	0.277	0.487	0.211	0.209	0.456	0.275	0.396	0.299	0.491	0.285	0.356
162.m02904	CNAG_04229	None	None	None	None	orf19.7316	ca5552	IPF5971	KOG3290	I	Peroxisomal phytanoyl-CoA hydroxylase	phytanoyl-CoA dioxygenase family protein	None	None	unknown function	None	None	None	None	None	None	None	None	-0.269	1.204	0.463	-0.264	0.692	0.357	-0.003	-0.476	0.459	0.057	0.124	0.296	0.313	0.184	-0.15	0.095	0.777	-0.143
162.m02906	CNAG_04238	YNL202W	SPS19	None	None	orf19.4157	ca1225	SPS20	KOG0725	R	Reductases with broad range of substrate specificities	2,4-dienoyl-CoA reductase	Peroxisomal 2,4-dienoyl-CoA reductase, auxiliary enzyme of fatty acid beta-oxidation; homodimeric enzyme required for growth and sporulation on petroselineate medium; expression induced during late sporulation and in the presence of oleate	None	peroxisomal 2,4-dienoyl-CoA reductase (by homology)	None	None	None	None	None	None	None	None	-0.173	0.786	0.295	-0.474	0.928	0.012	0.008	0.022	0.031	-0.073	-0.085	0.052	0.356	0.371	-0.147	0.033	-0.085	-0.087
162.m02908	CNAG_04243	YAL041W	CDC24	SPAC16E8.09	scd1	orf19.3174	ca0509	CDC24	KOG3519	T	Invasion-inducing protein TIAM1/CDC24 and related RhoGEF GTPases	Cdc24	Guanine nucleotide exchange factor (GEF or GDP-release factor) for Cdc42p; required for polarity establishment and maintenance, and mutants have morphological defects in bud formation and shmooing	RhoGEF Scd1	GTP/GDP exchange factor for Cdc42p (by homology)	None	None	None	None	None	None	None	None	-0.194	1.018	0.342	-0.277	0.754	0.299	-0.113	-0.442	0.346	0.106	0.156	0.195	0.237	0.147	-0.196	-0.02	0.555	-0.186
162.m02909	CNAG_04245	None	None	None	None	None	None	None	KOG2806	G	Chitinase	chitinase	None	None	None	None	None	None	None	None	None	None	None	0.165	0.909	0.581	-0.116	0.272	-0.058	0.072	0.22	-0.013	0.198	-0.003	0.359	0.14	0.458	0.419	-0.134	0.588	-0.096
162.m02910	CNAG_04253	None	None	None	None	None	None	None	KOG3140	S	Predicted membrane protein	transmembrane protein	None	None	None	None	None	None	None	None	None	None	None	0.143	0.694	0.19	-0.206	0.779	0.226	0.189	-0.067	0.431	0.234	0.625	0.138	0.004	0.115	0.082	-0.004	0.193	0.567
162.m02911	CNAG_04259	YHR089C	GAR1	SPBC20F10.01	gar1	orf19.1164	ca1789	GAR1	KOG3262	J	H/ACA small nucleolar RNP component GAR1	small nucleolar RNP protein	Protein component of the H/ACA snoRNP pseudouridylase complex, involved in the modification and cleavage of the 18S pre-rRNA	snoRNP pseudouridylase complex protein Gar1	Nucleolar rRNA processing protein (by homology)	None	None	None	None	None	Cne_OxR-dw_2.0	None	Cne_OxSR-dw_2.0	-0.073	0.409	0.008	-0.558	0.516	0.08	-0.266	-0.052	-0.079	-0.049	-0.079	0.062	-0.236	0.106	-0.532	-0.21	-0.505	-0.112
162.m02912	CNAG_04264	YGR255C	COQ6	SPBC146.12	coq6	orf19.3058	ca5081	COQ6	KOG3855	HC	Monooxygenase involved in coenzyme Q (ubiquinone) biosynthesis	ubiquinone biosynthesis monooxygenase	Putative flavin-dependent monooxygenase, involved in ubiquinone (Coenzyme Q) biosynthesis; localizes to the matrix face of the mitochondrial inner membrane in a large complex with other ubiquinone biosynthetic enzymes	monooxygenase Coq6	monooxygenase (by homology)	None	None	None	None	None	Cne_OxR-dw_2.0	None	Cne_OxSR-dw_2.0	0.214	0.866	0.386	-0.382	0.775	0.092	0.207	0.136	0.168	0.189	-0.046	0.33	0.055	0.44	0.06	-0.024	0.543	0.052
162.m02913	CNAG_04266	YNL107W	YAF9	SPAC17G8.07	None	orf19.5501	None	None	KOG3149	K	Transcription initiation factor IIF, auxiliary subunit	YEATS family protein	Subunit of both the NuA4 histone H4 acetyltransferase complex and the SWR1 complex, may function to antagonize silencing near telomeres; interacts directly with Swc4p, has homology to human leukemogenic protein AF9, contains a YEATS domain	YEATS family histone acetyltransferase subunit (predicted)	None	None	None	None	None	None	None	None	None	-0.073	1.176	0.386	-0.294	0.53	0.055	-0.136	-0.207	0.091	0.148	0.159	-0.005	-0.008	-0.272	-0.192	-0.061	0.211	-0.187
162.m02914	CNAG_04269	YDR415C	None	None	None	orf19.2484	ca3805	IPF12403	KOG2195	OPR	Transferrin receptor and related proteins containing the protease-associated (PA) domain	peptidase	None	None	unknown function	None	None	None	None	Cne_OxR-up_2.0	None	Cne_OxSR-up_2.0	None	0.177	0.581	0.286	-0.211	0.368	0.181	0.267	0.051	-0.106	0.192	0.637	0.108	0.093	-0.016	-0.317	0.025	0.18	0.177
162.m02915	CNAG_04982	None	None	None	None	None	None	None	None	None	None	cytosine-purine permease	None	None	None	None	None	None	None	None	None	None	None	-0.058	1.068	0.486	-0.537	0.712	0.028	0.074	-0.37	0.148	0.016	0.58	0.481	0.164	-0.355	-0.077	-0.05	-0.259	-0.249
162.m02916	CNAG_04128	YDR183W	PLP1	SPAC2F3.12c	None	None	None	None	KOG1672	OC	ATP binding protein	GTPase inhibitor	Protein with a possible role in folding of beta-tubulin; has weak similarity to phosducins, which are G-protein regulators	conserved eukaryotic protein	None	None	None	None	None	None	None	None	None	0.004	1.002	0.347	-0.239	0.703	-0.092	0.072	0.223	-0.002	0.249	-0.014	0.197	-0.077	0.454	-0.23	-0.088	0.301	-0.012
162.m02917	CNAG_04122	YMR041C	ARA2	None	None	orf19.5665	ca4374	IPF5288	KOG1576	C	Predicted oxidoreductase	galactose dehydrogenase	NAD-dependent arabinose dehydrogenase, involved in biosynthesis of erythroascorbic acid; similar to plant L-galactose dehydrogenase	None	Unknown function	None	None	None	None	None	None	None	None	0.025	1.327	0.902	-0.279	0.579	0.445	0.319	0.173	-0.194	0.131	0.654	0.537	0.279	0.206	0.224	0.164	0.492	0.314
162.m02918	CNAG_04121	None	None	None	None	None	None	None	KOG1776	T	Zn-binding protein Push	conserved hypothetical protein	None	None	None	None	None	None	None	None	None	None	None	0.26	0.393	-0.051	-0.238	0.341	-0.163	-0.031	0.11	-0.75	0.219	0.031	-0.148	-0.223	0.317	-0.181	-0.115	-0.122	0.036
162.m02919	CNAG_04120	YMR277W	FCP1	SPAC19B12.05c	fcp1	orf19.6742	ca5952	IPF3503	KOG0323	K	TFIIF-interacting CTD phosphatases, including NLI-interacting factor	conserved hypothetical protein	Carboxy-terminal domain (CTD) phosphatase, essential for dephosphorylation of the repeated C-terminal domain of the RNA polymerase II large subunit (Rpo21p)	CTD phosphatase Fcp1	similar to Saccharomyces cerevisiae Fcp1p TFIIF interacting component of CTD phosphatase (by homology)	None	None	None	None	None	None	None	None	-0.079	1.115	0.149	-0.381	0.517	0.162	-0.143	-0.137	0.075	0.157	0.156	0.12	-0.038	-0.315	-0.113	-0.104	-0.008	-0.199
162.m02922	CNAG_07756	YGL116W	CDC20	SPAC821.08c	slp1	orf19.122	ca1218	CDC20	KOG0305	DO	Anaphase promoting complex, Cdc20, Cdh1, and Ama1 subunits	cell division control protein	Cell-cycle regulated activator of anaphase-promoting complex/cyclosome (APC/C), which is required for metaphase/anaphase transition; directs ubiquitination of mitotic cyclins, Pds1p, and other anaphase inhibitors; potential Cdc28p substrate	sleepy homolog Slp1	anaphase promoting complex subunit (by homology)	None	None	None	None	None	None	None	None	0.043	1.424	0.782	-0.25	0.283	0.435	0.297	-0.149	-0.091	0.226	0.798	0.388	0.405	0.106	0.254	0.119	0.753	0.238
162.m02927	CNAG_04108	None	None	SPAC644.11c	None	orf19.7281	ca5524	IPF2861	KOG0787	T	Dehydrogenase kinase	kinase	None	mitochondrial pyruvate dehydrogenase (lipoamide) kinase	putative pyruvate dehydrogenase kinase	None	Cne_OsR-dw_2.0	None	None	Cne_OxR-up_2.0	None	Cne_OxSR-up_2.0	Cne_OsSR-dw_2.0	0.12	0.822	0.261	-0.29	0.72	0.313	0.129	0.182	0.074	0.264	0.006	0.197	0.26	0.466	0.074	-0.027	0.742	0.104
162.m02928	CNAG_04110	YNL229C	URE2	SPCC965.07c	gst2	orf19.2693	ca3260	IPF7968	KOG0867	O	Glutathione S-transferase	glutathione S-transferase	Nitrogen catabolite repression transcriptional regulator that acts by inhibition of GLN3 transcription in good nitrogen source; altered form of Ure2p creates [URE3] prion	glutathione S-transferase Gst2	unknown function	None	None	Cne_FxR-up_2.0	None	Cne_OxR-up_2.0	None	None	None	0.136	0.486	-0.058	-0.458	0.327	-0.136	0.022	-0.289	-0.211	-0.016	0.517	-0.216	-0.081	-0.388	-0.36	-0.111	-0.761	-0.272
162.m02929	CNAG_04111	None	None	SPCC126.08c	None	orf19.2200	ca2436	IPF5500	KOG3839	U	Lectin VIP36, involved in the transport of glycoproteins carrying high mannose-type glycans	lectin	None	lectin (predicted)	unknown function	None	None	None	None	None	None	None	None	-0.09	0.988	0.311	-0.384	0.478	0.086	-0.123	-0.087	0.179	0.156	0.152	0.316	0.034	-0.261	-0.201	-0.115	0.128	-0.196
162.m02931	CNAG_04114	YLR048W	RPS0B	SPBC685.06	rps001	orf19.6975	None	None	KOG0830	J	40S ribosomal protein SA (P40)/Laminin receptor 1	40S ribosomal protein S0	Protein component of the small (40S) ribosomal subunit, nearly identical to Rps0Ap; required for maturation of 18S rRNA along with Rps0Ap; deletion of either RPS0 gene reduces growth rate, deletion of both genes is lethal	40S ribosomal protein S0A (p40)	None	None	None	None	None	None	Cne_OxR-dw_2.0	None	Cne_OxSR-dw_2.0	1.026	0.672	0.315	-0.304	-0.257	-0.328	-0.16	-0.357	-0.747	-0.017	-0.04	0.274	-0.41	-0.111	-0.385	-0.318	-0.651	-0.223
162.m02932	CNAG_04119	YLR371W	ROM2	SPCC645.07	rgf1	orf19.906	ca4668	ROM2	KOG4305	T	RhoGEF GTPase	rho guanyl-nucleotide exchange factor	GDP/GTP exchange protein (GEP) for Rho1p and Rho2p; mutations are synthetically lethal with mutations in rom1, which also encodes a GEP	RhoGEF for Rho1, Rgf1	GDP/GTP exchange factor for Rho1p (by homology)	None	None	None	None	None	None	None	None	0.068	-0.082	0.037	-0.378	0.287	-0.594	-0.403	-0.171	-0.312	0.155	0.131	-0.299	-0.308	-0.285	-0.683	-0.379	-0.136	-0.036
162.m02934	CNAG_04127	YLR323C	CWC24	SPBC13E7.02	cwf24	orf19.2105	ca2741	IPF10632	KOG1813	O	Predicted E3 ubiquitin ligase	spliceosomal zinc finger-containing protein	Essential protein, component of a complex containing Cef1p; has similarity to S. pombe Cwf24p	zf-C3HC4 type (RING finger)/GCN5-related N acetyltransferase fusion protein	unknown function	None	None	None	None	Cne_OxR-up_2.0	None	Cne_OxSR-up_2.0	None	-0.02	1.086	0.383	-0.577	0.439	0.024	0.098	-0.146	0.02	0.009	0.61	0.307	0.307	-0.363	0.007	-0.018	-0.411	-0.248
162.m02936	CNAG_04278	YDL164C	CDC9	SPAC20G8.01	cdc17	orf19.6155	ca3145	CDC9	KOG0967	L	ATP-dependent DNA ligase I	DNA ligase	DNA ligase found in the nucleus and mitochondria, an essential enzyme that joins Okazaki fragments during DNA replication; also acts in nucleotide excision repair, base excision repair, and recombination	ATP-dependent DNA ligase Cdc17	DNA ligase (by homology)	None	None	None	None	None	None	None	None	-0.157	1.121	0.555	-0.338	0.591	0.197	-0.097	-0.031	0.365	0.172	0.152	0.244	0.029	-0.218	-0.103	-0.08	0.401	-0.211
162.m02937	CNAG_04276	None	None	None	None	None	None	None	None	None	None	cytosine-purine permease	None	None	None	None	None	None	None	Cne_OxR-up_2.0	None	Cne_OxSR-up_2.0	None	0.022	1.117	0.361	-0.451	0.549	-0.045	-0.03	-0.147	-0.054	0.038	0.564	0.349	0.071	-0.506	-0.187	-0.144	-0.162	-0.239
162.m02939	CNAG_04272	None	None	SPACUNK12.02c	cmk1	None	None	None	KOG0032	T	Ca2+/calmodulin-dependent protein kinase, EF-Hand protein superfamily	CAMK/CAMK1 protein kinase	None	calcium/calmodulin-dependent protein kinase Cmk1	None	None	None	None	None	Cne_OxR-up_2.0	None	Cne_OxSR-up_2.0	None	0.08	0.798	0.202	-0.302	0.279	0.058	-0.218	-0.061	-0.062	0.154	0.122	0.096	-0.126	-0.306	-0.325	-0.116	0.017	-0.173
162.m02940	CNAG_04268	YBL019W	APN2	SPBC3D6.10	apn2	orf19.1836	ca2370	APN2	KOG1294	L	Apurinic/apyrimidinic endonuclease and related enzymes	DNA-(apurinic or apyrimidinic site) lyase	Class II abasic (AP) endonuclease involved in repair of DNA damage; homolog of human HAP1 and E. coli exoIII	AP-endonuclease Apn2	AP endonuclease, exonuclease III homologue (by homology)	None	None	None	None	Cne_OxR-up_2.0	None	Cne_OxSR-up_2.0	None	-0.115	1.113	0.356	-0.491	0.614	-0.098	0.086	-0.072	-0.304	-0.004	0.669	0.423	0.217	-0.423	-0.077	-0.035	-0.394	-0.204
162.m02941	CNAG_04267	YJR144W	MGM101	SPBC30D10.08	mgm101	orf19.2956	ca4177	MGM101	None	None	None	mitochondrial genome maintenance protein	Protein involved in mitochondrial genome maintenance; component of the mitochondrial nucleoid, required for the repair of oxidative mtDNA damage	mitochondrial DNA repair protein	mitochondrial genome maintenance protein (by homology)	None	None	None	None	None	None	None	None	-0.232	1.245	0.406	-0.359	0.709	0.221	-0.051	-0.402	0.353	0.063	0.113	0.325	0.287	0.121	-0.267	0.005	0.789	-0.144
162.m02942	CNAG_04265	YCL034W	LSB5	SPBC31F10.07	None	None	None	None	KOG1087	U	Cytosolic sorting protein GGA2/TOM1	conserved hypothetical protein	Protein of unknown function; binds Las17p, which is a homolog of human Wiskott-Aldrich Syndrome protein involved in actin patch assembly and actin polymerization	cortical component Lsb5 (predicted)	None	None	Cne_OsR-dw_2.0	None	None	None	None	None	Cne_OsSR-dw_2.0	-0.186	0.546	0.157	-0.456	0.791	0.145	0.03	0.026	0.311	-0.068	-0.137	0.028	0.323	0.407	-0.101	0.127	0.019	-0.016
162.m02943	CNAG_04260	None	None	SPAC4D7.09	tif223	orf19.481	ca4523	GCD1	KOG1462	J	Translation initiation factor 2B, gamma subunit (eIF-2Bgamma/GCD1)	translation initiation factor	None	translation initiation factor eIF2B	translation initiation factor eIF2bgamma (by homology)	None	None	None	None	None	None	None	None	-0.118	1.064	0.516	-0.317	0.646	0.294	-0.024	-0.315	0.188	0.039	0.162	0.256	0.203	0.149	-0.116	0.011	0.591	-0.102
162.m02944	CNAG_04258	None	None	None	None	None	None	None	KOG0070	U	GTP-binding ADP-ribosylation factor Arf1	ADP-ribosylation factor	None	None	None	None	None	None	None	None	None	None	None	0.169	0.966	0.29	-0.128	0.003	0.105	0.362	0.045	-0.639	0.161	0.642	0.239	0.043	0.015	0.168	0.057	0.103	0.147
162.m02947	CNAG_04252	None	None	None	None	None	None	None	None	None	None	family with sequence similarity 116	None	None	None	None	None	Cne_FxR-up_2.0	None	None	None	Cne_FxSR-up_2.0	None	-0.157	0.729	0.359	-0.442	0.643	0.207	0.148	0.01	0.062	-0.085	-0.036	0.073	0.348	0.402	-0.19	0.043	-0.103	-0.078
162.m02948	CNAG_04248	None	None	None	None	None	None	None	None	None	None	ubiquitin thioesterase otubain-like	None	None	None	None	Cne_OsR-dw_2.0	None	None	None	None	None	Cne_OsSR-dw_2.0	-0.084	0.94	0.299	-0.299	0.6	0.171	-0.044	-0.069	0.438	0.06	0.182	0.005	0.141	0.104	-0.263	-0.025	0.589	-0.141
162.m02952	CNAG_04237	None	None	None	None	None	None	None	None	None	None	conserved hypothetical protein	None	None	None	None	None	None	None	None	Cne_OxR-dw_2.0	None	Cne_OxSR-dw_2.0	0.233	0.643	0.219	-0.205	0.619	-0.007	0.086	0.162	0.296	0.283	0.03	0.278	-0.005	0.429	-0.113	-0.032	0.378	0.052
162.m02953	CNAG_04236	None	None	None	None	None	None	None	KOG3120	R	Predicted haloacid dehalogenase-like hydrolase	acid phosphatase	None	None	None	None	None	None	None	None	None	None	None	-0.014	0.267	0.013	-0.509	0.434	0.037	-0.35	-0.022	-0.315	-0.065	-0.009	-0.246	-0.146	0.095	-0.337	-0.215	-0.492	-0.039
162.m02956	CNAG_04230	YPL214C	THI6	SPAC23H4.10c	thi4	orf19.277	ca2777	THI6	None	None	None	thiamine biosynthetic bifunctional enzyme	Bifunctional enzyme with thiamine-phosphate pyrophosphorylase and 4-methyl-5-beta-hydroxyethylthiazole kinase activities, required for thiamine biosynthesis; GFP-fusion protein localizes to the cytoplasm in a punctate pattern	thiamine-phosphate dipyrophosphorylase/hydroxyethylthiazole kinase	thiamin-phosphate pyrophosphorylase and hydroxyethylthiazole kinase-like by homology	None	None	None	None	None	None	None	None	-0.132	1.199	0.446	-0.321	0.528	0.211	-0.103	-0.22	0.429	0.052	0.15	0.242	0.227	0.08	-0.138	-0.036	0.745	-0.153
162.m02957	CNAG_04118	YKL139W	CTK1	SPAC2F3.15	lsk1	orf19.1619	ca4014	CTK1	KOG0600	D	Cdc2-related protein kinase	CAMK/CDK/CRK7 protein kinase	Catalytic (alpha) subunit of C-terminal domain kinase I (CTDK-I), which phosphorylates the C-terminal repeated domain of the RNA polymerase II large subunit (Rpo21p) to affect both transcription and pre-mRNA 3' end processing	latrunculin sensitive kinase Lsk1	probable cell division protein kinase	None	None	None	None	None	None	None	None	-0.306	0.86	0.263	-0.5	0.611	0.198	0.165	0.046	0.194	-0.047	-0.158	0.152	0.272	0.276	-0.227	-0.003	-0.273	-0.148
162.m02958	None	None	None	None	None	None	None	None	None	None	None	None	None	None	None	None	None	None	None	None	None	None	None	0.241	0.982	0.838	-0.176	0.376	0.051	0.23	0.304	-0.178	0.202	0.687	0.689	0.663	-0.341	0.563	0.388	-0.105	0.279
162.m02959	None	None	None	None	None	None	None	None	None	None	None	None	None	None	None	None	None	None	None	None	Cne_OxR-dw_2.0	None	Cne_OxSR-dw_2.0	0.421	0.411	0.464	-0.192	0.371	0.18	0.676	0.878	0.379	0.438	-0.062	0.104	0.052	0.622	-0.027	0.139	-0.169	0.32
162.m02960	CNAG_04537	None	None	None	None	None	None	None	KOG1998	T	Signaling protein DOCK180	conserved hypothetical protein	None	None	None	None	None	None	None	None	None	None	None	0.24	0.703	0.269	-0.261	0.259	0.061	0.02	0.447	-0.183	0.279	0.054	0.198	0.232	-0.255	0.017	0.048	-0.35	-0.225
162.m02961	CNAG_04527	None	None	SPCC1753.05	rsm1	None	None	None	KOG4765	S	Uncharacterized conserved protein	conserved hypothetical protein	None	RNA export factor Rsm1	None	None	None	None	None	None	None	None	None	0.386	0.836	0.697	-0.113	0.364	0.15	0.186	0.215	1.152	0.18	0.547	0.607	0.732	-0.387	0.143	0.377	0.05	0.307
162.m02962	CNAG_04515	None	None	None	None	None	None	None	KOG2491	Y	Nuclear matrix protein	conserved hypothetical protein	None	None	None	None	None	None	None	None	None	None	None	0.197	0.364	-0.402	-0.312	0.134	0.119	-0.418	-0.348	-0.132	-0.018	0.263	-0.261	-0.374	-0.154	-0.502	-0.276	-0.184	-0.078
162.m02963	CNAG_04518	None	None	None	None	None	None	None	KOG1721	R	1 FOG: Zn-finger	conserved hypothetical protein	None	None	None	Cne_OsR-up_2.0	None	None	None	Cne_OxR-up_2.0	None	None	None	0.296	-0.168	0.248	-0.34	0.588	-0.656	-0.345	-0.231	-0.095	-0.074	0.046	-0.058	-0.374	-0.232	-0.549	-0.13	-0.29	0.011
162.m02964	CNAG_04523	None	None	None	None	None	None	None	KOG0657	G	Glyceraldehyde 3-phosphate dehydrogenase	glyceraldehyde 3-phosphate dehydrogenase	None	None	None	None	None	None	None	Cne_OxR-up_2.0	None	Cne_OxSR-up_2.0	None	-0.136	1.218	0.411	-0.381	0.765	0.242	-0.102	-0.118	0.388	0.041	0.166	0.184	0.231	0.212	-0.252	-0.078	0.514	-0.122
162.m02965	CNAG_04525	YLR088W	GAA1	SPAC1002.11	gaa1	orf19.5693	ca2612	GAA1	KOG3566	O	Glycosylphosphatidylinositol anchor attachment protein GAA1	GPI-anchor transamidase	Subunit of the GPI (glycosylphosphatidylinositol):protein transamidase complex, removes the GPI-anchoring signal and attaches GPI to proteins in the ER	GPI-anchor transamidase complex subunit Gaa1 (predicted)	required for attachment of GPI anchor onto proteins by homology	None	None	None	None	Cne_OxR-up_2.0	None	Cne_OxSR-up_2.0	None	-0.203	0.737	0.211	-0.538	0.86	0.276	0.053	-0.015	0.225	-0.014	-0.082	-0.155	0.377	0.327	-0.178	0.068	-0.128	-0.11
162.m02966	CNAG_04530	None	None	SPAC17C9.11c	None	None	None	None	KOG2689	O	Predicted ubiquitin regulatory protein	DNA-binding protein	None	zinc finger protein, zf-C2H2 type/UBA domain protein	None	None	None	None	None	None	None	None	None	1.322	-2.585	-1.485	0.485	-2.918	-1.27	<no data>	0.51	<no data>	2.524	0.184	-4.285	0	<no data>	0.415	0.564	<no data>	-1.126
162.m02967	CNAG_07778	YJR007W	SUI2	SPAC3G9.09c	tif211	orf19.6213	ca2573	SUI2	KOG2916	J	Translation initiation factor 2, alpha subunit (eIF-2alpha)	eukaryotic translation initiation factor 2 subunit alpha	Alpha subunit of the translation initiation factor eIF2, involved in the identification of the start codon; phosphorylation of Ser51 is required for regulation of translation by inhibiting the exchange of GDP for GTP	translation initiation factor eIF2 alpha subunit	translation initiation factor eIF2, alpha chain (by homology)	None	None	None	None	None	Cne_OxR-dw_2.0	None	Cne_OxSR-dw_2.0	0.166	0.839	0.179	-0.477	0.44	-0.043	0.018	-0.128	-0.517	0.037	0.58	0.269	-0.025	-0.427	-0.175	-0.128	-0.496	-0.265
162.m02968	CNAG_04504	None	None	None	None	None	None	None	None	None	None	conserved hypothetical protein	None	None	None	Cne_OsR-up_2.0	None	None	None	None	None	Cne_OsSR-up_2.0	None	0.201	0.87	0.421	-0.193	0.563	0.169	0.093	0.429	0.509	0.278	0.001	0.267	0.316	-0.179	0.325	0.032	-0.066	-0.188
162.m02969	CNAG_04502	YBR074W	None	SPCC1259.02c	None	orf19.2163	ca1134	IPF2702	KOG2194	OR	Aminopeptidases of the M20 family	conserved hypothetical protein	None	aminopeptidase (predicted)	unknown function	None	None	None	None	None	None	None	None	0.408	0.471	0.432	-0.114	0.319	0.116	0.009	0.318	-0.27	0.211	0.574	0.1	0.579	-0.407	-0.32	0.173	-0.272	0.242
162.m02970	CNAG_04493	None	None	None	None	None	None	None	KOG1863	O	Ubiquitin carboxyl-terminal hydrolase	ubiquitin specific peptidase 48	None	None	None	None	None	None	None	None	None	None	None	0.091	0.784	0.223	-0.254	0.417	-0.018	0.056	0.459	0.049	0.238	0.059	0.263	0.252	-0.326	0.163	0.094	-0.181	-0.221
162.m02971	CNAG_07773	None	None	SPAC926.06c	None	None	None	None	None	None	None	conserved hypothetical protein	None	leucine-rich repeat protein, unknown	None	None	None	None	None	Cne_OxR-up_2.0	None	Cne_OxSR-up_2.0	None	-0.124	1.193	0.404	-0.255	0.391	0.045	-0.156	-0.132	0.152	0.157	0.18	0.207	0.065	-0.403	-0.168	-0.057	0.328	-0.239
162.m02973	CNAG_04456	None	None	None	None	None	None	None	None	None	None	conserved hypothetical protein	None	None	None	None	None	None	None	None	None	None	None	0.426	0.345	0.483	-0.009	0.635	-0.376	0.249	0.595	-0.012	0.147	0.777	0.415	0.553	-0.224	0.43	0.436	-0.141	0.419
162.m02974	CNAG_04449	None	None	None	None	None	None	None	None	None	None	alpha-1,6-mannosyltransferase	None	None	None	None	None	None	None	None	None	None	None	-0.135	1.251	0.462	-0.51	0.53	0.05	0.072	-0.153	0.06	0.029	0.675	0.326	0.18	-0.437	-0.056	-0.067	-0.357	-0.252
162.m02975	CNAG_04449	None	None	None	None	None	None	None	None	None	None	alpha-1,6-mannosyltransferase	None	None	None	None	None	None	None	None	None	None	None	0.152	0.946	0.218	-0.257	0.713	0.268	0.193	0.543	-0.298	0.252	0.038	0.372	0.454	-0.248	0.087	0.073	-0.141	-0.152
162.m02976	CNAG_04449	None	None	None	None	None	None	None	None	None	None	alpha-1,6-mannosyltransferase	None	None	None	Cne_OsR-up_2.0	None	Cne_FxR-up_2.0	None	None	None	None	None	-0.118	1.29	0.451	-0.325	0.539	0.053	-0.176	-0.158	0.246	0.142	0.164	0.342	0.082	-0.47	-0.073	-0.117	0.264	-0.228
162.m02977	CNAG_04436	None	None	None	None	None	None	None	KOG1426	S	FOG: RCC1 domain	conserved hypothetical protein	None	None	None	None	None	Cne_FxR-up_2.0	None	Cne_OxR-up_2.0	None	None	None	-0.072	1.233	0.44	-0.427	0.428	0.034	0.127	-0.088	-0.508	0.024	0.723	0.3	0.167	-0.521	-0.107	-0.095	-0.482	-0.238
162.m02978	CNAG_04438	None	None	SPAC1687.04	None	None	None	None	KOG2545	S	Conserved membrane protein	prov protein	None	conserved eukaryotic protein	None	None	None	None	None	None	None	None	None	-0.059	0.993	0.342	-0.263	0.561	0.124	-0.155	-0.058	0.239	0.125	0.214	0.307	0.002	-0.461	-0.173	-0.105	0.17	-0.235
162.m02981	CNAG_07770	None	None	None	None	None	None	None	KOG0039	PQ	Ferric reductase, NADH/NADPH oxidase and related proteins	ferric reductase transmembrane component 2	None	None	None	Cne_OsR-up_2.0	None	None	None	None	None	Cne_OsSR-up_2.0	None	0.692	0.232	-0.06	-0.187	0.074	-0.218	0.337	0.866	-0.245	0.248	0.307	-0.132	-0.141	0.196	-0.265	0.098	-0.883	0.201
162.m02985	CNAG_04377	YOL138C	RTC1	SPAC4F8.11	None	None	None	None	KOG0269	S	WD40 repeat-containing protein	vacuolar protein	Putative protein of unknown function; may interact with ribosomes, based on co-purification experiments; null mutation suppresses cdc13-1 temperature sensitivity	WD repeat protein, human WDR24 family	None	None	None	None	None	None	None	None	None	0.333	0.572	0.532	-0.1	0.185	0.128	0.175	0.38	0.126	0.188	0.592	0.186	0.707	-0.296	-0.039	0.37	-0.221	0.126
162.m02987	CNAG_04377	YOL138C	RTC1	SPAC4F8.11	None	None	None	None	KOG0269	S	WD40 repeat-containing protein	vacuolar protein	Putative protein of unknown function; may interact with ribosomes, based on co-purification experiments; null mutation suppresses cdc13-1 temperature sensitivity	WD repeat protein, human WDR24 family	None	None	None	None	None	Cne_OxR-up_2.0	None	Cne_OxSR-up_2.0	None	0.863	0.068	-0.092	-0.212	0.01	-0.255	0.488	0.981	1.41	0.309	0.717	-0.043	0.382	-0.167	-0.014	0.201	-0.134	0.172
162.m02989	CNAG_04377	YOL138C	RTC1	SPAC4F8.11	None	None	None	None	KOG0269	S	WD40 repeat-containing protein	vacuolar protein	Putative protein of unknown function; may interact with ribosomes, based on co-purification experiments; null mutation suppresses cdc13-1 temperature sensitivity	WD repeat protein, human WDR24 family	None	None	None	None	None	Cne_OxR-up_2.0	None	Cne_OxSR-up_2.0	None	0.411	0.411	0.028	-0.255	0.526	0.166	0.032	0.546	0.305	0.306	0.065	0.289	0.179	-0.277	0.162	0.014	-0.179	-0.134
162.m02992	CNAG_04379	YJR044C	VPS55	SPAC630.11	vps55	orf19.7184	ca5313	IPF2163	KOG2174	T	Leptin receptor gene-related protein	conserved hypothetical protein	Late endosomal protein involved in late endosome to vacuole trafficking; functional homolog of human obesity receptor gene-related protein (OB-RGRP)	vacuolar sorting protein Vps55 (predicted)	unknown function	None	None	None	None	None	None	None	None	0.735	0.211	0.113	-0.238	0.169	0.073	-0.258	0.52	-0.484	0.154	0.398	0.173	0.868	-0.298	-0.05	-0.033	-0.416	0.241
162.m02995	CNAG_04394	None	None	None	None	None	None	None	None	None	None	conserved hypothetical protein	None	None	None	None	None	None	None	None	None	None	None	0.088	-0.007	-0.314	-0.132	0.366	-0.138	-0.668	0.158	-0.27	0.199	0.101	-0.12	-0.514	-0.891	-0.783	-0.787	-0.827	-0.248
162.m02996	CNAG_04409	None	None	None	None	None	None	None	KOG4390	P	Voltage-gated A-type K+ channel KCND	conserved hypothetical protein	None	None	None	None	Cne_OsR-dw_2.0	None	Cne_FxR-dw_2.0	None	None	None	None	0.001	0.839	0.221	-0.452	0.658	0.008	0.173	-0.04	-0.196	0.051	0.663	0.105	0.173	-0.519	-0.124	-0.069	-0.378	-0.237
162.m02997	CNAG_04361	None	None	None	None	None	None	None	None	None	None	conserved hypothetical protein	None	None	None	None	None	None	None	None	Cne_OxR-dw_2.0	None	Cne_OxSR-dw_2.0	0.385	0.613	0.191	-0.302	0.694	0.269	0.225	0.285	0.381	0.183	0.499	0.121	0.231	-0.068	-0.057	0.12	0.147	0.54
162.m02998	CNAG_04353	None	None	None	None	None	None	None	KOG1721	R	1 FOG: Zn-finger	conserved hypothetical protein	None	None	None	None	None	None	None	Cne_OxR-up_2.0	None	Cne_OxSR-up_2.0	None	-0.093	1.022	0.319	-0.159	0.57	0.139	-0.102	0.059	0.226	0.156	0.157	0.181	0.068	-0.525	-0.082	0.004	0.262	-0.252
162.m02999	CNAG_04345	None	None	None	None	None	None	None	None	None	None	specific RNA polymerase II transcription factor	None	None	None	None	None	None	None	None	None	None	None	0.09	0.903	0.26	-0.221	0.77	-0.36	0.094	0.182	0.278	0.278	0.097	0.289	0.033	0.439	-0.033	-0.1	0.48	-0.018
162.m03000	CNAG_04342	None	None	None	None	None	None	None	KOG0654	D	G2/Mitotic-specific cyclin A	conserved hypothetical protein	None	None	None	None	None	None	None	None	None	None	None	0.109	1.23	0.58	-0.268	1.207	0.312	0.267	0.888	0.009	0.194	0.719	0.425	0.197	-0.007	0.523	0.223	0.662	0.264
162.m03004	None	None	None	None	None	None	None	None	None	None	None	None	None	None	None	None	None	None	None	Cne_OxR-up_2.0	None	Cne_OxSR-up_2.0	None	-0.047	0.763	0.258	-0.451	0.54	0.007	0.063	-0.123	-0.099	0.029	0.757	0.26	0.054	-0.48	0.061	-0.053	-0.234	-0.213
162.m03005	CNAG_04341	YJL204C	RCY1	SPCC18.04	pof6	orf19.3203	ca2483	IPF19758	KOG3745	U	Exocyst subunit - Sec10p	f-box protein pof6	F-box protein involved in recycling plasma membrane proteins internalized by endocytosis; localized to sites of polarized growth	F-box protein Pof6	unknown function	None	None	None	None	None	None	None	None	0.062	1.107	0.529	-0.304	0.634	0.207	-0.105	0.036	0.257	0.14	0.197	0.335	0.098	-0.503	0	-0.047	0.291	-0.256
162.m03006	CNAG_04349	None	None	None	None	None	None	None	None	None	None	conserved hypothetical protein	None	None	None	None	None	None	None	None	None	None	None	0.194	0.438	0.059	-0.404	0.398	-0.097	0.049	-0.083	-0.225	0.026	0.654	-0.099	0.062	-0.466	-0.247	-0.094	-0.421	-0.22
162.m03010	CNAG_04359	YBL066C	SEF1	None	None	orf19.3753	ca2346	SEF1	None	None	None	prib protein	Putative transcription factor, has homolog in Kluyveromyces lactis	None	Putative transcription factor1	None	None	None	None	Cne_OxR-up_2.0	None	Cne_OxSR-up_2.0	None	-0.151	1.126	0.495	-0.298	0.667	0.116	0.012	-0.284	0.283	0.195	0.465	0.323	0.183	0.312	-0.157	-0.083	0.655	0.065
162.m03011	CNAG_04362	YOR046C	DBP5	SPBC12C2.06	None	orf19.1661	ca3464	DBP5	KOG0332	A	ATP-dependent RNA helicase	ATP-dependent RNA helicase DBP5	Cytoplasmic ATP-dependent RNA helicase of the DEAD-box family involved in mRNA export from the nucleus; involved in translation termination	ATP-dependent RNA helicase Dbp5	RNA helicase (by homology)	None	None	None	None	None	None	None	None	-0.043	0.744	0.245	-0.411	0.424	0.161	-0.073	-0.067	-0.096	0.07	0.018	0.066	-0.116	0.104	-0.304	-0.167	-0.011	-0.041
162.m03013	CNAG_04302	None	None	None	None	None	None	None	KOG1853	Z	LIS1-interacting protein NUDE	conserved hypothetical protein	None	None	None	None	None	None	None	None	None	None	None	-0.1	1.248	0.433	-0.323	0.563	0.253	0.08	-0.231	0.392	0.177	0.455	0.305	0.233	0.283	-0.017	-0.098	0.715	0.05
162.m03015	CNAG_04305	None	None	None	None	None	None	None	KOG1874	K	KEKE-like motif-containing transcription regulator (Rlr1)/suppressor of sin4	conserved hypothetical protein	None	None	None	None	None	None	None	Cne_OxR-up_2.0	None	Cne_OxSR-up_2.0	None	-0.235	1.213	0.397	-0.378	0.605	0.167	0.008	-0.041	0.248	0.127	0.031	0.263	0.219	0.216	-0.116	-0.097	0.424	-0.199
162.m03017	CNAG_04315	None	None	None	None	None	None	None	KOG1427	S	Uncharacterized conserved protein, contains RCC1 domain	RCC2 protein	None	None	None	None	Cne_OsR-dw_2.0	None	None	None	None	None	Cne_OsSR-dw_2.0	-0.14	0.876	0.203	-0.317	0.461	0.234	0.012	-0.206	0.245	0.172	0.435	-0.028	0.066	0.279	-0.012	-0.131	0.526	0.078
162.m03018	CNAG_04317	None	None	None	None	None	None	None	KOG2532	G	Permease of the major facilitator superfamily	conserved hypothetical protein	None	None	None	None	None	None	None	None	None	None	None	-0.06	1.156	0.613	-0.331	0.795	-0.294	0.104	0.167	1.116	0.306	-0.013	0.508	0.368	0.497	-0.104	-0.078	0.628	-0.114
162.m03019	CNAG_04324	None	None	None	None	None	None	None	None	None	None	Atg22B-1p	None	None	None	None	None	None	None	None	None	None	None	-0.283	1.16	0.384	-0.389	0.579	0.332	-0.002	-0.065	0.297	0.091	0.04	0.253	0.134	0.213	-0.093	-0.164	0.381	-0.213
162.m03020	CNAG_04329	None	None	None	None	None	None	None	None	None	None	conserved hypothetical protein	None	None	None	None	None	None	None	None	None	None	None	-0.1	1.228	0.499	-0.262	0.693	0.27	0.105	-0.079	0.176	0.11	0.471	0.246	0.184	0.284	-0.114	-0.098	0.645	0.009
162.m03024	CNAG_04289	None	None	None	None	None	None	None	KOG1003	Z	Actin filament-coating protein tropomyosin	conserved hypothetical protein	None	None	None	None	None	None	None	None	None	None	None	0.554	0.634	0.596	-0.139	0.635	0.123	0.124	0.492	0.007	0.126	0.328	0.317	0.135	-0.002	-0.042	0.076	0.146	0.426
162.m03025	CNAG_04284	None	None	SPAC23D3.01	None	None	None	None	None	None	None	conserved hypothetical protein	None	PWWP domain protein	None	None	None	None	None	None	None	None	None	0.203	0.74	0.102	-0.394	0.446	0.033	-0.053	-0.134	0.074	0.108	0.044	0.078	-0.069	0.16	-0.266	-0.118	0.062	-0.139
162.m03026	CNAG_04283	YPL221W	FLC1	SPAC1F7.03	pkd2	orf19.1813	ca0349	IPF19026	None	None	None	integral membrane protein	Putative FAD transporter; required for uptake of FAD into endoplasmic reticulum; involved in cell wall maintenance	TRP-like ion channel	unknown function	Cne_OsR-up_2.0	None	Cne_FxR-up_2.0	None	None	None	None	None	-0.039	1.002	0.208	-0.318	0.671	0.231	0.019	-0.061	0.268	0.146	0.48	-0.007	0.011	0.234	-0.204	-0.126	0.303	0.155
162.m03028	CNAG_07758	None	None	None	None	None	None	None	KOG4814	S	Uncharacterized conserved protein	conserved hypothetical protein	None	None	None	None	None	None	None	None	None	None	None	-0.145	0.828	-0.011	-0.314	0.662	0.31	0.002	0.106	-0.219	0.272	0.019	0.206	0.227	0.262	0.074	-0.156	0.399	-0.032
162.m03030	CNAG_07758	None	None	None	None	None	None	None	KOG4814	S	Uncharacterized conserved protein	conserved hypothetical protein	None	None	None	None	None	None	None	None	None	None	None	0.045	1.26	0.724	-0.124	0.808	0.407	0.364	0.164	0.036	0.157	0.663	0.529	0.33	-0.073	0.216	0.199	0.617	0.233
162.m03031	CNAG_04150	None	None	None	None	None	None	None	KOG3627	E	Trypsin	conserved hypothetical protein	None	None	None	None	None	Cne_FxR-up_2.0	None	None	None	Cne_FxSR-up_2.0	None	0.05	0.973	0.691	-0.236	0.672	0.232	0.125	0.276	0.534	0.269	0.007	0.364	0.309	0.384	-0.177	0.018	0.685	-0.057
162.m03032	CNAG_04146	None	None	None	None	None	None	None	KOG2084	B	Predicted histone tail methylase containing SET domain	conserved hypothetical protein	None	None	None	None	None	None	None	None	None	None	None	-0.209	1.019	-0.165	-0.379	0.35	0.083	-0.131	-0.109	-0.3	0.145	0.053	-0.132	-0.178	0.034	-0.604	-0.384	-0.228	-0.296
162.m03033	CNAG_04158	YBL008W	HIR1	SPBC31F10.13c	hip1	orf19.2099	ca2745	HIR1.3f	KOG0973	DK	Histone transcription regulator HIRA, WD repeat superfamily	transcription corepressor	Subunit of the HIR complex, a nucleosome assembly complex involved in regulation of histone gene transcription; contributes to nucleosome formation, heterochromatic gene silencing, and formation of functional kinetochores	hira protein Hip1	Histone transcription regulator (by homology)	None	None	None	None	None	None	None	None	-0.168	1.2	0.484	-0.376	0.685	0.219	-0.021	-0.235	0.199	0.13	0.447	0.184	0.111	0.255	-0.149	-0.173	0.565	0.096
162.m03035	CNAG_04173	None	None	None	None	None	None	None	None	None	None	conserved hypothetical protein	None	None	None	None	None	None	None	None	Cne_OxR-dw_2.0	None	Cne_OxSR-dw_2.0	-0.168	0.845	0.177	-0.367	0.505	0.138	0.051	-0.083	0.041	0.15	0.019	0.077	-0.031	0.229	-0.169	-0.144	0.213	-0.195
162.m03036	CNAG_04178	None	None	None	None	None	None	None	KOG3804	K	Transcription factor NERF and related proteins, contain ETS domain	conserved hypothetical protein	None	None	None	Cne_OsR-up_2.0	None	None	None	None	None	Cne_OsSR-up_2.0	None	0.082	0.87	0.485	-0.116	0.824	0.079	0.128	0.154	-0.215	0.162	0.681	0.284	-0.024	-0.25	-0.044	0.1	0.089	0.287
162.m03041	CNAG_04172	YDR362C	TFC6	SPBC21H7.05	sfc6	None	None	None	None	None	None	conserved hypothetical protein	One of six subunits of RNA polymerase III transcription initiation factor complex (TFIIIC); part of TFIIIC TauB domain that binds BoxB promoter sites of tRNA and other genes; cooperates with Tfc3p in DNA binding; human homolog is TFIIIC-110	transcription factor TFIIIC complex subunit Sfc6	None	None	None	None	None	None	None	None	None	0.053	0.936	0.049	-0.289	0.376	0.139	-0.192	-0.15	0.11	0.107	0.421	0.063	0.146	-0.817	-0.146	-0.111	-0.194	-0.21
162.m03045	CNAG_04161	None	None	None	None	None	None	None	KOG2071	A	mRNA cleavage and polyadenylation factor I/II complex, subunit Pcf11	conserved hypothetical protein	None	None	None	None	None	None	None	None	None	None	None	-0.089	1.202	0.488	-0.265	0.585	0.091	-0.025	-0.06	-0.085	0.137	0.114	0.36	0.062	-0.277	-0.083	-0.218	-0.283	-0.32
162.m03046	CNAG_04226	None	None	SPAC167.03c	snu66	None	None	None	KOG2217	A	U4/U6.U5 snRNP associated protein	conserved hypothetical protein	None	U4/U6 x U5 tri-snRNP complex subunit Snu66 (predicted)	None	None	None	None	None	Cne_OxR-up_2.0	None	Cne_OxSR-up_2.0	None	0.154	0.721	0.324	-0.292	0.698	0.18	0.035	0.184	0.159	0.33	0.056	0.212	0.116	0.33	-0.02	-0.067	0.351	0.077
162.m03577	CNAG_04227	None	None	None	None	None	None	None	None	None	None	conserved hypothetical protein	None	None	None	None	None	None	None	None	None	None	None	0.077	0.763	0.219	-0.269	0.536	0.182	-0.026	-0.017	0.354	0.155	0.422	0.094	0.13	-0.656	-0.041	-0.02	-0.113	-0.08
162.m03579	CNAG_04225	None	None	None	None	None	None	None	KOG2410	E	Gamma-glutamyltransferase	DUF1479 domain-containing protein	None	None	None	None	None	None	None	None	Cne_OxR-dw_2.0	None	Cne_OxSR-dw_2.0	0.035	1.35	0.619	-0.182	0.776	0.054	0.403	0.159	-0.312	0.14	0.644	0.319	0.47	-0.075	-0.026	0.182	0.511	0.225
162.m03580	CNAG_04218	None	None	None	None	None	None	None	None	None	None	conserved hypothetical protein	None	None	None	None	None	None	None	None	None	None	None	-0.109	1.077	0.517	-0.29	0.46	0.063	-0.039	-0.111	-0.07	0.116	0.167	0.465	0.028	-0.425	-0.082	-0.065	-0.312	-0.287
162.m03582	CNAG_04198	None	None	None	None	None	None	None	KOG1216	WV	von Willebrand factor and related coagulation proteins	conserved hypothetical protein	None	None	None	None	None	None	None	None	None	None	None	0.058	1.106	0.525	-0.309	0.64	0.122	-0.018	-0.086	0.376	0.122	0.408	0.361	0.174	-0.782	-0.05	0.057	-0.108	-0.358
162.m03587	CNAG_07763	None	None	None	None	None	None	None	KOG1721	R	1 FOG: Zn-finger	conserved hypothetical protein	None	None	None	None	None	None	None	Cne_OxR-up_2.0	None	Cne_OxSR-up_2.0	None	-0.122	0.943	0.314	-0.22	0.707	0.326	0.154	0.284	0.415	0.339	-0.057	0.289	0.262	0.425	0.011	0.007	0.388	0.011
162.m03588	CNAG_04257	None	None	None	None	None	None	None	None	None	None	conserved hypothetical protein	None	None	None	None	None	None	None	None	Cne_OxR-dw_2.0	None	Cne_OxSR-dw_2.0	0.713	0.62	0.505	-0.218	0.234	-0.305	0.214	0.062	-0.08	0.15	0.366	0.178	0.649	-0.396	-0.351	0.326	-0.567	0.082
162.m03592	CNAG_04274	YJR019C	TES1	None	None	orf19.5216	None	None	None	None	None	acyl-CoA thioesterase	Peroxisomal acyl-CoA thioesterase likely to be involved in fatty acid oxidation rather than fatty acid synthesis; conserved protein also found in human peroxisomes; TES1 mRNA levels increase during growth on fatty acids	None	None	None	None	None	None	None	None	None	None	-0.124	1.144	0.444	-0.336	0.509	0.136	-0.024	-0.121	0.107	0.115	0.153	0.145	0.189	-0.396	-0.073	0.006	-0.27	-0.337
162.m03594	CNAG_04263	None	None	None	None	None	None	None	KOG1601	K	GATA-4/5/6 transcription factors	conserved hypothetical protein	None	None	None	None	None	None	None	None	None	None	None	0.111	1.117	0.277	-0.246	0.383	0.076	-0.059	0.003	0.418	0.122	0.43	0.251	0.192	-0.767	-0.021	0.042	-0.08	-0.048
162.m03600	CNAG_04244	None	None	None	None	None	None	None	KOG2615	R	Permease of the major facilitator superfamily	conserved hypothetical protein	None	None	None	None	None	None	None	None	None	None	None	-0.02	0.725	0.243	-0.342	0.345	0.085	-0.064	-0.147	-0.025	0.12	0.177	0.145	0.042	-0.415	-0.134	-0.106	-0.327	-0.323
162.m03601	CNAG_04239	None	None	None	None	None	None	None	None	None	None	conserved hypothetical protein	None	None	None	None	None	None	None	None	None	None	None	0.117	1.295	0.591	-0.302	0.654	0.086	0.036	0.026	0.265	0.184	0.443	0.3	0.243	-0.669	0.102	0.124	0.015	-0.216
162.m03602	CNAG_04275	None	None	None	None	None	None	None	KOG2661	O	Peptidase family M48	metalloendopeptidase	None	None	None	None	Cne_OsR-dw_2.0	None	Cne_FxR-dw_2.0	None	None	None	None	-0.094	0.9	0.307	-0.348	0.397	0.047	-0.102	-0.142	0.024	0.117	0.169	0.347	0.169	-0.38	-0.096	-0.08	-0.048	-0.257
162.m03603	CNAG_04277	YIL047C	SYG1	SPCC1827.07c	None	orf19.768	ca1957	IPF3887	KOG1162	U	Predicted small molecule transporter	conserved hypothetical protein	Plasma membrane protein of unknown function; truncation and overexpression suppresses lethality of G-alpha protein deficiency	SPX/EXS domain protein	similar to Saccharomyces cerevisiae Syg1p plasma membrane protein of the major facilitator superfamily (by homology)	None	None	None	None	None	None	None	None	0.005	1.22	0.611	-0.225	0.663	0.185	0.031	-0.022	0.384	0.174	0.435	0.523	0.115	-0.708	0.228	0.049	-0.142	-0.211
162.m03604	CNAG_04279	None	None	None	None	None	None	None	KOG0864	U	Ran-binding protein RANBP1 and related RanBD domain proteins	conserved hypothetical protein	None	None	None	None	None	None	None	None	None	None	None	0.148	0.735	-0.267	-0.195	0.025	0.168	0.114	0.63	0.368	0.267	0.065	0.256	0.579	-0.333	0.372	0.168	0.326	-0.012
162.m03607	CNAG_04111	None	None	SPCC126.08c	None	orf19.2200	ca2436	IPF5500	KOG3839	U	Lectin VIP36, involved in the transport of glycoproteins carrying high mannose-type glycans	lectin	None	lectin (predicted)	unknown function	None	None	None	None	None	None	None	None	0.041	0.898	0.292	-0.305	0.394	0.109	-0.116	-0.16	-0.02	0.111	0.198	0.314	0.058	-0.457	-0.112	-0.1	-0.342	-0.329
162.m03611	CNAG_04478	None	None	None	None	None	None	None	KOG1808	R	AAA ATPase containing von Willebrand factor type A (vWA) domain	conserved hypothetical protein	None	None	None	None	None	None	None	None	None	None	None	-0.098	0.619	-0.253	-0.296	0.232	-0.1	-0.349	-0.29	-0.207	0.023	0.382	-0.325	-0.164	-0.063	-0.728	-0.406	-0.229	0.073
162.m04092	CNAG_04497	None	None	None	None	orf19.3328	ca2935	IPF11521	None	None	None	conserved hypothetical protein	None	None	unknown function	None	None	None	None	None	None	None	None	0.099	-0.334	-0.053	-0.142	0.16	-0.696	-0.553	0.194	-0.181	0.114	0.603	-0.175	0.607	-0.759	-0.818	-0.417	-0.607	0.024
162.m04093	CNAG_04485	YOR317W	FAA1	SPBP4H10.11c	lcf2	orf19.7592	ca5992	FAA4	KOG1180	I	Acyl-CoA synthetase	long-chain-fatty-acid-CoA-ligase	Long chain fatty acyl-CoA synthetase with a preference for C12:0-C16:0 fatty acids; involved in the activation of imported fatty acids; localized to both lipid particles and mitochondrial outer membrane; essential for stationary phase	long-chain-fatty-acid-CoA ligase	long-chain fatty acid--CoA ligase and synthetase 4 (by homology)	None	None	None	None	Cne_OxR-up_2.0	None	Cne_OxSR-up_2.0	None	0.044	0.619	0.088	-0.352	0.479	0.042	0.004	0.049	0.115	0.166	0.045	-0.058	-0.07	0.244	-0.25	-0.13	0.179	-0.106
162.m04095	CNAG_04381	YLR005W	SSL1	SPCC1682.07	ssl1	orf19.1457	ca4545	SSL1	KOG2807	KL	RNA polymerase II transcription initiation/nucleotide excision repair factor TFIIH, subunit SSL1	RNA polymerase II transcription factor	Component of the core form of RNA polymerase transcription factor TFIIH, which has both protein kinase and DNA-dependent ATPase/helicase activities and is essential for transcription and nucleotide excision repair; interacts with Tfb4p	transcription factor TFIIH complex subunit Ssl1	TFIIH subunit (transcription initiation factor), factor B	None	None	Cne_FxR-up_2.0	None	None	None	Cne_FxSR-up_2.0	None	0.331	0.636	0.116	-0.271	0.528	-0.164	0.262	0.678	0.515	0.307	0.129	0.187	0.47	-0.374	0.152	0.174	-0.235	-0.023
162.m04097	CNAG_04359	YBL066C	SEF1	None	None	orf19.3753	ca2346	SEF1	None	None	None	prib protein	Putative transcription factor, has homolog in Kluyveromyces lactis	None	Putative transcription factor1	None	None	Cne_FxR-up_2.0	None	Cne_OxR-up_2.0	None	None	None	-0.201	1.276	0.603	-0.309	0.638	0.188	-0.009	-0.114	0.415	0.169	0.428	0.303	0.176	0.124	-0.045	-0.139	0.626	0.099
162.m04099	CNAG_04350	None	None	None	None	None	None	None	KOG2258	C	Glycerophosphoryl diester phosphodiesterase	glycerophosphodiesterase	None	None	None	Cne_OsR-up_2.0	None	Cne_FxR-up_2.0	None	Cne_OxR-up_2.0	None	Cne_CSR-up_2.0	None	-0.176	0.648	0.04	-0.403	0.47	0.157	-0.012	0.026	0.309	0.145	0.086	0.109	-0.002	0.242	-0.23	-0.164	0.235	-0.217
162.m04100	CNAG_04341	YJL204C	RCY1	SPCC18.04	pof6	orf19.3203	ca2483	IPF19758	KOG3745	U	Exocyst subunit - Sec10p	f-box protein pof6	F-box protein involved in recycling plasma membrane proteins internalized by endocytosis; localized to sites of polarized growth	F-box protein Pof6	unknown function	None	None	None	None	None	None	None	None	-0.131	1.193	0.536	-0.287	0.721	0.191	0.058	-0.315	0.316	0.175	0.429	0.227	0.172	0.191	-0.128	-0.108	0.594	0.106
162.m04101	CNAG_04339	YBR102C	EXO84	None	None	orf19.135	ca1817	IPF7021	KOG2215	U	Exocyst complex subunit	nuclear mRNA splicing protein	Essential protein with dual roles in spliceosome assembly and exocytosis; the exocyst complex (Sec3p, Sec5p, Sec6p, Sec8p, Sec10p, Sec15p, Exo70p, and Exo84p) mediates polarized targeting of secretory vesicles to active sites of exocytosis	None	similar to Saccharomyces cerevisiae Exo84p exocyst protein essential for secretion (by homology)	None	None	None	None	None	None	None	None	-0.155	0.834	0.108	-0.392	0.435	0.081	-0.015	-0.021	0.134	0.177	0.055	-0.005	-0.052	0.191	-0.195	-0.13	0.166	-0.226
162.m04102	CNAG_04339	YBR102C	EXO84	None	None	orf19.135	ca1817	IPF7021	KOG2215	U	Exocyst complex subunit	nuclear mRNA splicing protein	Essential protein with dual roles in spliceosome assembly and exocytosis; the exocyst complex (Sec3p, Sec5p, Sec6p, Sec8p, Sec10p, Sec15p, Exo70p, and Exo84p) mediates polarized targeting of secretory vesicles to active sites of exocytosis	None	similar to Saccharomyces cerevisiae Exo84p exocyst protein essential for secretion (by homology)	None	None	None	None	Cne_OxR-up_2.0	None	Cne_OxSR-up_2.0	None	-0.152	1.214	0.596	-0.285	0.66	0.265	-0.013	-0.221	0.214	0.1	0.477	0.178	0.172	0.135	-0.12	-0.083	0.411	0
162.m04104	CNAG_04196	YDL029W	ARP2	SPAC11H11.06	arp2	orf19.7292	ca5532	ARP2	KOG0677	Z	Actin-related protein Arp2/3 complex, subunit Arp2	actin binding protein	Essential component of the Arp2/3 complex, which is a highly conserved actin nucleation center required for the motility and integrity of actin patches; involved in endocytosis and membrane growth and polarity	ARP2/3 actin-organizing complex subunit Arp2	actin-like protein (by homology)	None	None	None	None	None	None	None	None	0.813	0.626	0.443	-0.07	-0.11	-0.297	0.294	0.266	-0.158	0.157	0.448	0.333	1.008	-0.2	-0.109	0.268	-0.257	0.416
162.m04510	CNAG_04529	YJL003W	COX16	SPAC1486.08	None	orf19.7665	ca6049	IPF4935	None	None	None	cytochrome c oxidase-assembly factor COX16	Mitochondrial inner membrane protein, required for assembly of cytochrome c oxidase	mitochondrial inner membrane protein involved in cytochrome c oxidase assembly Cox16	unknown function	None	None	None	None	None	None	None	None	0.122	0.973	1.532	-0.212	-0.175	0.01	0.265	0.518	-0.216	0.325	0.083	0.182	0.391	-0.357	0.256	0.166	-0.541	0.113
162.m04511	CNAG_04512	None	None	SPAC4D7.10c	None	orf19.422	ca0180	SPT20	None	None	None	conserved hypothetical protein	None	SAGA complex subunit Spt20 (predicted)	transcription factor, member of the histone acetyltransferase SAGA complex (by homology)	None	None	None	None	None	None	None	None	-0.197	1.181	0.539	-0.322	0.562	0.191	0.005	0.034	0.288	0.146	0.032	0.402	0.154	0.278	-0.248	-0.099	0.39	-0.231
162.m04512	CNAG_04526	None	None	None	None	None	None	None	None	None	None	conserved hypothetical protein	None	None	None	None	None	None	None	None	None	None	None	-0.145	1.158	0.445	-0.309	0.774	0.258	-0.015	-0.279	0.186	0.139	0.46	0.247	0.161	0.103	-0.033	-0.16	0.599	-0.051
162.m04513	CNAG_06525	None	None	None	None	None	None	None	KOG1991	YU	Nuclear transport receptor RANBP7/RANBP8 (importin beta superfamily)	nuclear protein	None	None	None	None	None	None	None	None	None	None	None	0.438	0.368	0.401	-0.145	0.067	-0.139	0.218	0.359	-0.21	0.171	0.579	0.095	0.76	-0.275	-0.199	0.309	-0.58	0.018
162.m04514	CNAG_04528	None	None	None	None	None	None	None	KOG4475	RP	FOG: Immunoglobin and related proteins	conserved hypothetical protein	None	None	None	None	None	None	None	None	None	None	None	0.282	-0.759	-0.125	-0.193	0.024	-0.874	-0.476	-0.406	-0.422	0.082	0.097	-0.518	-0.653	-0.305	-1.186	-0.371	-0.458	0.005
162.m04516	None	None	None	None	None	None	None	None	None	None	None	None	None	None	None	None	None	None	None	None	None	None	None	0.034	1.126	-0.29	-0.179	0	0.434	0.291	0.64	-0.049	0.239	0.066	-0.18	0.567	-0.246	0.142	0.188	0.021	-0.038
162.m04517	CNAG_04473	None	None	None	None	None	None	None	None	None	None	conserved hypothetical protein	None	None	None	None	None	None	None	None	None	None	None	-0.145	1.302	0.548	-0.266	0.703	0.317	-0.097	-0.303	0.293	0.124	0.436	0.319	0.128	0.07	-0.167	-0.167	0.656	-0.035
162.m04518	CNAG_04475	None	None	SPAC5H10.03	None	None	None	None	KOG4754	G	Predicted phosphoglycerate mutase	conserved hypothetical protein	None	phosphoglycerate mutase family	None	None	None	None	None	Cne_OxR-up_2.0	None	Cne_OxSR-up_2.0	None	-0.174	0.889	0.184	-0.397	0.484	0.133	0.007	-0.073	-0.015	0.142	0.011	0.026	0.059	0.264	-0.297	-0.158	0.104	-0.211
162.m04521	CNAG_04432	None	None	None	None	None	None	None	KOG4500	T	Rho/Rac GTPase guanine nucleotide exchange factor smgGDS/Vimar	conserved hypothetical protein	None	None	None	None	None	None	None	None	None	None	None	0.077	1.079	0.525	-0.245	0.621	-0.002	0.017	0.094	0.313	0.157	0.414	0.227	0.068	-0.813	-0.221	0.045	-0.205	-0.156
162.m04522	CNAG_04411	None	None	None	None	None	None	None	KOG0266	R	WD40 repeat-containing protein	conserved hypothetical protein	None	None	None	None	None	None	None	None	None	None	None	0.371	0.602	0.48	-0.233	-0.706	0.023	0.347	0.623	0.043	0.164	0.553	0.464	1.318	-0.353	0.066	0.504	-0.469	0.044
162.m04523	CNAG_04408	YLR133W	CKI1	SPAC13G7.12c	None	orf19.6966	ca5014	IPF11120	KOG2686	M	Choline kinase	choline kinase	Choline kinase, catalyzing the first step in phosphatidylcholine synthesis via the CDP-choline (Kennedy pathway); exhibits some ethanolamine kinase activity contributing to phosphatidylethanolamine synthesis via the CDP-ethanolamine pathway	choline kinase (predicted)	similar to Saccharomyces cerevisiae Cki1p choline kinase (by homology)	None	None	None	None	None	None	None	None	0.493	0.723	0.088	-0.208	0.103	-0.16	0.358	0.544	-0.291	0.246	0.132	0.245	0.457	-0.252	-0.107	0.178	-0.33	0.19
162.m04524	CNAG_04403	None	None	SPBC337.12	None	orf19.2393	ca2094	IPF11493	KOG1492	R	C3H1-type Zn-finger protein	CCCH zinc finger protein	None	human ZC3H3 homolog	unknown function	None	None	None	None	Cne_OxR-up_2.0	None	Cne_OxSR-up_2.0	None	0.347	0.393	0.364	-0.21	0.62	-0.108	0.358	0.808	0.031	0.176	0.625	-0.047	0.925	-0.465	0.016	0.561	-0.644	-0.202
162.m04525	CNAG_04397	None	None	None	None	None	None	None	KOG0527	K	HMG-box transcription factor	conserved hypothetical protein	None	None	None	None	None	None	None	Cne_OxR-up_2.0	None	Cne_OxSR-up_2.0	None	-0.363	-1.17	-3.907	0.807	<no data>	0.363	<no data>	0.585	<no data>	-4.248	-4.7	0.807	1.379	<no data>	<no data>	1	<no data>	<no data>
162.m04526	CNAG_04394	None	None	None	None	None	None	None	None	None	None	conserved hypothetical protein	None	None	None	None	None	None	None	None	None	None	None	0.118	1.145	0.431	-0.293	0.381	0.312	0.107	0.376	0.346	0.022	0.242	0.343	0.447	0.426	0.011	0.1	0.837	0.247
162.m04527	CNAG_04382	None	None	None	None	None	None	None	None	None	None	conserved hypothetical protein	None	None	None	Cne_OsR-up_2.0	None	None	None	None	None	Cne_OsSR-up_2.0	None	0.089	0.752	0.384	-0.307	0.419	0.037	-0.035	-0.043	0.114	0.122	0.173	0.306	0.171	-0.368	-0.033	-0.003	-0.285	-0.331
162.m04528	CNAG_04386	None	None	None	None	None	None	None	None	None	None	conserved hypothetical protein	None	None	None	None	None	None	None	None	None	None	None	-0.028	-0.15	-0.322	-0.478	0.721	0.22	0.167	0.179	0.172	0.121	0.026	-0.603	0.497	0.243	-0.054	0.239	-0.157	0.195
162.m04530	CNAG_04398	YDR421W	ARO80	None	None	orf19.3012	ca5048	IPF20024	None	None	None	specific RNA polymerase II transcription factor	Zinc finger transcriptional activator of the Zn2Cys6 family; activates transcription of aromatic amino acid catabolic genes in the presence of aromatic amino acids	None	unknown function	None	None	None	None	None	None	None	None	0.063	1.056	0.539	-0.226	0.734	0.169	0.064	0.131	0.438	0.179	0.443	0.227	0.058	-0.608	-0.007	0.058	-0.048	-0.095
162.m04531	CNAG_04410	YGR263C	SAY1	None	None	orf19.3924	ca2233	IFJ3	KOG1515	V	Arylacetamide deacetylase	endoplasmic reticulum protein	Sterol deacetylase; component of the sterol acetylation/deacetylation cycle along with Atf2p; integral membrane protein with active site in the ER lumen; green fluorescent protein (GFP)-fusion protein localizes to the endoplasmic reticulum	None	unknown function	None	None	None	None	None	None	None	None	-0.101	0.905	0.362	-0.365	0.583	0.1	-0.133	-0.032	-0.145	0.109	0.195	0.188	0.098	-0.526	-0.274	-0.16	-0.266	-0.331
162.m04532	CNAG_04367	YIL096C	None	SPCC1919.13c	None	orf19.7366	ca5664	IPF1252	KOG4174	S	Uncharacterized conserved protein	conserved hypothetical protein	None	conserved eukaryotic protein	Conserved hypothetical protein	None	None	None	None	None	None	None	None	0.024	1.249	0.755	-0.318	0.978	0.338	0.084	0.188	0.584	0.03	0.217	0.422	0.531	0.402	0.013	0.177	1.104	-0.004
162.m04533	CNAG_04360	YHR070W	TRM5	SPAPB18E9.01	trm5	orf19.1305	ca1327	IPF6680	None	None	None	tRNA methyltransferase	tRNA(m(1)G37)methyltransferase, methylates a tRNA base adjacent to the anticodon that has a role in prevention of frameshifting; highly conserved across Archaea, Bacteria, and Eukarya	tRNA (guanine) methyltransferase Trm5 (predicted)	unknown function	None	None	None	None	None	Cne_OxR-dw_2.0	None	Cne_OxSR-dw_2.0	-0.013	1.326	0.463	-0.358	0.983	0.979	0.281	0.298	0.846	0.143	0.033	0.264	0.555	0.449	0.14	0.216	-0.054	-0.078
162.m04534	CNAG_04355	None	None	None	None	None	None	None	KOG1870	O	Ubiquitin C-terminal hydrolase	conserved hypothetical protein	None	None	None	None	None	None	None	None	None	None	None	0.039	1.27	0.702	-0.332	1.109	0.417	0.159	0.328	1.028	0.015	0.162	0.384	0.549	0.464	-0.008	0.132	1.1	0.129
162.m04537	CNAG_04335	YLR305C	STT4	SPBC577.06c	None	orf19.1814	ca0324	STT4	KOG0902	T	Phosphatidylinositol 4-kinase	phosphatidylinositol 4-kinase	Phosphatidylinositol-4-kinase that functions in the Pkc1p protein kinase pathway; required for normal vacuole morphology, cell wall integrity, and actin cytoskeleton organization	phosphatidylinositol kinase (predicted)	Phosphatidylinositol-4-kinase (by homology)	None	None	None	None	None	None	None	None	0.181	0.73	0.24	-0.344	0.675	-0.061	0.239	0.341	0.387	0.128	0.075	0.103	0.074	0.407	0.037	0.126	-0.079	0.067
162.m04538	CNAG_04336	None	None	None	None	None	None	None	None	None	None	single-stranded nucleic acid binding protein	None	None	None	None	None	None	None	None	None	None	None	0.16	1.261	0.565	-0.245	0.498	0.092	0.04	0.214	0.357	0.163	0.413	0.285	0.251	-0.661	0.028	0.146	-0.041	-0.138
162.m04539	CNAG_04357	None	None	None	None	None	None	None	None	None	None	conserved hypothetical protein	None	None	None	None	None	None	None	None	None	None	None	-0.017	1.231	0.703	-0.272	0.926	0.319	0.129	0.405	0.529	0.041	0.194	0.451	0.354	0.449	-0.04	0.186	0.849	0.221
162.m04540	CNAG_04363	None	None	None	None	None	None	None	KOG0619	R	FOG: Leucine rich repeat	conserved hypothetical protein	None	None	None	None	None	None	None	None	None	None	None	-0.146	1.357	0.055	-0.417	0.816	0.434	0.345	0.354	0.836	0.154	0.055	-0.021	0.671	0.418	0.127	0.228	0.113	0.018
162.m04541	CNAG_04323	None	None	None	None	None	None	None	None	None	None	DUF1212 family protein	None	None	None	Cne_OsR-up_2.0	None	None	None	None	None	Cne_OsSR-up_2.0	None	0.142	0.992	0.418	-0.308	0.563	0.45	0.145	0.147	0.571	0.134	0.197	0.193	0.349	0.4	0.038	0.132	0.731	0.15
162.m04542	CNAG_04318	YGR099W	TEL2	SPAC458.03	tel2	orf19.7101	ca5598	IPF562	KOG4346	S	Uncharacterized conserved protein	telomeric DNA binding protein	Essential DNA-binding protein specific to single-stranded yeast telomeric DNA repeats, required for telomere length regulation and telomere position effect	Tel2/Rad-5/Clk-2 family protein Tel2	unknown function	None	None	None	None	None	None	None	None	0.021	1.132	0.274	-0.407	0.846	0.377	0.257	0.361	0.524	0.137	0.065	0.135	0.622	0.37	0.123	0.198	-0.075	-0.127
162.m04543	CNAG_04314	YEL041W	YEF1	SPAC3H5.11	None	None	None	None	KOG2178	G	Predicted sugar kinase	NAD+ kinase	ATP-NADH kinase; phosophorylates both NAD and NADH; homooctameric structure consisting of 60-kDa subunits; sequence similarity to Utr1p and Pos5p; overexpression complements certain pos5 phenotypes	NAD/NADH kinase (predicted)	None	None	None	None	Cne_FxR-dw_2.0	None	None	None	Cne_FxSR-dw_2.0	0.047	0.196	-0.25	-0.295	0.681	0.454	0.014	0.198	0.579	0.129	0.196	-0.303	0.13	0.278	-0.103	0.181	0.353	0.451
162.m04546	CNAG_04316	YJR049C	UTR1	SPAC1B1.02c	None	orf19.7393	ca5692	UTR1	KOG2178	G	Predicted sugar kinase	NAD+ kinase	ATP-NADH kinase; phosphorylates both NAD and NADH; active as a hexamer; enhances the activity of ferric reductase (Fre1p)	NAD/NADH kinase (predicted)	Associated with ferric reductase activity (by homology)	None	None	None	None	None	None	None	None	0.08	0.839	0.1	-0.282	0.451	0.017	-0.218	0.033	0.122	0.126	0.219	0.089	0.155	-0.48	-0.177	-0.017	-0.243	-0.28
162.m04547	CNAG_04316	YJR049C	UTR1	SPAC1B1.02c	None	orf19.7393	ca5692	UTR1	KOG2178	G	Predicted sugar kinase	NAD+ kinase	ATP-NADH kinase; phosphorylates both NAD and NADH; active as a hexamer; enhances the activity of ferric reductase (Fre1p)	NAD/NADH kinase (predicted)	Associated with ferric reductase activity (by homology)	None	None	None	None	Cne_OxR-up_2.0	None	Cne_OxSR-up_2.0	None	0.08	0.994	0.448	-0.205	0.541	0.098	0.042	0.166	0.252	0.174	0.463	0.187	0.136	-0.695	-0.085	0.031	-0.08	-0.069
162.m04549	CNAG_04319	None	None	None	None	None	None	None	KOG4828	S	Uncharacterized conserved protein	conserved hypothetical protein	None	None	None	None	None	None	None	None	None	None	None	0.012	1.037	0.424	-0.373	0.458	0.135	-0.186	-0.023	0.012	0.121	0.227	0.371	0.221	-0.429	-0.02	0.046	-0.293	-0.327
162.m04550	CNAG_04331	None	None	None	None	None	None	None	KOG1999	K	RNA polymerase II transcription elongation factor DSIF/SUPT5H/SPT5	conserved hypothetical protein	None	None	None	None	None	None	None	None	None	None	None	-0.139	1.161	0.309	-0.359	0.746	0.47	0.079	0.388	0.655	0.148	-0.029	0.166	0.529	0.319	0.017	0.123	0.104	0.017
162.m04551	None	None	None	None	None	None	None	None	None	None	None	None	None	None	None	None	None	None	None	None	None	None	None	0.519	1.108	0.181	-0.101	0.263	-0.713	0.606	1.316	-0.613	0.249	0.429	-0.274	0.525	-0.009	-0.294	0.732	-0.179	0.143
162.m04552	CNAG_07757	None	None	None	None	None	None	None	KOG2675	ZT	Adenylate cyclase-associated protein (CAP/Srv2p)	conserved hypothetical protein	None	None	None	None	None	None	None	None	None	None	None	0.478	0.193	-0.626	-0.27	-0.143	0.367	0.591	1.339	-0.737	0.343	0.868	0.257	0.679	0.002	0.134	0.441	-0.291	0.346
162.m04553	CNAG_04137	None	None	None	None	None	None	None	None	None	None	conserved hypothetical protein	None	None	None	None	None	None	None	None	None	None	None	0.172	0.832	0.487	-0.187	0.62	0.019	-0.068	0.051	0.216	0.151	0.447	0.205	0.249	-0.701	-0.152	-0.002	-0.129	-0.049
162.m04554	CNAG_04163	None	None	None	None	None	None	None	KOG1217	T	Fibrillins and related proteins containing Ca2+-binding EGF-like domains	conserved hypothetical protein	None	None	None	None	None	None	None	None	None	None	None	0.066	0.15	-0.033	-0.517	0.694	0.135	-0.025	-0.023	0.226	0.123	0.255	-0.153	0.246	-0.359	-0.024	0.068	-0.201	-0.067
162.m04556	CNAG_04166	YLR016C	PML1	None	None	None	None	None	KOG1882	T	Transcriptional regulator SNIP1, contains FHA domain	FHA domain containing protein	Subunit of the RES complex, which is required for nuclear retention of unspliced pre-mRNAs; acts in the same pathway as Pml39p and Mlp1p	None	None	None	None	None	None	None	None	None	None	0.26	0.908	0.567	-0.251	0.624	0.096	0.07	0.323	0.396	0.14	0.103	0.451	0.152	-0.393	0.022	-0.004	0.599	-0.156
162.m04558	CNAG_04186	None	None	None	None	None	None	None	KOG1083	K	Putative transcription factor ASH1/LIN-59	conserved hypothetical protein	None	None	None	None	None	None	None	Cne_OxR-up_2.0	None	Cne_OxSR-up_2.0	None	0.236	0.897	0.444	-0.207	0.374	-0.041	-0.038	0.086	0.044	0.114	0.408	0.292	0.3	-0.724	-0.181	0.016	-0.212	-0.114
162.m04559	CNAG_04185	None	None	None	None	None	None	None	None	None	None	conserved hypothetical protein	None	None	None	None	None	None	None	Cne_OxR-up_2.0	None	Cne_OxSR-up_2.0	None	0.017	0.895	0.273	-0.184	0.537	0.005	0.102	0.001	-0.135	0.106	0.267	0.195	0.091	-0.481	0.087	-0.018	-0.235	-0.34
162.m04560	CNAG_04174	YNL329C	PEX6	SPAC17A5.01	pex6	orf19.3573	ca3485	IPF3213	KOG0736	O	Peroxisome assembly factor 2 containing the AAA+-type ATPase domain	peroxisome assembly factor-2	AAA-peroxin that heterodimerizes with AAA-peroxin Pex1p and participates in the recycling of peroxisomal signal receptor Pex5p from the peroxisomal membrane to the cystosol	peroxin-6 (predicted)	similar to Saccharomyces cerevisiae Pex6p peroxisomal assembly protein (by homology)	None	None	None	None	None	None	None	None	-0.12	1.25	0.556	-0.287	0.698	0.187	-0.094	-0.195	0.215	0.11	0.45	0.168	0.132	0.181	-0.327	-0.139	0.539	-0.098
162.m04561	CNAG_04167	None	None	None	None	None	None	None	KOG1315	R	Predicted DHHC-type Zn-finger protein	conserved hypothetical protein	None	None	None	None	None	None	None	Cne_OxR-up_2.0	None	Cne_OxSR-up_2.0	None	0.316	0.376	0.105	-0.377	0.237	0.097	0.139	0.358	-0.031	0.093	0.772	-0.043	0.103	-0.321	0.183	0.04	-0.327	-0.102
162.m04562	CNAG_04201	None	None	None	None	None	None	None	None	None	None	conserved hypothetical protein	None	None	None	None	None	None	None	None	None	None	None	0.055	1.232	0.362	-0.261	0.857	0.094	0.037	0.234	0.447	0.158	0.134	0.529	0.194	-0.462	0.098	-0.082	0.508	0.004
162.m04563	CNAG_04220	YMR284W	YKU70	SPCC126.02c	pku70	orf19.1135	None	None	KOG2327	L	DNA-binding subunit of a DNA-dependent protein kinase (Ku70 autoantigen)	Ku70 protein	Subunit of the telomeric Ku complex (Yku70p-Yku80p), involved in telomere length maintenance, structure and telomere position effect; relocates to sites of double-strand cleavage to promote nonhomologous end joining during DSB repair	Ku domain protein Pku70	None	None	None	None	None	Cne_OxR-up_2.0	None	Cne_OxSR-up_2.0	None	-0.206	0.994	0.352	-0.416	0.506	0.273	0.011	-0.113	0.199	0.154	0.016	0.209	0.15	0.287	-0.134	-0.11	0.332	-0.229
162.m04564	CNAG_04231	None	None	None	None	None	None	None	KOG4640	DO	Anaphase-promoting complex (APC), subunit 4	conserved hypothetical protein	None	None	None	None	None	None	None	None	None	None	None	0.092	1.12	0.685	-0.33	0.686	0.192	0.176	0.52	0.15	0.09	0.684	0.625	0.344	-0.21	0.161	0.092	0.24	-0.06
162.m04565	CNAG_04235	YPR100W	MRPL51	SPBC19C2.12	mrpl51	None	None	None	KOG3445	J	Mitochondrial/chloroplast ribosomal protein 36a	conserved hypothetical protein	Mitochondrial ribosomal protein of the large subunit	mitochondrial ribosomal protein subunit L51	None	None	None	None	None	None	Cne_OxR-dw_2.0	None	Cne_OxSR-dw_2.0	0.371	0.813	0.428	-0.208	0.415	0.069	0.02	0.35	0.045	0.177	0.188	0.323	-0.003	-0.346	-0.156	-0.023	0.148	0.001
162.m04566	CNAG_04242	None	None	None	None	None	None	None	None	None	None	Si:XX-184l24.3 protein	None	None	None	None	None	None	None	None	None	None	None	0.031	1.029	0.752	-0.492	0.739	0.165	0.226	0.471	-0.081	0.138	0.823	0.169	0.436	-0.293	0.458	0.041	-0.454	-0.315
162.m04568	CNAG_04247	None	None	None	None	None	None	None	KOG4775	D	Uncharacterized protein SFI1 involved in G(2)-M transition	conserved hypothetical protein	None	None	None	None	None	None	None	None	None	None	None	0.245	1.424	0.582	-0.274	0.956	0.305	0.161	0.244	0.499	0.196	0.143	0.711	0.164	-0.343	0.433	0.042	0.491	-0.098
162.m04569	CNAG_04271	None	None	None	None	None	None	None	None	None	None	conserved hypothetical protein	None	None	None	Cne_OsR-up_2.0	None	None	None	Cne_OxR-up_2.0	None	None	None	0.304	0.484	0.329	-0.371	0.368	0.085	0.135	0.498	-0.079	0.152	0.861	0.167	0.165	-0.432	-0.018	-0.018	-0.252	-0.225
162.m04571	None	None	None	None	None	None	None	None	None	None	None	None	None	None	None	None	None	None	None	None	None	None	None	0.074	1.503	0.786	-0.288	0.766	0.289	0.164	0.331	0.546	0.195	0.178	0.63	0.273	-0.469	0.343	0.088	0.578	-0.153
162.m04573	CNAG_04113	None	None	None	None	None	None	None	KOG1716	V	Dual specificity phosphatase	conserved hypothetical protein	None	None	None	Cne_OsR-up_2.0	None	None	None	Cne_OxR-up_2.0	None	None	None	0.403	0.483	0.613	-0.431	0.661	0.086	-0.034	0.292	0.184	0.092	0.608	0.314	0.091	-0.101	0.148	0.029	0.067	0.077
162.m04574	CNAG_04107	None	None	None	None	None	None	None	KOG4628	O	Predicted E3 ubiquitin ligase	conserved hypothetical protein	None	None	None	None	None	None	None	None	None	None	None	0.211	0.569	0.316	-0.272	0.627	0.023	0.006	0.232	0.311	0.151	0.183	0.144	0.158	-0.517	-0.112	-0.089	0.345	-0.039
162.m04575	CNAG_04112	None	None	None	None	None	None	None	KOG1577	R	Aldo/keto reductase family proteins	oxidoreductase	None	None	None	None	None	None	Cne_FxR-dw_2.0	None	None	None	Cne_FxSR-dw_2.0	0.234	0.201	-0.08	-0.454	0.681	0.153	-0.403	0.137	0.169	0.097	0.62	0.084	-0.142	-0.548	-0.252	-0.403	0.115	-0.13
162.m04576	CNAG_04115	None	None	None	None	None	None	None	KOG4197	R	FOG: PPR repeat	conserved hypothetical protein	None	None	None	None	None	None	None	None	None	None	None	-0.16	1.205	0.541	-0.264	0.682	0.321	-0.038	-0.178	0.214	0.169	0.466	0.271	0.142	0.097	-0.146	-0.071	0.569	-0.026
162.m04578	CNAG_04983	None	None	None	None	None	None	None	KOG1018	F	Cytosine deaminase FCY1 and related enzymes	conserved hypothetical protein	None	None	None	None	None	None	None	None	Cne_OxR-dw_2.0	None	Cne_OxSR-dw_2.0	-0.209	1.123	0.268	-0.445	0.518	0.13	0.001	-0.035	0.25	0.221	0.024	0.15	0.13	0.241	-0.279	-0.16	0.258	-0.246
162.m04579	CNAG_04129	None	None	None	None	None	None	None	KOG4293	T	Predicted membrane protein, contains DoH and Cytochrome b-561/ferric reductase transmembrane domains	conserved hypothetical protein	None	None	None	None	None	None	None	None	None	None	None	0.03	1.023	0.547	-0.274	0.794	0.35	0.076	0.384	0.521	0.005	0.183	0.406	0.512	0.416	0.028	0.122	0.959	0.213
162.m04580	CNAG_04273	None	None	None	None	None	None	None	KOG4259	D	Putative nucleic acid-binding protein Hcc-1/proliferation associated cytokine-inducible protein, contains SAP domain	conserved hypothetical protein	None	None	None	None	None	None	None	None	None	None	None	-0.057	0.996	0.405	-0.269	0.565	0.078	-0.023	-0.2	0.183	0.126	0.36	0.159	0.117	0.036	-0.317	-0.078	0.303	-0.088
162.m04581	CNAG_04270	None	None	None	None	None	None	None	KOG3202	U	SNARE protein TLG1/Syntaxin 6	SNAP receptor	None	None	None	None	Cne_OsR-dw_2.0	None	None	None	None	None	Cne_OsSR-dw_2.0	0.025	0.434	-0.171	-0.383	0.683	0.284	0.076	0.342	0.367	0.117	-0.002	-0.232	0.19	0.3	-0.164	0.149	-0.264	0.188
162.m04582	CNAG_04262	None	None	None	None	None	None	None	None	None	None	E3 ubiquitin-protein ligase NRDP1	None	None	None	None	None	None	None	None	None	None	None	0.079	1.239	0.608	-0.257	1.14	0.177	0.174	0.397	0.719	0.067	0.162	0.424	0.452	0.427	0.236	0.202	1.018	0.326
162.m04584	CNAG_04256	None	None	SPAC25H1.04	mug105	None	None	None	KOG4696	S	Uncharacterized conserved protein	conserved hypothetical protein	None	DUF1671 family protein	None	None	None	None	None	Cne_OxR-up_2.0	None	Cne_OxSR-up_2.0	None	-0.18	0.974	0.056	-0.418	0.432	0.172	-0.088	-0.142	0.034	0.174	0.084	0.093	-0.019	0.203	-0.387	-0.247	-0.082	-0.276
162.m04586	CNAG_04254	None	None	None	None	None	None	None	KOG1984	U	Vesicle coat complex COPII, subunit SFB3	conserved hypothetical protein	None	None	None	None	None	None	None	None	None	None	None	0.109	1.022	0.433	-0.454	0.832	0.509	0.212	0.498	0.841	0.164	0.044	0.308	0.61	0.355	0.09	0.231	-0.071	0.233
162.m04587	CNAG_04241	YLR422W	None	None	None	orf19.815	ca4216	IPF5806	KOG1998	T	Signaling protein DOCK180	cytoplasmic protein	None	None	unknown function	None	None	None	None	None	None	None	None	-0.123	1.211	0.586	-0.261	0.786	0.249	-0.046	-0.322	0.361	0.144	0.451	0.163	0.233	-0.108	-0.185	-0.063	0.539	-0.067
162.m04589	CNAG_04234	None	None	None	None	None	None	None	KOG2216	S	Conserved coiled/coiled coil protein	conserved hypothetical protein	None	None	None	None	None	None	None	None	None	None	None	-0.232	1.124	0.452	-0.381	0.392	0.258	0.016	-0.033	0.357	0.181	0.034	0.3	0.245	0.306	-0.059	-0.139	0.303	-0.277
162.m04590	None	None	None	None	None	None	None	None	None	None	None	None	None	None	None	None	None	None	None	None	None	None	None	1.093	0.369	0.115	-0.066	0.112	0.396	0.465	0.954	-0.067	0.252	0.38	0.009	0.327	-0.005	-0.219	0.415	-0.481	0.308
162.m04591	CNAG_04308	None	None	None	None	None	None	None	KOG2304	I	3-hydroxyacyl-CoA dehydrogenase	short chain 3-hydroxyacyl-CoA dehydrogenase	None	None	None	None	None	None	None	None	Cne_OxR-dw_2.0	None	Cne_OxSR-dw_2.0	-0.091	1.249	0.512	-0.283	0.674	0.174	-0.023	-0.322	0.204	0.123	0.388	0.241	0.146	-0.025	-0.173	-0.041	0.614	-0.162
1621.seq.003																								0.07	1.181	0.603	-0.18	0.375	0.336	0.172	0.428	0.186	0.084	0.028	0.38	0.251	0.493	0.013	0.098	0.758	0.156
1621.seq.004																								0.211	1.37	0.489	-0.235	0.392	0.387	0.096	1.091	-0.21	0.25	0.789	0.684	0.612	0.379	0.143	0.302	0.305	0.122
1621.seq.015																								0.066	0.942	0.397	-0.252	0.692	0.238	0.198	0.47	0.488	0.104	0.027	0.236	0.171	0.493	0.074	0.019	0.627	0.202
1621.seq.022																								-0.002	1.429	0.498	-0.238	0.422	0.375	0.057	0.731	0.201	0.223	0.662	0.595	0.528	0.39	0.349	0.238	0.342	0.204
1621.seq.032																								0.247	0.656	0.158	-0.182	0.649	0.036	0.048	0.387	0.213	0.114	0.01	0.093	-0.026	0.413	-0.015	-0.056	0.398	0.18
1621.seq.035																								0.059	1.388	0.697	-0.229	0.341	0.406	-0.049	0.162	-0.176	0.254	0.804	0.654	0.32	0.214	0.055	0.091	0.328	-0.037
1621.seq.038																								-0.013	1.272	0.407	-0.257	0.879	0.515	0.233	0.499	0.744	0.138	0.007	0.237	0.362	0.372	-0.015	-0.017	0.673	-0.105
1621.seq.054																								0.111	0.934	0.447	-0.245	0.142	0.002	-0.083	0.086	-0.167	0.21	0.786	0.559	0.404	0.127	0.207	0.193	0.412	-0.074
1621.seq.059																								0.094	1.099	0.276	-0.208	0.826	0.458	0.204	0.273	0.555	0.166	-0.023	0.321	0.116	0.422	0.028	0.008	0.561	-0.142
1621.seq.062																								0.001	1.521	0.453	-0.26	0.078	0.394	0.14	0.176	-0.163	0.268	0.771	0.66	0.751	0.212	0.454	0.231	0.1	-0.012
1621.seq.066																								0.042	1.189	0.777	-0.279	0.855	0.537	0.322	0.291	0.825	0.181	0.033	0.467	0.53	0.41	0.113	0.115	1.004	0.055
1621.seq.071																								0.247	1.053	0.725	-0.334	0.409	0.634	0.399	0.561	0.304	0.18	0.828	0.753	0.764	-0.355	-0.113	0.45	-0.038	-0.136
1621.seq.085																								0.136	1.549	0.905	-0.225	0.896	0.537	0.077	0.521	0.37	0.231	0.006	0.569	0.46	-0.165	0.277	0.036	0.55	-0.145
1621.seq.094																								0.202	0.867	0.631	-0.197	0.377	0.273	0.245	0.511	0.281	0.156	0.419	0.484	0.638	-0.211	0.447	0.23	0.158	0.102
1621.seq.096																								0.183	1.213	0.437	-0.317	0.796	0.236	0.183	0.579	-0.016	0.28	0.088	0.537	0.445	-0.191	0.409	0.086	0.324	-0.01
1621.seq.103																								0.046	1.188	0.8	-0.261	-0.096	0.248	0.279	0.5	0.294	0.234	0.83	0.394	0.544	-0.327	0.365	0.422	-0.004	0.085
1621.seq.104																								0.127	1.075	0.601	-0.276	0.575	0.326	0.153	0.444	0.174	0.198	0.084	0.61	0.322	-0.141	0.126	0.001	0.379	0.065
1621.seq.122																								0.514	0.437	0.079	-0.223	0.388	0.127	0.315	0.371	0.045	-0.07	-0.007	0.147	0.021	0.318	-0.171	0.294	0.019	0.511
1621.seq.126																								0.283	0.583	0.582	-0.216	0.257	0.179	0.352	0.678	-0.642	0.132	0.722	0.14	0.888	-0.253	-0.042	0.302	-0.315	0.091
1621.seq.131																								0.093	0.288	0.325	-0.347	0.51	0.26	0.227	0.436	0.012	0.274	0.066	0.048	0.467	-0.163	-0.025	0.12	0.151	-0.066
1621.seq.132																								0.513	0.488	0.589	-0.105	0.615	-0.113	0.17	0.436	0.515	0.132	0.631	0.421	0.629	-0.516	0.191	0.202	0.255	0.182
1621.seq.133																								0.105	2.022	0.72	-0.246	0.804	0.258	0.159	0.542	0.103	0.275	0.074	0.599	0.4	-0.214	0.158	0.033	0.19	-0.179
1621.seq.134																								0.43	0.856	0.666	-0.198	-0.232	0.507	0.264	0.324	0.435	0.183	0.922	0.399	0.863	-0.279	0.76	0.573	-0.149	-0.679
1621.seq.135																								0.068	1.35	0.241	-0.226	0.988	0.133	0.168	0.42	0.925	0.22	-0.002	0.502	0.502	-0.215	0.513	0.055	0.197	-0.078
1621.seq.137																								0.092	1.486	0.916	-0.229	0.676	0.532	0.02	0.135	0.263	0.207	0.857	0.604	0.756	0.296	0.569	0.318	0.618	0.095
1621.seq.138																								-0.079	1.24	0.523	-0.32	0.894	0.572	0.155	0.357	-0.208	0.209	0.014	0.37	0.622	0.418	0.116	0.072	0.995	0.088
1621.seq.139																								0.043	1.479	0.446	-0.274	0.413	0.421	0.069	0.055	0.492	0.188	0.904	0.609	0.712	0.234	2.373	0.279	0.653	0.298
1621.seq.140																								0.118	1.377	0.556	-0.112	0.822	0.227	0.208	0.313	0.021	0.2	0.032	0.379	0.226	0.481	-0.213	0.029	0.614	0.196
1621.seq.141																								0.075	1.177	0.842	-0.204	0.772	0.396	0.137	0.14	-0.246	0.125	0.892	0.651	0.54	0.148	0.119	0.221	0.67	-0.022
1621.seq.142																								0.174	0.707	0.107	-0.279	0.573	0.416	-0.057	0.321	0.348	0.188	0.035	0.321	0.105	0.302	-0.008	-0.126	0.205	0.224
1621.seq.143																								0.325	1.108	0.521	-0.217	0.843	0.305	0.076	0.066	0.012	0.257	0.796	0.393	0.485	0.08	0.273	0.3	0.237	0.185
1621.seq.144																								0.956	0.232	0.102	-0.288	0.534	0.069	-0.221	0.221	0.007	0.126	0.054	0.126	-0.096	0.234	-0.2	-0.104	-0.073	0.355
1621.seq.145																								0.126	1.443	0.728	-0.184	1.009	0.482	0.069	0.046	-0.428	0.243	0.811	0.603	0.578	0.034	0.585	0.316	0.745	0.057
1621.seq.146																								-0.127	1.199	-0.095	-0.222	0.538	0.264	-0.187	0.257	0.565	0.227	0.109	0.25	0.109	0.099	-0.127	-0.262	0.254	-0.175
1621.seq.147																								0.318	0.64	0.324	-0.161	0.361	0.064	-0.002	-0.005	-0.162	0.094	0.622	0.326	0.209	0.023	0.014	0.145	0.024	0.234
1621.seq.148																								-0.039	1.361	0.932	-0.191	1.051	0.578	0.205	0.213	-0.855	0.234	0.034	0.619	0.502	0.441	0.17	-0.029	1.01	0.031
1621.seq.149																								0.243	1.394	0.673	-0.204	-0.302	0.736	0.323	0.389	0.029	0.197	0.779	0.383	0.742	-0.36	0.472	0.596	-0.259	-0.255
1621.seq.150																								0.108	0.969	0.621	-0.228	1.23	0.095	0.118	0.562	-0.043	0.25	0.02	0.631	0.505	-0.178	0.196	-0.014	0.317	-0.074
1621.seq.151																								0.252	1.069	0.736	-0.149	-0.208	0.184	0.311	0.515	0.181	0.189	0.785	0.325	0.506	-0.406	0.255	0.421	-0.075	0.101
1621.seq.152																								0.275	-0.749	-0.494	-0.028	0.333	-0.043	-0.371	0.15	-0.362	0.235	0.243	-0.402	-0.412	-0.572	0.008	-0.448	-0.474	-0.174
1621.seq.153																								0.296	0.942	0.614	-0.195	1.092	0.367	0.309	0.595	-0.228	0.208	0.735	0.578	0.722	-0.326	0.5	0.486	-0.138	-0.135
1621.seq.154																								0.167	0.461	0.305	-0.272	0.753	-0.146	0.122	0.455	0.321	0.292	0.069	0.126	0.058	-0.239	0.142	-0.001	0.076	-0.048
1621.seq.156																								0.436	0.55	0.609	-0.234	0.353	0.191	0.11	0.485	0.218	0.178	0.466	0.437	0.763	-0.207	0.288	0.396	-0.088	-0.088
1621.seq.158																								0.066	1.616	0.276	-0.201	0.678	0.141	0.24	0.63	-0.18	0.215	0.079	0.902	0.495	-0.167	0.377	0.155	0.296	-0.062
1621.seq.161																								0.708	0.07	0.207	-0.302	0.834	-0.07	-0.143	0.27	-0.48	0.153	0.332	0.182	0.757	-0.174	-0.094	0.169	-0.541	0.425
1621.seq.184																								0.207	0.541	0.626	-0.234	0.331	0.209	-0.071	0.679	0.27	0.209	0.103	0.453	0.12	-0.382	0.113	-0.168	-0.004	-0.043
1621.seq.186																								0.31	0.869	0.679	-0.143	-0.453	0.18	0.343	0.551	-0.138	0.252	0.706	0.13	0.859	-0.423	-0.138	0.464	-0.178	-0.106
1621.seq.190																								0.156	1.08	-0.204	-0.175	0.526	0.223	0.331	0.608	0.282	0.218	0.027	0.363	0.523	-0.127	0.065	0.17	-0.243	-0.067
1622.seq.001																								0.223	0.953	0.618	-0.221	0.383	0.243	0.133	0.177	0.156	0.212	0.649	0.379	0.252	0.129	0.172	0.144	0.301	0.365
1622.seq.005																								0.414	0.704	0.271	-0.196	0.535	0.103	0.106	0.302	-0.006	0.16	0.042	0.089	-0.04	0.363	-0.107	-0.002	0.375	0.064
1622.seq.034																								0.2	1.197	0.639	-0.202	0.601	0.178	0.216	-0.041	-0.243	0.168	0.88	0.24	0.62	0.023	0.221	0.256	0.389	0.079
1622.seq.041																								-0.023	1.369	0.705	-0.371	0.93	0.412	0.206	0.282	0.119	0.219	0.016	0.502	0.595	0.422	0.152	0.08	0.938	0.001
1622.seq.056																								0.271	0.928	0.449	-0.225	0.254	0.291	0.138	0.089	0.015	0.135	0.758	0.364	0.445	0.106	0.422	0.319	0.254	0.121
1622.seq.059																								-0.066	1.5	0.663	-0.188	1.078	0.376	0.203	0.397	1.229	0.225	0.061	0.575	0.617	0.29	0.453	0.125	0.691	0.006
1622.seq.073																								0.221	0.919	0.412	-0.259	0.514	0.186	0.137	0.138	-0.131	0.188	0.719	0.489	0.165	-0.007	0.096	0.278	0.142	0.164
1622.seq.075																								0.043	0.96	0.43	-0.173	0.625	0.14	0.087	0.326	0.341	0.229	0.069	0.206	0.127	0.344	-0.009	-0.061	0.66	0.139
1622.seq.080																								0.124	1.264	0.837	-0.202	0.798	0.155	0.286	0.115	0.047	0.167	0.814	0.525	0.585	0.037	0.812	0.317	0.613	0.043
1622.seq.088																								0.294	0.769	0.343	-0.301	0.554	0.03	0.045	0.244	-0.007	0.163	0.11	0.252	0.051	0.253	-0.18	-0.037	0.336	0.155
1622.seq.094																								0.267	1.215	0.491	-0.218	0.499	0.324	0.349	0.05	0.115	0.17	0.767	0.573	0.39	0.065	0.34	0.298	0.456	0.317
1622.seq.099																								-0.05	1.128	0.539	-0.265	0.863	0.339	0.131	0.279	0.301	0.238	0.08	0.391	0.348	0.323	0.027	-0.004	0.68	0.184
1622.seq.103																								0.424	1.08	0.623	-0.169	-0.139	-0.27	0.377	0.462	-0.069	0.231	0.748	0.337	1.088	-0.323	0.525	0.616	-0.512	-0.035
1622.seq.104																								0.895	0.614	0.325	-0.13	0.911	0.547	0.065	0.609	0.423	0.194	0.091	0.417	0.24	0.078	0.203	0.133	0.042	0.408
1622.seq.108																								0.416	0.931	0.602	-0.18	-0.648	-0.383	0.394	0.593	0.268	0.222	0.79	0.413	0.979	-0.284	0.199	0.792	0.144	-0.28
1622.seq.110																								0.299	0.661	1.408	-0.305	0.339	0.606	0.023	0.534	0.052	0.25	0.057	0.618	-0.195	-0.274	0.109	-0.149	-0.026	0.07
1622.seq.130																								0.503	0.687	0.436	-0.183	-0.316	0.113	0.503	0.84	-0.331	0.25	0.627	0.561	0.627	-0.657	0.368	0.693	-0.637	-0.101
1622.seq.133																								0.237	0.169	-0.666	-0.246	-0.267	0.042	0.305	0.715	-0.06	0.263	0.095	0.014	0.409	-0.211	0.093	0.184	-0.36	0.132
1622.seq.137																								0.514	0.479	0.527	-0.22	-0.562	0.169	0.441	0.99	-0.475	0.234	0.762	0.038	0.508	-0.76	-0.05	0.382	-0.65	1.807
1622.seq.139																								0.312	0.18	0.102	-0.256	0.242	-0.036	0.308	0.718	-0.301	0.265	0.156	0.252	0.231	-0.138	-0.112	0.103	0.077	0.195
1622.seq.145																								0.271	0.515	0.502	-0.209	-0.021	0.094	0.538	0.643	0.194	0.248	0.792	0.516	-0.57	-0.41	0.165	0.583	-0.623	0.082
1622.seq.146																								0.15	0.692	-0.177	-0.252	-0.36	0.172	0.14	0.686	-0.095	0.266	0.124	0.117	0.252	-0.203	0.579	0.041	-0.223	0.144
1622.seq.165																								0.673	0.405	0.451	-0.266	-0.328	-0.293	0.593	0.578	-0.048	0.193	0.683	-0.189	0.409	-0.284	-0.229	0.631	-0.469	0.4
1622.seq.182																								0.233	0.183	0.259	-0.211	0.088	0.07	-0.158	0.656	-0.034	0.215	0.094	0.146	-0.147	-0.209	-0.03	-0.229	-0.149	0.286
1622.seq.186																								0.197	0.892	-0.252	-0.248	0.159	0.292	-0.519	0.253	-0.36	0.024	0.281	0.156	0.066	0.132	-0.276	-0.28	0.018	0.104
1622.seq.188																								0.066	0.253	0.027	-0.517	0.488	0.209	-0.568	-0.15	-0.363	0.166	0.158	0.265	-0.342	-0.159	-0.208	-0.313	-0.474	-0.064
1622.seq.195																								0.228	1.299	0.482	-0.264	0.459	0.479	0.219	0.337	0.585	0.1	0.221	0.513	0.733	0.517	0.128	0.19	0.81	0.152
1622.seq.197																								-0.043	1.456	0.626	-0.36	0.928	0.387	0.36	0.381	0.192	0.19	0.006	-0.015	0.779	0.546	0.297	0.119	0.249	0.105
1622.seq.201																								0.062	1.273	0.731	-0.236	0.985	0.393	0.259	0.586	0.931	0.122	0.11	0.578	0.807	0.688	0.408	0.268	1.081	0.393
1622.seq.203																								0.046	0.908	0.181	-0.426	0.59	0.056	0.242	0.374	2.884	0.193	0.046	0.446	0.429	0.524	0.059	0.127	-0.003	0.204
1623.seq.003																								0.431	0.673	0.377	-0.16	0.662	0.341	0.113	0.462	0.395	0.096	0.216	0.286	-0.036	0.446	-0.086	0.12	0.641	0.369
1623.seq.004																								0.333	0.275	0.541	-0.358	1.238	-0.143	0.079	0.244	0.013	0.137	0.14	0.401	0.162	0.206	-0.271	-0.036	0.363	0.217
1623.seq.011																								0.128	1.216	0.559	-0.212	0.414	0.27	0.24	0.14	0.363	0.111	0.253	0.375	0.23	0.56	-0.002	0.157	0.876	0.358
1623.seq.024																								0.171	0.491	-0.077	-0.397	0.622	0.054	0.11	0.418	0.765	0.251	0.013	-0.029	0.182	0.361	-0.251	-0.021	-0.169	-0.027
1623.seq.053																								0.095	1.229	0.56	-0.236	0.819	0.254	0.117	0.163	0.473	0.103	0.202	0.488	0.405	0.511	-0.066	0.231	0.67	0.386
1623.seq.060																								-0.018	0.543	0.128	-0.389	0.851	0.178	0.045	0.361	0.498	0.252	0.011	-0.012	0.176	0.136	-0.316	-0.122	0.041	0.137
163.m02349	None	None	None	None	None	None	None	None	None	None	None	None	None	None	None	None	None	None	None	None	None	None	None	0.127	0.924	0.466	-0.263	0.811	0.017	-0.032	0.316	0.516	0.095	0.191	0.351	0.293	0.364	-0.22	-0.02	0.615	0.187
163.m02353	CNAG_07397	None	None	SPAC6G10.05c	None	orf19.7604	None	None	KOG1953	U	Targeting complex (TRAPP) subunit	conserved hypothetical protein	None	TRAPP complex subunit Trs120 (predicted)	None	None	None	None	None	None	None	None	None	-0.134	0.974	0.212	-0.333	0.444	0.072	-0.072	-0.107	0.077	0.212	0.044	0.061	0.03	0.296	-0.089	-0.165	0.2	-0.205
163.m02360	None	None	None	None	None	None	None	None	None	None	None	None	None	None	None	None	None	None	None	None	None	None	None	0.183	0.101	0.444	-0.35	-0.327	-0.343	0.245	1.362	0.459	0.235	0.573	0.545	0.134	-0.193	0.07	0.079	0	0.315
163.m02366	CNAG_06846	None	None	None	None	None	None	None	KOG4602	R	Nanos and related proteins	conserved hypothetical protein	None	None	None	None	None	None	None	None	None	None	None	0.209	0.591	0.28	-0.457	0.739	0.133	0.093	0.443	0.577	0.137	-0.045	-0.161	0.416	0.161	-0.001	0.108	-0.133	0.212
163.m02367	CNAG_06845	YAR019C	CDC15	SPBC21.06c	cdc7	orf19.3545	None	None	KOG0198	T	MEKK and related serine/threonine protein kinases	STE-group protein kinase	Protein kinase of the Mitotic Exit Network that is localized to the spindle pole bodies at late anaphase; promotes mitotic exit by directly switching on the kinase activity of Dbf2p	serine/threonine protein kinase Cdc7	None	None	None	None	None	None	None	None	None	-0.137	1.273	0.502	-0.294	0.698	0.222	0.024	-0.223	0.294	0.149	0.416	0.287	0.177	-0.047	-0.124	-0.033	0.522	-0.125
163.m02387	CNAG_06826	None	None	None	None	None	None	None	None	None	None	conserved hypothetical protein	None	None	None	None	None	None	None	None	None	None	None	0.06	0.912	0.276	-0.243	0.735	0.211	-0.075	-0.028	0.286	0.142	0.233	0.254	0.206	0.26	-0.069	-0.08	0.185	0.245
163.m02390	CNAG_06823	None	None	None	None	None	None	None	KOG1064	R	RAVE (regulator of V-ATPase assembly) complex subunit RAV1/DMX protein, WD repeat superfamily	conserved hypothetical protein	None	None	None	None	None	None	None	None	None	None	None	0.187	0.848	0.433	-0.449	1	0.386	0.191	0.425	0.812	0.235	0.071	0.111	0.471	0.261	0.304	0.21	0.234	0.328
163.m02400	CNAG_06816	None	None	None	None	None	None	None	KOG1018	F	Cytosine deaminase FCY1 and related enzymes	FCY1	None	None	None	None	None	None	None	None	None	None	None	0.041	1.232	0.611	-0.253	0.861	0.226	0.115	0.114	0.13	0.111	0.143	0.369	0.464	0.37	-0.02	0.082	0.808	0.18
163.m02404	None	None	None	None	None	None	None	None	None	None	None	None	None	None	None	None	None	None	None	None	None	None	None	0.254	0.14	0.597	-0.203	0.412	-0.326	0.583	1.073	0.116	0.318	0.41	-0.342	0.582	-0.191	-0.082	0.563	-0.532	0.386
163.m02408	None	None	None	None	None	None	None	None	None	None	None	None	None	None	None	None	None	None	None	None	None	None	None	-0.158	0.436	0.425	-0.466	0.82	0.349	0.207	0.449	1.057	0.222	0.011	-0.241	0.439	0.245	-0.003	0.131	0.165	0.221
163.m02431	CNAG_01452	None	None	None	None	None	None	None	KOG4197	R	FOG: PPR repeat	163.m02431p	None	None	None	None	None	None	None	None	None	None	None	0.58	-0.37	-0.157	-0.238	0.553	-0.295	-0.528	-0.213	-0.06	-0.092	0.286	-0.304	-0.355	-0.225	-0.705	-0.204	-0.299	0.231
163.m02477	CNAG_07417	None	None	None	None	None	None	None	None	None	None	conserved hypothetical protein	None	None	None	None	None	None	None	None	None	None	None	0.309	0.359	-0.138	-0.251	-1.606	0.094	0.648	1.596	-0.946	0.33	0.879	-0.261	0.606	-0.164	0.426	0.418	-0.865	0.249
163.m02479	CNAG_01408	None	None	SPAC11E3.11c	None	orf19.6705	ca4305	IPF6654	KOG0929	U	Guanine nucleotide exchange factor	guanine nucleotide exchange factor	None	guanyl-nucleotide exchange factor (predicted)	unknown function	None	None	None	None	None	None	None	None	-0.204	1.007	0.349	-0.356	0.438	-0.029	-0.088	-0.135	0.178	0.204	0.013	0.15	0.045	0.178	-0.246	-0.172	0.158	-0.227
163.m02480	None	None	None	None	None	None	None	None	None	None	None	None	None	None	None	None	None	None	None	None	None	None	None	-0.054	0.625	0.154	-0.431	0.702	-0.832	0.164	0.467	1.008	0.179	0.001	-0.011	0.415	0.404	0.056	0.147	-0.186	0.22
163.m02499	CNAG_01386	None	None	None	None	None	None	None	None	None	None	conserved hypothetical protein	None	None	None	None	None	None	None	Cne_OxR-up_2.0	None	Cne_OxSR-up_2.0	None	0.218	0.88	0.248	-0.259	0.597	0.089	0.133	0.277	0.369	0.227	0.154	0.197	0.137	-0.387	0.245	0.024	0.39	-0.126
163.m02518	None	None	None	None	None	None	None	None	None	None	None	None	None	None	None	None	None	None	None	None	None	None	None	0.283	0.889	0.424	-0.061	-0.295	0.771	0.85	1.292	1.813	0.342	0.46	-0.277	0.654	-0.504	-0.14	0.839	-0.282	0.029
163.m02528	CNAG_01358	None	None	None	None	None	None	None	KOG1029	TU	Endocytic adaptor protein intersectin	conserved hypothetical protein	None	None	None	None	None	None	None	None	None	None	None	-0.172	1.049	0.806	-0.37	0.661	0.082	0.217	0.288	-0.188	0.144	0.897	0.409	0.397	-0.258	0.281	0.126	-0.525	-0.275
163.m02529	CNAG_01357	None	None	SPBC1685.01	pmp1	None	None	None	KOG1716	V	Dual specificity phosphatase	conserved hypothetical protein	None	dual-specificity MAP kinase phosphatase Pmp1	None	None	None	None	None	Cne_OxR-up_2.0	None	Cne_OxSR-up_2.0	None	0.085	0.671	0.274	-0.191	0.412	-0.039	-0.094	0.047	0.047	0.162	0.439	0.126	0.093	-0.671	-0.226	-0.089	-0.302	0.071
163.m02530	None	None	None	None	None	None	None	None	None	None	None	None	None	None	None	None	None	None	None	None	None	None	None	0.803	0.527	0.424	-0.235	0.832	0.129	-0.077	0.343	0.476	0.132	0.187	0.401	0.116	-0.178	-0.035	0.022	0.192	0.355
163.m02539	CNAG_01349	None	None	None	None	None	None	None	None	None	None	conserved hypothetical protein	None	None	None	None	None	None	None	None	None	None	None	-0.29	1.199	0.573	-0.373	0.566	0.078	0.264	0.456	0.616	0.13	0.933	0.412	0.346	-0.411	0.071	0.116	-0.258	-0.251
163.m02566	CNAG_01317	None	None	SPAC3F10.12c	None	orf19.2876	ca2473	CBF1	KOG1318	K	Helix loop helix transcription factor EB	conserved hypothetical protein	None	DNA binding protein (predicted)	putative centromere binding factor 1	None	None	None	None	None	None	None	None	0.351	0.914	0.54	-0.206	0.725	0.052	0.175	0.307	0.09	0.197	0.174	0.607	0.19	-0.403	0.32	0.089	0.408	0.018
163.m02582	CNAG_01303	None	None	None	None	None	None	None	KOG4197	R	FOG: PPR repeat	conserved hypothetical protein	None	None	None	None	None	None	None	None	None	None	None	-0.004	0.866	0.464	-0.25	0.632	0.021	0.178	0.068	-0.089	0.097	0.25	0.389	0.188	-0.396	-0.147	-0.017	-0.5	-0.266
163.m02584	CNAG_01300	YKR057W	RPS21A	SPBC18E5.06	rps21	orf19.3325.3	ca2937	RPS21B.3f	KOG3486	J	40S ribosomal protein S21	ribosomal protein s21	Protein component of the small (40S) ribosomal subunit; nearly identical to Rps21Bp and has similarity to rat S21 ribosomal protein	40S ribosomal protein S21	ribosomal protein S21, 3- prime end	None	None	None	None	None	Cne_OxR-dw_2.0	None	Cne_OxSR-dw_2.0	0.64	0.743	0.376	-0.06	0.261	-0.19	-0.098	-0.014	-0.105	0.151	0.11	0.32	0.044	-0.426	0.014	-0.072	-0.344	0.02
163.m02595	CNAG_01293	None	None	None	None	None	None	None	None	None	None	conserved hypothetical protein	None	None	None	None	None	None	None	None	None	None	None	0.003	1.02	0.451	-0.308	0.435	-0.013	-0.082	-0.023	0.037	0.103	0.274	0.331	0.078	-0.575	-0.344	-0.098	-0.395	-0.295
163.m02597	CNAG_01291	None	None	None	None	None	None	None	None	None	None	conserved hypothetical protein	None	None	None	None	None	None	None	None	None	None	None	1.127	0.127	-0.344	-0.377	0.414	-0.023	0.138	0.715	-0.105	0.296	0.533	-0.351	-0.004	0.164	0.016	0.032	-0.57	0.297
163.m02599	CNAG_01289	None	None	None	None	None	None	None	None	None	None	conserved hypothetical protein	None	None	None	None	None	None	None	Cne_OxR-up_2.0	None	Cne_OxSR-up_2.0	None	0.942	0.033	-0.193	-0.192	-0.061	-0.263	0.216	0.847	0.106	0.208	0.442	0	-0.053	-0.603	-0.429	0.205	-0.52	0.505
163.m02620	CNAG_01267	YIR042C	None	None	None	None	None	None	None	None	None	conserved hypothetical protein	None	None	None	None	None	None	None	Cne_OxR-up_2.0	None	Cne_OxSR-up_2.0	None	0.037	1.116	0.611	-0.147	0.62	0.061	0.076	0.084	0.252	0.203	0.514	0.366	0.265	-0.78	0.18	0.047	-0.054	-0.038
163.m02628	CNAG_06947	None	None	None	None	None	None	None	KOG2401	L	Predicted MutS-related protein involved in mismatch repair	conserved hypothetical protein	None	None	None	None	None	None	None	None	None	None	None	0.075	0.929	0.425	-0.378	0.568	0.052	0.201	0.518	0.083	0.144	0.986	0.288	0.331	-0.388	0.425	0.135	-0.222	-0.282
163.m02691	CNAG_01194	None	None	None	None	None	None	None	None	None	None	conserved hypothetical protein	None	None	None	None	None	None	None	None	None	None	None	0.3	0.746	0.6	-0.219	0.799	-0.003	0.159	0.27	0.401	0.174	0.174	0.486	0.382	-0.348	0.169	-0.013	0.365	0.015
163.m02700	CNAG_01188	None	None	SPAC17C9.14	None	orf19.6434	ca5105	PEX19	KOG3133	U	40 kDa farnesylated protein associated with peroxisomes	peroxin19 Pex19p	None	Pex19 protein family	Required for biogenesis of peroxisomes (by homology)	None	None	None	None	None	None	None	None	0.247	1.178	0.511	-0.365	0.517	0.312	0.15	0.426	0.203	0.132	0.872	0.717	0.364	-0.297	0.086	0.098	-0.283	-0.222
163.m02724	CNAG_01166	None	None	SPAC3A12.09c	None	None	None	None	None	None	None	conserved hypothetical protein	None	urease accessory protein UreD (predicted)	None	None	None	None	None	None	Cne_OxR-dw_2.0	None	Cne_OxSR-dw_2.0	0.07	0.826	0.138	-0.284	0.445	0.014	-0.244	0.009	-0.236	0.105	0.293	0.086	-0.046	-0.65	-0.062	-0.258	-0.538	-0.395
163.m02726	CNAG_01164	YKL104C	GFA1	SPBC12C2.11	None	orf19.1618	ca4016	GFA1	KOG1268	M	Glucosamine 6-phosphate synthetases, contain amidotransferase and phosphosugar isomerase domains	glutamine-fructose-6-phosphate transaminase	Glutamine-fructose-6-phosphate amidotransferase, catalyzes the formation of glucosamine-6-P and glutamate from fructose-6-P and glutamine in the first step of chitin biosynthesis	glutamine-fructose-6-phosphate transaminase (predicted)	glutamine:fructose-6-phosphateamidotransferase	None	None	None	None	None	None	None	None	0.801	-0.082	0.163	-0.011	0.48	-0.254	-0.122	0.313	0.126	0.145	0.174	-0.029	-0.123	-0.226	-0.401	-0.082	0.023	0.203
163.m02728	CNAG_01158	YLR116W	MSL5	SPCC962.06c	bpb1	orf19.329	ca3380	MSL5	KOG0119	A	Splicing factor 1/branch point binding protein (RRM superfamily)	splicing factor SF1	Component of the commitment complex, which defines the first step in the splicing pathway; essential protein that interacts with Mud2p and Prp40p, forming a bridge between the intron ends; also involved in nuclear retention of pre-mRNA	zinc finger protein Bpb1	branch point bridging protein (by homology)	None	None	None	None	None	None	None	None	0.579	0.379	0.232	-0.376	0.277	-0.246	0.076	0.378	-0.351	0.136	0.717	-0.149	0.144	-0.28	-0.144	0.019	-0.554	-0.175
163.m02731	CNAG_07439	YLR409C	UTP21	SPCC1672.07	None	orf19.1566	ca3990	IPF14782	KOG1539	R	WD repeat protein	WD-repeat protein	Possible U3 snoRNP protein involved in maturation of pre-18S rRNA, based on computational analysis of large-scale protein-protein interaction data	U3 snoRNP-associated protein Utp21 (predicted)	beta-transducin (by homology)	None	None	None	None	None	None	None	None	0.381	0.627	0.388	-0.224	0.64	-0.108	0.135	0.288	0.133	0.179	0.216	0.379	0.198	-0.342	0.078	0.045	0.385	-0.029
163.m02734	CNAG_01162	None	None	None	None	None	None	None	None	None	None	conserved hypothetical protein	None	None	None	None	None	None	None	None	Cne_OxR-dw_2.0	None	Cne_OxSR-dw_2.0	0.152	0.902	0.476	-0.425	0.023	0.049	0.121	0.48	0.028	0.167	0.986	0.256	0.424	-0.334	0.13	0.211	-0.522	-0.214
163.m02735	CNAG_01157	None	None	None	None	None	None	None	KOG2277	D	S-M checkpoint control protein CID1 and related nucleotidyltransferases	conserved hypothetical protein	None	None	None	None	None	None	None	None	None	None	None	-3.392	-1.415	0.263	2.585	<no data>	<no data>	<no data>	<no data>	-0.09	-0.263	1.71	0.536	<no data>	<no data>	16.61	-0.628	-1.541	2.737
163.m02736	CNAG_01156	None	None	None	None	None	None	None	KOG2458	R	Endoplasmic reticulum protein EP58, contains filamin rod domain and KDEL motif	CAP2p	None	None	None	None	None	None	None	None	None	None	None	0.265	0.926	0.503	-0.208	0.69	0.146	0.108	0.038	-0.11	0.155	0.056	0.359	0.238	0.305	-0.111	0.125	0.286	0.199
163.m02738	CNAG_01153	YDR064W	RPS13	SPAC6F6.07c	rps13	orf19.4193.1	ca1304	RPS13.3	KOG0400	J	40S ribosomal protein S13	40s ribosomal protein s13	Protein component of the small (40S) ribosomal subunit; has similarity to E. coli S15 and rat S13 ribosomal proteins	40S ribosomal protein S13 (predicted)	ribosomal protein (by homology)	None	None	None	None	None	Cne_OxR-dw_2.0	None	Cne_OxSR-dw_2.0	0.522	0.661	0.323	0.058	0.128	-0.515	-0.212	-0.096	-0.288	0.11	0.078	0.077	-0.268	-0.492	-0.37	-0.164	-0.419	0.025
163.m02740	CNAG_01151	None	None	None	None	None	None	None	KOG0417	O	Ubiquitin-protein ligase	conserved hypothetical protein	None	None	None	None	None	None	None	None	None	None	None	0.251	0.114	-0.294	-0.534	0.657	0.193	0.156	0.316	-0.232	0.151	0.005	-0.327	0.003	0.18	-0.122	-0.002	-0.666	0.062
163.m02744	CNAG_01148	YML074C	FPR3	SPBC1347.02	fkbp39	orf19.1030	ca1629	NPI46	KOG0552	O	FKBP-type peptidyl-prolyl cis-trans isomerase	peptidyl prolyl cis-trans isomerase	Nucleolar peptidyl-prolyl cis-trans isomerase (PPIase); FK506 binding protein; phosphorylated by casein kinase II (Cka1p-Cka2p-Ckb1p-Ckb2p) and dephosphorylated by Ptp1p	FKBP-type peptidyl-prolyl cis-trans isomerase (predicted)	proline cis-trans isomerase (by homology)	None	None	None	None	None	Cne_OxR-dw_2.0	None	Cne_OxSR-dw_2.0	0.25	0.517	0.283	-0.185	0.324	-0.072	-0.078	0.08	-0.064	0.107	0.251	0.405	0.007	-0.42	-0.354	-0.043	-0.511	-0.261
163.m02746	CNAG_01146	YGR090W	UTP22	SPBC776.08c	None	orf19.1569	ca3993	IPF8275	KOG2054	S	Nucleolar RNA-associated protein (NRAP)	pre-rRNA processing protein Utp22	Possible U3 snoRNP protein involved in maturation of pre-18S rRNA, based on computational analysis of large-scale protein-protein interaction data	Nrap	unknown function	None	None	None	None	None	Cne_OxR-dw_2.0	None	Cne_OxSR-dw_2.0	0.166	1.301	0.49	-0.235	0.654	0.315	0.046	0.04	0.131	0.123	0.147	0.451	0.356	0.369	0.038	0.074	0.568	0.247
163.m02748	CNAG_01144	YAR007C	RFA1	SPBC660.13c	ssb1	orf19.2093	ca4808	RFA1	KOG0851	L	Single-stranded DNA-binding replication protein A (RPA), large (70 kD) subunit and related ssDNA-binding proteins	damaged DNA binding protein	Subunit of heterotrimeric Replication Protein A (RPA), which is a highly conserved single-stranded DNA binding protein involved in DNA replication, repair, and recombination	DNA replication factor A subunit Ssb1	DNA replication factor A, 69 KD subunit (by homology)	None	None	None	None	None	None	None	None	0.366	0.314	0.485	-0.195	0.605	0.073	0.408	0.865	0.023	-0.048	0.351	0.097	0.151	0.546	0.049	0.374	-0.299	0.089
163.m02751	CNAG_01142	YPR091C	None	SPBC23G7.06c	None	orf19.1285	ca2363	IPF10590	KOG2238	R	Uncharacterized conserved protein TEX2, contains PH domain	endoplasmic reticulum protein	None	conserved eukaryotic protein	unknown function	None	None	None	None	None	None	None	None	-0.002	0.8	0.25	-0.454	0.694	-0.061	0.279	0.419	0.454	0.198	-0.009	-0.085	0.372	0.103	-0.077	0.132	-0.134	0.15
163.m02754	CNAG_01141	YOL142W	RRP40	SPAC22A12.12c	None	orf19.3304	ca4613	IPF7950	KOG1004	J	Exosomal 3'-5' exoribonuclease complex subunit Rrp40	3'-5'-exoribonuclease	Protein involved in rRNA processing; component of the exosome 3->5 exonuclease complex	exosome subunit Rrp40 (predicted)	similar to Saccharomyces cerevisiae Rrp40p involved in ribosomal RNA processing, component of the exosome complex responsible for 3' end processing and degradation of many RNA species (by homology)	None	None	None	None	None	Cne_OxR-dw_2.0	None	Cne_OxSR-dw_2.0	0.052	0.941	0.553	-0.158	0.81	0.092	0.053	0.032	0.312	0.181	0.457	0.293	0.327	-0.821	-0.079	0.061	-0.125	-0.065
163.m02758	CNAG_01136	None	None	SPBC16A3.04	rsm25	None	None	None	None	None	None	conserved hypothetical protein	None	mitochondrial ribosomal protein subunit Rsm25	None	None	None	None	None	None	None	None	None	0.334	0.285	0.092	-0.299	0.389	-0.027	-0.389	-0.046	-0.246	0.088	0.31	0.06	-0.292	-0.552	-0.272	-0.216	-0.344	-0.073
163.m02799	CNAG_01096	None	None	None	None	None	None	None	KOG3694	D	Protein required for meiosis	conserved hypothetical protein	None	None	None	None	None	None	None	None	None	None	None	0.272	1.093	0.566	-0.188	0.528	0.202	0.037	0.016	0.395	0.142	0.217	0.217	0.246	0.347	0.008	0.096	0.446	0.271
163.m02802	CNAG_01092	None	None	None	None	None	None	None	KOG2301	PT	Voltage-gated Ca2+ channels, alpha1 subunits	conserved hypothetical protein	None	None	None	None	None	None	None	None	Cne_OxR-dw_2.0	None	Cne_OxSR-dw_2.0	0.402	0.252	0.318	-0.372	0.613	-0.17	0.064	0.383	0.283	0.178	0.031	0.205	-0.062	0.172	-0.256	0.013	-0.255	0.14
163.m02804	CNAG_01089	None	None	None	None	orf19.5433	ca5786	IPF1134	None	None	None	conserved hypothetical protein	None	None	unknown function Unknown function	None	None	None	None	None	None	None	None	0.089	1.149	0.534	-0.234	0.538	0.316	0.116	0.138	0.416	0.185	0.139	0.028	0.17	0.285	-0.18	0.084	0.52	0.165
163.m02820	CNAG_07441	None	None	None	None	None	None	None	KOG1052	PET	Glutamate-gated kainate-type ion channel receptor subunit GluR5 and related subunits	conserved hypothetical protein	None	None	None	None	None	None	None	Cne_OxR-up_2.0	None	Cne_OxSR-up_2.0	None	0.107	0.304	-0.189	-0.484	0.345	-0.174	-0.389	0.239	-0.424	0.119	0.076	-0.099	-0.378	-0.265	-0.515	-0.524	-0.48	-0.066
163.m02841	None	None	None	None	None	None	None	None	None	None	None	None	None	None	None	None	None	None	None	None	None	None	None	-0.036	1.409	0.364	0.525	-0.383	-0.251	0.693	1.083	-0.566	0.085	-0.066	0.474	0.57	0.986	0.39	0.457	0.346	0.242
163.m02846	CNAG_01048	None	None	None	None	None	None	None	KOG2236	S	Uncharacterized conserved protein	conserved hypothetical protein	None	None	None	None	None	None	None	None	None	None	None	0.073	0.891	0.618	-0.117	0.577	0.126	0.059	0.083	0.221	0.152	0.547	0.233	0.328	-0.76	-0.288	-0.046	-0.275	-0.044
163.m02854	None	None	None	None	None	None	None	None	None	None	None	None	None	None	None	None	None	None	None	None	None	None	None	-0.061	1.992	0.399	0.162	-0.916	0.522	0.987	1.007	0.637	-0.069	1.478	-0.424	1.083	1.005	0.566	0.697	0.446	-0.086
163.m02867	CNAG_01029	YDL177C	None	SPAC27E2.02	None	orf19.3273	ca5464	IPF285.5f	KOG3299	S	Uncharacterized conserved protein	impact family protein	None	IMPACT homolog	unknown function, 5-prime end	None	None	None	None	None	None	None	None	-0.052	0.88	0.384	-0.238	0.338	-0.024	-0.063	0.042	0.085	0.086	0.303	0.511	0.087	-0.557	-0.052	0.003	-0.279	-0.348
163.m02872	CNAG_01024	None	None	SPAC2F3.02	None	None	None	None	None	None	None	conserved hypothetical protein	None	ER protein translocation subcomplex subunit Sec72 (predicted)	None	None	None	None	None	None	None	None	None	0.213	0.632	0.298	-0.304	0.385	0.05	-0.183	-0.275	0.044	0.045	0.287	0.032	-0.107	-0.169	-0.387	-0.124	0.019	0.032
163.m02885	CNAG_01012	None	None	None	None	None	None	None	None	None	None	conserved hypothetical protein	None	None	None	None	None	None	None	None	Cne_OxR-dw_2.0	None	Cne_OxSR-dw_2.0	0.036	1.206	0.562	-0.257	0.87	0.286	0.047	0.091	0.39	0.141	0.181	0.235	0.225	0.253	0.129	0.079	0.565	0.064
163.m02895	CNAG_01001	None	None	None	None	None	None	None	KOG0459	J	Polypeptide release factor 3	conserved hypothetical protein	None	None	None	None	None	None	None	None	None	None	None	-0.238	1.28	0.496	-0.37	0.629	0.129	0.042	-0.105	0.366	0.203	0.064	0.387	0.144	0.245	-0.149	-0.186	0.334	-0.27
163.m02923	CNAG_00975	None	None	None	None	None	None	None	KOG1432	R	Predicted DNA repair exonuclease SIA1	conserved hypothetical protein	None	None	None	None	None	None	None	None	None	None	None	-0.036	0.434	0.171	-0.428	0.645	-0.326	0.404	0.635	0.343	0.176	-0.022	-0.135	0.206	0.212	-0.058	0.118	-0.382	0.123
163.m02928	CNAG_00972	None	None	None	None	None	None	None	KOG3375	R	Phosphoprotein/predicted coiled-coil protein	conserved hypothetical protein	None	None	None	None	None	None	None	None	None	None	None	0.093	0.84	0.215	-0.316	0.46	0.104	-0.151	-0.31	0.128	0.099	0.356	0.166	0.038	-0.245	-0.198	-0.087	0.029	-0.048
163.m02932	CNAG_00967	None	None	None	None	None	None	None	KOG4197	R	FOG: PPR repeat	conserved hypothetical protein	None	None	None	None	None	None	None	None	None	None	None	-0.305	0.813	0.325	-0.389	0.473	0.192	-0.028	-0.032	-0.034	0.22	0.047	0.175	0.113	0.226	-0.103	-0.198	0.194	-0.233
163.m02936	CNAG_00964	None	None	None	None	None	None	None	KOG4293	T	Predicted membrane protein, contains DoH and Cytochrome b-561/ferric reductase transmembrane domains	conserved hypothetical protein	None	None	None	None	None	Cne_FxR-up_2.0	None	Cne_OxR-up_2.0	None	None	None	0.132	1.197	0.586	-0.295	0.942	0.22	0.11	-0.132	0.512	0.18	0.128	0.353	0.388	0.433	0.002	0.169	0.518	0.187
163.m02937	CNAG_07446	YER048W-A	ISD11	None	None	None	None	None	KOG3801	A	Uncharacterized conserved protein BCN92	mitochondrial protein	Protein required for mitochondrial iron-sulfur cluster biosynthesis	None	None	None	None	None	None	None	None	None	None	0.326	0.065	-0.229	-0.027	0.294	0.238	0.292	0.672	-0.264	0.011	0.013	0.071	0.057	0.386	-0.104	0.271	-0.118	0.53
163.m02942	None	None	None	None	None	None	None	None	None	None	None	None	None	None	None	None	None	None	None	None	None	None	None	-0.143	1.625	0.756	-0.159	-0.69	0.56	1.057	0.894	-0.087	0.378	1.039	0.091	1.215	1.08	0.568	0.913	0.612	-0.559
163.m02944	None	None	None	None	None	None	None	None	None	None	None	None	None	None	None	None	None	None	None	None	None	None	None	-0.082	1.021	-0.106	0.325	0.333	0.233	0.641	1.059	<no data>	0.033	-0.035	1.201	0.397	0.79	0.42	0.385	0.735	0.5
163.m02945	None	None	None	None	None	None	None	None	None	None	None	None	None	None	None	None	None	None	None	None	None	None	None	-0.168	1.064	0.676	-0.405	0.831	0	0.394	0.605	0.343	0.157	-0.069	0.7	0.731	0.378	0.187	0.096	0.101	0.051
163.m02960	None	None	None	None	None	None	None	None	None	None	None	None	None	None	None	None	None	None	None	None	None	None	None	-0.121	1.608	0.737	0.063	0.019	0.831	1.116	1.086	0.401	0.112	1.401	-0.102	1.161	1.023	0.233	0.753	0.382	-0.031
163.m02961	None	None	None	None	None	None	None	None	None	None	None	None	None	None	None	None	None	None	None	None	None	None	None	-0.108	1.081	0.425	0.262	1.01	-0.18	0.789	0.925	-0.186	0.074	0.078	0.975	0.676	0.824	0.108	0.442	1.051	0.323
163.m02976	CNAG_00925	None	None	None	None	None	None	None	None	None	None	conserved hypothetical protein	None	None	None	None	None	None	None	None	None	None	None	0.761	0.307	0.313	-0.219	0.807	-0.015	-0.184	0.254	0.147	0.113	0.176	0.203	-0.143	-0.319	-0.103	-0.16	-0.104	0.145
163.m03000	CNAG_00899	None	None	None	None	None	None	None	KOG1245	B	Chromatin remodeling complex WSTF-ISWI, large subunit (contains heterochromatin localization, PHD and BROMO domains)	conserved hypothetical protein	None	None	None	Cne_OsR-up_2.0	None	Cne_FxR-up_2.0	None	None	None	None	None	-0.124	1.305	0.549	-0.293	0.771	0.177	-0.05	-0.207	0.411	0.173	0.419	0.294	0.109	-0.179	-0.174	-0.042	0.429	-0.155
163.m03006	None	None	None	None	None	None	None	None	None	None	None	None	None	None	None	None	None	None	None	None	None	None	None	-0.016	1.36	0.499	-0.06	-0.027	0.682	1.083	1.206	0.432	0	1.383	0.292	1.116	0.867	0.174	0.869	1.206	0.904
163.m03022	CNAG_07453	None	None	SPCC18B5.10c	None	None	None	None	KOG1407	S	WD40 repeat protein	conserved hypothetical protein	None	TREX complex subunit Tex1 (predicted)	None	None	None	None	None	None	None	None	None	0.065	0.534	0.419	-0.421	-0.234	0.1	0.211	0.323	-0.44	0.132	0.969	0.109	0.229	-0.399	0.195	0.107	-0.221	-0.22
163.m03767	CNAG_00864	None	None	None	None	None	None	None	KOG0017	R	FOG: Transposon-encoded proteins with TYA, reverse transcriptase, integrase domains in various combinations	myo-inositol transporter	None	None	None	None	None	None	None	None	None	None	None	-0.262	1.232	0.592	-0.354	0.53	0.138	0.011	-0.068	0.308	0.201	0.069	0.236	0.203	0.258	-0.097	-0.187	0.281	-0.255
163.m03769	None	None	None	None	None	None	None	None	None	None	None	None	None	None	None	None	None	None	None	None	None	None	None	-0.047	1.204	0.75	-0.117	0.491	0.268	0.139	0.326	-0.086	0.168	0.208	0.388	0.41	-0.2	0.372	0.149	0.6	0.067
163.m03771	CNAG_00867	None	None	None	None	None	None	None	KOG0017	R	FOG: Transposon-encoded proteins with TYA, reverse transcriptase, integrase domains in various combinations	myo-inositol transporter	None	None	None	None	None	None	None	None	None	None	None	-0.098	1.225	0.567	-0.352	0.765	0.284	-0.044	-0.323	0.466	0.107	0.528	0.236	0.169	-0.176	-0.006	-0.107	0.556	-0.085
163.m03772	CNAG_00869	YDR406W	PDR15	SPCC18B5.01c	bfr1	orf19.6000	ca6066	CDR1	KOG0065	Q	Pleiotropic drug resistance proteins (PDR1-15), ABC superfamily	ATP-binding cassette transporter	Plasma membrane ATP binding cassette (ABC) transporter, multidrug transporter and general stress response factor implicated in cellular detoxification; regulated by Pdr1p, Pdr3p and Pdr8p; promoter contains a PDR responsive element	brefeldin A efflux transporter Bfr1	multidrug resistance protein (by homology)	None	None	Cne_FxR-up_2.0	None	None	None	Cne_FxSR-up_2.0	None	-0.204	0.88	0.259	-0.292	0.512	0.148	-0.049	-0.116	0.123	0.214	0.047	0.166	0.068	0.195	-0.129	-0.163	0.088	-0.163
163.m03773	None	None	None	None	None	None	None	None	None	None	None	None	None	None	None	None	None	None	None	None	None	None	None	0.13	0.458	0.297	-0.356	-0.043	0.05	0.143	0.45	-0.516	0.182	0.816	0.334	0.404	-0.385	0.392	0.343	-0.251	-0.098
163.m03775	CNAG_00874	YBL024W	NCL1	SPAC23C4.17	None	orf19.518	ca4235	NCL1	KOG2198	J	tRNA cytosine-5-methylases and related enzymes of the NOL1/NOP2/sun superfamily	tRNA (cytosine-5-)-methyltransferase	S-adenosyl-L-methionine-dependent tRNA: m5C-methyltransferase, methylates cytosine to m5C at several positions in tRNAs and intron-containing pre-tRNAs; similar to Nop2p and human proliferation associated nucleolar protein p120	tRNA (cytosine-5-)-methyltransferase (predicted)	Probable proliferating-cell nucleolar antigen (by homology)	None	None	None	None	None	None	None	None	-0.012	0.903	0.357	-0.377	0.443	0.22	-0.144	-0.315	0.088	0.099	0.431	0.114	0.005	-0.315	-0.172	-0.102	-0.035	-0.095
163.m03776	CNAG_00875	None	None	None	None	None	None	None	KOG0098	U	GTPase Rab2, small G protein superfamily	GTPase	None	None	None	None	Cne_OsR-dw_2.0	None	None	None	None	None	Cne_OsSR-dw_2.0	0.402	0.56	0.151	-0.183	0.713	0.165	-0.07	0.152	0.197	0.19	0.243	0.15	0.128	-0.4	0.333	-0.166	-0.203	-0.144
163.m03777	CNAG_00876	YOL152W	FRE7	None	None	orf19.7077	ca5621	FRE7	KOG0039	PQ	Ferric reductase, NADH/NADPH oxidase and related proteins	ferric-chelate reductase	Putative ferric reductase with similarity to Fre2p; expression induced by low copper levels	None	Ferric reductase transmembrane component (by homology)	None	Cne_OsR-dw_2.0	None	Cne_FxR-dw_2.0	None	None	None	None	-0.304	-0.29	0.092	-0.42	1.526	0.453	0.165	0.448	-0.528	0.094	1.097	-0.572	0.627	0.206	0.879	-0.15	1.424	-0.231
163.m03779	CNAG_00884	YLR166C	SEC10	SPAC13F5.06c	sec10	orf19.3086	ca2012	SEC10	KOG3745	U	Exocyst subunit - Sec10p	exocyst complex component protein	Essential 100kDa subunit of the exocyst complex (Sec3p, Sec5p, Sec6p, Sec8p, Sec10p, Sec15p, Exo70p, and Exo84p), which has the essential function of mediating polarized targeting of secretory vesicles to active sites of exocytosis	exocyst complex subunit Sec10	Required for exocytosis (by homology)	None	None	None	None	None	None	None	None	0.319	0.887	0.501	-0.158	0.77	-0.049	0.244	0.338	0.243	0.211	0.192	0.381	0.238	-0.268	0.104	0.057	0.215	-0.055
163.m03780	CNAG_00886	YER043C	SAH1	SPBC8D2.18c	None	orf19.3911	ca3018	SAH1	KOG1370	H	S-adenosylhomocysteine hydrolase	adenosylhomocysteinase	S-adenosyl-L-homocysteine hydrolase, catabolizes S-adenosyl-L-homocysteine which is formed after donation of the activated methyl group of S-adenosyl-L-methionine (AdoMet) to an acceptor	adenosylhomocysteinase (predicted)	S-adenosyl-L-homocysteine hydrolase by homology	Cne_OsR-up_2.0	None	None	None	None	Cne_OxR-dw_2.0	Cne_OsSR-up_2.0	Cne_OxSR-dw_2.0	0.347	0.622	0.212	0.038	-0.148	-0.22	-0.168	-0.148	-0.3	0.214	0.034	0.113	-0.36	0.257	-0.145	-0.343	0.045	-0.096
163.m03783	CNAG_00892	None	None	None	None	None	None	None	KOG2054	S	Nucleolar RNA-associated protein (NRAP)	conserved hypothetical protein	None	None	None	None	Cne_OsR-dw_2.0	None	None	None	None	None	Cne_OsSR-dw_2.0	0.133	0.465	0.398	-0.379	0.24	0.092	0.177	0.628	0.076	0.165	0.869	0.076	0.313	-0.457	0.267	0.148	0.166	-0.231
163.m03785	CNAG_00893	None	None	None	None	None	None	None	None	None	None	conserved hypothetical protein	None	None	None	None	None	None	None	None	None	None	None	-0.02	0.861	0.413	-0.298	0.5	0.228	-0.005	-0.309	0.309	0.112	0.474	0.088	0.05	-0.241	-0.171	-0.06	0.353	-0.064
163.m03786	CNAG_00891	YER036C	ARB1	SPBC16H5.08c	None	orf19.2183	ca3736	IPF5533	KOG0927	R	Predicted transporter (ABC superfamily)	ATP-binding cassette transporter	ATPase of the ATP-binding cassette (ABC) family involved in 40S and 60S ribosome biogenesis, has similarity to Gcn20p; shuttles from nucleus to cytoplasm, physically interacts with Tif6p, Lsg1p	ribosome biogenesis ATPase, Arb family (predicted)	ABC transporter (by homology)	Cne_OsR-up_2.0	None	None	None	None	Cne_OxR-dw_2.0	Cne_OsSR-up_2.0	Cne_OxSR-dw_2.0	0.033	0.897	0.356	-0.391	0.418	0.174	-0.029	-0.043	0.059	0.234	0	0.289	0.06	0.207	-0.293	-0.142	-0.017	-0.2
163.m03787	CNAG_00888	YKL190W	CNB1	SPCC830.06	None	orf19.4009	ca4776	CNB1	KOG0034	T	Ca2+/calmodulin-dependent protein phosphatase (calcineurin subunit B), EF-Hand superfamily protein	calcium-dependent protein serine/threonine phosphatase	Calcineurin B; the regulatory subunit of calcineurin, a Ca++/calmodulin-regulated type 2B protein phosphatase which regulates Crz1p (a stress-response transcription factor), the other calcineurin subunit is encoded by CNA1 and/or CMP1	calcineurin regulatory subunit (predicted)	Protein phosphatase, Calcineurin B (by homology)	None	None	None	None	None	None	None	None	0.192	0.865	0.519	-0.112	0.359	-0.113	0.037	0.076	-0.347	0.13	0.476	0.191	0.063	-0.779	-0.204	0.054	-0.563	-0.004
163.m03788	CNAG_00883	None	None	None	None	None	None	None	None	None	None	transcription factor	None	None	None	None	None	None	None	Cne_OxR-up_2.0	None	Cne_OxSR-up_2.0	None	0.009	0.784	0.397	-0.293	0.365	0.041	-0.034	0.114	-0.013	0.107	0.328	0.453	0.189	-0.682	-0.109	-0.023	-0.443	-0.29
163.m03790	CNAG_00879	YDL215C	GDH2	SPCC132.04c	None	orf19.2192	ca1775	GDH2	KOG2250	E	Glutamate/leucine/phenylalanine/valine dehydrogenases	glutamate dehydrogenase	NAD(+)-dependent glutamate dehydrogenase, degrades glutamate to ammonia and alpha-ketoglutarate; expression sensitive to nitrogen catabolite repression and intracellular ammonia levels	NAD-dependent glutamate dehydrogenase (predicted)	NAD-specific glutamate dehydrogenase (NAD) (by homology)	None	None	None	None	None	None	None	None	0.56	0.481	0.34	-0.128	0.773	0.298	-0.073	0.092	0.299	0.114	0.406	0.12	0.509	-0.081	0.138	0.037	-0.09	0.392
163.m03791	CNAG_00877	YER170W	ADK2	None	None	None	None	None	KOG3078	F	Adenylate kinase	adenylate kinase	Mitochondrial adenylate kinase, catalyzes the reversible synthesis of GTP and AMP from GDP and ADP; may serve as a back-up for synthesizing GTP or ADP depending on metabolic conditions; 3' sequence of ADK2 varies with strain background	None	None	None	None	None	None	None	None	None	None	0.094	0.596	0.32	-0.237	0.331	-0.071	-0.148	0.161	-0.334	0.087	0.357	0.222	0.046	-0.672	-0.155	-0.065	-0.62	-0.323
163.m03793	CNAG_00896	None	None	None	None	None	None	None	KOG0017	R	FOG: Transposon-encoded proteins with TYA, reverse transcriptase, integrase domains in various combinations	transcription factor	None	None	None	None	None	None	None	None	None	None	None	0.132	1.13	0.721	-0.14	0.588	0.217	0.081	-0.002	0.178	0.154	0.506	0.482	0.402	-0.737	-0.013	0.127	-0.047	0.043
163.m03795	CNAG_00897	None	None	None	None	orf19.7362	ca5660	SKN1.3f	None	None	None	glucosidase	None	None	Glucan synthase subunit, 3-prime end	Cne_OsR-up_2.0	None	None	None	Cne_OxR-up_2.0	None	None	None	0.346	-0.014	0.049	-0.185	0.266	-0.058	-0.257	0.028	-0.494	0.026	0.359	0.074	-0.14	-0.69	-0.447	-0.271	-0.927	-0.15
163.m03796	CNAG_00898	None	None	None	None	None	None	None	KOG0254	R	Predicted transporter (major facilitator superfamily)	multidrug efflux pump	None	None	None	None	None	None	None	None	None	None	None	0.136	1.312	0.341	-0.17	0.817	0.186	0.34	0.413	0.06	0.166	0.206	0.738	0.552	-0.314	0.539	0.241	0.261	0.113
163.m03802	CNAG_07449	YBR132C	AGP2	None	None	orf19.4679	ca3244	AGP2	KOG1286	E	Amino acid transporters	amino acid transporter	High affinity polyamine permease, preferentially uses spermidine over putrescine; expression is down-regulated by osmotic stress; plasma membrane carnitine transporter, also functions as a low-affinity amino acid permease	None	amino-acid permease (by homology)	None	None	None	None	None	None	None	None	-0.018	1.105	0.384	-0.239	0.545	-0.043	0.102	0.044	0.222	0.099	0.532	0.262	0.532	-0.692	-0.035	0.074	-0.308	0.19
163.m03803	CNAG_07448	YHL016C	DUR3	SPBC23G7.13c	None	orf19.781	ca2279	DUR31	KOG2348	E	Urea transporter	urea transporter	Plasma membrane transporter for both urea and polyamines, expression is highly sensitive to nitrogen catabolite repression and induced by allophanate, the last intermediate of the allantoin degradative pathway	urea transporter (predicted)	Urea transport protein (by homology)	Cne_OsR-up_2.0	None	None	None	None	None	Cne_OsSR-up_2.0	None	-0.02	0.655	0.333	-0.305	0.25	-0.005	-0.175	0.066	0.121	0.046	0.359	0.08	-0.122	-0.692	-0.212	-0.242	-0.194	-0.212
163.m03804	CNAG_01040	None	None	None	None	None	None	None	KOG1282	OE	Serine carboxypeptidases (lysosomal cathepsin A)	carboxypeptidase D	None	None	None	None	None	None	None	None	None	None	None	-0.092	-0.586	-0.59	-0.271	-0.157	0.003	-0.012	0.362	-0.313	0.168	1.214	-0.673	-0.018	-0.721	-0.168	-0.159	-0.912	-0.191
163.m03805	CNAG_00920	YNL200C	None	SPAC15A10.05c	mug182	orf19.3679	ca4048	IPF9207	KOG2585	S	Uncharacterized conserved protein	protein-binding protein	None	YjeF family protein	unknown function	None	None	None	None	None	None	None	None	0.579	0.356	0.207	-0.281	0.432	0	0.219	0.298	-0.003	0.216	0.171	0.092	0.321	-0.196	-0.036	0.289	-0.022	0.287
163.m03806	CNAG_00926	YGL065C	ALG2	SPBC11B10.01	alg2	orf19.1221	ca1530	ALG2.5	KOG0853	M	Glycosyltransferase	glycolipid mannosyltransferase	Mannosyltransferase that catalyzes two consecutive steps in the N-linked glycosylation pathway; alg2 mutants exhibit temperature-sensitive growth and abnormal accumulation of the lipid-linked oligosaccharide Man2GlcNAc2-PP-Dol	mannosyltransferase complex subunit Alg2	mannosyltransferase, 5-prime end (by homology)	None	None	None	None	None	None	None	None	0.139	0.957	0.704	-0.123	0.396	0.151	0.08	0.2	0.35	0.155	0.505	0.361	0.22	-0.674	-0.014	0.076	-0.245	0.146
163.m03807	CNAG_00927	None	None	SPCC1020.09	None	None	None	None	KOG2919	R	Guanine nucleotide-binding protein	guanyl nucleotide binding protein	None	WD repeat protein, human WDR79 family	None	None	None	None	None	None	None	None	None	0.016	0.962	0.22	-0.357	0.087	-0.025	0	0.176	0.325	0.098	0.402	0.404	0.093	-0.59	-0.13	0.027	-0.378	-0.231
163.m03809	CNAG_00930	YOL058W	ARG1	SPBC428.05c	arg12	orf19.7469	ca5818	ARG1	KOG1706	E	Argininosuccinate synthase	argininosuccinate synthase	Arginosuccinate synthetase, catalyzes the formation of L-argininosuccinate from citrulline and L-aspartate in the arginine biosynthesis pathway; potential Cdc28p substrate	argininosuccinate synthase (predicted)	argininosuccinate synthetase (by homology)	None	None	None	None	Cne_OxR-up_2.0	None	Cne_OxSR-up_2.0	None	0.381	0.168	-0.076	-0.308	0.039	-0.357	-0.215	0.485	-0.12	0.125	0.611	-0.208	-0.361	-0.525	-0.481	-0.261	-0.509	-0.066
163.m03810	CNAG_00931	YDR246W	TRS23	SPBC3B9.12	None	orf19.3673	ca4042	TRS23	KOG3369	U	Transport protein particle (TRAPP) complex subunit	protein transporter	One of 10 subunits of the transport protein particle (TRAPP) complex of the cis-Golgi which mediates vesicle docking and fusion; involved in endoplasmic reticulum (ER) to Golgi membrane traffic; human homolog is TRAPPC4	TRAPP complex subunit Trs23 (predicted)	targeting and fusion of ER to golgi transport vesicles by homology	None	None	None	None	Cne_OxR-up_2.0	None	Cne_OxSR-up_2.0	None	0.263	0.929	0.433	-0.231	0.578	0.226	0.053	0.059	0.397	0.158	0.133	0.278	0.14	0.349	-0.085	0.133	0.292	0.11
163.m03811	CNAG_00932	YMR090W	None	SPBC216.03	None	orf19.7531	ca5868	IPF351	KOG1203	G	Predicted dehydrogenase	conserved hypothetical protein	None	conserved fungal protein	unknown function	None	None	Cne_FxR-up_2.0	None	None	None	Cne_FxSR-up_2.0	None	0.424	0.137	0.266	-0.502	0.583	-0.049	0.072	0.309	0.163	0.169	0.046	0.036	0.191	-0.022	-0.451	-0.015	-0.359	0.099
163.m03813	CNAG_00923	YLR241W	None	SPAC2G11.09	None	orf19.5932	ca6118	IPF126	KOG1134	R	Uncharacterized conserved protein	membrane protein	None	DUF221 family protein	unknown function	None	None	None	None	None	None	None	None	0.216	1.08	0.565	-0.082	0.047	-0.084	0.158	0.334	0.547	0.132	0.519	0.553	0.528	-0.523	0.171	0.188	-0.127	0.18
163.m03814	CNAG_00921	None	None	SPAC688.04c	gst3	orf19.356	None	None	KOG0867	O	Glutathione S-transferase	glutathione transferase	None	glutathione S-transferase Gst3	None	None	None	Cne_FxR-up_2.0	None	None	None	Cne_FxSR-up_2.0	None	0.332	0.463	0.334	-0.281	0.45	-0.056	-0.126	0.149	0.136	0.053	0.388	0.228	-0.081	-0.529	-0.157	0.012	-0.444	-0.079
163.m03816	CNAG_00916	None	None	SPAC343.17c	None	None	None	None	KOG0772	S	Uncharacterized conserved protein, contains WD40 repeat	transcription factor	None	WD repeat protein, human WDR70 family	None	None	None	None	None	None	None	None	None	-0.139	1.117	0.35	-0.335	0.5	0.17	-0.158	-0.303	0.302	0.052	0.237	0.161	0.14	0.113	-0.217	-0.06	0.503	-0.213
163.m03817	CNAG_00914	None	None	None	None	None	None	None	None	None	None	glucosidase	None	None	None	Cne_OsR-up_2.0	None	None	None	None	None	Cne_OsSR-up_2.0	None	-0.107	0.376	0.073	-0.491	0.44	0.149	-0.068	-0.073	-0.073	-0.044	0.029	-0.217	-0.072	0.11	-0.234	-0.085	-0.343	-0.054
163.m03818	CNAG_00911	YJR154W	None	None	None	None	None	None	None	None	None	phytanoyl-CoA dioxygenase	None	None	None	None	None	None	None	None	None	None	None	-0.179	1.085	0.499	-0.339	0.559	0.241	-0.122	-0.323	0.22	0.06	0.22	0.263	0.248	0.14	-0.241	-0.046	0.575	-0.236
163.m03819	CNAG_00909	YKR072C	SIS2	None	None	None	None	None	KOG0672	PD	Halotolerance protein HAL3 (contains flavoprotein domain)	HAL3B protein	Negative regulatory subunit of the protein phosphatase 1 Ppz1p; involved in ion homeostasis and cell cycle progression	None	None	None	None	None	None	None	None	None	None	0.385	0.737	0.322	-0.209	0.542	0.266	-0.043	-0.033	-0.006	0.116	0.143	0.101	-0.067	0.15	-0.174	-0.021	0.163	0.135
163.m03820	CNAG_00905	None	None	None	None	None	None	None	KOG0254	R	Predicted transporter (major facilitator superfamily)	MFS transporter	None	None	None	None	None	None	None	None	None	None	None	-0.209	0.916	-0.143	-0.512	0.783	-0.083	0.081	-0.092	0.479	-0.036	-0.033	-0.482	0.42	0.164	-0.235	0.03	-0.262	-0.14
163.m03822	CNAG_00904	YKR105C	None	None	None	orf19.1942	ca3356	IPF9560	KOG0254	R	Predicted transporter (major facilitator superfamily)	aflatoxin efflux pump AFLT	None	None	unknown function	None	None	None	None	None	None	None	None	-0.006	0.589	-0.078	-0.356	0.391	0.011	-0.292	-0.315	0.014	0.05	0.214	-0.19	-0.167	0.011	-0.449	-0.188	0.034	-0.107
163.m03823	CNAG_00895	YGL255W	ZRT1	SPBC16D10.06	zrt1	orf19.1585	ca3160	ZRT2	KOG1558	P	Fe2+/Zn2+ regulated transporter	zinc ion transporter	High-affinity zinc transporter of the plasma membrane, responsible for the majority of zinc uptake; transcription is induced under low-zinc conditions by the Zap1p transcription factor	ZIP zinc transporter Zrt1	zinc transport protein (by homology)	Cne_OsR-up_2.0	None	None	Cne_FxR-dw_2.0	None	None	Cne_OsSR-up_2.0	Cne_FxSR-dw_2.0	0.25	0.279	0.498	-0.275	-0.542	-0.054	-0.292	0.077	-0.048	-0.023	-0.036	0.506	-0.724	0.034	-0.252	-0.305	-0.07	0.176
163.m03825	CNAG_00934	YIR027C	DAL1	None	None	orf19.5454	ca5801	DAL1	KOG2584	F	Dihydroorotase and related enzymes	allantoinase	Allantoinase, converts allantoin to allantoate in the first step of allantoin degradation; expression sensitive to nitrogen catabolite repression	None	allantoinase	Cne_OsR-up_2.0	None	None	None	None	None	Cne_OsSR-up_2.0	None	0.182	0.656	0.237	-0.342	0.745	0.21	0.405	0.456	0.767	0.138	-0.044	0.1	0.285	0.313	0.032	0.103	-0.08	0.126
163.m03826	CNAG_00935	None	None	SPAC23H4.09	cdb4	orf19.6507	ca4966	IPF3923	KOG2776	R	Metallopeptidase	curved DNA-binding protein Cdb4	None	curved DNA-binding protein Cdb4	unknown function	None	None	None	None	None	Cne_OxR-dw_2.0	None	Cne_OxSR-dw_2.0	0.786	0.722	0.462	-0.2	0.523	0.197	0.003	-0.046	0.422	0.139	0.078	0.271	0.143	0.261	0.031	0.128	0.297	0.324
163.m03829	CNAG_00938	None	None	None	None	None	None	None	KOG0714	O	Molecular chaperone (DnaJ superfamily)	conserved hypothetical protein	None	None	None	None	Cne_OsR-dw_2.0	None	None	Cne_OxR-up_2.0	None	Cne_OxSR-up_2.0	Cne_OsSR-dw_2.0	-0.036	0.806	-0.052	-0.342	0.409	0.132	-0.204	-0.061	0.042	0.043	0.211	-0.135	-0.085	0.029	-0.519	-0.217	0.116	-0.175
163.m03835	CNAG_00960	YER013W	PRP22	SPAC10F6.02c	prp22	orf19.4033	ca4797	PRP22	KOG0922	A	DEAH-box RNA helicase	pre-mRNA splicing factor	DEAH-box RNA-dependent ATPase/ATP-dependent RNA helicase, associates with lariat intermediates before the second catalytic step of splicing; mediates ATP-dependent mRNA release from the spliceosome and unwinds RNA duplexes	ATP-dependent RNA helicase Prp22	RNA-dependent ATPase (by homology)	None	None	None	None	Cne_OxR-up_2.0	None	Cne_OxSR-up_2.0	None	-0.062	0.786	0.217	-0.523	0.71	0.093	0.021	-0.04	0.188	-0.028	-0.033	0.081	0.225	0.088	-0.106	-0.002	-0.269	-0.169
163.m03836	CNAG_07445	YPR074C	TKL1	SPBC2G5.05	None	orf19.5112	ca3924	TKL1	KOG0523	G	Transketolase	transketolase	Transketolase, similar to Tkl2p; catalyzes conversion of xylulose-5-phosphate and ribose-5-phosphate to sedoheptulose-7-phosphate and glyceraldehyde-3-phosphate in the pentose phosphate pathway; needed for synthesis of aromatic amino acids	transketolase (predicted)	transketolase 1	None	None	None	None	None	Cne_OxR-dw_2.0	None	Cne_OxSR-dw_2.0	0.149	0.678	0.214	-0.301	0.241	0.007	-0.232	-0.336	0.052	0.048	0.2	0.055	-0.056	0.152	-0.227	-0.186	0.324	-0.069
163.m03838	CNAG_00939	None	None	None	None	None	None	None	None	None	None	glucan 1,3-beta-glucosidase	None	None	None	None	None	None	None	None	None	None	None	-0.3	1.492	0.347	-0.503	0.851	0.708	0.054	0.24	0.54	0.007	-0.027	0.154	0.405	0.187	-0.09	0.087	-0.163	-0.142
163.m03852	CNAG_01047	None	None	None	None	None	None	None	None	None	None	conserved hypothetical protein	None	None	None	None	None	Cne_FxR-up_2.0	None	None	None	Cne_FxSR-up_2.0	None	0.089	-0.829	0.031	-0.716	0.462	-0.1	0.127	0.086	0.237	0.113	0.179	-0.356	0.34	-0.206	-0.493	0.349	-0.154	0.513
163.m03854	CNAG_01038	None	None	None	None	None	None	None	KOG4197	R	FOG: PPR repeat	conserved hypothetical protein	None	None	None	None	None	None	None	None	None	None	None	-0.183	1.203	0.425	-0.355	0.631	0.127	-0.108	-0.293	0.24	0.063	0.216	0.212	0.197	0.151	-0.285	-0.111	0.453	-0.295
163.m03855	CNAG_01036	YPR176C	BET2	SPAC167.02	ptb1	orf19.7563	ca5969	BET2	KOG0366	O	Protein geranylgeranyltransferase type II, beta subunit	geranylgeranyltransferase beta subunit	Beta subunit of Type II geranylgeranyltransferase required for vesicular transport between the endoplasmic reticulum and the Golgi; provides a membrane attachment moiety to Rab-like proteins Ypt1p and Sec4p	geranylgeranyltransferase II beta subunit	beta subunit of geranylgeranyl transferase type2	None	None	None	None	None	Cne_OxR-dw_2.0	None	Cne_OxSR-dw_2.0	-0.228	1.042	0.279	-0.463	0.652	-0.252	0.047	0.071	0.211	-0.005	0.082	0.245	0.343	0.171	-0.14	0.024	-0.15	-0.167
163.m03856	CNAG_01033	YNL232W	CSL4	SPCC1840.11	csl4	orf19.1026	ca0142	CSL4	KOG3409	J	Exosomal 3'-5' exoribonuclease complex, subunit ski4 (Csl4)	exosome 3'->5 exonuclease subunit ski4	Subunit of the exosome, which is an essential complex present in both nucleus and cytoplasm that mediates RNA processing and degradation	exosome subunit Csl4	Involved in kinetochore-related function (by homology)	None	None	None	None	None	None	None	None	-0.068	1.024	0.326	-0.298	0.553	0.066	-0.111	-0.168	0.085	0.143	0.215	0.333	0.025	-0.556	-0.06	-0.098	0.13	-0.359
163.m03859	CNAG_01026	YLR299W	ECM38	SPAC664.09	ggt1	orf19.6053	ca4913	CIS2	KOG2410	E	Gamma-glutamyltransferase	gamma-glutamyltranspeptidase 1	Gamma-glutamyltranspeptidase, major glutathione-degrading enzyme; involved in detoxification of electrophilic xenobiotics; expression induced mainly by nitrogen starvation	gamma-glutamyltranspeptidase Ggt1	Gamma-glutamyltransferase (by homology)	None	None	None	None	Cne_OxR-up_2.0	None	Cne_OxSR-up_2.0	None	0.085	0.581	0.315	-0.429	0.557	-0.146	-0.091	-0.304	-0.112	0.013	0.56	0.246	-0.068	-0.51	-0.293	-0.165	-0.323	-0.151
163.m03860	CNAG_01019	YJR104C	SOD1	SPAC821.10c	sod1	orf19.2770.1	ca4120	SOD1	KOG0441	P	Cu2+/Zn2+ superoxide dismutase SOD1	Cu/Zn superoxide dismutase	Cytosolic superoxide dismutase; some mutations are analogous to those that cause ALS (amyotrophic lateral sclerosis) in humans	superoxide dismutase Sod1	Cu,Zn-superoxide dismutase	None	None	None	None	None	None	None	None	1.555	0.481	0.312	0.55	-0.99	-1.279	0.695	-0.062	0.295	-0.054	-0.025	0.246	-1.316	-0.526	-1.536	0.424	-0.419	0.653
163.m03861	CNAG_01018	YER025W	GCD11	SPBC17G9.09	tif213	orf19.4223	ca1322	GCD11	KOG0466	J	Translation initiation factor 2, gamma subunit (eIF-2gamma; GTPase)	eukaryotic translation initiation factor 2 gamma	Gamma subunit of the translation initiation factor eIF2, involved in the identification of the start codon; binds GTP when forming the ternary complex with GTP and tRNAi-Met	translation initiation factor eIF2 gamma subunit	Translation initiation factor eIF2 (by homology)	None	None	None	None	None	None	None	None	0.33	0.158	-0.222	-0.373	0.43	0	-0.327	-0.206	-0.037	0.111	0.247	-0.132	-0.238	-0.694	-0.53	-0.313	-0.365	-0.117
163.m03864	CNAG_01021	YER055C	HIS1	SPAC25G10.05c	his1	orf19.4026	ca4792	HIS1	KOG2831	E	ATP phosphoribosyltransferase	ATP phosphoribosyltransferase	ATP phosphoribosyltransferase, a hexameric enzyme, catalyzes the first step in histidine biosynthesis; mutations cause histidine auxotrophy and sensitivity to Cu, Co, and Ni salts; transcription is regulated by general amino acid control	ATP phosphoribosyltransferase	ATP phosphoribosyltransferase	None	None	None	None	Cne_OxR-up_2.0	None	Cne_OxSR-up_2.0	None	0.557	0.472	0.369	-0.362	0.635	-0.064	0.234	0.339	0.159	0.182	0.005	0.071	0.028	0.153	-0.159	-0.136	-0.185	0.113
163.m03866	CNAG_01025	None	None	None	None	None	None	None	KOG0173	O	20S proteasome, regulatory subunit beta type PSMB7/PSMB10/PUP1	conserved hypothetical protein	None	None	None	None	None	None	None	None	None	None	None	0.332	0.707	0.379	-0.182	0.399	0.079	-0.054	-0.118	0.251	0.128	0.113	0.121	-0.175	0.149	-0.322	-0.085	0.042	0.029
163.m03867	CNAG_01027	YBR006W	UGA2	SPAC1002.12c	None	orf19.4543	ca4201	IPF8048	KOG2451	C	Aldehyde dehydrogenase	succinate-semialdehyde dehydrogenase	Succinate semialdehyde dehydrogenase involved in the utilization of gamma-aminobutyrate (GABA) as a nitrogen source; part of the 4-aminobutyrate and glutamate degradation pathways; localized to the cytoplasm	succinate-semialdehyde dehydrogenase (predicted)	probable succinate-semialdehyde dehydrogenase (by homology)	None	None	None	None	None	None	None	None	0.007	0.558	0.193	-0.482	0.739	-0.127	-0.026	-0.304	-0.216	0.048	0.707	0.092	0.054	-0.408	-0.136	-0.005	-0.356	-0.258
163.m03869	CNAG_01035	YOL038W	PRE6	SPBC106.16	None	orf19.544.1	ca4257	PRE6	KOG0183	O	20S proteasome, regulatory subunit alpha type PSMA7/PRE6	proteasome subunit alpha type-7	Alpha 4 subunit of the 20S proteasome; may replace alpha 3 subunit (Pre9p) under stress conditions to create a more active proteasomal isoform; GFP-fusion protein relocates from cytosol to the mitochondrial surface upon oxidative stress	20S proteasome component alpha 4	20S proteasome subunit	None	None	Cne_FxR-up_2.0	None	None	None	Cne_FxSR-up_2.0	None	0.36	0.835	0.267	-0.287	0.504	-0.002	-0.11	-0.08	-0.012	0.137	0.202	0.191	0.011	-0.522	-0.049	0.029	-0.01	-0.268
163.m03870	CNAG_01037	YPL164C	MLH3	None	None	orf19.7257	ca5372	MLH3	None	None	None	Mlh3p	Protein involved in DNA mismatch repair and crossing-over during meiotic recombination; forms a complex with Mlh1p; mammalian homolog is implicated mammalian microsatellite instability	None	DNA mismatch repair by homology	None	None	None	None	None	None	None	None	0.137	0.793	0.307	-0.388	0.933	0.239	0.399	0.41	-0.464	0.162	0.043	0.209	0.34	0.338	0.275	0.054	-0.101	0.061
163.m03872	CNAG_01040	None	None	None	None	None	None	None	KOG1282	OE	Serine carboxypeptidases (lysosomal cathepsin A)	carboxypeptidase D	None	None	None	None	None	None	None	None	None	None	None	-0.052	0.421	0.363	-0.166	0.408	0.13	0.031	0.667	0.083	0.203	0.182	-0.165	-0.22	0.109	-0.251	-0.067	-0.049	-0.008
163.m03873	CNAG_01043	None	None	None	None	None	None	None	None	None	None	conserved hypothetical protein	None	None	None	None	None	None	None	None	None	None	None	0.196	-1.001	-0.888	-0.786	0.405	-0.067	0.336	-0.169	0.113	0.136	0.416	-0.874	0.229	-0.289	-0.568	0.428	-0.488	0.524
163.m03879	CNAG_01049	YHR072W-A	NOP10	SPAP27G11.13c	nop10	orf19.596.1	ca3424	NOP10	KOG3503	A	H/ACA snoRNP complex, subunit NOP10	predicted protein	Constituent of small nucleolar ribonucleoprotein particles containing H/ACA-type snoRNAs, which are required for pseudouridylation and processing of pre-18S rRNA	small nucleolar ribonucleoprotein Nop10	Nucleolar rRNA processing protein (by homology)	None	None	None	None	None	Cne_OxR-dw_2.0	None	Cne_OxSR-dw_2.0	0.222	0.316	0.286	-0.358	0.295	0.055	0.391	0.272	-0.541	0.117	0.082	-0.031	0.053	0.096	-0.162	-0.057	-0.431	0.069
163.m03880	CNAG_01051	None	None	None	None	None	None	None	None	None	None	dynactin	None	None	None	None	None	None	None	None	None	None	None	-0.128	0.962	0.379	-0.429	0.52	-0.123	-0.039	-0.239	-0.096	0.035	0.715	0.36	0.061	-0.55	-0.339	-0.097	-0.406	-0.318
163.m03881	CNAG_01052	None	None	None	None	None	None	None	KOG1836	W	Extracellular matrix glycoprotein Laminin subunits alpha and gamma	conserved hypothetical protein	None	None	None	None	Cne_OsR-dw_2.0	None	None	Cne_OxR-up_2.0	None	Cne_OxSR-up_2.0	Cne_OsSR-dw_2.0	0.469	-0.333	-0.116	-0.41	0.855	0.394	-0.028	0.599	0.685	0.347	0.356	-0.054	0.383	0.055	-0.001	0.324	0.13	0.614
163.m03884	CNAG_00978	None	None	None	None	orf19.1682	ca0216	IPF11681	KOG2865	C	NADH:ubiquinone oxidoreductase, NDUFA9/39kDa subunit	NADH dehydrogenase	None	None	unknown function	None	None	None	None	None	Cne_OxR-dw_2.0	None	Cne_OxSR-dw_2.0	0.252	0.698	0.084	-0.26	0.4	-0.063	-0.17	-0.19	-0.037	0.139	0.187	0.077	-0.151	-0.596	-0.507	-0.131	-0.13	-0.309
163.m03886	CNAG_00987	YGR078C	PAC10	SPAC3H8.07c	None	orf19.5985	ca6076	PAC10	KOG3313	O	Molecular chaperone Prefoldin, subunit 3	prefoldin subunit	Part of the heteromeric co-chaperone GimC/prefoldin complex, which promotes efficient protein folding	prefoldin subunit 3 (predicted)	Non-native Actin Binding Complex Component (by homology)	None	None	None	None	None	Cne_OxR-dw_2.0	None	Cne_OxSR-dw_2.0	-0.143	0.909	0.098	-0.476	0.39	-0.08	-0.18	-0.251	-0.33	0.037	0.692	0.258	-0.092	-0.641	-0.222	-0.161	-0.345	-0.3
163.m03887	CNAG_00989	None	None	SPBC409.06	uch2	orf19.3930	ca0784	YUH1	KOG2778	O	Ubiquitin C-terminal hydrolase	ubiquitin-specific protease	None	ubiquitin C-terminal hydrolase Uch2	Putative ubiquitin carboxyl-terminal hydrolase-like protein (by homology)	None	None	None	None	None	None	None	None	0.333	0.642	0.456	-0.318	-0.542	-0.003	0.171	0.678	-0.499	0.147	0.996	0.137	0.201	-0.252	0.206	0.187	-0.182	-0.016
163.m03888	CNAG_00991	YKL113C	RAD27	SPAC3G6.06c	rad2	orf19.547	ca4258	IPF4279	KOG2519	L	5'-3' exonuclease	flap endonuclease	5' to 3' exonuclease, 5' flap endonuclease, required for Okazaki fragment processing and maturation as well as for long-patch base-excision repair; member of the S. pombe RAD2/FEN1 family	FEN-1 endonuclease	unknown function	None	None	None	None	None	Cne_OxR-dw_2.0	None	Cne_OxSR-dw_2.0	0.048	1.199	0.483	-0.267	0.677	0.099	-0.068	-0.104	0.07	0.164	0.166	0.421	0.043	-0.553	0.017	-0.046	-0.053	-0.355
163.m03889	CNAG_00992	YDL131W	LYS21	SPBC1105.02c	lys4	orf19.772	ca0261	LYS22	KOG2367	E	Alpha-isopropylmalate synthase/homocitrate synthase	homocitrate synthase	Homocitrate synthase isozyme, catalyzes the condensation of acetyl-CoA and alpha-ketoglutarate to form homocitrate, which is the first step in the lysine biosynthesis pathway; highly similar to the other isozyme, Lys20p	homocitrate synthase (predicted)	Homocitrate synthase (by homology)	None	None	None	None	Cne_OxR-up_2.0	None	Cne_OxSR-up_2.0	None	0.223	0.652	0.308	-0.471	0.36	-0.135	-0.107	-0.229	-0.356	0.012	0.43	0.145	-0.073	-0.416	-0.281	-0.082	-0.407	-0.186
163.m03891	CNAG_00996	YJR143C	PMT4	SPBC16C6.09	ogm4	orf19.4109	ca4314	PMT4	KOG3359	O	Dolichyl-phosphate-mannose:protein O-mannosyl transferase	O-mannosyltransferase	Protein O-mannosyltransferase, transfers mannose residues from dolichyl phosphate-D-mannose to protein serine/threonine residues; appears to form homodimers in vivo and does not complex with other Pmt proteins; target for new antifungals	protein O-mannosyltransferase Ogm4	Mannosyltransferase (by homology)	None	None	None	Cne_FxR-dw_2.0	None	None	None	Cne_FxSR-dw_2.0	0.217	0.592	0.165	-0.186	0.506	0.204	-0.087	-0.084	0.155	0.145	0.211	0.047	0.05	-0.495	-0.066	-0.003	0.04	-0.25
163.m03915	CNAG_01005	YCL035C	GRX1	SPAC15E1.09	grx2	orf19.6509	ca4964	IPF3920	KOG1752	O	Glutaredoxin and related proteins	glutathione transferase	Hydroperoxide and superoxide-radical responsive heat-stable glutathione-dependent disulfide oxidoreductase with active site cysteine pair; protects cells from oxidative damage	glutaredoxin Grx2	unknown function	None	None	None	None	None	None	None	None	0.766	0.389	-0.021	-0.209	0.256	0.266	-0.137	0.188	-0.573	0.204	0.223	0.196	0.051	-0.137	-0.28	0.084	-0.58	0.414
163.m03916	CNAG_01010	None	None	None	None	orf19.3516	ca0805	IPF12568	None	None	None	conserved hypothetical protein	None	None	unknown function	None	None	Cne_FxR-up_2.0	None	None	None	Cne_FxSR-up_2.0	None	0.353	0.276	0.218	-0.43	0.093	0.219	0.158	0.474	0.435	0.153	0.888	0.129	0.27	-0.216	0.069	0.162	-0.387	0.189
163.m03917	CNAG_01013	YBR175W	SWD3	SPBC354.03	swd3	orf19.3457	ca0720	IPF17932	KOG0266	R	WD40 repeat-containing protein	chromatin binding protein	Essential subunit of the COMPASS (Set1C) complex, which methylates histone H3 on lysine 4 and is required in transcriptional silencing near telomeres; WD40 beta propeller superfamily member and ortholog of mammalian WDR5	WD repeat protein Swd3	unknown function	None	Cne_OsR-dw_2.0	None	Cne_FxR-dw_2.0	None	Cne_OxR-dw_2.0	None	Cne_CSR-dw_2.0	-0.116	0.232	-0.206	-0.303	0.406	0.012	-0.093	-0.012	0.276	0.118	0.595	0.282	-0.097	-0.365	0.199	-0.035	0.334	-0.019
163.m03918	CNAG_01008	None	None	None	None	None	None	None	KOG3798	R	Predicted Zn-dependent hydrolase (beta-lactamase superfamily)	cDNA sequence	None	None	None	None	None	None	None	None	None	None	None	-0.176	1.063	0.308	-0.314	0.513	0.091	-0.182	-0.329	0.171	0.061	0.208	0.251	0.149	0.157	-0.232	-0.161	0.311	-0.284
163.m03919	CNAG_01004	None	None	None	None	None	None	None	KOG4305	T	RhoGEF GTPase	conserved hypothetical protein	None	None	None	None	None	None	None	None	None	None	None	-0.156	1.179	0.351	-0.558	0.696	0.322	0.004	0.021	0.421	-0.03	0.015	0.245	0.324	0.24	-0.012	-0.035	-0.11	-0.267
163.m03920	CNAG_01003	YHR042W	NCP1	SPBC29A10.01	ccr1	orf19.2672	ca3327	NCP1	KOG1158	C	NADP/FAD dependent oxidoreductase	electron transporter	NADP-cytochrome P450 reductase; involved in ergosterol biosynthesis; associated and coordinately regulated with Erg11p	NADPH-cytochrome p450 reductase	NADPH-cytochrome P450 reductase	None	Cne_OsR-dw_2.0	None	Cne_FxR-dw_2.0	None	None	None	None	-0.089	1.042	0.079	-0.329	0.472	0.177	-0.139	-0.253	0.205	0.052	0.216	0.054	-0.008	0.103	-0.223	-0.199	0.309	-0.176
163.m03921	CNAG_01000	YBL079W	NUP170	SPAC890.06	None	orf19.2485	ca3806	IPF9224	KOG1900	YU	Nuclear pore complex, Nup155 component (D Nup154, sc Nup157/Nup170)	nucleoporin Nup157/170	Abundant subunit of the nuclear pore complex (NPC), required for proper localization of specific nucleoporins within the NPC, involved in nuclear envelope permeability and in chromosome segregation, has similarity to Nup157p	nucleoporin Nup157/170	similar to Saccharomyces cerevisiae Nup170p nuclear pore protein (by homology)	None	None	None	None	None	Cne_OxR-dw_2.0	None	Cne_OxSR-dw_2.0	-0.104	0.755	0.238	-0.508	0.697	-0.105	0.034	0.08	0.224	-0.005	0.034	-0.059	0.212	0.125	-0.148	-0.058	-0.16	-0.19
163.m03922	CNAG_00995	None	None	None	None	orf19.7310	ca5547	IPF5981	None	None	None	conserved hypothetical protein	None	None	similar to Saccharomyces cerevisiae Gin3p (by homology)	None	None	None	None	None	None	None	None	-0.079	-0.287	-0.349	-0.523	0.564	0.338	0.042	-0.268	0.453	0.111	0.354	-0.814	0.22	-0.07	-0.527	0.084	-0.076	0.355
163.m03923	CNAG_00994	None	None	SPBC3B9.08c	None	None	None	None	KOG3392	A	Exon-exon junction complex, Magoh component	mago nashi protein	None	Mago-nashi homolog	None	None	None	None	None	None	Cne_OxR-dw_2.0	None	Cne_OxSR-dw_2.0	0.415	0.692	0.469	-0.196	0.348	-0.267	-0.017	-0.137	-0.027	0.168	0.162	0.079	-0.161	-0.026	-0.203	-0.02	-0.125	0.115
163.m03924	CNAG_00993	YOR125C	CAT5	SPBC337.15c	coq7	orf19.1940	ca3358	IPF19984	KOG4061	R	DMQ mono-oxygenase/Ubiquinone biosynthesis protein COQ7/CLK-1/CAT5	coenzyme q10 biosynthesis protein	Protein required for ubiquinone (Coenzyme Q) biosynthesis; localizes to the matrix face of the mitochondrial inner membrane in a large complex with ubiquinone biosynthetic enzymes; required for gluconeogenic gene activation	ubiquinone biosynthesis protein Coq7	similar to Saccharomyces cerevisiae Cat5p involved in coenzyme Q (ubiquinone) biosynthesis (by homology)	None	None	None	None	None	None	None	None	-0.076	0.712	0.142	-0.541	0.759	0.414	0.086	0.048	0.12	-0.006	0.019	-0.18	0.109	0.085	-0.211	-0.057	-0.383	-0.162
163.m03925	CNAG_00990	None	None	SPBC29A3.10c	atp14	None	None	None	None	None	None	CIPB	None	F1-ATPase subunit H (predicted)	None	None	None	None	None	None	None	None	None	0.772	0.498	-0.122	-0.23	0.124	-0.111	-0.385	-0.303	-0.222	0.056	0.219	-0.048	-0.333	-0.012	-0.418	-0.235	-0.142	0.053
163.m03926	CNAG_00988	YLR347C	KAP95	SPAC1B1.03c	kap95	orf19.3681	ca1147	KAP95	KOG1241	YU	Karyopherin (importin) beta 1	importin beta-1 subunit	Karyopherin beta, forms a dimeric complex with Srp1p (Kap60p) that mediates nuclear import of cargo proteins via a nuclear localization signal (NLS), interacts with nucleoporins to guide transport across the nuclear pore complex	karyopherin Kap95	karyopherin-beta protein (by homology)	None	None	None	None	None	None	None	None	-0.055	0.615	0.244	-0.46	0.598	-0.012	0.201	0.192	0.019	0.004	-0.044	-0.006	0.244	0.189	-0.255	-0.001	-0.345	-0.143
163.m03927	CNAG_00986	YHR111W	UBA4	SPAC2G11.10c	None	orf19.2324	ca3346	IPF13356	KOG2017	H	Molybdopterin synthase sulfurylase	URM1 activating enzyme	Protein that activates Urm1p before its conjugation to proteins (urmylation); one target is the thioredoxin peroxidase Ahp1p, suggesting a role of urmylation in the oxidative stress response	URM1 activating enzyme (predicted)	molybdopterin biosynthesis (by homology)	None	None	None	None	None	None	None	None	0.683	0.266	-0.207	-0.148	0.484	-0.039	-0.262	0.237	-0.173	0.118	0.319	0.021	-0.296	-0.373	-0.316	-0.153	-0.415	0.382
163.m03928	CNAG_00984	None	None	None	None	None	None	None	KOG0725	R	Reductases with broad range of substrate specificities	glucose and ribitol dehydrogenase protein	None	None	None	None	None	None	None	None	None	None	None	-0.023	0.027	0.13	-0.493	0.691	0.106	0.077	-0.335	0.192	0.09	0.296	-0.324	0.366	0.04	-0.561	0.238	-0.004	0.222
163.m03929	CNAG_00982	None	None	None	None	None	None	None	KOG0533	A	RRM motif-containing protein	conserved hypothetical protein	None	None	None	None	None	None	None	None	None	None	None	0.202	0.366	0.236	-0.316	0.237	0	0.297	0.584	-0.91	0.174	1.02	0.005	0.535	-0.256	0.061	0.118	-0.478	-0.021
163.m03930	CNAG_00979	YLR411W	CTR3	SPCC1393.10	ctr4	None	None	None	KOG3386	P	Copper transporter	copper uptake transporter	High-affinity copper transporter of the plasma membrane, acts as a trimer; gene is disrupted by a Ty2 transposon insertion in many laboratory strains of S. cerevisiae	copper transporter complex subunit Ctr4	None	None	Cne_OsR-dw_2.0	None	Cne_FxR-dw_2.0	None	Cne_OxR-dw_2.0	None	Cne_CSR-dw_2.0	-1.836	-2.625	-3.411	-1.446	2.064	1.267	-0.393	-0.412	-2.241	0.09	0.382	-3.716	0.867	0.911	1.006	-1.286	-2.047	-0.876
163.m03931	CNAG_00977	YHR108W	GGA2	SPBC25H2.16c	None	orf19.3006	ca3121	GGA1	KOG1087	U	Cytosolic sorting protein GGA2/TOM1	VHS domain-containing protein	Golgi-localized protein with homology to gamma-adaptin, interacts with and regulates Arf1p and Arf2p in a GTP-dependent manner in order to facilitate traffic through the late Golgi	adaptin (predicted)	Arf-binding protein	None	None	None	None	None	None	None	None	-0.045	0.974	-0.143	-0.349	0.329	0.063	-0.239	-0.286	-0.111	0.09	0.188	-0.149	-0.066	0.007	-0.441	-0.226	-0.213	-0.169
163.m03932	CNAG_00976	None	None	SPBC56F2.09c	arg5	orf19.4630	ca0874	CPA1	KOG0370	R	Multifunctional pyrimidine synthesis protein CAD (includes carbamoyl-phophate synthetase, aspartate transcarbamylase, and glutamine amidotransferase)	carbamoyl-phosphate synthase	None	arginine specific carbamoyl-phosphate synthase Arg5 (predicted)	Arginine-specific carbamoylphosphate synthase, small chain	Cne_OsR-up_2.0	None	Cne_FxR-up_2.0	None	Cne_OxR-up_2.0	None	Cne_CSR-up_2.0	None	0.222	-0.176	0.101	-0.315	0.439	-0.644	-0.22	-0.296	-0.265	-0.071	0.15	0.182	-0.424	-0.399	-0.505	-0.195	-0.345	0.007
163.m03933	CNAG_00970	YBR029C	CDS1	SPBC13A2.03	None	orf19.1279	ca0213	CDS1	KOG1440	I	CDP-diacylglycerol synthase	phosphatidate cytidylyltransferase	Phosphatidate cytidylyltransferase (CDP-diglyceride synthetase); an enzyme that catalyzes that conversion of CTP + phosphate into diphosphate + CDP-diaclglyerol, a critical step in the synthesis of all major yeast phospholipids	phosphatidate cytidylyltransferase	CDP-diacylglycerol synthase (by homology)	None	None	None	None	None	None	None	None	0.148	0.777	0.371	-0.243	0.481	0.039	-0.126	-0.185	0.109	0.131	0.186	0.117	-0.006	-0.56	-0.206	-0.105	-0.035	-0.316
163.m04709	CNAG_01023	YDL003W	MCD1	SPCC338.17c	rad21	orf19.7634	ca6028	IPF607	KOG1213	D	Sister chromatid cohesion complex Cohesin, subunit RAD21/SCC1	nuclear cohesin complex protein	Essential protein required for sister chromatid cohesion in mitosis and meiosis; subunit of the cohesin complex; expression is cell cycle regulated and peaks in S phase	kleisin	unknown function	None	None	None	None	None	None	None	None	0.156	0.581	0.278	-0.13	-0.273	0.308	0.362	0.55	0.137	0.128	0.247	0.071	0.222	-0.282	-0.102	0.274	-0.277	0.026
163.m04711	CNAG_01044	YBR183W	YPC1	None	None	orf19.3104	ca4406	YDC1	KOG2329	I	Alkaline ceramidase	ceramidase	Alkaline ceramidase that also has reverse (CoA-independent) ceramide synthase activity, catalyzes both breakdown and synthesis of phytoceramide; overexpression confers fumonisin B1 resistance	None	alkaline dihydroceramidase (by homology)	None	Cne_OsR-dw_2.0	None	None	None	Cne_OxR-dw_2.0	None	None	0.634	-0.238	-0.062	-0.415	0.039	-0.156	0.167	0.216	-0.093	0.129	0.743	-0.014	0.248	-0.396	-0.178	0.124	-0.464	0.235
163.m04712	CNAG_03040	None	None	None	None	None	None	None	KOG0523	G	Transketolase	transketolase	None	None	None	None	None	None	None	None	None	None	None	0.708	-0.312	0.152	-0.505	0.827	0.32	0.353	0.39	0.666	0.229	0.438	0.268	0.378	-0.016	-0.176	0.515	-0.055	0.814
163.m04715	CNAG_00961	YOL048C	None	None	None	orf19.6405	ca5123	IPF1306	None	None	None	conserved hypothetical protein	None	None	unknown function	None	Cne_OsR-dw_2.0	None	None	None	None	None	Cne_OsSR-dw_2.0	-0.1	-0.583	-0.437	-0.599	0.41	0.546	0.615	0.353	0.788	0.52	1.118	-0.969	0.53	0.109	0.063	0.521	-0.048	0.854
163.m04717	CNAG_00971	YGL124C	MON1	SPAC1D4.03c	aut12	orf19.478	None	None	KOG0997	S	Uncharacterized conserved protein Sand	vacuolar fusion protein MON1	Protein required for fusion of cvt-vesicles and autophagosomes with the vacuole; associates, as a complex with Ccz1p, with a perivacuolar compartment; potential Cdc28p substrate	autophagy associated protein Aut12 (predicted)	None	None	None	None	None	None	None	None	None	0.226	0.337	-0.15	-0.275	-0.783	-0.066	0.298	0.789	-0.603	0.14	1.08	0.031	0.545	-0.326	0.184	0.382	-0.52	0.013
163.m04722	CNAG_01149	YHR158C	KEL1	SPCC1223.06	tea1	orf19.6092	ca3860	KEL1	KOG0379	R	Kelch repeat-containing proteins	conserved hypothetical protein	Protein required for proper cell fusion and cell morphology; functions in a complex with Kel2p to negatively regulate mitotic exit, interacts with Tem1p and Lte1p; localizes to regions of polarized growth; potential Cdc28p substrate	cell end marker Tea1	involved in cell fusion and morphology (by homology)	None	None	None	None	None	None	None	None	0.417	0.889	0.02	-0.046	0.218	0.004	0.366	0.675	0.13	0.146	0.227	0.242	0.498	-0.235	0.231	0.373	-0.031	0.14
163.m04745	CNAG_00873	None	None	None	None	None	None	None	KOG0781	U	Signal recognition particle receptor, alpha subunit	conserved hypothetical protein	None	None	None	None	Cne_OsR-dw_2.0	None	None	Cne_OxR-up_2.0	None	Cne_OxSR-up_2.0	Cne_OsSR-dw_2.0	-0.213	0.304	-0.392	-0.496	0.631	0.058	0.014	-0.165	0.191	0.091	0.772	-0.343	0.073	-0.355	-0.043	0.032	-0.218	-0.127
163.m04746	CNAG_00871	None	None	None	None	None	None	None	KOG4343	K	bZIP transcription factor ATF6	conserved hypothetical protein	None	None	None	Cne_OsR-up_2.0	None	None	None	None	None	Cne_OsSR-up_2.0	None	<no data>	<no data>	<no data>	<no data>	0.322	-0.585	0.678	<no data>	3.644	-0.115	<no data>	-2.322	-1.678	-0.837	-2.064	-0.415	<no data>	-1.078
163.m04752	CNAG_00901	None	None	None	None	None	None	None	None	None	None	conserved hypothetical protein	None	None	None	None	Cne_OsR-dw_2.0	None	None	None	None	None	Cne_OsSR-dw_2.0	0.17	0.515	-0.139	-0.302	0.292	-0.011	-0.379	-0.246	-0.209	0.108	0.219	-0.059	-0.235	-0.706	-0.42	-0.227	-0.36	-0.321
163.m04754	CNAG_07451	None	None	None	None	None	None	None	None	None	None	conserved hypothetical protein	None	None	None	None	None	None	None	Cne_OxR-up_2.0	None	Cne_OxSR-up_2.0	None	-0.148	0.831	0.097	-0.226	0.285	0.21	0.31	0.876	-0.218	0.155	0.56	-0.076	0.153	0.76	0.075	0.219	-0.202	0.017
163.m04757	CNAG_00922	None	None	None	None	None	None	None	KOG0338	A	ATP-dependent RNA helicase	conserved hypothetical protein	None	None	None	None	None	None	None	None	None	None	None	-0.092	0.764	0.255	-0.427	0.513	-0.09	-0.108	-0.209	-0.195	0.033	0.831	0.138	0.048	-0.603	-0.16	-0.039	-0.344	-0.301
163.m04762	CNAG_00929	None	None	None	None	None	None	None	KOG4613	RD	Predicted component of DNA replication checkpoint response mechanism (S-M checkpoint)	conserved hypothetical protein	None	None	None	None	Cne_OsR-dw_2.0	None	Cne_FxR-dw_2.0	None	None	None	None	0.103	0.867	0.312	-0.203	0.475	0.105	-0.116	-0.247	0.139	0.166	0.203	0.179	0.019	-0.571	-0.113	-0.045	-0.045	-0.227
163.m04763	CNAG_00917	YLR427W	MAG2	SPBP8B7.23	None	orf19.5676	ca4383	IPF8573	KOG2164	O	Predicted E3 ubiquitin ligase	alkylbase DNA N-glycosylase	Cytoplasmic protein of unknown function predicted to encode a DNA-3-methyladenine glycosidase II that catalyzes the hydrolysis of alkylated DNA	ubiquitin-protein ligase E3 (predicted)	unknown function	None	None	None	None	None	None	None	None	0.175	0.702	0.232	-0.477	0.5	-0.098	-0.159	-0.154	-0.092	0.061	0.525	0.117	-0.128	-0.556	-0.293	-0.111	-0.205	-0.088
163.m04765	CNAG_00906	None	None	SPCC14G10.02	None	None	None	None	KOG1791	S	Uncharacterized conserved protein	nucleolar protein	None	ribosome biogenesis protein Urb1	None	None	None	None	None	None	None	None	None	0.104	0.32	0.117	-0.155	0.389	-0.285	-0.369	-0.195	-0.115	0.154	0.227	-0.026	-0.363	-0.73	-0.63	-0.163	-0.185	-0.281
163.m04766	CNAG_00934	YIR027C	DAL1	None	None	orf19.5454	ca5801	DAL1	KOG2584	F	Dihydroorotase and related enzymes	allantoinase	Allantoinase, converts allantoin to allantoate in the first step of allantoin degradation; expression sensitive to nitrogen catabolite repression	None	allantoinase	Cne_OsR-up_2.0	None	None	None	None	None	Cne_OsSR-up_2.0	None	-0.045	0.886	-0.068	-0.016	0.25	-0.087	0.578	0.705	0.068	0.021	0.106	-0.08	0.309	0.394	-0.008	0.141	0.692	0.208
163.m04768	CNAG_00936	None	None	SPAC4A8.10	None	orf19.4128	ca1159	IPF13423	KOG4372	R	Predicted alpha/beta hydrolase	lipid particle protein	None	lipase (predicted)	unknown function	None	None	None	None	Cne_OxR-up_2.0	None	Cne_OxSR-up_2.0	None	0	0.789	0.258	-0.058	0.36	0.098	0.264	1.159	-0.183	0.171	0.528	0	0.383	0.868	0.002	0.244	-0.063	0.251
163.m04769	CNAG_00936	None	None	SPAC4A8.10	None	orf19.4128	ca1159	IPF13423	KOG4372	R	Predicted alpha/beta hydrolase	lipid particle protein	None	lipase (predicted)	unknown function	None	None	None	None	Cne_OxR-up_2.0	None	Cne_OxSR-up_2.0	None	0.317	0.504	-0.247	-0.006	0.36	0.04	0.279	0.611	0.158	-0.046	0.117	-0.119	0.08	0.196	-0.125	0.066	0.351	0.495
163.m04775	CNAG_00966	None	None	None	None	orf19.5393	ca5757	IPF1067	None	None	None	aromatic-L-amino-acid decarboxylase	None	None	Putative glutamate decarboxylase (by homology)	None	None	None	None	None	Cne_OxR-dw_2.0	None	Cne_OxSR-dw_2.0	-0.042	0.998	0.472	-0.421	0.243	-0.049	-0.065	-0.209	-0.375	0.088	0.867	0.292	0.09	-0.618	-0.13	-0.02	-0.467	-0.327
163.m04776	CNAG_00937	None	None	None	None	None	None	None	None	None	None	conserved hypothetical protein	None	None	None	None	None	None	None	None	None	None	None	-0.122	1.467	0.49	-0.208	1.176	0.255	0.733	1.624	0.132	0.21	0.548	0.497	0.725	1.056	0.321	0.465	0.305	0.336
163.m04780	CNAG_00998	None	None	None	None	None	None	None	KOG1721	R	1 FOG: Zn-finger	conserved hypothetical protein	None	None	None	None	None	None	None	None	None	None	None	-0.163	0.758	-0.003	0.168	0.522	0.095	0.467	0.461	0.144	-0.017	0.09	-0.095	0.34	0.324	0.203	0.054	0.75	0.457
163.m04781	CNAG_01002	YOL137W	BSC6	None	None	orf19.4090	ca4330	IPF2087	None	None	None	conserved hypothetical protein	Protein of unknown function containing 8 putative transmembrane seqments; ORF exhibits genomic organization compatible with a translational readthrough-dependent mode of expression	None	unknown function	Cne_OsR-up_2.0	None	None	None	Cne_OxR-up_2.0	None	None	None	-0.202	1.498	0.524	-0.166	0.314	0.125	0.554	0.596	0.06	0.267	0.721	0.506	0.588	0.844	0.21	0.322	-0.026	0.238
163.m04782	CNAG_01006	None	None	None	None	None	None	None	None	None	None	conserved hypothetical protein	None	None	None	None	None	None	None	None	None	None	None	0.09	0.564	0.192	-0.337	0.522	0.034	-0.155	-0.12	-0.022	0.141	0.193	0.125	-0.125	-0.548	-0.174	-0.065	-0.133	-0.155
163.m04783	CNAG_01007	None	None	None	None	None	None	None	KOG1030	R	Predicted Ca2+-dependent phospholipid-binding protein	C2 domain-containing protein	None	None	None	None	None	None	None	None	None	None	None	-0.123	0.922	-0.163	0.04	0.533	0.455	0.439	0.351	0.483	-0.047	-0.007	-0.142	0.358	0.322	0.166	0.244	0.802	0.389
163.m04784	CNAG_01011	None	None	None	None	None	None	None	None	None	None	conserved hypothetical protein	None	None	None	Cne_OsR-up_2.0	None	Cne_FxR-up_2.0	None	Cne_OxR-up_2.0	None	Cne_CSR-up_2.0	None	-0.151	1.422	0.558	-0.219	0.645	0.675	0.511	0.558	0.073	0.329	0.841	0.639	0.657	1.007	0.368	0.387	0.341	0.244
163.m04787	CNAG_01009	None	None	None	None	None	None	None	KOG1217	T	Fibrillins and related proteins containing Ca2+-binding EGF-like domains	conserved hypothetical protein	None	None	None	None	None	None	None	None	None	None	None	-0.198	0.799	0.24	-0.514	0.056	-0.085	-0.008	-0.022	-0.298	0.081	0.824	0.165	0.123	-0.526	-0.051	-0.071	-0.51	-0.355
163.m04792	CNAG_00997	None	None	None	None	None	None	None	None	None	None	hypothetical protein	None	None	None	None	None	None	None	None	Cne_OxR-dw_2.0	None	Cne_OxSR-dw_2.0	0.315	0.591	0.179	-0.04	0.175	0.108	0.077	0.302	-0.13	0.003	0.14	0.156	0.093	0.193	-0.008	-0.053	0.327	0.356
163.m04794	CNAG_00981	None	None	None	None	None	None	None	None	None	None	conserved hypothetical protein	None	None	None	None	None	None	None	None	None	None	None	0.051	0.892	0.257	-0.251	0.564	0.132	-0.061	-0.076	0.171	0.126	0.21	0.287	0.088	-0.562	-0.069	-0.032	0.009	-0.326
163.m04795	CNAG_01014	None	None	None	None	None	None	None	KOG1721	R	1 FOG: Zn-finger	conserved hypothetical protein	None	None	None	None	Cne_OsR-dw_2.0	None	None	Cne_OxR-up_2.0	None	Cne_OxSR-up_2.0	Cne_OsSR-dw_2.0	0.234	0.633	0.264	-0.139	0.304	0.023	0.083	0.505	-0.025	0.239	0.188	0.41	0.054	0.282	-0.015	0.116	0.111	0.398
163.m04796	CNAG_01017	YLR247C	IRC20	SPAC144.05	None	None	None	None	KOG0298	L	DEAD box-containing helicase-like transcription factor/DNA repair protein	conserved hypothetical protein	Putative helicase; localizes to the mitochondrion and the nucleus; YLR247C is not an essential gene; null mutant displays increased levels of spontaneous Rad52p foci	ATP-dependent DNA helicase (predicted)	None	None	None	None	None	None	None	None	None	0.019	0.827	0.255	-0.412	0.438	-0.14	-0.044	-0.067	-0.244	0.112	0.851	0.31	0.151	-0.625	-0.031	0.021	-0.33	-0.359
163.m04797	CNAG_01022	None	None	None	None	None	None	None	KOG0511	R	Ankyrin repeat protein	conserved hypothetical protein	None	None	None	None	None	None	None	None	Cne_OxR-dw_2.0	None	Cne_OxSR-dw_2.0	-0.17	1.103	0.372	-0.341	0.57	0.169	-0.138	-0.332	0.302	0.095	0.188	0.169	0.129	0.132	-0.181	-0.122	0.271	-0.342
163.m04799	CNAG_01032	None	None	None	None	None	None	None	KOG1984	U	Vesicle coat complex COPII, subunit SFB3	conserved hypothetical protein	None	None	None	None	None	None	None	None	None	None	None	-0.069	0.058	0.054	0.008	0.685	-0.246	0.144	0.353	0.029	-0.042	0.053	-0.115	-0.157	0.192	-0.478	-0.075	0.241	0.313
163.m04802	CNAG_01045	None	None	None	None	None	None	None	KOG4358	S	Uncharacterized conserved protein	conserved hypothetical protein	None	None	None	None	None	None	None	None	Cne_OxR-dw_2.0	None	Cne_OxSR-dw_2.0	0.217	1.07	0.553	-0.233	0.874	0.042	0.297	0.12	-0.156	0.136	0.559	0.453	0.158	-0.148	0.057	0.162	0.472	0.256
163.m04805	CNAG_01046	None	None	None	None	None	None	None	KOG2844	E	Dimethylglycine dehydrogenase precursor	N,N-dimethylglycine oxidase	None	None	None	None	None	None	None	None	None	None	None	-0.175	0.857	0.236	-0.498	0.54	0.203	0.113	0.054	0.209	0.019	0.018	-0.038	0.219	0.085	-0.149	-0.012	-0.418	-0.204
163.m04806	CNAG_01054	YNL222W	SSU72	SPAC3G9.04	ssu72	orf19.2402	ca0114	SSU72	KOG2424	K	Protein involved in transcription start site selection	phosphoprotein phosphatase	Transcription/RNA-processing factor that associates with TFIIB and cleavage/polyadenylation factor Pta1p; exhibits phosphatase activity on serine-5 of the RNA polymerase II C-terminal domain; affects start site selection in vivo	phosphoric ester hydrolase (predicted)	suppressor of cs mutant of sua7(by homology)	None	None	None	None	None	None	None	None	-0.134	1.143	0.457	-0.305	0.534	0.076	-0.05	-0.041	0.388	0.101	0.172	0.231	0.246	0.173	-0.088	-0.059	0.344	-0.23
163.m04807	CNAG_01053	None	None	SPBC3B9.16c	nup120	None	None	None	KOG4521	YU	Nuclear pore complex, Nup160 component	conserved hypothetical protein	None	nucleoporin Nup120	None	None	None	None	None	None	Cne_OxR-dw_2.0	None	Cne_OxSR-dw_2.0	-0.074	0.765	0.235	-0.517	0.545	0.122	0.165	0.186	0.21	0.028	-0.034	0.109	0.17	0.078	-0.151	0	-0.353	-0.236
163.m04808	CNAG_01050	None	None	SPBC1921.06c	pvg3	None	None	None	KOG2287	G	Galactosyltransferases	conserved hypothetical protein	None	beta-1,3-galactosyltransferase	None	None	None	None	None	None	None	None	None	0.241	0.439	-0.172	-0.367	0.215	0.088	-0.351	-0.218	-0.203	0.089	0.21	-0.033	-0.197	0.028	-0.447	-0.201	-0.172	-0.062
163.m04809	CNAG_01031	None	None	None	None	None	None	None	KOG1726	V	HVA22/DP1 gene product-related proteins	conserved hypothetical protein	None	None	None	None	None	None	None	None	None	None	None	-0.529	-0.425	-0.543	-0.563	0.798	0.138	0.044	0.069	0.655	0.066	0.157	-0.902	0.013	-0.115	-0.152	-0.025	-0.029	0.388
163.m04810	CNAG_01020	None	None	None	None	None	None	None	None	None	None	conserved hypothetical protein	None	None	None	None	None	None	None	None	Cne_OxR-dw_2.0	None	Cne_OxSR-dw_2.0	-0.131	0.878	0.2	-0.274	0.383	0.089	-0.239	-0.242	0.037	0.11	0.197	0.049	-0.061	0.094	-0.371	-0.194	0.119	-0.216
163.m04811	CNAG_01015	YOR238W	None	SPAC57A10.07	None	orf19.4061	ca1485	IPF20082	KOG4533	S	Uncharacterized conserved protein	cytoplasmic protein	None	conserved protein (fungal and protazoan)	unknown function	None	None	None	None	None	None	None	None	-0.102	0.672	0.148	-0.539	0.461	0.118	0.225	0.162	0.218	0.029	0.074	-0.015	0.255	-0.015	-0.314	-0.005	-0.422	-0.144
163.m04812	CNAG_01360	YJR091C	JSN1	SPBC56F2.08c	None	orf19.4262	ca0268	PUF2.3f	KOG4574	R	RNA-binding protein (contains RRM and Pumilio-like repeats)	pumilio domain-containing protein c	Member of the Puf family of RNA-binding proteins, interacts with mRNAs encoding membrane-associated proteins; overexpression suppresses a tub2-150 mutation and causes increased sensitivity to benomyl in wild-type cells	RNA-binding protein	RNA-binding protein, 3-prime end (by homology)	None	None	None	None	Cne_OxR-up_2.0	None	Cne_OxSR-up_2.0	None	0.065	0.877	0.124	-0.261	0.433	0.036	-0.198	-0.077	-0.001	0.14	0.132	0.066	-0.129	0.149	-0.284	-0.134	0.203	-0.146
163.m04813	CNAG_01362	None	None	SPAC30D11.09	cwf19	None	None	None	KOG2477	S	Uncharacterized conserved protein	cell cycle control protein cwf19	None	complexed with Cdc5 protein Cwf19	None	None	None	None	None	None	None	None	None	-0.191	0.808	0.263	-0.499	0.429	0.071	0.246	0.151	-0.032	-0.011	0.067	-0.184	0.263	0.065	-0.154	0.047	-0.254	-0.189
163.m04814	CNAG_01363	YJR072C	NPA3	SPBC119.15	None	orf19.6463	ca3663	IPF11432	KOG1532	L	GTPase XAB1, interacts with DNA repair protein XPA	XPA-binding protein 1	Essential, conserved, cytoplasmic ATPase; phosphorylated by the Pcl1p-Pho85p kinase complex	AAA family ATPase, unknown biological role	unknown function	None	None	None	None	None	None	None	None	-0.044	0.885	0.11	-0.309	0.353	-0.046	-0.228	-0.174	-0.128	0.102	0.172	-0.011	-0.089	0.016	-0.335	-0.166	0.011	-0.198
163.m04815	CNAG_01365	None	None	None	None	None	None	None	None	None	None	conserved hypothetical protein	None	None	None	None	None	None	None	None	None	None	None	0.003	0.931	0.399	-0.269	0.628	0.08	0.057	0.168	0.315	0.281	-0.026	0.317	0.16	0.331	-0.205	-0.146	0.46	0.122
163.m04816	CNAG_01371	YOR301W	RAX1	None	None	orf19.5903	ca6142	IPF1879	None	None	None	conserved hypothetical protein	Protein involved in bud site selection during bipolar budding; localization requires Rax2p; has similarity to members of the insulin-related peptide superfamily	None	unknown function	None	None	None	None	None	Cne_OxR-dw_2.0	None	Cne_OxSR-dw_2.0	0.104	1.175	0.578	-0.234	0.851	0.215	0.287	0.236	-0.071	0.116	0.554	0.468	0.414	-0.224	0.132	0.182	0.426	0.253
163.m04817	CNAG_01373	YCR002C	CDC10	SPAC821.06	spn2	orf19.548	ca4259	CDC10	KOG1547	DTZ	Septin CDC10 and related P-loop GTPases	septin ring protein	Component of the septin ring of the mother-bud neck that is required for cytokinesis; septins recruit proteins to the neck and can act as a barrier to diffusion at the membrane, and they comprise the 10nm filaments seen with EM	septin Spn2	cell division control protein	None	None	None	None	None	None	None	None	0.388	0.74	0.335	-0.129	0.45	0.052	0.043	0.217	0.087	0.304	0.006	0.325	-0.174	0.301	-0.055	-0.202	0.41	-0.011
163.m04818	CNAG_01375	YCR088W	ABP1	SPAPJ760.02c	app1	orf19.2699	ca3265	ABP1	KOG3655	Z	Drebrins and related actin binding proteins	conserved hypothetical protein	Actin-binding protein of the cortical actin cytoskeleton, important for activation of the Arp2/3 complex that plays a key role actin in cytoskeleton organization	App1 protein	actin-binding protein (by homology)	None	None	None	None	None	None	None	None	0.505	0.663	0.292	-0.242	0.703	0.039	0.099	-0.162	0.015	0.087	0.537	0.132	0.074	-0.339	-0.121	-0.005	0.1	0.42
163.m04819	CNAG_01379	None	None	None	None	None	None	None	KOG1798	L	DNA polymerase epsilon, catalytic subunit A	UPF0390 protein	None	None	None	None	None	None	None	None	None	None	None	0.194	0.593	0.449	-0.255	0.771	-0.07	0.008	0.134	0.449	0.302	0.024	0.264	0	0.29	-0.318	-0.055	0.463	0.188
163.m04820	CNAG_01381	YGR095C	RRP46	SPBC115.01c	rrp46	None	None	None	KOG1069	J	Exosomal 3'-5' exoribonuclease complex, subunit Rrp46	conserved hypothetical protein	Protein involved in rRNA processing; component of the exosome 3->5 exonuclease complex	exosome subunit Rrp46 (predicted)	None	None	None	None	None	None	None	None	None	0.338	0.472	0.232	-0.27	0.731	0.046	-0.304	-0.171	0.134	0.091	0.533	0.098	-0.094	-0.392	-0.108	-0.221	0.043	0.663
163.m04821	CNAG_01389	None	None	None	None	None	None	None	None	None	None	conserved hypothetical protein	None	None	None	None	None	None	None	None	None	None	None	-0.103	1.233	0.629	-0.296	0.776	0.171	0.199	0.104	0.608	0.285	-0.001	0.376	0.326	0.394	0.207	0.066	0.774	0.181
163.m04822	CNAG_01391	YDR168W	CDC37	SPBC9B6.10	cdc37	orf19.5531	ca0551	CDC37	KOG2260	D	Cell division cycle 37 protein, CDC37	CDC37	Essential Hsp90p co-chaperone; necessary for passage through the START phase of the cell cycle; stabilizes protein kinase nascent chains and participates along with Hsp90p in their folding	Hsp90 co-chaperone Cdc37	Cell division control protein (by homology)	None	None	None	None	None	None	None	None	0.046	0.728	0.228	-0.494	0.447	-0.001	0.186	-0.019	0.116	0.021	0.074	0.197	0.052	0.074	-0.194	-0.031	-0.465	-0.232
163.m06106	CNAG_01058	None	None	None	None	None	None	None	None	None	None	conserved hypothetical protein	None	None	None	None	None	None	None	None	None	None	None	0.162	1.191	0.507	-0.3	0.576	0.143	0.268	-0.097	-0.045	0.109	0.501	0.528	0.195	-0.245	0.142	0.095	0.331	0.305
163.m06107	CNAG_01060	None	None	SPAC25G10.01	None	None	None	None	KOG0118	R	FOG: RRM domain	conserved hypothetical protein	None	RNA-binding protein	None	None	None	None	None	None	None	None	None	0.515	0.516	0.187	-0.158	0.09	-0.262	-0.294	-0.175	-0.381	0.16	0.167	0.185	-0.229	-0.543	-0.231	-0.118	-0.333	-0.239
163.m06108	CNAG_01064	None	None	None	None	None	None	None	None	None	None	conserved hypothetical protein	None	None	None	None	None	None	None	None	None	None	None	0.003	0.975	0.306	-0.314	0.705	0.074	0.054	0.069	0.355	0.372	-0.022	0.276	0.327	0.377	-0.202	-0.067	0.529	0.09
163.m06110	CNAG_07443	None	None	None	None	None	None	None	KOG2483	K	Upstream transcription factor 2/L-myc-2 protein	conserved hypothetical protein	None	None	None	None	None	None	None	None	None	None	None	-0.27	1.009	0.321	-0.463	0.26	-0.113	-0.004	-0.069	0.088	0.109	0.93	0.039	0.132	-0.676	-0.086	-0.07	-0.14	-0.346
163.m06111	CNAG_01076	YGR019W	UGA1	SPAC19D5.07	uga1	None	None	None	KOG1405	E	4-aminobutyrate aminotransferase	4-aminobutyrate transaminase	Gamma-aminobutyrate (GABA) transaminase (4-aminobutyrate aminotransferase) involved in the 4-aminobutyrate and glutamate degradation pathways; required for normal oxidative stress tolerance and nitrogen utilization	4-aminobutyrate aminotransferase (GABA transaminase)	None	None	None	None	None	None	None	None	None	0.003	1.497	0.786	-0.182	0.825	0.293	0.343	-0.106	-0.11	0.152	0.624	0.62	0.553	-0.295	0.616	0.142	0.372	0.34
163.m06112	CNAG_01078	None	None	None	None	None	None	None	KOG2450	C	Aldehyde dehydrogenase	aldehyde dehydrogenase	None	None	None	None	None	None	None	None	None	None	None	-0.009	1.003	0.499	-0.233	0.537	-0.03	-0.006	-0.029	0.203	0.137	0.202	0.427	0.1	-0.653	-0.224	0.025	0.11	-0.329
163.m06113	CNAG_01080	None	None	SPAPB1A11.03	None	None	None	None	KOG0538	C	Glycolate oxidase	hydroxyacid oxidase	None	FMN dependent dehydrogenase	None	None	None	None	None	None	None	None	None	0.138	0.925	0.481	-0.383	0.658	0.007	-0.077	0.033	0.327	0.232	-0.03	0.325	0.238	0.151	-0.069	-0.116	0.39	0.219
163.m06114	CNAG_01081	None	None	None	None	None	None	None	KOG1502	V	Flavonol reductase/cinnamoyl-CoA reductase	conserved hypothetical protein	None	None	None	Cne_OsR-up_2.0	None	Cne_FxR-up_2.0	None	None	None	None	None	-0.155	0.667	0.218	-0.409	0.337	-0.096	-0.011	0.133	-0.028	0.094	0.855	0.004	0.175	-0.593	-0.142	0.009	-0.238	-0.281
163.m06115	CNAG_01082	None	None	None	None	None	None	None	KOG0504	R	FOG: Ankyrin repeat	conserved hypothetical protein	None	None	None	Cne_OsR-up_2.0	None	None	None	None	None	Cne_OsSR-up_2.0	None	-0.169	0.9	0.381	-0.211	0.435	0.19	0.331	0.495	0.156	0.39	0.51	0.135	0.481	0.785	0.146	0.372	0.158	0.48
163.m06116	CNAG_01086	None	None	None	None	None	None	None	KOG1808	R	AAA ATPase containing von Willebrand factor type A (vWA) domain	conserved hypothetical protein	None	None	None	None	None	None	None	Cne_OxR-up_2.0	None	Cne_OxSR-up_2.0	None	-0.164	0.972	0.054	-0.031	0.879	0.076	0.502	0.242	0.433	-0.003	0.019	-0.058	0.389	0.247	-0.112	0.162	0.708	0.193
163.m06117	CNAG_01099	None	None	SPBC1709.15c	cft2	orf19.325	ca3384	IPF8362	KOG1135	A	mRNA cleavage and polyadenylation factor II complex, subunit CFT2 (CPSF subunit)	cleavage and polyadenylation specificity factor subunit	None	cleavage factor two Cft2/polyadenylation factor CPSF-73 (predicted)	similar to Saccharomyces cerevisiae Cft2p involved in cleavage and polyadenylation specificity factor, part of CF II (by homology)	None	None	None	None	None	None	None	None	0.117	0.824	0.258	-0.194	0.521	-0.001	-0.214	-0.085	-0.003	0.166	0.219	0.254	-0.156	-0.617	-0.27	-0.149	-0.206	-0.31
163.m06119	CNAG_01097	YIL124W	AYR1	None	None	None	None	None	KOG1201	Q	Hydroxysteroid 17-beta dehydrogenase 11	short-chain dehydrogenase/reductase SDR	NADPH-dependent 1-acyl dihydroxyacetone phosphate reductase found in lipid particles, ER, and mitochondrial outer membrane; involved in phosphatidic acid biosynthesis; required for spore germination; capable of metabolizing steroid hormones	None	None	None	None	None	None	None	None	None	None	0.205	0.512	0.402	-0.472	0.308	-0.157	-0.095	0.058	-0.321	0.082	0.661	0.16	0.017	-0.42	-0.177	0.003	-0.308	-0.13
163.m06121	CNAG_01095	YNL320W	None	SPBC32H8.03	bem46	orf19.7627	ca6024	IPF615	KOG4391	R	Predicted alpha/beta hydrolase BEM46	BEM46 family protein	None	esterase/lipase (predicted)	unknown function	None	None	None	None	None	None	None	None	0.036	0.762	0.308	-0.219	0.595	0.05	-0.017	-0.069	0.049	0.16	0.226	0.273	0.091	-0.634	-0.185	0.084	-0.155	-0.258
163.m06122	CNAG_01100	None	None	None	None	None	None	None	KOG0931	U	Predicted guanine nucleotide exchange factor, contains Sec7 domain	conserved hypothetical protein	None	None	None	None	None	None	None	None	None	None	None	-0.093	1.147	0.559	-0.18	0.333	0.318	0.288	0.312	-0.162	0.429	0.506	0.419	0.504	0.735	-0.01	0.294	0.134	0.291
163.m06123	CNAG_01101	None	None	None	None	None	None	None	None	None	None	conserved hypothetical protein	None	None	None	None	None	None	None	None	None	None	None	-0.187	1.128	0.09	-0.113	0.771	0.211	0.463	0.195	0.322	-0.053	0.086	0.086	0.486	0.168	-0.038	0.054	0.747	0.31
163.m06124	CNAG_01102	None	None	SPAC4H3.08	None	None	None	None	KOG0725	R	Reductases with broad range of substrate specificities	oxidoreductase	None	short chain dehydrogenase (predicted)	None	None	None	Cne_FxR-up_2.0	Cne_FxR-dw_2.0	None	None	Cne_FxSR-up_2.0	Cne_FxSR-dw_2.0	-0.31	-0.799	-0.942	-0.48	0.63	0.836	0.473	0.187	0.733	0.816	1.158	-0.907	0.376	0.061	-0.003	0.507	-0.083	0.778
163.m06125	CNAG_01104	YDR083W	RRP8	SPAC56F8.09	rrp8	orf19.3630	ca1277	IPF10837	KOG3045	A	Predicted RNA methylase involved in rRNA processing	conserved hypothetical protein	Nucleolar protein involved in rRNA processing, pre-rRNA cleavage at site A2; also involved in telomere maintenance; mutation is synthetically lethal with a gar1 mutation	rRNA methyltransferase Rrp8 (predicted)	unknown function	None	None	None	None	None	None	None	None	-0.059	0.811	0.406	-0.411	-0.119	-0.098	0.01	0.041	-0.466	0.085	0.916	0.304	0.161	-0.663	0.039	-0.048	-0.58	-0.356
163.m06126	CNAG_01107	YPL175W	SPT14	SPBC3D6.07	gpi3	orf19.487	ca4518	SPT14	KOG1111	MOI	N-acetylglucosaminyltransferase complex, subunit PIG-A/SPT14, required for phosphatidylinositol biosynthesis/Sulfolipid synthase	transferase	UDP-GlcNAc-binding and catalytic subunit of the enzyme that mediates the first step in glycosylphosphatidylinositol (GPI) biosynthesis, mutations cause defects in transcription and in biogenesis of cell wall proteins	pig-A	N-acetylglucosaminyl-phosphatidylinositol biosynthetic protein (by homology)	None	None	None	None	None	None	None	None	0.168	0.765	0.315	-0.133	0.568	0.127	-0.061	-0.093	0.146	0.158	0.235	0.283	0.046	-0.569	-0.321	-0.049	-0.15	-0.199
163.m06127	CNAG_01109	None	None	None	None	None	None	None	None	None	None	conserved hypothetical protein	None	None	None	None	None	None	None	None	None	None	None	-0.067	-0.337	-0.204	-0.33	-0.444	-0.337	-0.2	-0.145	-0.877	0.152	0.892	-0.432	-0.224	-0.818	-0.542	-0.272	-0.818	-0.39
163.m06128	CNAG_01111	None	None	None	None	None	None	None	None	None	None	eukaryotic translation initiation factor 3 subunit 11	None	None	None	None	None	None	None	None	Cne_OxR-dw_2.0	None	Cne_OxSR-dw_2.0	0.12	0.793	0.307	-0.008	0.177	-0.082	0.359	0.006	0.09	-0.085	0.039	0.143	0.201	0.351	-0.055	-0.001	0.487	0.162
163.m06130	CNAG_01115	YLR454W	FMP27	SPAC3H5.09c	None	orf19.3422	ca3756	IPF8884	KOG1910	S	Uncharacterized conserved protein	conserved hypothetical protein	Putative protein of unknown function; the authentic, non-tagged protein is detected in highly purified mitochondria in high-throughput studies	conserved fungal protein	unknown function	None	None	None	None	None	None	None	None	0.156	0.524	0.167	-0.227	0.832	0.024	0.016	0.044	0.139	0.154	0.214	0.149	0.121	-0.496	-0.218	0.03	-0.155	-0.22
163.m06132	CNAG_01117	YNL014W	HEF3	SPCC417.08	tef3	orf19.4152	ca3081	EFT3	KOG0062	EJ	ATPase component of ABC transporters with duplicated ATPase domains/Translation elongation factor EF-3b	elongation factor 3	Translational elongation factor EF-3; paralog of YEF3 and member of the ABC superfamily; stimulates EF-1 alpha-dependent binding of aminoacyl-tRNA by the ribosome; normally expressed in zinc deficient cells	translation elongation factor eEF3	translation elongation factor 3	None	None	None	None	Cne_OxR-up_2.0	None	Cne_OxSR-up_2.0	None	0.138	-0.037	-0.328	-0.141	0.405	-0.065	-0.108	0.249	-0.12	0.217	0.597	-0.331	-0.28	0.223	-0.5	-0.283	-0.25	0.189
163.m06133	CNAG_01395	YOR095C	RKI1	SPAC144.12	None	orf19.1701	ca1503	RKI1	KOG3075	G	Ribose 5-phosphate isomerase	ribose-5-phosphate isomerase	Ribose-5-phosphate ketol-isomerase, catalyzes the interconversion of ribose 5-phosphate and ribulose 5-phosphate in the pentose phosphate pathway; participates in pyridoxine biosynthesis	ribose 5-phosphate isomerase (predicted)	D-ribose-5-phosphate ketol-isomerase (by homology)	None	None	None	None	None	Cne_OxR-dw_2.0	None	Cne_OxSR-dw_2.0	0.398	0.652	0.41	-0.058	0.138	-0.099	0.206	-0.069	-0.128	-0.067	0.032	0.398	-0.077	0.235	-0.314	-0.107	0.257	0.175
163.m06134	CNAG_01398	YJL050W	MTR4	SPAC6F12.16c	mtr4	orf19.1335	ca2119	MTR4	KOG0948	A	Nuclear exosomal RNA helicase MTR4, DEAD-box superfamily	ATP-dependent RNA helicase DOB1	Dead-box family ATP dependent helicase required for mRNA export from the nucleus; co-factor of the exosome complex, required for 3' end formation of 5.8S rRNA	ATP-dependent RNA helicase, TRAMP complex subunit Mtr4	RNA Helicase (by homology)	None	None	None	None	None	Cne_OxR-dw_2.0	None	Cne_OxSR-dw_2.0	-0.055	1.068	0.653	-0.258	0.666	0.186	0.324	0.285	-0.341	0.315	0.557	0.476	0.358	0.718	0.199	0.336	-0.131	0.31
163.m06136	CNAG_01397	YNR017W	TIM23	SPCC16A11.09c	tim23	orf19.1361	ca3130	TIM23	KOG3324	U	Mitochondrial import inner membrane translocase, subunit TIM23	mitochondrial import inner membrane translocase subunit	Essential protein of the mitochondrial inner membrane, component of the mitochondrial import system	TIM23 translocase complex subunit Tim23	mitochondrial inner membrane import translocase subunit (by homology)	None	None	None	None	None	Cne_OxR-dw_2.0	None	Cne_OxSR-dw_2.0	0.116	0.714	0.319	-0.407	-0.183	-0.07	-0.101	0.003	-0.274	0.1	0.768	0.196	-0.022	-0.465	-0.129	-0.131	-0.669	-0.206
163.m06137	CNAG_01396	YBR111W-A	SUS1	None	None	None	None	None	KOG4479	K	Transcription factor e(y)2	hypothetical protein	Protein involved in mRNA export coupled transcription activation; component of the SAGA histone acetylase complex	None	None	None	None	None	None	None	None	None	None	0.046	0.85	0.091	-0.031	0.422	0.125	0.308	0.117	0.014	-0.027	0.002	0.056	0.233	0.314	-0.033	0.15	0.469	0.175
163.m06138	CNAG_01392	None	None	None	None	None	None	None	None	None	None	conserved hypothetical protein	None	None	None	None	None	None	None	None	None	None	None	-0.19	1.189	0.413	-0.312	0.557	0.183	-0.164	-0.158	0.322	0.137	0.191	0.237	0.109	0.053	-0.209	-0.098	0.329	-0.255
163.m06139	CNAG_01390	YML022W	APT1	SPAC23A1.03	apt1	orf19.1448	ca4551	APT1	KOG1712	F	Adenine phosphoribosyl transferases	adenine phosphoribosyltransferase	Adenine phosphoribosyltransferase, catalyzes the formation of AMP from adenine and 5-phosphoribosylpyrophosphate; involved in the salvage pathway of purine nucleotide biosynthesis	adenine phosphoribosyltransferase (APRT) (predicted)	adenine phosphoribosyltransferase	None	None	None	Cne_FxR-dw_2.0	None	Cne_OxR-dw_2.0	None	None	-0.043	0.441	0.19	-0.475	0.403	-0.144	0.056	0.049	0.005	0.022	0.08	0.11	-0.09	-0.112	-0.424	-0.191	-0.269	-0.162
163.m06140	CNAG_01388	None	None	None	None	None	None	None	KOG1217	T	Fibrillins and related proteins containing Ca2+-binding EGF-like domains	conserved hypothetical protein	None	None	None	None	None	None	None	None	None	None	None	-0.109	1.221	0.384	-0.162	0.2	0.412	0.214	0.366	-0.045	0.296	0.634	0.389	0.35	0.823	0.289	0.283	-0.015	0.358
163.m06141	CNAG_01387	None	None	None	None	None	None	None	None	None	None	conserved hypothetical protein	None	None	None	None	None	None	None	None	None	None	None	-0.039	0.99	0.241	-0.319	0.475	0.287	-0.174	-0.043	-0.048	0.13	0.201	0.09	0.116	0.04	-0.095	-0.054	0.283	-0.178
163.m06142	CNAG_01385	None	None	None	None	None	None	None	KOG2287	G	Galactosyltransferases	conserved hypothetical protein	None	None	None	None	None	None	None	Cne_OxR-up_2.0	None	Cne_OxSR-up_2.0	None	-0.088	0.77	0.015	-0.487	0.541	-0.204	0.143	-0.025	0.193	0.037	0.109	0.004	0.16	-0.143	-0.396	-0.111	-0.384	-0.151
163.m06143	CNAG_01384	None	None	None	None	None	None	None	KOG2533	G	Permease of the major facilitator superfamily	bodown198	None	None	None	None	Cne_OsR-dw_2.0	None	Cne_FxR-dw_2.0	None	Cne_OxR-dw_2.0	None	Cne_CSR-dw_2.0	-0.112	0.848	-0.16	-0.334	0.339	0.115	-0.27	-0.123	0.006	0.161	0.187	-0.145	-0.066	-0.052	-0.322	-0.183	-0.077	-0.053
163.m06148	CNAG_01106	YOR270C	VPH1	SPAC16E8.07c	vph1	orf19.6863	ca4466	VPH1	KOG2189	C	Vacuolar H+-ATPase V0 sector, subunit a	vacuolar (H+)-ATPase subunit	Subunit a of vacuolar-ATPase V0 domain, one of two isoforms (Vph1p and Stv1p); Vph1p is located in V-ATPase complexes of the vacuole while Stv1p is located in V-ATPase complexes of the Golgi and endosomes	V-type ATPase subunit a	H+-ATPase V0 domain subunit (by homology)	None	None	None	None	None	None	None	None	0.164	0.805	0.299	-0.491	0.509	0.019	0.269	0.113	-0.051	0.011	0.095	0.184	0.185	0.044	-0.037	-0.04	-0.333	-0.199
163.m06149	CNAG_01116	None	None	None	None	orf19.6838	ca4442	IPF3537	KOG1200	I	Mitochondrial/plastidial beta-ketoacyl-ACP reductase	beta-ketoacyl reductase	None	None	unknown function	None	None	None	None	None	None	None	None	-0.152	1.233	0.359	-0.307	0.595	0.129	-0.148	-0.059	0.247	0.114	0.182	0.166	0.051	0.047	-0.216	-0.127	0.362	-0.22
163.m06151	None	None	None	None	None	None	None	None	None	None	None	None	None	None	None	None	None	None	None	None	None	None	None	-0.009	0.757	0.363	-0.218	0.585	0.415	0.296	0.051	0.521	-0.033	0.012	0.375	0.575	0.344	-0.061	0.102	0.593	0.093
163.m06152	CNAG_01112	None	None	None	None	None	None	None	KOG0134	CR	NADH:flavin oxidoreductase/12-oxophytodienoate reductase	xenobiotic reductase	None	None	None	None	None	Cne_FxR-up_2.0	None	None	None	Cne_FxSR-up_2.0	None	0.183	0.338	0.114	-0.513	0.357	0.029	0.297	0.048	-0.012	0.016	0.227	-0.111	0.351	-0.099	-0.35	0.08	-0.498	-0.06
163.m06155	CNAG_01110	YOR265W	RBL2	None	None	orf19.1738.1	ca0436	RBL2	KOG3470	O	Beta-tubulin folding cofactor A	co-chaperone	Protein involved in microtubule morphogenesis, required for protection from excess free beta-tubulin; proposed to be involved the folding of beta-tubulin; similar to mouse beta-tubulin cofactor A	None	Beta-tubulin binding protein (by homology)	None	None	Cne_FxR-up_2.0	None	None	None	Cne_FxSR-up_2.0	None	0.073	0.643	-0.046	0.144	0.1	-0.483	0.409	0.76	-0.135	0.067	-0.051	-0.176	-0.004	0.5	-0.159	0.336	-0.051	0.236
163.m06156	CNAG_01108	YIR029W	DAL2	SPAC1F7.09c	None	orf19.2065	ca4832	DAL2	KOG4145	F	Allantoicase	allantoicase	Allantoicase, converts allantoate to urea and ureidoglycolate in the second step of allantoin degradation; expression sensitive to nitrogen catabolite repression and induced by allophanate, an intermediate in allantoin degradation	allantoicase (predicted)	Allantoinase	Cne_OsR-up_2.0	None	None	None	None	None	Cne_OsSR-up_2.0	None	-0.113	1.035	0.368	-0.284	0.565	0.065	-0.196	-0.077	0.144	0.132	0.187	0.213	0.095	0.031	-0.304	-0.131	0.206	-0.161
163.m06157	CNAG_01105	None	None	None	None	None	None	None	None	None	None	conserved hypothetical protein	None	None	None	None	None	None	None	None	None	None	None	-0.155	1.144	0.34	-0.527	0.603	0.092	0.201	-0.051	-0.369	-0.013	0.174	0.266	0.387	-0.124	-0.159	-0.046	-0.149	-0.169
163.m06159	CNAG_01103	YDL043C	PRP11	SPBC21C3.05	sap62	orf19.4724	ca1604	IPF13653	KOG0227	A	Splicing factor 3a, subunit 2	zinc finger protein Sap62	Subunit of the SF3a splicing factor complex, required for spliceosome assembly	zinc finger protein Sap62	unknown function	None	None	None	None	None	None	None	None	-0.13	0.979	-0.216	-0.325	0.169	0.048	-0.432	-0.178	-0.134	0.112	0.198	-0.144	-0.258	-0.228	-0.595	-0.445	-0.315	-0.396
163.m06160	CNAG_01094	None	None	SPBC146.05c	cwf25	None	None	None	KOG3869	S	Uncharacterized conserved protein	pre-mRNA-splicing factor CWC25	None	complexed with Cdc5 protein Cwf25	None	None	None	None	None	Cne_OxR-up_2.0	None	Cne_OxSR-up_2.0	None	-0.016	0.752	0.168	-0.483	0.368	0.033	0.264	-0.045	-0.271	0.059	0.237	0.139	0.294	-0.097	-0.123	0.026	-0.499	-0.254
163.m06161	CNAG_01091	None	None	SPBC215.12	cwf10	None	None	None	KOG0468	J	U5 snRNP-specific protein	116 kda u5 small nuclear ribonucleoprotein component	None	GTPase Cwf10 (predicted)	None	None	None	None	None	None	Cne_OxR-dw_2.0	None	Cne_OxSR-dw_2.0	0.164	0.844	0.335	-0.157	0.616	0.019	-0.105	-0.026	0.115	0.155	0.223	0.442	-0.117	-0.588	-0.061	-0.208	-0.121	-0.227
163.m06162	CNAG_01088	None	None	None	None	None	None	None	KOG4293	T	Predicted membrane protein, contains DoH and Cytochrome b-561/ferric reductase transmembrane domains	conserved hypothetical protein	None	None	None	None	None	None	None	None	None	None	None	-0.029	0.44	0.325	-0.461	0.318	-0.076	0.024	0.083	-0.106	0.135	0.933	-0.116	0.079	-0.47	-0.126	0.006	-0.49	-0.308
163.m06163	CNAG_01087	None	None	None	None	None	None	None	KOG4265	O	Predicted E3 ubiquitin ligase	conserved hypothetical protein	None	None	None	None	None	None	None	Cne_OxR-up_2.0	None	Cne_OxSR-up_2.0	None	0.053	0.674	0.231	-0.187	0.729	0.151	-0.006	0.051	0.224	0.178	0.248	-0.084	0.033	-0.526	-0.121	0.016	-0.169	-0.253
163.m06164	CNAG_01084	None	None	None	None	None	None	None	KOG0417	O	Ubiquitin-protein ligase	ubiquitin conjugating enzyme 4	None	None	None	None	None	None	None	Cne_OxR-up_2.0	None	Cne_OxSR-up_2.0	None	0.027	0.622	0.149	-0.309	-0.253	-0.127	0.062	0.13	-0.072	0.13	0.997	0.221	0.184	-0.432	-0.127	0.013	-0.378	-0.224
163.m06165	CNAG_01083	YDL147W	RPN5	SPAPB8E5.02c	rpn502	orf19.4032	ca4798	RPN5.3f	KOG1498	O	26S proteasome regulatory complex, subunit RPN5/PSMD12	26S proteasome non-ATPase regulatory subunit 12	Essential, non-ATPase regulatory subunit of the 26S proteasome lid, similar to mammalian p55 subunit and to another S. cerevisiae regulatory subunit, Rpn7p	19S proteasome regulatory subunit Rpn502	subunit of the regulatory particle of the proteasome, 3-prime end (by homology)	None	None	None	None	None	None	None	None	0.531	0.601	0.269	-0.204	0.441	-0.126	-0.097	0.036	-0.169	0.11	0.171	0.221	-0.013	-0.413	-0.295	-0.042	-0.282	-0.1
163.m06166	CNAG_01079	None	None	None	None	None	None	None	None	None	None	HpcH/HpaI aldolase/citrate lyase family protein	None	None	None	None	None	None	None	Cne_OxR-up_2.0	None	Cne_OxSR-up_2.0	None	0.005	0.723	0.407	-0.493	-0.433	-0.016	0.108	0.263	0.136	0.084	1	0.223	0.166	-0.568	-0.233	0.011	-0.523	-0.24
163.m06167	CNAG_01077	None	None	None	None	None	None	None	KOG2317	J	Putative translation initiation inhibitor UK114/IBM1	conserved hypothetical protein	None	None	None	None	None	None	None	None	None	None	None	0.181	1.33	0.571	-0.295	0.735	0.065	0.354	-0.205	-0.093	0.128	0.633	0.853	0.631	-0.261	0.757	0.191	0.609	0.227
163.m06168	CNAG_01075	None	None	None	None	orf19.742	ca2290	IPF16300	KOG2449	EG	Methylmalonate semialdehyde dehydrogenase	methylmalonate-semialdehyde dehydrogenase	None	None	putative aldehyde dehydrogenase (by homology)	None	None	None	None	None	None	None	None	0.08	0.613	0.226	-0.116	0.703	-0.179	-0.099	-0.036	0.231	0.144	0.251	0.16	-0.185	-0.604	-0.123	-0.128	-0.21	-0.26
163.m06169	CNAG_01074	None	None	None	None	None	None	None	KOG1303	E	Amino acid transporters	neutral amino acid transporter	None	None	None	None	None	None	None	None	None	None	None	-0.124	0.676	0.232	-0.441	-0.43	-0.079	0.09	0.243	-0.398	0.149	1.017	0.106	0.133	-0.614	-0.132	-0.087	-0.357	-0.231
163.m06170	CNAG_01069	None	None	None	None	None	None	None	None	None	None	conserved hypothetical protein	None	None	None	None	None	None	None	None	None	None	None	-0.043	1.191	0.644	-0.271	0.877	0.079	0.161	0.084	0.412	0.305	-0.003	0.498	0.482	0.375	0.011	-0.023	0.866	0.11
163.m06171	CNAG_07442	YDL046W	NPC2	SPAPB8E5.04c	None	orf19.3226	ca1492	IPF168	KOG4680	R	Uncharacterized conserved protein, contains ML domain	vacuolar protein	Functional homolog of human NPC2/He1, which is a cholesterol-binding protein whose deficiency causes Niemann-Pick type C2 disease involving retention of cholesterol in lysosomes	Niemann-Pick disease type C2 protein hE1 homolog	unknown function	None	None	None	None	Cne_OxR-up_2.0	None	Cne_OxSR-up_2.0	None	0.326	-0.181	-0.038	-0.04	0.231	-0.309	-0.147	0.047	-0.279	0.148	0.275	-0.272	-0.171	-0.44	-0.464	-0.078	-0.447	-0.212
163.m06172	CNAG_01065	None	None	None	None	None	None	None	None	None	None	conserved hypothetical protein	None	None	None	None	None	None	None	None	None	None	None	0.182	0.939	0.509	-0.246	0.768	0.032	0.174	-0.056	0.249	0.105	0.601	0.368	0.254	-0.39	0.243	0.164	0.416	0.234
163.m06173	CNAG_01063	YHR186C	KOG1	SPAC57A7.11	mip1	orf19.418	ca2125	IPF4893	KOG1517	D	Guanine nucleotide binding protein MIP1	WD-repeat protein mip1	Subunit of TORC1, a rapamycin-sensitive complex involved in growth control that contains Tor1p or Tor2p, Lst8p and Tco89p; contains four HEAT repeats and seven WD-40 repeats; may act as a scaffold protein to couple TOR and its effectors	WD repeat protein Mip1	unknown function	None	None	None	None	None	None	None	None	0.425	0.47	0.293	-0.406	0.025	-0.186	0.075	0.164	-0.093	0.073	0.953	0.099	0.128	-0.47	-0.138	-0.049	-0.545	-0.147
163.m06174	CNAG_01062	YOL045W	PSK2	SPAC1805.01c	ppk6	orf19.7451	ca5742	FUN31	KOG1152	T	Signal transduction serine/threonine kinase with PAS/PAC sensor domain	CAMK/CAMKL/PASK protein kinase	One of two (see also PSK1) PAS domain containing S/T protein kinases; regulates sugar flux and translation in response to an unknown metabolite by phosphorylating Ugp1p and Gsy2p (sugar flux) and Caf20p, Tif11p and Sro9p (translation)	serine/threonine protein kinase Ppk6	Serine/threonine kinase (by homology)	None	None	None	None	None	None	None	None	0.131	0.881	0.346	-0.174	0.415	0.015	0.093	0.143	0.037	0.157	0.18	0.475	0.193	-0.421	0.047	0.03	-0.219	-0.222
163.m06175	CNAG_01061	None	None	None	None	None	None	None	KOG0586	R	Serine/threonine protein kinase	serine/threonine protein kinase	None	None	None	None	None	None	Cne_FxR-dw_2.0	None	None	None	Cne_FxSR-dw_2.0	-0.157	0.994	0.395	-0.438	-0.681	0.003	0.081	0.115	0.111	0.068	1.095	0.185	0.144	-0.598	-0.098	0.086	-0.404	-0.219
163.m06176	CNAG_01059	YBR241C	None	None	None	None	None	None	KOG0569	G	Permease of the major facilitator superfamily	vacuolar membrane protein	None	None	None	Cne_OsR-up_2.0	None	Cne_FxR-up_2.0	None	None	None	None	None	0.327	0.439	0.188	-0.357	0.648	0.054	-0.066	0.044	0.315	0.273	0.02	0.087	0.078	0.252	-0.32	-0.047	0.116	0.211
163.m06177	CNAG_01057	None	None	SPAPB17E12.04c	csn2	orf19.1400	ca3172	IPF7676	KOG1464	OT	COP9 signalosome, subunit CSN2	endopeptidase	None	COP9/signalosome complex subunit Csn2	unknown function	None	None	None	None	None	None	None	None	-0.181	1.049	0.423	-0.228	0.587	0.24	0.248	0.428	0.243	0.19	0.325	0.174	0.242	0.662	-0.123	0.103	0.247	0.273
163.m06178	CNAG_01055	YCR098C	GIT1	SPBC1271.09	None	orf19.1980	ca1136	IFN2	KOG0252	P	Inorganic phosphate transporter	phospholipid transporter	Plasma membrane permease, mediates uptake of glycerophosphoinositol and glycerophosphocholine as sources of the nutrients inositol and phosphate; expression and transport rate are regulated by phosphate and inositol availability	glycerophosphodiester transporter	glycerophosphoinositol transporter (by homology)	Cne_OsR-up_2.0	None	None	None	None	None	Cne_OsSR-up_2.0	None	-0.206	0.598	-0.125	-0.312	0.648	0.076	0.158	0.009	0.076	-0.104	0.084	-0.159	0.284	-0.053	-0.371	0.016	0.267	0.241
163.m06180	CNAG_01118	None	None	None	None	None	None	None	KOG1286	E	Amino acid transporters	amino acid transporter	None	None	None	Cne_OsR-up_2.0	None	None	None	None	None	Cne_OsSR-up_2.0	None	0.078	1.334	0.796	-0.3	0.578	0.472	0.321	-0.105	-0.396	0.12	0.563	0.641	0.552	-0.411	0.657	0.19	0.468	0.384
163.m06181	CNAG_01119	YKR093W	PTR2	SPBC13A2.04c	None	orf19.2583	None	None	KOG1237	E	H+/oligopeptide symporter	peptide transporter	Integral membrane peptide transporter, mediates transport of di- and tri-peptides; conserved protein that contains 12 transmembrane domains; PTR2 expression is regulated by the N-end rule pathway via repression by Cup9p	PTR family peptide transporter	None	Cne_OsR-up_2.0	None	None	None	None	None	Cne_OsSR-up_2.0	None	0.006	0.847	0.292	-0.182	0.585	0.013	0.081	0.032	0.254	0.298	0.006	-0.024	0.037	0.326	-0.327	-0.041	0.418	0.049
163.m06182	CNAG_01120	YNL071W	LAT1	SPCC794.07	None	orf19.6561	ca4875	LAT1	KOG0557	C	Dihydrolipoamide acetyltransferase	dihydrolipoyllysine-residue acetyltransferase	Dihydrolipoamide acetyltransferase component (E2) of pyruvate dehydrogenase complex, which catalyzes the oxidative decarboxylation of pyruvate to acetyl-CoA	dihydrolipoamide S-acetyltransferase E2 (predicted)	Dihydrolipoamide S-acetyltransferase (by homology)	None	None	None	Cne_FxR-dw_2.0	None	Cne_OxR-dw_2.0	None	None	-0.08	0.914	0.27	-0.191	0.203	0.075	-0.034	0.185	0.21	0.245	0.187	0.243	0.042	0.491	-0.195	-0.15	0.09	0.196
163.m06183	CNAG_01121	None	None	None	None	None	None	None	KOG3644	T	Ligand-gated ion channel	conserved hypothetical protein	None	None	None	None	None	None	None	None	None	None	None	0.078	0.663	0.077	-0.276	0.546	-0.297	0.202	0.196	-0.192	0.136	0.675	-0.145	-0.271	-0.476	-0.649	-0.167	-0.032	0.121
163.m06184	CNAG_01126	YDR170C	SEC7	SPAC30.01c	sec72	orf19.5947	ca6108	SEC7	KOG0929	U	Guanine nucleotide exchange factor	guanine nucleotide exchange protein for ADP-robosylation factor	Guanine nucleotide exchange factor (GEF) for ADP ribosylation factors involved in proliferation of the Golgi, intra-Golgi transport and ER-to-Golgi transport; found in the cytoplasm and on Golgi-associated coated vesicles	Sec7 domain	Guanine nucleotide exchange protein for ADP-robosylation factor (by homology)	None	None	None	None	None	None	None	None	-0.132	0.879	0.21	-0.194	0.781	0.181	0.225	0.082	0.038	-0.136	0.107	0.187	0.234	0.068	-0.051	0.012	0.436	0.189
163.m06185	None	None	None	None	None	None	None	None	None	None	None	None	None	None	None	None	None	Cne_FxR-up_2.0	None	None	None	Cne_FxSR-up_2.0	None	0.321	0.98	0.304	-0.371	0.715	0.286	0.09	0.197	0.408	0.313	-0.025	0.061	0.276	0.296	-0.021	0.004	0.359	0.065
163.m06186	CNAG_01128	YDR272W	GLO2	SPAC824.07	None	orf19.4088	ca4332	GLO2	KOG0813	R	Glyoxylase	hydroxyacylglutathione hydrolase	Cytoplasmic glyoxalase II, catalyzes the hydrolysis of S-D-lactoylglutathione into glutathione and D-lactate	hydroxyacylglutathione hydrolase (predicted)	Glyoxalase II (hydroxyacylglutathione hydrolase) (by homology)	None	None	Cne_FxR-up_2.0	None	None	None	Cne_FxSR-up_2.0	None	-0.152	0.867	0.247	-0.304	0.519	0.026	0.115	0.048	0.269	0.296	0.315	0.131	0.302	0.538	-0.169	0.1	-0.034	0.318
163.m06187	CNAG_01129	YHR072W	ERG7	SPAC13G7.01c	erg7	orf19.1570	ca3994	ERG7	KOG0497	I	Oxidosqualene-lanosterol cyclase and related proteins	lanosterol synthase	Lanosterol synthase, an essential enzyme that catalyzes the cyclization of squalene 2,3-epoxide, a step in ergosterol biosynthesis	lanosterol synthase Erg7 (predicted)	lanosterol synthase	None	None	None	None	None	None	None	None	0.302	1.058	0.393	-0.327	0.753	0.189	0.339	-0.016	-0.019	0.139	0.58	0.393	0.187	-0.408	0.136	0.065	0.195	0.326
163.m06188	CNAG_01130	None	None	None	None	None	None	None	KOG0504	R	FOG: Ankyrin repeat	conserved hypothetical protein	None	None	None	Cne_OsR-up_2.0	None	None	None	None	Cne_OxR-dw_2.0	Cne_OsSR-up_2.0	Cne_OxSR-dw_2.0	-0.147	1.138	0.374	-0.289	0.767	0.146	0.169	0.025	0.246	-0.102	0.097	0.383	0.339	-0.008	-0.227	-0.006	0.35	0.056
163.m06189	CNAG_01131	None	None	None	None	None	None	None	None	None	None	conserved hypothetical protein	None	None	None	None	None	None	None	None	None	None	None	0.132	0.262	-0.062	-0.166	0.26	0.075	0.041	0.256	-0.395	0.312	-0.004	-0.139	-0.308	0.195	-0.191	-0.136	0.076	0.121
163.m06190	None	None	None	None	None	None	None	None	None	None	None	None	None	None	None	None	None	None	None	None	None	None	None	0.069	1.343	0.74	-0.236	0.011	0.263	0.314	0.438	-0.57	0.204	0.771	0.586	0.908	0.148	2.464	0.631	-0.103	0.251
163.m06191	CNAG_01134	None	None	None	None	None	None	None	KOG3695	S	Uncharacterized conserved protein	conserved hypothetical protein	None	None	None	None	None	None	None	None	None	None	None	0.051	1.22	0.692	-0.343	0.6	0.241	0.288	-0.1	-0.126	0.134	0.712	0.335	0.188	-0.539	0.214	-0.02	-0.252	0.246
163.m06192	CNAG_01135	None	None	None	None	orf19.6830	ca5879	IPF12076	None	None	None	enoyl-CoA hydratase/isomerase family protein	None	None	enoyl CoA hydratase (by homology)	None	None	None	None	Cne_OxR-up_2.0	None	Cne_OxSR-up_2.0	None	0.201	0.665	0.616	-0.233	0.857	0.243	0.443	0.762	0.836	0.323	0.016	0.472	0.275	0.453	0.31	0.38	0.534	0.33
163.m06193	None	None	None	None	None	None	None	None	None	None	None	None	None	None	None	None	None	None	None	None	None	None	None	-0.02	1.454	0.814	-0.356	0.975	0.179	0.161	0.079	0.637	0.245	0.013	0.495	0.298	0.222	0.193	0.035	0.845	-0.009
163.m06194	CNAG_01169	YHR113W	None	SPAC4F10.02	None	orf19.2335	ca3336	IPF19983	KOG2596	E	Aminopeptidase I zinc metalloprotease (M18)	aminopeptidase	None	aminopeptidase (predicted)	unknown function	None	None	None	None	None	None	None	None	-0.141	0.983	0.409	-0.26	0.513	0.081	0.18	-0.111	0.418	0.325	0.404	0.217	0.286	0.62	-0.093	0.13	0.235	0.42
163.m06195	CNAG_01167	YJL074C	SMC3	SPAC10F6.09c	psm3	orf19.262	ca0846	SMC3.5f	KOG0964	D	Structural maintenance of chromosome protein 3 (sister chromatid cohesion complex Cohesin, subunit SMC3)	chromosome associated protein	Subunit of the multiprotein cohesin complex required for sister chromatid cohesion in mitotic cells; also required, with Rec8p, for cohesion and recombination during meiosis; phylogenetically conserved SMC chromosomal ATPase family member	mitotic cohesin complex subunit Psm3	required for structural maintenance of chromosomes, 5-prime end (by homology)	Cne_OsR-up_2.0	None	None	None	None	None	Cne_OsSR-up_2.0	None	-0.232	1.201	0.238	-0.287	0.842	0.36	0.24	0.007	0.076	-0.126	0.092	0.494	0.339	-0.082	-0.212	0.024	0.545	-0.029
163.m06196	CNAG_01165	YOR171C	LCB4	SPAC4A8.07c	None	orf19.5257	ca4991	LCB4	KOG1116	IT	Sphingosine kinase, involved in sphingolipid metabolism	D-erythro-sphingosine kinase	Sphingoid long-chain base kinase, responsible for synthesis of long-chain base phosphates, which function as signaling molecules, regulates synthesis of ceramide from exogenous long-chain bases, localizes to the Golgi and late endosomes	sphingoid long chain base (LCB) kinase	Sphingolipid long chain base kinase (by homology)	None	None	None	None	None	None	None	None	-0.178	1.15	0.217	-0.263	0.625	0.271	0.129	0.084	0.345	0.263	0.307	0.204	0.191	0.641	-0.181	0.029	0.407	0.347
163.m06197	CNAG_01163	YGL163C	RAD54	SPAC15A10.03c	rhp54	orf19.5004	ca5260	RAD54	KOG0390	L	DNA repair protein, SNF2 family	DNA supercoiling	DNA-dependent ATPase, stimulates strand exchange by modifying the topology of double-stranded DNA; involved in the recombinational repair of double-strand breaks in DNA during vegetative growth and meiosis; member of the SWI/SNF family	Rad54 homolog Rhp54	DNA-dependent ATPase of the Snf2p family (by homology)	None	None	None	None	Cne_OxR-up_2.0	None	Cne_OxSR-up_2.0	None	-0.28	0.845	0.056	-0.325	0.567	0.065	0.148	-0.019	0.114	-0.132	0.089	-0.007	0.12	-0.099	-0.518	-0.067	0.246	-0.048
163.m06198	CNAG_01159	None	None	SPBC365.05c	slu7	None	None	None	KOG2560	A	RNA splicing factor - Slu7p	pre-mRNA-splicing factor SLU7	None	splicing factor Slu7	None	None	None	None	None	None	None	None	None	-0.259	0.966	0.364	-0.195	0.597	0.216	0.076	-0.022	0.465	0.318	0.321	0.283	0.263	0.664	-0.163	-0.013	0.385	0.206
163.m06199	CNAG_01161	YIR030C	DCG1	SPAC1F7.10	None	orf19.244	ca0390	DCG1	None	None	None	conserved hypothetical protein	Protein of unknown function, expression is sensitive to nitrogen catabolite repression and regulated by Dal80p; contains transmembrane domain	hydantoin racemase family (predicted)	involved in nitrogen-catabolite metabolism (by homology)	None	None	None	None	None	Cne_OxR-dw_2.0	None	Cne_OxSR-dw_2.0	-0.135	0.906	0.026	-0.232	0.582	0.288	0.248	0.036	-0.014	-0.123	0.019	0.212	0.309	0.038	-0.179	0.016	0.197	0.038
163.m06200	CNAG_01155	YHL032C	GUT1	None	None	orf19.558	ca0929	GUT1	KOG2517	G	Ribulose kinase and related carbohydrate kinases	glycerol kinase	Glycerol kinase, converts glycerol to glycerol-3-phosphate; glucose repression of expression is mediated by Adr1p and Ino2p-Ino4p; derepression of expression on non-fermentable carbon sources is mediated by Opi1p and Rsf1p	None	Glycerol kinase (by homology)	None	None	None	None	None	None	None	None	0.208	0.278	0.178	-0.43	0.729	0.445	0.059	-0.3	0.358	0.098	0.564	-0.068	0.096	-0.331	-0.356	0.124	-0.099	0.312
163.m06202	CNAG_01152	YPL090C	RPS6A	SPAPB1E7.12	rps602	orf19.4660	ca2708	RPS6A	KOG1646	J	40S ribosomal protein S6	40s ribosomal protein s6-b	Protein component of the small (40S) ribosomal subunit; identical to Rps6Bp and has similarity to rat S6 ribosomal protein	40S ribosomal protein S6	ribosomal protein S6 (by homology)	None	None	None	None	None	Cne_OxR-dw_2.0	None	Cne_OxSR-dw_2.0	0.629	0.774	0.211	-0.111	-0.038	-0.14	-0.207	-0.236	-0.268	0.159	0.003	0.178	-0.321	0.183	-0.037	-0.258	-0.175	-0.027
163.m06204	CNAG_01150	None	None	None	None	orf19.118	ca0482	IPF14763	None	None	None	delta-12 fatty acid desaturase	None	None	delta-12 fatty acid desaturase (by homology)	None	None	None	None	Cne_OxR-up_2.0	None	Cne_OxSR-up_2.0	None	0.259	-0.311	-0.127	-0.57	0.871	0.373	0.253	-0.174	0.11	0.176	0.624	-0.165	-0.005	-0.511	-0.612	-0.114	-0.353	0.282
163.m06205	CNAG_01147	YKL013C	ARC19	SPAC6G9.07c	arc4	orf19.3251	ca5448	ARC19.3f	KOG1876	Z	Actin-related protein Arp2/3 complex, subunit ARPC4	ARP2/3 complex 20 kDa subunit	Subunit of the ARP2/3 complex, which is required for the motility and integrity of cortical actin patches	ARP2/3 actin-organizing complex subunit Arc4	subunit of the Arp2/3 complex involved in the control of actin polymerization, exon 2 (by homology)	None	None	None	None	None	None	None	None	0.234	0.751	0.209	-0.329	0.208	0.179	-0.064	-0.158	0.09	0.159	0.023	0.126	-0.037	0.147	-0.05	-0.019	0.001	-0.072
163.m06206	CNAG_01145	None	None	None	None	None	None	None	None	None	None	conserved hypothetical protein	None	None	None	None	None	None	None	None	None	None	None	-0.06	1.218	0.662	-0.347	0.745	0.233	-0.022	-0.411	0.33	0.134	0.475	0.249	0.089	-0.426	0.057	-0.036	0.426	-0.14
163.m06207	CNAG_01143	None	None	SPAC16A10.06c	nse2	orf19.7413	ca5712	IPF2657	KOG2979	R	Protein involved in DNA repair	conserved hypothetical protein	None	Smc5-6 complex non-SMC subunit 2	unknown function	None	None	None	None	None	None	None	None	-0.216	0.912	0.177	-0.257	0.33	-0.093	-0.168	-0.157	0.108	0.204	0.056	0.117	-0.06	0.199	-0.336	-0.204	-0.036	-0.253
163.m06208	CNAG_01140	YLL008W	DRS1	SPAC30D11.03	drs1	orf19.7635	ca6029	DRS1	KOG0338	A	ATP-dependent RNA helicase	ATP-dependent RNA helicase DRS1	Nucleolar DEAD-box protein required for ribosome assembly and function, including synthesis of 60S ribosomal subunits; constituent of 66S pre-ribosomal particles	ATP-dependent RNA helicase Drs1 (predicted)	ATP dependent RNA helicase (by homology)	None	None	None	None	None	None	None	None	-0.098	1.169	0.648	-0.301	0.649	0.101	-0.008	-0.432	0.249	0.156	0.534	0.264	0.197	-0.394	0.008	-0.074	0.411	-0.238
163.m06210	CNAG_01138	YKR066C	CCP1	None	None	orf19.238	None	None	None	None	None	cytochrome c peroxidase	Mitochondrial cytochrome-c peroxidase; degrades reactive oxygen species in mitochondria, involved in the response to oxidative stress	None	None	None	None	None	Cne_FxR-dw_2.0	Cne_OxR-up_2.0	None	Cne_OxSR-up_2.0	Cne_FxSR-dw_2.0	-0.116	0.966	0.434	-0.433	0.807	0.253	0.055	-0.283	0.405	0.123	0.05	0.165	0.136	0.148	-0.353	-0.076	0.049	-0.165
163.m06211	CNAG_01137	YLR304C	ACO1	SPAC24C9.06c	None	orf19.6385	ca3546	ACO1	KOG0453	CE	Aconitase/homoaconitase (aconitase superfamily)	aconitase	Aconitase, required for the tricarboxylic acid (TCA) cycle and also independently required for mitochondrial genome maintenance; phosphorylated; component of the mitochondrial nucleoid; mutation leads to glutamate auxotrophy	aconitate hydratase	aconitate hydratase (by homology)	None	None	None	None	Cne_OxR-up_2.0	None	Cne_OxSR-up_2.0	None	0.29	0.843	0.594	-0.275	0.394	-0.553	0	-0.377	-0.37	0.044	0.071	0.339	-0.002	-0.564	-1.074	-0.104	-0.077	0.018
163.m06213	CNAG_07440	YOR269W	PAC1	None	None	orf19.5410	ca5768	PAC1	KOG0295	S	WD40 repeat-containing protein	nuclear migration protein nudF	Protein involved in nuclear migration, part of the dynein/dynactin pathway; targets dynein to microtubule tips, which is necessary for sliding of microtubules along bud cortex; synthetic lethal with bni1; homolog of human LIS1	None	Similarity to human LIS-1 protein (by homomology)	None	None	None	None	Cne_OxR-up_2.0	None	Cne_OxSR-up_2.0	None	0.191	0.635	0.294	-0.184	0.192	0.092	0.086	0.17	-0.363	0.155	0.468	0.244	-0.004	0.559	-0.076	0.083	-0.043	0.205
163.m06215	CNAG_01133	YGL085W	None	SPBC19F8.04c	None	orf19.5014	ca5248	IPF1828	None	None	None	mitochondrial protein	None	nuclease	unknown function	None	None	None	None	None	None	None	None	-0.167	1.062	0.131	-0.321	0.229	0.067	-0.089	-0.283	0.178	0.149	0.048	0.186	-0.014	0.109	-0.189	-0.174	-0.068	-0.179
163.m06216	CNAG_01132	YDL213C	NOP6	SPBC365.04c	None	orf19.6236	ca3006	IPF12152	KOG0118	R	FOG: RRM domain	conserved hypothetical protein	Putative RNA-binding protein implicated in ribosome biogenesis; contains an RNA recognition motif (RRM) and has similarity to hydrophilins; NOP6 may be a fungal-specific gene as no homologs have been yet identified in higher eukaryotes	RNA-binding protein	unknown function	None	None	None	None	None	None	None	None	-0.072	1.2	0.417	-0.337	0.416	0.299	0.02	-0.335	-0.124	0.116	0.5	0.283	0.14	-0.521	0.138	-0.039	0.075	-0.014
163.m06217	CNAG_01125	None	None	None	None	None	None	None	None	None	None	conserved hypothetical protein	None	None	None	None	None	None	None	None	None	None	None	-0.05	0.512	-0.093	-0.309	0.469	-0.05	-0.073	-0.178	0.278	0.181	0.036	-0.21	-0.126	0.128	-0.309	-0.146	-0.048	-0.089
163.m06218	CNAG_01123	YDL036C	PUS9	SPAC18B11.02c	None	orf19.3177	ca2531	RIB2	KOG1919	A	RNA pseudouridylate synthases	DRAP deaminase	Mitochondrial tRNA pseudouridine synthase involved in pseudouridylation of mitochondrial tRNAs at position 32	pseudouridylate synthase (predicted)	DRAP deaminase (by homology)	None	None	None	None	None	None	None	None	-0.249	1.195	0.539	-0.309	0.899	0.379	0.06	-0.024	0.532	0.338	0.285	0.267	0.357	0.605	-0.009	0	0.646	0.106
163.m06219	CNAG_01399	None	None	None	None	None	None	None	KOG2277	D	S-M checkpoint control protein CID1 and related nucleotidyltransferases	conserved hypothetical protein	None	None	None	None	None	None	None	None	None	None	None	-0.091	0.556	0.059	-0.332	0.595	0.114	-0.023	-0.056	0.033	-0.108	0.048	0.113	0.027	-0.022	-0.382	-0.12	0.126	0.043
163.m06220	CNAG_01382	YMR293C	LRC6	SPBC646.03	None	orf19.3956	ca1015	IPF15547	KOG1211	J	Amidases	glutamyl-tRNA(Gln) amidotransferase subunit A	Putative protein similar to bacterial glutamyl-tRNA amidotransferases; non-tagged protein is detected in purified mitochondria; null mutant displays decreased frequency of mitochondrial genome loss (petite formation)	glutamyl-tRNA amidotransferase	putative glutamyl-tRNA amidotransferase subunit A (by homology)	None	None	None	None	Cne_OxR-up_2.0	None	Cne_OxSR-up_2.0	None	-0.234	1.087	0.342	-0.373	0.528	0.206	0.054	-0.042	0.358	0.199	0.259	0.203	0.176	0.615	-0.203	0.005	0.623	0.083
163.m06221	CNAG_01380	None	None	None	None	None	None	None	KOG2419	I	Phosphatidylserine decarboxylase	conserved hypothetical protein	None	None	None	None	None	None	None	None	None	None	None	-0.106	0.913	0.214	-0.3	0.627	0.194	0.144	-0.165	0.34	-0.071	0.071	0.166	0.301	0.078	-0.209	0.006	0.477	0.02
163.m06222	CNAG_01378	YJR117W	STE24	SPAC3H1.05	None	orf19.5654	None	None	KOG2719	R	Metalloprotease	CaaX prenyl protease	Highly conserved zinc metalloprotease that functions in two steps of a-factor maturation, C-terminal CAAX proteolysis and the first step of N-terminal proteolytic processing; contains multiple transmembrane spans	CAAX prenyl protease (predicted)	None	None	None	None	None	None	None	None	None	-0.098	0.65	0.363	-0.224	0.321	0.025	-0.136	-0.065	0.041	0.146	0.319	0.055	-0.098	0.492	-0.39	-0.085	0.005	0.189
163.m06223	CNAG_01377	YGL094C	PAN2	SPAC22G7.04	ubp13	orf19.4764	ca2626	PAN2	KOG1275	L	PAB-dependent poly(A) ribonuclease, subunit PAN2	PAB-dependent poly(A)-specific ribonuclease subunit PAN2	Essential subunit of the Pan2p-Pan3p poly(A)-ribonuclease complex, which acts to control poly(A) tail length and regulate the stoichiometry and activity of postreplication repair complexes	ubiquitin C-terminal hydrolase, poly(A)-specific ribonuclease complex subunit Pan2 (predicted)	component of Pab1p-stimulated poly(A)(by homology)	None	None	None	None	None	None	None	None	-0.171	1.075	0.118	-0.265	0.608	0.12	0.121	-0.142	0.157	-0.117	0.027	0.169	0.182	0.015	-0.21	0.011	0.268	-0.061
163.m06224	CNAG_01376	YNL091W	NST1	SPAC29E6.10c	None	orf19.2208	ca1884	IPF5486	None	None	None	conserved hypothetical protein	Protein of unknown function, mediates sensitivity to salt stress; interacts physically with the splicing factor Msl1p and also displays genetic interaction with MSL1	kinetochore protein (predicted)	unknown function	None	None	None	None	None	None	None	None	-0.137	0.9	0.255	-0.259	0.524	0.039	0.054	0.151	0.366	0.13	0.409	0.127	0.067	0.475	-0.305	0.02	0.223	0.192
163.m06225	CNAG_07422	None	None	None	None	None	None	None	KOG1225	TW	Teneurin-1 and related extracellular matrix proteins, contain EGF-like repeats	delayed-type hypersensitivity antigen	None	None	None	None	None	None	None	None	None	None	None	-0.288	0.018	-0.997	-0.444	0.073	-0.226	-0.223	-0.318	-0.695	-0.076	0.062	-1.163	-0.416	-0.23	-0.416	-0.15	0.004	-0.192
163.m06226	CNAG_01372	YML034W	SRC1	SPAC18G6.10	None	orf19.5569	ca0439	SCRC1	None	None	None	conserved hypothetical protein	Inner nuclear membrane (INM) protein with a putative role in sister chromatid segregation, potentially phosphorylated by Cdc28p; contains helix-extension-helix (HEH) motif, nuclear localization signal sequence	chromosome segregation protein Heh1 (predicted)	unknown function	None	None	None	None	None	None	None	None	-0.164	0.989	0.61	-0.254	0.434	0.156	0.015	0.033	0.18	0.229	0.342	0.269	0.264	0.616	-0.275	0.026	0.365	0.254
163.m06230	CNAG_01364	YDR454C	GUK1	SPBC1198.05	None	orf19.1115	ca1808	GUK1	KOG0707	F	Guanylate kinase	guanylate kinase	Guanylate kinase, converts GMP to GDP; required for growth and mannose outer chain elongation of cell wall N-linked glycoproteins	guanylate kinase (predicted)	Guanylate kinase (by homology)	None	None	None	Cne_FxR-dw_2.0	None	None	None	Cne_FxSR-dw_2.0	-0.179	1.018	0.11	-0.366	0.623	0.082	0.18	-0.122	0.103	-0.089	0.041	0.309	0.269	0.03	-0.205	0.048	0.376	-0.183
163.m06231	CNAG_01361	YNL189W	SRP1	SPCC962.03c	cut15	orf19.5682	ca2605	SRP1	KOG0166	U	Karyopherin (importin) alpha	importin alpha subunit	Karyopherin alpha homolog, forms a dimer with karyopherin beta Kap95p to mediate import of nuclear proteins, binds the nuclear localization signal of the substrate during import; may also play a role in regulation of protein degradation	karyopherin Cut15	alpha importin by homology	None	None	None	None	None	None	None	None	-0.1	0.734	0.342	-0.32	0.29	-0.003	-0.055	-0.198	0.064	0.218	0.326	0.166	0.044	0.44	-0.26	-0.061	0.518	0.319
163.m06232	None	None	None	None	None	None	None	None	None	None	None	None	None	None	None	None	None	Cne_FxR-up_2.0	None	None	None	Cne_FxSR-up_2.0	None	-0.048	0.703	0.054	-0.297	0.411	-0.001	0.048	-0.216	-0.287	-0.056	0.079	0.152	-0.171	-0.066	-0.347	-0.064	-0.008	-0.248
163.m06234	CNAG_01356	None	None	None	None	None	None	None	None	None	None	conserved hypothetical protein	None	None	None	None	None	None	None	Cne_OxR-up_2.0	None	Cne_OxSR-up_2.0	None	-0.145	1.249	0.244	-0.034	0.704	0.555	0.335	0.103	0.559	-0.046	-0.106	0.281	0.546	0.424	0.131	0.029	0.951	0.072
163.m06236	CNAG_00890	None	None	None	None	None	None	None	None	None	None	conserved hypothetical protein	None	None	None	None	None	None	None	None	Cne_OxR-dw_2.0	None	Cne_OxSR-dw_2.0	-0.112	1.053	0.474	-0.318	0.608	0.291	-0.016	-0.358	0.221	0.127	0.454	0.195	0.057	-0.449	-0.068	-0.053	0.274	0.052
163.m06237	CNAG_01400	YBR249C	ARO4	None	None	orf19.4060	ca1484	ARO4	None	None	None	3-deoxy-7-phosphoheptulonate synthase	3-deoxy-D-arabino-heptulosonate-7-phosphate (DAHP) synthase, catalyzes the first step in aromatic amino acid biosynthesis and is feedback-inhibited by tyrosine or high concentrations of phenylalanine or tryptophan	None	3-dehydro-deoxyphosphoheptonate aldolase, tyrosine-inhibited (by homology)	None	None	None	None	Cne_OxR-up_2.0	None	Cne_OxSR-up_2.0	None	0.456	-0.1	-0.581	-0.29	-0.045	-0.225	-0.676	-0.487	-0.482	0.075	0.154	-0.325	-0.541	-0.436	-0.195	-0.396	-0.651	0.097
163.m06238	CNAG_01402	YJR065C	ARP3	SPAC630.03	arp3	orf19.2289	ca1117	ARP3	KOG0678	Z	Actin-related protein Arp2/3 complex, subunit Arp3	actin binding protein	Essential component of the Arp2/3 complex, which is a highly conserved actin nucleation center required for the motility and integrity of actin patches; involved in endocytosis and membrane growth and polarity	actin-like protein Arp3	actin related protein (by homology)	None	None	None	None	None	None	None	None	0.146	0.545	0.378	-0.242	0.228	-0.068	-0.128	-0.274	0.009	0.089	0.353	0.094	-0.045	-0.434	-0.357	-0.085	-0.046	0.033
163.m06239	CNAG_01403	YAR002C-A	ERP1	SPBC16E9.09c	None	orf19.2322.3	ca3347	ERP5	KOG1690	U	emp24/gp25L/p24 family of membrane trafficking proteins	eclair-PA	Protein that forms a heterotrimeric complex with Erp2p, Emp24p, and Erv25p; member, along with Emp24p and Erv25p, of the p24 family involved in ER to Golgi transport and localized to COPII-coated vesicles	COPII vesicle coat component Erp5/Erp6	protein involved in membrane trafficking (by homology)	None	None	None	None	None	Cne_OxR-dw_2.0	None	Cne_OxSR-dw_2.0	0.079	0.814	0.174	-0.267	0.289	-0.064	-0.117	-0.251	0.095	0.197	0.029	-0.01	-0.037	0.105	-0.142	-0.138	-0.126	-0.089
163.m06240	CNAG_07418	YLR128W	DCN1	SPBC839.03c	None	orf19.6822	ca5886	IPF2417	KOG3077	S	Uncharacterized conserved protein	defective in Cullin neddylation protein 1	Putative Nedd8 ligase; binds Nedd8; involved in cullin neddylation; not essential; similar to C.elegans DCN-1; contains UBA-like ubiquitin-binding domain and a DUF298 domain	neddylation protein Dcn1	unknown function	None	None	None	None	None	None	None	None	-0.067	1.059	0.611	-0.284	0.633	0.101	0.074	-0.24	0.264	0.172	0.437	0.352	0.159	-0.483	-0.081	-0.094	0.265	0.042
163.m06241	CNAG_01414	YFR051C	RET2	SPCC285.08	ret2	orf19.4236	ca4136	RET2	KOG2635	U	Medium subunit of clathrin adaptor complex	ARCN1 protein	Delta subunit of the coatomer complex (COPI), which coats Golgi-derived transport vesicles; involved in retrograde transport between Golgi and ER	coatomer delta subunit Ret2 (predicted)	Coatomer complex delta chain (by homology)	None	None	None	None	None	None	None	None	0.112	0.677	0.129	-0.311	0.329	0.088	-0.149	-0.148	0.235	0.211	0.065	0.04	-0.094	0.091	-0.201	-0.096	-0.062	0.079
163.m06242	CNAG_01416	YOR021C	None	None	None	orf19.5783	ca2808	IPF11966	None	None	None	DUF431 domain-containing protein	None	None	unknown function	None	None	None	None	None	Cne_OxR-dw_2.0	None	Cne_OxSR-dw_2.0	-0.101	1.334	0.4	-0.173	0.735	0.374	0.218	0.254	-0.188	0.347	0.523	0.475	0.49	0.678	0.298	0.261	0.074	0.392
163.m06243	CNAG_01168	YLR175W	CBF5	SPAC29A4.04c	None	orf19.1833	ca2373	CBF5	KOG2529	J	Pseudouridine synthase	centromere/microtubule binding protein cbf5	Pseudouridine synthase catalytic subunit of box H/ACA small nucleolar ribonucleoprotein particles (snoRNPs), acts on both large and small rRNAs and on snRNA U2	pseudouridylate synthase (predicted)	centromere/ microtubule binding protein	Cne_OsR-up_2.0	None	None	None	None	Cne_OxR-dw_2.0	Cne_OsSR-up_2.0	Cne_OxSR-dw_2.0	0.057	1.167	0.698	-0.301	0.542	0.069	0.115	-0.346	0.116	0.164	0.369	0.413	0.094	-0.466	0.085	-0.028	0.229	-0.068
163.m06244	CNAG_01170	YML024W	RPS17A	SPBC839.05c	rps1701	orf19.2329.1	ca3341	RPS17	KOG0187	J	40S ribosomal protein S17	conserved hypothetical protein	Ribosomal protein 51 (rp51) of the small (40s) subunit; nearly identical to Rps17Bp and has similarity to rat S17 ribosomal protein	40S ribosomal protein S17	Ribosomal protein S17 (by homology)	None	None	None	None	None	Cne_OxR-dw_2.0	None	Cne_OxSR-dw_2.0	0.779	0.65	0.361	-0.05	-0.166	-0.477	-0.308	-0.331	-0.385	0.173	-0.078	0.202	-0.414	0.149	-0.395	-0.283	-0.38	-0.128
163.m06245	CNAG_01172	None	None	None	None	None	None	None	None	None	None	conserved hypothetical protein	None	None	None	None	None	None	None	None	None	None	None	-0.046	0.268	0.18	-0.312	0.586	-0.047	-0.398	-0.12	-0.273	-0.103	0.044	0.099	-0.234	0.083	-0.356	-0.431	-0.165	0.079
163.m06246	CNAG_01175	YMR292W	GOT1	SPCC4B3.02c	None	orf19.3972	ca3397	IPF13618	KOG1743	P	Ferric reductase-like proteins	conserved hypothetical protein	Evolutionarily conserved non-essential protein present in early Golgi cisternae that may be involved in ER-Golgi transport at a step after vesicle tethering to Golgi membranes, exhibits membrane topology similar to that of Sft2p	Golgi transport protein Got1 (predicted)	unknown function	None	None	None	None	None	None	None	None	0.179	0.744	0.381	-0.207	0.035	-0.077	0.073	0.122	-0.331	0.262	0.46	0.259	0.018	0.603	-0.045	0.127	-0.379	0.255
163.m06247	CNAG_01178	None	None	None	None	None	None	None	None	None	None	nuclear envelope-endoplasmic reticulum network protein	None	None	None	None	None	None	None	Cne_OxR-up_2.0	None	Cne_OxSR-up_2.0	None	0.082	0.703	0.077	-0.078	0.595	0.173	0.041	0.132	-0.02	-0.028	0.023	-0.053	0.037	0.319	-0.21	-0.195	0.255	0.215
163.m06248	CNAG_01180	None	None	None	None	orf19.6219	ca2576	IPF7432	None	None	None	conserved hypothetical protein	None	None	unknown function	None	None	None	None	None	Cne_OxR-dw_2.0	None	Cne_OxSR-dw_2.0	-0.038	0.961	0.578	-0.136	0.697	0.356	0.168	0.046	-0.074	0.336	0.75	0.453	0.412	0.691	0.154	0.194	0.591	0.213
163.m06249	CNAG_01182	None	None	SPCC757.09c	rnc1	orf19.5627	ca2762	IPF15012	KOG2190	AR	PolyC-binding proteins alphaCP-1 and related KH domain proteins	cytoplasmic protein	None	RNA-binding protein that suppresses calcineurin deletion Rnc1	pre mRNA splicing factor (by homology)	None	None	None	None	None	None	None	None	0.344	0.379	0.207	-0.235	0.527	-0.009	0.093	0.148	0.168	-0.022	0.059	0.179	0.029	0.272	-0.064	-0.073	0.407	0.317
163.m06250	CNAG_01184	YNL011C	None	None	None	orf19.6905	ca4587	IPF2223	None	None	None	UPF0052 domain-containing protein	None	None	unknown function	None	Cne_OsR-dw_2.0	None	None	None	None	None	Cne_OsSR-dw_2.0	-0.04	0.933	0.358	-0.331	0.598	0.07	0.056	-0.322	0.285	0.119	0.45	0.124	0.04	-0.593	-0.093	-0.088	0.222	0.091
163.m06251	CNAG_01187	YKR081C	RPF2	SPAC926.08c	None	orf19.3553	ca2662	IPF17139	KOG3031	J	Protein required for biogenesis of the ribosomal 60S subunit	ribosome biogenesis protein RPF2	Essential protein involved in the processing of pre-rRNA and the assembly of the 60S ribosomal subunit; interacts with ribosomal protein L11; localizes predominantly to the nucleolus; constituent of 66S pre-ribosomal particles	Brix domain protein Rpf2 (predicted)	unknown function	Cne_OsR-up_2.0	None	None	None	None	None	Cne_OsSR-up_2.0	None	0.136	1.061	0.605	-0.285	0.465	0.508	0.212	0.137	-0.037	0.322	0.611	0.419	0.415	0.595	0.262	0.326	0.353	0.348
163.m06252	CNAG_01190	YLR268W	SEC22	SPBC2A9.08c	sec22	orf19.479.2	ca4525	SEC22	KOG0862	U	Synaptobrevin/VAMP-like protein SEC22	protein transport protein SEC22	R-SNARE protein; assembles into SNARE complex with Bet1p, Bos1p and Sed5p; cycles between the ER and Golgi complex; involved in anterograde and retrograde transport between the ER and Golgi; synaptobrevin homolog	SNARE Sec22	synaptobrevin-type protein transport protein (by homology)	None	None	None	None	None	None	None	None	0.243	0.853	0.289	-0.017	0.382	0.283	0.291	0.084	-0.043	0.055	0.006	0.307	0.137	0.372	0.078	0.015	0.487	0.353
163.m06255	CNAG_01193	None	None	None	None	None	None	None	KOG1051	O	Chaperone HSP104 and related ATP-dependent Clp proteases	conserved hypothetical protein	None	None	None	None	None	None	None	None	None	None	None	-0.139	1.342	0.792	-0.208	0.21	0.365	0.104	0.054	-0.558	0.405	0.702	0.5	0.492	0.701	0.224	0.291	0.387	0.611
163.m06256	CNAG_01196	None	None	None	None	None	None	None	None	None	None	conserved hypothetical protein	None	None	None	None	None	None	None	None	None	None	None	0.206	1.045	0.193	-0.12	0.563	-0.038	0.3	0.127	0.031	0.01	0.039	0.185	0.126	0.441	-0.116	0.077	0.355	0.164
163.m06257	CNAG_01197	YMR235C	RNA1	SPAC22E12.07	rna1	orf19.1649	ca1044	RNA1	KOG1909	AYT	Ran GTPase-activating protein	ran GTPase activator	GTPase activating protein (GAP) for Gsp1p, involved in nuclear transport	Ran GAP Rna1	GTPase activating protein (by homology)	None	None	None	None	None	None	None	None	-0.031	0.996	0.318	-0.306	0.392	-0.074	-0.054	-0.211	0.173	0.197	0.044	0.31	-0.004	0.068	-0.288	-0.176	-0.063	-0.166
163.m06258	CNAG_01199	YJL041W	NSP1	SPAC26A3.15c	nsp1	orf19.900	ca4672	IPF3659	KOG2196	Y	Nuclear porin	conserved hypothetical protein	Essential component of the nuclear pore complex, which mediates nuclear import and export	nucleoporin Nsp1	similar to Saccharomyces cerevisiae Nsp1p nuclear pore protein (by homology)	None	None	None	None	None	None	None	None	-0.025	1.21	0.497	-0.236	0.518	0.011	0.099	-0.328	0.188	0.098	0.388	0.228	0.019	-0.566	0.014	0.007	0.16	-0.01
163.m06259	CNAG_01201	YDR397C	NCB2	SPBC30D10.02	None	orf19.5825	ca3794	NCB2	KOG0871	K	Class 2 transcription repressor NC2, beta subunit (Dr1)	conserved hypothetical protein	Subunit of a heterodimeric NC2 transcription regulator complex with Bur6p; complex binds to TBP and can repress transcription by preventing preinitiation complex assembly or stimulate activated transcription; homologous to human NC2beta	transcription corepressor (predicted)	Transcriptional repressor by homology	None	None	None	None	None	None	None	None	-0.17	1.019	0.338	-0.297	0.378	0.077	-0.045	-0.198	0.173	0.198	0.033	0.296	0.04	-0.003	-0.2	-0.088	-0.057	-0.276
163.m06260	CNAG_07435	YGL237C	HAP2	SPBC725.11c	php2	orf19.1228	ca0209	HAP2	KOG1561	K	CCAAT-binding factor, subunit B (HAP2)	transcription activator	Subunit of the heme-activated, glucose-repressed Hap2p/3p/4p/5p CCAAT-binding complex, a transcriptional activator and global regulator of respiratory gene expression; contains sequences sufficient for both complex assembly and DNA binding	CCAAT-binding factor complex subunit Php2	CCAAT-binding factor subunit (by homology)	None	None	None	None	Cne_OxR-up_2.0	None	Cne_OxSR-up_2.0	None	0.319	0.66	0.231	-0.282	0.625	-0.159	0.123	-0.009	-0.346	0.121	0.573	0.212	0.083	-0.516	-0.235	0.01	-0.161	0.156
163.m06261	CNAG_07434	None	None	None	None	None	None	None	KOG1605	K	TFIIF-interacting CTD phosphatase, including NLI-interacting factor (involved in RNA polymerase II regulation)	conserved hypothetical protein	None	None	None	None	None	None	None	None	None	None	None	0.055	1.082	0.424	-0.34	0.812	0.187	0.107	0.159	0.395	0.277	-0.042	0.512	0.283	0.188	0.116	0.052	0.593	-0.082
163.m06262	CNAG_01207	None	None	None	None	None	None	None	KOG3619	C	Adenylate/guanylate cyclase	conserved hypothetical protein	None	None	None	None	None	None	None	None	None	None	None	0.115	1.074	0.681	-0.254	0.864	0.201	0.325	-0.029	0.339	0.14	0.637	0.441	0.277	-0.559	0.05	0.159	0.275	0.439
163.m06263	CNAG_01208	YGR217W	CCH1	SPAC6F6.01	None	orf19.3298	ca4608	CCH1	KOG2301	PT	Voltage-gated Ca2+ channels, alpha1 subunits	high-affinity cell membrane calcium channel	Voltage-gated high-affinity calcium channel involved in calcium influx in response to some environmental stresses as well as exposure to mating pheromones; interacts and co-localizes with Mid1p, suggesting Cch1p and Mid1p function together	VIC ion channel (predicted)	Calcium channel protein (by homology)	None	None	None	None	None	None	None	None	0.215	0.606	0.297	-0.323	0.622	0.238	0.057	0.287	0.289	0.247	-0.031	0.248	-0.018	0.164	0.039	-0.063	0.299	0.051
163.m06264	CNAG_01204	YDR298C	ATP5	SPCC1840.06	atp5	orf19.5419	ca5775	ATP5	KOG1662	C	Mitochondrial F1F0-ATP synthase, subunit OSCP/ATP5	ATP synthase subunit 5	Subunit 5 of the stator stalk of mitochondrial F1F0 ATP synthase, which is an evolutionarily conserved enzyme complex required for ATP synthesis; homologous to bovine subunit OSCP (oligomycin sensitivity-conferring protein); phosphorylated	F0-ATPase delta subunit	F1F0-ATPase complex, OSCP subunit (by homology)	None	None	None	None	None	None	None	None	0.733	0.548	0.345	-0.218	0.392	-0.129	0.117	-0.086	-0.136	0.089	0.303	0.264	-0.124	-0.327	-0.187	0.002	-0.044	0.392
163.m06265	CNAG_01203	YIR026C	YVH1	SPBC17A3.06	None	orf19.4401	ca3902	YVH1	KOG1716	V	Dual specificity phosphatase	conserved hypothetical protein	Protein phosphatase involved in vegetative growth at low temperatures, sporulation, and glycogen accumulation; transcription induced by low temperature and nitrogen starvation; member of the dual-specificity family of protein phosphatases	phosphoprotein phosphatase (predicted)	protein tyrosine phosphatase (by homology)	None	None	None	None	None	None	None	None	-0.161	0.816	0.319	-0.246	0.548	0.145	-0.082	-0.033	0.142	0.191	0.347	0.075	0.03	0.437	-0.183	-0.088	0.373	0.234
163.m06266	CNAG_01202	None	None	None	None	None	None	None	None	None	None	conserved hypothetical protein	None	None	None	None	None	None	None	None	Cne_OxR-dw_2.0	None	Cne_OxSR-dw_2.0	-0.331	1.142	0.277	-0.38	0.796	0.214	0.204	-0.289	0.228	-0.071	0.033	0.383	0.361	0.059	-0.124	-0.04	0.46	-0.225
163.m06267	CNAG_01198	YPR182W	SMX3	SPBC3E7.14	smf1	orf19.4340.1	ca1342	IPF11347	KOG3482	A	Small nuclear ribonucleoprotein (snRNP) SMF	small nuclear riboprotein F	Core Sm protein Sm F; part of heteroheptameric complex (with Smb1p, Smd1p, Smd2p, Smd3p, Sme1p, and Smx2p) that is part of the spliceosomal U1, U2, U4, and U5 snRNPs; homolog of human Sm F	Sm snRNP core protein Smf1	unknown function	None	None	None	None	None	Cne_OxR-dw_2.0	None	Cne_OxSR-dw_2.0	-0.094	1.107	0.499	-0.229	0.461	0.176	0.017	0.06	0.1	0.163	0.269	0.258	0.172	0.518	-0.145	0.004	0.258	0.195
163.m06270	CNAG_01195	YOR291W	None	SPCC1672.11c	None	orf19.1573	ca0761	IPF8267	KOG0208	P	Cation transport ATPase	membrane protein	None	P-type ATPase (predicted)	P-type ATPase	None	None	None	None	None	None	None	None	-0.193	1.036	0.34	-0.37	0.776	0.242	0.133	-0.308	0.359	-0.019	0.043	0.344	0.31	0.137	-0.19	0.014	0.447	-0.152
163.m06271	CNAG_01191	None	None	None	None	orf19.1634	ca4002	IPF4258	KOG0817	I	Acyl-CoA-binding protein	long-chain fatty acid transporter	None	None	unknown function	None	None	Cne_FxR-up_2.0	None	None	None	Cne_FxSR-up_2.0	None	0.06	1.12	0.458	-0.349	0.696	0.3	0.155	0.214	0.36	0.247	0.032	0.445	0.285	0.134	0.161	-0.004	0.561	-0.113
163.m06272	CNAG_01189	YOR341W	RPA190	SPBC4C3.05c	nuc1	orf19.1839	ca2368	RPA190	KOG0262	K	RNA polymerase I, large subunit	RNA polymerase I largest subunit	RNA polymerase I subunit; largest subunit of RNA polymerase I	DNA-directed RNA polymerase I complex large subunit Nuc1	DNA-directed RNA polymerase I (by homology)	None	None	None	None	None	Cne_OxR-dw_2.0	None	Cne_OxSR-dw_2.0	-0.147	1.104	0.421	-0.378	0.587	0.162	0.116	0.086	0.215	0.19	0.348	0.205	0.167	0.501	-0.181	0.074	0.495	0.101
163.m06273	CNAG_01186	None	None	None	None	None	None	None	None	None	None	gp165	None	None	None	None	None	None	None	None	None	None	None	-0.173	0.958	0.029	-0.318	0.693	0.264	0.107	-0.156	0.279	-0.048	0.04	0.176	0.25	0.123	-0.072	-0.024	0.249	-0.073
163.m06275	CNAG_01183	None	None	SPBC19C2.10	None	orf19.2791	ca2000	IPF11796	KOG1118	IT	Lysophosphatidic acid acyltransferase endophilin/SH3GL, involved in synaptic vesicle formation	conserved hypothetical protein	None	BAR adaptor protein	unknown function	None	None	None	None	None	None	None	None	0.168	1.298	0.322	-0.277	0.641	0.314	0.177	0.039	-0.101	0.135	0.584	0.334	0.162	-0.685	0.296	-0.094	-0.085	0.008
163.m06276	CNAG_01181	YLR167W	RPS31	SPAC6G10.11c	ubi3	orf19.3087	ca2011	RPS31	KOG0004	J	Ubiquitin/40S ribosomal protein S27a fusion	ribosomal chaperone	Fusion protein that is cleaved to yield a ribosomal protein of the small (40S) subunit and ubiquitin; ubiquitin may facilitate assembly of the ribosomal protein into ribosomes; interacts genetically with translation factor eIF2B	ribosomal-ubiquitin fusion protein Ubi3	Ubiquitin fusion protein	None	None	None	None	None	None	None	None	0.342	0.701	0.189	-0.104	-0.282	-0.311	-0.288	-0.261	-0.28	0.081	0.212	0.185	-0.357	0.305	-0.37	-0.256	-0.235	0.043
163.m06277	CNAG_01179	YPR110C	RPC40	SPBC1289.07c	rpc40	orf19.3564	ca3491	RPC40	KOG1521	K	RNA polymerase I and III, subunit RPA40/RPC40	RPA42	RNA polymerase subunit, common to RNA polymerase I and III	DNA-directed RNA polymerase I and III subunit Rpc40 (predicted)	RNA polymerase (by homology)	None	None	None	None	None	Cne_OxR-dw_2.0	None	Cne_OxSR-dw_2.0	-0.321	1.167	0.375	-0.365	0.862	0.319	0.127	-0.062	0.383	-0.019	0.029	0.266	0.325	0.113	0.034	0.01	0.589	-0.155
163.m06278	CNAG_07437	YLR100W	ERG27	SPBC1709.07	erg27	orf19.3240	ca5437	ERG27	KOG1478	I	3-keto sterol reductase	3-keto sterol reductase	3-keto sterol reductase, catalyzes the last of three steps required to remove two C-4 methyl groups from an intermediate in ergosterol biosynthesis; mutants are sterol auxotrophs	3-keto sterol reductase (predicted)	3-keto sterol reductase (by homology)	None	None	None	None	None	Cne_OxR-dw_2.0	None	Cne_OxSR-dw_2.0	-0.158	0.887	0.227	-0.298	0.442	0.189	-0.078	-0.131	0.147	0.195	0.373	0.068	0.011	0.382	-0.253	-0.08	0.289	0.188
163.m06279	CNAG_01174	YJL108C	PRM10	SPAC7D4.12c	None	orf19.6527	ca4951	IPF13607	None	None	None	DUF1212 family protein	Pheromone-regulated protein, predicted to have 5 transmembrane segments; induced by treatment with 8-methoxypsoralen and UVA irradiation	DUF1212 family protein	unknown function	Cne_OsR-up_2.0	None	Cne_FxR-up_2.0	None	Cne_OxR-up_2.0	None	Cne_CSR-up_2.0	None	-0.003	0.359	-0.093	-0.392	0.491	0.239	-0.016	-0.015	0.153	-0.02	0.009	-0.071	-0.122	0.132	-0.139	-0.151	0.049	0.007
163.m06280	CNAG_01173	None	None	None	None	None	None	None	KOG3743	K	Recombination signal binding protein-J kappa(CBF1, Su(H), HS2NF5)	conserved hypothetical protein	None	None	None	None	None	None	None	None	None	None	None	0.008	0.857	0.202	-0.265	0.616	0.15	-0.017	-0.049	0.211	0.161	0.412	0.169	0.155	0.402	-0.231	-0.007	0.595	0.185
163.m06281	CNAG_01213	None	None	None	None	None	None	None	KOG2053	Z	Mitochondrial inheritance and actin cytoskeleton organization protein	conserved hypothetical protein	None	None	None	None	None	None	None	None	None	None	None	0.12	1.185	0.676	-0.352	0.61	-0.04	0.126	0.323	0.632	0.28	-0.012	0.57	0.233	0.111	0.219	0.075	0.565	0.006
163.m06282	CNAG_01216	YNR034W	SOL1	None	None	orf19.1355	ca0259	SOL1	KOG3147	G	6-phosphogluconolactonase - like protein	6-phosphogluconolactonase	Protein with a possible role in tRNA export; shows similarity to 6-phosphogluconolactonase non-catalytic domains but does not exhibit this enzymatic activity; homologous to Sol2p, Sol3p, and Sol4p	None	multicopy suppressor of los1-1	None	None	None	None	Cne_OxR-up_2.0	None	Cne_OxSR-up_2.0	None	0.149	0.465	0.168	-0.397	0.544	0.062	0.076	-0.052	0.207	-0.008	0.026	0.037	0.078	0.14	-0.365	-0.059	0.265	0.046
163.m06283	CNAG_01217	YKL059C	MPE1	SPBP8B7.15c	None	orf19.4628	ca5190	IPF10155	KOG0314	O	Predicted E3 ubiquitin ligase	retinoblastoma-binding protein	Essential conserved subunit of CPF (cleavage and polyadenylation factor), plays a role in 3' end formation of mRNA via the specific cleavage and polyadenylation of pre-mRNA, contains a putative RNA-binding zinc knuckle motif	ubiquitin-protein ligase E3 RBBP6 family involved in mRNA cleavage (predicted)	unknown function	None	None	None	None	Cne_OxR-up_2.0	None	Cne_OxSR-up_2.0	None	-1.17	-0.781	-1	<no data>	-3.524	2.55	<no data>	0.027	-0.499	-2.907	<no data>	0.392	-0.387	-0.427	<no data>	-2.974	-1.059	0.232
163.m06284	CNAG_01220	YGR029W	ERV1	SPAC3G6.08	erv1	orf19.2863.1	ca1664	ERV1.3f	KOG3355	O	Mitochondrial sulfhydryl oxidase involved in the biogenesis of cytosolic Fe/S proteins	mitochondrial FAD-linked sulfhydryl oxidase ERV1	Flavin-linked sulfhydryl oxidase of the mitochondrial intermembrane space (IMS), oxidizes Mia40p as part of a disulfide relay system that promotes IMS retention of imported proteins; ortholog of human hepatopoietin (ALR)	sulfhydryl oxidase (predicted)	Mitochondrial biogenesis and regulation of cell cycle, 3-prime end (by homology)	None	None	None	None	Cne_OxR-up_2.0	None	Cne_OxSR-up_2.0	None	0.029	1.125	0.568	-0.334	0.844	0.079	0.04	0.408	0.214	0.258	-0.024	0.486	0.212	0.115	0.002	0.1	0.433	-0.178
163.m06285	CNAG_01222	None	None	None	None	None	None	None	KOG4661	K	Hsp27-ERE-TATA-binding protein/Scaffold attachment factor (SAF-B)	conserved hypothetical protein	None	None	None	None	None	None	None	None	Cne_OxR-dw_2.0	None	Cne_OxSR-dw_2.0	0.065	0.723	0.315	-0.291	0.368	0.051	0.038	-0.249	0.151	0.076	0.405	0.062	0.035	-0.529	-0.151	-0.065	0.098	0.079
163.m06286	CNAG_07432	None	None	None	None	None	None	None	KOG0379	R	Kelch repeat-containing proteins	conserved hypothetical protein	None	None	None	None	None	None	None	None	None	None	None	1.766	0.678	-1.087	4.261	<no data>	<no data>	-1.17	-0.073	<no data>	3.7	<no data>	<no data>	<no data>	-0.41	0.305	-1.415	-4.248	0.366
163.m06288	CNAG_01236	YKL172W	EBP2	SPAC17H9.05	ebp2	orf19.4492	ca1443	IPF4776	KOG3080	A	Nucleolar protein-like/EBNA1-binding protein	Ebp2p	Essential protein required for the maturation of 25S rRNA and 60S ribosomal subunit assembly, localizes to the nucleolus; constituent of 66S pre-ribosomal particles	rRNA processing protein Ebp2	unknown Function	None	None	None	None	None	Cne_OxR-dw_2.0	None	Cne_OxSR-dw_2.0	-0.207	1.148	0.406	-0.372	0.52	0.114	-0.039	-0.184	0.192	0.206	0.06	0.314	0.08	-0.018	-0.175	-0.055	0.068	-0.152
163.m06289	CNAG_01239	None	None	None	None	None	None	None	None	None	None	chitin deacetylase	None	None	None	None	None	None	None	None	Cne_OxR-dw_2.0	None	Cne_OxSR-dw_2.0	0.382	-0.352	-0.268	-0.442	0.861	0.271	-0.07	0.223	0.33	0.244	0.264	-0.388	-0.081	-0.413	-0.891	-0.106	-0.634	0.35
163.m06290	CNAG_01241	YKL193C	SDS22	SPAC4A8.12c	sds22	orf19.820	ca4219	SDS22	KOG0531	T	Protein phosphatase 1, regulatory subunit, and related proteins	enzyme regulator	Conserved nuclear regulatory subunit of Glc7p type 1 protein serine-threonine phosphatase (PP1), functions positively with Glc7p to promote dephosphorylation of nuclear substrates required for chromosome transmission during mitosis	protein phosphatase regulatory subunit Sds22	regulatory subunit for the mitotic function of type I protein phosphatase (by homology)	None	None	None	None	None	None	None	None	0.093	0.815	0.423	-0.282	0.47	0.112	0.11	0	-0.3	0.141	0.615	0.215	0.235	0.471	-0.113	0.169	-0.065	0.237
163.m06291	CNAG_01241	YKL193C	SDS22	SPAC4A8.12c	sds22	orf19.820	ca4219	SDS22	KOG0531	T	Protein phosphatase 1, regulatory subunit, and related proteins	enzyme regulator	Conserved nuclear regulatory subunit of Glc7p type 1 protein serine-threonine phosphatase (PP1), functions positively with Glc7p to promote dephosphorylation of nuclear substrates required for chromosome transmission during mitosis	protein phosphatase regulatory subunit Sds22	regulatory subunit for the mitotic function of type I protein phosphatase (by homology)	None	None	None	None	None	None	None	None	0.15	0.708	0.294	-0.152	0.726	0.098	0.175	0.031	0.081	0.048	0.019	0	0.074	0.328	-0.045	-0.024	0.378	0.161
163.m06293	CNAG_01418	None	None	None	None	None	None	None	KOG4008	A	rRNA processing protein RRP7	conserved hypothetical protein	None	None	None	None	None	None	None	None	None	None	None	0.02	1.06	0.368	-0.302	0.629	0.14	0.121	-0.341	0.257	0.201	0.396	0.212	0.222	-0.621	0.004	-0.006	0.277	0.094
163.m06294	CNAG_01418	None	None	None	None	None	None	None	KOG4008	A	rRNA processing protein RRP7	conserved hypothetical protein	None	None	None	None	None	None	None	None	None	None	None	-0.239	0.842	0.33	-0.369	0.656	0.012	-0.02	-0.095	0.277	0.209	0.055	0.19	0.077	-0.068	-0.111	-0.006	0.069	-0.086
163.m06295	CNAG_01419	YDL146W	LDB17	SPBC24C6.10c	None	None	None	None	KOG4035	TZ	Coeffector of mDia Rho GTPase, regulates actin polymerization and cell adhesion turnover	conserved hypothetical protein	Protein of unknown function; GFP-fusion protein localizes to the cell periphery, cytoplasm, bud, and bud neck; null mutant shows a reduced affinity for the alcian blue dye suggesting a decreased net negative charge of the cell surface	conserved eukaryotic protein	None	None	None	None	None	None	None	None	None	0.16	1.04	0.623	-0.248	0.805	0.4	0.128	0.29	0.082	0.227	0.559	0.509	0.369	0.682	0.227	0.242	0.463	0.492
163.m06296	CNAG_01420	None	None	None	None	None	None	None	KOG3060	S	Uncharacterized conserved protein	conserved hypothetical protein	None	None	None	Cne_OsR-up_2.0	None	None	None	Cne_OxR-up_2.0	None	None	None	-0.04	0.303	-0.294	-0.228	0.42	0.252	0.066	0.226	0.165	-0.019	0.093	-0.415	-0.183	0.271	-0.216	-0.141	0.123	0.188
163.m06297	CNAG_01423	None	None	None	None	None	None	None	KOG1516	R	Carboxylesterase and related proteins	conserved hypothetical protein	None	None	None	None	None	None	None	None	None	None	None	0.128	0.926	0.431	-0.228	0.453	-0.187	0.029	-0.25	0.146	0.117	0.407	0.279	0.097	-0.622	-0.45	-0.074	-0.066	0.021
163.m06298	CNAG_01425	None	None	None	None	None	None	None	None	None	None	conserved hypothetical protein	None	None	None	None	None	None	None	None	None	None	None	0.027	1.344	0.54	-0.193	0.531	0.216	0.05	0.421	-0.336	0.239	0.653	0.421	0.356	0.594	-0.061	0.191	0.344	0.147
163.m06299	CNAG_01426	YJL053W	PEP8	SPAC4G9.13c	vps26	orf19.6927	ca4699	IPF4220	KOG3063	U	Membrane coat complex Retromer, subunit VPS26	vacuolar protein sorting 26	Vacuolar protein sorting protein that forms part of the multimeric membrane-associated retromer complex along with Vps35p, Vps29p, Vps17p, and Vps5p; essential for endosome-to-Golgi retrograde protein transport	retromer complex subunit Vps26	similar to Saccharomyces cerevisiae Pep8p involved in vacuolar protein sorting/targeting (by homology)	None	None	None	None	None	None	None	None	0.049	0.424	-0.099	-0.217	0.016	-0.102	0.105	-0.042	-0.229	-0.067	-0.036	-0.146	-0.27	0.333	-0.399	-0.138	-0.066	-0.014
163.m06303	CNAG_01429	None	None	None	None	None	None	None	KOG2389	K	Predicted bromodomain transcription factor	conserved hypothetical protein	None	None	None	None	None	None	None	None	None	None	None	-0.031	1.274	0.716	-0.277	0.254	0.225	0.02	0.292	-0.132	0.344	0.657	0.516	0.356	0.584	0.414	0.299	0.406	0.208
163.m06304	CNAG_01430	None	None	None	None	None	None	None	None	None	None	conserved hypothetical protein	None	None	None	None	None	None	None	None	None	None	None	-0.178	1.006	0.418	-0.374	0.414	0.091	-0.021	-0.075	0.102	0.208	0.051	0.148	0	-0.049	-0.267	-0.131	-0.104	-0.222
163.m06305	CNAG_01432	YCR072C	RSA4	SPCC18.05c	None	orf19.3778	ca0328	IPF15217.3f	KOG0271	S	Notchless-like WD40 repeat-containing protein	WD repeat protein	WD-repeat protein involved in ribosome biogenesis; may interact with ribosomes; required for maturation and efficient intra-nuclear transport or pre-60S ribosomal subunits, localizes to the nucleolus	notchless-like protein	WD-repeat protein, 3-prime end (by homology)	None	None	None	None	None	Cne_OxR-dw_2.0	None	Cne_OxSR-dw_2.0	0.025	1.311	0.413	-0.337	0.594	0.028	0.117	-0.176	0.224	0.114	0.496	0.427	0.199	-0.635	-0.046	-0.06	0.263	0.031
163.m06306	CNAG_07415	None	None	None	None	None	None	None	None	None	None	conserved hypothetical protein	None	None	None	None	Cne_OsR-dw_2.0	None	Cne_FxR-dw_2.0	None	None	None	None	-0.129	0.852	0.208	-0.335	0.418	0.036	-0.041	-0.044	0.193	0.197	0.018	0.116	-0.007	-0.102	-0.174	-0.175	-0.054	-0.19
163.m06310	CNAG_01436	YDL047W	SIT4	SPCC1739.12	ppe1	orf19.5200	ca1767	SIT4	KOG0373	DT	Serine/threonine specific protein phosphatase involved in cell cycle control, PP2A-related	serine/threonine-protein phosphatase ppe1	Type 2A-related serine-threonine phosphatase that functions in the G1/S transition of the mitotic cycle; cytoplasmic and nuclear protein that modulates functions mediated by Pkc1p including cell wall and actin cytoskeleton organization	serine/threonine protein phosphatase Ppe1	Ser/thr protein phosphatase	None	None	None	None	None	None	None	None	-0.035	1.282	0.466	-0.328	0.595	0.014	0.104	-0.172	0.235	0.143	0.434	0.213	0.224	-0.575	0.091	-0.071	0.217	0.034
163.m06311	CNAG_01438	YLR182W	SWI6	SPBC336.12c	cdc10	None	None	None	None	None	None	transcription factor	Transcription cofactor, forms complexes with DNA-binding proteins Swi4p and Mbp1p to regulate transcription at the G1/S transition; involved in meiotic gene expression; localization regulated by phosphorylation; potential Cdc28p substrate	MBF transcription factor complex subunit Cdc10	None	None	None	None	None	None	None	None	None	-0.107	0.85	0.188	-0.356	0.382	-0.02	-0.115	-0.07	0.087	0.168	0.053	0.061	-0.107	-0.225	-0.312	-0.226	-0.197	-0.207
163.m06313	CNAG_01439	YPR178W	PRP4	SPAC227.12	None	orf19.7343	ca5576	PRP4	KOG0272	A	U4/U6 small nuclear ribonucleoprotein Prp4 (contains WD40 repeats)	U4/U6 small nuclear ribonucleoprotein Prp4	Splicing factor, component of the U4/U6-U5 snRNP complex	U4/U6 x U5 tri-snRNP complex subunit Prp4 family (predicted)	pre-mRNA-processing U4/U6 small nuclear ribonucleoprotein (by homology)	None	None	None	None	None	None	None	None	0.097	1.217	0.222	-0.298	0.734	0.027	-0.001	-0.208	0.063	0.081	0.375	0.283	0.165	-0.653	-0.188	-0.135	-0.003	-0.089
163.m06315	CNAG_01437	YCL059C	KRR1	SPBC25B2.05	mis3	orf19.661	ca4096	KRR1	KOG2874	JD	rRNA processing protein	ribosomal RNA assembly protein mis3	Essential nucleolar protein required for the synthesis of 18S rRNA and for the assembly of 40S ribosomal subunit	rRNA processing protein Mis3	involved in cell division and spore germination	None	None	None	None	None	None	None	None	-0.185	1.047	0.354	-0.361	0.301	0.063	-0.007	-0.126	0.171	0.151	0.106	0.27	-0.005	-0.19	-0.176	-0.107	-0.151	-0.26
163.m06317	CNAG_01435	YDR023W	SES1	SPAC29A4.15	None	orf19.269	ca1598	SES1	KOG2509	J	Seryl-tRNA synthetase	serine-tRNA ligase	Cytosolic seryl-tRNA synthetase, class II aminoacyl-tRNA synthetase that aminoacylates tRNA(Ser), displays tRNA-dependent amino acid recognition which enhances discrimination of the serine substrate, interacts with peroxin Pex21p	serine-tRNA ligase	seryl-tRNA synthetase (by homology)	None	None	None	None	None	Cne_OxR-dw_2.0	None	Cne_OxSR-dw_2.0	0.028	1.095	0.528	-0.303	0.613	-0.082	0.081	-0.112	0.155	0.099	0.319	0.183	0.106	0.376	-0.132	-0.006	0.462	0.112
163.m06318	CNAG_01431	None	None	None	None	None	None	None	KOG0490	R	Transcription factor, contains HOX domain	conserved hypothetical protein	None	None	None	None	None	None	None	None	None	None	None	-0.199	0.979	0.001	-0.357	0.688	0.293	0.036	-0.073	0.181	0.029	0.033	0.176	0.136	0.085	-0.15	-0.198	0.196	-0.163
163.m06319	CNAG_01428	YJR047C	ANB1	SPBC336.10c	tif512	orf19.3426	ca3752	TIF51.3f	KOG3271	J	Translation initiation factor 5A (eIF-5A)	initiation factor 5a	Translation initiation factor eIF-5A, promotes formation of the first peptide bond; similar to and functionally redundant with Hyp2p; undergoes an essential hypusination modification; expressed under anaerobic conditions	translation initiation factor eIF5A	translation initiation factor eIF-5A, 3-prime end	None	None	None	None	None	Cne_OxR-dw_2.0	None	Cne_OxSR-dw_2.0	0.459	0.643	0.247	-0.274	0.263	-0.19	-0.14	-0.17	-0.109	0.03	0.293	0.089	-0.191	0.238	-0.403	-0.1	0.119	0.138
163.m06320	CNAG_01424	None	None	None	None	None	None	None	KOG4360	S	Uncharacterized coiled coil protein	conserved hypothetical protein	None	None	None	None	None	None	None	Cne_OxR-up_2.0	None	Cne_OxSR-up_2.0	None	-0.2	0.827	0.086	-0.403	0.633	0.122	0.046	-0.06	0.165	0.009	0.02	0.318	0.05	0.076	-0.288	-0.164	0.294	-0.138
163.m06321	CNAG_01422	YBR287W	None	SPAC5D6.04	None	orf19.6117	ca0262	IPF20054	KOG2722	S	Predicted membrane protein	endoplasmic reticulum protein	None	auxin family transmembrane transporter (predicted)	None	None	None	None	None	Cne_OxR-up_2.0	None	Cne_OxSR-up_2.0	None	0.229	0.811	0.073	-0.32	0.536	0.463	-0.069	-0.083	0.178	0.244	0.447	0.102	0.183	0.36	0.305	0.086	0.169	0.564
163.m06324	CNAG_01422	YBR287W	None	SPAC5D6.04	None	orf19.6117	ca0262	IPF20054	KOG2722	S	Predicted membrane protein	endoplasmic reticulum protein	None	auxin family transmembrane transporter (predicted)	None	None	None	None	None	Cne_OxR-up_2.0	None	Cne_OxSR-up_2.0	None	0.141	0.635	-0.068	-0.438	0.536	0.518	-0.023	-0.072	0.198	0.069	0.072	-0.03	0.061	0.158	0.233	-0.004	0.011	0.28
163.m06325	CNAG_01421	None	None	None	None	None	None	None	None	None	None	conserved hypothetical protein	None	None	None	None	None	None	None	None	None	None	None	0.233	0.532	0.148	-0.289	0.219	0.069	-0.185	-0.285	-0.041	0.132	0.346	-0.021	-0.109	0.323	-0.225	-0.107	0.21	0.187
163.m06327	CNAG_01417	None	None	None	None	orf19.4639	ca1065	IPF9002	None	None	None	conserved hypothetical protein	None	None	unknown function	None	None	Cne_FxR-up_2.0	None	None	None	Cne_FxSR-up_2.0	None	-0.129	0.405	-0.323	-0.379	0.686	0.233	0.077	-0.028	0.267	0.046	0.012	-0.409	0.085	0.119	-0.455	0.038	0.2	0.284
163.m06328	CNAG_01415	None	None	SPAC11E3.02c	None	orf19.6012	ca2990	IPF5092	None	None	None	cytoplasmic protein	None	C2 domain protein	unknown function	None	None	None	None	None	None	None	None	0.014	1.119	0.43	-0.287	0.6	0.146	0.039	-0.234	0.292	0.212	0.385	0.334	0.187	0.396	0.044	-0.082	0.617	0.211
163.m06329	CNAG_01413	YNL016W	PUB1	SPBC23E6.01c	None	orf19.7368	ca5666	PUB1	KOG0118	R	FOG: RRM domain	nuclear and cytoplasmic polyadenylated RNA-binding protein pub1	Poly(A)+ RNA-binding protein, abundant mRNP-component protein that binds mRNA and is required for stability of a number of mRNAs; not reported to associate with polyribosomes	RNA-binding protein, rrm type	Major polyadenylated RNA-binding protein (by homology)	None	None	None	None	None	None	None	None	0.067	0.693	0.205	-0.381	0.339	0.069	-0.032	-0.112	-0.04	0.043	0.022	0.086	-0.103	0.121	-0.274	-0.084	0.092	0.068
163.m06330	CNAG_01412	YMR165C	PAH1	SPAC1952.13	ned1	orf19.1462	ca4540	SMP2	KOG2116	NI	Protein involved in plasmid maintenance/nuclear protein involved in lipid metabolism	nuclear elongation and deformation protein 1	Mg<sup>2+</sup>-dependent phosphatidate (PA) phosphatase, catalyzes the dephosphorylation of PA to yield diacylglycerol and P<sub>i</sub>, responsible for de novo lipid synthesis; homologous to mammalian lipin 1	lipin Ned1	Involved in plasmid maintenance, respiration and cell proliferation (by homology)	None	None	None	None	Cne_OxR-up_2.0	None	Cne_OxSR-up_2.0	None	-0.043	0.95	0.496	-0.236	0.756	0.13	0.071	-0.104	0.371	0.165	0.376	0.184	0.147	0.399	-0.098	-0.042	0.73	0.241
163.m06331	CNAG_01406	None	None	None	None	None	None	None	KOG1721	R	1 FOG: Zn-finger	conserved hypothetical protein	None	None	None	None	None	None	None	None	None	None	None	-0.027	0.901	0.267	-0.268	0.602	0.325	0.232	0.278	0.481	0.086	-0.003	0.345	0.221	0.516	-0.04	0.011	0.819	0.224
163.m06332	CNAG_01405	None	None	None	None	None	None	None	KOG1721	R	1 FOG: Zn-finger	conserved hypothetical protein	None	None	None	Cne_OsR-up_2.0	None	None	None	None	None	Cne_OsSR-up_2.0	None	-0.176	0.967	0.241	-0.436	0.618	0.285	0.043	-0.07	0.342	0.07	0.012	0.147	0.121	0.202	-0.151	-0.069	0.482	-0.105
163.m06333	CNAG_01404	None	None	SPAC57A7.12	None	None	None	None	KOG0101	O	Molecular chaperones HSP70/HSC70, HSP70 superfamily	hsp71-like protein	None	heat shock protein Pdr13 (predicted)	None	None	None	None	None	None	Cne_OxR-dw_2.0	None	Cne_OxSR-dw_2.0	0.16	1.052	0.262	-0.3	0.444	0.121	-0.054	-0.207	0.107	0.15	0.288	0.203	0.118	-0.611	0.006	-0.099	-0.028	-0.028
163.m06336	CNAG_01442	YCL017C	NFS1	SPBC21D10.11c	nfs1	orf19.7081	ca5617	SPL1	KOG1549	E	Cysteine desulfurase NFS1	cysteine desulfhydrase	Cysteine desulfurase involved in iron-sulfur cluster (Fe/S) biogenesis; required for the post-transcriptional thio-modification of mitochondrial and cytoplasmic tRNAs; essential protein located predominantly in mitochondria	iron-sulfur cluster assembly protein Nfs1	tRNA splicing protein	None	None	None	None	Cne_OxR-up_2.0	None	Cne_OxSR-up_2.0	None	0.236	0.651	0.327	-0.187	0.368	0.199	0.129	0.24	-0.137	0.211	0.603	0.401	0.171	0.573	-0.232	0.156	0.056	0.248
163.m06339	CNAG_01445	YDL149W	ATG9	SPBC15D4.07c	atg9	orf19.5974	ca6085	IPF32	KOG2173	R	Integral membrane protein	APG9	Transmembrane protein involved in formation of Cvt and autophagic vesicles; cycles between the pre-autophagosomal structure and other cytosolic punctate structures, not found in autophagosomes	autophagy associated protein Atg9 (predicted)	similar to Saccharomyces cerevisiae Apg9p integral membrane protein required for Cvt and autophagy transport (by homology)	None	None	None	None	None	None	None	None	-0.052	0.736	0.183	-0.275	0.632	0.053	0.231	0.207	0.594	0.077	0.007	0.087	0.141	0.439	-0.165	-0.062	0.532	0.305
163.m06340	CNAG_01446	None	None	None	None	orf19.3548.1	None	None	None	None	None	hypothetical protein	None	None	None	None	None	None	None	None	None	None	None	0.8	-0.224	0.496	-0.299	-0.841	0.204	-0.255	-0.489	-0.172	-0.052	0.085	0.542	-0.035	-0.132	-0.033	0.376	-0.334	0.277
163.m06341	CNAG_01448	None	None	None	None	None	None	None	KOG1216	WV	von Willebrand factor and related coagulation proteins	163.m06341p	None	None	None	None	None	Cne_FxR-up_2.0	None	Cne_OxR-up_2.0	None	None	None	-0.093	0.937	0.366	-0.28	0.985	0.215	0.269	0.21	0.56	0.104	0.022	0.156	0.233	0.488	-0.047	0.059	0.632	0.363
163.m06342	CNAG_06809	YJL057C	IKS1	None	None	orf19.428	ca4053	IKS1	KOG0032	T	Ca2+/calmodulin-dependent protein kinase, EF-Hand protein superfamily	other/IKS protein kinase	Putative serine/threonine kinase; expression is induced during mild heat stress; deletion mutants are hypersensitive to copper sulphate and resistant to sorbate; interacts with an N-terminal fragment of Sst2p	None	PROBABLE SERINE/THREONINE-PROTEIN KINASE	None	None	None	None	None	None	None	None	-0.16	0.851	0.267	-0.354	0.429	0.065	-0.015	0.074	0.012	0.142	0.071	0.174	-0.062	-0.199	-0.138	-0.12	-0.421	-0.243
163.m06343	CNAG_07407	None	None	None	None	None	None	None	None	None	None	fungal mating-type pheromone	None	None	None	None	None	None	None	None	None	None	None	<no data>	-4.858	-2.193	<no data>	2	<no data>	-2.807	-0.547	<no data>	<no data>	-1.115	<no data>	1.263	-3.7	2.644	<no data>	<no data>	<no data>
163.m06345	CNAG_01455	YJL189W	RPL39	SPCC663.04	rpl39	orf19.6264.4	None	None	KOG0002	J	60s ribosomal protein L39	RPL39p	Protein component of the large (60S) ribosomal subunit, has similarity to rat L39 ribosomal protein; required for ribosome biogenesis; exhibits genetic interactions with SIS1 and PAB1	60S ribosomal protein L39	None	None	None	None	None	None	Cne_OxR-dw_2.0	None	Cne_OxSR-dw_2.0	1.06	0.571	0.338	-0.153	-0.349	-0.421	-0.343	0.075	-0.667	0.238	-0.119	0.21	-0.509	-0.03	-0.143	-0.169	-0.637	-0.144
163.m06347	CNAG_07407	None	None	None	None	None	None	None	None	None	None	fungal mating-type pheromone	None	None	None	None	None	None	None	None	None	None	None	1	<no data>	0	16.61	<no data>	<no data>	-0.485	<no data>	3.907	0.788	-3.17	0	16.61	<no data>	<no data>	-2	<no data>	<no data>
163.m06348	CNAG_06971	YOR326W	MYO2	SPCC1919.10c	myo52	orf19.5015	ca5247	MYO2	KOG0160	Z	Myosin class V heavy chain	MYO2	One of two type V myosin motors (along with MYO4) involved in actin-based transport of cargos; required for the polarized delivery of secretory vesicles, the vacuole, late Golgi elements, peroxisomes, and the mitotic spindle	myosin type V	Myosin heavy chain (by homology)	None	None	None	None	None	None	None	None	0.079	1.177	0.577	-0.23	0.544	0.181	0.02	-0.061	0.162	0.147	0.385	0.401	0.111	-0.573	0.151	0.03	0.103	0.039
163.m06349	CNAG_06808	YKL178C	STE3	None	None	orf19.2492	ca3810	IPF9230	None	None	None	pheromone receptor CPRalpha	Receptor for a factor receptor, transcribed in alpha cells and required for mating by alpha cells, couples to MAP kinase cascade to mediate pheromone response; ligand bound receptors are endocytosed and recycled to the plasma membrane; GPCR	None	similar to Saccharomyces cerevisiae Ste3p pheromone a-factor receptor (by homology)	None	None	None	None	None	None	None	None	-0.019	1.073	0.629	-0.398	0.81	0.136	0.143	0.661	0.731	0.233	-0.017	0.375	0.353	0.058	0.29	0.021	0.457	-0.243
163.m06351	CNAG_07005	None	None	SPAC26H5.04	None	None	None	None	KOG1293	R	Proteins containing armadillo/beta-catenin-like repeat	BSP2	None	vacuolar import and degradation protein Vid28	None	None	None	None	None	None	Cne_OxR-dw_2.0	None	Cne_OxSR-dw_2.0	<no data>	-0.644	<no data>	<no data>	<no data>	<no data>	-2	<no data>	<no data>	-1.441	<no data>	-1.138	<no data>	-2	<no data>	1	-4.322	0
163.m06352	CNAG_07004	YFL018C	LPD1	SPAC1002.09c	dld1	orf19.6127	ca2998	LPD1	KOG1335	C	Dihydrolipoamide dehydrogenase	LPD1	Dihydrolipoamide dehydrogenase, the lipoamide dehydrogenase component (E3) of the pyruvate dehydrogenase and 2-oxoglutarate dehydrogenase multi-enzyme complexes	dihydrolipoamide dehydrogenase Dld1	dihydrolipoamide dehydrogenase (by homology)	None	None	None	None	Cne_OxR-up_2.0	None	Cne_OxSR-up_2.0	None	0.747	0.546	0.019	-0.07	0.007	-0.147	-0.238	-0.025	-0.296	0.109	0.07	0.32	-0.287	-0.197	-0.085	-0.209	-0.268	-0.151
163.m06353	CNAG_07409	YFL036W	RPO41	SPAC26H5.12	rpo41	orf19.6041	ca4904	RPO41	KOG1038	KL	Mitochondrial/chloroplast DNA-directed RNA polymerase RPO41, provides primers for DNA replication-initiation	mitochondrial-related RNA polymerase	Mitochondrial RNA polymerase; single subunit enzyme similar to those of T3 and T7 bacteriophages; requires a specificity subunit encoded by MTF1 for promoter recognition	mitochondrial RNA polymerase	Mitochondrial DNA-directed RNA polymerase (by homology)	None	None	None	None	None	None	None	None	0.019	0.823	0.334	-0.351	0.5	-0.09	-0.031	-0.115	0.007	0.129	0.366	0.149	0.151	-0.629	-0.15	-0.023	-0.048	0.021
163.m06354	CNAG_07408	YNL298W	CLA4	SPAC1F5.09c	shk2	orf19.4890	ca1710	CLA4	KOG0578	T	p21-activated serine/threonine protein kinase	STE/STE20/PAKA protein kinase	Cdc42p activated signal transducing kinase of the PAK (p21-activated kinase) family, involved in septin ring assembly and cytokinesis; directly phosphorylates septins Cdc3p and Cdc10p; other yeast PAK family members are Ste20p and Skm1p	PAK-related kinase Shk2	protein kinase homolog (by homology)	None	None	None	None	None	None	None	None	-0.122	0.933	0.303	-0.326	0.48	0.049	-0.05	0.062	0.198	0.098	0.117	0.294	0.038	-0.276	-0.184	-0.096	-0.092	-0.308
163.m06355	None	None	None	None	None	None	None	None	None	None	None	None	None	None	None	None	None	None	None	None	None	None	None	0.358	0.825	0.443	-0.353	0.704	0.012	0.057	0.584	0.439	0.298	-0.011	0.389	0.216	0.034	0.022	0.009	0.1	-0.133
163.m06357	CNAG_06813	None	None	None	None	None	None	None	KOG2458	R	Endoplasmic reticulum protein EP58, contains filamin rod domain and KDEL motif	CAP1	None	None	None	None	None	None	None	None	None	None	None	0.036	0.872	0.302	-0.261	0.582	0.051	0.043	-0.079	0.142	0.15	0.43	0.238	0.023	-0.663	-0.194	-0.104	-0.014	-0.084
163.m06358	CNAG_06817	None	None	SPAC1399.01c	None	orf19.2882	ca1407	UAPC	None	None	None	UAP1	None	membrane transporter (predicted)	purine permease (by homology)	Cne_OsR-up_2.0	None	None	None	None	None	Cne_OsSR-up_2.0	None	-0.159	1.068	0.425	-0.362	0.615	0.083	-0.006	0.023	0.261	0.125	0.062	0.247	0.155	-0.239	-0.065	-0.038	0.028	-0.293
163.m06360	CNAG_06819	YGL150C	INO80	SPAC29B12.01	ino80	orf19.1734	ca0305	INO80	KOG0388	L	SNF2 family DNA-dependent ATPase	Inoc1 protein	ATPase that forms a large complex, containing actin and several actin-related proteins, that has chromatin remodeling activity and 3' to 5' DNA helicase activity in vitro; shows similarity to the Snf2p family of ATPases	SNF2 family helicase Ino80	DNA helicase (by homology)	None	None	None	None	None	None	None	None	0.134	0.997	0.423	-0.227	0.684	-0.069	0.112	-0.003	0.296	0.125	0.439	0.118	0.102	-0.592	-0.153	-0.123	0.038	-0.203
163.m06361	CNAG_06821	None	None	None	None	None	None	None	KOG0039	PQ	Ferric reductase, NADH/NADPH oxidase and related proteins	ferric reductase transmembrane component 4	None	None	None	None	None	None	None	Cne_OxR-up_2.0	None	Cne_OxSR-up_2.0	None	-0.126	0.993	0.262	-0.334	0.44	0.072	-0.069	-0.054	0.146	0.117	0.081	0.169	0.092	-0.357	-0.188	-0.128	-0.282	-0.31
163.m06363	CNAG_06806	YPR004C	AIM45	SPAC27D7.06	None	orf19.2150	ca3190	IPF11603	KOG3954	C	Electron transfer flavoprotein, alpha subunit	ETF1	Protein with similarity to mammalian electron transfer flavoprotein complex subunit ETF-alpha; interacts with yeast frataxin Yfh1p; null mutant displays increased frequency of mitochondrial genome loss (petite formation)	electron transfer flavoprotein alpha subunit	unknown function	None	None	None	None	None	None	None	None	<no data>	0.959	-0.152	-2	<no data>	1.678	<no data>	<no data>	<no data>	1.17	2.17	<no data>	-2.807	<no data>	<no data>	0.485	<no data>	<no data>
163.m06364	CNAG_06980	YLR362W	STE11	SPBC1D7.05	byr2	orf19.844	ca2018	STE11	KOG0198	T	MEKK and related serine/threonine protein kinases	STE/STE11 protein kinase	Signal transducing MEK kinase involved in pheromone response and pseudohyphal/invasive growth pathways where it phosphorylates Ste7p, and the high osmolarity response pathway, via phosphorylation of Pbs2p; regulated by Ste20p and Ste50p	MAP kinase kinase kinase Byr2	ser/thr protein kinase of the MEKK family (by homology)	None	None	None	None	None	None	None	None	0.116	1.186	0.525	-0.24	0.698	0.158	0.108	-0.059	0.394	0.125	0.466	0.288	0.149	-0.663	-0.126	0.035	0.171	-0.087
163.m06365	None	None	None	None	None	None	None	None	None	None	None	None	None	None	None	None	None	None	None	None	Cne_OxR-dw_2.0	None	Cne_OxSR-dw_2.0	0.098	0.774	0.395	-0.32	0.267	0.001	-0.05	-0.005	-0.218	0.125	0.019	0.291	0.021	-0.275	-0.141	-0.087	-0.335	-0.276
163.m06369	CNAG_07413	YNR053C	NOG2	SPAC6F6.03c	None	orf19.5732	None	None	KOG2423	R	Nucleolar GTPase	nucleolar GTP-binding protein	Putative GTPase that associates with pre-60S ribosomal subunits in the nucleolus and is required for their nuclear export and maturation	ribosome export GTPase (predicted)	None	Cne_OsR-up_2.0	None	Cne_FxR-up_2.0	None	None	None	None	None	-0.115	1.012	0.465	-0.08	0.579	0.217	0.132	0.079	0.187	0.053	0.152	0.208	0.278	0.271	-0.305	-0.116	0.527	0.108
163.m06370	CNAG_07414	YIL145C	PAN6	SPAC5H10.08c	pan6	orf19.163	ca0463	IPF18979.5eoc	KOG3042	H	Panthothenate synthetase	pantoate-beta-alanine ligase	Pantothenate synthase, also known as pantoate-beta-alanine ligase, required for pantothenic acid biosynthesis, deletion causes pantothenic acid auxotrophy, homologous to E. coli panC	pantoate-beta-alanine ligase	unknown function	None	None	None	None	None	None	None	None	0.762	0.392	0.225	-0.367	1.067	0.336	0.027	0.196	0.342	-0.083	-0.015	-0.17	0.234	0.435	0.028	0.003	-0.146	0.376
163.m06371	CNAG_01444	None	None	None	None	None	None	None	KOG2351	K	RNA polymerase II, fourth largest subunit	conserved hypothetical protein	None	None	None	None	None	None	None	None	None	None	None	0.217	0.953	0.512	-0.295	0.64	0.112	0.046	0.543	0.353	0.273	-0.012	0.303	0.098	-0.017	0.008	0.024	0.194	-0.167
163.m06372	CNAG_01441	None	None	None	None	None	None	None	KOG1216	WV	von Willebrand factor and related coagulation proteins	conserved hypothetical protein	None	None	None	None	None	None	None	None	Cne_OxR-dw_2.0	None	Cne_OxSR-dw_2.0	-0.095	1.054	-0.035	-0.094	0.33	0.211	0.081	0.136	0.115	0.05	0.145	0.002	0.152	0.188	-0.343	-0.028	0.519	0.168
163.m06373	CNAG_06829	YGR175C	ERG1	SPBC713.12	erg1	orf19.406	ca1353	ERG1	KOG1298	I	Squalene monooxygenase	squalene monooxygenase	Squalene epoxidase, catalyzes the epoxidation of squalene to 2,3-oxidosqualene; plays an essential role in the ergosterol-biosynthesis pathway and is the specific target of the antifungal drug terbinafine	squalene monooxygenase Erg1 (predicted)	squalene epoxidase	None	Cne_OsR-dw_2.0	None	Cne_FxR-dw_2.0	None	Cne_OxR-dw_2.0	None	Cne_CSR-dw_2.0	<no data>	-3.17	<no data>	2.392	<no data>	1.585	-0.778	1.874	2.503	<no data>	<no data>	0.387	-2.322	<no data>	<no data>	<no data>	-0.363	-0.348
163.m06374	CNAG_06830	YCL030C	HIS4	SPBC1711.13	his2	orf19.5639	ca2559	HIS4	KOG2697	E	Histidinol dehydrogenase	histidinol dehydrogenase	Multifunctional enzyme containing phosphoribosyl-ATP pyrophosphatase, phosphoribosyl-AMP cyclohydrolase, and histidinol dehydrogenase activities; catalyzes the second, third, ninth and tenth steps in histidine biosynthesis	histidinol dehydrogenase His2 (predicted)	Histidine biosynthesis trifunctional protein (phosphoribosyl-AMP cyclohydrolase/phosphoribosyl-ATP pyrophosphatase/histidinol dehydrogenase)	None	None	None	None	Cne_OxR-up_2.0	None	Cne_OxSR-up_2.0	None	-0.058	0.74	0.633	-0.354	0.652	0.198	-0.013	0.329	0.168	0.307	0.03	0.245	0.189	0.052	-0.113	-0.04	0.48	-0.232
163.m06375	CNAG_06834	YDL095W	PMT1	SPAC22A12.07c	ogm1	orf19.5171	ca4424	PMT1	KOG3359	O	Dolichyl-phosphate-mannose:protein O-mannosyl transferase	dolichyl-phosphate-mannose-protein mannosyltransferase	Protein O-mannosyltransferase, transfers mannose residues from dolichyl phosphate-D-mannose to protein serine/threonine residues; acts in a complex with Pmt2p, can instead interact with Pmt3p in some conditions; target for new antifungals	protein O-mannosyltransferase Ogm1	mannosyltransferase	None	None	None	None	None	None	None	None	-0.24	0.644	0.008	-0.487	0.624	0.048	0.313	0.202	0.395	-0.081	-0.108	-0.406	0.558	0.477	-0.247	0.156	0.044	0.149
163.m06376	CNAG_06832	None	None	None	None	None	None	None	None	None	None	glucosidase	None	None	None	None	None	None	None	None	None	None	None	-0.147	0.76	0.192	-0.122	0.722	0.179	-0.05	0.044	-0.027	0.067	0.19	0.142	0.004	0.15	-0.346	-0.12	0.297	0.143
163.m06377	CNAG_06828	YKL146W	AVT3	SPAC3H1.09c	None	orf19.1142	ca0954	IPF13162	KOG1304	E	Amino acid transporters	vacuolar amino acid transporter 3	Vacuolar transporter, exports large neutral amino acids from the vacuole; member of a family of seven S. cerevisiae genes (AVT1-7) related to vesicular GABA-glycine transporters	vacuolar amino acid transporter (predicted)	unknown function	None	None	None	None	None	None	None	None	-0.261	0.648	0.227	-0.436	1.006	0.062	0.224	0.154	0.232	-0.058	0.019	-0.217	0.323	0.41	-0.292	0.13	0.042	0.162
163.m06378	CNAG_06827	None	None	None	None	None	None	None	None	None	None	conserved hypothetical protein	None	None	None	None	None	None	None	Cne_OxR-up_2.0	None	Cne_OxSR-up_2.0	None	-0.196	0.587	0.076	-0.121	0.212	-0.293	-0.04	-0.172	-0.235	-0.013	0.19	-0.004	-0.147	0.103	-0.802	-0.125	0.44	-0.046
163.m06380	CNAG_06824	YBR103W	SIF2	None	None	None	None	None	KOG0273	B	Beta-transducin family (WD-40 repeat) protein	ebi	WD40 repeat-containing subunit of the Set3C histone deacetylase complex, which represses early/middle sporulation genes; antagonizes telomeric silencing; binds specifically to the Sir4p N-terminus	None	None	None	None	None	None	Cne_OxR-up_2.0	None	Cne_OxSR-up_2.0	None	0.031	0.289	-0.073	-0.349	0.383	0.1	-0.06	0.125	0.031	-0.055	-0.005	-0.146	0.193	0.419	-0.399	0.043	-0.032	0.191
163.m06381	CNAG_06820	None	None	None	None	None	None	None	None	None	None	conserved hypothetical protein	None	None	None	None	None	None	None	Cne_OxR-up_2.0	None	Cne_OxSR-up_2.0	None	1.524	<no data>	<no data>	<no data>	<no data>	-0.621	<no data>	16.61	-0.485	<no data>	<no data>	3.624	<no data>	0.807	0	<no data>	<no data>	<no data>
163.m06383	CNAG_06818	None	None	None	None	None	None	None	None	None	None	163.m06383p	None	None	None	None	None	None	None	None	None	None	None	-0.199	1.129	0.49	-0.24	0.901	0.302	0.157	-0.11	0.395	0.04	0.143	0.355	0.512	0.211	-0.262	0.037	0.655	0.074
163.m06384	CNAG_06815	None	None	SPCC1494.01	None	orf19.1306	ca1326	IPF6679	KOG0143	QR	Iron/ascorbate family oxidoreductases	FAO1	None	iron/ascorbate oxidoreductase family	unknown function	None	None	None	None	None	None	None	None	-0.386	0.885	-0.075	-0.435	0.701	0.065	0.04	0.111	0.232	-0.024	-0.015	-0.349	0.487	0.453	-0.576	0.048	0.018	0.088
163.m06385	CNAG_06814	None	None	None	None	None	None	None	KOG0773	K	Transcription factor MEIS1 and related HOX domain proteins	SXI1	None	None	None	None	None	None	None	Cne_OxR-up_2.0	None	Cne_OxSR-up_2.0	None	-0.208	1.274	0.203	-0.184	0.752	0.264	0.173	-0.238	0.524	0.042	0.184	0.378	0.544	0.149	-0.224	0.085	0.793	0.014
163.m06386	CNAG_06814	None	None	None	None	None	None	None	KOG0773	K	Transcription factor MEIS1 and related HOX domain proteins	SXI1	None	None	None	None	None	None	None	None	None	None	None	-0.351	0.91	0	-0.515	0.492	0.217	0.502	-0.009	0.377	-0.024	-0.007	-0.087	0.623	0.516	-0.01	0.303	0.106	0.064
163.m06388	CNAG_06812	YKR031C	SPO14	SPAC2F7.16c	None	orf19.1161	ca0587	PLD1	KOG1329	I	Phospholipase D1	SPO14	Phospholipase D, catalyzes the hydrolysis of phosphatidylcholine, producing choline and phosphatidic acid; involved in Sec14p-independent secretion; required for meiosis and spore formation; differently regulated in secretion and meiosis	phospholipase D (predicted)	phospholipase D	None	None	None	None	None	None	None	None	-0.155	1.009	0.311	-0.281	0.613	0.127	-0.171	-0.155	0.312	0.092	0.197	0.221	0.024	-0.007	-0.292	-0.157	0.27	-0.19
163.m06389	CNAG_06811	YLR061W	RPL22A	SPAC11E3.15	rpl22	None	None	None	KOG3434	J	60S ribosomal protein L22	RPL22	Protein component of the large (60S) ribosomal subunit, has similarity to Rpl22Bp and to rat L22 ribosomal protein	60S ribosomal protein L22	None	None	None	None	None	None	Cne_OxR-dw_2.0	None	Cne_OxSR-dw_2.0	1.066	1.11	0.718	-0.028	-0.013	-0.301	-0.095	0.189	-0.203	0.27	-0.117	0.661	-0.18	0.15	-0.026	-0.026	-0.207	-0.072
163.m06391	None	None	None	None	None	None	None	None	None	None	None	None	None	None	None	None	None	None	None	None	None	None	None	-0.121	1.299	0.032	-0.078	0.718	0.243	0.534	0.356	0.367	0.137	0.14	0.311	0.654	0.318	0.209	0.351	0.564	0.424
163.m06392	CNAG_07411	YJR119C	JHD2	SPAC1002.05c	jmj2	orf19.5651	ca4361	IPF16104	KOG1246	R	DNA-binding protein jumonji/RBP2/SMCY, contains JmjC domain	RUM1	JmjC domain family histone demethylase specific for H3-K4 (lysine at position 4 of the histone H3 protein); removes methyl groups specifically added by Set1p methyltransferase	histone demethylase Jmj2 (predicted)	unknown function	Cne_OsR-up_2.0	None	None	None	None	None	Cne_OsSR-up_2.0	None	-0.061	0.618	0.211	-0.469	0.481	0.072	0.229	-0.095	0.139	0.059	0.206	0.203	0.185	-0.062	-0.249	-0.094	-0.295	-0.158
163.m06393	CNAG_07015	None	None	None	None	None	None	None	KOG4240	T	Multidomain protein, contains SPEC repeats, PH, SH3, and separate rac-specific and rho-specific guanine nucleotide exchange factor domains	GEF1	None	None	None	None	None	None	None	None	None	None	None	-0.125	1.118	0.497	-0.279	0.635	0.123	-0.149	-0.196	0.199	0.091	0.184	0.308	0.021	-0.05	-0.013	-0.121	0.293	-0.177
163.m06394	CNAG_07410	None	None	SPAC19D5.03	cid1	None	None	None	KOG2277	D	S-M checkpoint control protein CID1 and related nucleotidyltransferases	CID1	None	poly(A) polymerase Cid1	None	None	None	None	None	None	None	None	None	0.005	0.554	0.135	-0.461	0.381	0.044	0.222	-0.166	-0.147	0.024	0.228	-0.02	0.037	-0.19	-0.188	-0.017	-0.543	-0.171
163.m06395	CNAG_06836	None	None	None	None	None	None	None	KOG2741	GQ	Dimeric dihydrodiol dehydrogenase	oxidoreductase	None	None	None	None	None	None	None	None	None	None	None	-0.181	1.249	0.386	-0.273	0.587	0.187	-0.154	-0.166	0.242	0.111	0.15	0.2	0.135	-0.007	-0.261	-0.08	0.384	-0.094
163.m06396	CNAG_06839	YJR073C	OPI3	SPBC337.16	cho1	orf19.7446	ca5736	OPI3	KOG4142	I	Phospholipid methyltransferase	phosphatidyl-N-methylethanolamine N-methyltransferase	Phospholipid methyltransferase (methylene-fatty-acyl-phospholipid synthase), catalyzes the last two steps in phosphatidylcholine biosynthesis	phosphatidyl-N-methylethanolamine N-methyltransferase (predicted)	Methylene-fatty-acyl-phospholipid synthase (by homology)	None	None	None	None	None	None	None	None	0.679	0.347	0.13	-0.081	0.03	0.039	0.008	0.477	-0.128	-0.045	0.017	0.037	-0.12	0.242	-0.113	0.032	0.118	0.409
163.m06397	CNAG_06840	YOR133W	EFT1	SPCP31B10.07	eft202	orf19.5788	None	None	KOG0469	J	Elongation factor 2	translation elongation factor 2	Elongation factor 2 (EF-2), also encoded by EFT2; catalyzes ribosomal translocation during protein synthesis; contains diphthamide, the unique posttranslationally modified histidine residue specifically ADP-ribosylated by diphtheria toxin	translation elongation factor 2	None	None	None	None	None	None	None	None	None	0.494	0.242	0.023	-0.392	0.358	0.001	0.056	-0.13	0.013	0.05	0.159	-0.039	-0.14	0.055	-0.182	-0.175	-0.353	0.225
163.m06402	CNAG_06847	YOR167C	RPS28A	SPCC285.15c	rps2802	orf19.7048.1	ca5646	RPS28B.3f	KOG3502	J	40S ribosomal protein S28	ribosomal protein S28e	Protein component of the small (40S) ribosomal subunit; nearly identical to Rps28Bp and has similarity to rat S28 ribosomal protein	40S ribosomal protein S28	Ribosomal protein S28B (S33B) (YS27), 3-prime end (by homology)	None	None	None	None	None	None	None	None	0.886	0.778	0.346	-0.186	0.014	-0.07	0.217	0.209	-0.311	0.192	0.542	0.522	0.225	0.232	0.14	0.237	-0.042	0.168
163.m06403	CNAG_07400	YLL018C	DPS1	SPCC1223.07c	None	orf19.2407	ca3052	DPS1	KOG0556	J	Aspartyl-tRNA synthetase	aspartate-tRNA ligase	Cytoplasmic aspartyl-tRNA synthetase, homodimeric enzyme that catalyzes the specific aspartylation of tRNA(Asp); class II aminoacyl tRNA synthetase; binding to its own mRNA may confer autoregulation	aspartate-tRNA ligase (predicted)	aspartyl-tRNA synthetase (by homology)	None	None	None	None	None	Cne_OxR-dw_2.0	None	Cne_OxSR-dw_2.0	0.141	0.898	0.339	-0.232	0.358	0.082	-0.144	-0.093	0.05	0.124	0.171	0.157	-0.027	0.013	-0.215	-0.138	0.149	-0.132
163.m06404	CNAG_06861	YDR145W	TAF12	SPAC15A10.02	taf12	orf19.470	ca1622	IPF10045	KOG1142	K	Transcription initiation factor TFIID, subunit TAF12 (also component of histone acetyltransferase SAGA)	TAF15	Subunit (61/68 kDa) of TFIID and SAGA complexes, involved in RNA polymerase II transcription initiation and in chromatin modification, similar to histone H2A	transcription factor TFIID complex subunit A (predicted)	similar to Saccharomyces cerevisiae Taf61p TFIID and SAGA subunit (by homology)	None	None	None	None	None	None	None	None	-0.04	1.128	0.124	0.064	0.329	0.239	0.389	0.762	0.475	0.103	0.161	0.204	0.434	0.474	0.123	0.315	0.48	0.349
163.m06405	CNAG_06862	YNL326C	PFA3	SPBC2F12.15c	None	orf19.6802	ca5904	IPF5944	KOG1315	R	Predicted DHHC-type Zn-finger protein	vacuolar protein	Palmitoyltransferase for Vac8p, required for vacuolar membrane fusion; contains an Asp-His-His-Cys-cysteine rich (DHHC-CRD) domain; autoacylates; required for vacuolar integrity under stress conditions	palmitoyltransferase (predicted)	Unknown function	None	None	None	None	None	None	None	None	-0.217	0.874	-0.412	-0.231	0.782	0.391	0.612	0.471	0.383	-0.095	0.005	-0.921	0.671	0.302	-0.17	0.346	0.536	0.486
163.m06406	CNAG_06860	YOL034W	SMC5	SPAC14C4.02c	smc5	orf19.2417	ca3046	IPF7295	KOG0979	BDL	Structural maintenance of chromosome protein SMC5/Spr18, SMC superfamily	nuclear protein	Structural maintenance of chromosomes (SMC) protein; essential subunit of the Mms21-Smc5-Smc6 complex; required for growth and DNA repair; S. pombe homolog forms a heterodimer with S. pombe Rad18p that is involved in DNA repair	Smc5-6 complex SMC subunit Smc5	unknown function	None	None	None	None	None	None	None	None	0.189	0.816	0.406	-0.496	0.557	0.06	0.19	-0.159	0.011	0.052	0.246	0.431	0.186	-0.14	-0.062	-0.027	-0.375	-0.201
163.m06407	None	None	None	None	None	None	None	None	None	None	None	None	None	None	None	None	None	None	None	None	None	None	None	-0.024	1.538	0.753	0.074	1.04	0.624	0.586	1.026	0.927	0.071	0.162	0.501	0.986	0.445	0.206	0.348	1.07	0.462
163.m06408	CNAG_07399	None	None	None	None	None	None	None	KOG1878	K	Nuclear receptor coregulator SMRT/SMRTER, contains Myb-like domains	conserved hypothetical protein	None	None	None	None	None	None	None	None	None	None	None	0.15	1.324	1.057	-0.201	0.616	0.389	0.399	0.574	0.75	0.293	-0.013	0.94	0.686	0.469	0.326	0.236	0.682	0.355
163.m06409	None	None	None	None	None	None	None	None	None	None	None	None	None	None	None	None	None	None	None	None	Cne_OxR-dw_2.0	None	Cne_OxSR-dw_2.0	-0.189	0.32	-0.125	-0.313	0.286	-0.141	0.139	0.355	0.427	0.011	0.048	-0.459	0.095	0.027	-0.782	-0.149	0.055	0.304
163.m06410	CNAG_06852	None	None	None	None	None	None	None	None	None	None	conserved hypothetical protein	None	None	None	None	None	None	None	None	None	None	None	0.308	0.748	0.175	-0.222	0.392	0.009	-0.247	-0.171	0.155	0.104	0.166	0.163	-0.092	-0.088	-0.293	-0.13	0.004	-0.085
163.m06411	CNAG_06849	YIR034C	LYS1	SPAC227.18	lys3	orf19.1789.1	ca0343	LYS1	KOG0172	E	Lysine-ketoglutarate reductase/saccharopine dehydrogenase	saccharopine dehydrogenase	Saccharopine dehydrogenase (NAD+, L-lysine-forming), catalyzes the conversion of saccharopine to L-lysine, which is the final step in the lysine biosynthesis pathway	saccharopine dehydrogenase [NAD+, L-lysine forming]	saccharopine dehydrogenase (by homology)	None	None	None	None	Cne_OxR-up_2.0	None	Cne_OxSR-up_2.0	None	0.294	0.34	0.176	-0.404	0.421	-0.203	-0.152	-0.135	0.071	-0.004	0.225	0	-0.218	-0.201	-0.501	-0.283	-0.271	0.113
163.m06412	CNAG_07403	YKL197C	PEX1	SPCC553.03	pex1	orf19.6460	ca3667	IPF16323	KOG0735	O	AAA+-type ATPase	peroxisome biogenesis factor 1	AAA-peroxin that heterodimerizes with AAA-peroxin Pex6p and participates in the recycling of peroxisomal signal receptor Pex5p from the peroxisomal membrane to the cystosol; induced by oleic acid and upregulated during anaerobiosis	AAA family ATPase Pex1 (predicted)	similar to Saccharomyces cerevisiae Pex1p peroxisomal assembly protein (by homology)	None	None	None	None	None	None	None	None	-0.114	1.238	0.47	-0.273	0.532	0.145	-0.091	-0.203	0.293	0.135	0.143	0.324	0.128	-0.111	-0.085	-0.065	0.333	-0.26
163.m06413	CNAG_06838	YPL029W	SUV3	SPAC637.11	suv3	orf19.4519	ca2908	SUV3	KOG0953	A	Mitochondrial RNA helicase SUV3, DEAD-box superfamily	mitochondrial RNA helicase	ATP-dependent RNA helicase, component of the mitochondrial degradosome along with the RNase Dss1p; the degradosome associates with the ribosome and mediates turnover of aberrant or unprocessed RNAs	mitochondrial ATP-dependent RNA helicase Suv3 (predicted)	ATP-dependent RNA helicase, mitochondrial (by homology)	None	None	None	None	None	None	None	None	0.075	0.566	-0.077	-0.53	0.5	0.083	-0.073	-0.358	-0.134	0.013	0.31	0.142	-0.065	-0.281	-0.238	-0.209	-0.408	-0.121
163.m06414	CNAG_06837	None	None	SPCPB16A4.02c	None	orf19.4245	ca4130	IPF20009	None	None	None	PH domain-containing protein	None	conserved fungal protein	Unknown function	None	None	None	None	None	None	None	None	-0.162	1.022	0.277	-0.188	0.485	0.194	0.027	-0.165	0.244	0.015	0.13	0.228	0.184	0.094	-0.584	0.001	0.582	0.129
163.m06415	CNAG_06835	YPR159W	KRE6	SPAC23H3.11c	None	None	None	None	None	None	None	glucosidase	Protein required for beta-1,6 glucan biosynthesis; putative beta-glucan synthase; appears functionally redundant with Skn1p	glucosidase (predicted)	None	None	Cne_OsR-dw_2.0	None	None	None	None	None	Cne_OsSR-dw_2.0	0.201	-0.526	-0.707	-0.452	0.426	0.448	-0.101	0.195	0.084	-0.014	0.343	-0.583	-0.309	-0.028	-0.278	-0.142	-0.371	0.137
163.m06416	CNAG_01244	None	None	None	None	None	None	None	None	None	None	conserved hypothetical protein	None	None	None	None	None	None	None	None	None	None	None	-0.076	1.074	0.375	0.062	0.551	0.225	0.448	0.288	0.417	0.052	0.214	0.428	0.479	0.43	-0.026	0.263	0.701	0.312
163.m06417	CNAG_01243	YHR119W	SET1	SPCC306.04c	set1	orf19.6009	ca2985	SET1	KOG1080	BK	Histone H3 (Lys4) methyltransferase complex, subunit SET1 and related methyltransferases	histone-lysine N-methyltransferase	Histone methyltransferase, subunit of the COMPASS (Set1C) complex which methylates histone H3 on lysine 4; required in transcriptional silencing near telomeres and at the silent mating type loci; contains a SET domain	histone lysine methyltransferase Set1	Chromatin regulatory protein (by homology)	None	None	None	None	None	None	None	None	-0.236	1.225	0.366	-0.218	0.693	0.226	0.123	-0.343	0.412	0.06	0.143	0.332	0.343	-0.043	-0.305	0.041	0.685	-0.074
163.m06418	CNAG_01242	None	None	None	None	None	None	None	None	None	None	conserved hypothetical protein	None	None	None	None	None	None	None	Cne_OxR-up_2.0	None	Cne_OxSR-up_2.0	None	-0.152	0.016	-0.448	-0.392	0.519	0.007	0.125	0.108	0.413	-0.08	0.069	-0.297	0.102	0.396	-0.263	0.089	-0.093	0.198
163.m06419	CNAG_01238	YMR062C	ECM40	SPBC1271.14	None	orf19.6500	ca1732	ECM42	KOG2786	E	Putative glutamate/ornithine acetyltransferase	ornithine acetyltransferase	Mitochondrial ornithine acetyltransferase, catalyzes the fifth step in arginine biosynthesis; also possesses acetylglutamate synthase activity, regenerates acetylglutamate while forming ornithine	glutamate N-acetyltransferase (predicted)	Acetylornithine acetyltransferase (by homology)	None	None	None	None	None	Cne_OxR-dw_2.0	None	Cne_OxSR-dw_2.0	-0.045	0.894	0.161	-0.259	0.717	0.206	0.012	-0.206	0.367	0.002	0.112	0.092	0.263	0.017	-0.281	0.02	0.436	0.111
163.m06420	CNAG_01235	YOR151C	RPB2	SPAC23G3.01	rpb2	orf19.3349	ca0987	RPB140	KOG0214	K	RNA polymerase II, second largest subunit	DNA-directed RNA polymerase II large subunit	RNA polymerase II second largest subunit B150, part of central core; similar to bacterial beta subunit	DNA-directed RNA polymerase II complex subunit Rpb2	DNA-dependent RNA polymerase II RPB140	None	None	None	None	None	None	None	None	0.222	0.569	0.231	-0.357	0.355	0.04	0.273	-0.065	0.158	-0.144	-0.049	0.147	0.163	0.428	-0.215	0.125	-0.086	0.156
163.m06421	CNAG_01234	YDR104C	SPO71	SPAC26H5.11	None	orf19.2129	None	None	None	None	None	spore wall assembly-related protein	Meiosis-specific protein of unknown function, required for spore wall formation during sporulation; dispensable for both nuclear divisions during meiosis	spore wall assembly protein (predicted)	None	None	None	None	None	None	None	None	None	-0.172	1.088	0.154	-0.201	0.763	0.267	0.065	-0.247	0.331	0.032	0.154	0.053	0.344	0.003	-0.237	0.078	0.531	-0.073
163.m06422	CNAG_01232	YGL006W	PMC1	SPAPB2B4.04c	None	orf19.1727	ca1645	PMC1	KOG0204	P	Calcium transporting ATPase	calcium-transporting ATPase	Vacuolar Ca2+ ATPase involved in depleting cytosol of Ca2+ ions; prevents growth inhibition by activation of calcineurin in the presence of elevated concentrations of calcium; similar to mammalian PMCA1a	P-type ATPase, calcium transporting Pmc1	Ca2+-transporting P-type ATPase (by homology)	Cne_OsR-up_2.0	None	None	None	Cne_OxR-up_2.0	None	None	None	-0.221	0.605	0.341	-0.511	0.696	0.263	0.178	0.19	0.589	-0.1	-0.016	0.216	0.472	0.461	-0.206	0.149	0.027	0.063
163.m06423	CNAG_01231	None	None	SPAC11D3.09	None	orf19.3418	ca3758	IPF8889	KOG2964	E	Arginase family protein	arginase	None	agmatinase (predicted)	putative arginase (by homology)	None	None	None	Cne_FxR-dw_2.0	None	Cne_OxR-dw_2.0	None	None	-0.158	0.943	0.102	-0.241	0.611	0.17	-0.007	-0.474	0.28	0.024	0.163	0.108	0.233	0.051	-0.284	0.107	0.605	-0.029
163.m06424	CNAG_01230	None	None	None	None	None	None	None	None	None	None	chitin deacetylase 2	None	None	None	None	None	Cne_FxR-up_2.0	None	Cne_OxR-up_2.0	None	None	None	0.195	-0.253	-0.35	-0.721	0.155	0.261	-0.055	-0.002	-0.052	-0.092	0.462	-0.633	-0.02	-0.173	-0.276	-0.056	-0.478	0.069
163.m06425	CNAG_01229	None	None	None	None	None	None	None	KOG0538	C	Glycolate oxidase	L-mandelate dehydrogenase	None	None	None	None	None	None	None	None	None	None	None	-0.243	1.185	0.519	-0.316	0.68	0.195	-0.05	-0.435	0.402	0.029	0.113	0.427	0.292	0.129	-0.249	0.06	0.748	-0.158
163.m06426	CNAG_01223	YJL079C	PRY1	None	None	orf19.7218	ca5344	PRY2	KOG3017	S	Defense-related protein containing SCP domain	conserved hypothetical protein	Protein of unknown function, has similarity to Pry2p and Pry3p and to the plant PR-1 class of pathogen related proteins	None	putative pathogen related proteins (by homology)	None	None	None	None	None	None	None	None	-0.227	0.273	-0.336	-0.245	0.393	0.12	0.591	0.357	0.154	-0.007	0.022	-0.318	0.051	0.19	-0.228	0.364	0.49	0.534
163.m06427	CNAG_01221	YBR002C	RER2	SPAC4D7.04c	None	orf19.4028	ca4793	IPF3375	KOG1602	I	Cis-prenyltransferase	prenyltransferase	Cis-prenyltransferase involved in dolichol synthesis; participates in endoplasmic reticulum (ER) protein sorting	cis-prenyltransferase (predicted)	similar to Saccharomyces cerevisiae Rer2p cis-prenyltransferase, a key enzyme in dolichol synthesis (by homology)	None	None	None	None	None	None	None	None	-0.015	0.761	0.409	-0.375	0.689	0.111	0.17	-0.198	0.183	-0.065	-0.059	0.257	0.502	0.494	0.095	0.198	0.101	-0.011
163.m06428	CNAG_07433	None	None	None	None	None	None	None	None	None	None	conserved hypothetical protein	None	None	None	None	None	None	None	None	None	None	None	-0.127	0.855	0.152	-0.05	0.541	0.322	-0.043	0.259	0.36	0.157	0.126	0.376	0.147	0.211	-0.124	-0.103	0.484	0.411
163.m06429	CNAG_01214	None	None	None	None	None	None	None	None	None	None	alpha-1,6-mannosyltransferase	None	None	None	None	None	None	None	Cne_OxR-up_2.0	None	Cne_OxSR-up_2.0	None	-0.173	1.1	0.393	-0.309	0.444	0.14	-0.145	-0.107	0.363	0.131	0.132	0.239	0.122	-0.073	0.048	0.024	0.409	-0.178
163.m06430	CNAG_01211	None	None	None	None	None	None	None	KOG3081	U	Vesicle coat complex COPI, epsilon subunit	conserved hypothetical protein	None	None	None	None	None	None	None	None	None	None	None	0.558	0.396	-0.011	-0.479	0.247	-0.078	0.106	-0.206	-0.267	0.033	0.341	0.16	-0.171	-0.158	-0.173	-0.135	-0.312	-0.079
163.m06431	CNAG_01209	YFR019W	FAB1	SPBC3E7.01	fab1	orf19.1513	ca2179	FAB1	KOG0230	T	Phosphatidylinositol-4-phosphate 5-kinase and related FYVE finger-containing proteins	1-phosphatidylinositol-3-phosphate 5-kinase	1-phosphatidylinositol-3-phosphate 5-kinase; vacuolar membrane kinase that generates phosphatidylinositol (3,5)P2, which is involved in vacuolar sorting and homeostasis	1-phosphatidylinositol-3-phosphate 5-kinase Fab1	phosphatidylinositol 3-phosphate 5-kinase (by homology)	None	None	None	None	None	None	None	None	-0.022	0.955	0.376	-0.259	0.461	0.224	-0.101	-0.036	0.209	0.15	0.159	0.254	0.039	-0.06	-0.055	-0.07	0.215	-0.061
163.m06432	CNAG_01245	None	None	None	None	None	None	None	KOG4197	R	FOG: PPR repeat	conserved hypothetical protein	None	None	None	None	None	None	None	None	None	None	None	-0.144	0.955	-0.45	-0.452	0.512	0.499	0.623	0.354	0.373	-0.044	0.033	0.017	0.509	0.438	0.018	0.428	0.514	0.424
163.m06433	CNAG_01246	None	None	None	None	None	None	None	KOG3830	S	Uncharacterized conserved protein	conserved hypothetical protein	None	None	None	None	None	None	None	None	None	None	None	-0.042	1.31	0.52	-0.112	0.297	0.29	0.331	0.402	0.599	0.096	0.173	0.526	0.489	0.196	0.122	0.293	0.948	0.385
163.m06434	CNAG_01248	YLR386W	VAC14	SPBC25H2.03	None	orf19.6411	ca5119	IPF1320	KOG0212	S	Uncharacterized conserved protein	Vac14 protein	Protein involved in regulated synthesis of PtdIns(3,5)P(2), in control of trafficking of some proteins to the vacuole lumen via the MVB, and in maintenance of vacuole size and acidity; interacts with Fig4p; activator of Fab1p	vacuolar protein involved in phosphoinositide metabolism	unknown function	None	None	None	None	None	None	None	None	0.364	0.862	0.389	-0.233	0.328	-0.119	0.391	0.301	-0.13	0.186	0.714	0.694	0.419	-0.012	0.506	0.503	-0.098	0.006
163.m06435	CNAG_01249	None	None	None	None	None	None	None	KOG1721	R	1 FOG: Zn-finger	conserved hypothetical protein	None	None	None	None	None	None	None	None	None	None	None	-0.097	0.596	-0.129	-0.307	0.782	0.078	0.404	0.032	0.249	-0.045	0.007	-0.038	0.31	0.272	-0.094	0.32	0.172	0.351
163.m06436	CNAG_01251	YKL010C	UFD4	SPAC12B10.01c	None	orf19.3237	ca5435	UFD4	KOG0170	O	E3 ubiquitin protein ligase	ubiquitin fusion degradation protein 4	Ubiquitin-protein ligase (E3) that interacts with Rpt4p and Rpt6p, two subunits of the 19S particle of the 26S proteasome; cytoplasmic E3 involved in the degradation of ubiquitin fusion proteins	ubiquitin-protein ligase E3 (predicted)	ubiquitin fusion degradation protein (by homology)	None	None	None	None	Cne_OxR-up_2.0	None	Cne_OxSR-up_2.0	None	0.095	0.349	0.112	-0.459	0.537	0.084	0.203	-0.085	0.182	0.026	0.365	-0.128	-0.066	-0.16	-0.227	-0.045	-0.451	-0.074
163.m06438	CNAG_01252	YOR251C	None	SPCC4B3.01	None	orf19.1356	ca0258	IPF17112	KOG1529	V	Mercaptopyruvate sulfurtransferase/thiosulfate sulfurtransferase	thiosulfate sulfurtransferase	None	thiosulfate sulfurtransferase	thiosulfate sulfurtransferase (by homology)	None	None	None	None	None	None	None	None	0.138	1.037	0.612	-0.16	0.792	0.273	0.113	-0.092	0.691	0.116	0.186	0.392	0.146	0.103	0.189	0.164	0.536	0.078
163.m06439	CNAG_01253	YHR005C-A	MRS11	SPAC222.03c	tim10	orf19.4577.3	ca5140	TIM10	KOG3480	U	Mitochondrial import inner membrane translocase, subunits TIM10/TIM12	protein transporter	Essential protein of the mitochondrial intermembrane space, forms a complex with Tim9p (TIM10 complex) that mediates insertion of hydrophobic proteins at the inner membrane, has homology to Mrs5p, which is also involved in this process	Tim9-Tim10 complex subunit Tim10 (predicted)	Subunit of the Tim22-complex (by homology)	None	None	None	None	None	Cne_OxR-dw_2.0	None	Cne_OxSR-dw_2.0	0.152	0.715	0.237	-0.321	0.242	-0.032	-0.138	-0.122	0.01	0.144	0.136	0.043	-0.135	-0.221	-0.387	-0.07	0.118	-0.095
163.m06440	CNAG_01255	None	None	None	None	None	None	None	KOG1217	T	Fibrillins and related proteins containing Ca2+-binding EGF-like domains	conserved hypothetical protein	None	None	None	None	None	None	None	None	None	None	None	0.543	0.148	-0.047	-0.492	0.743	0.149	0.072	0.338	0.193	0.081	0.077	-0.255	-0.103	0.103	-0.112	-0.105	-0.166	0.381
163.m06441	CNAG_01256	None	None	None	None	None	None	None	KOG1721	R	1 FOG: Zn-finger	conserved hypothetical protein	None	None	None	None	None	None	None	None	None	None	None	-0.008	1.419	0.866	-0.314	0.934	0.227	0.116	-0.019	0.562	0.102	0.161	0.485	0.262	0.098	0.215	0.164	0.771	0.039
163.m06442	CNAG_01256	None	None	None	None	None	None	None	KOG1721	R	1 FOG: Zn-finger	conserved hypothetical protein	None	None	None	None	None	None	None	None	None	None	None	-0.001	0.817	0.615	-0.461	0.793	0.32	0.299	0.375	0.493	0.104	0.032	0.472	0.395	0.191	0.249	0.007	-0.206	-0.01
163.m06444	CNAG_01257	YOR120W	GCY1	None	None	orf19.6758	ca5939	IPF3484	KOG1577	R	Aldo/keto reductase family proteins	aldo-keto reductase	Putative NADP(+) coupled glycerol dehydrogenase, proposed to be involved in an alternative pathway for glycerol catabolism; member of the aldo-keto reductase (AKR) family	None	aldo/keto reductase (by homology)	None	None	None	None	Cne_OxR-up_2.0	None	Cne_OxSR-up_2.0	None	0.187	0.849	0.317	-0.473	0.551	0.086	0.096	-0.245	-0.357	0.038	0.392	0.398	0.102	-0.274	-0.108	-0.075	-0.474	-0.1
163.m06445	CNAG_07430	YPL181W	CTI6	SPBC1685.08	None	orf19.5617	ca2753	IPF16806	KOG1844	R	PHD Zn-finger proteins	transcription factor binding protein	Protein that relieves transcriptional repression by binding to the Cyc8p-Tup1p corepressor and recruiting the SAGA complex to the repressed promoter; contains a PHD finger domain	histone deacetylase complex subunit Cti6	unknown function	None	None	None	None	None	None	None	None	0.207	0.991	0.531	-0.248	0.784	0.114	0.125	-0.054	0.503	0.147	0.23	0.403	0.148	0.047	-0.029	0.14	0.469	0.123
163.m06446	CNAG_01261	None	None	SPAC23A1.17	None	None	None	None	None	None	None	myosin I binding protein	None	WIP homolog	None	None	None	None	None	None	None	None	None	0.493	0.273	0.019	-0.422	0.486	-0.04	-0.014	0.228	0.121	0.103	0.091	-0.178	-0.105	0.014	-0.27	-0.304	-0.206	0.04
163.m06447	CNAG_01262	YOR212W	STE4	SPBC32H8.07	git5	orf19.799	ca0438	STE4	KOG0286	R	G-protein beta subunit	G-protein beta subunit GPB1	G protein beta subunit, forms a dimer with Ste18p to activate the mating signaling pathway, forms a heterotrimer with Gpa1p and Ste18p to dampen signaling; may recruit Rho1p to the polarized growth site during mating; contains WD40 repeats	heterotrimeric G protein beta subunit Git5	GTP-binding protein beta subunit of the pheromone pathway, 5-prime end (by homology)	None	None	None	None	None	Cne_OxR-dw_2.0	None	Cne_OxSR-dw_2.0	0.273	0.679	0.491	-0.234	0.567	0.09	0.031	0.07	0.284	0.166	0.182	0.047	-0.225	-0.011	-0.32	0.072	0.283	0.088
163.m06448	CNAG_01263	YJL012C	VTC4	SPCC1322.14c	vtc4	orf19.3363	ca0697	VTC4	KOG1161	P	Protein involved in vacuolar polyphosphate accumulation, contains SPX domain	vacuolar transporter chaperone 4	Vacuolar membrane protein involved in vacuolar polyphosphate accumulation; functions as a regulator of vacuolar H+-ATPase activity and vacuolar transporter chaperones; involved in non-autophagic vacuolar fusion	vacuolar transporter chaperone (VTC) complex subunit (predicted)	putative polyphosphate synthetase (by homology)	None	None	None	None	None	None	None	None	0.303	0.476	0.258	-0.509	0.698	0.233	0.343	0.239	-0.132	0.19	0.066	0.108	0.113	0.149	-0.03	0.027	-0.281	0.116
163.m06450	CNAG_01265	YMR077C	VPS20	SPBC215.14c	vps20	orf19.897	ca4675	IPF3664	KOG2910	R	Uncharacterized conserved protein predicted to be involved in protein sorting	charged multivesicular body protein 6-A	Myristoylated subunit of ESCRTIII, the endosomal sorting complex required for transport of transmembrane proteins into the multivesicular body pathway to the lysosomal/vacuolar lumen; cytoplasmic protein recruited to endosomal membranes	vacuolar sorting protein Vps20	unknown function	None	None	None	None	None	None	None	None	0.32	0.52	0.401	-0.196	0.481	-0.188	0.192	0.49	0.396	0.279	0.041	0.036	-0.147	0.361	-0.298	0.028	0.013	0.314
163.m06451	CNAG_01268	None	None	None	None	None	None	None	KOG0120	A	Splicing factor U2AF, large subunit (RRM superfamily)	conserved hypothetical protein	None	None	None	None	None	None	None	None	None	None	None	-0.047	1.466	0.818	-0.21	0.846	0.528	0.102	0.017	0.731	0.12	0.15	0.521	0.326	-0.043	0.16	0.13	0.86	0.075
163.m06452	None	None	None	None	None	None	None	None	None	None	None	None	None	None	None	None	None	None	None	None	None	None	None	0.256	1.481	-0.119	-0.204	0.107	0.219	0.515	0.096	-1.968	0.162	0.803	0.744	0.828	-0.015	16.61	0.734	0.044	0.026
163.m06453	CNAG_01270	None	None	None	None	None	None	None	KOG2297	J	Predicted translation factor, contains W2 domain	conserved hypothetical protein	None	None	None	None	None	None	None	None	Cne_OxR-dw_2.0	None	Cne_OxSR-dw_2.0	0.345	0.609	0.206	-0.146	0.225	-0.195	-0.176	-0.155	-0.105	0.132	0.136	0.066	-0.206	-0.119	-0.23	-0.108	-0.012	0.063
163.m06454	CNAG_01271	YJR050W	ISY1	SPBC32F12.05c	cwf12	orf19.6685	ca4288	IPF6662	KOG3068	A	mRNA splicing factor	pre-mRNA-splicing factor ISY1	Component of the spliceosome complex involved in pre-mRNA splicing, auxiliary splicing factor that may modulate Syf1p activity and help optimize splicing; isy1 syf2 double mutation activates the spindle checkpoint, causing cell cycle arrest	complexed with Cdc5 protein Cwf12	similar to Saccharomyces cerevisiae Isy1p pre-mRNA splicing factor (by homology)	None	None	None	None	None	None	None	None	0.09	0.625	0.123	-0.465	0.194	0.004	0.114	-0.224	-0.217	-0.002	0.413	-0.008	-0.109	-0.257	-0.154	-0.119	-0.622	-0.184
163.m06455	CNAG_01273	YNL255C	GIS2	None	None	orf19.3182	ca2534	IPF12793	KOG4400	O	E3 ubiquitin ligase interacting with arginine methyltransferase	zinc-finger protein GIS2	Protein with seven cysteine-rich CCHC zinc-finger motifs, similar to human CNBP, proposed to be involved in the RAS/cAMP signaling pathway	None	similar to Saccharomyces cerevisiae Gis2p containing seven zinc finger motifs and possibly involved in cytoplasmic ribosome function (by homology)	None	None	None	None	None	Cne_OxR-dw_2.0	None	Cne_OxSR-dw_2.0	0.642	0.732	0.344	-0.137	0.281	-0.136	0.172	0.399	-0.319	0.295	0.021	0.281	-0.157	0.465	-0.107	-0.006	-0.122	0.242
163.m06456	None	None	None	None	None	None	None	None	None	None	None	None	None	None	None	None	None	None	None	None	None	None	None	-1.7	0.939	0.58	-0.317	0.303	-0.18	0.536	0.218	-0.128	0.211	0.659	0.614	0.503	0.089	0.173	0.472	-0.269	0.12
163.m06458	CNAG_01277	None	None	None	None	None	None	None	None	None	None	conserved hypothetical protein	None	None	None	None	None	None	None	None	None	None	None	0.587	0.491	0.386	0.005	0.304	0.23	-0.036	0.518	0.205	0.279	0.021	0.014	-0.357	0.339	-0.026	-0.154	0.333	0.397
163.m06459	CNAG_01276	YLR383W	SMC6	SPCC5E4.06	smc6	orf19.6568	ca4880	RHC18	KOG0250	L	DNA repair protein RAD18 (SMC family protein)	conserved hypothetical protein	Protein involved in structural maintenance of chromosomes; essential subunit of Mms21-Smc5-Smc6 complex; required for growth, DNA repair, interchromosomal and sister chromatid recombination; homologous to S. pombe rad18	Smc5-6 complex SMC subunit Smc6	Recombination repair protein (by homology)	None	None	None	None	None	Cne_OxR-dw_2.0	None	Cne_OxSR-dw_2.0	0.001	1.015	0.343	-0.192	0.319	0.075	-0.128	-0.3	0.212	0.145	0.18	0.277	-0.126	-0.286	-0.094	-0.128	0.222	-0.16
[truncated: 6,926 more rows]
