# Supplementary material for: Comparative Transcriptome Analysis of the CO2 Sensing Pathway Via Differential Expression of Carbonic Anhydrase in Cryptococcus neoformans
Source: Oxford University Press journal article supplement (doi:10.1534/genetics.110.118315), 2010-06-03
Supplement: tables3.xls [file tables3.xls]

## Sheet: CAN2 BCS Cu 1.5 fold change
Gene ID/ name									Biological function							Stress Response Genes of C. neoformans var. grubii H99								Gene expression
C.neo (JEC21) ID	C.neo (H99) ID	Sce ID	Sce_Gene (SGD)	Spo ID	Spo_Gene (GeneDB)	Cal ID (SGTC)	Cal ID (CYGD)	Cal_Gene (CandiaDB)	KOGs ID	KOGs Catagory	KOGs Description	Cn.H99.v2 Description	Sce_Description (SGD)	Spo_Description (GeneDB)	Cal_Description (CandiaDB)	Cne_OsR-up_2.0	Cne_OsR-dw_2.0	Cne_FxR-up_2.0	Cne_FxR-dw_2.0	Cne_OxR-up_2.0	Cne_OxR-dw_2.0	Cne_SSR-up_2.0	Cne_SSR-dw_2.0	CAN2 BCS 12time	CAN2 Cu 12 time
163.m03860	CNAG_01019	YJR104C	SOD1	SPAC821.10c	sod1	orf19.2770.1	ca4120	SOD1	KOG0441	P	Cu2+/Zn2+ superoxide dismutase SOD1	Cu/Zn superoxide dismutase	Cytosolic superoxide dismutase; some mutations are analogous to those that cause ALS (amyotrophic lateral sclerosis) in humans	superoxide dismutase Sod1	Cu,Zn-superoxide dismutase	None	None	None	None	None	None	None	None	0	1.345
163.m03930	CNAG_00979	YLR411W	CTR3	SPCC1393.10	ctr4	None	None	None	KOG3386	P	Copper transporter	copper uptake transporter	High-affinity copper transporter of the plasma membrane, acts as a trimer; gene is disrupted by a Ty2 transposon insertion in many laboratory strains of S. cerevisiae	copper transporter complex subunit Ctr4	None	None	Cne_OsR-dw_2.0	None	Cne_FxR-dw_2.0	None	Cne_OxR-dw_2.0	None	Cne_CSR-dw_2.0	0	-2.331
163.m06489	CNAG_01314	YHR202W	None	SPBPB2B2.06c	None	orf19.5342	ca5500	IPF768	KOG4419	F	5' nucleotidase	vacuolar protein	None	phosphoprotein phosphatase (predicted)	unknown function	None	None	None	None	Cne_OxR-up_2.0	None	Cne_OxSR-up_2.0	None	0	-0.83
164.m02533	None	None	None	None	None	None	None	None	None	None	None	None	None	None	None	None	None	None	None	None	None	None	None	0	-0.679
167.m03357	CNAG_02337	YHR128W	FUR1	SPAC1B3.01c	None	orf19.2640	ca2069	FUR1	KOG4203	TZ	Armadillo/beta-Catenin/plakoglobin	uracil phosphoribosyltransferase 1	Uracil phosphoribosyltransferase, synthesizes UMP from uracil; involved in the pyrimidine salvage pathway	uracil phosphoribosyltransferase (predicted)	Uracil phosphoribosyltransferase (by homology)	None	None	None	None	None	None	None	None	0	0.585
176.m02377	None	None	None	None	None	None	None	None	None	None	None	None	None	None	None	None	None	None	None	None	None	None	None	0	-0.741
177.m02973	CNAG_03465	None	None	None	None	None	None	None	KOG1263	Q	Multicopper oxidases	laccase	None	None	None	None	None	None	None	None	None	None	None	0	0.784
177.m03382	CNAG_03465	None	None	None	None	None	None	None	KOG1263	Q	Multicopper oxidases	laccase	None	None	None	None	None	None	None	None	None	None	None	0	1.046
179.m00044	CNAG_07789	None	None	None	None	None	None	None	KOG0351	L	ATP-dependent DNA helicase	conserved hypothetical protein	None	None	None	None	None	None	None	None	None	None	None	0	-0.724
179.m00343	CNAG_02775	None	None	None	None	None	None	None	None	None	None	conserved hypothetical protein	None	None	None	None	Cne_OsR-dw_2.0	None	None	None	Cne_OxR-dw_2.0	None	None	0	-2.069
181.m08050	None	None	None	None	None	None	None	None	None	None	None	None	None	None	None	None	None	None	None	Cne_OxR-up_2.0	None	Cne_OxSR-up_2.0	None	0	2.195
181.m08783	CNAG_00542	None	None	None	None	None	None	None	KOG2614	CR	Kynurenine 3-monooxygenase and related flavoprotein monooxygenases	conserved hypothetical protein	None	None	None	None	None	None	None	None	None	None	None	0	0.76
184.m04432	CNAG_00306	None	None	None	None	None	None	None	KOG1836	W	Extracellular matrix glycoprotein Laminin subunits alpha and gamma	conserved hypothetical protein	None	None	None	None	None	None	None	None	None	None	None	0	2.263
184.m04802	CNAG_05144	YNL036W	NCE103	None	None	orf19.1721	ca2796	IPF8405	KOG1578	P	Predicted carbonic anhydrase involved in protection against oxidative damage	carbonic anhydrase 2	Carbonic anhydrase; poorly transcribed under aerobic conditions and at an undetectable level under anaerobic conditions; involved in non-classical protein export pathway	None	similar to Saccharomyces cerevisiae Nce103p involved in non-classical protein export pathway (by homology)	None	None	None	None	Cne_OxR-up_2.0	None	Cne_OxSR-up_2.0	None	0	-3.205

## Sheet: CAN2 BCS Cu zero-transform
Gene ID/ name									Biological function							Stress Response Genes of C. neoformans var. grubii H99								Gene expression
C.neo (JEC21) ID	C.neo (H99) ID	Sce ID	Sce_Gene (SGD)	Spo ID	Spo_Gene (GeneDB)	Cal ID (SGTC)	Cal ID (CYGD)	Cal_Gene (CandiaDB)	KOGs ID	KOGs Catagory	KOGs Description	Cn.H99.v2 Description	Sce_Description (SGD)	Spo_Description (GeneDB)	Cal_Description (CandiaDB)	Cne_OsR-up_2.0	Cne_OsR-dw_2.0	Cne_FxR-up_2.0	Cne_FxR-dw_2.0	Cne_OxR-up_2.0	Cne_OxR-dw_2.0	Cne_SSR-up_2.0	Cne_SSR-dw_2.0	CAN2 BCS 12time	CAN2 Cu 12 time
181.m07807	CNAG_00027	None	None	None	None	None	None	None	None	None	None	transcriptional activator	None	None	None	None	None	None	None	None	None	None	None	0	0.25
181.m07827	CNAG_00054	None	None	None	None	None	None	None	None	None	None	DUF1264 domain-containing protein	None	None	None	None	Cne_OsR-dw_2.0	None	None	Cne_OxR-up_2.0	None	Cne_OxSR-up_2.0	Cne_OsSR-dw_2.0	0	0.308
181.m07930	CNAG_00165	YLR017W	MEU1	SPAC16C9.02c	None	orf19.6938	ca4708	MEU1	KOG3985	F	Methylthioadenosine phosphorylase MTAP	5'-methylthioadenosine phosphorylase	Methylthioadenosine phosphorylase (MTAP), catalyzes the initial step in the methionine salvage pathway; affects polyamine biosynthesis through regulation of ornithine decarboxylase (Spe1p) activity; regulates ADH2 gene expression	S-methyl-5-thioadenosine phosphorylase (predicted)	regulator of ADH2 expression (by homology)	None	None	None	None	None	None	None	None	0	0.313
181.m07936	CNAG_00174	None	None	None	None	None	None	None	KOG1198	CR	Zinc-binding oxidoreductase	conserved hypothetical protein	None	None	None	None	None	None	None	None	None	None	None	0	0.283
184.m04432	CNAG_00306	None	None	None	None	None	None	None	KOG1836	W	Extracellular matrix glycoprotein Laminin subunits alpha and gamma	conserved hypothetical protein	None	None	None	None	None	None	None	None	None	None	None	0	2.263
181.m08254	CNAG_00515	None	None	None	None	None	None	None	KOG0023	Q	Alcohol dehydrogenase, class V	mannitol dehydrogenase	None	None	None	None	None	None	None	None	None	None	None	0	-0.242
181.m08783	CNAG_00542	None	None	None	None	None	None	None	KOG2614	CR	Kynurenine 3-monooxygenase and related flavoprotein monooxygenases	conserved hypothetical protein	None	None	None	None	None	None	None	None	None	None	None	0	0.76
181.m08356	CNAG_00627	None	None	SPBC23G7.09	matmc_2	None	None	None	KOG0527	K	HMG-box transcription factor	specific transcriptional repressor	None	mating-type m-specific polypeptide mc	None	None	None	None	None	None	None	None	None	0	-0.404
181.m08425	CNAG_00702	None	None	None	None	None	None	None	KOG4698	S	Uncharacterized conserved protein	conserved hypothetical protein	None	None	None	None	None	None	None	None	None	None	None	0	0.285
181.m08506	CNAG_00787	YNL297C	MON2	SPAC23D3.13c	None	orf19.4939	ca3709	IPF7880	KOG1848	S	Uncharacterized conserved protein	conserved hypothetical protein	Peripheral membrane protein with a role in endocytosis and vacuole integrity, interacts with Arl1p and localizes to the endosome; member of the Sec7p family of proteins	guanyl-nucleotide exchange factor (predicted)	unknown function	None	None	None	None	None	None	None	None	0	-0.23
163.m04765	CNAG_00906	None	None	SPCC14G10.02	None	None	None	None	KOG1791	S	Uncharacterized conserved protein	nucleolar protein	None	ribosome biogenesis protein Urb1	None	None	None	None	None	None	None	None	None	0	0.365
163.m03930	CNAG_00979	YLR411W	CTR3	SPCC1393.10	ctr4	None	None	None	KOG3386	P	Copper transporter	copper uptake transporter	High-affinity copper transporter of the plasma membrane, acts as a trimer; gene is disrupted by a Ty2 transposon insertion in many laboratory strains of S. cerevisiae	copper transporter complex subunit Ctr4	None	None	Cne_OsR-dw_2.0	None	Cne_FxR-dw_2.0	None	Cne_OxR-dw_2.0	None	Cne_CSR-dw_2.0	0	-2.331
163.m03860	CNAG_01019	YJR104C	SOD1	SPAC821.10c	sod1	orf19.2770.1	ca4120	SOD1	KOG0441	P	Cu2+/Zn2+ superoxide dismutase SOD1	Cu/Zn superoxide dismutase	Cytosolic superoxide dismutase; some mutations are analogous to those that cause ALS (amyotrophic lateral sclerosis) in humans	superoxide dismutase Sod1	Cu,Zn-superoxide dismutase	None	None	None	None	None	None	None	None	0	1.345
163.m03870	CNAG_01037	YPL164C	MLH3	None	None	orf19.7257	ca5372	MLH3	None	None	None	Mlh3p	Protein involved in DNA mismatch repair and crossing-over during meiotic recombination; forms a complex with Mlh1p; mammalian homolog is implicated mammalian microsatellite instability	None	DNA mismatch repair by homology	None	None	None	None	None	None	None	None	0	-0.313
163.m06183	CNAG_01121	None	None	None	None	None	None	None	KOG3644	T	Ligand-gated ion channel	conserved hypothetical protein	None	None	None	None	None	None	None	None	None	None	None	0	0.439
163.m06426	CNAG_01223	YJL079C	PRY1	None	None	orf19.7218	ca5344	PRY2	KOG3017	S	Defense-related protein containing SCP domain	conserved hypothetical protein	Protein of unknown function, has similarity to Pry2p and Pry3p and to the plant PR-1 class of pathogen related proteins	None	putative pathogen related proteins (by homology)	None	None	None	None	None	None	None	None	0	0.458
163.m06442	CNAG_01256	None	None	None	None	None	None	None	KOG1721	R	1 FOG: Zn-finger	conserved hypothetical protein	None	None	None	None	None	None	None	None	None	None	None	0	-0.348
163.m06447	CNAG_01262	YOR212W	STE4	SPBC32H8.07	git5	orf19.799	ca0438	STE4	KOG0286	R	G-protein beta subunit	G-protein beta subunit GPB1	G protein beta subunit, forms a dimer with Ste18p to activate the mating signaling pathway, forms a heterotrimer with Gpa1p and Ste18p to dampen signaling; may recruit Rho1p to the polarized growth site during mating; contains WD40 repeats	heterotrimeric G protein beta subunit Git5	GTP-binding protein beta subunit of the pheromone pathway, 5-prime end (by homology)	None	None	None	None	None	Cne_OxR-dw_2.0	None	Cne_OxSR-dw_2.0	0	0.333
163.m06489	CNAG_01314	YHR202W	None	SPBPB2B2.06c	None	orf19.5342	ca5500	IPF768	KOG4419	F	5' nucleotidase	vacuolar protein	None	phosphoprotein phosphatase (predicted)	unknown function	None	None	None	None	Cne_OxR-up_2.0	None	Cne_OxSR-up_2.0	None	0	-0.83
163.m06526	CNAG_01333	YGL021W	ALK1	SPAC23C4.03	None	None	None	None	KOG2464	D	Serine/threonine kinase (haspin family)	other/Haspin protein kinase	Protein kinase; accumulation and phosphorylation are periodic during the cell cycle; phosphorylated in response to DNA damage; contains characteristic motifs for degradation via the APC pathway; similar to Alk2p and to mammalian haspins	haspin related kinase	None	None	None	None	None	None	None	None	None	0	0.375
163.m06508	CNAG_01337	None	None	SPAC12B10.03	None	None	None	None	KOG2394	R	WD40 protein DMR-N9	WD-repeat protein	None	WD repeat protein, human WDR20 family	None	None	None	None	None	None	None	None	None	0	0.278
179.m00600	CNAG_01474	None	None	None	None	None	None	None	KOG1543	O	Cysteine proteinase Cathepsin L	conserved hypothetical protein	None	None	None	None	None	None	None	None	None	None	None	0	-0.304
179.m00623	CNAG_01475	None	None	None	None	orf19.4831	ca4749	IPF4481	None	None	None	sphingolipid C9-methyltransferase	None	None	unknown function	None	None	None	None	None	None	None	None	0	-0.084
179.m00088	CNAG_01577	YAL062W	GDH3	SPCC622.12c	None	orf19.4716	ca1579	GDH3	KOG2250	E	Glutamate/leucine/phenylalanine/valine dehydrogenases	glutamate dehydrogenase	NADP(+)-dependent glutamate dehydrogenase, synthesizes glutamate from ammonia and alpha-ketoglutarate; rate of alpha-ketoglutarate utilization differs from Gdh1p; expression regulated by nitrogen and carbon sources	NADP-specific glutamate dehydrogenase (predicted)	NADP-glutamate dehydrogenase (by homology)	Cne_OsR-up_2.0	None	None	None	None	None	Cne_OsSR-up_2.0	None	0	0.251
179.m00104	CNAG_01596	None	None	None	None	None	None	None	KOG2873	C	Ubiquinol cytochrome c reductase assembly protein CBP3	conserved hypothetical protein	None	None	None	None	None	None	None	None	Cne_OxR-dw_2.0	None	Cne_OxSR-dw_2.0	0	0.383
176.m02536	CNAG_01858	None	None	None	None	None	None	None	KOG0488	R	Transcription factor BarH and related HOX domain proteins	conserved hypothetical protein	None	None	None	None	None	None	None	None	None	None	None	0	-0.457
176.m02350	CNAG_01873	None	None	None	None	None	None	None	None	None	None	conserved hypothetical protein	None	None	None	None	None	None	None	None	None	None	None	0	-0.36
176.m02353	CNAG_01876	None	None	None	None	orf19.6624	ca4071	IPF2561	KOG1091	U	Ypt/Rab-specific GTPase-activating protein GYP6	TBC1 domain family member 5	None	None	unknown function	None	None	None	None	None	None	None	None	0	0.373
176.m02590	CNAG_01994	None	None	None	None	None	None	None	KOG2084	B	Predicted histone tail methylase containing SET domain	conserved hypothetical protein	None	None	None	None	None	None	None	None	None	None	None	0	-0.237
167.m03709	CNAG_02091	YKR048C	NAP1	SPCC364.06	nap1	orf19.7501	ca5845	NAP1	KOG1507	BD	Nucleosome assembly protein NAP-1	nucleosome assembly protein	Protein that interacts with mitotic cyclin Clb2p; required for the regulation of microtubule dynamics during mitosis; controls bud morphogenesis; involved in the transport of H2A and H2B histones to the nucleus; phosphorylated by CK2	nucleosome assembly protein Nap1 (predicted)	nucleosome assembly protein (by homology)	None	None	None	None	Cne_OxR-up_2.0	None	Cne_OxSR-up_2.0	None	0	0.343
167.m03576	CNAG_02099	YKL182W	FAS1	SPAC926.09c	fas1	orf19.979	ca5426	FAS1	None	None	None	fatty acid synthase beta subunit	Beta subunit of fatty acid synthetase, which catalyzes the synthesis of long-chain saturated fatty acids; contains acetyltransacylase, dehydratase, enoyl reductase, malonyl transacylase, and palmitoyl transacylase activities	fatty acid synthase beta subunit Fas1	Fatty-acyl-CoA synthase, beta chain.	None	None	None	Cne_FxR-dw_2.0	None	Cne_OxR-dw_2.0	None	None	0	0.453
167.m05919	CNAG_02314	None	None	None	None	None	None	None	KOG2181	K	LIM domain binding protein LDB1/NLI/CLIM	conserved hypothetical protein	None	None	None	None	None	None	Cne_FxR-dw_2.0	None	None	None	Cne_FxSR-dw_2.0	0	-0.358
167.m03357	CNAG_02337	YHR128W	FUR1	SPAC1B3.01c	None	orf19.2640	ca2069	FUR1	KOG4203	TZ	Armadillo/beta-Catenin/plakoglobin	uracil phosphoribosyltransferase 1	Uracil phosphoribosyltransferase, synthesizes UMP from uracil; involved in the pyrimidine salvage pathway	uracil phosphoribosyltransferase (predicted)	Uracil phosphoribosyltransferase (by homology)	None	None	None	None	None	None	None	None	0	0.585
167.m03351	CNAG_02349	None	None	None	None	None	None	None	KOG4341	R	F-box protein containing LRR	conserved hypothetical protein	None	None	None	None	None	None	None	Cne_OxR-up_2.0	None	Cne_OxSR-up_2.0	None	0	0.299
167.m03317	CNAG_02389	None	None	None	None	None	None	None	KOG0694	T	Serine/threonine protein kinase	AGC-group protein kinase	None	None	None	None	None	None	None	None	None	None	None	0	-0.411
167.m03673	CNAG_02540	None	None	None	None	None	None	None	KOG2533	G	Permease of the major facilitator superfamily	conserved hypothetical protein	None	None	None	None	Cne_OsR-dw_2.0	None	None	Cne_OxR-up_2.0	None	Cne_OxSR-up_2.0	Cne_OsSR-dw_2.0	0	0.435
167.m05754	CNAG_02552	None	None	None	None	None	None	None	KOG0523	G	Transketolase	transketolase	None	None	None	None	None	None	None	Cne_OxR-up_2.0	None	Cne_OxSR-up_2.0	None	0	-0.33
176.m02221	CNAG_02594	None	None	None	None	None	None	None	KOG0307	U	Vesicle coat complex COPII, subunit SEC31	conserved hypothetical protein	None	None	None	None	None	None	None	None	None	None	None	0	0.409
176.m02527	CNAG_02674	None	None	None	None	orf19.4046	ca2491	IPF7221	KOG0324	S	Uncharacterized conserved protein	dJ347H13.4	None	None	unknown function	None	None	None	None	None	None	None	None	0	-0.293
179.m00319	CNAG_02741	YKL134C	^OCT1	SPAC1F3.10c	40087	orf19.1195	ca1374	MIP1	KOG2090	O	Metalloendopeptidase family - mitochondrial intermediate peptidase	mitochondrial intermediate peptidase	Mitochondrial intermediate peptidase, cleaves N-terminal residues of a subset of proteins upon import, after their cleavage by mitochondrial processing peptidase (Mas1p-Mas2p); may contribute to mitochondrial iron homeostasis	mitochondrial intermediate peptidase Oct1 (predicted)	Mitochondrial intermediate peptidase (by homology)	None	None	None	None	None	None	None	None	0	0.399
179.m00343	CNAG_02775	None	None	None	None	None	None	None	None	None	None	conserved hypothetical protein	None	None	None	None	Cne_OsR-dw_2.0	None	None	None	Cne_OxR-dw_2.0	None	None	0	-2.069
179.m00499	CNAG_02958	None	None	None	None	orf19.4213	ca2922	FET31	KOG1263	Q	Multicopper oxidases	ferroxidase	None	None	cell surface ferroxidase (by homology)	None	Cne_OsR-dw_2.0	None	None	None	None	None	Cne_OsSR-dw_2.0	0	0.549
179.m00035	CNAG_03052	YBL056W	PTC3	SPCC1223.11	ptc2	orf19.2538	ca0047	PTC2	KOG0698	T	Serine/threonine protein phosphatase	PP2Cc protein phosphatase	Type 2C protein phosphatase; dephosphorylates Hog1p (see also Ptc2p) to limit maximal kinase activity induced by osmotic stress; dephosphorylates T169 phosphorylated Cdc28p (see also Ptc2p); role in DNA checkpoint inactivation	protein phosphatase 2C Ptc2	Protein phosphatase type 2C (by homology)	None	None	None	None	None	None	None	None	0	0.229
179.m00613	CNAG_03057	None	None	None	None	None	None	None	KOG1216	WV	von Willebrand factor and related coagulation proteins	conserved hypothetical protein	None	None	None	None	None	None	None	None	None	None	None	0	-0.319
179.m00011	CNAG_03081	YGL064C	MRH4	None	None	None	None	None	KOG0335	A	ATP-dependent RNA helicase	RNA helicase	Mitochondrial ATP-dependent RNA helicase of the DEAD-box family, plays an essential role in mitochondrial function	None	None	None	None	None	None	None	None	None	None	0	0.217
177.m03353	CNAG_03258	None	None	None	None	None	None	None	KOG0616	T	cAMP-dependent protein kinase catalytic subunit (PKA)	AGC-group protein kinase	None	None	None	None	None	None	None	None	None	None	None	0	0.277
177.m03471	CNAG_03315	YPR165W	RHO1	SPAC1F7.04	rho1	orf19.2843	ca2866	RHO1	KOG0393	R	Ras-related small GTPase, Rho type	Rho1 GTP-binding protein	GTP-binding protein of the rho subfamily of Ras-like proteins, involved in establishment of cell polarity; regulates protein kinase C (Pkc1p) and the cell wall synthesizing enzyme 1,3-beta-glucan synthase (Fks1p and Gsc2p)	Rho family GTPase Rho1	GTP-binding protein of the rho subfamily of ras-like proteins (by homology)	None	None	None	None	None	None	None	None	0	0.194
177.m03441	CNAG_03384	None	None	None	None	None	None	None	None	None	None	conserved hypothetical protein	None	None	None	None	None	None	None	None	None	None	None	0	-0.477
177.m03002	CNAG_03433	None	None	None	None	None	None	None	None	None	None	endo alpha-1,4 polygalactosaminidase precusor	None	None	None	None	None	None	None	None	None	None	None	0	0.445
177.m02973	CNAG_03465	None	None	None	None	None	None	None	KOG1263	Q	Multicopper oxidases	laccase	None	None	None	None	None	None	None	None	None	None	None	0	0.784
177.m03382	CNAG_03465	None	None	None	None	None	None	None	KOG1263	Q	Multicopper oxidases	laccase	None	None	None	None	None	None	None	None	None	None	None	0	1.046
177.m02915	CNAG_03532	YLL056C	None	SPBC2A9.02	None	None	None	None	KOG1502	V	Flavonol reductase/cinnamoyl-CoA reductase	3-beta hydroxysteroid dehydrogenase/isomerase	None	NAD dependent epimerase/dehydratase family protein	None	None	None	None	None	None	None	None	None	0	0.391
177.m03373	CNAG_03544	None	None	None	None	orf19.6607	ca3847	IPF7942	None	None	None	conserved hypothetical protein	None	None	NADH-ubiquinone oxidoreductase	None	None	None	None	None	Cne_OxR-dw_2.0	None	Cne_OxSR-dw_2.0	0	0.259
186.m03566	CNAG_03644	None	None	None	None	None	None	None	None	None	None	CAS3p	None	None	None	None	None	None	None	None	None	None	None	0	-0.461
186.m04041	CNAG_03734	None	None	None	None	None	None	None	KOG2748	B	Uncharacterized conserved protein, contains chromo domain	conserved hypothetical protein	None	None	None	None	None	None	None	None	None	None	None	0	-0.28
186.m03748	CNAG_03823	YOL133W	HRT1	SPAC23H4.18c	rbx1	orf19.233.1	None	None	KOG2930	O	SCF ubiquitin ligase, Rbx1 component	ubiquitin-protein ligase	RING finger containing subunit of Skp1-Cullin-F-box ubiquitin protein ligases (SCF); required for Gic2p, Far1p, Sic1p and Cln2p degradation; may tether Cdc34p (a ubiquitin conjugating enzyme or E2) and Cdc53p (a cullin) subunits of SCF	RING-box protein 1	None	None	None	None	None	None	None	None	None	0	0.289
186.m03767	CNAG_03842	None	None	None	None	None	None	None	None	None	None	conserved hypothetical protein	None	None	None	None	None	None	None	None	None	None	None	0	-0.411
186.m03770	CNAG_03844	None	None	None	None	None	None	None	None	None	None	nonselective cation channel	None	None	None	None	None	None	None	None	None	None	None	0	0.272
186.m03809	CNAG_03877	None	None	None	None	None	None	None	KOG2740	U	Clathrin-associated protein medium chain	adaptor complex subunit medium chain 3	None	None	None	None	None	None	None	None	None	None	None	0	0.304
186.m03829	CNAG_03901	YPL060W	LPE10	SPBC25H2.08c	mrs2	orf19.2597	ca2271	MRS2	KOG2662	P	Magnesium transporters: CorA family	magnesium ion transporter	Mitochondrial inner membrane magnesium transporter, involved in maintenance of magnesium concentrations inside mitochondria; indirectly affects splicing of group II introns; functionally and structurally related to Mrs2p	magnesium ion transporter Mrs2	Mitochondrial RNA splicing protein (by homology)	None	None	None	None	Cne_OxR-up_2.0	None	Cne_OxSR-up_2.0	None	0	-0.234
186.m03839	CNAG_03915	YHL026C	None	SPCC594.02c	None	None	None	None	None	None	None	conserved hypothetical protein	None	conserved fungal protein	None	None	None	None	None	None	None	None	None	0	-0.23
186.m03842	CNAG_03917	None	None	SPBC17G9.04c	nup85	None	None	None	KOG2271	YU	Nuclear pore complex component (sc Nup85)	conserved hypothetical protein	None	nucleoporin Nup85	None	None	None	None	None	None	None	None	None	0	-0.31
186.m03845	CNAG_03919	YDR511W	ACN9	SPBP23A10.03c	None	orf19.6328	ca3294	IPF5725	KOG4100	S	Uncharacterized conserved protein	acetate non-utilizing protein 9	Protein of the mitochondrial intermembrane space, required for acetate utilization and gluconeogenesis; has orthologs in higher eukaryotes	ACN9 family mitochondrial protein	unknown function	None	None	None	None	Cne_OxR-up_2.0	None	Cne_OxSR-up_2.0	None	0	0.283
186.m03849	CNAG_03921	None	None	None	None	None	None	None	None	None	None	conserved hypothetical protein	None	None	None	None	None	None	None	None	None	None	None	0	-0.326
186.m03856	CNAG_03929	YML038C	YMD8	SPAC22E12.01	None	orf19.6480	ca1995	IPF6612	KOG1443	S	Predicted integral membrane protein	Cas42p	Putative nucleotide sugar transporter, has similarity to Vrg4p	membrane transporter (predicted)	unknown function	None	None	None	None	Cne_OxR-up_2.0	None	Cne_OxSR-up_2.0	None	0	0.363
186.m03909	CNAG_03992	None	None	None	None	None	None	None	None	None	None	GTP-binding protein 1	None	None	None	None	Cne_OsR-dw_2.0	None	Cne_FxR-dw_2.0	Cne_OxR-up_2.0	None	Cne_OxSR-up_2.0	None	0	-0.326
186.m03911	CNAG_03994	YDR435C	PPM1	SPBP8B7.08c	None	orf19.6377	ca3541	IPF5425	KOG2918	O	Carboxymethyl transferase	leucine carboxyl methyltransferase 1	Carboxyl methyl transferase, methylates the C terminus of the protein phosphatase 2A catalytic subunit (Pph21p or Pph22p), which is important for complex formation with regulatory subunits	leucine carboxyl methyltransferase (predicted)	similar to Saccharomyces cerevisiae Ppm1p carboxy methyltransferase (by homology)	None	None	None	None	None	None	None	None	0	-0.185
186.m03914	CNAG_03996	YEL042W	GDA1	SPAC824.08	gda1	orf19.7394	ca5693	GDA1	KOG1385	F	Nucleoside phosphatase	guanosine-diphosphatase	Guanosine diphosphatase located in the Golgi, involved in the transport of GDP-mannose into the Golgi lumen by converting GDP to GMP after mannose is transferred its substrate	guanosine-diphosphatase Gda1	Golgi guanosine diphosphatase (by homology)	None	None	None	None	None	None	None	None	0	0.491
186.m03966	CNAG_04036	None	None	None	None	None	None	None	KOG0627	K	Heat shock transcription factor	conserved hypothetical protein	None	None	None	None	None	None	None	None	None	None	None	0	-0.268
186.m04003	CNAG_04074	YGL137W	SEC27	SPBC16C6.13c	sec27	orf19.3467	ca2033	SEC27	KOG0276	U	Vesicle coat complex COPI, beta' subunit	coatomer beta' subunit	Essential beta'-coat protein of the COPI coatomer, involved in ER-to-Golgi and Golgi-to-ER transport; contains WD40 domains that mediate cargo selective interactions; 45% sequence identity to mammalian beta'-COP	coatomer beta' subunit (predicted)	coatomer complex beta chain (beta -cop) of secretory pathway vesicles (by homology)	None	None	None	None	None	None	None	None	0	0.295
186.m04013	CNAG_04090	None	None	SPBC29B5.01	atf1	orf19.1032	ca1627	SKO1.3f	KOG1414	K	Transcriptional activator FOSB/c-Fos and related bZIP transcription factors	activating transcription factor 2	None	transcription factor Atf1	Cre-binding bzip protein, 3-prime end (by homology)	None	None	None	None	None	None	None	None	0	0.347
162.m02715	CNAG_04387	YPR082C	DIB1	SPCC16A11.05c	dim1	orf19.1975	ca0468	DIB1	KOG3414	AD	Component of the U4/U6.U5 snRNP/mitosis protein DIM1	pre-mRNA splicing factor	17-kDa component of the U4/U6aU5 tri-snRNP, plays an essential role in pre-mRNA splicing, orthologue of hDIM1, the human U5-specific 15-kDa protein	U4/U6 x U5 tri-snRNP complex subunit Dim1	Component of the U4/U6.U5 snRNP (by homology)	None	Cne_OsR-dw_2.0	None	None	None	None	None	Cne_OsSR-dw_2.0	0	-0.553
162.m02726	CNAG_04388	YHR008C	SOD2	SPAC1486.01	None	orf19.7111.1	None	None	KOG0876	P	Manganese superoxide dismutase	mitochondrial superoxide dismutase Sod2	Mitochondrial superoxide dismutase, protects cells against oxygen toxicity; phosphorylated	manganese superoxide dismutase (AF069292)	None	None	None	None	None	None	None	None	None	0	-0.543
162.m02662	CNAG_04448	YBR084C-A	RPL19A	SPCC1682.14	rpl1902	orf19.5904	ca6141	RPL19A	KOG1696	J	60s ribosomal protein L19	60S ribosomal protein L19	Protein component of the large (60S) ribosomal subunit, nearly identical to Rpl19Bp and has similarity to rat L19 ribosomal protein; rpl19a and rpl19b single null mutations result in slow growth, while the double null mutation is lethal	60S ribosomal protein L19B	Ribosomal protein L19.e (by homology)	None	None	None	None	None	Cne_OxR-dw_2.0	None	Cne_OxSR-dw_2.0	0	0.277
185.m02444	CNAG_04662	YPR135W	CTF4	SPAPB1E7.02c	mcl1	orf19.6247	ca0964	IPF9141	KOG1274	R	WD40 repeat protein	sepB	Chromatin-associated protein, required for sister chromatid cohesion; interacts with DNA polymerase alpha (Pol1p) and may link DNA synthesis to sister chromatid cohesion	DNA polymerase alpha accessory factor Mcl1	similar to Saccharomyces cerevisiae Ctf4p DNA-directed DNA polymerase alpha-binding protein (by homology)	None	None	None	None	None	None	None	None	0	-0.264
185.m02743	CNAG_04727	None	None	None	None	None	None	None	KOG4194	T	Membrane glycoprotein LIG-1	conserved hypothetical protein	None	None	None	None	Cne_OsR-dw_2.0	None	None	Cne_OxR-up_2.0	None	Cne_OxSR-up_2.0	Cne_OsSR-dw_2.0	0	-0.212
185.m02583	CNAG_04813	YHR026W	PPA1	SPAC2C4.13	vma16	orf19.4954	ca0512	VMA16	KOG0233	C	Vacuolar H+-ATPase V0 sector, subunit c''	hydrogen-transporting ATPase	Subunit c'' of the vacuolar ATPase, which functions in acidification of the vacuole; one of three proteolipid subunits of the V0 domain	V-type ATPase subunit c''	H+-ATPase 23 KD subunit, vacuolar (by homology)	None	None	None	None	None	None	None	None	0	-0.182
185.m02607	CNAG_04837	None	None	None	None	orf19.2315	ca3300	RTG3	KOG1318	K	Helix loop helix transcription factor EB	conserved hypothetical protein	None	None	Probable bHLH/zip transcription factor that regulates CIT2 gene expression (by homology)	None	None	None	None	None	None	None	None	0	0.422
184.m04981	CNAG_04946	None	None	None	None	None	None	None	KOG2820	R	FAD-dependent oxidoreductase	conserved hypothetical protein	None	None	None	None	None	None	None	None	None	None	None	0	-0.384
184.m04959	CNAG_04967	None	None	None	None	None	None	None	KOG0103	O	Molecular chaperones HSP105/HSP110/SSE1, HSP70 superfamily	conserved hypothetical protein	None	None	None	None	None	None	None	None	None	None	None	0	-0.248
184.m04872	CNAG_05066	None	None	None	None	None	None	None	KOG1721	R	1 FOG: Zn-finger	conserved hypothetical protein	None	None	None	None	None	None	None	None	None	None	None	0	-0.399
184.m05030	CNAG_05109	None	None	SPAC24C9.05c	mug70	orf19.5238	ca5008	IPF12577	None	None	None	CBS and PB1 domain-containing protein	None	conserved protein (fungal and plant)	unknown function	None	Cne_OsR-dw_2.0	None	Cne_FxR-dw_2.0	None	Cne_OxR-dw_2.0	None	Cne_CSR-dw_2.0	0	0.309
184.m04826	CNAG_05119	YKL174C	TPO5	None	None	orf19.151	ca0144	IPF19195.3f	KOG1289	E	Amino acid transporters	GabA permease	Protein involved in excretion of putrescine and spermidine; putative polyamine transporter in the Golgi or post-Golgi vesicles	None	putative amino acid or GABA permease, 3-prime end (by homology)	None	None	None	None	None	None	None	None	0	0.222
184.m04802	CNAG_05144	YNL036W	NCE103	None	None	orf19.1721	ca2796	IPF8405	KOG1578	P	Predicted carbonic anhydrase involved in protection against oxidative damage	carbonic anhydrase 2	Carbonic anhydrase; poorly transcribed under aerobic conditions and at an undetectable level under anaerobic conditions; involved in non-classical protein export pathway	None	similar to Saccharomyces cerevisiae Nce103p involved in non-classical protein export pathway (by homology)	None	None	None	None	Cne_OxR-up_2.0	None	Cne_OxSR-up_2.0	None	0	-3.205
184.m04793	CNAG_05155	YER075C	PTP3	SPAC26F1.10c	pyp1	orf19.7610	ca6009	IPF643	KOG0789	T	Protein tyrosine phosphatase	protein-tyrosine-phosphatase	Phosphotyrosine-specific protein phosphatase involved in the inactivation of mitogen-activated protein kinase (MAPK) during osmolarity sensing; dephosporylates Hog1p MAPK and regulates its localization; localized to the cytoplasm	tyrosine phosphatase Pyp1	similar to Saccharomyces cerevisiae Ptp3p protein tyrosine phosphatase (by homology)	None	None	None	None	None	None	None	None	0	0.397
184.m04765	CNAG_05191	YOR154W	SLP1	SPBC3E7.09	None	orf19.4738	ca1944	IPF10645	KOG1396	S	Uncharacterized conserved protein	conserved hypothetical protein	Integral membrane protein of unknown function; member of the SUN-like family of proteins	Sad1-UNC-like C-terminal	unknown function	None	None	Cne_FxR-up_2.0	None	None	None	Cne_FxSR-up_2.0	None	0	-0.316
184.m04759	CNAG_05195	YDL190C	UFD2	SPAC20H4.10	ufd2	orf19.5965	ca6091	UFD2	KOG2042	O	Ubiquitin fusion degradation protein-2	ubiquitin fusion degradation protein-2	Ubiquitin chain assembly factor (E4) that cooperates with a ubiquitin-activating enzyme (E1), a ubiquitin-conjugating enzyme (E2), and a ubiquitin protein ligase (E3) to conjugate ubiquitin to substrates; also functions as an E3	ubiquitin-protein ligase E4 (predicted)	Ubiquitin fusion degradation protein 2 (by homology)	None	None	None	None	None	None	None	None	0	0.307
184.m04720	CNAG_05243	YGR194C	XKS1	SPCPJ732.02c	None	orf19.1290	None	None	KOG2531	G	Sugar (pentulose and hexulose) kinases	xylulokinase	Xylulokinase, converts D-xylulose and ATP to xylulose 5-phosphate and ADP; rate limiting step in fermentation of xylulose; required for xylose fermentation by recombinant S. cerevisiae strains	xylulose kinase (predicted)	None	None	None	None	None	None	None	None	None	0	0.12
184.m05024	CNAG_05248	YKL135C	APL2	SPBC947.02	apl2	orf19.231	ca0321	APL2	KOG1061	U	Vesicle coat complex AP-1/AP-2/AP-4, beta subunit	clathrin binding protein	Beta-adaptin, large subunit of the clathrin-associated protein (AP-1) complex; binds clathrin; involved in clathrin-dependent Golgi protein sorting	AP-1 adaptor complex subunit Apl2 (predicted)	AP-1 complex subunit, beta1-adaptin (by homology)	None	None	None	None	None	Cne_OxR-dw_2.0	None	Cne_OxSR-dw_2.0	0	-0.218
184.m05134	CNAG_05259	None	None	None	None	None	None	None	None	None	None	conserved hypothetical protein	None	None	None	None	None	None	None	None	None	None	None	0	-0.393
184.m04690	CNAG_05273	YMR009W	ADI1	SPBC887.01	None	orf19.2306	ca3311	IPF8809	KOG2107	S	Uncharacterized conserved protein, contains double-stranded beta-helix domain	1,2-dihydroxy-3-keto-5-methylthiopentene dioxygenase	Acireductone dioxygenease involved in the methionine salvage pathway; ortholog of human MTCBP-1; transcribed with YMR010W and regulated post-transcriptionally by RNase III (Rnt1p) cleavage; ADI1 mRNA is induced in heat shock conditions	acireductone dioxygenase family	unknown function	None	None	None	None	None	Cne_OxR-dw_2.0	None	Cne_OxSR-dw_2.0	0	-0.309
184.m04363	CNAG_05373	None	None	None	None	None	None	None	KOG3949	BK	RNA polymerase II elongator complex, subunit ELP4	conserved hypothetical protein	None	None	None	None	None	None	None	None	None	None	None	0	0.356
184.m04415	CNAG_05429	None	None	None	None	None	None	None	KOG4534	S	Uncharacterized conserved protein	conserved hypothetical protein	None	None	None	None	None	None	None	None	None	None	None	0	0.375
184.m04563	CNAG_05586	None	None	None	None	None	None	None	KOG3656	R	FOG: 7 transmembrane receptor	conserved hypothetical protein	None	None	None	None	None	None	None	None	None	None	None	0	-0.363
180.m00280	CNAG_05885	None	None	None	None	None	None	None	None	None	None	conserved hypothetical protein	None	None	None	None	None	None	None	None	None	None	None	0	-0.372
180.m00286	CNAG_05893	None	None	None	None	None	None	None	KOG1257	C	NADP+-dependent malic enzyme	conserved hypothetical protein	None	None	None	None	None	None	None	None	None	None	None	0	0.259
180.m00269	CNAG_05931	YJL059W	YHC3	SPAC607.09c	btn1	orf19.4059	ca1483	YHC3	KOG3880	R	Predicted small molecule transporter involved in cellular pH homeostasis (Batten disease protein in human)	basic amino acid transporter	Vacuolar membrane protein involved in the ATP-dependent transport of arginine into the vacuole and possibly in balancing ion homeostasis; homolog of human CLN3 involved in Batten disease (juvenile onset neuronal ceroid lipofuscinosis)	battenin CLN3 family protein	involved in cellular pH homeostasis (by homology)	None	None	None	None	None	None	None	None	0	-0.172
180.m00005	CNAG_05976	YOR310C	NOP58	SPAC23G3.06	None	orf19.1199	ca1438	NOP58	KOG2572	AJ	Ribosome biogenesis protein - Nop58p/Nop5p	SnoRNA binding domain containing protein	Protein involved in pre-rRNA processing, 18S rRNA synthesis, and snoRNA synthesis; component of the small subunit processome complex, which is required for processing of pre-18S rRNA	U3 snoRNP protein Nop58 (predicted)	nucleolar protein required for pre-18S rRNA processing	Cne_OsR-up_2.0	None	None	None	None	Cne_OxR-dw_2.0	Cne_OsSR-up_2.0	Cne_OxSR-dw_2.0	0	-0.338
183.m01822	CNAG_06290	YLR081W	GAL2	None	None	None	None	None	KOG0254	R	Predicted transporter (major facilitator superfamily)	sugar transporter	Galactose permease, required for utilization of galactose; also able to transport glucose	None	None	None	Cne_OsR-dw_2.0	None	Cne_FxR-dw_2.0	None	None	None	None	0	-0.442
183.m01839	CNAG_06322	None	None	None	None	None	None	None	KOG2747	B	Histone acetyltransferase (MYST family)	conserved hypothetical protein	None	None	None	None	None	None	None	None	None	None	None	0	0.333
183.m01655	CNAG_06356	YKL027W	None	SPAC1A6.10	None	orf19.2115	ca2730	IPF10325	KOG2018	O	Predicted dinucleotide-utilizing enzyme involved in molybdopterin and thiamine biosynthesis	mitochondrial protein	None	Moeb/ThiF domain	molybdopterin-converting factor by homology	None	None	None	None	None	Cne_OxR-dw_2.0	None	Cne_OxSR-dw_2.0	0	0.189
183.m01724	CNAG_06433	YBR222C	PCS60	SPCC1827.03c	None	None	None	None	KOG1176	I	Acyl-CoA synthetase	AMP binding protein	Peroxisomal AMP-binding protein, localizes to both the peroxisomal peripheral membrane and matrix, expression is highly inducible by oleic acid, similar to E. coli long chain acyl-CoA synthetase	acetyl-CoA ligase (predicted)	None	None	None	None	None	None	None	None	None	0	-0.412
180.m00460	CNAG_06537	None	None	None	None	None	None	None	None	None	None	monocarboxylic acid transporter	None	None	None	None	None	None	None	None	None	None	None	0	-0.315
180.m00223	CNAG_06560	None	None	None	None	None	None	None	KOG1515	V	Arylacetamide deacetylase	esterase	None	None	None	None	None	Cne_FxR-up_2.0	None	Cne_OxR-up_2.0	None	None	None	0	0.256
180.m02954	CNAG_06596	None	None	None	None	None	None	None	None	None	None	conserved hypothetical protein	None	None	None	None	None	None	None	None	None	None	None	0	0.393
180.m00165	CNAG_06668	YNR018W	AIM38	None	None	None	None	None	None	None	None	mitochondrial protein	Putative protein of unknown function; non-tagged protein is detected in purified mitochondria; null mutant displays decreased frequency of mitochondrial genome loss (petite formation) and severe growth defect in minimal glycerol media	None	None	None	None	None	Cne_FxR-dw_2.0	None	None	None	Cne_FxSR-dw_2.0	0	0.538
186.m03498	CNAG_06717	None	None	SPAC1A6.09c	lag1	orf19.7354	ca5652	IPF19815	KOG1607	U	Protein transporter of the TRAM (translocating chain-associating membrane) superfamily	longevity-assurance protein	None	sphingosine N-acyltransferase Lag1	longevity-assurance protein (by homology)	None	None	None	None	None	None	None	None	0	-0.365
186.m03441	CNAG_06769	YOR330C	MIP1	SPCC24B10.22	None	orf19.3431	ca4033	IPF19795	KOG3657	L	Mitochondrial DNA polymerase gamma, catalytic subunit	gamma DNA-directed DNA polymerase	Catalytic subunit of the mitochondrial DNA polymerase; conserved C-terminal segment is required for the maintenance of mitochondrial genome.	mitochondrial DNA polymerase gamma catalytic subunit	similar to Saccharomyces cerevisiae Mip1p DNA-directed DNA polymerase gamma catalytic subunit, mitochondrial (by homology)	None	None	None	None	None	None	None	None	0	-0.306
177.m02858	CNAG_06968	None	None	None	None	None	None	None	KOG1808	R	AAA ATPase containing von Willebrand factor type A (vWA) domain	hypothetical protein	None	None	None	None	None	None	None	None	Cne_OxR-dw_2.0	None	Cne_OxSR-dw_2.0	0	0.154
181.m07973	CNAG_07330	None	None	None	None	None	None	None	KOG0099	T	G protein subunit Galphas, small G protein superfamily	conserved hypothetical protein	None	None	None	None	None	None	None	None	None	None	None	0	-0.381
163.m06225	CNAG_07422	None	None	None	None	None	None	None	KOG1225	TW	Teneurin-1 and related extracellular matrix proteins, contain EGF-like repeats	delayed-type hypersensitivity antigen	None	None	None	None	None	None	None	None	None	None	None	0	0.241
186.m03496	CNAG_07465	None	None	None	None	None	None	None	KOG4168	K	Predicted RNA polymerase III subunit C17	conserved hypothetical protein	None	None	None	None	None	None	None	None	Cne_OxR-dw_2.0	None	Cne_OxSR-dw_2.0	0	-0.449
176.m02252	CNAG_07558	YKL117W	SBA1	SPAC9E9.13	wos2	orf19.5749	ca0896	SBA1	KOG3158	O	HSP90 co-chaperone p23	wos2 protein	Co-chaperone that binds to and regulates Hsp90 family chaperones; important for pp60v-src activity in yeast; homologous to the mammalian p23 proteins and like p23 can regulate telomerase activity	p23 homolog	Hsp90 (Ninety) Associated Co-chaperone (by homology)	None	None	None	None	None	Cne_OxR-dw_2.0	None	Cne_OxSR-dw_2.0	0	0.163
167.m05803	CNAG_07625	YGR266W	None	None	None	orf19.3983	ca3406	IPF9711	None	None	None	plasma membrane protein	None	None	unknown function	None	None	None	None	None	None	None	None	0	-0.287
184.m04760	CNAG_07641	None	None	None	None	None	None	None	KOG0254	R	Predicted transporter (major facilitator superfamily)	monosaccharide transporter	None	None	None	None	None	None	None	None	None	None	None	0	-0.348
180.m00013	CNAG_07700	None	None	None	None	None	None	None	KOG0017	R	FOG: Transposon-encoded proteins with TYA, reverse transcriptase, integrase domains in various combinations	conserved hypothetical protein	None	None	None	None	None	None	None	None	None	None	None	0	-0.332
179.m00044	CNAG_07789	None	None	None	None	None	None	None	KOG0351	L	ATP-dependent DNA helicase	conserved hypothetical protein	None	None	None	None	None	None	None	None	None	None	None	0	-0.724
184.m04961	CNAG_07798	None	None	None	None	None	None	None	None	None	None	amidohydrolase 3	None	None	None	None	None	None	None	None	None	None	None	0	-0.426
184.m04644	CNAG_07830	None	None	None	None	None	None	None	None	None	None	conserved hypothetical protein	None	None	None	None	None	None	None	None	None	None	None	0	0.479
184.m04352	CNAG_07871	YPL031C	PHO85	SPCC16C4.11	pef1	orf19.6846	ca4448	PHO85	KOG0594	R	Protein kinase PCTAIRE and related kinases	CMGC/CDK protein kinase	Cyclin-dependent kinase, with ten cyclin partners; involved in regulating the cellular response to nutrient levels and environmental conditions and progression through the cell cycle	Pho85/PhoA-like cyclin-dependent kinase Pef1	Negative regulator of PHO system	None	None	None	None	None	None	None	None	0	-0.144
162.m02197	None	None	None	None	None	None	None	None	None	None	None	None	None	None	None	None	None	None	None	None	None	None	None	0	0.331
162.m02497	None	None	None	None	None	None	None	None	None	None	None	None	None	None	None	None	None	None	None	None	None	None	None	0	-0.409
162.m02604	None	None	None	None	None	None	None	None	None	None	None	None	None	None	None	None	None	None	None	None	None	None	None	0	-0.567
164.m02533	None	None	None	None	None	None	None	None	None	None	None	None	None	None	None	None	None	None	None	None	None	None	None	0	-0.679
176.m02377	None	None	None	None	None	None	None	None	None	None	None	None	None	None	None	None	None	None	None	None	None	None	None	0	-0.741
176.m02416	None	None	None	None	None	None	None	None	None	None	None	None	None	None	None	None	None	None	None	None	None	None	None	0	-0.408
179.m00718	None	None	None	None	None	None	None	None	None	None	None	None	None	None	None	None	None	None	None	None	None	None	None	0	-0.423
181.m08012	None	None	None	None	None	None	None	None	None	None	None	None	None	None	None	None	None	None	None	None	None	None	None	0	-0.31
181.m08050	None	None	None	None	None	None	None	None	None	None	None	None	None	None	None	None	None	None	None	Cne_OxR-up_2.0	None	Cne_OxSR-up_2.0	None	0	2.195
183.m01621	None	None	None	None	None	None	None	None	None	None	None	None	None	None	None	None	None	None	None	None	None	None	None	0	0.525
184.m04687	None	None	None	None	None	None	None	None	None	None	None	None	None	None	None	None	None	None	None	None	None	None	None	0	-0.274
184.m05170	None	None	None	None	None	None	None	None	None	None	None	None	None	None	None	None	None	None	None	None	None	None	None	0	-0.341
185.m02740	None	None	None	None	None	None	None	None	None	None	None	None	None	None	None	None	None	None	None	None	None	None	None	0	-0.379

## Sheet: CAN2 BCS Cu ANOVA
Gene ID/ name									Biological function							Stress Response Genes of S. cerevisiae								Stress Response Genes of S. pombe								Stress Response Genes of C. albicans (Enjalbert et al., 2003)								Stress Response Genes of C. albicans (Enjalbert et al., 2006)
C.neo (JEC21) ID	C.neo (H99) ID	Sce ID	Sce_Gene (SGD)	Spo ID	Spo_Gene (GeneDB)	Cal ID (SGTC)	Cal ID (CYGD)	Cal_Gene (CandiaDB)	KOGs ID	KOGs Catagory	KOGs Description	Cn.H99.v2 Description	Sce_Description (SGD)	Spo_Description (GeneDB)	Cal_Description (CandiaDB)	Sce_OS-up_2.0 (Gasch-00)	Sce_OS-dw_2.0 (Gasch-00)	Sce_XS-up_2.0 (Gasch-00)	Sce_XS-dw_2.0 (Gasch-00)	Sce_HS-up_2.0 (Gasch-00)	Sce_HS-dw_2.0 (Gasch-00)	Sce_SSR-up_2.0 (Gasch-00, Re-exam)	Sce_SSR-dw_2.0 (Gasch-00, Re-exam)	Spo_OS-up_2.0 (Chen-03)	Spo_OS-dw_2.0 (Chen-03)	Spo_XS-up_2.0 (Chen-03)	Spo_XS-dw_2.0 (Chen-03)	Spo_Cd-up_2.0 (Chen-03)	Spo_Cd-dw_2.0 (Chen-03)	Spo_SSR-up_2.0 (Chen-03)	Spo_SSR-dw_2.0 (Chen-03)	Cal_OS-up (Enjalbert-03)	Cal_OS-dw (Enjalbert-03)	Cal_XS-up (Enjalbert-03)	Cal_XS-dw (Enjalbert-03)	Cal_HS-up (Enjalbert-03)	Cal_HS-dw (Enjalbert-03)	Cal_SSR-up (Enjalbert-03)	Cal_SSR-dw (Enjalbert-03)	Cal_OS-up_1.5 (Enjalbert-06)	Cal_OS-dw_1.5 (Enjalbert-06)	Cal_OS-up_2.0 (Enjalbert-06)	Cal_OS-dw_2.0 (Enjalbert-06)	Cal_XS-up_1.5 (Enjalbert-06)	Cal_XS-dw_1.5 (Enjalbert-06)	Cal_XS-up_2.0 (Enjalbert-06)	Cal_XS-dw_2.0 (Enjalbert-06)	Cal_Cd-up_1.5 (Enjalbert-06)	Cal_Cd-dw_1.5 (Enjalbert-06)
181.m07807	CNAG_00027	None	None	None	None	None	None	None	None	None	None	transcriptional activator	None	None	None	None	None	None	None	None	None	None	None	None	None	None	None	None	None	None	None	None	None	None	None	None	None	None	None	None	None	None	None	None	None	None	None	None	None
181.m07827	CNAG_00054	None	None	None	None	None	None	None	None	None	None	DUF1264 domain-containing protein	None	None	None	None	None	None	None	None	None	None	None	None	None	None	None	None	None	None	None	None	None	None	None	None	None	None	None	None	None	None	None	None	None	None	None	None	None
181.m07930	CNAG_00165	YLR017W	MEU1	SPAC16C9.02c	None	orf19.6938	ca4708	MEU1	KOG3985	F	Methylthioadenosine phosphorylase MTAP	5'-methylthioadenosine phosphorylase	Methylthioadenosine phosphorylase (MTAP), catalyzes the initial step in the methionine salvage pathway; affects polyamine biosynthesis through regulation of ornithine decarboxylase (Spe1p) activity; regulates ADH2 gene expression	S-methyl-5-thioadenosine phosphorylase (predicted)	regulator of ADH2 expression (by homology)	None	None	None	Sce_XS-dw_2.0	None	Sce_HS-dw_2.0	None	None	None	None	None	Spo_XS-dw_2.0	None	Spo_Cd-dw_2.0	None	None	None	None	None	None	None	None	None	None	None	None	None	None	None	None	None	None	Cal_Cd-up_1.5	None
181.m07936	CNAG_00174	None	None	None	None	None	None	None	KOG1198	CR	Zinc-binding oxidoreductase	conserved hypothetical protein	None	None	None	None	None	None	None	None	None	None	None	None	None	None	None	None	None	None	None	None	None	None	None	None	None	None	None	None	None	None	None	None	None	None	None	None	None
184.m04432	CNAG_00306	None	None	None	None	None	None	None	KOG1836	W	Extracellular matrix glycoprotein Laminin subunits alpha and gamma	conserved hypothetical protein	None	None	None	None	None	None	None	None	None	None	None	None	None	None	None	None	None	None	None	None	None	None	None	None	None	None	None	None	None	None	None	None	None	None	None	None	None
181.m08254	CNAG_00515	None	None	None	None	None	None	None	KOG0023	Q	Alcohol dehydrogenase, class V	mannitol dehydrogenase	None	None	None	None	None	None	None	None	None	None	None	None	None	None	None	None	None	None	None	None	None	None	None	None	None	None	None	None	None	None	None	None	None	None	None	None	None
181.m08783	CNAG_00542	None	None	None	None	None	None	None	KOG2614	CR	Kynurenine 3-monooxygenase and related flavoprotein monooxygenases	conserved hypothetical protein	None	None	None	None	None	None	None	None	None	None	None	None	None	None	None	None	None	None	None	None	None	None	None	None	None	None	None	None	None	None	None	None	None	None	None	None	None
181.m08356	CNAG_00627	None	None	SPBC23G7.09	matmc_2	None	None	None	KOG0527	K	HMG-box transcription factor	specific transcriptional repressor	None	mating-type m-specific polypeptide mc	None	None	None	None	None	None	None	None	None	None	None	None	None	None	None	None	None	None	None	None	None	None	None	None	None	None	None	None	None	None	None	None	None	None	None
181.m08425	CNAG_00702	None	None	None	None	None	None	None	KOG4698	S	Uncharacterized conserved protein	conserved hypothetical protein	None	None	None	None	None	None	None	None	None	None	None	None	None	None	None	None	None	None	None	None	None	None	None	None	None	None	None	None	None	None	None	None	None	None	None	None	None
181.m08506	CNAG_00787	YNL297C	MON2	SPAC23D3.13c	None	orf19.4939	ca3709	IPF7880	KOG1848	S	Uncharacterized conserved protein	conserved hypothetical protein	Peripheral membrane protein with a role in endocytosis and vacuole integrity, interacts with Arl1p and localizes to the endosome; member of the Sec7p family of proteins	guanyl-nucleotide exchange factor (predicted)	unknown function	None	None	None	None	None	None	None	None	None	None	None	None	None	None	None	None	None	None	None	None	None	None	None	None	None	None	None	None	None	None	None	None	None	None
163.m04765	CNAG_00906	None	None	SPCC14G10.02	None	None	None	None	KOG1791	S	Uncharacterized conserved protein	nucleolar protein	None	ribosome biogenesis protein Urb1	None	None	None	None	None	None	None	None	None	None	None	None	None	None	None	None	None	None	None	None	None	None	None	None	None	None	None	None	None	None	None	None	None	None	None
163.m03930	CNAG_00979	YLR411W	CTR3	SPCC1393.10	ctr4	None	None	None	KOG3386	P	Copper transporter	copper uptake transporter	High-affinity copper transporter of the plasma membrane, acts as a trimer; gene is disrupted by a Ty2 transposon insertion in many laboratory strains of S. cerevisiae	copper transporter complex subunit Ctr4	None	None	None	None	None	None	None	None	None	None	None	None	None	None	None	None	None	None	None	None	None	None	None	None	None	None	None	None	None	None	None	None	None	None	None
163.m03860	CNAG_01019	YJR104C	SOD1	SPAC821.10c	sod1	orf19.2770.1	ca4120	SOD1	KOG0441	P	Cu2+/Zn2+ superoxide dismutase SOD1	Cu/Zn superoxide dismutase	Cytosolic superoxide dismutase; some mutations are analogous to those that cause ALS (amyotrophic lateral sclerosis) in humans	superoxide dismutase Sod1	Cu,Zn-superoxide dismutase	None	None	Sce_XS-up_2.0	None	None	None	None	None	None	None	Spo_XS-up_2.0	None	None	None	None	None	None	None	None	None	None	None	None	None	None	None	None	None	None	None	None	None	None	None
163.m03870	CNAG_01037	YPL164C	MLH3	None	None	orf19.7257	ca5372	MLH3	None	None	None	Mlh3p	Protein involved in DNA mismatch repair and crossing-over during meiotic recombination; forms a complex with Mlh1p; mammalian homolog is implicated mammalian microsatellite instability	None	DNA mismatch repair by homology	None	None	None	None	Sce_HS-up_2.0	None	None	None	None	None	None	None	None	None	None	None	None	None	None	None	None	None	None	None	None	None	None	None	None	None	None	None	None	None
163.m06183	CNAG_01121	None	None	None	None	None	None	None	KOG3644	T	Ligand-gated ion channel	conserved hypothetical protein	None	None	None	None	None	None	None	None	None	None	None	None	None	None	None	None	None	None	None	None	None	None	None	None	None	None	None	None	None	None	None	None	None	None	None	None	None
163.m06426	CNAG_01223	YJL079C	PRY1	None	None	orf19.7218	ca5344	PRY2	KOG3017	S	Defense-related protein containing SCP domain	conserved hypothetical protein	Protein of unknown function, has similarity to Pry2p and Pry3p and to the plant PR-1 class of pathogen related proteins	None	putative pathogen related proteins (by homology)	None	None	None	None	None	None	None	None	None	None	None	None	None	None	None	None	None	None	None	None	None	None	None	None	None	None	None	None	None	Cal_XS-dw_1.5	None	Cal_XS-dw_2.0	None	None
163.m06442	CNAG_01256	None	None	None	None	None	None	None	KOG1721	R	1 FOG: Zn-finger	conserved hypothetical protein	None	None	None	None	None	None	None	None	None	None	None	None	None	None	None	None	None	None	None	None	None	None	None	None	None	None	None	None	None	None	None	None	None	None	None	None	None
163.m06447	CNAG_01262	YOR212W	STE4	SPBC32H8.07	git5	orf19.799	ca0438	STE4	KOG0286	R	G-protein beta subunit	G-protein beta subunit GPB1	G protein beta subunit, forms a dimer with Ste18p to activate the mating signaling pathway, forms a heterotrimer with Gpa1p and Ste18p to dampen signaling; may recruit Rho1p to the polarized growth site during mating; contains WD40 repeats	heterotrimeric G protein beta subunit Git5	GTP-binding protein beta subunit of the pheromone pathway, 5-prime end (by homology)	None	None	None	Sce_XS-dw_2.0	None	Sce_HS-dw_2.0	None	None	Spo_OS-up_2.0	None	Spo_XS-up_2.0	None	Spo_Cd-up_2.0	None	Spo_CESR-up	None	None	None	None	None	None	None	None	None	None	None	None	None	None	None	None	None	None	None
163.m06489	CNAG_01314	YHR202W	None	SPBPB2B2.06c	None	orf19.5342	ca5500	IPF768	KOG4419	F	5' nucleotidase	vacuolar protein	None	phosphoprotein phosphatase (predicted)	unknown function	None	None	None	None	Sce_HS-up_2.0	None	None	None	None	Spo_OS-dw_2.0	None	None	Spo_Cd-up_2.0	None	None	None	None	None	None	None	None	None	None	None	None	None	None	None	None	None	None	None	None	None
163.m06526	CNAG_01333	YGL021W	ALK1	SPAC23C4.03	None	None	None	None	KOG2464	D	Serine/threonine kinase (haspin family)	other/Haspin protein kinase	Protein kinase; accumulation and phosphorylation are periodic during the cell cycle; phosphorylated in response to DNA damage; contains characteristic motifs for degradation via the APC pathway; similar to Alk2p and to mammalian haspins	haspin related kinase	None	None	Sce_OS-dw_2.0	None	Sce_XS-dw_2.0	None	None	None	None	None	None	None	None	None	None	None	None	None	None	None	None	None	None	None	None	None	None	None	None	None	None	None	None	None	None
163.m06508	CNAG_01337	None	None	SPAC12B10.03	None	None	None	None	KOG2394	R	WD40 protein DMR-N9	WD-repeat protein	None	WD repeat protein, human WDR20 family	None	None	None	None	None	None	None	None	None	None	None	None	None	None	None	None	None	None	None	None	None	None	None	None	None	None	None	None	None	None	None	None	None	None	None
179.m00600	CNAG_01474	None	None	None	None	None	None	None	KOG1543	O	Cysteine proteinase Cathepsin L	conserved hypothetical protein	None	None	None	None	None	None	None	None	None	None	None	None	None	None	None	None	None	None	None	None	None	None	None	None	None	None	None	None	None	None	None	None	None	None	None	None	None
179.m00623	CNAG_01475	None	None	None	None	orf19.4831	ca4749	IPF4481	None	None	None	sphingolipid C9-methyltransferase	None	None	unknown function	None	None	None	None	None	None	None	None	None	None	None	None	None	None	None	None	None	None	None	None	None	None	None	None	None	None	None	None	None	Cal_XS-dw_1.5	None	None	None	None
179.m00088	CNAG_01577	YAL062W	GDH3	SPCC622.12c	None	orf19.4716	ca1579	GDH3	KOG2250	E	Glutamate/leucine/phenylalanine/valine dehydrogenases	glutamate dehydrogenase	NADP(+)-dependent glutamate dehydrogenase, synthesizes glutamate from ammonia and alpha-ketoglutarate; rate of alpha-ketoglutarate utilization differs from Gdh1p; expression regulated by nitrogen and carbon sources	NADP-specific glutamate dehydrogenase (predicted)	NADP-glutamate dehydrogenase (by homology)	None	None	None	None	Sce_HS-up_2.0	None	None	None	None	None	Spo_XS-up_2.0	None	Spo_Cd-up_2.0	None	None	None	None	None	Cal_XS-up	None	None	Cal_HS-dw	Cal_SSR.XS-up	Cal_SSR.HS-dw	None	Cal_OS-dw_1.5	None	None	None	None	None	None	None	None
179.m00104	CNAG_01596	None	None	None	None	None	None	None	KOG2873	C	Ubiquinol cytochrome c reductase assembly protein CBP3	conserved hypothetical protein	None	None	None	None	None	None	None	None	None	None	None	None	None	None	None	None	None	None	None	None	None	None	None	None	None	None	None	None	None	None	None	None	None	None	None	None	None
176.m02536	CNAG_01858	None	None	None	None	None	None	None	KOG0488	R	Transcription factor BarH and related HOX domain proteins	conserved hypothetical protein	None	None	None	None	None	None	None	None	None	None	None	None	None	None	None	None	None	None	None	None	None	None	None	None	None	None	None	None	None	None	None	None	None	None	None	None	None
176.m02350	CNAG_01873	None	None	None	None	None	None	None	None	None	None	conserved hypothetical protein	None	None	None	None	None	None	None	None	None	None	None	None	None	None	None	None	None	None	None	None	None	None	None	None	None	None	None	None	None	None	None	None	None	None	None	None	None
176.m02353	CNAG_01876	None	None	None	None	orf19.6624	ca4071	IPF2561	KOG1091	U	Ypt/Rab-specific GTPase-activating protein GYP6	TBC1 domain family member 5	None	None	unknown function	None	None	None	None	None	None	None	None	None	None	None	None	None	None	None	None	None	None	None	None	None	None	None	None	None	None	None	None	None	None	None	None	None	None
176.m02590	CNAG_01994	None	None	None	None	None	None	None	KOG2084	B	Predicted histone tail methylase containing SET domain	conserved hypothetical protein	None	None	None	None	None	None	None	None	None	None	None	None	None	None	None	None	None	None	None	None	None	None	None	None	None	None	None	None	None	None	None	None	None	None	None	None	None
167.m03709	CNAG_02091	YKR048C	NAP1	SPCC364.06	nap1	orf19.7501	ca5845	NAP1	KOG1507	BD	Nucleosome assembly protein NAP-1	nucleosome assembly protein	Protein that interacts with mitotic cyclin Clb2p; required for the regulation of microtubule dynamics during mitosis; controls bud morphogenesis; involved in the transport of H2A and H2B histones to the nucleus; phosphorylated by CK2	nucleosome assembly protein Nap1 (predicted)	nucleosome assembly protein (by homology)	None	None	None	Sce_XS-dw_2.0	None	None	None	None	None	None	None	None	None	None	None	None	None	None	None	None	None	None	None	None	None	None	None	None	None	None	None	None	None	None
167.m03576	CNAG_02099	YKL182W	FAS1	SPAC926.09c	fas1	orf19.979	ca5426	FAS1	None	None	None	fatty acid synthase beta subunit	Beta subunit of fatty acid synthetase, which catalyzes the synthesis of long-chain saturated fatty acids; contains acetyltransacylase, dehydratase, enoyl reductase, malonyl transacylase, and palmitoyl transacylase activities	fatty acid synthase beta subunit Fas1	Fatty-acyl-CoA synthase, beta chain.	None	None	None	None	None	None	None	None	None	None	None	None	None	None	None	None	None	Cal_OS-dw	None	None	None	None	None	Cal_SSR.OS-dw	None	Cal_OS-dw_1.5	None	None	None	None	None	None	None	None
167.m05919	CNAG_02314	None	None	None	None	None	None	None	KOG2181	K	LIM domain binding protein LDB1/NLI/CLIM	conserved hypothetical protein	None	None	None	None	None	None	None	None	None	None	None	None	None	None	None	None	None	None	None	None	None	None	None	None	None	None	None	None	None	None	None	None	None	None	None	None	None
167.m03357	CNAG_02337	YHR128W	FUR1	SPAC1B3.01c	None	orf19.2640	ca2069	FUR1	KOG4203	TZ	Armadillo/beta-Catenin/plakoglobin	uracil phosphoribosyltransferase 1	Uracil phosphoribosyltransferase, synthesizes UMP from uracil; involved in the pyrimidine salvage pathway	uracil phosphoribosyltransferase (predicted)	Uracil phosphoribosyltransferase (by homology)	None	None	None	Sce_XS-dw_2.0	None	Sce_HS-dw_2.0	None	None	None	None	None	None	None	None	None	None	None	None	None	None	None	None	None	None	None	None	None	None	None	None	None	None	None	None
167.m03351	CNAG_02349	None	None	None	None	None	None	None	KOG4341	R	F-box protein containing LRR	conserved hypothetical protein	None	None	None	None	None	None	None	None	None	None	None	None	None	None	None	None	None	None	None	None	None	None	None	None	None	None	None	None	None	None	None	None	None	None	None	None	None
167.m03317	CNAG_02389	None	None	None	None	None	None	None	KOG0694	T	Serine/threonine protein kinase	AGC-group protein kinase	None	None	None	None	None	None	None	None	None	None	None	None	None	None	None	None	None	None	None	None	None	None	None	None	None	None	None	None	None	None	None	None	None	None	None	None	None
167.m03673	CNAG_02540	None	None	None	None	None	None	None	KOG2533	G	Permease of the major facilitator superfamily	conserved hypothetical protein	None	None	None	None	None	None	None	None	None	None	None	None	None	None	None	None	None	None	None	None	None	None	None	None	None	None	None	None	None	None	None	None	None	None	None	None	None
167.m05754	CNAG_02552	None	None	None	None	None	None	None	KOG0523	G	Transketolase	transketolase	None	None	None	None	None	None	None	None	None	None	None	None	None	None	None	None	None	None	None	None	None	None	None	None	None	None	None	None	None	None	None	None	None	None	None	None	None
176.m02221	CNAG_02594	None	None	None	None	None	None	None	KOG0307	U	Vesicle coat complex COPII, subunit SEC31	conserved hypothetical protein	None	None	None	None	None	None	None	None	None	None	None	None	None	None	None	None	None	None	None	None	None	None	None	None	None	None	None	None	None	None	None	None	None	None	None	None	None
176.m02527	CNAG_02674	None	None	None	None	orf19.4046	ca2491	IPF7221	KOG0324	S	Uncharacterized conserved protein	dJ347H13.4	None	None	unknown function	None	None	None	None	None	None	None	None	None	None	None	None	None	None	None	None	None	None	None	None	None	None	None	None	None	None	None	None	None	None	None	None	None	None
179.m00319	CNAG_02741	YKL134C	^OCT1	SPAC1F3.10c	40087	orf19.1195	ca1374	MIP1	KOG2090	O	Metalloendopeptidase family - mitochondrial intermediate peptidase	mitochondrial intermediate peptidase	Mitochondrial intermediate peptidase, cleaves N-terminal residues of a subset of proteins upon import, after their cleavage by mitochondrial processing peptidase (Mas1p-Mas2p); may contribute to mitochondrial iron homeostasis	mitochondrial intermediate peptidase Oct1 (predicted)	Mitochondrial intermediate peptidase (by homology)	Sce_OS-up_2.0	None	None	None	None	None	None	None	None	None	None	None	None	None	None	None	None	None	None	None	None	None	None	None	None	None	None	None	None	None	None	None	None	None
179.m00343	CNAG_02775	None	None	None	None	None	None	None	None	None	None	conserved hypothetical protein	None	None	None	None	None	None	None	None	None	None	None	None	None	None	None	None	None	None	None	None	None	None	None	None	None	None	None	None	None	None	None	None	None	None	None	None	None
179.m00499	CNAG_02958	None	None	None	None	orf19.4213	ca2922	FET31	KOG1263	Q	Multicopper oxidases	ferroxidase	None	None	cell surface ferroxidase (by homology)	None	None	None	None	None	None	None	None	None	None	None	None	None	None	None	None	None	None	None	None	None	None	None	None	None	None	None	None	None	None	None	None	None	None
179.m00035	CNAG_03052	YBL056W	PTC3	SPCC1223.11	ptc2	orf19.2538	ca0047	PTC2	KOG0698	T	Serine/threonine protein phosphatase	PP2Cc protein phosphatase	Type 2C protein phosphatase; dephosphorylates Hog1p (see also Ptc2p) to limit maximal kinase activity induced by osmotic stress; dephosphorylates T169 phosphorylated Cdc28p (see also Ptc2p); role in DNA checkpoint inactivation	protein phosphatase 2C Ptc2	Protein phosphatase type 2C (by homology)	None	None	None	None	None	None	None	None	None	None	None	None	None	None	None	None	None	None	None	None	None	None	None	None	None	None	None	None	None	None	None	None	None	None
179.m00613	CNAG_03057	None	None	None	None	None	None	None	KOG1216	WV	von Willebrand factor and related coagulation proteins	conserved hypothetical protein	None	None	None	None	None	None	None	None	None	None	None	None	None	None	None	None	None	None	None	None	None	None	None	None	None	None	None	None	None	None	None	None	None	None	None	None	None
179.m00011	CNAG_03081	YGL064C	MRH4	None	None	None	None	None	KOG0335	A	ATP-dependent RNA helicase	RNA helicase	Mitochondrial ATP-dependent RNA helicase of the DEAD-box family, plays an essential role in mitochondrial function	None	None	None	None	None	None	None	None	None	None	None	None	None	None	None	None	None	None	None	None	None	None	None	None	None	None	None	None	None	None	None	None	None	None	None	None
177.m03353	CNAG_03258	None	None	None	None	None	None	None	KOG0616	T	cAMP-dependent protein kinase catalytic subunit (PKA)	AGC-group protein kinase	None	None	None	None	None	None	None	None	None	None	None	None	None	None	None	None	None	None	None	None	None	None	None	None	None	None	None	None	None	None	None	None	None	None	None	None	None
177.m03471	CNAG_03315	YPR165W	RHO1	SPAC1F7.04	rho1	orf19.2843	ca2866	RHO1	KOG0393	R	Ras-related small GTPase, Rho type	Rho1 GTP-binding protein	GTP-binding protein of the rho subfamily of Ras-like proteins, involved in establishment of cell polarity; regulates protein kinase C (Pkc1p) and the cell wall synthesizing enzyme 1,3-beta-glucan synthase (Fks1p and Gsc2p)	Rho family GTPase Rho1	GTP-binding protein of the rho subfamily of ras-like proteins (by homology)	None	None	None	None	None	None	None	None	None	None	None	None	None	None	None	None	None	None	None	Cal_XS-dw	None	None	None	Cal_SSR.XS-dw	None	None	None	None	None	Cal_XS-dw_1.5	None	None	None	None
177.m03441	CNAG_03384	None	None	None	None	None	None	None	None	None	None	conserved hypothetical protein	None	None	None	None	None	None	None	None	None	None	None	None	None	None	None	None	None	None	None	None	None	None	None	None	None	None	None	None	None	None	None	None	None	None	None	None	None
177.m03002	CNAG_03433	None	None	None	None	None	None	None	None	None	None	endo alpha-1,4 polygalactosaminidase precusor	None	None	None	None	None	None	None	None	None	None	None	None	None	None	None	None	None	None	None	None	None	None	None	None	None	None	None	None	None	None	None	None	None	None	None	None	None
177.m02973	CNAG_03465	None	None	None	None	None	None	None	KOG1263	Q	Multicopper oxidases	laccase	None	None	None	None	None	None	None	None	None	None	None	None	None	None	None	None	None	None	None	None	None	None	None	None	None	None	None	None	None	None	None	None	None	None	None	None	None
177.m03382	CNAG_03465	None	None	None	None	None	None	None	KOG1263	Q	Multicopper oxidases	laccase	None	None	None	None	None	None	None	None	None	None	None	None	None	None	None	None	None	None	None	None	None	None	None	None	None	None	None	None	None	None	None	None	None	None	None	None	None
177.m02915	CNAG_03532	YLL056C	None	SPBC2A9.02	None	None	None	None	KOG1502	V	Flavonol reductase/cinnamoyl-CoA reductase	3-beta hydroxysteroid dehydrogenase/isomerase	None	NAD dependent epimerase/dehydratase family protein	None	None	None	Sce_XS-up_2.0	None	None	None	None	None	Spo_OS-up_2.0	None	Spo_XS-up_2.0	None	Spo_Cd-up_2.0	None	Spo_CESR-up	None	None	None	None	None	None	None	None	None	None	None	None	None	None	None	None	None	None	None
177.m03373	CNAG_03544	None	None	None	None	orf19.6607	ca3847	IPF7942	None	None	None	conserved hypothetical protein	None	None	NADH-ubiquinone oxidoreductase	None	None	None	None	None	None	None	None	None	None	None	None	None	None	None	None	None	None	None	None	None	None	None	None	None	None	None	None	None	None	None	None	None	None
186.m03566	CNAG_03644	None	None	None	None	None	None	None	None	None	None	CAS3p	None	None	None	None	None	None	None	None	None	None	None	None	None	None	None	None	None	None	None	None	None	None	None	None	None	None	None	None	None	None	None	None	None	None	None	None	None
186.m04041	CNAG_03734	None	None	None	None	None	None	None	KOG2748	B	Uncharacterized conserved protein, contains chromo domain	conserved hypothetical protein	None	None	None	None	None	None	None	None	None	None	None	None	None	None	None	None	None	None	None	None	None	None	None	None	None	None	None	None	None	None	None	None	None	None	None	None	None
186.m03748	CNAG_03823	YOL133W	HRT1	SPAC23H4.18c	rbx1	orf19.233.1	None	None	KOG2930	O	SCF ubiquitin ligase, Rbx1 component	ubiquitin-protein ligase	RING finger containing subunit of Skp1-Cullin-F-box ubiquitin protein ligases (SCF); required for Gic2p, Far1p, Sic1p and Cln2p degradation; may tether Cdc34p (a ubiquitin conjugating enzyme or E2) and Cdc53p (a cullin) subunits of SCF	RING-box protein 1	None	None	None	Sce_XS-up_2.0	None	None	None	None	None	None	None	None	None	None	None	None	None	None	None	None	None	None	None	None	None	None	None	None	None	None	None	None	None	None	None
186.m03767	CNAG_03842	None	None	None	None	None	None	None	None	None	None	conserved hypothetical protein	None	None	None	None	None	None	None	None	None	None	None	None	None	None	None	None	None	None	None	None	None	None	None	None	None	None	None	None	None	None	None	None	None	None	None	None	None
186.m03770	CNAG_03844	None	None	None	None	None	None	None	None	None	None	nonselective cation channel	None	None	None	None	None	None	None	None	None	None	None	None	None	None	None	None	None	None	None	None	None	None	None	None	None	None	None	None	None	None	None	None	None	None	None	None	None
186.m03809	CNAG_03877	None	None	None	None	None	None	None	KOG2740	U	Clathrin-associated protein medium chain	adaptor complex subunit medium chain 3	None	None	None	None	None	None	None	None	None	None	None	None	None	None	None	None	None	None	None	None	None	None	None	None	None	None	None	None	None	None	None	None	None	None	None	None	None
186.m03829	CNAG_03901	YPL060W	LPE10	SPBC25H2.08c	mrs2	orf19.2597	ca2271	MRS2	KOG2662	P	Magnesium transporters: CorA family	magnesium ion transporter	Mitochondrial inner membrane magnesium transporter, involved in maintenance of magnesium concentrations inside mitochondria; indirectly affects splicing of group II introns; functionally and structurally related to Mrs2p	magnesium ion transporter Mrs2	Mitochondrial RNA splicing protein (by homology)	Sce_OS-up_2.0	None	Sce_XS-up_2.0	None	Sce_HS-up_2.0	None	Sce_CSR-up_2.0	None	None	None	None	Spo_XS-dw_2.0	None	None	None	None	None	None	None	None	None	None	None	None	None	None	None	None	None	None	None	None	None	None
186.m03839	CNAG_03915	YHL026C	None	SPCC594.02c	None	None	None	None	None	None	None	conserved hypothetical protein	None	conserved fungal protein	None	None	None	None	Sce_XS-dw_2.0	None	Sce_HS-dw_2.0	None	None	None	None	None	None	None	None	None	None	None	None	None	None	None	None	None	None	None	None	None	None	None	None	None	None	None	None
186.m03842	CNAG_03917	None	None	SPBC17G9.04c	nup85	None	None	None	KOG2271	YU	Nuclear pore complex component (sc Nup85)	conserved hypothetical protein	None	nucleoporin Nup85	None	None	None	None	None	None	None	None	None	None	None	None	None	None	None	None	None	None	None	None	None	None	None	None	None	None	None	None	None	None	None	None	None	None	None
186.m03845	CNAG_03919	YDR511W	ACN9	SPBP23A10.03c	None	orf19.6328	ca3294	IPF5725	KOG4100	S	Uncharacterized conserved protein	acetate non-utilizing protein 9	Protein of the mitochondrial intermembrane space, required for acetate utilization and gluconeogenesis; has orthologs in higher eukaryotes	ACN9 family mitochondrial protein	unknown function	None	None	None	None	Sce_HS-up_2.0	None	None	None	None	None	None	None	None	None	None	None	None	None	None	None	None	None	None	None	None	None	None	None	None	None	None	None	None	None
186.m03849	CNAG_03921	None	None	None	None	None	None	None	None	None	None	conserved hypothetical protein	None	None	None	None	None	None	None	None	None	None	None	None	None	None	None	None	None	None	None	None	None	None	None	None	None	None	None	None	None	None	None	None	None	None	None	None	None
186.m03856	CNAG_03929	YML038C	YMD8	SPAC22E12.01	None	orf19.6480	ca1995	IPF6612	KOG1443	S	Predicted integral membrane protein	Cas42p	Putative nucleotide sugar transporter, has similarity to Vrg4p	membrane transporter (predicted)	unknown function	None	None	None	None	None	Sce_HS-dw_2.0	None	None	None	None	None	None	None	None	None	None	None	None	None	None	None	None	None	None	None	None	None	None	None	None	None	None	None	None
186.m03909	CNAG_03992	None	None	None	None	None	None	None	None	None	None	GTP-binding protein 1	None	None	None	None	None	None	None	None	None	None	None	None	None	None	None	None	None	None	None	None	None	None	None	None	None	None	None	None	None	None	None	None	None	None	None	None	None
186.m03911	CNAG_03994	YDR435C	PPM1	SPBP8B7.08c	None	orf19.6377	ca3541	IPF5425	KOG2918	O	Carboxymethyl transferase	leucine carboxyl methyltransferase 1	Carboxyl methyl transferase, methylates the C terminus of the protein phosphatase 2A catalytic subunit (Pph21p or Pph22p), which is important for complex formation with regulatory subunits	leucine carboxyl methyltransferase (predicted)	similar to Saccharomyces cerevisiae Ppm1p carboxy methyltransferase (by homology)	None	None	None	None	None	None	None	None	None	None	None	None	None	None	None	None	None	None	None	None	None	None	None	None	None	None	None	None	None	None	None	None	None	None
186.m03914	CNAG_03996	YEL042W	GDA1	SPAC824.08	gda1	orf19.7394	ca5693	GDA1	KOG1385	F	Nucleoside phosphatase	guanosine-diphosphatase	Guanosine diphosphatase located in the Golgi, involved in the transport of GDP-mannose into the Golgi lumen by converting GDP to GMP after mannose is transferred its substrate	guanosine-diphosphatase Gda1	Golgi guanosine diphosphatase (by homology)	None	Sce_OS-dw_2.0	None	None	None	Sce_HS-dw_2.0	None	None	None	None	None	None	None	None	None	None	None	None	None	None	None	None	None	None	None	None	None	None	None	Cal_XS-dw_1.5	None	None	None	None
186.m03966	CNAG_04036	None	None	None	None	None	None	None	KOG0627	K	Heat shock transcription factor	conserved hypothetical protein	None	None	None	None	None	None	None	None	None	None	None	None	None	None	None	None	None	None	None	None	None	None	None	None	None	None	None	None	None	None	None	None	None	None	None	None	None
186.m04003	CNAG_04074	YGL137W	SEC27	SPBC16C6.13c	sec27	orf19.3467	ca2033	SEC27	KOG0276	U	Vesicle coat complex COPI, beta' subunit	coatomer beta' subunit	Essential beta'-coat protein of the COPI coatomer, involved in ER-to-Golgi and Golgi-to-ER transport; contains WD40 domains that mediate cargo selective interactions; 45% sequence identity to mammalian beta'-COP	coatomer beta' subunit (predicted)	coatomer complex beta chain (beta -cop) of secretory pathway vesicles (by homology)	None	None	None	None	None	None	None	None	None	None	None	None	None	None	None	None	None	None	None	None	None	None	None	None	None	None	None	None	None	None	None	None	None	None
186.m04013	CNAG_04090	None	None	SPBC29B5.01	atf1	orf19.1032	ca1627	SKO1.3f	KOG1414	K	Transcriptional activator FOSB/c-Fos and related bZIP transcription factors	activating transcription factor 2	None	transcription factor Atf1	Cre-binding bzip protein, 3-prime end (by homology)	None	None	None	None	None	None	None	None	Spo_OS-up_2.0	None	Spo_XS-up_2.0	None	Spo_Cd-up_2.0	None	Spo_CESR-up	None	None	None	None	None	None	None	None	None	Cal_OS-up_1.5	None	None	None	None	None	None	None	None	None
162.m02715	CNAG_04387	YPR082C	DIB1	SPCC16A11.05c	dim1	orf19.1975	ca0468	DIB1	KOG3414	AD	Component of the U4/U6.U5 snRNP/mitosis protein DIM1	pre-mRNA splicing factor	17-kDa component of the U4/U6aU5 tri-snRNP, plays an essential role in pre-mRNA splicing, orthologue of hDIM1, the human U5-specific 15-kDa protein	U4/U6 x U5 tri-snRNP complex subunit Dim1	Component of the U4/U6.U5 snRNP (by homology)	None	None	None	None	None	None	None	None	None	None	None	None	None	None	None	None	None	None	None	None	None	None	None	None	None	None	None	None	None	None	None	None	None	None
162.m02726	CNAG_04388	YHR008C	SOD2	SPAC1486.01	None	orf19.7111.1	None	None	KOG0876	P	Manganese superoxide dismutase	mitochondrial superoxide dismutase Sod2	Mitochondrial superoxide dismutase, protects cells against oxygen toxicity; phosphorylated	manganese superoxide dismutase (AF069292)	None	None	None	Sce_XS-up_2.0	None	Sce_HS-up_2.0	None	None	None	None	None	None	None	Spo_Cd-up_2.0	None	None	None	None	None	None	None	None	None	None	None	None	None	None	None	None	None	None	None	None	None
162.m02662	CNAG_04448	YBR084C-A	RPL19A	SPCC1682.14	rpl1902	orf19.5904	ca6141	RPL19A	KOG1696	J	60s ribosomal protein L19	60S ribosomal protein L19	Protein component of the large (60S) ribosomal subunit, nearly identical to Rpl19Bp and has similarity to rat L19 ribosomal protein; rpl19a and rpl19b single null mutations result in slow growth, while the double null mutation is lethal	60S ribosomal protein L19B	Ribosomal protein L19.e (by homology)	None	None	None	Sce_XS-dw_2.0	None	Sce_HS-dw_2.0	None	None	None	None	None	Spo_XS-dw_2.0	None	None	None	None	None	None	None	None	None	None	None	None	None	None	None	None	None	None	None	None	None	None
185.m02444	CNAG_04662	YPR135W	CTF4	SPAPB1E7.02c	mcl1	orf19.6247	ca0964	IPF9141	KOG1274	R	WD40 repeat protein	sepB	Chromatin-associated protein, required for sister chromatid cohesion; interacts with DNA polymerase alpha (Pol1p) and may link DNA synthesis to sister chromatid cohesion	DNA polymerase alpha accessory factor Mcl1	similar to Saccharomyces cerevisiae Ctf4p DNA-directed DNA polymerase alpha-binding protein (by homology)	None	None	None	None	None	None	None	None	None	None	None	Spo_XS-dw_2.0	None	None	None	None	None	None	None	None	None	None	None	None	None	None	None	None	None	Cal_XS-dw_1.5	None	None	None	None
185.m02743	CNAG_04727	None	None	None	None	None	None	None	KOG4194	T	Membrane glycoprotein LIG-1	conserved hypothetical protein	None	None	None	None	None	None	None	None	None	None	None	None	None	None	None	None	None	None	None	None	None	None	None	None	None	None	None	None	None	None	None	None	None	None	None	None	None
185.m02583	CNAG_04813	YHR026W	PPA1	SPAC2C4.13	vma16	orf19.4954	ca0512	VMA16	KOG0233	C	Vacuolar H+-ATPase V0 sector, subunit c''	hydrogen-transporting ATPase	Subunit c'' of the vacuolar ATPase, which functions in acidification of the vacuole; one of three proteolipid subunits of the V0 domain	V-type ATPase subunit c''	H+-ATPase 23 KD subunit, vacuolar (by homology)	None	None	None	None	None	None	None	None	None	None	None	None	None	None	None	None	None	None	None	None	None	None	None	None	None	None	None	None	None	Cal_XS-dw_1.5	None	None	None	None
185.m02607	CNAG_04837	None	None	None	None	orf19.2315	ca3300	RTG3	KOG1318	K	Helix loop helix transcription factor EB	conserved hypothetical protein	None	None	Probable bHLH/zip transcription factor that regulates CIT2 gene expression (by homology)	None	None	None	None	None	None	None	None	None	None	None	None	None	None	None	None	None	None	None	None	None	None	None	None	None	None	None	None	None	None	None	None	None	None
184.m04981	CNAG_04946	None	None	None	None	None	None	None	KOG2820	R	FAD-dependent oxidoreductase	conserved hypothetical protein	None	None	None	None	None	None	None	None	None	None	None	None	None	None	None	None	None	None	None	None	None	None	None	None	None	None	None	None	None	None	None	None	None	None	None	None	None
184.m04959	CNAG_04967	None	None	None	None	None	None	None	KOG0103	O	Molecular chaperones HSP105/HSP110/SSE1, HSP70 superfamily	conserved hypothetical protein	None	None	None	None	None	None	None	None	None	None	None	None	None	None	None	None	None	None	None	None	None	None	None	None	None	None	None	None	None	None	None	None	None	None	None	None	None
184.m04872	CNAG_05066	None	None	None	None	None	None	None	KOG1721	R	1 FOG: Zn-finger	conserved hypothetical protein	None	None	None	None	None	None	None	None	None	None	None	None	None	None	None	None	None	None	None	None	None	None	None	None	None	None	None	None	None	None	None	None	None	None	None	None	None
184.m05030	CNAG_05109	None	None	SPAC24C9.05c	mug70	orf19.5238	ca5008	IPF12577	None	None	None	CBS and PB1 domain-containing protein	None	conserved protein (fungal and plant)	unknown function	None	None	None	None	None	None	None	None	None	None	None	None	None	None	None	None	None	None	None	None	None	None	None	None	None	None	None	None	None	None	None	None	None	None
184.m04826	CNAG_05119	YKL174C	TPO5	None	None	orf19.151	ca0144	IPF19195.3f	KOG1289	E	Amino acid transporters	GabA permease	Protein involved in excretion of putrescine and spermidine; putative polyamine transporter in the Golgi or post-Golgi vesicles	None	putative amino acid or GABA permease, 3-prime end (by homology)	None	None	None	Sce_XS-dw_2.0	None	None	None	None	None	None	None	None	None	None	None	None	None	None	None	None	None	None	None	None	None	None	None	None	None	None	None	None	None	None
184.m04802	CNAG_05144	YNL036W	NCE103	None	None	orf19.1721	ca2796	IPF8405	KOG1578	P	Predicted carbonic anhydrase involved in protection against oxidative damage	carbonic anhydrase 2	Carbonic anhydrase; poorly transcribed under aerobic conditions and at an undetectable level under anaerobic conditions; involved in non-classical protein export pathway	None	similar to Saccharomyces cerevisiae Nce103p involved in non-classical protein export pathway (by homology)	Sce_OS-up_2.0	None	Sce_XS-up_2.0	None	Sce_HS-up_2.0	None	Sce_CSR-up_2.0	None	None	None	None	None	None	None	None	None	None	None	None	None	None	None	None	None	None	Cal_OS-dw_1.5	None	None	None	Cal_XS-dw_1.5	None	None	None	None
184.m04793	CNAG_05155	YER075C	PTP3	SPAC26F1.10c	pyp1	orf19.7610	ca6009	IPF643	KOG0789	T	Protein tyrosine phosphatase	protein-tyrosine-phosphatase	Phosphotyrosine-specific protein phosphatase involved in the inactivation of mitogen-activated protein kinase (MAPK) during osmolarity sensing; dephosporylates Hog1p MAPK and regulates its localization; localized to the cytoplasm	tyrosine phosphatase Pyp1	similar to Saccharomyces cerevisiae Ptp3p protein tyrosine phosphatase (by homology)	None	None	None	None	None	Sce_HS-dw_2.0	None	None	Spo_OS-up_2.0	None	None	None	None	None	None	None	None	None	None	None	None	None	None	None	None	None	None	None	None	None	None	None	None	None
184.m04765	CNAG_05191	YOR154W	SLP1	SPBC3E7.09	None	orf19.4738	ca1944	IPF10645	KOG1396	S	Uncharacterized conserved protein	conserved hypothetical protein	Integral membrane protein of unknown function; member of the SUN-like family of proteins	Sad1-UNC-like C-terminal	unknown function	None	None	None	None	None	Sce_HS-dw_2.0	None	None	None	None	None	None	None	None	None	None	None	None	None	None	None	None	None	None	None	None	None	None	None	None	None	None	None	None
184.m04759	CNAG_05195	YDL190C	UFD2	SPAC20H4.10	ufd2	orf19.5965	ca6091	UFD2	KOG2042	O	Ubiquitin fusion degradation protein-2	ubiquitin fusion degradation protein-2	Ubiquitin chain assembly factor (E4) that cooperates with a ubiquitin-activating enzyme (E1), a ubiquitin-conjugating enzyme (E2), and a ubiquitin protein ligase (E3) to conjugate ubiquitin to substrates; also functions as an E3	ubiquitin-protein ligase E4 (predicted)	Ubiquitin fusion degradation protein 2 (by homology)	None	None	None	None	None	None	None	None	None	None	None	None	None	None	None	None	None	None	None	None	None	None	None	None	None	None	None	None	None	None	None	None	None	None
184.m04720	CNAG_05243	YGR194C	XKS1	SPCPJ732.02c	None	orf19.1290	None	None	KOG2531	G	Sugar (pentulose and hexulose) kinases	xylulokinase	Xylulokinase, converts D-xylulose and ATP to xylulose 5-phosphate and ADP; rate limiting step in fermentation of xylulose; required for xylose fermentation by recombinant S. cerevisiae strains	xylulose kinase (predicted)	None	None	None	None	None	Sce_HS-up_2.0	None	None	None	None	None	Spo_XS-up_2.0	None	None	None	None	None	None	None	None	None	None	None	None	None	None	None	None	None	None	None	None	None	None	None
184.m05024	CNAG_05248	YKL135C	APL2	SPBC947.02	apl2	orf19.231	ca0321	APL2	KOG1061	U	Vesicle coat complex AP-1/AP-2/AP-4, beta subunit	clathrin binding protein	Beta-adaptin, large subunit of the clathrin-associated protein (AP-1) complex; binds clathrin; involved in clathrin-dependent Golgi protein sorting	AP-1 adaptor complex subunit Apl2 (predicted)	AP-1 complex subunit, beta1-adaptin (by homology)	None	None	None	None	None	None	None	None	None	None	None	None	None	None	None	None	None	None	None	None	None	None	None	None	None	None	None	None	None	None	None	None	None	None
184.m05134	CNAG_05259	None	None	None	None	None	None	None	None	None	None	conserved hypothetical protein	None	None	None	None	None	None	None	None	None	None	None	None	None	None	None	None	None	None	None	None	None	None	None	None	None	None	None	None	None	None	None	None	None	None	None	None	None
184.m04690	CNAG_05273	YMR009W	ADI1	SPBC887.01	None	orf19.2306	ca3311	IPF8809	KOG2107	S	Uncharacterized conserved protein, contains double-stranded beta-helix domain	1,2-dihydroxy-3-keto-5-methylthiopentene dioxygenase	Acireductone dioxygenease involved in the methionine salvage pathway; ortholog of human MTCBP-1; transcribed with YMR010W and regulated post-transcriptionally by RNase III (Rnt1p) cleavage; ADI1 mRNA is induced in heat shock conditions	acireductone dioxygenase family	unknown function	None	None	Sce_XS-up_2.0	None	None	None	None	None	None	None	None	None	Spo_Cd-up_2.0	None	None	None	None	None	None	None	None	None	None	None	None	None	None	None	None	None	None	None	None	None
184.m04363	CNAG_05373	None	None	None	None	None	None	None	KOG3949	BK	RNA polymerase II elongator complex, subunit ELP4	conserved hypothetical protein	None	None	None	None	None	None	None	None	None	None	None	None	None	None	None	None	None	None	None	None	None	None	None	None	None	None	None	None	None	None	None	None	None	None	None	None	None
184.m04415	CNAG_05429	None	None	None	None	None	None	None	KOG4534	S	Uncharacterized conserved protein	conserved hypothetical protein	None	None	None	None	None	None	None	None	None	None	None	None	None	None	None	None	None	None	None	None	None	None	None	None	None	None	None	None	None	None	None	None	None	None	None	None	None
184.m04563	CNAG_05586	None	None	None	None	None	None	None	KOG3656	R	FOG: 7 transmembrane receptor	conserved hypothetical protein	None	None	None	None	None	None	None	None	None	None	None	None	None	None	None	None	None	None	None	None	None	None	None	None	None	None	None	None	None	None	None	None	None	None	None	None	None
180.m00280	CNAG_05885	None	None	None	None	None	None	None	None	None	None	conserved hypothetical protein	None	None	None	None	None	None	None	None	None	None	None	None	None	None	None	None	None	None	None	None	None	None	None	None	None	None	None	None	None	None	None	None	None	None	None	None	None
180.m00286	CNAG_05893	None	None	None	None	None	None	None	KOG1257	C	NADP+-dependent malic enzyme	conserved hypothetical protein	None	None	None	None	None	None	None	None	None	None	None	None	None	None	None	None	None	None	None	None	None	None	None	None	None	None	None	None	None	None	None	None	None	None	None	None	None
180.m00269	CNAG_05931	YJL059W	YHC3	SPAC607.09c	btn1	orf19.4059	ca1483	YHC3	KOG3880	R	Predicted small molecule transporter involved in cellular pH homeostasis (Batten disease protein in human)	basic amino acid transporter	Vacuolar membrane protein involved in the ATP-dependent transport of arginine into the vacuole and possibly in balancing ion homeostasis; homolog of human CLN3 involved in Batten disease (juvenile onset neuronal ceroid lipofuscinosis)	battenin CLN3 family protein	involved in cellular pH homeostasis (by homology)	None	None	None	None	None	None	None	None	None	None	Spo_XS-up_2.0	None	Spo_Cd-up_2.0	None	None	None	None	None	None	None	None	None	None	None	None	None	None	None	None	None	None	None	None	None
180.m00005	CNAG_05976	YOR310C	NOP58	SPAC23G3.06	None	orf19.1199	ca1438	NOP58	KOG2572	AJ	Ribosome biogenesis protein - Nop58p/Nop5p	SnoRNA binding domain containing protein	Protein involved in pre-rRNA processing, 18S rRNA synthesis, and snoRNA synthesis; component of the small subunit processome complex, which is required for processing of pre-18S rRNA	U3 snoRNP protein Nop58 (predicted)	nucleolar protein required for pre-18S rRNA processing	None	Sce_OS-dw_2.0	None	Sce_XS-dw_2.0	None	Sce_HS-dw_2.0	None	Sce_CSR-dw_2.0	None	None	None	None	None	None	None	None	None	None	None	None	None	None	None	None	None	Cal_OS-dw_1.5	None	Cal_OS-dw_2.0	None	None	None	None	None	None
183.m01822	CNAG_06290	YLR081W	GAL2	None	None	None	None	None	KOG0254	R	Predicted transporter (major facilitator superfamily)	sugar transporter	Galactose permease, required for utilization of galactose; also able to transport glucose	None	None	None	None	None	None	Sce_HS-up_2.0	None	None	None	None	None	None	None	None	None	None	None	None	None	None	None	None	None	None	None	None	None	None	None	None	None	None	None	None	None
183.m01839	CNAG_06322	None	None	None	None	None	None	None	KOG2747	B	Histone acetyltransferase (MYST family)	conserved hypothetical protein	None	None	None	None	None	None	None	None	None	None	None	None	None	None	None	None	None	None	None	None	None	None	None	None	None	None	None	None	None	None	None	None	None	None	None	None	None
183.m01655	CNAG_06356	YKL027W	None	SPAC1A6.10	None	orf19.2115	ca2730	IPF10325	KOG2018	O	Predicted dinucleotide-utilizing enzyme involved in molybdopterin and thiamine biosynthesis	mitochondrial protein	None	Moeb/ThiF domain	molybdopterin-converting factor by homology	None	None	None	Sce_XS-dw_2.0	None	None	None	None	None	None	None	None	None	None	None	None	None	None	None	Cal_XS-dw	None	Cal_HS-dw	None	None	None	None	None	None	None	None	None	None	None	None
183.m01724	CNAG_06433	YBR222C	PCS60	SPCC1827.03c	None	None	None	None	KOG1176	I	Acyl-CoA synthetase	AMP binding protein	Peroxisomal AMP-binding protein, localizes to both the peroxisomal peripheral membrane and matrix, expression is highly inducible by oleic acid, similar to E. coli long chain acyl-CoA synthetase	acetyl-CoA ligase (predicted)	None	None	None	None	None	None	None	None	None	None	None	None	None	None	None	None	None	None	None	None	None	None	None	None	None	None	None	None	None	None	None	None	None	None	None
180.m00460	CNAG_06537	None	None	None	None	None	None	None	None	None	None	monocarboxylic acid transporter	None	None	None	None	None	None	None	None	None	None	None	None	None	None	None	None	None	None	None	None	None	None	None	None	None	None	None	None	None	None	None	None	None	None	None	None	None
180.m00223	CNAG_06560	None	None	None	None	None	None	None	KOG1515	V	Arylacetamide deacetylase	esterase	None	None	None	None	None	None	None	None	None	None	None	None	None	None	None	None	None	None	None	None	None	None	None	None	None	None	None	None	None	None	None	None	None	None	None	None	None
180.m02954	CNAG_06596	None	None	None	None	None	None	None	None	None	None	conserved hypothetical protein	None	None	None	None	None	None	None	None	None	None	None	None	None	None	None	None	None	None	None	None	None	None	None	None	None	None	None	None	None	None	None	None	None	None	None	None	None
180.m00165	CNAG_06668	YNR018W	AIM38	None	None	None	None	None	None	None	None	mitochondrial protein	Putative protein of unknown function; non-tagged protein is detected in purified mitochondria; null mutant displays decreased frequency of mitochondrial genome loss (petite formation) and severe growth defect in minimal glycerol media	None	None	None	None	None	None	None	None	None	None	None	None	None	None	None	None	None	None	None	None	None	None	None	None	None	None	None	None	None	None	None	None	None	None	None	None
186.m03498	CNAG_06717	None	None	SPAC1A6.09c	lag1	orf19.7354	ca5652	IPF19815	KOG1607	U	Protein transporter of the TRAM (translocating chain-associating membrane) superfamily	longevity-assurance protein	None	sphingosine N-acyltransferase Lag1	longevity-assurance protein (by homology)	None	None	None	None	None	None	None	None	None	None	None	None	None	None	None	None	None	None	None	None	None	None	None	None	None	None	None	None	None	Cal_XS-dw_1.5	None	Cal_XS-dw_2.0	None	None
186.m03441	CNAG_06769	YOR330C	MIP1	SPCC24B10.22	None	orf19.3431	ca4033	IPF19795	KOG3657	L	Mitochondrial DNA polymerase gamma, catalytic subunit	gamma DNA-directed DNA polymerase	Catalytic subunit of the mitochondrial DNA polymerase; conserved C-terminal segment is required for the maintenance of mitochondrial genome.	mitochondrial DNA polymerase gamma catalytic subunit	similar to Saccharomyces cerevisiae Mip1p DNA-directed DNA polymerase gamma catalytic subunit, mitochondrial (by homology)	None	None	None	None	None	None	None	None	Spo_OS-up_2.0	None	None	None	None	None	None	None	None	None	None	Cal_XS-dw	None	None	None	Cal_SSR.XS-dw	None	None	None	None	None	None	None	None	None	None
177.m02858	CNAG_06968	None	None	None	None	None	None	None	KOG1808	R	AAA ATPase containing von Willebrand factor type A (vWA) domain	hypothetical protein	None	None	None	None	None	None	None	None	None	None	None	None	None	None	None	None	None	None	None	None	None	None	None	None	None	None	None	None	None	None	None	None	None	None	None	None	None
181.m07973	CNAG_07330	None	None	None	None	None	None	None	KOG0099	T	G protein subunit Galphas, small G protein superfamily	conserved hypothetical protein	None	None	None	None	None	None	None	None	None	None	None	None	None	None	None	None	None	None	None	None	None	None	None	None	None	None	None	None	None	None	None	None	None	None	None	None	None
163.m06225	CNAG_07422	None	None	None	None	None	None	None	KOG1225	TW	Teneurin-1 and related extracellular matrix proteins, contain EGF-like repeats	delayed-type hypersensitivity antigen	None	None	None	None	None	None	None	None	None	None	None	None	None	None	None	None	None	None	None	None	None	None	None	None	None	None	None	None	None	None	None	None	None	None	None	None	None
186.m03496	CNAG_07465	None	None	None	None	None	None	None	KOG4168	K	Predicted RNA polymerase III subunit C17	conserved hypothetical protein	None	None	None	None	None	None	None	None	None	None	None	None	None	None	None	None	None	None	None	None	None	None	None	None	None	None	None	None	None	None	None	None	None	None	None	None	None
176.m02252	CNAG_07558	YKL117W	SBA1	SPAC9E9.13	wos2	orf19.5749	ca0896	SBA1	KOG3158	O	HSP90 co-chaperone p23	wos2 protein	Co-chaperone that binds to and regulates Hsp90 family chaperones; important for pp60v-src activity in yeast; homologous to the mammalian p23 proteins and like p23 can regulate telomerase activity	p23 homolog	Hsp90 (Ninety) Associated Co-chaperone (by homology)	None	None	Sce_XS-up_2.0	None	None	None	None	None	None	None	None	Spo_XS-dw_2.0	Spo_Cd-up_2.0	None	None	None	None	None	None	None	Cal_HS-up	None	Cal_SSR.HS-up	None	None	None	None	None	None	None	None	None	Cal_Cd-up_1.5	None
167.m05803	CNAG_07625	YGR266W	None	None	None	orf19.3983	ca3406	IPF9711	None	None	None	plasma membrane protein	None	None	unknown function	None	None	None	None	None	None	None	None	None	None	None	None	None	None	None	None	Cal_OS-up	None	None	None	None	None	Cal_SSR.OS-up	None	None	None	None	None	None	None	None	None	None	None
184.m04760	CNAG_07641	None	None	None	None	None	None	None	KOG0254	R	Predicted transporter (major facilitator superfamily)	monosaccharide transporter	None	None	None	None	None	None	None	None	None	None	None	None	None	None	None	None	None	None	None	None	None	None	None	None	None	None	None	None	None	None	None	None	None	None	None	None	None
180.m00013	CNAG_07700	None	None	None	None	None	None	None	KOG0017	R	FOG: Transposon-encoded proteins with TYA, reverse transcriptase, integrase domains in various combinations	conserved hypothetical protein	None	None	None	None	None	None	None	None	None	None	None	None	None	None	None	None	None	None	None	None	None	None	None	None	None	None	None	None	None	None	None	None	None	None	None	None	None
179.m00044	CNAG_07789	None	None	None	None	None	None	None	KOG0351	L	ATP-dependent DNA helicase	conserved hypothetical protein	None	None	None	None	None	None	None	None	None	None	None	None	None	None	None	None	None	None	None	None	None	None	None	None	None	None	None	None	None	None	None	None	None	None	None	None	None
184.m04961	CNAG_07798	None	None	None	None	None	None	None	None	None	None	amidohydrolase 3	None	None	None	None	None	None	None	None	None	None	None	None	None	None	None	None	None	None	None	None	None	None	None	None	None	None	None	None	None	None	None	None	None	None	None	None	None
184.m04644	CNAG_07830	None	None	None	None	None	None	None	None	None	None	conserved hypothetical protein	None	None	None	None	None	None	None	None	None	None	None	None	None	None	None	None	None	None	None	None	None	None	None	None	None	None	None	None	None	None	None	None	None	None	None	None	None
184.m04352	CNAG_07871	YPL031C	PHO85	SPCC16C4.11	pef1	orf19.6846	ca4448	PHO85	KOG0594	R	Protein kinase PCTAIRE and related kinases	CMGC/CDK protein kinase	Cyclin-dependent kinase, with ten cyclin partners; involved in regulating the cellular response to nutrient levels and environmental conditions and progression through the cell cycle	Pho85/PhoA-like cyclin-dependent kinase Pef1	Negative regulator of PHO system	None	None	None	None	None	None	None	None	None	None	None	None	None	None	None	None	None	None	None	None	None	None	None	None	None	None	None	None	None	None	None	None	None	None
162.m02197	None	None	None	None	None	None	None	None	None	None	None	None	None	None	None	None	None	None	None	None	None	None	None	None	None	None	None	None	None	None	None	None	None	None	None	None	None	None	None	None	None	None	None	None	None	None	None	None	None
162.m02497	None	None	None	None	None	None	None	None	None	None	None	None	None	None	None	None	None	None	None	None	None	None	None	None	None	None	None	None	None	None	None	None	None	None	None	None	None	None	None	None	None	None	None	None	None	None	None	None	None
162.m02604	None	None	None	None	None	None	None	None	None	None	None	None	None	None	None	None	None	None	None	None	None	None	None	None	None	None	None	None	None	None	None	None	None	None	None	None	None	None	None	None	None	None	None	None	None	None	None	None	None
164.m02533	None	None	None	None	None	None	None	None	None	None	None	None	None	None	None	None	None	None	None	None	None	None	None	None	None	None	None	None	None	None	None	None	None	None	None	None	None	None	None	None	None	None	None	None	None	None	None	None	None
176.m02377	None	None	None	None	None	None	None	None	None	None	None	None	None	None	None	None	None	None	None	None	None	None	None	None	None	None	None	None	None	None	None	None	None	None	None	None	None	None	None	None	None	None	None	None	None	None	None	None	None
176.m02416	None	None	None	None	None	None	None	None	None	None	None	None	None	None	None	None	None	None	None	None	None	None	None	None	None	None	None	None	None	None	None	None	None	None	None	None	None	None	None	None	None	None	None	None	None	None	None	None	None
179.m00718	None	None	None	None	None	None	None	None	None	None	None	None	None	None	None	None	None	None	None	None	None	None	None	None	None	None	None	None	None	None	None	None	None	None	None	None	None	None	None	None	None	None	None	None	None	None	None	None	None
181.m08012	None	None	None	None	None	None	None	None	None	None	None	None	None	None	None	None	None	None	None	None	None	None	None	None	None	None	None	None	None	None	None	None	None	None	None	None	None	None	None	None	None	None	None	None	None	None	None	None	None
181.m08050	None	None	None	None	None	None	None	None	None	None	None	None	None	None	None	None	None	None	None	None	None	None	None	None	None	None	None	None	None	None	None	None	None	None	None	None	None	None	None	None	None	None	None	None	None	None	None	None	None
183.m01621	None	None	None	None	None	None	None	None	None	None	None	None	None	None	None	None	None	None	None	None	None	None	None	None	None	None	None	None	None	None	None	None	None	None	None	None	None	None	None	None	None	None	None	None	None	None	None	None	None
184.m04687	None	None	None	None	None	None	None	None	None	None	None	None	None	None	None	None	None	None	None	None	None	None	None	None	None	None	None	None	None	None	None	None	None	None	None	None	None	None	None	None	None	None	None	None	None	None	None	None	None
184.m05170	None	None	None	None	None	None	None	None	None	None	None	None	None	None	None	None	None	None	None	None	None	None	None	None	None	None	None	None	None	None	None	None	None	None	None	None	None	None	None	None	None	None	None	None	None	None	None	None	None
185.m02740	None	None	None	None	None	None	None	None	None	None	None	None	None	None	None	None	None	None	None	None	None	None	None	None	None	None	None	None	None	None	None	None	None	None	None	None	None	None	None	None	None	None	None	None	None	None	None	None	None
[truncated: 16 more columns]

## Sheet: Cu-dependent genes
Gene ID/ name									Biological function							Stress Response Genes of C. neoformans var. grubii H99								Gene expression
C.neo (JEC21) ID	C.neo (H99) ID	Sce ID	Sce_Gene (SGD)	Spo ID	Spo_Gene (GeneDB)	Cal ID (SGTC)	Cal ID (CYGD)	Cal_Gene (CandiaDB)	KOGs ID	KOGs Catagory	KOGs Description	Cn.H99.v2 Description	Sce_Description (SGD)	Spo_Description (GeneDB)	Cal_Description (CandiaDB)	Cne_OsR-up_2.0	Cne_OsR-dw_2.0	Cne_FxR-up_2.0	Cne_FxR-dw_2.0	Cne_OxR-up_2.0	Cne_OxR-dw_2.0	Cne_SSR-up_2.0	Cne_SSR-dw_2.0	CAN2 BCS 12time	CAN2 Cu 12 time
162.m02715	CNAG_04387	YPR082C	DIB1	SPCC16A11.05c	dim1	orf19.1975	ca0468	DIB1	KOG3414	AD	Component of the U4/U6.U5 snRNP/mitosis protein DIM1	pre-mRNA splicing factor	17-kDa component of the U4/U6aU5 tri-snRNP, plays an essential role in pre-mRNA splicing, orthologue of hDIM1, the human U5-specific 15-kDa protein	U4/U6 x U5 tri-snRNP complex subunit Dim1	Component of the U4/U6.U5 snRNP (by homology)	None	Cne_OsR-dw_2.0	None	None	None	None	None	Cne_OsSR-dw_2.0	0	-0.553
162.m02726	CNAG_04388	YHR008C	SOD2	SPAC1486.01	None	orf19.7111.1	None	None	KOG0876	P	Manganese superoxide dismutase	mitochondrial superoxide dismutase Sod2	Mitochondrial superoxide dismutase, protects cells against oxygen toxicity; phosphorylated	manganese superoxide dismutase (AF069292)	None	None	None	None	None	None	None	None	None	0	-0.543
163.m03860	CNAG_01019	YJR104C	SOD1	SPAC821.10c	sod1	orf19.2770.1	ca4120	SOD1	KOG0441	P	Cu2+/Zn2+ superoxide dismutase SOD1	Cu/Zn superoxide dismutase	Cytosolic superoxide dismutase; some mutations are analogous to those that cause ALS (amyotrophic lateral sclerosis) in humans	superoxide dismutase Sod1	Cu,Zn-superoxide dismutase	None	None	None	None	None	None	None	None	0	1.345
163.m03930	CNAG_00979	YLR411W	CTR3	SPCC1393.10	ctr4	None	None	None	KOG3386	P	Copper transporter	copper uptake transporter	High-affinity copper transporter of the plasma membrane, acts as a trimer; gene is disrupted by a Ty2 transposon insertion in many laboratory strains of S. cerevisiae	copper transporter complex subunit Ctr4	None	None	Cne_OsR-dw_2.0	None	Cne_FxR-dw_2.0	None	Cne_OxR-dw_2.0	None	Cne_CSR-dw_2.0	0	-2.331
177.m02858	CNAG_06968	None	None	None	None	None	None	None	KOG1808	R	AAA ATPase containing von Willebrand factor type A (vWA) domain	hypothetical protein	None	None	None	None	None	None	None	None	Cne_OxR-dw_2.0	None	Cne_OxSR-dw_2.0	0	0.154
177.m03382	CNAG_03465	None	None	None	None	None	None	None	KOG1263	Q	Multicopper oxidases	laccase	None	None	None	None	None	None	None	None	None	None	None	0	1.046
177.m03471	CNAG_03315	YPR165W	RHO1	SPAC1F7.04	rho1	orf19.2843	ca2866	RHO1	KOG0393	R	Ras-related small GTPase, Rho type	Rho1 GTP-binding protein	GTP-binding protein of the rho subfamily of Ras-like proteins, involved in establishment of cell polarity; regulates protein kinase C (Pkc1p) and the cell wall synthesizing enzyme 1,3-beta-glucan synthase (Fks1p and Gsc2p)	Rho family GTPase Rho1	GTP-binding protein of the rho subfamily of ras-like proteins (by homology)	None	None	None	None	None	None	None	None	0	0.194
179.m00343	CNAG_02775	None	None	None	None	None	None	None	None	None	None	conserved hypothetical protein	None	None	None	None	Cne_OsR-dw_2.0	None	None	None	Cne_OxR-dw_2.0	None	None	0	-2.069
183.m01655	CNAG_06356	YKL027W	None	SPAC1A6.10	None	orf19.2115	ca2730	IPF10325	KOG2018	O	Predicted dinucleotide-utilizing enzyme involved in molybdopterin and thiamine biosynthesis	mitochondrial protein	None	Moeb/ThiF domain	molybdopterin-converting factor by homology	None	None	None	None	None	Cne_OxR-dw_2.0	None	Cne_OxSR-dw_2.0	0	0.189
184.m04432	CNAG_00306	None	None	None	None	None	None	None	KOG1836	W	Extracellular matrix glycoprotein Laminin subunits alpha and gamma	conserved hypothetical protein	None	None	None	None	None	None	None	None	None	None	None	0	2.263

## Sheet: Can2-specific genes
Table S3. Genes regulated by differential expression of CAN2 in the CAN2 promoter replacement strain growing in either BCS or Copper-containing medium
Gene ID/ name									Biological function							Stress Response Genes of C. neoformans var. grubii H99								Gene expression
C.neo (JEC21) ID	C.neo (H99) ID	Sce ID	Sce_Gene (SGD)	Spo ID	Spo_Gene (GeneDB)	Cal ID (SGTC)	Cal ID (CYGD)	Cal_Gene (CandiaDB)	KOGs ID	KOGs Catagory	KOGs Description	Cn.H99.v2 Description	Sce_Description (SGD)	Spo_Description (GeneDB)	Cal_Description (CandiaDB)	Cne_OsR-up_2.0	Cne_OsR-dw_2.0	Cne_FxR-up_2.0	Cne_FxR-dw_2.0	Cne_OxR-up_2.0	Cne_OxR-dw_2.0	Cne_SSR-up_2.0	Cne_SSR-dw_2.0	CAN2 BCS 12time	CAN2 Cu 12 time
181.m07807	CNAG_00027	None	None	None	None	None	None	None	None	None	None	transcriptional activator	None	None	None	None	None	None	None	None	None	None	None	0	0.25
181.m07827	CNAG_00054	None	None	None	None	None	None	None	None	None	None	DUF1264 domain-containing protein	None	None	None	None	Cne_OsR-dw_2.0	None	None	Cne_OxR-up_2.0	None	Cne_OxSR-up_2.0	Cne_OsSR-dw_2.0	0	0.308
181.m07930	CNAG_00165	YLR017W	MEU1	SPAC16C9.02c	None	orf19.6938	ca4708	MEU1	KOG3985	F	Methylthioadenosine phosphorylase MTAP	5'-methylthioadenosine phosphorylase	Methylthioadenosine phosphorylase (MTAP), catalyzes the initial step in the methionine salvage pathway; affects polyamine biosynthesis through regulation of ornithine decarboxylase (Spe1p) activity; regulates ADH2 gene expression	S-methyl-5-thioadenosine phosphorylase (predicted)	regulator of ADH2 expression (by homology)	None	None	None	None	None	None	None	None	0	0.313
181.m07936	CNAG_00174	None	None	None	None	None	None	None	KOG1198	CR	Zinc-binding oxidoreductase	conserved hypothetical protein	None	None	None	None	None	None	None	None	None	None	None	0	0.283
181.m08254	CNAG_00515	None	None	None	None	None	None	None	KOG0023	Q	Alcohol dehydrogenase, class V	mannitol dehydrogenase	None	None	None	None	None	None	None	None	None	None	None	0	-0.242
181.m08783	CNAG_00542	None	None	None	None	None	None	None	KOG2614	CR	Kynurenine 3-monooxygenase and related flavoprotein monooxygenases	conserved hypothetical protein	None	None	None	None	None	None	None	None	None	None	None	0	0.76
181.m08356	CNAG_00627	None	None	SPBC23G7.09	matmc_2	None	None	None	KOG0527	K	HMG-box transcription factor	specific transcriptional repressor	None	mating-type m-specific polypeptide mc	None	None	None	None	None	None	None	None	None	0	-0.404
181.m08425	CNAG_00702	None	None	None	None	None	None	None	KOG4698	S	Uncharacterized conserved protein	conserved hypothetical protein	None	None	None	None	None	None	None	None	None	None	None	0	0.285
181.m08506	CNAG_00787	YNL297C	MON2	SPAC23D3.13c	None	orf19.4939	ca3709	IPF7880	KOG1848	S	Uncharacterized conserved protein	conserved hypothetical protein	Peripheral membrane protein with a role in endocytosis and vacuole integrity, interacts with Arl1p and localizes to the endosome; member of the Sec7p family of proteins	guanyl-nucleotide exchange factor (predicted)	unknown function	None	None	None	None	None	None	None	None	0	-0.23
163.m04765	CNAG_00906	None	None	SPCC14G10.02	None	None	None	None	KOG1791	S	Uncharacterized conserved protein	nucleolar protein	None	ribosome biogenesis protein Urb1	None	None	None	None	None	None	None	None	None	0	0.365
163.m03870	CNAG_01037	YPL164C	MLH3	None	None	orf19.7257	ca5372	MLH3	None	None	None	Mlh3p	Protein involved in DNA mismatch repair and crossing-over during meiotic recombination; forms a complex with Mlh1p; mammalian homolog is implicated mammalian microsatellite instability	None	DNA mismatch repair by homology	None	None	None	None	None	None	None	None	0	-0.313
163.m06183	CNAG_01121	None	None	None	None	None	None	None	KOG3644	T	Ligand-gated ion channel	conserved hypothetical protein	None	None	None	None	None	None	None	None	None	None	None	0	0.439
163.m06426	CNAG_01223	YJL079C	PRY1	None	None	orf19.7218	ca5344	PRY2	KOG3017	S	Defense-related protein containing SCP domain	conserved hypothetical protein	Protein of unknown function, has similarity to Pry2p and Pry3p and to the plant PR-1 class of pathogen related proteins	None	putative pathogen related proteins (by homology)	None	None	None	None	None	None	None	None	0	0.458
163.m06442	CNAG_01256	None	None	None	None	None	None	None	KOG1721	R	1 FOG: Zn-finger	conserved hypothetical protein	None	None	None	None	None	None	None	None	None	None	None	0	-0.348
163.m06447	CNAG_01262	YOR212W	STE4	SPBC32H8.07	git5	orf19.799	ca0438	STE4	KOG0286	R	G-protein beta subunit	G-protein beta subunit GPB1	G protein beta subunit, forms a dimer with Ste18p to activate the mating signaling pathway, forms a heterotrimer with Gpa1p and Ste18p to dampen signaling; may recruit Rho1p to the polarized growth site during mating; contains WD40 repeats	heterotrimeric G protein beta subunit Git5	GTP-binding protein beta subunit of the pheromone pathway, 5-prime end (by homology)	None	None	None	None	None	Cne_OxR-dw_2.0	None	Cne_OxSR-dw_2.0	0	0.333
163.m06489	CNAG_01314	YHR202W	None	SPBPB2B2.06c	None	orf19.5342	ca5500	IPF768	KOG4419	F	5' nucleotidase	vacuolar protein	None	phosphoprotein phosphatase (predicted)	unknown function	None	None	None	None	Cne_OxR-up_2.0	None	Cne_OxSR-up_2.0	None	0	-0.83
163.m06526	CNAG_01333	YGL021W	ALK1	SPAC23C4.03	None	None	None	None	KOG2464	D	Serine/threonine kinase (haspin family)	other/Haspin protein kinase	Protein kinase; accumulation and phosphorylation are periodic during the cell cycle; phosphorylated in response to DNA damage; contains characteristic motifs for degradation via the APC pathway; similar to Alk2p and to mammalian haspins	haspin related kinase	None	None	None	None	None	None	None	None	None	0	0.375
163.m06508	CNAG_01337	None	None	SPAC12B10.03	None	None	None	None	KOG2394	R	WD40 protein DMR-N9	WD-repeat protein	None	WD repeat protein, human WDR20 family	None	None	None	None	None	None	None	None	None	0	0.278
179.m00600	CNAG_01474	None	None	None	None	None	None	None	KOG1543	O	Cysteine proteinase Cathepsin L	conserved hypothetical protein	None	None	None	None	None	None	None	None	None	None	None	0	-0.304
179.m00623	CNAG_01475	None	None	None	None	orf19.4831	ca4749	IPF4481	None	None	None	sphingolipid C9-methyltransferase	None	None	unknown function	None	None	None	None	None	None	None	None	0	-0.084
179.m00088	CNAG_01577	YAL062W	GDH3	SPCC622.12c	None	orf19.4716	ca1579	GDH3	KOG2250	E	Glutamate/leucine/phenylalanine/valine dehydrogenases	glutamate dehydrogenase	NADP(+)-dependent glutamate dehydrogenase, synthesizes glutamate from ammonia and alpha-ketoglutarate; rate of alpha-ketoglutarate utilization differs from Gdh1p; expression regulated by nitrogen and carbon sources	NADP-specific glutamate dehydrogenase (predicted)	NADP-glutamate dehydrogenase (by homology)	Cne_OsR-up_2.0	None	None	None	None	None	Cne_OsSR-up_2.0	None	0	0.251
179.m00104	CNAG_01596	None	None	None	None	None	None	None	KOG2873	C	Ubiquinol cytochrome c reductase assembly protein CBP3	conserved hypothetical protein	None	None	None	None	None	None	None	None	Cne_OxR-dw_2.0	None	Cne_OxSR-dw_2.0	0	0.383
176.m02536	CNAG_01858	None	None	None	None	None	None	None	KOG0488	R	Transcription factor BarH and related HOX domain proteins	conserved hypothetical protein	None	None	None	None	None	None	None	None	None	None	None	0	-0.457
176.m02350	CNAG_01873	None	None	None	None	None	None	None	None	None	None	conserved hypothetical protein	None	None	None	None	None	None	None	None	None	None	None	0	-0.36
176.m02353	CNAG_01876	None	None	None	None	orf19.6624	ca4071	IPF2561	KOG1091	U	Ypt/Rab-specific GTPase-activating protein GYP6	TBC1 domain family member 5	None	None	unknown function	None	None	None	None	None	None	None	None	0	0.373
176.m02590	CNAG_01994	None	None	None	None	None	None	None	KOG2084	B	Predicted histone tail methylase containing SET domain	conserved hypothetical protein	None	None	None	None	None	None	None	None	None	None	None	0	-0.237
167.m03709	CNAG_02091	YKR048C	NAP1	SPCC364.06	nap1	orf19.7501	ca5845	NAP1	KOG1507	BD	Nucleosome assembly protein NAP-1	nucleosome assembly protein	Protein that interacts with mitotic cyclin Clb2p; required for the regulation of microtubule dynamics during mitosis; controls bud morphogenesis; involved in the transport of H2A and H2B histones to the nucleus; phosphorylated by CK2	nucleosome assembly protein Nap1 (predicted)	nucleosome assembly protein (by homology)	None	None	None	None	Cne_OxR-up_2.0	None	Cne_OxSR-up_2.0	None	0	0.343
167.m03576	CNAG_02099	YKL182W	FAS1	SPAC926.09c	fas1	orf19.979	ca5426	FAS1	None	None	None	fatty acid synthase beta subunit	Beta subunit of fatty acid synthetase, which catalyzes the synthesis of long-chain saturated fatty acids; contains acetyltransacylase, dehydratase, enoyl reductase, malonyl transacylase, and palmitoyl transacylase activities	fatty acid synthase beta subunit Fas1	Fatty-acyl-CoA synthase, beta chain.	None	None	None	Cne_FxR-dw_2.0	None	Cne_OxR-dw_2.0	None	None	0	0.453
167.m05919	CNAG_02314	None	None	None	None	None	None	None	KOG2181	K	LIM domain binding protein LDB1/NLI/CLIM	conserved hypothetical protein	None	None	None	None	None	None	Cne_FxR-dw_2.0	None	None	None	Cne_FxSR-dw_2.0	0	-0.358
167.m03357	CNAG_02337	YHR128W	FUR1	SPAC1B3.01c	None	orf19.2640	ca2069	FUR1	KOG4203	TZ	Armadillo/beta-Catenin/plakoglobin	uracil phosphoribosyltransferase 1	Uracil phosphoribosyltransferase, synthesizes UMP from uracil; involved in the pyrimidine salvage pathway	uracil phosphoribosyltransferase (predicted)	Uracil phosphoribosyltransferase (by homology)	None	None	None	None	None	None	None	None	0	0.585
167.m03351	CNAG_02349	None	None	None	None	None	None	None	KOG4341	R	F-box protein containing LRR	conserved hypothetical protein	None	None	None	None	None	None	None	Cne_OxR-up_2.0	None	Cne_OxSR-up_2.0	None	0	0.299
167.m03317	CNAG_02389	None	None	None	None	None	None	None	KOG0694	T	Serine/threonine protein kinase	AGC-group protein kinase	None	None	None	None	None	None	None	None	None	None	None	0	-0.411
167.m03673	CNAG_02540	None	None	None	None	None	None	None	KOG2533	G	Permease of the major facilitator superfamily	conserved hypothetical protein	None	None	None	None	Cne_OsR-dw_2.0	None	None	Cne_OxR-up_2.0	None	Cne_OxSR-up_2.0	Cne_OsSR-dw_2.0	0	0.435
167.m05754	CNAG_02552	None	None	None	None	None	None	None	KOG0523	G	Transketolase	transketolase	None	None	None	None	None	None	None	Cne_OxR-up_2.0	None	Cne_OxSR-up_2.0	None	0	-0.33
176.m02221	CNAG_02594	None	None	None	None	None	None	None	KOG0307	U	Vesicle coat complex COPII, subunit SEC31	conserved hypothetical protein	None	None	None	None	None	None	None	None	None	None	None	0	0.409
176.m02527	CNAG_02674	None	None	None	None	orf19.4046	ca2491	IPF7221	KOG0324	S	Uncharacterized conserved protein	dJ347H13.4	None	None	unknown function	None	None	None	None	None	None	None	None	0	-0.293
179.m00319	CNAG_02741	YKL134C	^OCT1	SPAC1F3.10c	40087	orf19.1195	ca1374	MIP1	KOG2090	O	Metalloendopeptidase family - mitochondrial intermediate peptidase	mitochondrial intermediate peptidase	Mitochondrial intermediate peptidase, cleaves N-terminal residues of a subset of proteins upon import, after their cleavage by mitochondrial processing peptidase (Mas1p-Mas2p); may contribute to mitochondrial iron homeostasis	mitochondrial intermediate peptidase Oct1 (predicted)	Mitochondrial intermediate peptidase (by homology)	None	None	None	None	None	None	None	None	0	0.399
179.m00499	CNAG_02958	None	None	None	None	orf19.4213	ca2922	FET31	KOG1263	Q	Multicopper oxidases	ferroxidase	None	None	cell surface ferroxidase (by homology)	None	Cne_OsR-dw_2.0	None	None	None	None	None	Cne_OsSR-dw_2.0	0	0.549
179.m00035	CNAG_03052	YBL056W	PTC3	SPCC1223.11	ptc2	orf19.2538	ca0047	PTC2	KOG0698	T	Serine/threonine protein phosphatase	PP2Cc protein phosphatase	Type 2C protein phosphatase; dephosphorylates Hog1p (see also Ptc2p) to limit maximal kinase activity induced by osmotic stress; dephosphorylates T169 phosphorylated Cdc28p (see also Ptc2p); role in DNA checkpoint inactivation	protein phosphatase 2C Ptc2	Protein phosphatase type 2C (by homology)	None	None	None	None	None	None	None	None	0	0.229
179.m00613	CNAG_03057	None	None	None	None	None	None	None	KOG1216	WV	von Willebrand factor and related coagulation proteins	conserved hypothetical protein	None	None	None	None	None	None	None	None	None	None	None	0	-0.319
179.m00011	CNAG_03081	YGL064C	MRH4	None	None	None	None	None	KOG0335	A	ATP-dependent RNA helicase	RNA helicase	Mitochondrial ATP-dependent RNA helicase of the DEAD-box family, plays an essential role in mitochondrial function	None	None	None	None	None	None	None	None	None	None	0	0.217
177.m03353	CNAG_03258	None	None	None	None	None	None	None	KOG0616	T	cAMP-dependent protein kinase catalytic subunit (PKA)	AGC-group protein kinase	None	None	None	None	None	None	None	None	None	None	None	0	0.277
177.m03441	CNAG_03384	None	None	None	None	None	None	None	None	None	None	conserved hypothetical protein	None	None	None	None	None	None	None	None	None	None	None	0	-0.477
177.m03002	CNAG_03433	None	None	None	None	None	None	None	None	None	None	endo alpha-1,4 polygalactosaminidase precusor	None	None	None	None	None	None	None	None	None	None	None	0	0.445
177.m02973	CNAG_03465	None	None	None	None	None	None	None	KOG1263	Q	Multicopper oxidases	laccase	None	None	None	None	None	None	None	None	None	None	None	0	0.784
177.m02915	CNAG_03532	YLL056C	None	SPBC2A9.02	None	None	None	None	KOG1502	V	Flavonol reductase/cinnamoyl-CoA reductase	3-beta hydroxysteroid dehydrogenase/isomerase	None	NAD dependent epimerase/dehydratase family protein	None	None	None	None	None	None	None	None	None	0	0.391
177.m03373	CNAG_03544	None	None	None	None	orf19.6607	ca3847	IPF7942	None	None	None	conserved hypothetical protein	None	None	NADH-ubiquinone oxidoreductase	None	None	None	None	None	Cne_OxR-dw_2.0	None	Cne_OxSR-dw_2.0	0	0.259
186.m03566	CNAG_03644	None	None	None	None	None	None	None	None	None	None	CAS3p	None	None	None	None	None	None	None	None	None	None	None	0	-0.461
186.m04041	CNAG_03734	None	None	None	None	None	None	None	KOG2748	B	Uncharacterized conserved protein, contains chromo domain	conserved hypothetical protein	None	None	None	None	None	None	None	None	None	None	None	0	-0.28
186.m03748	CNAG_03823	YOL133W	HRT1	SPAC23H4.18c	rbx1	orf19.233.1	None	None	KOG2930	O	SCF ubiquitin ligase, Rbx1 component	ubiquitin-protein ligase	RING finger containing subunit of Skp1-Cullin-F-box ubiquitin protein ligases (SCF); required for Gic2p, Far1p, Sic1p and Cln2p degradation; may tether Cdc34p (a ubiquitin conjugating enzyme or E2) and Cdc53p (a cullin) subunits of SCF	RING-box protein 1	None	None	None	None	None	None	None	None	None	0	0.289
186.m03767	CNAG_03842	None	None	None	None	None	None	None	None	None	None	conserved hypothetical protein	None	None	None	None	None	None	None	None	None	None	None	0	-0.411
186.m03770	CNAG_03844	None	None	None	None	None	None	None	None	None	None	nonselective cation channel	None	None	None	None	None	None	None	None	None	None	None	0	0.272
186.m03809	CNAG_03877	None	None	None	None	None	None	None	KOG2740	U	Clathrin-associated protein medium chain	adaptor complex subunit medium chain 3	None	None	None	None	None	None	None	None	None	None	None	0	0.304
186.m03829	CNAG_03901	YPL060W	LPE10	SPBC25H2.08c	mrs2	orf19.2597	ca2271	MRS2	KOG2662	P	Magnesium transporters: CorA family	magnesium ion transporter	Mitochondrial inner membrane magnesium transporter, involved in maintenance of magnesium concentrations inside mitochondria; indirectly affects splicing of group II introns; functionally and structurally related to Mrs2p	magnesium ion transporter Mrs2	Mitochondrial RNA splicing protein (by homology)	None	None	None	None	Cne_OxR-up_2.0	None	Cne_OxSR-up_2.0	None	0	-0.234
186.m03839	CNAG_03915	YHL026C	None	SPCC594.02c	None	None	None	None	None	None	None	conserved hypothetical protein	None	conserved fungal protein	None	None	None	None	None	None	None	None	None	0	-0.23
186.m03842	CNAG_03917	None	None	SPBC17G9.04c	nup85	None	None	None	KOG2271	YU	Nuclear pore complex component (sc Nup85)	conserved hypothetical protein	None	nucleoporin Nup85	None	None	None	None	None	None	None	None	None	0	-0.31
186.m03845	CNAG_03919	YDR511W	ACN9	SPBP23A10.03c	None	orf19.6328	ca3294	IPF5725	KOG4100	S	Uncharacterized conserved protein	acetate non-utilizing protein 9	Protein of the mitochondrial intermembrane space, required for acetate utilization and gluconeogenesis; has orthologs in higher eukaryotes	ACN9 family mitochondrial protein	unknown function	None	None	None	None	Cne_OxR-up_2.0	None	Cne_OxSR-up_2.0	None	0	0.283
186.m03849	CNAG_03921	None	None	None	None	None	None	None	None	None	None	conserved hypothetical protein	None	None	None	None	None	None	None	None	None	None	None	0	-0.326
186.m03856	CNAG_03929	YML038C	YMD8	SPAC22E12.01	None	orf19.6480	ca1995	IPF6612	KOG1443	S	Predicted integral membrane protein	Cas42p	Putative nucleotide sugar transporter, has similarity to Vrg4p	membrane transporter (predicted)	unknown function	None	None	None	None	Cne_OxR-up_2.0	None	Cne_OxSR-up_2.0	None	0	0.363
186.m03909	CNAG_03992	None	None	None	None	None	None	None	None	None	None	GTP-binding protein 1	None	None	None	None	Cne_OsR-dw_2.0	None	Cne_FxR-dw_2.0	Cne_OxR-up_2.0	None	Cne_OxSR-up_2.0	None	0	-0.326
186.m03911	CNAG_03994	YDR435C	PPM1	SPBP8B7.08c	None	orf19.6377	ca3541	IPF5425	KOG2918	O	Carboxymethyl transferase	leucine carboxyl methyltransferase 1	Carboxyl methyl transferase, methylates the C terminus of the protein phosphatase 2A catalytic subunit (Pph21p or Pph22p), which is important for complex formation with regulatory subunits	leucine carboxyl methyltransferase (predicted)	similar to Saccharomyces cerevisiae Ppm1p carboxy methyltransferase (by homology)	None	None	None	None	None	None	None	None	0	-0.185
186.m03914	CNAG_03996	YEL042W	GDA1	SPAC824.08	gda1	orf19.7394	ca5693	GDA1	KOG1385	F	Nucleoside phosphatase	guanosine-diphosphatase	Guanosine diphosphatase located in the Golgi, involved in the transport of GDP-mannose into the Golgi lumen by converting GDP to GMP after mannose is transferred its substrate	guanosine-diphosphatase Gda1	Golgi guanosine diphosphatase (by homology)	None	None	None	None	None	None	None	None	0	0.491
186.m03966	CNAG_04036	None	None	None	None	None	None	None	KOG0627	K	Heat shock transcription factor	conserved hypothetical protein	None	None	None	None	None	None	None	None	None	None	None	0	-0.268
186.m04003	CNAG_04074	YGL137W	SEC27	SPBC16C6.13c	sec27	orf19.3467	ca2033	SEC27	KOG0276	U	Vesicle coat complex COPI, beta' subunit	coatomer beta' subunit	Essential beta'-coat protein of the COPI coatomer, involved in ER-to-Golgi and Golgi-to-ER transport; contains WD40 domains that mediate cargo selective interactions; 45% sequence identity to mammalian beta'-COP	coatomer beta' subunit (predicted)	coatomer complex beta chain (beta -cop) of secretory pathway vesicles (by homology)	None	None	None	None	None	None	None	None	0	0.295
186.m04013	CNAG_04090	None	None	SPBC29B5.01	atf1	orf19.1032	ca1627	SKO1.3f	KOG1414	K	Transcriptional activator FOSB/c-Fos and related bZIP transcription factors	activating transcription factor 2	None	transcription factor Atf1	Cre-binding bzip protein, 3-prime end (by homology)	None	None	None	None	None	None	None	None	0	0.347
162.m02662	CNAG_04448	YBR084C-A	RPL19A	SPCC1682.14	rpl1902	orf19.5904	ca6141	RPL19A	KOG1696	J	60s ribosomal protein L19	60S ribosomal protein L19	Protein component of the large (60S) ribosomal subunit, nearly identical to Rpl19Bp and has similarity to rat L19 ribosomal protein; rpl19a and rpl19b single null mutations result in slow growth, while the double null mutation is lethal	60S ribosomal protein L19B	Ribosomal protein L19.e (by homology)	None	None	None	None	None	Cne_OxR-dw_2.0	None	Cne_OxSR-dw_2.0	0	0.277
185.m02444	CNAG_04662	YPR135W	CTF4	SPAPB1E7.02c	mcl1	orf19.6247	ca0964	IPF9141	KOG1274	R	WD40 repeat protein	sepB	Chromatin-associated protein, required for sister chromatid cohesion; interacts with DNA polymerase alpha (Pol1p) and may link DNA synthesis to sister chromatid cohesion	DNA polymerase alpha accessory factor Mcl1	similar to Saccharomyces cerevisiae Ctf4p DNA-directed DNA polymerase alpha-binding protein (by homology)	None	None	None	None	None	None	None	None	0	-0.264
185.m02743	CNAG_04727	None	None	None	None	None	None	None	KOG4194	T	Membrane glycoprotein LIG-1	conserved hypothetical protein	None	None	None	None	Cne_OsR-dw_2.0	None	None	Cne_OxR-up_2.0	None	Cne_OxSR-up_2.0	Cne_OsSR-dw_2.0	0	-0.212
185.m02583	CNAG_04813	YHR026W	PPA1	SPAC2C4.13	vma16	orf19.4954	ca0512	VMA16	KOG0233	C	Vacuolar H+-ATPase V0 sector, subunit c''	hydrogen-transporting ATPase	Subunit c'' of the vacuolar ATPase, which functions in acidification of the vacuole; one of three proteolipid subunits of the V0 domain	V-type ATPase subunit c''	H+-ATPase 23 KD subunit, vacuolar (by homology)	None	None	None	None	None	None	None	None	0	-0.182
185.m02607	CNAG_04837	None	None	None	None	orf19.2315	ca3300	RTG3	KOG1318	K	Helix loop helix transcription factor EB	conserved hypothetical protein	None	None	Probable bHLH/zip transcription factor that regulates CIT2 gene expression (by homology)	None	None	None	None	None	None	None	None	0	0.422
184.m04981	CNAG_04946	None	None	None	None	None	None	None	KOG2820	R	FAD-dependent oxidoreductase	conserved hypothetical protein	None	None	None	None	None	None	None	None	None	None	None	0	-0.384
184.m04959	CNAG_04967	None	None	None	None	None	None	None	KOG0103	O	Molecular chaperones HSP105/HSP110/SSE1, HSP70 superfamily	conserved hypothetical protein	None	None	None	None	None	None	None	None	None	None	None	0	-0.248
184.m04872	CNAG_05066	None	None	None	None	None	None	None	KOG1721	R	1 FOG: Zn-finger	conserved hypothetical protein	None	None	None	None	None	None	None	None	None	None	None	0	-0.399
184.m05030	CNAG_05109	None	None	SPAC24C9.05c	mug70	orf19.5238	ca5008	IPF12577	None	None	None	CBS and PB1 domain-containing protein	None	conserved protein (fungal and plant)	unknown function	None	Cne_OsR-dw_2.0	None	Cne_FxR-dw_2.0	None	Cne_OxR-dw_2.0	None	Cne_CSR-dw_2.0	0	0.309
184.m04826	CNAG_05119	YKL174C	TPO5	None	None	orf19.151	ca0144	IPF19195.3f	KOG1289	E	Amino acid transporters	GabA permease	Protein involved in excretion of putrescine and spermidine; putative polyamine transporter in the Golgi or post-Golgi vesicles	None	putative amino acid or GABA permease, 3-prime end (by homology)	None	None	None	None	None	None	None	None	0	0.222
184.m04802	CNAG_05144	YNL036W	NCE103	None	None	orf19.1721	ca2796	IPF8405	KOG1578	P	Predicted carbonic anhydrase involved in protection against oxidative damage	carbonic anhydrase 2	Carbonic anhydrase; poorly transcribed under aerobic conditions and at an undetectable level under anaerobic conditions; involved in non-classical protein export pathway	None	similar to Saccharomyces cerevisiae Nce103p involved in non-classical protein export pathway (by homology)	None	None	None	None	Cne_OxR-up_2.0	None	Cne_OxSR-up_2.0	None	0	-3.205
184.m04793	CNAG_05155	YER075C	PTP3	SPAC26F1.10c	pyp1	orf19.7610	ca6009	IPF643	KOG0789	T	Protein tyrosine phosphatase	protein-tyrosine-phosphatase	Phosphotyrosine-specific protein phosphatase involved in the inactivation of mitogen-activated protein kinase (MAPK) during osmolarity sensing; dephosporylates Hog1p MAPK and regulates its localization; localized to the cytoplasm	tyrosine phosphatase Pyp1	similar to Saccharomyces cerevisiae Ptp3p protein tyrosine phosphatase (by homology)	None	None	None	None	None	None	None	None	0	0.397
184.m04765	CNAG_05191	YOR154W	SLP1	SPBC3E7.09	None	orf19.4738	ca1944	IPF10645	KOG1396	S	Uncharacterized conserved protein	conserved hypothetical protein	Integral membrane protein of unknown function; member of the SUN-like family of proteins	Sad1-UNC-like C-terminal	unknown function	None	None	Cne_FxR-up_2.0	None	None	None	Cne_FxSR-up_2.0	None	0	-0.316
184.m04759	CNAG_05195	YDL190C	UFD2	SPAC20H4.10	ufd2	orf19.5965	ca6091	UFD2	KOG2042	O	Ubiquitin fusion degradation protein-2	ubiquitin fusion degradation protein-2	Ubiquitin chain assembly factor (E4) that cooperates with a ubiquitin-activating enzyme (E1), a ubiquitin-conjugating enzyme (E2), and a ubiquitin protein ligase (E3) to conjugate ubiquitin to substrates; also functions as an E3	ubiquitin-protein ligase E4 (predicted)	Ubiquitin fusion degradation protein 2 (by homology)	None	None	None	None	None	None	None	None	0	0.307
184.m04720	CNAG_05243	YGR194C	XKS1	SPCPJ732.02c	None	orf19.1290	None	None	KOG2531	G	Sugar (pentulose and hexulose) kinases	xylulokinase	Xylulokinase, converts D-xylulose and ATP to xylulose 5-phosphate and ADP; rate limiting step in fermentation of xylulose; required for xylose fermentation by recombinant S. cerevisiae strains	xylulose kinase (predicted)	None	None	None	None	None	None	None	None	None	0	0.12
184.m05024	CNAG_05248	YKL135C	APL2	SPBC947.02	apl2	orf19.231	ca0321	APL2	KOG1061	U	Vesicle coat complex AP-1/AP-2/AP-4, beta subunit	clathrin binding protein	Beta-adaptin, large subunit of the clathrin-associated protein (AP-1) complex; binds clathrin; involved in clathrin-dependent Golgi protein sorting	AP-1 adaptor complex subunit Apl2 (predicted)	AP-1 complex subunit, beta1-adaptin (by homology)	None	None	None	None	None	Cne_OxR-dw_2.0	None	Cne_OxSR-dw_2.0	0	-0.218
184.m05134	CNAG_05259	None	None	None	None	None	None	None	None	None	None	conserved hypothetical protein	None	None	None	None	None	None	None	None	None	None	None	0	-0.393
184.m04690	CNAG_05273	YMR009W	ADI1	SPBC887.01	None	orf19.2306	ca3311	IPF8809	KOG2107	S	Uncharacterized conserved protein, contains double-stranded beta-helix domain	1,2-dihydroxy-3-keto-5-methylthiopentene dioxygenase	Acireductone dioxygenease involved in the methionine salvage pathway; ortholog of human MTCBP-1; transcribed with YMR010W and regulated post-transcriptionally by RNase III (Rnt1p) cleavage; ADI1 mRNA is induced in heat shock conditions	acireductone dioxygenase family	unknown function	None	None	None	None	None	Cne_OxR-dw_2.0	None	Cne_OxSR-dw_2.0	0	-0.309
184.m04363	CNAG_05373	None	None	None	None	None	None	None	KOG3949	BK	RNA polymerase II elongator complex, subunit ELP4	conserved hypothetical protein	None	None	None	None	None	None	None	None	None	None	None	0	0.356
184.m04415	CNAG_05429	None	None	None	None	None	None	None	KOG4534	S	Uncharacterized conserved protein	conserved hypothetical protein	None	None	None	None	None	None	None	None	None	None	None	0	0.375
184.m04563	CNAG_05586	None	None	None	None	None	None	None	KOG3656	R	FOG: 7 transmembrane receptor	conserved hypothetical protein	None	None	None	None	None	None	None	None	None	None	None	0	-0.363
180.m00280	CNAG_05885	None	None	None	None	None	None	None	None	None	None	conserved hypothetical protein	None	None	None	None	None	None	None	None	None	None	None	0	-0.372
180.m00286	CNAG_05893	None	None	None	None	None	None	None	KOG1257	C	NADP+-dependent malic enzyme	conserved hypothetical protein	None	None	None	None	None	None	None	None	None	None	None	0	0.259
180.m00269	CNAG_05931	YJL059W	YHC3	SPAC607.09c	btn1	orf19.4059	ca1483	YHC3	KOG3880	R	Predicted small molecule transporter involved in cellular pH homeostasis (Batten disease protein in human)	basic amino acid transporter	Vacuolar membrane protein involved in the ATP-dependent transport of arginine into the vacuole and possibly in balancing ion homeostasis; homolog of human CLN3 involved in Batten disease (juvenile onset neuronal ceroid lipofuscinosis)	battenin CLN3 family protein	involved in cellular pH homeostasis (by homology)	None	None	None	None	None	None	None	None	0	-0.172
180.m00005	CNAG_05976	YOR310C	NOP58	SPAC23G3.06	None	orf19.1199	ca1438	NOP58	KOG2572	AJ	Ribosome biogenesis protein - Nop58p/Nop5p	SnoRNA binding domain containing protein	Protein involved in pre-rRNA processing, 18S rRNA synthesis, and snoRNA synthesis; component of the small subunit processome complex, which is required for processing of pre-18S rRNA	U3 snoRNP protein Nop58 (predicted)	nucleolar protein required for pre-18S rRNA processing	Cne_OsR-up_2.0	None	None	None	None	Cne_OxR-dw_2.0	Cne_OsSR-up_2.0	Cne_OxSR-dw_2.0	0	-0.338
183.m01822	CNAG_06290	YLR081W	GAL2	None	None	None	None	None	KOG0254	R	Predicted transporter (major facilitator superfamily)	sugar transporter	Galactose permease, required for utilization of galactose; also able to transport glucose	None	None	None	Cne_OsR-dw_2.0	None	Cne_FxR-dw_2.0	None	None	None	None	0	-0.442
183.m01839	CNAG_06322	None	None	None	None	None	None	None	KOG2747	B	Histone acetyltransferase (MYST family)	conserved hypothetical protein	None	None	None	None	None	None	None	None	None	None	None	0	0.333
183.m01724	CNAG_06433	YBR222C	PCS60	SPCC1827.03c	None	None	None	None	KOG1176	I	Acyl-CoA synthetase	AMP binding protein	Peroxisomal AMP-binding protein, localizes to both the peroxisomal peripheral membrane and matrix, expression is highly inducible by oleic acid, similar to E. coli long chain acyl-CoA synthetase	acetyl-CoA ligase (predicted)	None	None	None	None	None	None	None	None	None	0	-0.412
180.m00460	CNAG_06537	None	None	None	None	None	None	None	None	None	None	monocarboxylic acid transporter	None	None	None	None	None	None	None	None	None	None	None	0	-0.315
180.m00223	CNAG_06560	None	None	None	None	None	None	None	KOG1515	V	Arylacetamide deacetylase	esterase	None	None	None	None	None	Cne_FxR-up_2.0	None	Cne_OxR-up_2.0	None	None	None	0	0.256
180.m02954	CNAG_06596	None	None	None	None	None	None	None	None	None	None	conserved hypothetical protein	None	None	None	None	None	None	None	None	None	None	None	0	0.393
180.m00165	CNAG_06668	YNR018W	AIM38	None	None	None	None	None	None	None	None	mitochondrial protein	Putative protein of unknown function; non-tagged protein is detected in purified mitochondria; null mutant displays decreased frequency of mitochondrial genome loss (petite formation) and severe growth defect in minimal glycerol media	None	None	None	None	None	Cne_FxR-dw_2.0	None	None	None	Cne_FxSR-dw_2.0	0	0.538
186.m03498	CNAG_06717	None	None	SPAC1A6.09c	lag1	orf19.7354	ca5652	IPF19815	KOG1607	U	Protein transporter of the TRAM (translocating chain-associating membrane) superfamily	longevity-assurance protein	None	sphingosine N-acyltransferase Lag1	longevity-assurance protein (by homology)	None	None	None	None	None	None	None	None	0	-0.365
186.m03441	CNAG_06769	YOR330C	MIP1	SPCC24B10.22	None	orf19.3431	ca4033	IPF19795	KOG3657	L	Mitochondrial DNA polymerase gamma, catalytic subunit	gamma DNA-directed DNA polymerase	Catalytic subunit of the mitochondrial DNA polymerase; conserved C-terminal segment is required for the maintenance of mitochondrial genome.	mitochondrial DNA polymerase gamma catalytic subunit	similar to Saccharomyces cerevisiae Mip1p DNA-directed DNA polymerase gamma catalytic subunit, mitochondrial (by homology)	None	None	None	None	None	None	None	None	0	-0.306
181.m07973	CNAG_07330	None	None	None	None	None	None	None	KOG0099	T	G protein subunit Galphas, small G protein superfamily	conserved hypothetical protein	None	None	None	None	None	None	None	None	None	None	None	0	-0.381
163.m06225	CNAG_07422	None	None	None	None	None	None	None	KOG1225	TW	Teneurin-1 and related extracellular matrix proteins, contain EGF-like repeats	delayed-type hypersensitivity antigen	None	None	None	None	None	None	None	None	None	None	None	0	0.241
186.m03496	CNAG_07465	None	None	None	None	None	None	None	KOG4168	K	Predicted RNA polymerase III subunit C17	conserved hypothetical protein	None	None	None	None	None	None	None	None	Cne_OxR-dw_2.0	None	Cne_OxSR-dw_2.0	0	-0.449
176.m02252	CNAG_07558	YKL117W	SBA1	SPAC9E9.13	wos2	orf19.5749	ca0896	SBA1	KOG3158	O	HSP90 co-chaperone p23	wos2 protein	Co-chaperone that binds to and regulates Hsp90 family chaperones; important for pp60v-src activity in yeast; homologous to the mammalian p23 proteins and like p23 can regulate telomerase activity	p23 homolog	Hsp90 (Ninety) Associated Co-chaperone (by homology)	None	None	None	None	None	Cne_OxR-dw_2.0	None	Cne_OxSR-dw_2.0	0	0.163
167.m05803	CNAG_07625	YGR266W	None	None	None	orf19.3983	ca3406	IPF9711	None	None	None	plasma membrane protein	None	None	unknown function	None	None	None	None	None	None	None	None	0	-0.287
184.m04760	CNAG_07641	None	None	None	None	None	None	None	KOG0254	R	Predicted transporter (major facilitator superfamily)	monosaccharide transporter	None	None	None	None	None	None	None	None	None	None	None	0	-0.348
180.m00013	CNAG_07700	None	None	None	None	None	None	None	KOG0017	R	FOG: Transposon-encoded proteins with TYA, reverse transcriptase, integrase domains in various combinations	conserved hypothetical protein	None	None	None	None	None	None	None	None	None	None	None	0	-0.332
179.m00044	CNAG_07789	None	None	None	None	None	None	None	KOG0351	L	ATP-dependent DNA helicase	conserved hypothetical protein	None	None	None	None	None	None	None	None	None	None	None	0	-0.724
184.m04961	CNAG_07798	None	None	None	None	None	None	None	None	None	None	amidohydrolase 3	None	None	None	None	None	None	None	None	None	None	None	0	-0.426
184.m04644	CNAG_07830	None	None	None	None	None	None	None	None	None	None	conserved hypothetical protein	None	None	None	None	None	None	None	None	None	None	None	0	0.479
184.m04352	CNAG_07871	YPL031C	PHO85	SPCC16C4.11	pef1	orf19.6846	ca4448	PHO85	KOG0594	R	Protein kinase PCTAIRE and related kinases	CMGC/CDK protein kinase	Cyclin-dependent kinase, with ten cyclin partners; involved in regulating the cellular response to nutrient levels and environmental conditions and progression through the cell cycle	Pho85/PhoA-like cyclin-dependent kinase Pef1	Negative regulator of PHO system	None	None	None	None	None	None	None	None	0	-0.144
162.m02197	None	None	None	None	None	None	None	None	None	None	None	None	None	None	None	None	None	None	None	None	None	None	None	0	0.331
162.m02497	None	None	None	None	None	None	None	None	None	None	None	None	None	None	None	None	None	None	None	None	None	None	None	0	-0.409
162.m02604	None	None	None	None	None	None	None	None	None	None	None	None	None	None	None	None	None	None	None	None	None	None	None	0	-0.567
164.m02533	None	None	None	None	None	None	None	None	None	None	None	None	None	None	None	None	None	None	None	None	None	None	None	0	-0.679
176.m02377	None	None	None	None	None	None	None	None	None	None	None	None	None	None	None	None	None	None	None	None	None	None	None	0	-0.741
176.m02416	None	None	None	None	None	None	None	None	None	None	None	None	None	None	None	None	None	None	None	None	None	None	None	0	-0.408
179.m00718	None	None	None	None	None	None	None	None	None	None	None	None	None	None	None	None	None	None	None	None	None	None	None	0	-0.423
181.m08012	None	None	None	None	None	None	None	None	None	None	None	None	None	None	None	None	None	None	None	None	None	None	None	0	-0.31
181.m08050	None	None	None	None	None	None	None	None	None	None	None	None	None	None	None	None	None	None	None	Cne_OxR-up_2.0	None	Cne_OxSR-up_2.0	None	0	2.195
183.m01621	None	None	None	None	None	None	None	None	None	None	None	None	None	None	None	None	None	None	None	None	None	None	None	0	0.525
184.m04687	None	None	None	None	None	None	None	None	None	None	None	None	None	None	None	None	None	None	None	None	None	None	None	0	-0.274
184.m05170	None	None	None	None	None	None	None	None	None	None	None	None	None	None	None	None	None	None	None	None	None	None	None	0	-0.341
185.m02740	None	None	None	None	None	None	None	None	None	None	None	None	None	None	None	None	None	None	None	None	None	None	None	0	-0.379
