# Supplementary material for: Comparative Transcriptome Analysis of the CO2 Sensing Pathway Via Differential Expression of Carbonic Anhydrase in Cryptococcus neoformans
Source: Oxford University Press journal article supplement (doi:10.1534/genetics.110.118315), 2010-06-03
Supplement: tables4.xls [file tables4.xls]

## Sheet: H99 BCS Cu ANOVA
Table S4. Genes regulated by differential expression of CAN2 between the wild-type strain and the CAN2 promoter replacement strain growing in BCS-containing medium
Gene ID/ name									Biological function							Stress Response Genes of C. neoformans var. grubii H99								Gene expression
C.neo (JEC21) ID	C.neo (H99) ID	Sce ID	Sce_Gene (SGD)	Spo ID	Spo_Gene (GeneDB)	Cal ID (SGTC)	Cal ID (CYGD)	Cal_Gene (CandiaDB)	KOGs ID	KOGs Catagory	KOGs Description	Cn.H99.v2 Description	Sce_Description (SGD)	Spo_Description (GeneDB)	Cal_Description (CandiaDB)	Cne_OsR-up_2.0	Cne_OsR-dw_2.0	Cne_FxR-up_2.0	Cne_FxR-dw_2.0	Cne_OxR-up_2.0	Cne_OxR-dw_2.0	Cne_SSR-up_2.0	Cne_SSR-dw_2.0	H99 BCS 12 time	H99 Cu 12 time
164.m02085	CNAG_06088	YLR027C	AAT2	None	None	orf19.3554	ca2661	AAT1	KOG1411	E	Aspartate aminotransferase/Glutamic oxaloacetic transaminase AAT1/GOT2	aspartate aminotransferase	Cytosolic aspartate aminotransferase, involved in nitrogen metabolism; localizes to peroxisomes in oleate-grown cells	None	aspartate aminotransferase (by homology)	None	None	None	Cne_FxR-dw_2.0	None	Cne_OxR-dw_2.0	None	None	0.156	-0.178
177.m02912	CNAG_07745	YMR083W	ADH3	None	None	orf19.3997	ca4765	ADH1	KOG0023	Q	Alcohol dehydrogenase, class V	mannitol-1-phosphate dehydrogenase	Mitochondrial alcohol dehydrogenase isozyme III; involved in the shuttling of mitochondrial NADH to the cytosol under anaerobic conditions and ethanol production	None	alcohol dehydrogenase (by homology)	None	Cne_OsR-dw_2.0	None	Cne_FxR-dw_2.0	None	Cne_OxR-dw_2.0	None	Cne_CSR-dw_2.0	0.378	-0.097
177.m03313	CNAG_07745	YMR083W	ADH3	None	None	orf19.3997	ca4765	ADH1	KOG0023	Q	Alcohol dehydrogenase, class V	mannitol-1-phosphate dehydrogenase	Mitochondrial alcohol dehydrogenase isozyme III; involved in the shuttling of mitochondrial NADH to the cytosol under anaerobic conditions and ethanol production	None	alcohol dehydrogenase (by homology)	None	Cne_OsR-dw_2.0	None	Cne_FxR-dw_2.0	None	Cne_OxR-dw_2.0	None	Cne_CSR-dw_2.0	0.367	-0.131
177.m02985	CNAG_03452	YEL052W	AFG1	SPBC115.02c	None	orf19.2891	ca3775	AFG1	KOG2383	R	Predicted ATPase	AFG1 family mitochondrial ATPase	Conserved protein that may act as a chaperone in the degradation of misfolded or unassembled cytochrome c oxidase subunits; localized to matrix face of the mitochondrial inner membrane; member of the AAA family but lacks a protease domain	AFG1 family mitochondrial ATPase	ATPase family gene (by homology)	None	None	None	None	None	None	None	None	0.341	-0.375
181.m08049	CNAG_00305	YDR214W	AHA1	SPBC1711.08	None	orf19.7602	ca6002	IPF661	KOG2936	S	Uncharacterized conserved protein	chaperone activator	Co-chaperone that binds to Hsp82p and activates its ATPase activity; similar to Hch1p; expression is regulated by stresses such as heat shock	chaperone activator Aha1 (predicted)	unknown function	None	None	None	None	None	Cne_OxR-dw_2.0	None	Cne_OxSR-dw_2.0	0.359	-0.085
163.m03786	CNAG_00891	YER036C	ARB1	SPBC16H5.08c	None	orf19.2183	ca3736	IPF5533	KOG0927	R	Predicted transporter (ABC superfamily)	ATP-binding cassette transporter	ATPase of the ATP-binding cassette (ABC) family involved in 40S and 60S ribosome biogenesis, has similarity to Gcn20p; shuttles from nucleus to cytoplasm, physically interacts with Tif6p, Lsg1p	ribosome biogenesis ATPase, Arb family (predicted)	ABC transporter (by homology)	Cne_OsR-up_2.0	None	None	None	None	Cne_OxR-dw_2.0	Cne_OsSR-up_2.0	Cne_OxSR-dw_2.0	0.328	-0.004
163.m06205	CNAG_01147	YKL013C	ARC19	SPAC6G9.07c	arc4	orf19.3251	ca5448	ARC19.3f	KOG1876	Z	Actin-related protein Arp2/3 complex, subunit ARPC4	ARP2/3 complex 20 kDa subunit	Subunit of the ARP2/3 complex, which is required for the motility and integrity of cortical actin patches	ARP2/3 actin-organizing complex subunit Arc4	subunit of the Arp2/3 complex involved in the control of actin polymerization, exon 2 (by homology)	None	None	None	None	None	None	None	None	0.239	-0.044
163.m06237	CNAG_01400	YBR249C	ARO4	None	None	orf19.4060	ca1484	ARO4	None	None	None	3-deoxy-7-phosphoheptulonate synthase	3-deoxy-D-arabino-heptulosonate-7-phosphate (DAHP) synthase, catalyzes the first step in aromatic amino acid biosynthesis and is feedback-inhibited by tyrosine or high concentrations of phenylalanine or tryptophan	None	3-dehydro-deoxyphosphoheptonate aldolase, tyrosine-inhibited (by homology)	None	None	None	None	Cne_OxR-up_2.0	None	Cne_OxSR-up_2.0	None	0.007	-0.548
185.m02435	CNAG_04650	YLR085C	ARP6	SPCC550.12	arp6	orf19.4904	ca0593	ARP6	KOG0680	Z	Actin-related protein - Arp6p	actin-like protein ARP6	Actin-related protein that binds nucleosomes; a component of the SWR1 complex, which exchanges histone variant H2AZ (Htz1p) for chromatin-bound histone H2A	actin-like protein Arp6	actin-related protein (by homology)	None	None	None	None	None	None	None	None	0.072	0.386
177.m03164	CNAG_03248	YOR134W	BAG7	SPBC17F3.01c	rga5	orf19.7115	ca5584	SAC7	KOG2710	TZ	Rho GTPase-activating protein	rho GTPase activator	Rho GTPase activating protein (RhoGAP), stimulates the intrinsic GTPase activity of Rho1p, which plays a role in actin cytoskeleton organization and control of cell wall synthesis; structurally and functionally related to Sac7p	GTPase activating protein Rga5	GAP for RHO1 by homology	None	None	None	None	None	None	None	None	0.422	-0.057
179.m00345	CNAG_02779	YFR047C	BNA6	None	None	orf19.5054	ca1742	IPF12210	None	None	None	nicotinate-nucleotide diphosphorylase	Quinolinate phosphoribosyl transferase, required for the de novo biosynthesis of NAD from tryptophan via kynurenine; expression regulated by Hst1p	None	quinolinate phosphoribosyltransferase (by homology)	None	None	None	None	Cne_OxR-up_2.0	None	Cne_OxSR-up_2.0	None	0.207	-0.212
167.m05833	CNAG_02071	YNL233W	BNI4	None	None	orf19.4457	ca1366	IPF11847	None	None	None	conserved hypothetical protein	Targeting subunit for Glc7p protein phosphatase, localized to the bud neck, required for localization of chitin synthase III to the bud neck via interaction with the chitin synthase III regulatory subunit Skt5p	None	unknown function	None	None	None	None	None	Cne_OxR-dw_2.0	None	Cne_OxSR-dw_2.0	0.504	-0.032
164.m02136	CNAG_06167	YBR290W	BSD2	SPAC328.07c	None	orf19.5869	ca0243	BSD2	KOG4812	R	Golgi-associated protein/Nedd4 WW domain-binding protein	metal homeostatis protein bsd2	Heavy metal ion homeostasis protein, facilitates trafficking of Smf1p and Smf2p metal transporters to the vacuole where they are degraded, controls metal ion transport, prevents metal hyperaccumulation, functions in copper detoxification	heavy metal ion homeostasis protein (predicted)	Metal homeostasis protein (by homology)	None	None	None	None	Cne_OxR-up_2.0	None	Cne_OxSR-up_2.0	None	0.318	0.01
162.m02620	CNAG_07780	YPL069C	BTS1	None	None	orf19.6674	ca4277	BTS1	None	None	None	farnesyltranstransferase	Geranylgeranyl diphosphate synthase, increases the intracellular pool of geranylgeranyl diphosphate, suppressor of bet2 mutation that causes defective geranylgeranylation of small GTP-binding proteins that mediate vesicular traffic	None	Geranylgeranyl diphosphate synthase (by homology)	None	None	None	None	None	Cne_OxR-dw_2.0	None	Cne_OxSR-dw_2.0	0.282	-0.143
177.m03094	CNAG_03325	YOR299W	BUD7	SPBC31F10.16	None	orf19.1112	ca1805	IPF6332	None	None	None	ChAPs family protein	Member of the ChAPs family of proteins (Chs5p-Arf1p-binding proteins: Bch1p, Bch2p, Bud7p, Chs6p), that forms the exomer complex with Chs5p to mediate export of specific cargo proteins, including Chs3p, from the Golgi to the plasma membrane	ChAPs family protein	similar to Saccharomyces cerevisiae Bud7p chitin biosynthesis protein involved in bud site selection (by homology)	None	None	None	None	None	None	None	None	0.274	-0.028
163.m03924	CNAG_00993	YOR125C	CAT5	SPBC337.15c	coq7	orf19.1940	ca3358	IPF19984	KOG4061	R	DMQ mono-oxygenase/Ubiquinone biosynthesis protein COQ7/CLK-1/CAT5	coenzyme q10 biosynthesis protein	Protein required for ubiquinone (Coenzyme Q) biosynthesis; localizes to the matrix face of the mitochondrial inner membrane in a large complex with ubiquinone biosynthetic enzymes; required for gluconeogenic gene activation	ubiquinone biosynthesis protein Coq7	similar to Saccharomyces cerevisiae Cat5p involved in coenzyme Q (ubiquinone) biosynthesis (by homology)	None	None	None	None	None	None	None	None	0.571	0.085
177.m03216	CNAG_03190	YAL021C	CCR4	SPCC31H12.08c	ccr4	orf19.5101	ca2222	CCR4	KOG0620	K	Glucose-repressible alcohol dehydrogenase transcriptional effector CCR4 and related proteins	glucose-repressible alcohol dehydrogenase transcriptional effector	Component of the CCR4-NOT transcriptional complex, which is involved in regulation of gene expression; component of the major cytoplasmic deadenylase, which is involved in mRNA poly(A) tail shortening	CCR4-Not complex subunit Ccr4 (predicted)	glucose-repressible alcohol dehydrogenase transcriptional effector	None	None	None	None	None	None	None	None	0.346	-0.093
183.m01747	CNAG_07942	YLR310C	CDC25	None	None	None	None	None	KOG3417	T	Ras1 guanine nucleotide exchange factor	cell division control protein 25	Membrane bound guanine nucleotide exchange factor (GEF or GDP-release factor); indirectly regulates adenylate cyclase through activation of Ras1p and Ras2p by stimulating the exchange of GDP for GTP; required for progression through G1	None	None	None	None	None	None	None	None	None	None	0.12	0.408
181.m08064	CNAG_00320	YBL084C	CDC27	SPAC17C9.01c	nuc2	orf19.3231	ca5429	CDC27	KOG1126	D	DNA-binding cell division cycle control protein	ubiquitin-protein ligase	Subunit of the Anaphase-Promoting Complex/Cyclosome (APC/C), which is a ubiquitin-protein ligase required for degradation of anaphase inhibitors, including mitotic cyclins, during the metaphase/anaphase transition	anaphase-promoting complex subunit Apc3	subunit of anaphase-promoting complex (by homology)	None	None	None	None	None	Cne_OxR-dw_2.0	None	Cne_OxSR-dw_2.0	-0.112	0.522
179.m00160	CNAG_01664	YBR160W	CDC28	SPBC11B10.09	cdc2	orf19.3856	ca3095	CDC28	KOG0594	R	Protein kinase PCTAIRE and related kinases	CMGC/CDK/CDC2 protein kinase	Catalytic subunit of the main cell cycle cyclin-dependent kinase (CDK); alternately associates with G1 cyclins (CLNs) and G2/M cyclins (CLBs) which direct the CDK to specific substrates	cyclin-dependent protein kinase Cdc2	CELL DIVISION CONTROL PROTEIN 28 -protein kinase	None	None	None	None	None	Cne_OxR-dw_2.0	None	Cne_OxSR-dw_2.0	0.293	-0.1
180.m00143	CNAG_06696	YGL190C	CDC55	SPAC227.07c	pab1	orf19.1468	ca4535	CDC55	KOG1354	T	Serine/threonine protein phosphatase 2A, regulatory subunit	Ppp2r2b protein	Non-essential regulatory subunit B of protein phosphatase 2A, which has multiple roles in mitosis and protein biosynthesis; involved in regulation of mitotic exit; found in the nucleus of most cells, also at the bud neck and at the bud tip	protein phosphatase regulatory subunit Pab1	B subunit of protein phosphatase 2A (by homology)	None	None	None	None	None	None	None	None	0.189	-0.137
162.m02661	CNAG_04450	YER164W	CHD1	SPAC3G6.01	hrp3	orf19.3035	ca5064	CHD1	KOG0384	K	Chromodomain-helicase DNA-binding protein	transcription regulator	Nucleosome remodeling factor that functions in regulation of transcription elongation; contains a chromo domain, a helicase domain and a DNA-binding domain; component of both the SAGA and SLIK complexes	ATP-dependent DNA helicase Hrp3	transcriptional regulator (by homology)	None	None	None	None	None	None	None	None	0.338	-0.013
167.m03566	CNAG_02111	YOR250C	CLP1	SPAC22H10.05c	None	orf19.6931	ca4703	CLP1	KOG2749	A	mRNA cleavage and polyadenylation factor IA/II complex, subunit CLP1	conserved hypothetical protein	Subunit of cleavage factor I (CFI), involved in both the endonucleolyitc cleavage and polyadenylation steps of mRNA 3'-end maturation	mRNA cleavage and polyadenylation specificity factor complex subunit (predicted)	probable cleaveage/polyadenylation factor	None	None	None	None	None	None	None	None	0.465	-0.034
179.m00540	CNAG_01557	YBR109C	CMD1	SPAC3A12.14	cam1	orf19.4413	None	None	KOG0027	T	Calmodulin and related proteins (EF-Hand superfamily)	calmodulin 1b	Calmodulin; Ca++ binding protein that regulates Ca++ independent processes (mitosis, bud growth, actin organization, endocytosis, etc.) and Ca++ dependent processes (stress-activated pathways), targets include Nuf1p, Myo2p and calcineurin	calmodulin Cam1	None	None	None	None	None	None	None	None	None	0.134	-0.316
177.m02900	CNAG_03554	YDL145C	COP1	SPBPJ4664.04	None	orf19.1672	ca0606	COP1	KOG0292	U	Vesicle coat complex COPI, alpha subunit	coatomer alpha subunit	Alpha subunit of COPI vesicle coatomer complex, which surrounds transport vesicles in the early secretory pathway	coatomer alpha subunit (predicted)	coatomer complex alpha chain of secretory pathway vesicles (by homology)	None	None	None	None	None	Cne_OxR-dw_2.0	None	Cne_OxSR-dw_2.0	0.218	-0.15
176.m02235	CNAG_02609	YOL096C	COQ3	SPCC162.05	coq3	orf19.3400	ca2432	COQ3	KOG1270	H	Methyltransferases	hexaprenyldihydroxybenzoate methyltransferase	O-methyltransferase, catalyzes two different O-methylation steps in ubiquinone (Coenzyme Q) biosynthesis; component of a mitochondrial ubiquinone-synthesizing complex	hexaprenyldihydroxybenzoate methyltransferase	3,4-dihydroxy-5-hexaprenylbenzoatemethyltransferase	None	None	None	None	None	None	None	None	0.407	0.054
176.m02434	CNAG_01962	YDR204W	COQ4	SPAC1687.12c	coq4	orf19.3008	ca3118	COQ4	KOG3244	H	Protein involved in ubiquinone biosynthesis	COQ4	Protein with a role in ubiquinone (Coenzyme Q) biosynthesis, possibly functioning in stabilization of Coq7p; located on the matrix face of the mitochondrial inner membrane; component of a mitochondrial ubiquinone-synthesizing complex	ubiquinone biosynthesis protein Coq4 (predicted)	ubiquinone biosynthesis	None	None	None	None	None	None	None	None	0.316	-0.06
176.m02567	CNAG_01991	YNL052W	COX5A	SPCC338.10c	cox5	orf19.4759	ca2630	COX5A	KOG4075	C	Cytochrome c oxidase, subunit IV/COX5b	cytochrome c oxidase subunit V	Subunit Va of cytochrome c oxidase, which is the terminal member of the mitochondrial inner membrane electron transport chain; predominantly expressed during aerobic growth while its isoform Vb (Cox5Bp) is expressed during anaerobic growth	cytochrome c oxidase subunit V	cytochrome-c oxidase chain V.A precursor (by homology)	None	None	None	None	None	None	None	None	-0.36	1.238
163.m03930	CNAG_00979	YLR411W	CTR3	SPCC1393.10	ctr4	None	None	None	KOG3386	P	Copper transporter	copper uptake transporter	High-affinity copper transporter of the plasma membrane, acts as a trimer; gene is disrupted by a Ty2 transposon insertion in many laboratory strains of S. cerevisiae	copper transporter complex subunit Ctr4	None	None	Cne_OsR-dw_2.0	None	Cne_FxR-dw_2.0	None	Cne_OxR-dw_2.0	None	Cne_CSR-dw_2.0	1.592	-1.015
162.m02767	CNAG_04362	YOR046C	DBP5	SPBC12C2.06	None	orf19.1661	ca3464	DBP5	KOG0332	A	ATP-dependent RNA helicase	ATP-dependent RNA helicase DBP5	Cytoplasmic ATP-dependent RNA helicase of the DEAD-box family involved in mRNA export from the nucleus; involved in translation termination	ATP-dependent RNA helicase Dbp5	RNA helicase (by homology)	None	None	None	None	None	None	None	None	0.245	-0.113
162.m03011	CNAG_04362	YOR046C	DBP5	SPBC12C2.06	None	orf19.1661	ca3464	DBP5	KOG0332	A	ATP-dependent RNA helicase	ATP-dependent RNA helicase DBP5	Cytoplasmic ATP-dependent RNA helicase of the DEAD-box family involved in mRNA export from the nucleus; involved in translation termination	ATP-dependent RNA helicase Dbp5	RNA helicase (by homology)	None	None	None	None	None	None	None	None	0.332	-0.079
180.m00027	CNAG_05921	YOR245C	DGA1	SPCC1235.15	dga1	orf19.6941	ca4709	IPF5895	KOG0831	I	Acyl-CoA:diacylglycerol acyltransferase (DGAT)	diacylglycerol O-acyltransferase	Diacylglycerol acyltransferase, catalyzes the terminal step of triacylglycerol (TAG) formation, acylates diacylglycerol using acyl-CoA as an acyl donor, localized to lipid particles	diacylglycerol O-acyltransferase	unknown function	None	None	None	None	None	None	None	None	0.399	0.093
162.m02715	CNAG_04387	YPR082C	DIB1	SPCC16A11.05c	dim1	orf19.1975	ca0468	DIB1	KOG3414	AD	Component of the U4/U6.U5 snRNP/mitosis protein DIM1	pre-mRNA splicing factor	17-kDa component of the U4/U6aU5 tri-snRNP, plays an essential role in pre-mRNA splicing, orthologue of hDIM1, the human U5-specific 15-kDa protein	U4/U6 x U5 tri-snRNP complex subunit Dim1	Component of the U4/U6.U5 snRNP (by homology)	None	Cne_OsR-dw_2.0	None	None	None	None	None	Cne_OsSR-dw_2.0	0.58	-0.086
179.m00627	CNAG_01485	YDL174C	DLD1	None	None	orf19.6043	ca4905	DLD1	KOG1231	C	Proteins containing the FAD binding domain	D-lactate dehydrogenase cytochrome oxidoreductase protein	D-lactate dehydrogenase, oxidizes D-lactate to pyruvate, transcription is heme-dependent, repressed by glucose, and derepressed in ethanol or lactate; located in the mitochondrial inner membrane	None	D-lactate ferricytochrome C oxidoreductase (by homology)	None	None	None	None	None	None	None	None	0.241	-0.078
180.m00171	CNAG_06656	YLR172C	DPH5	SPCC576.14	None	orf19.6676	ca4279	DPH51	KOG3123	J	Diphthine synthase	diphthine synthase	Methyltransferase required for synthesis of diphthamide, which is a modified histidine residue of translation elongation factor 2 (Eft1p or Eft2p); not essential for viability; GFP-Dph5p fusion protein localizes to the cytoplasm	diphthine synthase (predicted)	Diphthamide methyltransferase (by homology)	None	None	None	None	None	None	None	None	0.347	-0.107
163.m06403	CNAG_07400	YLL018C	DPS1	SPCC1223.07c	None	orf19.2407	ca3052	DPS1	KOG0556	J	Aspartyl-tRNA synthetase	aspartate-tRNA ligase	Cytoplasmic aspartyl-tRNA synthetase, homodimeric enzyme that catalyzes the specific aspartylation of tRNA(Asp); class II aminoacyl tRNA synthetase; binding to its own mRNA may confer autoregulation	aspartate-tRNA ligase (predicted)	aspartyl-tRNA synthetase (by homology)	None	None	None	None	None	Cne_OxR-dw_2.0	None	Cne_OxSR-dw_2.0	0.224	-0.062
180.m00451	CNAG_06603	YBR281C	DUG2	None	None	orf19.2455	None	None	KOG2276	E	Metalloexopeptidases	WD repeat-containing protein	Probable di- and tri-peptidase; forms a complex with Dug1p and Dug3p to degrade glutathione (GSH) and other peptides containing a gamma-glu-X bond in an alternative pathway to GSH degradation by gamma-glutamyl transpeptidase (Ecm38p)	None	None	None	None	None	None	None	None	None	None	0.185	-0.32
179.m00302	CNAG_02714	YAL003W	EFB1	SPCC1450.04	tef5	orf19.3838	ca4862	EFB1	KOG1668	K	Elongation factor 1 beta/delta chain	elongation factor 1-beta	Translation elongation factor 1 beta; stimulates nucleotide exchange to regenerate EF-1 alpha-GTP for the next elongation cycle; part of the EF-1 complex, which facilitates binding of aminoacyl-tRNA to the ribosomal A site	translation elongation factor EF-1 beta subunit (eEF1B)	translation elongation factor eEF1beta	None	None	None	None	None	Cne_OxR-dw_2.0	None	Cne_OxSR-dw_2.0	0.237	-0.1
181.m08053	CNAG_00311	YDR036C	EHD3	SPBC2D10.09	None	orf19.3029	ca5060	IPF3690	None	None	None	3-hydroxyisobutyryl-CoA hydrolase	3-hydroxyisobutyryl-CoA hydrolase, member of a family of enoyl-CoA hydratase/isomerases; non-tagged protein is detected in highly purified mitochondria in high-throughput studies; phosphorylated; mutation affects fluid-phase endocytosis	3-hydroxyisobutyryl-CoA hydrolase	unknown function	None	None	None	Cne_FxR-dw_2.0	None	Cne_OxR-dw_2.0	None	None	0.401	-0.071
186.m03832	CNAG_03905	YKL160W	ELF1	SPAC1B3.02c	None	orf19.6623	ca4070	IPF2562	KOG3214	S	Uncharacterized Zn ribbon-containing protein	conserved hypothetical protein	Transcription elongation factor that contains a conserved zinc finger domain; implicated in the maintenance of proper chromatin structure in actively transcribed regions; deletion inhibits Brome mosaic virus (BMV) gene expression	transcription elongation factor, Elf1 family	unknown function	None	None	None	None	None	None	None	None	0.277	-0.092
167.m03590	CNAG_02084	YJL167W	ERG20	SPAC6F12.13c	fps1	orf19.4491	ca1442	ERG20	KOG0711	H	Polyprenyl synthetase	farnesyl pyrophosphate synthetase	Farnesyl pyrophosphate synthetase, has both dimethylallyltranstransferase and geranyltranstransferase activities; catalyzes the formation of C15 farnesyl pyrophosphate units for isoprenoid and sterol biosynthesis	geranyltranstransferase Fps1	farnesyl-pyrophosphate synthetase	None	None	None	None	None	None	None	None	0.396	-0.351
163.m06278	CNAG_07437	YLR100W	ERG27	SPBC1709.07	erg27	orf19.3240	ca5437	ERG27	KOG1478	I	3-keto sterol reductase	3-keto sterol reductase	3-keto sterol reductase, catalyzes the last of three steps required to remove two C-4 methyl groups from an intermediate in ergosterol biosynthesis; mutants are sterol auxotrophs	3-keto sterol reductase (predicted)	3-keto sterol reductase (by homology)	None	None	None	None	None	Cne_OxR-dw_2.0	None	Cne_OxSR-dw_2.0	0.31	-0.021
162.m02919	CNAG_04120	YMR277W	FCP1	SPAC19B12.05c	fcp1	orf19.6742	ca5952	IPF3503	KOG0323	K	TFIIF-interacting CTD phosphatases, including NLI-interacting factor	conserved hypothetical protein	Carboxy-terminal domain (CTD) phosphatase, essential for dephosphorylation of the repeated C-terminal domain of the RNA polymerase II large subunit (Rpo21p)	CTD phosphatase Fcp1	similar to Saccharomyces cerevisiae Fcp1p TFIIF interacting component of CTD phosphatase (by homology)	None	None	None	None	None	None	None	None	0.353	-0.068
179.m00155	CNAG_01657	YPL262W	FUM1	SPCC18.18c	fum1	orf19.543	ca4255	FUM11	KOG1317	C	Fumarase	fumarate hydratase	Fumarase, converts fumaric acid to L-malic acid in the TCA cycle; cytosolic and mitochondrial localization determined by the N-terminal mitochondrial targeting sequence and protein conformation; phosphorylated in mitochondria	fumarate hydratase	fumarate hydratase	None	None	None	Cne_FxR-dw_2.0	Cne_OxR-up_2.0	None	Cne_OxSR-up_2.0	Cne_FxSR-dw_2.0	0.233	-0.067
162.m02911	CNAG_04259	YHR089C	GAR1	SPBC20F10.01	gar1	orf19.1164	ca1789	GAR1	KOG3262	J	H/ACA small nucleolar RNP component GAR1	small nucleolar RNP protein	Protein component of the H/ACA snoRNP pseudouridylase complex, involved in the modification and cleavage of the 18S pre-rRNA	snoRNP pseudouridylase complex protein Gar1	Nucleolar rRNA processing protein (by homology)	None	None	None	None	None	Cne_OxR-dw_2.0	None	Cne_OxSR-dw_2.0	0.385	-0.132
163.m03861	CNAG_01018	YER025W	GCD11	SPBC17G9.09	tif213	orf19.4223	ca1322	GCD11	KOG0466	J	Translation initiation factor 2, gamma subunit (eIF-2gamma; GTPase)	eukaryotic translation initiation factor 2 gamma	Gamma subunit of the translation initiation factor eIF2, involved in the identification of the start codon; binds GTP when forming the ternary complex with GTP and tRNAi-Met	translation initiation factor eIF2 gamma subunit	Translation initiation factor eIF2 (by homology)	None	None	None	None	None	None	None	None	0.268	-0.19
181.m08083	CNAG_00375	YGR252W	GCN5	SPAC1952.05	gcn5	orf19.705	ca1705	GCN5	KOG1472	BK	Histone acetyltransferase SAGA/ADA, catalytic subunit PCAF/GCN5 and related proteins	transcriptional activator gcn5	Histone acetyltransferase, acetylates N-terminal lysines on histones H2B and H3; catalytic subunit of the ADA and SAGA histone acetyltransferase complexes; founding member of the Gcn5p-related N-acetyltransferase superfamily	histone acetyltransferase Gcn5	Histone acetyltransferase (by homology)	None	None	None	None	None	None	None	None	0.01	0.445
163.m03931	CNAG_00977	YHR108W	GGA2	SPBC25H2.16c	None	orf19.3006	ca3121	GGA1	KOG1087	U	Cytosolic sorting protein GGA2/TOM1	VHS domain-containing protein	Golgi-localized protein with homology to gamma-adaptin, interacts with and regulates Arf1p and Arf2p in a GTP-dependent manner in order to facilitate traffic through the late Golgi	adaptin (predicted)	Arf-binding protein	None	None	None	None	None	None	None	None	0.247	-0.212
162.m02627	CNAG_04505	YER020W	GPA2	SPAC23H3.13c	gpa2	orf19.1621	ca4012	GPA2	KOG0082	DT	G-protein alpha subunit (small G protein superfamily)	guanine nucleotide-binding protein subunit alpha	Nucleotide binding alpha subunit of the heterotrimeric G protein that interacts with the receptor Gpr1p, has signaling role in response to nutrients; green fluorescent protein (GFP)-fusion protein localizes to the cell periphery	heterotrimeric G protein alpha-2 subunit Gpa2	nucleotide-binding regulatory protein GPA2	None	None	None	None	None	None	None	None	0.3	-0.106
181.m08523	CNAG_00804	YML121W	GTR1	SPBC337.13c	gtr1	orf19.3617	ca1677	GTR1	KOG3886	T	GTP-binding protein	Gtr1/RagA G protein Gtr1	Cytoplasmic GTP binding protein and negative regulator of the Ran/Tc4 GTPase cycle; component of GSE complex, which is required for sorting of Gap1p; involved in phosphate transport and telomeric silencing; similar to human RagA and RagB	Gtr1/RagA G protein Gtr1	GTP-binding protein by homology	None	None	None	None	None	Cne_OxR-dw_2.0	None	Cne_OxSR-dw_2.0	0.363	0.057
176.m02232	CNAG_02605	YOR070C	GYP1	SPBC530.01	gyp1	orf19.3811	ca4843	GYP1	KOG1092	U	Ypt/Rab-specific GTPase-activating protein GYP1	tbc1 domain family protein	Cis-golgi GTPase-activating protein (GAP) for the Rab family members Ypt1p (in vivo) and for Ypt1p, Sec4p, Ypt7p, and Ypt51p (in vitro); involved in vesicle docking and fusion	GTPase activating protein Gyp1 (predicted)	GTPase activating protein (by homology)	None	None	None	None	None	None	None	None	0.493	0.019
164.m02043	CNAG_06010	YMR110C	HFD1	None	None	orf19.6066	ca4927	IPF1401	KOG2456	C	Aldehyde dehydrogenase	fatty aldehyde dehydrogenase	Putative fatty aldehyde dehydrogenase, located in the mitochondrial outer membrane and also in lipid particles; has similarity to human fatty aldehyde dehydrogenase (FALDH) which is implicated in Sjogren-Larsson syndrome	None	similarity to aldehyde dehydrogenase (by homology)	None	None	None	None	Cne_OxR-up_2.0	None	Cne_OxSR-up_2.0	None	0.271	-0.024
179.m00147	CNAG_07807	YNL030W	HHF2	SPBC1105.12	hhf3	orf19.1854	ca3372	HHF22	KOG3467	B	Histone H4	histone H4	One of two identical histone H4 proteins (see also HHF1); core histone required for chromatin assembly and chromosome function; contributes to telomeric silencing; N-terminal domain involved in maintaining genomic integrity	histone H4 h4.3	histone H4 (by homology)	None	None	None	Cne_FxR-dw_2.0	None	None	None	Cne_FxSR-dw_2.0	-0.029	-0.528
162.m02834	CNAG_04158	YBL008W	HIR1	SPBC31F10.13c	hip1	orf19.2099	ca2745	HIR1.3f	KOG0973	DK	Histone transcription regulator HIRA, WD repeat superfamily	transcription corepressor	Subunit of the HIR complex, a nucleosome assembly complex involved in regulation of histone gene transcription; contributes to nucleosome formation, heterochromatic gene silencing, and formation of functional kinetochores	hira protein Hip1	Histone transcription regulator (by homology)	None	None	None	None	None	None	None	None	0.487	0.028
162.m02761	CNAG_04347	YER052C	HOM3	SPBC19F5.04	None	orf19.1235	ca2977	HOM3	KOG0456	E	Aspartate kinase	aspartate kinase	Aspartate kinase (L-aspartate 4-P-transferase); cytoplasmic enzyme that catalyzes the first step in the common pathway for methionine and threonine biosynthesis; expression regulated by Gcn4p and the general control of amino acid synthesis	aspartate kinase (predicted)	Aspartokinase (by homology)	None	None	None	None	Cne_OxR-up_2.0	None	Cne_OxSR-up_2.0	None	0.257	-0.007
177.m03264	CNAG_03143	YFL014W	HSP12	None	None	orf19.3160	ca0627	HSP12	None	None	None	conserved hypothetical protein	Plasma membrane localized protein that protects membranes from desiccation; induced by heat shock, oxidative stress, osmostress, stationary phase entry, glucose depletion, oleate and alcohol; regulated by the HOG and Ras-Pka pathways	None	Heat shock protein (by homology)	None	None	None	None	None	None	None	None	0.481	0.012
179.m00179	CNAG_01686	YDR533C	HSP31	SPBC947.09	None	orf19.251	ca0828	IPF17186	None	None	None	ThiJ/PfpI	Possible chaperone and cysteine protease with similarity to E. coli Hsp31; member of the DJ-1/ThiJ/PfpI superfamily, which includes human DJ-1 involved in Parkinson's disease; exists as a dimer and contains a putative metal-binding site	ThiJ domain protein	unknown function	None	None	None	None	None	Cne_OxR-dw_2.0	None	Cne_OxSR-dw_2.0	0.329	-0.048
180.m00114	CNAG_05725	YLR355C	ILV5	SPBC56F2.12	ilv5	orf19.88	ca1983	ILV5	None	None	None	ketol-acid reductoisomerase	Acetohydroxyacid reductoisomerase, mitochondrial protein involved in branched-chain amino acid biosynthesis, also required for maintenance of wild-type mitochondrial DNA and found in mitochondrial nucleoids	acetohydroxyacid reductoisomerase	ketol-acid reducto-isomerase (by homology)	None	None	None	None	Cne_OxR-up_2.0	None	Cne_OxSR-up_2.0	None	0.122	-0.215
179.m00278	CNAG_01823	YDR287W	INM2	None	None	None	None	None	KOG2951	G	Inositol monophosphatase	myo-inositol monophosphatase	Inositol monophosphatase, involved in biosynthesis of inositol; enzymatic activity requires magnesium ions and is inhibited by lithium and sodium ions; inm1 inm2 double mutant lacks inositol auxotrophy	None	None	None	None	None	None	None	None	None	None	0.312	-0.054
179.m00555	CNAG_01539	YJL153C	INO1	None	None	orf19.7585	ca5986	INO1	KOG0693	I	Myo-inositol-1-phosphate synthase	inositol-3-phosphate synthase	Inositol 1-phosphate synthase, involved in synthesis of inositol phosphates and inositol-containing phospholipids; transcription is coregulated with other phospholipid biosynthetic genes by Ino2p and Ino4p, which bind the UASINO DNA element	None	myo-inositol-1-phosphate synthase	None	None	None	None	None	Cne_OxR-dw_2.0	None	Cne_OxSR-dw_2.0	0.074	-0.249
185.m02483	CNAG_04704	YKL217W	JEN1	None	None	orf19.5307	ca5478	JEN2	None	None	None	carboxylic acid transport protein	Lactate transporter, required for uptake of lactate and pyruvate; phosphorylated; expression is derepressed by transcriptional activator Cat8p during respiratory growth, and repressed in the presence of glucose, fructose, and mannose	None	carboxylic acid transporter protein (by homology)	None	None	None	None	None	None	None	None	0.265	-0.115
179.m00436	CNAG_02897	YDR017C	KCS1	SPCC970.08	None	orf19.1007	ca0133	IPF3746	KOG1620	KIT	Inositol polyphosphate multikinase, component of the ARGR transcription regulatory complex	inositol hexaphosphate kinase 1	Inositol hexakisphosphate (IP6) and inositol heptakisphosphate (IP7) kinase; generation of high energy inositol pyrophosphates by Kcs1p is required for many processes such as vacuolar biogenesis, stress response and telomere maintenance	inositol polyphosphate kinase (predicted)	unknown function	None	None	None	None	None	None	None	None	0.622	0.211
163.m06415	CNAG_06835	YPR159W	KRE6	SPAC23H3.11c	None	None	None	None	None	None	None	glucosidase	Protein required for beta-1,6 glucan biosynthesis; putative beta-glucan synthase; appears functionally redundant with Skn1p	glucosidase (predicted)	None	None	Cne_OsR-dw_2.0	None	None	None	None	None	Cne_OsSR-dw_2.0	0.442	0.059
180.m00113	CNAG_05726	YKL207W	LRC3	SPBC1711.03	None	orf19.6462	ca4129	IPF6878	KOG3188	S	Uncharacterized conserved protein	DUF850 domain-containing protein	Putative protein of unknown function; non-essential gene; null mutant displays decreased frequency of mitochondrial genome loss (petite formation) and severe growth defect in minimal glycerol media	conserved eukaryotic protein	unknown function	None	None	None	None	None	None	None	None	0.325	-0.04
181.m08500	CNAG_00781	YLR438C-A	LSM3	SPBC9B6.05c	lsm3	orf19.6135.1	ca3420	SMX4	KOG3460	A	Small nuclear ribonucleoprotein (snRNP) LSM3	conserved hypothetical protein	Lsm (Like Sm) protein; part of heteroheptameric complexes (Lsm2p-7p and either Lsm1p or 8p): cytoplasmic Lsm1p complex involved in mRNA decay; nuclear Lsm8p complex part of U6 snRNP and possibly involved in processing tRNA, snoRNA, and rRNA	U6 snRNP-associated protein Lsm3	U6 snRNA-associated Sm-like protein (by homology)	None	None	None	None	None	None	None	None	0.315	-0.091
186.m03495	CNAG_07464	YDL056W	MBP1	SPAC22F3.09c	res2	orf19.4545	ca4203	SWI4.3f	None	None	None	transcription factor	Transcription factor involved in regulation of cell cycle progression from G1 to S phase, forms a complex with Swi6p that binds to MluI cell cycle box regulatory element in promoters of DNA synthesis genes	MBF transcription factor complex subunit Res2	transcription factor (by homology)	None	None	None	None	None	Cne_OxR-dw_2.0	None	Cne_OxSR-dw_2.0	0.402	0.076
184.m04442	CNAG_05462	YKL150W	MCR1	None	None	orf19.3507	ca2457	MCR1	KOG0534	HC	NADH-cytochrome b-5 reductase	cytochrome-b5 reductase	Mitochondrial NADH-cytochrome b5 reductase, involved in ergosterol biosynthesis	None	NADH-cytochrome-b5 reductase (by homology)	None	None	None	None	None	None	None	None	0.69	-0.02
176.m02382	CNAG_01906	YOL009C	MDM12	SPBC28F2.06c	mdm12	orf19.6900	ca4582	MDM12	None	None	None	mitochondrial inheritance component mdm12	Mitochondrial outer membrane protein, required for transmission of mitochondria to daughter cells; component of the Mdm10-Mdm12-Mmm1 complex involved in import and assembly of outer membrane beta-barrel proteins	Mdm10/Mdm12/Mmm1 complex subunit Mdm12	Involved in mitochondrial inheritance (by homology)	None	None	None	None	None	None	None	None	0.342	-0.233
181.m08090	CNAG_00369	YHR058C	MED6	SPAC1002.15c	pmc5	orf19.7420	ca5716	MED6	KOG3169	K	RNA polymerase II transcriptional regulation mediator	conserved hypothetical protein	Subunit of the RNA polymerase II mediator complex; associates with core polymerase subunits to form the RNA polymerase II holoenzyme; essential for transcriptional regulation	mediator complex subunit Pmc5	RNA polymerase II transcriptional regulation mediator (by homology)	None	None	None	None	None	None	None	None	0.09	0.622
181.m08449	CNAG_00727	YPL224C	MMT2	SPCC1020.03	None	orf19.52	ca2599	IPF11176	KOG1485	P	Mitochondrial Fe2+ transporter MMT1 and related transporters (cation diffusion facilitator superfamily)	mitochondrial protein with role in iron accumulation	Putative metal transporter involved in mitochondrial iron accumulation; closely related to Mmt1p	mitochondrial iron ion transporter	similar to Saccharomyces cerevisiae Mmt2p mitochondrial iron transporter (by homology)	None	Cne_OsR-dw_2.0	None	Cne_FxR-dw_2.0	None	None	None	None	0.439	-0.03
179.m00275	CNAG_01819	YDR116C	MRPL1	SPAC1610.02c	None	orf19.5698	ca2613	IPF5446	None	None	None	ribosomal protein L1	Mitochondrial ribosomal protein of the large subunit	mitochondrial ribosomal protein subunit L1	putative ribosomal protein (by homology)	None	None	None	None	None	Cne_OxR-dw_2.0	None	Cne_OxSR-dw_2.0	0.454	0.157
179.m00392	CNAG_02842	YNL252C	MRPL17	SPCC126.05c	mrpl17	orf19.585	ca3432	MRPL17	KOG4548	J	Mitochondrial ribosomal protein L17	conserved hypothetical protein	Mitochondrial ribosomal protein of the large subunit	mitochondrial ribosomal protein subunit L17	ribosomal protein of the large subunit (YmL30), mitochondrial (by homology)	None	None	None	None	None	Cne_OxR-dw_2.0	None	Cne_OxSR-dw_2.0	0.34	-0.036
179.m00174	CNAG_01679	YDR337W	MRPS28	SPBC11B10.04c	mrps28	orf19.2520	ca0462	MRPS28	KOG2815	J	Mitochondrial/choloroplast ribosomal protein S15	conserved hypothetical protein	Mitochondrial ribosomal protein of the small subunit	mitochondrial ribosomal protein subunit S28	ribosomal protein (by homology)	None	None	None	None	None	Cne_OxR-dw_2.0	None	Cne_OxSR-dw_2.0	0.191	-0.232
177.m03402	CNAG_03353	YBR146W	MRPS9	SPAC29A4.03c	None	orf19.5230	ca1109	MRPS9	KOG1697	J	Mitochondrial/chloroplast ribosomal protein S9	conserved hypothetical protein	Mitochondrial ribosomal protein of the small subunit	mitochondrial ribosomal protein subunit S9	ribosomal protein S9 small subunit precursor	None	None	None	None	None	Cne_OxR-dw_2.0	None	Cne_OxSR-dw_2.0	0.554	0.128
176.m02393	CNAG_01916	YDR097C	MSH6	SPCC285.16c	msh6	orf19.4945	ca3705	MSH6	KOG0217	L	Mismatch repair ATPase MSH6 (MutS family)	DNA mismatch repair protein msh6	Protein required for mismatch repair in mitosis and meiosis, forms a complex with Msh2p to repair both single-base & insertion-deletion mispairs; potentially phosphorylated by Cdc28p	MutS protein homolog	DNA mismatch repair protein by homology	None	Cne_OsR-dw_2.0	None	None	None	None	None	Cne_OsSR-dw_2.0	0.232	-0.095
176.m02273	CNAG_07537	YMR097C	MTG1	SPBC25B2.04c	None	orf19.2384	ca2101	IPF9364	KOG2485	R	Conserved ATP/GTP binding protein	mitochondrial GTPase 1	Peripheral GTPase of the mitochondrial inner membrane, essential for respiratory competence, likely functions in assembly of the large ribosomal subunit, has homologs in plants and animals	mitochondrial ribosome assembly protein	unknown function	None	None	None	None	None	None	None	None	0.428	-0.104
162.m02898	CNAG_04202	YNL240C	NAR1	SPCC1450.10c	None	orf19.4757	ca2632	NAR1	KOG2439	Y	Nuclear architecture related protein	iron hydrogenase	Nuclear architecture related protein; component of the cytosolic iron-sulfur (FeS) protein assembly machinery, required for maturation of cytosolic and nuclear FeS proteins; homologous to human Narf	iron hydrogenase (predicted)	Yeast nuclear architecture related protein (by homology)	None	Cne_OsR-dw_2.0	None	Cne_FxR-dw_2.0	None	None	None	None	0.482	0.094
163.m03775	CNAG_00874	YBL024W	NCL1	SPAC23C4.17	None	orf19.518	ca4235	NCL1	KOG2198	J	tRNA cytosine-5-methylases and related enzymes of the NOL1/NOP2/sun superfamily	tRNA (cytosine-5-)-methyltransferase	S-adenosyl-L-methionine-dependent tRNA: m5C-methyltransferase, methylates cytosine to m5C at several positions in tRNAs and intron-containing pre-tRNAs; similar to Nop2p and human proliferation associated nucleolar protein p120	tRNA (cytosine-5-)-methyltransferase (predicted)	Probable proliferating-cell nucleolar antigen (by homology)	None	None	None	None	None	None	None	None	0.347	-0.124
162.m02222	CNAG_04193	None	None	None	None	None	None	None	None	None	None	conserved hypothetical protein	None	None	None	None	None	None	None	None	None	None	None	0.252	-0.272
162.m02324	CNAG_04311	None	None	SPBC1604.18c	None	None	None	None	KOG2911	S	Uncharacterized conserved protein	conserved hypothetical protein	None	vacuolar sorting protein (predicted)	None	None	None	None	None	Cne_OxR-up_2.0	None	Cne_OxSR-up_2.0	None	0.44	0.071
162.m02345	CNAG_04330	None	None	None	None	None	None	None	KOG0781	U	Signal recognition particle receptor, alpha subunit	conserved hypothetical protein	None	None	None	None	None	None	None	None	None	None	None	-0.391	0.814
162.m02596	None	None	None	None	None	None	None	None	None	None	None	None	None	None	None	None	None	None	None	None	None	None	None	0.423	-0.102
162.m02625	CNAG_04511	None	None	None	None	None	None	None	None	None	None	conserved hypothetical protein	None	None	None	None	None	None	None	None	None	None	None	0.239	-0.197
162.m02712	CNAG_04393	None	None	None	None	None	None	None	KOG0952	A	DNA/RNA helicase MER3/SLH1, DEAD-box superfamily	RNA helicase	None	None	None	None	None	None	None	None	None	None	None	0.438	-0.017
162.m02733	CNAG_04396	YCL012C	None	SPAC1687.07	None	orf19.7078	ca5620	IPF511	None	None	None	Aycl012	None	conserved fungal protein	unknown function	None	None	None	None	Cne_OxR-up_2.0	None	Cne_OxSR-up_2.0	None	0.404	0.018
162.m02759	CNAG_04344	None	None	None	None	None	None	None	None	None	None	mandelate racemase/muconate lactonizing enzyme	None	None	None	None	None	None	None	None	None	None	None	0.336	0.002
162.m02770	CNAG_04368	None	None	None	None	None	None	None	KOG2950	R	Uncharacterized protein involved in protein-protein interaction, contains polyproline-binding GYF domain	conserved hypothetical protein	None	None	None	None	None	None	None	None	None	None	None	0.29	-0.119
162.m02779	CNAG_04320	None	None	None	None	None	None	None	KOG2571	M	Chitin synthase/hyaluronan synthase (glycosyltransferases)	polysaccharide synthase Cps1p	None	None	None	None	None	None	None	None	None	None	None	0.396	0.052
162.m02829	CNAG_04281	None	None	None	None	None	None	None	None	None	None	conserved hypothetical protein	None	None	None	None	None	None	None	None	None	None	None	0.347	-0.061
162.m02833	CNAG_04290	None	None	None	None	None	None	None	None	None	None	conserved hypothetical protein	None	None	None	None	None	None	None	None	None	None	None	0.152	-0.284
162.m02939	CNAG_04272	None	None	SPACUNK12.02c	cmk1	None	None	None	KOG0032	T	Ca2+/calmodulin-dependent protein kinase, EF-Hand protein superfamily	CAMK/CAMK1 protein kinase	None	calcium/calmodulin-dependent protein kinase Cmk1	None	None	None	None	None	Cne_OxR-up_2.0	None	Cne_OxSR-up_2.0	None	0.213	-0.114
162.m02953	CNAG_04236	None	None	None	None	None	None	None	KOG3120	R	Predicted haloacid dehalogenase-like hydrolase	acid phosphatase	None	None	None	None	None	None	None	None	None	None	None	0.327	-0.229
162.m02962	CNAG_04515	None	None	None	None	None	None	None	KOG2491	Y	Nuclear matrix protein	conserved hypothetical protein	None	None	None	None	None	None	None	None	None	None	None	0.188	-0.299
162.m03028	CNAG_07758	None	None	None	None	None	None	None	KOG4814	S	Uncharacterized conserved protein	conserved hypothetical protein	None	None	None	None	None	None	None	None	None	None	None	0.429	-0.037
162.m03032	CNAG_04146	None	None	None	None	None	None	None	KOG2084	B	Predicted histone tail methylase containing SET domain	conserved hypothetical protein	None	None	None	None	None	None	None	None	None	None	None	0.271	-0.18
162.m03035	CNAG_04173	None	None	None	None	None	None	None	None	None	None	conserved hypothetical protein	None	None	None	None	None	None	None	None	Cne_OxR-dw_2.0	None	Cne_OxSR-dw_2.0	0.337	0.003
162.m03580	CNAG_04218	None	None	None	None	None	None	None	None	None	None	conserved hypothetical protein	None	None	None	None	None	None	None	None	None	None	None	0.271	-0.073
162.m03600	CNAG_04244	None	None	None	None	None	None	None	KOG2615	R	Permease of the major facilitator superfamily	conserved hypothetical protein	None	None	None	None	None	None	None	None	None	None	None	0.257	-0.079
162.m03602	CNAG_04275	None	None	None	None	None	None	None	KOG2661	O	Peptidase family M48	metalloendopeptidase	None	None	None	None	Cne_OsR-dw_2.0	None	Cne_FxR-dw_2.0	None	None	None	None	0.264	-0.073
162.m03607	CNAG_04111	None	None	SPCC126.08c	None	orf19.2200	ca2436	IPF5500	KOG3839	U	Lectin VIP36, involved in the transport of glycoproteins carrying high mannose-type glycans	lectin	None	lectin (predicted)	unknown function	None	None	None	None	None	None	None	None	0.269	-0.099
162.m03611	CNAG_04478	None	None	None	None	None	None	None	KOG1808	R	AAA ATPase containing von Willebrand factor type A (vWA) domain	conserved hypothetical protein	None	None	None	None	None	None	None	None	None	None	None	0.143	-0.282
162.m04518	CNAG_04475	None	None	SPAC5H10.03	None	None	None	None	KOG4754	G	Predicted phosphoglycerate mutase	conserved hypothetical protein	None	phosphoglycerate mutase family	None	None	None	None	None	Cne_OxR-up_2.0	None	Cne_OxSR-up_2.0	None	0.338	-0.027
162.m04549	CNAG_04319	None	None	None	None	None	None	None	KOG4828	S	Uncharacterized conserved protein	conserved hypothetical protein	None	None	None	None	None	None	None	None	None	None	None	0.322	-0.066
162.m04584	CNAG_04256	None	None	SPAC25H1.04	mug105	None	None	None	KOG4696	S	Uncharacterized conserved protein	conserved hypothetical protein	None	DUF1671 family protein	None	None	None	None	None	Cne_OxR-up_2.0	None	Cne_OxSR-up_2.0	None	0.341	-0.065
163.m02758	CNAG_01136	None	None	SPBC16A3.04	rsm25	None	None	None	None	None	None	conserved hypothetical protein	None	mitochondrial ribosomal protein subunit Rsm25	None	None	None	None	None	None	None	None	None	0.22	-0.227
163.m02932	CNAG_00967	None	None	None	None	None	None	None	KOG4197	R	FOG: PPR repeat	conserved hypothetical protein	None	None	None	None	None	None	None	None	None	None	None	0.351	-0.031
163.m03817	CNAG_00914	None	None	None	None	None	None	None	None	None	None	glucosidase	None	None	None	Cne_OsR-up_2.0	None	None	None	None	None	Cne_OsSR-up_2.0	None	0.36	-0.071
163.m03822	CNAG_00904	YKR105C	None	None	None	orf19.1942	ca3356	IPF9560	KOG0254	R	Predicted transporter (major facilitator superfamily)	aflatoxin efflux pump AFLT	None	None	unknown function	None	None	None	None	None	None	None	None	0.253	-0.198
163.m03829	CNAG_00938	None	None	None	None	None	None	None	KOG0714	O	Molecular chaperone (DnaJ superfamily)	conserved hypothetical protein	None	None	None	None	Cne_OsR-dw_2.0	None	None	Cne_OxR-up_2.0	None	Cne_OxSR-up_2.0	Cne_OsSR-dw_2.0	0.294	-0.074
163.m03925	CNAG_00990	None	None	SPBC29A3.10c	atp14	None	None	None	None	None	None	CIPB	None	F1-ATPase subunit H (predicted)	None	None	None	None	None	None	None	None	None	0.081	-0.303
163.m04752	CNAG_00901	None	None	None	None	None	None	None	None	None	None	conserved hypothetical protein	None	None	None	None	Cne_OsR-dw_2.0	None	None	None	None	None	Cne_OsSR-dw_2.0	0.194	-0.278
163.m04808	CNAG_01050	None	None	SPBC1921.06c	pvg3	None	None	None	KOG2287	G	Galactosyltransferases	conserved hypothetical protein	None	beta-1,3-galactosyltransferase	None	None	None	None	None	None	None	None	None	0.223	-0.257
163.m04810	CNAG_01020	None	None	None	None	None	None	None	None	None	None	conserved hypothetical protein	None	None	None	None	None	None	None	None	Cne_OxR-dw_2.0	None	Cne_OxSR-dw_2.0	0.249	-0.148
163.m06141	CNAG_01387	None	None	None	None	None	None	None	None	None	None	conserved hypothetical protein	None	None	None	None	None	None	None	None	None	None	None	0.36	-0.088
163.m06143	CNAG_01384	None	None	None	None	None	None	None	KOG2533	G	Permease of the major facilitator superfamily	bodown198	None	None	None	None	Cne_OsR-dw_2.0	None	Cne_FxR-dw_2.0	None	Cne_OxR-dw_2.0	None	Cne_CSR-dw_2.0	0.263	-0.129
163.m06204	CNAG_01150	None	None	None	None	orf19.118	ca0482	IPF14763	None	None	None	delta-12 fatty acid desaturase	None	None	delta-12 fatty acid desaturase (by homology)	None	None	None	None	Cne_OxR-up_2.0	None	Cne_OxSR-up_2.0	None	0.605	0.063
163.m06318	CNAG_01431	None	None	None	None	None	None	None	KOG0490	R	Transcription factor, contains HOX domain	conserved hypothetical protein	None	None	None	None	None	None	None	None	None	None	None	0.446	0.048
163.m06321	CNAG_01422	YBR287W	None	SPAC5D6.04	None	orf19.6117	ca0262	IPF20054	KOG2722	S	Predicted membrane protein	endoplasmic reticulum protein	None	auxin family transmembrane transporter (predicted)	None	None	None	None	None	Cne_OxR-up_2.0	None	Cne_OxSR-up_2.0	None	0.44	0.009
163.m06324	CNAG_01422	YBR287W	None	SPAC5D6.04	None	orf19.6117	ca0262	IPF20054	KOG2722	S	Predicted membrane protein	endoplasmic reticulum protein	None	auxin family transmembrane transporter (predicted)	None	None	None	None	None	Cne_OxR-up_2.0	None	Cne_OxSR-up_2.0	None	0.497	0.034
163.m06325	CNAG_01421	None	None	None	None	None	None	None	None	None	None	conserved hypothetical protein	None	None	None	None	None	None	None	None	None	None	None	0.192	-0.17
163.m06465	CNAG_06949	None	None	None	None	None	None	None	None	None	None	hypothetical protein	None	None	None	None	None	None	Cne_FxR-dw_2.0	None	Cne_OxR-dw_2.0	None	None	0.008	-0.6
163.m06520	CNAG_01347	None	None	SPBC543.02c	None	orf19.3592	ca0872	IPF13100	KOG0624	V	dsRNA-activated protein kinase inhibitor P58, contains TPR and DnaJ domains	co-chaperone	None	DNAJ/TPR domain protein DNAJC7 family	unknown function	None	None	None	None	None	None	None	None	0.375	-0.007
163.m06523	CNAG_01341	None	None	None	None	None	None	None	KOG1735	Z	Actin depolymerizing factor	mannose-6-phosphate isomerase	None	None	None	None	Cne_OsR-dw_2.0	None	None	None	None	None	Cne_OsSR-dw_2.0	0.642	0.258
163.m06524	CNAG_01341	None	None	None	None	None	None	None	KOG1735	Z	Actin depolymerizing factor	mannose-6-phosphate isomerase	None	None	None	None	Cne_OsR-dw_2.0	None	None	None	None	None	Cne_OsSR-dw_2.0	0.627	0.24
163.m06527	CNAG_01331	None	None	None	None	None	None	None	None	None	None	conserved hypothetical protein	None	None	None	None	None	None	None	None	None	None	None	0.493	0.111
163.m06530	CNAG_01322	None	None	None	None	None	None	None	KOG1064	R	RAVE (regulator of V-ATPase assembly) complex subunit RAV1/DMX protein, WD repeat superfamily	conserved hypothetical protein	None	None	None	None	None	None	None	None	None	None	None	0.361	-0.026
163.m06554	None	None	None	None	None	None	None	None	None	None	None	None	None	None	None	None	None	None	None	None	None	None	None	0.066	0.619
163.m06562	None	None	None	None	None	None	None	None	None	None	None	None	None	None	None	None	None	None	None	None	None	None	None	0.598	-0.402
163.m06575	CNAG_00902	None	None	None	None	None	None	None	KOG4267	S	Predicted membrane protein	conserved hypothetical protein	None	None	None	None	None	None	None	None	Cne_OxR-dw_2.0	None	Cne_OxSR-dw_2.0	0.297	-0.188
163.m06614	CNAG_01440	None	None	SPAC31G5.12c	maf1	None	None	None	KOG3104	K	Mod5 protein sorting/negative effector of RNA Pol III synthesis	conserved hypothetical protein	None	repressor of RNA polymerase III Maf1 (predicted)	None	None	None	None	None	None	None	None	None	0.422	0.089
164.m01452	CNAG_06173	YMR130W	None	SPAC7D4.05	None	orf19.2076	ca4821	IPF1197	KOG3085	R	Predicted hydrolase (HAD superfamily)	conserved hypothetical protein	None	hydrolase (predicted)	unknown function	None	None	None	None	None	Cne_OxR-dw_2.0	None	Cne_OxSR-dw_2.0	0.258	-0.069
164.m01563	CNAG_06064	None	None	SPAC11E3.09	pyp3	None	None	None	KOG0791	T	Protein tyrosine phosphatase, contains fn3 domain	conserved hypothetical protein	None	protein-tyrosine phosphatase Pyp3	None	None	Cne_OsR-dw_2.0	None	Cne_FxR-dw_2.0	None	Cne_OxR-dw_2.0	None	Cne_CSR-dw_2.0	0.232	-0.123
164.m01643	CNAG_05998	None	None	None	None	None	None	None	KOG0393	R	Ras-related small GTPase, Rho type	rho GTPase	None	None	None	None	None	None	None	None	None	None	None	0.216	-0.099
164.m01996	CNAG_06029	YOL114C	None	None	None	orf19.425	ca4050	IPF20007	KOG3429	J	Predicted peptidyl-tRNA hydrolase	conserved hypothetical protein	None	None	unknown function	None	None	None	None	None	None	None	None	0.288	-0.099
164.m02001	CNAG_07703	None	None	None	None	None	None	None	None	None	None	conserved hypothetical protein	None	None	None	None	None	None	None	Cne_OxR-up_2.0	None	Cne_OxSR-up_2.0	None	0.247	-0.144
164.m02040	CNAG_06016	None	None	None	None	None	None	None	KOG2169	K	Zn-finger transcription factor	CAP6p	None	None	None	None	None	None	None	None	None	None	None	0.466	-0.015
164.m02081	CNAG_06102	None	None	None	None	None	None	None	KOG0749	C	Mitochondrial ADP/ATP carrier proteins	eukaryotic ADP/ATP carrier	None	None	None	None	None	None	None	None	None	None	None	0.228	-0.116
164.m02105	CNAG_06128	None	None	None	None	None	None	None	KOG0570	K	Transcriptional coactivator	conserved hypothetical protein	None	None	None	None	None	None	None	None	None	None	None	0.207	-0.156
164.m02126	CNAG_06143	None	None	SPBC13G1.04c	None	None	None	None	KOG2731	A	DNA alkylation damage repair protein	conserved hypothetical protein	None	alkB homolog	None	None	None	None	None	None	None	None	None	0.4	-0.033
164.m02137	CNAG_06170	YJL068C	None	None	None	orf19.6596	ca3836	IPF8179	None	None	None	carboxylesterase	None	None	putative esterase (by homology)	None	None	None	None	None	Cne_OxR-dw_2.0	None	Cne_OxSR-dw_2.0	0.251	-0.139
164.m02218	CNAG_04246	None	None	None	None	None	None	None	KOG2280	U	Vacuolar assembly/sorting protein VPS16	conserved hypothetical protein	None	None	None	None	None	None	None	None	None	None	None	0.181	-0.324
164.m02814	CNAG_06191	None	None	None	None	None	None	None	None	None	None	conserved hypothetical protein	None	None	None	None	None	None	None	None	None	None	None	0.216	-0.192
164.m02825	CNAG_06048	None	None	SPAC227.06	None	orf19.4922	ca3594	IPF6076	KOG3114	S	Uncharacterized conserved protein	conserved hypothetical protein	None	Rab GTPase binding (predicted)	unknown function	None	None	None	None	None	None	None	None	0.228	-0.136
167.m03169	CNAG_02549	None	None	None	None	None	None	None	KOG2517	G	Ribulose kinase and related carbohydrate kinases	conserved hypothetical protein	None	None	None	None	None	None	None	None	None	None	None	0.348	-0.319
167.m03203	None	None	None	None	None	None	None	None	None	None	None	None	None	None	None	None	None	None	None	None	None	None	None	0.14	0.671
167.m03228	CNAG_02489	None	None	SPCC13B11.01	adh1	None	None	None	KOG0023	Q	Alcohol dehydrogenase, class V	mannitol-1-phosphate dehydrogenase	None	alcohol dehydrogenase Adh1	None	None	None	None	None	None	None	None	None	0.533	0.113
167.m03269	CNAG_02444	YJR008W	None	SPAC4H3.04c	None	orf19.7210	ca5336	IPF893	KOG3086	R	Predicted dioxygenase	UPF0103 protein	None	UPF0103 family	unknown function	None	None	None	None	None	None	None	None	0.589	0.324
167.m03586	CNAG_02089	None	None	None	None	None	None	None	KOG4177	M	Ankyrin	conserved hypothetical protein	None	None	None	None	None	None	None	Cne_OxR-up_2.0	None	Cne_OxSR-up_2.0	None	0.396	-0.21
167.m03643	CNAG_02024	None	None	None	None	None	None	None	None	None	None	conserved hypothetical protein	None	None	None	None	None	None	None	None	None	None	None	0.26	-0.323
167.m03669	None	None	None	None	None	None	None	None	None	None	None	None	None	None	None	None	None	None	None	None	None	None	None	0.151	0.697
167.m03678	None	None	None	None	None	None	None	None	None	None	None	None	None	None	None	None	None	None	None	Cne_OxR-up_2.0	None	Cne_OxSR-up_2.0	None	0.211	0.426
167.m05840	CNAG_02135	None	None	None	None	None	None	None	None	None	None	conserved hypothetical protein	None	None	None	None	None	None	None	None	None	None	None	0.326	-0.245
167.m05878	CNAG_02218	None	None	None	None	None	None	None	None	None	None	conserved hypothetical protein	None	None	None	None	None	None	None	None	None	None	None	0.555	0.067
167.m05899	CNAG_02263	None	None	None	None	None	None	None	KOG1870	O	Ubiquitin C-terminal hydrolase	conserved hypothetical protein	None	None	None	None	Cne_OsR-dw_2.0	None	Cne_FxR-dw_2.0	None	None	None	None	0.361	0.08
167.m05981	CNAG_02061	None	None	None	None	None	None	None	None	None	None	conserved hypothetical protein	None	None	None	None	None	None	None	Cne_OxR-up_2.0	None	Cne_OxSR-up_2.0	None	-0.49	1.4
176.m02142	None	None	None	None	None	None	None	None	None	None	None	None	None	None	None	None	None	None	None	None	None	None	None	-0.214	1.238
176.m02237	CNAG_07571	None	None	None	None	None	None	None	None	None	None	conserved hypothetical protein	None	None	None	None	None	None	None	None	None	None	None	0.53	0.123
176.m02277	CNAG_07533	None	None	None	None	None	None	None	None	None	None	conserved hypothetical protein	None	None	None	None	Cne_OsR-dw_2.0	None	Cne_FxR-dw_2.0	None	Cne_OxR-dw_2.0	None	Cne_CSR-dw_2.0	0.142	-0.672
176.m02299	CNAG_02673	None	None	None	None	None	None	None	KOG1502	V	Flavonol reductase/cinnamoyl-CoA reductase	NAD dependent epimerase/dehydratase family protein	None	None	None	None	None	None	None	None	None	None	None	0.516	-0.069
176.m02301	None	None	None	None	None	None	None	None	None	None	None	None	None	None	None	None	None	None	None	None	None	None	None	0.472	-0.007
176.m02302	CNAG_02676	None	None	None	None	None	None	None	None	None	None	conserved hypothetical protein	None	None	None	None	None	None	None	None	None	None	None	0.262	-0.221
176.m02313	CNAG_02687	None	None	None	None	None	None	None	KOG3417	T	Ras1 guanine nucleotide exchange factor	conserved hypothetical protein	None	None	None	None	None	None	None	None	Cne_OxR-dw_2.0	None	Cne_OxSR-dw_2.0	0.194	-0.163
176.m02319	CNAG_02693	None	None	None	None	orf19.4583	ca5146	YMC2	KOG0758	C	Mitochondrial carnitine-acylcarnitine carrier protein	conserved hypothetical protein	None	None	Carnitine/acylcarnitine translocase (by homology)	None	None	None	None	None	None	None	None	0.342	-0.079
176.m02407	CNAG_01936	None	None	None	None	None	None	None	KOG0254	R	Predicted transporter (major facilitator superfamily)	sugar transporter	None	None	None	None	None	None	None	None	None	None	None	0.231	-0.152
176.m02461	CNAG_02001	None	None	None	None	None	None	None	KOG0565	U	Inositol polyphosphate 5-phosphatase and related proteins	inositol-polyphosphate 5-phosphatase	None	None	None	None	None	None	None	None	None	None	None	0.175	-0.24
176.m02470	CNAG_02010	None	None	None	None	None	None	None	KOG2533	G	Permease of the major facilitator superfamily	tartrate transporter	None	None	None	None	None	None	None	None	None	None	None	0.232	-0.237
176.m02512	CNAG_02585	None	None	None	None	None	None	None	None	None	None	RfeF	None	None	None	None	None	None	None	Cne_OxR-up_2.0	None	Cne_OxSR-up_2.0	None	0.189	-0.124
176.m02518	CNAG_07545	None	None	None	None	None	None	None	None	None	None	nuclear protein	None	None	None	None	None	None	None	None	None	None	None	0.308	-0.097
176.m02573	CNAG_07556	None	None	None	None	None	None	None	KOG3736	O	Polypeptide N-acetylgalactosaminyltransferase	conserved hypothetical protein	None	None	None	None	None	None	None	None	None	None	None	0.334	-0.085
177.m02858	CNAG_06968	None	None	None	None	None	None	None	KOG1808	R	AAA ATPase containing von Willebrand factor type A (vWA) domain	hypothetical protein	None	None	None	None	None	None	None	None	Cne_OxR-dw_2.0	None	Cne_OxSR-dw_2.0	0.304	-0.176
177.m02862	CNAG_07752	None	None	None	None	None	None	None	None	None	None	UDP-galactopyranose mutase	None	None	None	None	None	None	None	None	Cne_OxR-dw_2.0	None	Cne_OxSR-dw_2.0	0.38	-0.237
177.m02887	CNAG_03572	None	None	None	None	None	None	None	None	None	None	opsin 1	None	None	None	None	None	None	None	Cne_OxR-up_2.0	None	Cne_OxSR-up_2.0	None	0.363	-0.1
177.m02933	None	None	None	None	None	None	None	None	None	None	None	None	None	None	None	None	None	None	None	None	None	None	None	0.188	0.759
177.m02948	CNAG_03494	None	None	None	None	None	None	None	KOG2242	A	Scaffold/matrix specific factor hnRNP-U/SAF-A, contains SPRY domain	conserved hypothetical protein	None	None	None	None	None	None	None	None	None	None	None	0.035	0.453
177.m02953	CNAG_03489	None	None	SPAC22E12.02	None	orf19.444	ca4066	IPF5925	KOG0226	R	RNA-binding proteins	RNA recognition domain-containing protein (RRM)-containing protein	None	RNA-binding protein	RNA-binding protein (by homology)	None	None	None	None	None	None	None	None	0.297	-0.191
177.m02990	CNAG_03447	None	None	None	None	None	None	None	None	None	None	conserved hypothetical protein	None	None	None	None	None	None	None	None	None	None	None	0.241	-0.12
177.m02994	CNAG_03441	None	None	None	None	None	None	None	None	None	None	conserved hypothetical protein	None	None	None	None	None	None	None	None	Cne_OxR-dw_2.0	None	Cne_OxSR-dw_2.0	0.146	-0.307
177.m03097	CNAG_03322	None	None	SPBPB2B2.11	None	orf19.3674	ca4043	IPF5291	KOG1429	GM	dTDP-glucose 4-6-dehydratase/UDP-glucuronic acid decarboxylase	UDP-xylose synthase	None	nucleotide-sugar 4,6-dehydratase (predicted)	UDP-glucose 4-epimerase (by homology)	None	None	None	None	None	Cne_OxR-dw_2.0	None	Cne_OxSR-dw_2.0	0.197	-0.29
177.m03154	CNAG_03261	None	None	None	None	None	None	None	KOG2893	R	Zn finger protein	zinc finger protein 207	None	None	None	None	None	None	None	None	Cne_OxR-dw_2.0	None	Cne_OxSR-dw_2.0	0.2	-0.017
177.m03172	CNAG_03240	None	None	None	None	None	None	None	KOG2431	G	1, 2-alpha-mannosidase	mannosyl-oligosaccharide 1,2-alpha-mannosidase	None	None	None	None	None	None	None	None	None	None	None	0.23	-0.068
177.m03200	CNAG_03213	None	None	SPBC19C7.09c	uve1	None	None	None	None	None	None	UV-endonuclease UVE-1	None	endonuclease Uve1	None	None	None	None	None	Cne_OxR-up_2.0	None	Cne_OxSR-up_2.0	None	0.333	-0.023
177.m03209	CNAG_07716	None	None	None	None	None	None	None	KOG1117	TZ	Rho- and Arf-GTPase activating protein ARAP3	conserved hypothetical protein	None	None	None	None	None	None	None	Cne_OxR-up_2.0	None	Cne_OxSR-up_2.0	None	0.192	-0.127
177.m03217	CNAG_03189	YPR089W	None	SPAC25B8.08	None	orf19.757	ca0049	IPF3908	None	None	None	DIL and Ankyrin domain-containing protein	None	conserved fungal family	unknown function	None	None	None	None	None	None	None	None	0.374	-0.058
177.m03224	CNAG_03182	None	None	None	None	None	None	None	KOG3263	R	Nucleic acid binding protein	conserved hypothetical protein	None	None	None	None	None	None	None	Cne_OxR-up_2.0	None	Cne_OxSR-up_2.0	None	0.359	-0.1
177.m03226	CNAG_07715	None	None	None	None	None	None	None	KOG1142	K	Transcription initiation factor TFIID, subunit TAF12 (also component of histone acetyltransferase SAGA)	conserved hypothetical protein	None	None	None	None	None	None	None	None	None	None	None	0.056	-0.523
177.m03265	CNAG_03142	None	None	None	None	None	None	None	None	None	None	conserved hypothetical protein	None	None	None	None	None	None	None	None	None	None	None	0.65	0.151
177.m03275	CNAG_03130	None	None	None	None	None	None	None	KOG0393	R	Ras-related small GTPase, Rho type	signal transducer	None	None	None	None	None	None	None	None	None	None	None	0.334	-0.021
177.m03285	CNAG_03118	None	None	None	None	None	None	None	KOG1994	A	Predicted RNA binding protein, contains G-patch and Zn-finger domains	conserved hypothetical protein	None	None	None	None	None	None	None	None	None	None	None	0.123	-0.407
177.m03302	CNAG_03099	None	None	None	None	None	None	None	KOG2571	M	Chitin synthase/hyaluronan synthase (glycosyltransferases)	chitin synthase 1	None	None	None	None	None	None	None	None	None	None	None	0.294	-0.243
177.m03306	None	None	None	None	None	None	None	None	None	None	None	None	None	None	None	None	None	None	None	None	None	None	None	0.035	0.605
177.m03382	CNAG_03465	None	None	None	None	None	None	None	KOG1263	Q	Multicopper oxidases	laccase	None	None	None	None	None	None	None	None	None	None	None	-0.207	0.777
179.m00006	CNAG_06963	None	None	None	None	None	None	None	KOG0254	R	Predicted transporter (major facilitator superfamily)	sugar transporter	None	None	None	Cne_OsR-up_2.0	None	None	None	None	None	Cne_OsSR-up_2.0	None	0.226	-0.269
179.m00046	CNAG_03038	None	None	SPAC12B10.13	None	None	None	None	KOG2659	Z	LisH motif-containing protein	conserved hypothetical protein	None	CTLH domain	None	Cne_OsR-up_2.0	None	Cne_FxR-up_2.0	None	None	None	None	None	0.229	-0.242
179.m00068	CNAG_03012	None	None	None	None	None	None	None	None	None	None	hypothetical protein	None	None	None	None	None	None	None	None	None	None	None	0.403	-0.094
179.m00069	CNAG_03012	None	None	None	None	None	None	None	None	None	None	hypothetical protein	None	None	None	None	None	None	None	None	None	None	None	0.382	0.043
179.m00070	CNAG_03012	None	None	None	None	None	None	None	None	None	None	hypothetical protein	None	None	None	None	None	None	None	None	None	None	None	0.387	-0.015
179.m00080	CNAG_01499	YIL166C	None	None	None	orf19.6520	ca4956	IPF4583	KOG2533	G	Permease of the major facilitator superfamily	conserved hypothetical protein	None	None	putative allantoate permease (by homology)	None	None	None	None	None	None	None	None	0.532	0.095
179.m00083	CNAG_01573	None	None	None	None	None	None	None	KOG4364	B	Chromatin assembly factor-I	conserved hypothetical protein	None	None	None	None	None	None	None	None	None	None	None	0.314	-0.007
179.m00123	CNAG_01621	None	None	None	None	None	None	None	None	None	None	conserved hypothetical protein	None	None	None	None	None	None	None	None	None	None	None	0.669	-0.059
179.m00125	CNAG_01625	None	None	None	None	None	None	None	KOG2793	A	Putative N2,N2-dimethylguanosine tRNA methyltransferase	conserved hypothetical protein	None	None	None	None	None	None	None	None	None	None	None	0.372	-0.168
179.m00166	CNAG_01671	None	None	None	None	None	None	None	KOG0540	EI	3-Methylcrotonyl-CoA carboxylase, non-biotin containing subunit/Acetyl-CoA carboxylase carboxyl transferase, subunit beta	acetyl/propionyl CoA carboxylase	None	None	None	None	None	None	None	Cne_OxR-up_2.0	None	Cne_OxSR-up_2.0	None	0.366	-0.045
179.m00169	CNAG_01674	None	None	None	None	None	None	None	KOG2533	G	Permease of the major facilitator superfamily	MFS transporter	None	None	None	None	None	None	None	None	None	None	None	0.37	0.018
179.m00189	CNAG_01696	None	None	SPCC4G3.14	mdj1	orf19.6672	ca4275	MDJ1	KOG0715	O	Molecular chaperone (DnaJ superfamily)	DNAj protein	None	DNAJ domain protein Mdj1 (predicted)	Heat shock protein - chaperone (by homology)	None	None	None	Cne_FxR-dw_2.0	None	Cne_OxR-dw_2.0	None	None	0.381	-0.069
179.m00220	CNAG_01735	None	None	None	None	None	None	None	KOG0053	E	Cystathionine beta-lyases/cystathionine gamma-synthases	conserved hypothetical protein	None	None	None	None	None	None	None	None	None	None	None	0.52	-0.034
179.m00234	CNAG_01753	None	None	None	None	None	None	None	KOG0392	K	SNF2 family DNA-dependent ATPase domain-containing protein	conserved hypothetical protein	None	None	None	None	None	None	None	Cne_OxR-up_2.0	None	Cne_OxSR-up_2.0	None	0.232	-0.117
179.m00342	CNAG_02769	None	None	None	None	None	None	None	KOG1239	OU	Inner membrane protein translocase involved in respiratory chain assembly	conserved hypothetical protein	None	None	None	None	None	None	None	None	None	None	None	0.225	-0.271
179.m00343	CNAG_02775	None	None	None	None	None	None	None	None	None	None	conserved hypothetical protein	None	None	None	None	Cne_OsR-dw_2.0	None	None	None	Cne_OxR-dw_2.0	None	None	1.183	-1.222
179.m00348	CNAG_02782	YHL039W	None	SPBC1709.13c	None	orf19.7326	None	None	KOG1337	R	N-methyltransferase	cytoplasmic protein	None	lysine methyltransferase (predicted)	None	None	None	None	None	None	None	None	None	0.306	-0.173
179.m00352	CNAG_02788	None	None	None	None	None	None	None	None	None	None	conserved hypothetical protein	None	None	None	None	None	None	None	None	None	None	None	0.422	0.087
179.m00354	CNAG_02790	None	None	None	None	None	None	None	KOG1950	G	Glycosyl transferase, family 8 - glycogenin	galactinol synthase	None	None	None	None	None	None	None	None	None	None	None	0.248	-0.219
179.m00384	CNAG_02833	None	None	None	None	None	None	None	KOG3468	C	NADH:ubiquinone oxidoreductase, NDUFB7/B18 subunit	conserved hypothetical protein	None	None	None	None	None	None	None	None	Cne_OxR-dw_2.0	None	Cne_OxSR-dw_2.0	0.245	-0.183
179.m00505	CNAG_02967	None	None	SPAC9E9.15	None	None	None	None	None	None	None	conserved hypothetical protein	None	CIA30 family protein	None	None	Cne_OsR-dw_2.0	None	Cne_FxR-dw_2.0	None	None	None	None	0.488	0.019
179.m00539	CNAG_01558	None	None	None	None	None	None	None	KOG0024	Q	Sorbitol dehydrogenase	zinc-binding dehydrogenase	None	None	None	None	None	None	None	None	Cne_OxR-dw_2.0	None	Cne_OxSR-dw_2.0	0.532	0.047
179.m00590	CNAG_01491	YGL242C	None	SPAC105.02c	None	orf19.7109	ca5591	IPF5618	None	None	None	conserved hypothetical protein	None	ankyrin repeat protein, unknown biological role	unknown function	None	None	None	None	None	None	None	None	0.301	-0.148
179.m00652	None	None	None	None	None	None	None	None	None	None	None	None	None	None	None	None	None	None	None	None	None	None	None	0.318	-0.232
179.m00668	CNAG_01760	None	None	None	None	None	None	None	KOG1980	S	Uncharacterized conserved protein	conserved hypothetical protein	None	None	None	None	None	None	None	None	None	None	None	0.153	-0.394
179.m00672	CNAG_01814	None	None	None	None	None	None	None	KOG1217	T	Fibrillins and related proteins containing Ca2+-binding EGF-like domains	conserved hypothetical protein	None	None	None	Cne_OsR-up_2.0	None	None	None	None	None	Cne_OsSR-up_2.0	None	0.113	0.469
179.m00687	CNAG_02740	None	None	SPAC3A12.04c	None	None	None	None	KOG2363	J	Protein subunit of nuclear ribonuclease P (RNase P)	conserved hypothetical protein	None	RNase P and RNase MRP subunit p30 (predicted)	None	Cne_OsR-up_2.0	None	None	None	None	None	Cne_OsSR-up_2.0	None	0.179	0.68
179.m00728	CNAG_02996	None	None	None	None	orf19.2284	ca0997	IPF9998	KOG0986	T	G protein-coupled receptor kinase	flavoprotein oxygenase	None	None	unknown function	None	None	Cne_FxR-up_2.0	None	None	None	Cne_FxSR-up_2.0	None	0.262	0.517
179.m05154	CNAG_02716	None	None	None	None	None	None	None	KOG4682	R	Uncharacterized conserved protein, contains BTB/POZ domain	conserved hypothetical protein	None	None	None	None	None	None	None	Cne_OxR-up_2.0	None	Cne_OxSR-up_2.0	None	0.381	-0.19
180.m00003	CNAG_05979	None	None	None	None	None	None	None	KOG0069	C	Glyoxylate/hydroxypyruvate reductase (D-isomer-specific 2-hydroxy acid dehydrogenase superfamily)	phosphoglycerate dehydrogenase	None	None	None	None	None	None	None	None	None	None	None	0.284	-0.301
180.m00017	CNAG_07695	None	None	SPAC9.10	thi9	None	None	None	KOG1289	E	Amino acid transporters	gamma-aminobutyric acid transporter	None	thiamine transporter Thi9	None	None	Cne_OsR-dw_2.0	None	Cne_FxR-dw_2.0	None	Cne_OxR-dw_2.0	None	Cne_CSR-dw_2.0	0.16	-0.214
180.m00018	CNAG_07695	None	None	SPAC9.10	thi9	None	None	None	KOG1289	E	Amino acid transporters	gamma-aminobutyric acid transporter	None	thiamine transporter Thi9	None	None	Cne_OsR-dw_2.0	None	Cne_FxR-dw_2.0	None	Cne_OxR-dw_2.0	None	Cne_CSR-dw_2.0	0.212	-0.242
180.m00019	CNAG_07695	None	None	SPAC9.10	thi9	None	None	None	KOG1289	E	Amino acid transporters	gamma-aminobutyric acid transporter	None	thiamine transporter Thi9	None	None	Cne_OsR-dw_2.0	None	Cne_FxR-dw_2.0	None	Cne_OxR-dw_2.0	None	Cne_CSR-dw_2.0	0.238	-0.127
180.m00054	CNAG_05861	None	None	None	None	None	None	None	KOG2294	K	Transcription factor of the Forkhead/HNF3 family	conserved hypothetical protein	None	None	None	None	None	None	None	Cne_OxR-up_2.0	None	Cne_OxSR-up_2.0	None	0.538	0.051
180.m00068	CNAG_05844	None	None	SPAC13G6.04	tim8	None	None	None	KOG3489	U	Mitochondrial import inner membrane translocase, subunit TIM8	mitochondrial import inner membrane translocase subunit TIM8	None	TIM22 inner membrane protein import complex subunit Tim8 (predicted)	None	None	None	None	None	None	None	None	None	0.115	-0.424
180.m00083	CNAG_05805	None	None	None	None	None	None	None	KOG4466	DK	Component of histone deacetylase complex (breast carcinoma metastasis suppressor 1 protein in human)	conserved hypothetical protein	None	None	None	None	None	None	None	None	None	None	None	0.03	-0.598
180.m00127	CNAG_05683	None	None	None	None	None	None	None	KOG0244	Z	Kinesin-like protein	conserved hypothetical protein	None	None	None	None	None	None	None	None	None	None	None	0.704	0.12
180.m00161	CNAG_06671	None	None	None	None	None	None	None	KOG0192	T	Tyrosine kinase specific for activated (GTP-bound) p21cdc42Hs	TKL-group protein kinase	None	None	None	None	None	None	None	None	None	None	None	0.294	0.017
180.m00170	CNAG_06658	None	None	None	None	orf19.5234	ca5013	IPF13941	KOG2289	T	Rhomboid family proteins	rhomboid family membrane protein	None	None	Unknown function	None	None	None	Cne_FxR-dw_2.0	Cne_OxR-up_2.0	None	Cne_OxSR-up_2.0	Cne_FxSR-dw_2.0	0.258	-0.133
180.m00179	CNAG_06631	None	None	None	None	None	None	None	KOG1836	W	Extracellular matrix glycoprotein Laminin subunits alpha and gamma	myosin heavy chain	None	None	None	None	None	None	None	None	None	None	None	0.403	0.059
180.m00208	CNAG_06580	None	None	None	None	None	None	None	KOG0017	R	FOG: Transposon-encoded proteins with TYA, reverse transcriptase, integrase domains in various combinations	VosA	None	None	None	None	None	None	None	None	Cne_OxR-dw_2.0	None	Cne_OxSR-dw_2.0	0.158	-0.336
180.m00211	CNAG_06577	None	None	None	None	None	None	None	None	None	None	conserved hypothetical protein	None	None	None	None	Cne_OsR-dw_2.0	None	None	None	None	None	Cne_OsSR-dw_2.0	0.539	0.001
180.m00213	CNAG_06574	None	None	None	None	None	None	None	None	None	None	antiphagocytic protein 1	None	None	None	None	Cne_OsR-dw_2.0	None	None	None	None	None	Cne_OsSR-dw_2.0	0.597	0.108
180.m00241	CNAG_06531	None	None	None	None	None	None	None	None	None	None	conserved hypothetical protein	None	None	None	None	None	None	None	None	None	None	None	0.246	-0.168
180.m00249	CNAG_07688	None	None	None	None	None	None	None	KOG1363	T	Predicted regulator of the ubiquitin pathway (contains UAS and UBX domains)	conserved hypothetical protein	None	None	None	None	None	None	None	None	None	None	None	0.516	0.272
180.m00302	CNAG_05845	None	None	SPAC31G5.21	None	None	None	None	KOG3410	S	Conserved alpha-helical protein	conserved hypothetical protein	None	human family 32A homolog	None	None	None	None	None	Cne_OxR-up_2.0	None	Cne_OxSR-up_2.0	None	0.181	-0.387
180.m00314	CNAG_05833	None	None	None	None	None	None	None	KOG2533	G	Permease of the major facilitator superfamily	allantoate transporter	None	None	None	None	None	None	None	None	None	None	None	0.063	-0.799
180.m00358	CNAG_05741	None	None	None	None	None	None	None	None	None	None	conserved hypothetical protein	None	None	None	None	None	None	None	Cne_OxR-up_2.0	None	Cne_OxSR-up_2.0	None	0.181	-0.297
180.m00381	CNAG_05705	None	None	SPAC1071.11	None	None	None	None	None	None	None	conserved hypothetical protein	None	NADH-dependent flavin oxidoreductase (predicted)	None	None	None	None	None	None	None	None	None	0.295	-0.106
180.m00402	CNAG_05693	None	None	None	None	None	None	None	KOG1454	R	Predicted hydrolase/acyltransferase (alpha/beta hydrolase superfamily)	conserved hypothetical protein	None	None	None	Cne_OsR-up_2.0	None	None	None	None	None	Cne_OsSR-up_2.0	None	0.365	-0.081
180.m02970	CNAG_05876	None	None	None	None	None	None	None	None	None	None	conserved hypothetical protein	None	None	None	None	None	None	None	None	Cne_OxR-dw_2.0	None	Cne_OxSR-dw_2.0	0.378	0.018
181.m07803	CNAG_00023	None	None	SPBPB2B2.08	None	None	None	None	None	None	None	conserved hypothetical protein	None	conserved fungal protein	None	None	None	None	None	None	None	None	None	0.172	-0.343
181.m07966	CNAG_07322	None	None	None	None	None	None	None	KOG0866	U	Ran-binding protein RANBP3	conserved hypothetical protein	None	None	None	None	None	None	None	None	None	None	None	0.348	-0.022
181.m07996	CNAG_00243	None	None	None	None	None	None	None	None	None	None	conserved hypothetical protein	None	None	None	None	None	None	None	None	None	None	None	0.262	-0.373
181.m08013	CNAG_00261	None	None	None	None	None	None	None	KOG0939	OK	E3 ubiquitin-protein ligase/Putative upstream regulatory element binding protein	conserved hypothetical protein	None	None	None	None	None	None	None	None	None	None	None	0.413	-0.124
181.m08015	CNAG_00264	None	None	None	None	None	None	None	None	None	None	nuclease I	None	None	None	None	Cne_OsR-dw_2.0	None	None	None	None	None	Cne_OsSR-dw_2.0	0.359	-0.09
181.m08041	CNAG_00294	None	None	None	None	None	None	None	KOG1996	A	mRNA splicing factor	conserved hypothetical protein	None	None	None	None	None	None	None	None	None	None	None	0.28	-0.077
181.m08051	CNAG_00308	None	None	SPAC24C9.08	None	None	None	None	KOG2275	E	Aminoacylase ACY1 and related metalloexopeptidases	gly-X carboxypeptidase	None	vacuolar carboxypeptidase (predicted)	None	None	None	None	None	None	None	None	None	0.404	-0.106
181.m08055	CNAG_00313	None	None	None	None	None	None	None	KOG2352	E	Predicted spermine/spermidine synthase	conserved hypothetical protein	None	None	None	None	None	None	None	None	None	None	None	0.048	0.358
181.m08105	CNAG_00352	None	None	SPAC3H5.04	aar2	None	None	None	KOG3937	A	mRNA splicing factor	conserved hypothetical protein	None	U5 snRNP-associated protein Aar2	None	None	None	None	None	None	None	None	None	0.528	0.201
181.m08156	CNAG_00410	None	None	SPBC16H5.12c	None	orf19.216	ca3032	IPF12319	None	None	None	conserved hypothetical protein	None	conserved fungal protein	unknown function	None	None	None	None	None	None	None	None	0.085	-0.351
181.m08220	CNAG_00485	None	None	None	None	None	None	None	None	None	None	conserved hypothetical protein	None	None	None	None	Cne_OsR-dw_2.0	None	None	None	None	None	Cne_OsSR-dw_2.0	0.595	0.123
181.m08268	CNAG_00528	None	None	None	None	None	None	None	KOG0266	R	WD40 repeat-containing protein	WD-repeat protein	None	None	None	None	None	None	None	None	None	None	None	0.603	0.09
181.m08348	CNAG_00619	None	None	None	None	None	None	None	KOG2512	O	Beta-tubulin folding cofactor C	tubulin folding cofactor C	None	None	None	None	None	None	None	None	None	None	None	-0.576	0.565
181.m08370	CNAG_00642	None	None	None	None	None	None	None	KOG0994	W	Extracellular matrix glycoprotein Laminin subunit beta	conserved hypothetical protein	None	None	None	None	None	None	None	None	None	None	None	0.459	-0.009
181.m08410	CNAG_00686	None	None	None	None	None	None	None	None	None	None	conserved hypothetical protein	None	None	None	None	None	None	None	None	None	None	None	0.366	-0.039
181.m08415	CNAG_00691	None	None	None	None	None	None	None	None	None	None	conserved hypothetical protein	None	None	None	None	None	None	None	None	None	None	None	0.342	-0.038
181.m08432	CNAG_00711	None	None	None	None	None	None	None	None	None	None	conserved hypothetical protein	None	None	None	None	None	None	None	None	Cne_OxR-dw_2.0	None	Cne_OxSR-dw_2.0	0.425	0.028
181.m08472	CNAG_00753	None	None	None	None	None	None	None	KOG0980	Z	Actin-binding protein SLA2/Huntingtin-interacting protein Hip1	conserved hypothetical protein	None	None	None	None	None	None	None	None	None	None	None	0.34	-0.13
181.m08478	CNAG_00759	None	None	None	None	None	None	None	KOG1984	U	Vesicle coat complex COPII, subunit SFB3	conserved hypothetical protein	None	None	None	None	None	None	None	None	None	None	None	0.246	0.02
181.m08515	CNAG_00795	None	None	None	None	None	None	None	None	None	None	conserved hypothetical protein	None	None	None	None	None	None	None	None	None	None	None	0.325	-0.037
181.m08529	CNAG_00810	None	None	SPAC23C11.04c	pnk1	orf19.1547	ca3975	IPF20152	KOG2134	L	Polynucleotide kinase 3' phosphatase	polynucleotide kinase 3' phosphatase	None	DNA kinase/phosphatase Pnk1	unknown function	None	None	None	None	None	Cne_OxR-dw_2.0	None	Cne_OxSR-dw_2.0	0.123	-0.06
181.m08555	CNAG_00834	None	None	None	None	None	None	None	KOG2419	I	Phosphatidylserine decarboxylase	phosphatidylserine decarboxylase	None	None	None	None	Cne_OsR-dw_2.0	None	None	None	Cne_OxR-dw_2.0	None	None	0.878	0.354
181.m08719	CNAG_00164	None	None	None	None	None	None	None	KOG4294	PT	Non voltage-gated ion channels (DEG/ENaC family)	conserved hypothetical protein	None	None	None	None	None	None	None	None	None	None	None	0.276	-0.069
181.m08762	CNAG_00387	None	None	None	None	None	None	None	KOG4567	R	GTPase-activating protein	conserved hypothetical protein	None	None	None	None	None	None	None	None	None	None	None	-0.088	0.943
181.m08770	CNAG_00452	None	None	None	None	None	None	None	KOG0141	EI	Isovaleryl-CoA dehydrogenase	isovaleryl-CoA dehydrogenase 2	None	None	None	None	None	None	None	None	None	None	None	0.047	0.782
181.m08789	CNAG_00564	None	None	None	None	None	None	None	KOG1215	T	Low-density lipoprotein receptors containing Ca2+-binding EGF-like domains	conserved hypothetical protein	None	None	None	None	None	None	None	None	None	None	None	0.101	0.354
181.m08838	CNAG_00052	None	None	None	None	None	None	None	None	None	None	conserved hypothetical protein	None	None	None	None	None	None	Cne_FxR-dw_2.0	None	None	None	Cne_FxSR-dw_2.0	0.585	0.294
183.m01589	CNAG_07925	None	None	None	None	None	None	None	KOG4674	S	Uncharacterized conserved coiled-coil protein	conserved hypothetical protein	None	None	None	None	None	None	None	None	None	None	None	0.233	-0.463
183.m01595	CNAG_07921	None	None	None	None	None	None	None	None	None	None	conserved hypothetical protein	None	None	None	None	None	None	None	None	None	None	None	0.373	-0.136
183.m01609	CNAG_06293	None	None	None	None	None	None	None	None	None	None	conserved hypothetical protein	None	None	None	None	None	None	None	None	None	None	None	0.414	-0.064
183.m01614	CNAG_06298	None	None	None	None	None	None	None	None	None	None	conserved hypothetical protein	None	None	None	None	Cne_OsR-dw_2.0	None	Cne_FxR-dw_2.0	None	None	None	None	0.599	0.064
183.m01624	None	None	None	None	None	None	None	None	None	None	None	None	None	None	None	None	None	None	None	None	None	None	None	0.239	-0.165
183.m01655	CNAG_06356	YKL027W	None	SPAC1A6.10	None	orf19.2115	ca2730	IPF10325	KOG2018	O	Predicted dinucleotide-utilizing enzyme involved in molybdopterin and thiamine biosynthesis	mitochondrial protein	None	Moeb/ThiF domain	molybdopterin-converting factor by homology	None	None	None	None	None	Cne_OxR-dw_2.0	None	Cne_OxSR-dw_2.0	0.338	-0.126
183.m01656	CNAG_06357	None	None	None	None	None	None	None	KOG4852	S	Uncharacterized conserved protein	conserved hypothetical protein	None	None	None	None	None	None	None	None	None	None	None	0.356	-0.174
183.m01740	CNAG_06453	None	None	SPBC725.10	None	None	None	None	KOG3797	T	Peripheral-type benzodiazepine receptor and related proteins	conserved hypothetical protein	None	tspO homolog	None	None	None	None	None	None	None	None	None	0.368	-0.045
183.m01759	None	None	None	None	None	None	None	None	None	None	None	None	None	None	None	None	None	None	None	Cne_OxR-up_2.0	None	Cne_OxSR-up_2.0	None	0.228	0.765
183.m01901	CNAG_06504	None	None	None	None	None	None	None	KOG1187	T	Serine/threonine protein kinase	conserved hypothetical protein	None	None	None	None	None	None	None	None	None	None	None	0.182	0.627
184.m04328	None	None	None	None	None	None	None	None	None	None	None	None	None	None	None	None	None	Cne_FxR-up_2.0	None	None	None	Cne_FxSR-up_2.0	None	-0.24	0.348
184.m04393	CNAG_05405	None	None	None	None	None	None	None	KOG1510	K	RNA polymerase II holoenzyme and mediator subcomplex, subunit SURB7/SRB7	predicted protein	None	None	None	None	None	None	None	None	None	None	None	0.194	0.555
184.m04432	CNAG_00306	None	None	None	None	None	None	None	KOG1836	W	Extracellular matrix glycoprotein Laminin subunits alpha and gamma	conserved hypothetical protein	None	None	None	None	None	None	None	None	None	None	None	-0.995	0.335
184.m04637	None	None	None	None	None	None	None	None	None	None	None	None	None	None	None	None	None	None	None	None	None	None	None	-0.161	0.573
184.m04638	None	None	None	None	None	None	None	None	None	None	None	None	None	None	None	None	None	None	None	None	None	None	None	0.182	0.824
184.m04651	CNAG_05315	None	None	None	None	None	None	None	None	None	None	taurine catabolism dioxygenase TauD	None	None	None	None	None	None	None	None	None	None	None	0.32	0.631
184.m04710	CNAG_05253	None	None	None	None	None	None	None	None	None	None	conserved hypothetical protein	None	None	None	None	None	None	None	Cne_OxR-up_2.0	None	Cne_OxSR-up_2.0	None	0.276	-0.375
184.m04798	CNAG_05150	None	None	None	None	None	None	None	KOG0058	U	Peptide exporter, ABC superfamily	ATP-binding cassette	None	None	None	None	None	None	None	None	None	None	None	0.051	0.577
184.m04801	CNAG_05145	None	None	None	None	None	None	None	KOG1802	A	RNA helicase nonsense mRNA reducing factor (pNORF1)	DNA helicase	None	None	None	Cne_OsR-up_2.0	None	None	None	None	None	Cne_OsSR-up_2.0	None	-0.005	0.722
184.m04840	CNAG_05104	None	None	None	None	None	None	None	KOG0583	T	Serine/threonine protein kinase	CAMK-group protein kinase	None	None	None	None	None	None	None	None	None	None	None	0.333	0.184
184.m04991	CNAG_04935	None	None	None	None	None	None	None	KOG0516	Z	Dystonin, GAS (Growth-arrest-specific protein), and related proteins	conserved hypothetical protein	None	None	None	None	None	None	None	None	None	None	None	0.021	0.358
184.m04992	CNAG_05320	None	None	None	None	None	None	None	KOG2741	GQ	Dimeric dihydrodiol dehydrogenase	oxidoreductase family protein	None	None	None	None	None	None	None	None	None	None	None	0.3	0.606
184.m05204	CNAG_05012	None	None	None	None	None	None	None	KOG3544	W	Collagens (type IV and type XIII), and related proteins	conserved hypothetical protein	None	None	None	None	None	None	None	None	None	None	None	0.321	0.025
184.m05220	CNAG_07883	None	None	None	None	None	None	None	KOG1650	P	Predicted K+/H+-antiporter	conserved hypothetical protein	None	None	None	None	None	None	None	None	None	None	None	0.324	-0.043
185.m02345	CNAG_06602	None	None	SPCC757.03c	None	None	None	None	None	None	None	cysteine-type peptidase	None	ThiJ domain protein	None	None	None	Cne_FxR-up_2.0	None	None	None	Cne_FxSR-up_2.0	None	0.484	0.17
185.m02348	CNAG_04566	None	None	None	None	None	None	None	KOG0916	M	1,3-beta-glucan synthase/callose synthase catalytic subunit	beta-flanking protein	None	None	None	None	None	None	None	None	Cne_OxR-dw_2.0	None	Cne_OxSR-dw_2.0	0.338	-0.068
185.m02362	CNAG_07860	None	None	None	None	None	None	None	KOG0883	O	Cyclophilin type, U box-containing peptidyl-prolyl cis-trans isomerase	peptidyl-prolyl cis-trans isomerase-like 2	None	None	None	None	None	None	None	Cne_OxR-up_2.0	None	Cne_OxSR-up_2.0	None	0.081	0.925
185.m02381	CNAG_04597	None	None	None	None	None	None	None	KOG2816	R	Predicted transporter ADD1 (major facilitator superfamily)	conserved hypothetical protein	None	None	None	None	None	None	None	None	None	None	None	0.043	0.407
185.m02477	CNAG_04699	None	None	SPAC1782.03	None	None	None	None	KOG1425	Z	Microfibrillar-associated protein MFAP1	conserved hypothetical protein	None	microfibrillar-associated protein family protein	None	None	None	None	None	None	None	None	None	0.268	-0.632
185.m02486	CNAG_04707	None	None	None	None	None	None	None	None	None	None	conserved hypothetical protein	None	None	None	None	None	None	None	None	None	None	None	0.077	0.636
185.m02669	CNAG_04892	None	None	None	None	None	None	None	None	None	None	conserved hypothetical protein	None	None	None	None	None	None	None	None	None	None	None	0.021	0.72
185.m02681	CNAG_04903	None	None	None	None	None	None	None	KOG1808	R	AAA ATPase containing von Willebrand factor type A (vWA) domain	conserved hypothetical protein	None	None	None	None	None	None	None	None	None	None	None	0.886	0.489
186.m03424	CNAG_06791	None	None	None	None	None	None	None	None	None	None	conserved hypothetical protein	None	None	None	None	None	None	None	Cne_OxR-up_2.0	None	Cne_OxSR-up_2.0	None	0.496	0.159
186.m03464	CNAG_06752	None	None	None	None	None	None	None	KOG4308	S	LRR-containing protein	conserved hypothetical protein	None	None	None	Cne_OsR-up_2.0	None	None	None	None	None	Cne_OsSR-up_2.0	None	-0.07	0.445
186.m03703	CNAG_03782	None	None	None	None	None	None	None	KOG1870	O	Ubiquitin C-terminal hydrolase	conserved hypothetical protein	None	None	None	None	Cne_OsR-dw_2.0	Cne_FxR-up_2.0	None	Cne_OxR-up_2.0	None	None	Cne_OsSR-dw_2.0	-0.074	0.34
186.m03790	CNAG_03857	None	None	None	None	None	None	None	KOG1075	R	FOG: Reverse transcriptase	hypothetical protein	None	None	None	None	None	None	Cne_FxR-dw_2.0	Cne_OxR-up_2.0	None	Cne_OxSR-up_2.0	Cne_FxSR-dw_2.0	0.486	-0.291
186.m03810	CNAG_03878	None	None	SPBC83.15	None	orf19.2185	ca1770	IPF12457	KOG3881	S	Uncharacterized conserved protein	conserved hypothetical protein	None	ribosome biogenesis protein Nsa1	unknown function	None	None	None	None	None	None	None	None	0.41	0.022
186.m03871	CNAG_03945	None	None	None	None	None	None	None	KOG3175	R	Protein phosphatase 4 regulatory subunit 2 related protein	conserved hypothetical protein	None	None	None	None	None	None	None	None	None	None	None	0.145	0.443
186.m03875	CNAG_03951	None	None	None	None	None	None	None	None	None	None	conserved hypothetical protein	None	None	None	None	None	None	None	None	Cne_OxR-dw_2.0	None	Cne_OxSR-dw_2.0	-0.143	0.393
186.m03887	CNAG_03964	None	None	SPAC683.02c	None	None	None	None	KOG4400	O	E3 ubiquitin ligase interacting with arginine methyltransferase	zinc knuckle family protein	None	zf-CCHC type zinc finger protein	None	Cne_OsR-up_2.0	None	None	None	None	None	Cne_OsSR-up_2.0	None	0.095	0.463
186.m03970	CNAG_04040	YNR047W	None	SPAC4G8.05	ppk14	orf19.223	ca3029	IPF13825	KOG0610	R	Putative serine/threonine protein kinase	AGC/RSK protein kinase	None	serine/threonine protein kinase Ppk14 (predicted)	serine/threonine protein kinases (by homology)	None	None	None	None	None	None	None	None	0.335	-0.089
186.m04015	CNAG_04092	None	None	None	None	None	None	None	KOG0254	R	Predicted transporter (major facilitator superfamily)	sugar transporter	None	None	None	None	None	None	None	None	None	None	None	0.452	-0.005
186.m04036	CNAG_03667	None	None	None	None	None	None	None	KOG3819	S	Uncharacterized conserved proteins (Hepatitis delta antigen-interacting protein A)	conserved hypothetical protein	None	None	None	None	None	None	None	Cne_OxR-up_2.0	None	Cne_OxSR-up_2.0	None	0.529	-0.095
186.m04088	None	None	None	None	None	None	None	None	None	None	None	None	None	None	None	None	None	None	None	None	None	None	None	0.217	0.66
163.m06216	CNAG_01132	YDL213C	NOP6	SPBC365.04c	None	orf19.6236	ca3006	IPF12152	KOG0118	R	FOG: RRM domain	conserved hypothetical protein	Putative RNA-binding protein implicated in ribosome biogenesis; contains an RNA recognition motif (RRM) and has similarity to hydrophilins; NOP6 may be a fungal-specific gene as no homologs have been yet identified in higher eukaryotes	RNA-binding protein	unknown function	None	None	None	None	None	None	None	None	0.351	-0.146
163.m04814	CNAG_01363	YJR072C	NPA3	SPBC119.15	None	orf19.6463	ca3663	IPF11432	KOG1532	L	GTPase XAB1, interacts with DNA repair protein XPA	XPA-binding protein 1	Essential, conserved, cytoplasmic ATPase; phosphorylated by the Pcl1p-Pho85p kinase complex	AAA family ATPase, unknown biological role	unknown function	None	None	None	None	None	None	None	None	0.205	-0.177
163.m06480	CNAG_01298	YML059C	NTE1	SPCC4B3.04c	nte1	orf19.6396	None	None	KOG2968	R	Predicted esterase of the alpha-beta hydrolase superfamily (Neuropathy target esterase), contains cAMP-binding domains	hydrolase	Serine esterase that deacylates exogenous lysophospholipids, homolog of human neuropathy target esterase (NTE); mammalian NTE1 deacylates phosphatidylcholine to glycerophosphocholine	lysophospholipase	None	None	None	None	None	None	None	None	None	0.411	0.003
186.m04051	CNAG_03795	YML060W	OGG1	None	None	orf19.7190	ca5318	OGG1	None	None	None	purine-specific oxidized base lesion DNA N-glycosylase	Mitochondrial glycosylase/lyase that specifically excises 7,8-dihydro-8-oxoguanine residues located opposite cytosine or thymine residues in DNA, repairs oxidative damage to mitochondrial DNA	None	8-oxoguanine DNA glycosylase (by homology)	None	None	None	None	Cne_OxR-up_2.0	None	Cne_OxSR-up_2.0	None	0.262	-0.1
176.m02436	CNAG_01964	YJL212C	OPT1	SPAC29B12.10c	None	None	None	None	KOG2262	T	Sexual differentiation process protein ISP4	oligopeptide transporter	Proton-coupled oligopeptide transporter of the plasma membrane; also transports glutathione and phytochelatin; member of the OPT family	OPT oligopeptide transporter family	None	None	None	None	None	None	None	None	None	0.338	-0.02
163.m03886	CNAG_00987	YGR078C	PAC10	SPAC3H8.07c	None	orf19.5985	ca6076	PAC10	KOG3313	O	Molecular chaperone Prefoldin, subunit 3	prefoldin subunit	Part of the heteromeric co-chaperone GimC/prefoldin complex, which promotes efficient protein folding	prefoldin subunit 3 (predicted)	Non-native Actin Binding Complex Component (by homology)	None	None	None	None	None	Cne_OxR-dw_2.0	None	Cne_OxSR-dw_2.0	0.262	-0.254
177.m03203	CNAG_07718	YIR006C	PAN1	SPAC25G10.09c	None	orf19.886	ca4682	IPF3687	KOG4305	T	RhoGEF GTPase	multidomain RhoGEF	Part of actin cytoskeleton-regulatory complex Pan1p-Sla1p-End3p, associates with actin patches on the cell cortex; promotes protein-protein interactions essential for endocytosis; previously thought to be a subunit of poly(A) ribonuclease	actin cortical patch component, with EF hand and WH2 motif (predicted)	similar to Saccharomyces cerevisiae Pan1p actin-cytoskeleton assembly protein (by homology)	None	None	None	None	None	None	None	None	0.373	0.119
186.m03536	CNAG_07470	YOR360C	PDE2	None	None	orf19.2972	ca3450	PDE2	KOG3689	T	Cyclic nucleotide phosphodiesterase	high-affinity phosphodiesterase	High-affinity cyclic AMP phosphodiesterase, component of the cAMP-dependent protein kinase signaling system, protects the cell from extracellular cAMP, contains readthrough motif surrounding termination codon	None	Nucleotide phosphodiesterase	None	None	Cne_FxR-up_2.0	None	Cne_OxR-up_2.0	None	None	None	0.446	-0.121
177.m03315	CNAG_03509	YGR193C	PDX1	SPCC1259.09c	None	orf19.5021	ca5242	PDX1	KOG0557	C	Dihydrolipoamide acetyltransferase	pyruvate dehydrogenase protein X component	Dihydrolipoamide dehydrogenase (E3)-binding protein (E3BP) of the mitochondrial pyruvate dehydrogenase (PDH) complex, plays a structural role in the complex by binding and positioning E3 to the dihydrolipoamide acetyltransferase (E2) core	pyruvate dehydrogenase protein x component	Pyruvate dehydrogenase complex protein X (by homology)	None	None	None	Cne_FxR-dw_2.0	None	Cne_OxR-dw_2.0	None	None	0.067	0.214
184.m05073	CNAG_05440	YBR035C	PDX3	SPAC1093.02	None	orf19.550	ca4261	PDX3	KOG2586	H	Pyridoxamine-phosphate oxidase	pyridoxamine-phosphate oxidase	Pyridoxine (pyridoxamine) phosphate oxidase, has homologs in E. coli and Myxococcus xanthus; transcription is under the general control of nitrogen metabolism	pyridoxamine 5'-phosphate oxidase (predicted)	pyridoxamine-phosphate oxidase (by homology)	None	None	None	None	None	None	None	None	0.377	-0.151
179.m00114	CNAG_01610	YLR148W	PEP3	SPCC790.02	pep3	orf19.5584	ca2498	VPS181	KOG2034	U	Vacuolar sorting protein PEP3/VPS18	DigA protein	Component of CORVET tethering complex; vacuolar peripheral membrane protein that promotes vesicular docking/fusion reactions in conjunction with SNARE proteins, required for vacuolar biogenesis	ubiquitin-protein ligase E3 (predicted)	vacuolar membrane protein	None	None	None	None	None	None	None	None	0.358	-0.072
164.m02080	CNAG_06101	YBL030C	PET9	SPBC530.10c	anc1	orf19.930	ca5388	PET9	KOG0749	C	Mitochondrial ADP/ATP carrier proteins	eukaryotic ADP/ATP carrier	Major ADP/ATP carrier of the mitochondrial inner membrane, exchanges cytosolic ADP for mitochondrially synthesized ATP; phosphorylated; required for viability in many common lab strains carrying a mutation in the polymorphic SAL1 gene	adenine nucleotide carrier Anc1	ADP/ATP carrier protein (by homology)	None	None	None	None	None	None	None	None	0.16	-0.185
179.m00131	CNAG_01630	YNL317W	PFS2	SPAC12G12.14c	pfs2	orf19.2307	ca3310	PFS2	KOG0284	A	Polyadenylation factor I complex, subunit PFS2	polyadenylation factor subunit 2	Integral subunit of the pre-mRNA cleavage and polyadenylation factor (CPF) complex; plays an essential role in mRNA 3'-end formation by bridging different processing factors and thereby promoting the assembly of the processing complex	WD repeat protein Pfs2	Polyadenylation Factor I subunit (by homology)	None	None	None	None	None	None	None	None	0.286	-0.013
167.m03503	CNAG_02180	YNR013C	PHO91	SPBC3B8.04c	None	orf19.3663	ca0926	IPF11335	KOG1281	P	Na+/dicarboxylate, Na+/tricarboxylate and phosphate transporters	phosphate transporter	Low-affinity phosphate transporter of the vacuolar membrane; deletion of pho84, pho87, pho89, pho90, and pho91 causes synthetic lethality; transcription independent of Pi and Pho4p activity; overexpression results in vigorous growth	membrane transporter	Member of the phosphate permease family (by homology)	None	None	None	None	Cne_OxR-up_2.0	None	Cne_OxSR-up_2.0	None	0.393	-0.014
179.m00098	CNAG_01588	YDR276C	PMP3	SPBC713.11c	pmp3	orf19.2959.1	ca4174	IPF4430	KOG1773	R	Stress responsive protein	hypothetical protein	Small plasma membrane protein related to a family of plant polypeptides that are overexpressed under high salt concentration or low temperature, not essential for viability, deletion causes hyperpolarization of the plasma membrane potential	plasma membrane proteolipid Pmp3	unknown function	None	None	None	None	None	None	None	None	0.297	-0.295
179.m00150	CNAG_01652	YPL096W	PNG1	SPBC1709.14	None	orf19.26	ca3609	IPF3856	KOG0909	O	Peptide:N-glycanase	peptide-N4-(N-acetyl-beta-glucosaminyl)asparagine amidase	Conserved peptide N-glycanase required for deglycosylation of misfolded glycoproteins during proteasome-dependent degradation, localizes to the cytoplasm and nucleus, interacts with the DNA repair protein Rad23p	peptide N-glycanase (predicted)	similar to Saccharomyces cerevisiae Png1P peptide:N-glycanase (by homology)	None	None	None	None	Cne_OxR-up_2.0	None	Cne_OxSR-up_2.0	None	0.346	-0.042
179.m00579	CNAG_01510	YMR129W	POM152	SPBC29A10.07	None	orf19.2081	ca4817	POM152	None	None	None	conserved hypothetical protein	Nuclear pore membrane glycoprotein; may be involved in duplication of nuclear pores and nuclear pore complexes during S-phase;	nucleoporin Pom152	Nuclear pore membrane glycoprotein (by homology)	None	None	None	None	None	None	None	None	0.349	-0.004
183.m01716	CNAG_06425	YLR014C	PPR1	None	None	orf19.3986	ca4758	PPR1	None	None	None	fungal specific transcription factor	Zinc finger transcription factor containing a Zn(2)-Cys(6) binuclear cluster domain, positively regulates transcription of genes involved in uracil biosynthesis; activity may be modulated by interaction with Tup1p	None	transcription factor regulating pyrimidine pathway (by homology)	None	None	None	None	None	None	None	None	0.31	0.581
186.m03741	CNAG_03816	YJL001W	PRE3	SPBC4C3.10c	None	orf19.6991	ca5037	PRE3	KOG0174	O	20S proteasome, regulatory subunit beta type PSMB6/PSMB9/PRE3	proteasome subunit beta type 6	Beta 1 subunit of the 20S proteasome, responsible for cleavage after acidic residues in peptides	20S proteasome component beta 1	20S proteasome subunit (beta1)(by homology)	None	None	None	None	None	None	None	None	0.336	0.081
176.m02429	CNAG_01957	YFR050C	PRE4	SPBC577.10	None	orf19.4230	ca4142	PRE4	KOG0185	O	20S proteasome, regulatory subunit beta type PSMB4/PRE4	endopeptidase	Beta 7 subunit of the 20S proteasome	20S proteasome component beta 7	20S proteasome subunit(beta7) (by homology)	None	None	None	None	None	None	None	None	0.281	-0.091
163.m06279	CNAG_01174	YJL108C	PRM10	SPAC7D4.12c	None	orf19.6527	ca4951	IPF13607	None	None	None	DUF1212 family protein	Pheromone-regulated protein, predicted to have 5 transmembrane segments; induced by treatment with 8-methoxypsoralen and UVA irradiation	DUF1212 family protein	unknown function	Cne_OsR-up_2.0	None	Cne_FxR-up_2.0	None	Cne_OxR-up_2.0	None	Cne_CSR-up_2.0	None	0.374	0.041
184.m04376	CNAG_05386	YDR300C	PRO1	SPAC17H9.13c	None	orf19.7638	ca6031	PRO1	KOG1154	E	Gamma-glutamyl kinase	glutamate 5-kinase	Gamma-glutamyl kinase, catalyzes the first step in proline biosynthesis	glutamate 5-kinase (predicted)	glutamate 5-kinase (by homology)	None	None	None	None	Cne_OxR-up_2.0	None	Cne_OxSR-up_2.0	None	-0.071	0.517
163.m06159	CNAG_01103	YDL043C	PRP11	SPBC21C3.05	sap62	orf19.4724	ca1604	IPF13653	KOG0227	A	Splicing factor 3a, subunit 2	zinc finger protein Sap62	Subunit of the SF3a splicing factor complex, required for spliceosome assembly	zinc finger protein Sap62	unknown function	None	None	None	None	None	None	None	None	0.181	-0.248
179.m00271	CNAG_01813	YDL055C	PSA1	SPCC1906.01	mpg1	orf19.6190	ca3208	PSA1	KOG1322	M	GDP-mannose pyrophosphorylase/mannose-1-phosphate guanylyltransferase	mannose-1-phosphate guanylyltransferase	GDP-mannose pyrophosphorylase (mannose-1-phosphate guanyltransferase), synthesizes GDP-mannose from GTP and mannose-1-phosphate in cell wall biosynthesis; required for normal cell wall structure	mannose-1-phosphate guanyltransferase Mpg1	GDP-mannose pyrophosphorylase	None	None	None	Cne_FxR-dw_2.0	None	None	None	Cne_FxSR-dw_2.0	0.343	0.081
180.m00339	CNAG_05787	YAL043C	PTA1	SPAC1071.01c	pta1	orf19.7041	ca5222	IPF3079	KOG1895	A	mRNA cleavage and polyadenylation factor II complex, subunit PTA1	cleavage/polyadenylation specificity factor	Subunit of holo-CPF, a multiprotein complex and functional homolog of mammalian CPSF, required for the cleavage and polyadenylation of mRNA and snoRNA 3' ends; involved in pre-tRNA processing; binds to the phosphorylated CTD of RNAPII	mRNA cleavage and polyadenylation specificity factor complex subunit Pta1	similar to Saccharomyces cerevisiae Pta1p pre-tRNA processing protein (by homology)	None	None	None	None	None	None	None	None	0.454	0.052
183.m01709	CNAG_06418	YCR079W	PTC6	SPAC4A8.03c	ptc4	orf19.3705	ca0941	IPF8617	KOG0698	T	Serine/threonine protein phosphatase	PP2Cc protein phosphatase	Mitochondrial type 2C protein phosphatase involved in regulation of pyruvate dehydrogenase activity by dephosphorylating the ser-133 residue of the Pda1p subunit; acts in concert with kinases Pkp1p and Pkp2p and phosphatase Ptc5p	protein phosphatase 2C Ptc4	unknown function	None	None	None	None	None	None	None	None	-0.13	0.382
163.m06329	CNAG_01413	YNL016W	PUB1	SPBC23E6.01c	None	orf19.7368	ca5666	PUB1	KOG0118	R	FOG: RRM domain	nuclear and cytoplasmic polyadenylated RNA-binding protein pub1	Poly(A)+ RNA-binding protein, abundant mRNP-component protein that binds mRNA and is required for stability of a number of mRNAs; not reported to associate with polyribosomes	RNA-binding protein, rrm type	Major polyadenylated RNA-binding protein (by homology)	None	None	None	None	None	None	None	None	0.263	-0.061
179.m00694	CNAG_02810	YGL014W	PUF4	SPAC6G9.14	None	orf19.5381	ca2299	IPF8222	None	None	None	pumilio-family RNA binding protein	Member of the PUF protein family, which is defined by the presence of Pumilio homology domains that confer RNA binding activity; preferentially binds mRNAs encoding nucleolar ribosomal RNA-processing factors	RNA-binding protein	unknown function	Cne_OsR-up_2.0	None	None	None	None	Cne_OxR-dw_2.0	Cne_OsSR-up_2.0	Cne_OxSR-dw_2.0	0.314	-0.046
163.m06504	CNAG_01323	YDR529C	QCR7	SPCC737.02c	qcr7	orf19.5629	ca2764	QCR7	KOG3440	C	Ubiquinol cytochrome c reductase, subunit QCR7	ubiquinol-cytochrome-c reductase	Subunit 7 of the ubiquinol cytochrome-c reductase complex, which is a component of the mitochondrial inner membrane electron transport chain; oriented facing the mitochondrial matrix; N-terminus appears to play a role in complex assembly	ubiquinol-cytochrome-c reductase complex subunit 6	ubiquinol--cytochrome-c reductase subunit 7 (by homology)	None	None	None	None	None	Cne_OxR-dw_2.0	None	Cne_OxSR-dw_2.0	0.191	-0.152
177.m03198	CNAG_03215	YIL121W	QDR2	None	None	None	None	None	KOG0255	R	Synaptic vesicle transporter SVOP and related transporters (major facilitator superfamily)	Aqr1p	Multidrug transporter of the major facilitator superfamily, required for resistance to quinidine, barban, cisplatin, and bleomycin; may have a role in potassium uptake	None	None	None	Cne_OsR-dw_2.0	None	None	None	None	None	Cne_OsSR-dw_2.0	0.277	-0.094
176.m02388	CNAG_01912	YHR074W	QNS1	SPCC553.02	None	orf19.1460	ca4542	IPF6255	KOG2303	HR	Predicted NAD synthase, contains CN hydrolase domain	glutamine-dependent NAD(+) synthetase synthase	Glutamine-dependent NAD(+) synthetase, essential for the formation of NAD(+) from nicotinic acid adenine dinucleotide	glutamine-dependent NAD(+) synthetase (predicted)	unknown function	None	None	None	None	None	Cne_OxR-dw_2.0	None	Cne_OxSR-dw_2.0	0.276	-0.076
177.m02988	CNAG_03449	YMR201C	RAD14	SPBC649.03	rhp14	orf19.6517	ca4958	RAD14	KOG4017	L	DNA excision repair protein XPA/XPAC/RAD14	hydrophilic protein	Protein that recognizes and binds damaged DNA during nucleotide excision repair; subunit of Nucleotide Excision Repair Factor 1 (NEF1); contains zinc finger motif; homolog of human XPA protein	XP-A family homolog Rhp14	nucleotide excision repair protein (by homology)	None	None	None	None	None	None	None	None	0.291	-0.068
177.m03088	CNAG_03332	YOL094C	RFC4	SPAC1687.03c	rfc4	orf19.7658	ca6043	RFC4	KOG0991	L	Replication factor C, subunit RFC2	activator 1 40 kDa subunit	Subunit of heteropentameric Replication factor C (RF-C), which is a DNA binding protein and ATPase that acts as a clamp loader of the proliferating cell nuclear antigen (PCNA) processivity factor for DNA polymerases delta and epsilon	DNA replication factor C complex subunit Rfc4 (predicted)	DNA replication factor C (by homology)	None	None	None	None	None	Cne_OxR-dw_2.0	None	Cne_OxSR-dw_2.0	0.28	-0.175
177.m03471	CNAG_03315	YPR165W	RHO1	SPAC1F7.04	rho1	orf19.2843	ca2866	RHO1	KOG0393	R	Ras-related small GTPase, Rho type	Rho1 GTP-binding protein	GTP-binding protein of the rho subfamily of Ras-like proteins, involved in establishment of cell polarity; regulates protein kinase C (Pkc1p) and the cell wall synthesizing enzyme 1,3-beta-glucan synthase (Fks1p and Gsc2p)	Rho family GTPase Rho1	GTP-binding protein of the rho subfamily of ras-like proteins (by homology)	None	None	None	None	None	None	None	None	0.149	-0.172
163.m06251	CNAG_01187	YKR081C	RPF2	SPAC926.08c	None	orf19.3553	ca2662	IPF17139	KOG3031	J	Protein required for biogenesis of the ribosomal 60S subunit	ribosome biogenesis protein RPF2	Essential protein involved in the processing of pre-rRNA and the assembly of the 60S ribosomal subunit; interacts with ribosomal protein L11; localizes predominantly to the nucleolus; constituent of 66S pre-ribosomal particles	Brix domain protein Rpf2 (predicted)	unknown function	Cne_OsR-up_2.0	None	None	None	None	None	Cne_OsSR-up_2.0	None	0.419	0.104
164.m02071	CNAG_06095	YMR142C	RPL13B	SPAC664.05	rpl13	orf19.2994	ca2818	RPL13	KOG3295	J	60S Ribosomal protein L13	ribosomal protein L13	Protein component of the large (60S) ribosomal subunit, nearly identical to Rpl13Ap; not essential for viability; has similarity to rat L13 ribosomal protein	60S ribosomal protein L13	Ribosomal protein	None	None	None	None	None	Cne_OxR-dw_2.0	None	Cne_OxSR-dw_2.0	0.036	-0.315
167.m05882	CNAG_02234	YLR448W	RPL6B	SPCC622.18	rpl6	orf19.3003.1	ca3123	RPL6	KOG1694	J	60s ribosomal protein L6	60S ribosomal protein L6	Protein component of the large (60S) ribosomal subunit, has similarity to Rpl6Ap and to rat L6 ribosomal protein; binds to 5.8S rRNA	60S ribosomal protein L6	ribosomal protein	None	None	None	None	None	Cne_OxR-dw_2.0	None	Cne_OxSR-dw_2.0	-0.019	-0.418
181.m08397	CNAG_00672	YDR025W	RPS11A	SPAC31G5.03	rps1101	orf19.4149.1	None	None	KOG1728	J	40S ribosomal protein S11	ribosomal protein S11	Protein component of the small (40S) ribosomal subunit; identical to Rps11Bp and has similarity to E. coli S17 and rat S11 ribosomal proteins	40S ribosomal protein S11	None	None	None	None	None	None	Cne_OxR-dw_2.0	None	Cne_OxSR-dw_2.0	0.012	-0.178
163.m06202	CNAG_01152	YPL090C	RPS6A	SPAPB1E7.12	rps602	orf19.4660	ca2708	RPS6A	KOG1646	J	40S ribosomal protein S6	40s ribosomal protein s6-b	Protein component of the small (40S) ribosomal subunit; identical to Rps6Bp and has similarity to rat S6 ribosomal protein	40S ribosomal protein S6	ribosomal protein S6 (by homology)	None	None	None	None	None	Cne_OxR-dw_2.0	None	Cne_OxSR-dw_2.0	-0.022	-0.237
162.m02987	CNAG_04377	YOL138C	RTC1	SPAC4F8.11	None	None	None	None	KOG0269	S	WD40 repeat-containing protein	vacuolar protein	Putative protein of unknown function; may interact with ribosomes, based on co-purification experiments; null mutation suppresses cdc13-1 temperature sensitivity	WD repeat protein, human WDR24 family	None	None	None	None	None	Cne_OxR-up_2.0	None	Cne_OxSR-up_2.0	None	-0.011	0.96
181.m08752	CNAG_00361	YDR388W	RVS167	SPBC21D10.12	hob1	orf19.1220	ca1531	RVS167	KOG3771	U	Amphiphysin	Hob1p	Actin-associated protein, subunit of a complex (Rvs161p-Rvs167p) involved in regulation of actin cytoskeleton, endocytosis, and viability following starvation or osmotic stress; homolog of mammalian amphiphysin	BAR adaptor protein Hob1	(putative) cytoskeletal protein (by homology)	None	None	None	None	None	None	None	None	0.451	0.06
164.m02064	CNAG_06080	YKL212W	SAC1	SPBC19F5.03	None	orf19.4865	ca4722	SAC1	KOG1889	I	Putative phosphoinositide phosphatase	inositol/phosphatidylinositol phosphatase	Phosphatidylinositol (PI) phosphatase, involved in hydrolysis of PI 3-phosphate, PI 4-phosphate and PI 3,5-bisphosphate to PI; membrane protein localizes to ER and Golgi; involved in protein trafficking, secretion and inositol metabolism	inositol polyphosphate phosphatase (predicted)	integral membrane protein localizing to the ER and Golgi (by homology)	None	None	None	None	None	None	None	None	0.216	-0.097
162.m04531	CNAG_04410	YGR263C	SAY1	None	None	orf19.3924	ca2233	IFJ3	KOG1515	V	Arylacetamide deacetylase	endoplasmic reticulum protein	Sterol deacetylase; component of the sterol acetylation/deacetylation cycle along with Atf2p; integral membrane protein with active site in the ER lumen; green fluorescent protein (GFP)-fusion protein localizes to the endoplasmic reticulum	None	unknown function	None	None	None	None	None	None	None	None	0.349	-0.103
177.m03188	CNAG_03226	YLL041C	SDH2	SPAC140.01	sdh2	orf19.637	ca1845	IPF11123	KOG3049	C	Succinate dehydrogenase, Fe-S protein subunit	succinate dehydrogenase iron-sulfur subunit	Iron-sulfur protein subunit of succinate dehydrogenase (Sdh1p, Sdh2p, Sdh3p, Sdh4p), which couples the oxidation of succinate to the transfer of electrons to ubiquinone	succinate dehydrogenase (ubiquinone) iron-sulfur protein subunit	similar to Saccharomyces cerevisiae Sdh2p succinate dehydrogenase iron-sulfur protein subunit (by homology)	None	Cne_OsR-dw_2.0	None	Cne_FxR-dw_2.0	None	Cne_OxR-dw_2.0	None	Cne_CSR-dw_2.0	0.061	-0.493
181.m08003	CNAG_00253	YGL233W	SEC15	SPCC1183.01	sec15	orf19.1418	ca3959	IPF11236.3f	KOG2176	U	Exocyst complex, subunit SEC15	rsec15	Essential 113kDa subunit of the exocyst complex (Sec3p, Sec5p, Sec6p, Sec8p, Sec10p, Sec15p, Exo70p, and Exo84p), which mediates polarized targeting of vesicles to active sites of exocytosis; Sec15p associates with Sec4p and vesicles	exocyst complex subunit Sec15 (predicted)	similar to Saccharomyces cerevisiae Sec15p component of the exocyst complex, 3-prime end (by homology)	None	None	None	None	None	None	None	None	0.399	-0.214
180.m00202	CNAG_06591	YKR029C	SET3	SPAC22E12.11c	set3	orf19.7221	ca5346	IPF867	KOG1844	R	PHD Zn-finger proteins	conserved hypothetical protein	Defining member of the SET3 histone deacetylase complex which is a meiosis-specific repressor of sporulation genes; necessary for efficient transcription by RNAPII; one of two yeast proteins that contains both SET and PHD domains	histone lysine methyltransferase Set3	unknown function	None	None	None	None	None	None	None	None	0.349	0.015
163.m03819	CNAG_00909	YKR072C	SIS2	None	None	None	None	None	KOG0672	PD	Halotolerance protein HAL3 (contains flavoprotein domain)	HAL3B protein	Negative regulatory subunit of the protein phosphatase 1 Ppz1p; involved in ion homeostasis and cell cycle progression	None	None	None	None	None	None	None	None	None	None	0.339	-0.027
180.m00110	CNAG_05734	YBL007C	SLA1	SPAC16E8.01	None	orf19.1474	ca4531	SLA1	None	None	None	conserved hypothetical protein	Cytoskeletal protein binding protein required for assembly of the cortical actin cytoskeleton; interacts with proteins regulating actin dynamics and proteins required for endocytosis; found in the nucleus and cell cortex; has 3 SH3 domains	cytoskeletal protein binding protein Sla1 family (predicted)	cytoskeleton assembly control protein	None	None	None	None	None	None	None	None	0.12	-0.297
176.m02568	CNAG_01988	YIL147C	SLN1	None	None	None	None	None	KOG0519	T	Sensory transduction histidine kinase	bacteriophytochrome histidine kinase	Histidine kinase osmosensor that regulates a MAP kinase cascade; transmembrane protein with an intracellular kinase domain that signals to Ypd1p and Ssk1p, thereby forming a phosphorelay system similar to bacterial two-component regulators	None	None	None	None	None	None	None	None	None	None	0.255	-0.178
179.m00093	CNAG_01583	YLR025W	SNF7	SPAC1142.07c	vps32	orf19.6040	ca4903	SNF7	KOG1656	U	Protein involved in glucose derepression and pre-vacuolar endosome protein sorting	vacuolar-sorting protein SNF7	One of four subunits of the endosomal sorting complex required for transport III (ESCRT-III); involved in the sorting of transmembrane proteins into the multivesicular body (MVB) pathway; recruited from the cytoplasm to endosomal membranes	vacuolar sorting protein Vps32	Class E Vps protein (by homology)	None	None	None	None	None	None	None	None	0.276	-0.151
163.m03860	CNAG_01019	YJR104C	SOD1	SPAC821.10c	sod1	orf19.2770.1	ca4120	SOD1	KOG0441	P	Cu2+/Zn2+ superoxide dismutase SOD1	Cu/Zn superoxide dismutase	Cytosolic superoxide dismutase; some mutations are analogous to those that cause ALS (amyotrophic lateral sclerosis) in humans	superoxide dismutase Sod1	Cu,Zn-superoxide dismutase	None	None	None	None	None	None	None	None	-0.94	0.309
162.m02726	CNAG_04388	YHR008C	SOD2	SPAC1486.01	None	orf19.7111.1	None	None	KOG0876	P	Manganese superoxide dismutase	mitochondrial superoxide dismutase Sod2	Mitochondrial superoxide dismutase, protects cells against oxygen toxicity; phosphorylated	manganese superoxide dismutase (AF069292)	None	None	None	None	None	None	None	None	None	0.842	-0.106
181.m07801	CNAG_00021	YOL052C	SPE2	SPBP4H10.05c	spe2	orf19.568	ca2712	SPE2	KOG0788	T	S-adenosylmethionine decarboxylase	adenosylmethionine decarboxylase	S-adenosylmethionine decarboxylase, required for the biosynthesis of spermidine and spermine; cells lacking Spe2p require spermine or spermidine for growth in the presence of oxygen but not when grown anaerobically	S-adenosylmethionine decarboxylase proenzyme Spe2	adenosylmethionine decarboxylase precurser(by homology)	Cne_OsR-up_2.0	None	None	None	None	None	Cne_OsSR-up_2.0	None	0.239	-0.221
179.m00273	CNAG_01817	YDR292C	SRP101	SPBC3B9.03	None	orf19.3952	ca1011	SRP101	KOG0781	U	Signal recognition particle receptor, alpha subunit	signal recognition particle binding protein	Signal recognition particle (SRP) receptor - alpha subunit; contain GTPase domains; involved in SRP-dependent protein targeting; interacts with SRP102p	signal recognition particle receptor alpha subunit Srp101	signal recognition particle receptor, alpha chain (by homology)	None	None	None	None	None	None	None	None	0.264	-0.195
180.m00430	CNAG_06639	YIL030C	SSM4	SPBC14F5.07	None	orf19.5175	ca4420	SSM4	KOG1609	A	Protein involved in mRNA turnover and stability	conserved hypothetical protein	Ubiquitin-protein ligase of the ER/nuclear envelope, required for degradation of Alpha2p and other proteins containing a Deg1 degradation signal; ssm4 mutation suppresses mRNA instability caused by an rna14 mutation	ER-localized ubiquitin ligase (predicted)	involved in mRNA turnover by homology	None	None	None	None	None	None	None	None	0.281	0.022
180.m00008	CNAG_05970	YHL007C	STE20	SPBC1604.14c	shk1	orf19.4242	ca4132	STE20	KOG0578	T	p21-activated serine/threonine protein kinase	STE/STE20/PAKA protein kinase	Signal transducing kinase of the PAK (p21-activated kinase) family, involved in pheromone response and pseudohyphal/invasive growth pathways, activated by Cdc42p; binds Ste4p at a GBB motif present in noncatalytic domains of PAK kinases	PAK-related kinase Shk1	serine/threonine-specific protein kinase	None	None	None	None	None	None	None	None	0.404	0.097
177.m03399	CNAG_03368	YLR045C	STU2	SPCC895.07	alp14	orf19.6610	ca3849	IPF7938	KOG1820	Z	Microtubule-associated protein	microtubule Associated protein	Microtubule-associated protein (MAP) of the XMAP215/Dis1 family; regulates microtubule dynamics during spindle orientation and metaphase chromosome alignment; interacts with spindle pole body component Spc72p	Mad2-dependent spindle checkpoint component	similar to Saccharomyces cerevisiae Stu2p suppressor of cold-sensitive tubulin mutation (by homology)	None	None	None	None	None	None	None	None	0.5	0.106
176.m02143	CNAG_06924	YIL162W	SUC2	SPAC8E11.01c	None	None	None	None	KOG0228	G	Beta-fructofuranosidase (invertase)	beta-fructofuranosidase	Invertase, sucrose hydrolyzing enzyme; a secreted, glycosylated form is regulated by glucose repression, and an intracellular, nonglycosylated enzyme is produced constitutively	beta-fructofuranosidase-like protein	None	None	None	None	None	None	None	None	None	0.376	0.058
163.m06413	CNAG_06838	YPL029W	SUV3	SPAC637.11	suv3	orf19.4519	ca2908	SUV3	KOG0953	A	Mitochondrial RNA helicase SUV3, DEAD-box superfamily	mitochondrial RNA helicase	ATP-dependent RNA helicase, component of the mitochondrial degradosome along with the RNase Dss1p; the degradosome associates with the ribosome and mediates turnover of aberrant or unprocessed RNAs	mitochondrial ATP-dependent RNA helicase Suv3 (predicted)	ATP-dependent RNA helicase, mitochondrial (by homology)	None	None	None	None	None	None	None	None	0.371	-0.188
181.m08759	CNAG_00356	YDR346C	SVF1	SPCC584.11c	None	orf19.6068	ca4928	IPF1399	None	None	None	survival factor 1	Protein with a potential role in cell survival pathways, required for the diauxic growth shift; expression in mammalian cells increases survival under conditions inducing apoptosis	Svf1 family protein Svf1	unknown function	None	None	None	None	None	None	None	None	0.326	0.006
167.m03648	CNAG_02020	YGR002C	SWC4	SPAC9G1.13c	None	orf19.7492	ca5838	IPF424	KOG2656	BK	DNA methyltransferase 1-associated protein-1	SWR1-complex protein 4	Component of the Swr1p complex that incorporates Htz1p into chromatin; component of the NuA4 histone acetyltransferase complex	histone acetyltransferase complex subunit Swc4 (predicted)	unknown function	None	None	None	None	None	None	None	None	0.396	-0.016
162.m03041	CNAG_04172	YDR362C	TFC6	SPBC21H7.05	sfc6	None	None	None	None	None	None	conserved hypothetical protein	One of six subunits of RNA polymerase III transcription initiation factor complex (TFIIIC); part of TFIIIC TauB domain that binds BoxB promoter sites of tRNA and other genes; cooperates with Tfc3p in DNA binding; human homolog is TFIIIC-110	transcription factor TFIIIC complex subunit Sfc6	None	None	None	None	None	None	None	None	None	0.268	-0.077
179.m00658	CNAG_01632	YDR058C	TGL2	None	None	orf19.3043	ca5070	IPF3594	None	None	None	triacylglycerol lipase	Protein with lipolytic activity towards triacylglycerols and diacylglycerols when expressed in E. coli; role in yeast lipid degradation is unclear	None	triglyceride lipase (by homology)	None	Cne_OsR-dw_2.0	None	None	None	None	None	Cne_OsSR-dw_2.0	0.207	-0.076
167.m03404	CNAG_07635	YIL144W	TID3	SPBC11C11.03	ndc80	orf19.2827	ca0770	IPF10963	KOG0995	D	Centromere-associated protein HEC1	conserved hypothetical protein	Component of the evolutionarily conserved kinetochore-associated Ndc80 complex (Ndc80p-Nuf2p-Spc24p-Spc25p); conserved coiled-coil protein involved in chromosome segregation, spindle checkpoint activity, kinetochore assembly and clustering	spindle pole body protein Ndc80	unknown	None	None	None	None	None	None	None	None	0.308	-0.088
164.m02165	CNAG_07914	YAL016W	TPD3	SPAP8A3.09c	paa1	orf19.6810	ca5896	TPD3	KOG0211	T	Protein phosphatase 2A regulatory subunit A and related proteins	PDF2	Regulatory subunit A of the heterotrimeric protein phosphatase 2A, which also contains regulatory subunit Cdc55p and either catalytic subunit Pph21p or Pph22p; required for cell morphogenesis and for transcription by RNA polymerase III	protein phosphatase regulatory subunit Paa1	Ser/thr protein phosphatase (by homology)	None	None	None	None	None	None	None	None	0.256	-0.203
181.m08530	CNAG_00811	YDR354W	TRP4	SPBC16G5.08	trp4	orf19.3099	ca4410	TRP4	KOG1438	E	Anthranilate phosphoribosyltransferase	anthranilate phosphoribosyltransferase	Anthranilate phosphoribosyl transferase of the tryptophan biosynthetic pathway, catalyzes the phosphoribosylation of anthranilate, subject to the general control system of amino acid biosynthesis	phosphoribosylanthranilate transferase Trp4	Anthranilate phosphoribosyltransferase	None	None	None	None	None	None	None	None	0.288	-0.281
181.m08380	CNAG_00649	YGL026C	TRP5	SPAC19A8.15	trp2	orf19.4718	ca1580	TRP5	KOG1395	E	Tryptophan synthase beta chain	tryptophan synthase	Tryptophan synthase involved in tryptophan biosynthesis, regulated by the general control system of amino acid biosynthesis	tryptophan synthase (predicted)	tryptophan synthase (by homology)	None	None	None	None	Cne_OxR-up_2.0	None	Cne_OxSR-up_2.0	None	0.331	-0.013
180.m00066	CNAG_05847	YDR353W	TRR1	SPBC3F6.03	trr1	orf19.4290	ca3059	TRR1	KOG0404	O	Thioredoxin reductase	thioredoxin-disulfide reductase	Cytoplasmic thioredoxin reductase, key regulatory enzyme that determines the redox state of the thioredoxin system, which acts as a disulfide reductase system and protects cells against both oxidative and reductive stress	thioredoxin reductase Trr1	Thioredoxin reductase (by homology)	None	None	None	None	Cne_OxR-up_2.0	None	Cne_OxSR-up_2.0	None	0.263	-0.164
176.m02396	CNAG_01920	YLL039C	UBI4	SPBC337.08c	ubi4	orf19.6771	ca5932	UBI4	KOG0001	OR	Ubiquitin and ubiquitin-like proteins	polyubiquitin	Ubiquitin, becomes conjugated to proteins, marking them for selective degradation via the ubiquitin-26S proteasome system; essential for the cellular stress response; encoded as a polyubiquitin precursor comprised of 5 head-to-tail repeats	ubiquitin	Polyubiquitin	None	None	None	None	Cne_OxR-up_2.0	None	Cne_OxSR-up_2.0	None	0.17	-0.292
180.m00122	CNAG_05708	YBR058C	UBP14	SPBC6B1.06c	ubp14	orf19.1516	ca1752	UBP14	KOG0944	O	Ubiquitin-specific protease UBP14	ubiquitin carboxyl-terminal hydrolase 14	Ubiquitin-specific protease that specifically disassembles unanchored ubiquitin chains; involved in fructose-1,6-bisphosphatase (Fbp1p) degradation; similar to human isopeptidase T	ubiquitin C-terminal hydrolase Ubp14	Ubiquitin-specific protease (by homology)	None	None	None	None	None	None	None	None	0.295	-0.048
181.m08000	CNAG_00248	YLR417W	VPS36	SPBC3B9.09	vps36	orf19.795	ca1469	IPF5078	KOG2760	U	Vacuolar sorting protein VPS36	conserved hypothetical protein	Component of the ESCRT-II complex; contains the GLUE (GRAM Like Ubiquitin binding in EAP45) domain which is involved in interactions with ESCRT-I and ubiquitin-dependent sorting of proteins into the endosome	RBZ zinc finger protein Vps36	unknown function	None	None	None	None	None	None	None	None	0.269	-0.22
185.m02388	CNAG_04604	YOL097C	WRS1	SPAC2F7.13c	None	orf19.5226	ca1973	WRS1	KOG2145	J	Cytoplasmic tryptophanyl-tRNA synthetase	tryptophan-tRNA ligase	Cytoplasmic tryptophanyl-tRNA synthetase, aminoacylates tryptophanyl-tRNA	tryptophan-tRNA ligase (predicted)	tryptophan--tRNA ligase	None	None	None	None	None	None	None	None	0.303	0.008
176.m02431	CNAG_01959	YLR272C	YCS4	SPBC776.13	cnd1	orf19.1883	ca4482	IPF9154	KOG0414	BD	Chromosome condensation complex Condensin, subunit D2	condensin	Non-SMC subunit of the condensin complex (Smc2p-Smc4p-Ycs4p-Brn1p-Ycg1p); required for establishment and maintenance of chromosome condensation, chromosome segregation, chromatin binding of condensin and silencing at the mating type locus	condensin subunit Cnd1	similar to Saccharomyces cerevisiae Ycs4p subunit of condensin protein complex (by homology)	None	None	None	None	None	None	None	None	0.391	-0.02
181.m08327	CNAG_00594	YLR020C	YEH2	SPBC16A3.12c	None	orf19.1887	ca4480	IPF6464	KOG2624	I	Triglyceride lipase-cholesterol esterase	lipid particle protein	Steryl ester hydrolase, catalyzes steryl ester hydrolysis at the plasma membrane; involved in sterol metabolism	triglyceride lipase-cholesterol esterase (predicted)	putative triacylglycerol lipase (by homology)	None	None	None	None	Cne_OxR-up_2.0	None	Cne_OxSR-up_2.0	None	0.391	-0.163
162.m04563	CNAG_04220	YMR284W	YKU70	SPCC126.02c	pku70	orf19.1135	None	None	KOG2327	L	DNA-binding subunit of a DNA-dependent protein kinase (Ku70 autoantigen)	Ku70 protein	Subunit of the telomeric Ku complex (Yku70p-Yku80p), involved in telomere length maintenance, structure and telomere position effect; relocates to sites of double-strand cleavage to promote nonhomologous end joining during DSB repair	Ku domain protein Pku70	None	None	None	None	None	Cne_OxR-up_2.0	None	Cne_OxSR-up_2.0	None	0.398	0.032
177.m03163	CNAG_03249	YDR381W	YRA1	SPBC1D7.04	mlo3	orf19.5917.3	None	None	KOG0533	A	RRM motif-containing protein	conserved hypothetical protein	Nuclear protein that binds to RNA and to Mex67p, required for export of poly(A)+ mRNA from the nucleus; member of the REF (RNA and export factor binding proteins) family; another family member, Yra2p, can substitute for Yra1p function	RNA annealing factor Mlo3	None	None	None	None	None	None	None	None	None	0.263	-0.093
186.m03525	CNAG_03604	YPR107C	YTH1	SPAC227.08c	yth1	orf19.6881	ca4569	IPF9552	KOG1040	A	Polyadenylation factor I complex, subunit, Yth1 (CPSF subunit)	no arches protein	Essential RNA-binding component of cleavage and polyadenylation factor, contains five zinc fingers; required for pre-mRNA 3'-end processing and polyadenylation	zinc finger protein Yth1	unknown function	None	None	None	None	None	None	None	None	0.514	0.084

## Sheet: H99 BCS Cu zero-transform
Gene ID/ name									Biological function							Stress Response Genes of S. cerevisiae								Stress Response Genes of S. pombe								Stress Response Genes of C. albicans (Enjalbert et al., 2003)								Stress Response Genes of C. albicans (Enjalbert et al., 2006)
C.neo (JEC21) ID	C.neo (H99) ID	Sce ID	Sce_Gene (SGD)	Spo ID	Spo_Gene (GeneDB)	Cal ID (SGTC)	Cal ID (CYGD)	Cal_Gene (CandiaDB)	KOGs ID	KOGs Catagory	KOGs Description	Cn.H99.v2 Description	Sce_Description (SGD)	Spo_Description (GeneDB)	Cal_Description (CandiaDB)	Sce_OS-up_2.0 (Gasch-00)	Sce_OS-dw_2.0 (Gasch-00)	Sce_XS-up_2.0 (Gasch-00)	Sce_XS-dw_2.0 (Gasch-00)	Sce_HS-up_2.0 (Gasch-00)	Sce_HS-dw_2.0 (Gasch-00)	Sce_SSR-up_2.0 (Gasch-00, Re-exam)	Sce_SSR-dw_2.0 (Gasch-00, Re-exam)	Spo_OS-up_2.0 (Chen-03)	Spo_OS-dw_2.0 (Chen-03)	Spo_XS-up_2.0 (Chen-03)	Spo_XS-dw_2.0 (Chen-03)	Spo_Cd-up_2.0 (Chen-03)	Spo_Cd-dw_2.0 (Chen-03)	Spo_SSR-up_2.0 (Chen-03)	Spo_SSR-dw_2.0 (Chen-03)	Cal_OS-up (Enjalbert-03)	Cal_OS-dw (Enjalbert-03)	Cal_XS-up (Enjalbert-03)	Cal_XS-dw (Enjalbert-03)	Cal_HS-up (Enjalbert-03)	Cal_HS-dw (Enjalbert-03)	Cal_SSR-up (Enjalbert-03)	Cal_SSR-dw (Enjalbert-03)	Cal_OS-up_1.5 (Enjalbert-06)	Cal_OS-dw_1.5 (Enjalbert-06)	Cal_OS-up_2.0 (Enjalbert-06)	Cal_OS-dw_2.0 (Enjalbert-06)	Cal_XS-up_1.5 (Enjalbert-06)	Cal_XS-dw_1.5 (Enjalbert-06)	Cal_XS-up_2.0 (Enjalbert-06)	Cal_XS-dw_2.0 (Enjalbert-06)	Cal_Cd-up_1.5 (Enjalbert-06)	Cal_Cd-dw_1.5 (Enjalbert-06)
162.m02222	CNAG_04193	None	None	None	None	None	None	None	None	None	None	conserved hypothetical protein	None	None	None	None	None	None	None	None	None	None	None	None	None	None	None	None	None	None	None	None	None	None	None	None	None	None	None	None	None	None	None	None	None	None	None	None	None
162.m02324	CNAG_04311	None	None	SPBC1604.18c	None	None	None	None	KOG2911	S	Uncharacterized conserved protein	conserved hypothetical protein	None	vacuolar sorting protein (predicted)	None	None	None	None	None	None	None	None	None	None	None	None	None	None	None	None	None	None	None	None	None	None	None	None	None	None	None	None	None	None	None	None	None	None	None
162.m02345	CNAG_04330	None	None	None	None	None	None	None	KOG0781	U	Signal recognition particle receptor, alpha subunit	conserved hypothetical protein	None	None	None	None	None	None	None	None	None	None	None	None	None	None	None	None	None	None	None	None	None	None	None	None	None	None	None	None	None	None	None	None	None	None	None	None	None
162.m02596	None	None	None	None	None	None	None	None	None	None	None	None	None	None	None	None	None	None	None	None	None	None	None	None	None	None	None	None	None	None	None	None	None	None	None	None	None	None	None	None	None	None	None	None	None	None	None	None	None
162.m02620	CNAG_07780	YPL069C	BTS1	None	None	orf19.6674	ca4277	BTS1	None	None	None	farnesyltranstransferase	Geranylgeranyl diphosphate synthase, increases the intracellular pool of geranylgeranyl diphosphate, suppressor of bet2 mutation that causes defective geranylgeranylation of small GTP-binding proteins that mediate vesicular traffic	None	Geranylgeranyl diphosphate synthase (by homology)	None	None	None	None	None	None	None	None	None	None	None	None	None	None	None	None	None	Cal_OS-dw	None	None	None	Cal_HS-dw	None	None	None	None	None	None	None	None	None	None	None	None
162.m02625	CNAG_04511	None	None	None	None	None	None	None	None	None	None	conserved hypothetical protein	None	None	None	None	None	None	None	None	None	None	None	None	None	None	None	None	None	None	None	None	None	None	None	None	None	None	None	None	None	None	None	None	None	None	None	None	None
162.m02627	CNAG_04505	YER020W	GPA2	SPAC23H3.13c	gpa2	orf19.1621	ca4012	GPA2	KOG0082	DT	G-protein alpha subunit (small G protein superfamily)	guanine nucleotide-binding protein subunit alpha	Nucleotide binding alpha subunit of the heterotrimeric G protein that interacts with the receptor Gpr1p, has signaling role in response to nutrients; green fluorescent protein (GFP)-fusion protein localizes to the cell periphery	heterotrimeric G protein alpha-2 subunit Gpa2	nucleotide-binding regulatory protein GPA2	Sce_OS-up_2.0	None	Sce_XS-up_2.0	None	Sce_HS-up_2.0	None	Sce_CSR-up_2.0	None	None	None	None	None	None	None	None	None	None	None	None	None	None	None	None	None	None	None	None	None	None	None	None	None	None	None
162.m02661	CNAG_04450	YER164W	CHD1	SPAC3G6.01	hrp3	orf19.3035	ca5064	CHD1	KOG0384	K	Chromodomain-helicase DNA-binding protein	transcription regulator	Nucleosome remodeling factor that functions in regulation of transcription elongation; contains a chromo domain, a helicase domain and a DNA-binding domain; component of both the SAGA and SLIK complexes	ATP-dependent DNA helicase Hrp3	transcriptional regulator (by homology)	None	None	None	None	None	None	None	None	None	None	None	None	None	None	None	None	None	None	None	None	None	None	None	None	None	None	None	None	None	None	None	None	None	None
162.m02712	CNAG_04393	None	None	None	None	None	None	None	KOG0952	A	DNA/RNA helicase MER3/SLH1, DEAD-box superfamily	RNA helicase	None	None	None	None	None	None	None	None	None	None	None	None	None	None	None	None	None	None	None	None	None	None	None	None	None	None	None	None	None	None	None	None	None	None	None	None	None
162.m02715	CNAG_04387	YPR082C	DIB1	SPCC16A11.05c	dim1	orf19.1975	ca0468	DIB1	KOG3414	AD	Component of the U4/U6.U5 snRNP/mitosis protein DIM1	pre-mRNA splicing factor	17-kDa component of the U4/U6aU5 tri-snRNP, plays an essential role in pre-mRNA splicing, orthologue of hDIM1, the human U5-specific 15-kDa protein	U4/U6 x U5 tri-snRNP complex subunit Dim1	Component of the U4/U6.U5 snRNP (by homology)	None	None	None	None	None	None	None	None	None	None	None	None	None	None	None	None	None	None	None	None	None	None	None	None	None	None	None	None	None	None	None	None	None	None
162.m02726	CNAG_04388	YHR008C	SOD2	SPAC1486.01	None	orf19.7111.1	None	None	KOG0876	P	Manganese superoxide dismutase	mitochondrial superoxide dismutase Sod2	Mitochondrial superoxide dismutase, protects cells against oxygen toxicity; phosphorylated	manganese superoxide dismutase (AF069292)	None	None	None	Sce_XS-up_2.0	None	Sce_HS-up_2.0	None	None	None	None	None	None	None	Spo_Cd-up_2.0	None	None	None	None	None	None	None	None	None	None	None	None	None	None	None	None	None	None	None	None	None
162.m02733	CNAG_04396	YCL012C	None	SPAC1687.07	None	orf19.7078	ca5620	IPF511	None	None	None	Aycl012	None	conserved fungal protein	unknown function	None	None	None	None	None	None	None	None	None	None	Spo_XS-up_2.0	None	None	None	None	None	None	None	None	None	None	None	None	None	None	None	None	None	None	None	None	None	None	None
162.m02759	CNAG_04344	None	None	None	None	None	None	None	None	None	None	mandelate racemase/muconate lactonizing enzyme	None	None	None	None	None	None	None	None	None	None	None	None	None	None	None	None	None	None	None	None	None	None	None	None	None	None	None	None	None	None	None	None	None	None	None	None	None
162.m02761	CNAG_04347	YER052C	HOM3	SPBC19F5.04	None	orf19.1235	ca2977	HOM3	KOG0456	E	Aspartate kinase	aspartate kinase	Aspartate kinase (L-aspartate 4-P-transferase); cytoplasmic enzyme that catalyzes the first step in the common pathway for methionine and threonine biosynthesis; expression regulated by Gcn4p and the general control of amino acid synthesis	aspartate kinase (predicted)	Aspartokinase (by homology)	None	None	Sce_XS-up_2.0	None	None	Sce_HS-dw_2.0	None	None	None	None	None	None	None	None	None	None	None	None	None	None	None	None	None	None	None	None	None	None	Cal_XS-up_1.5	None	Cal_XS-up_2.0	None	None	None
162.m02767	CNAG_04362	YOR046C	DBP5	SPBC12C2.06	None	orf19.1661	ca3464	DBP5	KOG0332	A	ATP-dependent RNA helicase	ATP-dependent RNA helicase DBP5	Cytoplasmic ATP-dependent RNA helicase of the DEAD-box family involved in mRNA export from the nucleus; involved in translation termination	ATP-dependent RNA helicase Dbp5	RNA helicase (by homology)	None	None	None	None	None	None	None	None	None	None	None	None	None	None	None	None	None	None	None	None	None	None	None	None	None	None	None	None	None	None	None	None	None	None
162.m02770	CNAG_04368	None	None	None	None	None	None	None	KOG2950	R	Uncharacterized protein involved in protein-protein interaction, contains polyproline-binding GYF domain	conserved hypothetical protein	None	None	None	None	None	None	None	None	None	None	None	None	None	None	None	None	None	None	None	None	None	None	None	None	None	None	None	None	None	None	None	None	None	None	None	None	None
162.m02779	CNAG_04320	None	None	None	None	None	None	None	KOG2571	M	Chitin synthase/hyaluronan synthase (glycosyltransferases)	polysaccharide synthase Cps1p	None	None	None	None	None	None	None	None	None	None	None	None	None	None	None	None	None	None	None	None	None	None	None	None	None	None	None	None	None	None	None	None	None	None	None	None	None
162.m02829	CNAG_04281	None	None	None	None	None	None	None	None	None	None	conserved hypothetical protein	None	None	None	None	None	None	None	None	None	None	None	None	None	None	None	None	None	None	None	None	None	None	None	None	None	None	None	None	None	None	None	None	None	None	None	None	None
162.m02833	CNAG_04290	None	None	None	None	None	None	None	None	None	None	conserved hypothetical protein	None	None	None	None	None	None	None	None	None	None	None	None	None	None	None	None	None	None	None	None	None	None	None	None	None	None	None	None	None	None	None	None	None	None	None	None	None
162.m02834	CNAG_04158	YBL008W	HIR1	SPBC31F10.13c	hip1	orf19.2099	ca2745	HIR1.3f	KOG0973	DK	Histone transcription regulator HIRA, WD repeat superfamily	transcription corepressor	Subunit of the HIR complex, a nucleosome assembly complex involved in regulation of histone gene transcription; contributes to nucleosome formation, heterochromatic gene silencing, and formation of functional kinetochores	hira protein Hip1	Histone transcription regulator (by homology)	None	None	None	None	None	None	None	None	None	None	None	None	None	None	None	None	None	None	None	None	None	None	None	None	None	None	None	None	None	None	None	None	None	None
162.m02898	CNAG_04202	YNL240C	NAR1	SPCC1450.10c	None	orf19.4757	ca2632	NAR1	KOG2439	Y	Nuclear architecture related protein	iron hydrogenase	Nuclear architecture related protein; component of the cytosolic iron-sulfur (FeS) protein assembly machinery, required for maturation of cytosolic and nuclear FeS proteins; homologous to human Narf	iron hydrogenase (predicted)	Yeast nuclear architecture related protein (by homology)	None	None	None	Sce_XS-dw_2.0	None	Sce_HS-dw_2.0	None	None	None	None	None	Spo_XS-dw_2.0	None	Spo_Cd-dw_2.0	None	None	None	Cal_OS-dw	None	None	None	None	None	Cal_SSR.OS-dw	None	None	None	None	Cal_XS-up_1.5	None	Cal_XS-up_2.0	None	None	None
162.m02911	CNAG_04259	YHR089C	GAR1	SPBC20F10.01	gar1	orf19.1164	ca1789	GAR1	KOG3262	J	H/ACA small nucleolar RNP component GAR1	small nucleolar RNP protein	Protein component of the H/ACA snoRNP pseudouridylase complex, involved in the modification and cleavage of the 18S pre-rRNA	snoRNP pseudouridylase complex protein Gar1	Nucleolar rRNA processing protein (by homology)	None	Sce_OS-dw_2.0	None	Sce_XS-dw_2.0	None	Sce_HS-dw_2.0	None	Sce_CSR-dw_2.0	None	None	None	Spo_XS-dw_2.0	None	Spo_Cd-dw_2.0	None	Spo_CESR-dw	None	Cal_OS-dw	None	Cal_XS-dw	None	Cal_HS-dw	None	Cal_CSR-dw	None	Cal_OS-dw_1.5	None	None	None	None	None	None	None	None
162.m02919	CNAG_04120	YMR277W	FCP1	SPAC19B12.05c	fcp1	orf19.6742	ca5952	IPF3503	KOG0323	K	TFIIF-interacting CTD phosphatases, including NLI-interacting factor	conserved hypothetical protein	Carboxy-terminal domain (CTD) phosphatase, essential for dephosphorylation of the repeated C-terminal domain of the RNA polymerase II large subunit (Rpo21p)	CTD phosphatase Fcp1	similar to Saccharomyces cerevisiae Fcp1p TFIIF interacting component of CTD phosphatase (by homology)	None	Sce_OS-dw_2.0	None	Sce_XS-dw_2.0	None	None	None	None	None	None	None	None	None	None	None	None	None	None	None	None	None	None	None	None	None	None	None	None	None	None	None	None	None	None
162.m02939	CNAG_04272	None	None	SPACUNK12.02c	cmk1	None	None	None	KOG0032	T	Ca2+/calmodulin-dependent protein kinase, EF-Hand protein superfamily	CAMK/CAMK1 protein kinase	None	calcium/calmodulin-dependent protein kinase Cmk1	None	None	None	None	None	None	None	None	None	None	None	None	None	None	None	None	None	None	None	None	None	None	None	None	None	None	None	None	None	None	None	None	None	None	None
162.m02953	CNAG_04236	None	None	None	None	None	None	None	KOG3120	R	Predicted haloacid dehalogenase-like hydrolase	acid phosphatase	None	None	None	None	None	None	None	None	None	None	None	None	None	None	None	None	None	None	None	None	None	None	None	None	None	None	None	None	None	None	None	None	None	None	None	None	None
162.m02962	CNAG_04515	None	None	None	None	None	None	None	KOG2491	Y	Nuclear matrix protein	conserved hypothetical protein	None	None	None	None	None	None	None	None	None	None	None	None	None	None	None	None	None	None	None	None	None	None	None	None	None	None	None	None	None	None	None	None	None	None	None	None	None
162.m02987	CNAG_04377	YOL138C	RTC1	SPAC4F8.11	None	None	None	None	KOG0269	S	WD40 repeat-containing protein	vacuolar protein	Putative protein of unknown function; may interact with ribosomes, based on co-purification experiments; null mutation suppresses cdc13-1 temperature sensitivity	WD repeat protein, human WDR24 family	None	None	None	None	None	None	None	None	None	None	None	None	None	None	None	None	None	None	None	None	None	None	None	None	None	None	None	None	None	None	None	None	None	None	None
162.m03011	CNAG_04362	YOR046C	DBP5	SPBC12C2.06	None	orf19.1661	ca3464	DBP5	KOG0332	A	ATP-dependent RNA helicase	ATP-dependent RNA helicase DBP5	Cytoplasmic ATP-dependent RNA helicase of the DEAD-box family involved in mRNA export from the nucleus; involved in translation termination	ATP-dependent RNA helicase Dbp5	RNA helicase (by homology)	None	None	None	None	None	None	None	None	None	None	None	None	None	None	None	None	None	None	None	None	None	None	None	None	None	None	None	None	None	None	None	None	None	None
162.m03028	CNAG_07758	None	None	None	None	None	None	None	KOG4814	S	Uncharacterized conserved protein	conserved hypothetical protein	None	None	None	None	None	None	None	None	None	None	None	None	None	None	None	None	None	None	None	None	None	None	None	None	None	None	None	None	None	None	None	None	None	None	None	None	None
162.m03032	CNAG_04146	None	None	None	None	None	None	None	KOG2084	B	Predicted histone tail methylase containing SET domain	conserved hypothetical protein	None	None	None	None	None	None	None	None	None	None	None	None	None	None	None	None	None	None	None	None	None	None	None	None	None	None	None	None	None	None	None	None	None	None	None	None	None
162.m03035	CNAG_04173	None	None	None	None	None	None	None	None	None	None	conserved hypothetical protein	None	None	None	None	None	None	None	None	None	None	None	None	None	None	None	None	None	None	None	None	None	None	None	None	None	None	None	None	None	None	None	None	None	None	None	None	None
162.m03041	CNAG_04172	YDR362C	TFC6	SPBC21H7.05	sfc6	None	None	None	None	None	None	conserved hypothetical protein	One of six subunits of RNA polymerase III transcription initiation factor complex (TFIIIC); part of TFIIIC TauB domain that binds BoxB promoter sites of tRNA and other genes; cooperates with Tfc3p in DNA binding; human homolog is TFIIIC-110	transcription factor TFIIIC complex subunit Sfc6	None	None	None	None	None	None	None	None	None	None	None	None	None	None	None	None	None	None	None	None	None	None	None	None	None	None	None	None	None	None	None	None	None	None	None
162.m03580	CNAG_04218	None	None	None	None	None	None	None	None	None	None	conserved hypothetical protein	None	None	None	None	None	None	None	None	None	None	None	None	None	None	None	None	None	None	None	None	None	None	None	None	None	None	None	None	None	None	None	None	None	None	None	None	None
162.m03600	CNAG_04244	None	None	None	None	None	None	None	KOG2615	R	Permease of the major facilitator superfamily	conserved hypothetical protein	None	None	None	None	None	None	None	None	None	None	None	None	None	None	None	None	None	None	None	None	None	None	None	None	None	None	None	None	None	None	None	None	None	None	None	None	None
162.m03602	CNAG_04275	None	None	None	None	None	None	None	KOG2661	O	Peptidase family M48	metalloendopeptidase	None	None	None	None	None	None	None	None	None	None	None	None	None	None	None	None	None	None	None	None	None	None	None	None	None	None	None	None	None	None	None	None	None	None	None	None	None
162.m03607	CNAG_04111	None	None	SPCC126.08c	None	orf19.2200	ca2436	IPF5500	KOG3839	U	Lectin VIP36, involved in the transport of glycoproteins carrying high mannose-type glycans	lectin	None	lectin (predicted)	unknown function	None	None	None	None	None	None	None	None	None	None	None	None	None	None	None	None	None	None	None	None	None	None	None	None	None	None	None	None	None	None	None	None	None	None
162.m03611	CNAG_04478	None	None	None	None	None	None	None	KOG1808	R	AAA ATPase containing von Willebrand factor type A (vWA) domain	conserved hypothetical protein	None	None	None	None	None	None	None	None	None	None	None	None	None	None	None	None	None	None	None	None	None	None	None	None	None	None	None	None	None	None	None	None	None	None	None	None	None
162.m04518	CNAG_04475	None	None	SPAC5H10.03	None	None	None	None	KOG4754	G	Predicted phosphoglycerate mutase	conserved hypothetical protein	None	phosphoglycerate mutase family	None	None	None	None	None	None	None	None	None	None	None	None	None	None	Spo_Cd-dw_2.0	None	None	None	None	None	None	None	None	None	None	None	None	None	None	None	None	None	None	None	None
162.m04531	CNAG_04410	YGR263C	SAY1	None	None	orf19.3924	ca2233	IFJ3	KOG1515	V	Arylacetamide deacetylase	endoplasmic reticulum protein	Sterol deacetylase; component of the sterol acetylation/deacetylation cycle along with Atf2p; integral membrane protein with active site in the ER lumen; green fluorescent protein (GFP)-fusion protein localizes to the endoplasmic reticulum	None	unknown function	None	None	None	Sce_XS-dw_2.0	None	None	None	None	None	None	None	None	None	None	None	None	None	None	None	None	None	None	None	None	None	None	None	None	None	None	None	None	None	None
162.m04549	CNAG_04319	None	None	None	None	None	None	None	KOG4828	S	Uncharacterized conserved protein	conserved hypothetical protein	None	None	None	None	None	None	None	None	None	None	None	None	None	None	None	None	None	None	None	None	None	None	None	None	None	None	None	None	None	None	None	None	None	None	None	None	None
162.m04563	CNAG_04220	YMR284W	YKU70	SPCC126.02c	pku70	orf19.1135	None	None	KOG2327	L	DNA-binding subunit of a DNA-dependent protein kinase (Ku70 autoantigen)	Ku70 protein	Subunit of the telomeric Ku complex (Yku70p-Yku80p), involved in telomere length maintenance, structure and telomere position effect; relocates to sites of double-strand cleavage to promote nonhomologous end joining during DSB repair	Ku domain protein Pku70	None	None	None	Sce_XS-up_2.0	None	Sce_HS-up_2.0	None	None	None	None	None	None	None	None	None	None	None	None	None	None	None	None	None	None	None	None	None	None	None	None	None	None	None	None	None
162.m04584	CNAG_04256	None	None	SPAC25H1.04	mug105	None	None	None	KOG4696	S	Uncharacterized conserved protein	conserved hypothetical protein	None	DUF1671 family protein	None	None	None	None	None	None	None	None	None	Spo_OS-up_2.0	None	None	None	None	None	None	None	None	None	None	None	None	None	None	None	None	None	None	None	None	None	None	None	None	None
163.m02758	CNAG_01136	None	None	SPBC16A3.04	rsm25	None	None	None	None	None	None	conserved hypothetical protein	None	mitochondrial ribosomal protein subunit Rsm25	None	None	None	None	None	None	None	None	None	None	None	None	None	None	None	None	None	None	None	None	None	None	None	None	None	None	None	None	None	None	None	None	None	None	None
163.m02932	CNAG_00967	None	None	None	None	None	None	None	KOG4197	R	FOG: PPR repeat	conserved hypothetical protein	None	None	None	None	None	None	None	None	None	None	None	None	None	None	None	None	None	None	None	None	None	None	None	None	None	None	None	None	None	None	None	None	None	None	None	None	None
163.m03775	CNAG_00874	YBL024W	NCL1	SPAC23C4.17	None	orf19.518	ca4235	NCL1	KOG2198	J	tRNA cytosine-5-methylases and related enzymes of the NOL1/NOP2/sun superfamily	tRNA (cytosine-5-)-methyltransferase	S-adenosyl-L-methionine-dependent tRNA: m5C-methyltransferase, methylates cytosine to m5C at several positions in tRNAs and intron-containing pre-tRNAs; similar to Nop2p and human proliferation associated nucleolar protein p120	tRNA (cytosine-5-)-methyltransferase (predicted)	Probable proliferating-cell nucleolar antigen (by homology)	None	Sce_OS-dw_2.0	None	Sce_XS-dw_2.0	None	Sce_HS-dw_2.0	None	Sce_CSR-dw_2.0	None	None	None	Spo_XS-dw_2.0	None	Spo_Cd-dw_2.0	None	Spo_CESR-dw	None	None	None	Cal_XS-dw	None	None	None	Cal_SSR.XS-dw	None	None	None	None	None	Cal_XS-dw_1.5	None	None	None	None
163.m03786	CNAG_00891	YER036C	ARB1	SPBC16H5.08c	None	orf19.2183	ca3736	IPF5533	KOG0927	R	Predicted transporter (ABC superfamily)	ATP-binding cassette transporter	ATPase of the ATP-binding cassette (ABC) family involved in 40S and 60S ribosome biogenesis, has similarity to Gcn20p; shuttles from nucleus to cytoplasm, physically interacts with Tif6p, Lsg1p	ribosome biogenesis ATPase, Arb family (predicted)	ABC transporter (by homology)	None	None	None	Sce_XS-dw_2.0	None	Sce_HS-dw_2.0	None	None	None	None	None	Spo_XS-dw_2.0	None	Spo_Cd-dw_2.0	None	None	None	None	None	Cal_XS-dw	None	None	None	Cal_SSR.XS-dw	None	Cal_OS-dw_1.5	None	None	None	Cal_XS-dw_1.5	None	None	None	Cal_Cd-dw_1.5
163.m03817	CNAG_00914	None	None	None	None	None	None	None	None	None	None	glucosidase	None	None	None	None	None	None	None	None	None	None	None	None	None	None	None	None	None	None	None	None	None	None	None	None	None	None	None	None	None	None	None	None	None	None	None	None	None
163.m03819	CNAG_00909	YKR072C	SIS2	None	None	None	None	None	KOG0672	PD	Halotolerance protein HAL3 (contains flavoprotein domain)	HAL3B protein	Negative regulatory subunit of the protein phosphatase 1 Ppz1p; involved in ion homeostasis and cell cycle progression	None	None	None	None	None	None	None	None	None	None	None	None	None	None	None	None	None	None	None	None	None	None	None	None	None	None	None	None	None	None	None	None	None	None	None	None
163.m03822	CNAG_00904	YKR105C	None	None	None	orf19.1942	ca3356	IPF9560	KOG0254	R	Predicted transporter (major facilitator superfamily)	aflatoxin efflux pump AFLT	None	None	unknown function	None	None	None	None	None	None	None	None	None	None	None	None	None	None	None	None	None	None	None	None	None	None	None	None	None	None	None	None	None	None	None	None	None	None
163.m03829	CNAG_00938	None	None	None	None	None	None	None	KOG0714	O	Molecular chaperone (DnaJ superfamily)	conserved hypothetical protein	None	None	None	None	None	None	None	None	None	None	None	None	None	None	None	None	None	None	None	None	None	None	None	None	None	None	None	None	None	None	None	None	None	None	None	None	None
163.m03860	CNAG_01019	YJR104C	SOD1	SPAC821.10c	sod1	orf19.2770.1	ca4120	SOD1	KOG0441	P	Cu2+/Zn2+ superoxide dismutase SOD1	Cu/Zn superoxide dismutase	Cytosolic superoxide dismutase; some mutations are analogous to those that cause ALS (amyotrophic lateral sclerosis) in humans	superoxide dismutase Sod1	Cu,Zn-superoxide dismutase	None	None	Sce_XS-up_2.0	None	None	None	None	None	None	None	Spo_XS-up_2.0	None	None	None	None	None	None	None	None	None	None	None	None	None	None	None	None	None	None	None	None	None	None	None
163.m03861	CNAG_01018	YER025W	GCD11	SPBC17G9.09	tif213	orf19.4223	ca1322	GCD11	KOG0466	J	Translation initiation factor 2, gamma subunit (eIF-2gamma; GTPase)	eukaryotic translation initiation factor 2 gamma	Gamma subunit of the translation initiation factor eIF2, involved in the identification of the start codon; binds GTP when forming the ternary complex with GTP and tRNAi-Met	translation initiation factor eIF2 gamma subunit	Translation initiation factor eIF2 (by homology)	None	None	None	Sce_XS-dw_2.0	None	Sce_HS-dw_2.0	None	None	None	None	None	None	None	None	None	None	None	None	None	None	None	None	None	None	None	None	None	None	None	None	None	None	None	Cal_Cd-dw_1.5
163.m03886	CNAG_00987	YGR078C	PAC10	SPAC3H8.07c	None	orf19.5985	ca6076	PAC10	KOG3313	O	Molecular chaperone Prefoldin, subunit 3	prefoldin subunit	Part of the heteromeric co-chaperone GimC/prefoldin complex, which promotes efficient protein folding	prefoldin subunit 3 (predicted)	Non-native Actin Binding Complex Component (by homology)	None	None	None	None	None	None	None	None	None	None	None	None	None	None	None	None	None	None	None	None	None	None	None	None	None	None	None	None	None	None	None	None	None	None
163.m03924	CNAG_00993	YOR125C	CAT5	SPBC337.15c	coq7	orf19.1940	ca3358	IPF19984	KOG4061	R	DMQ mono-oxygenase/Ubiquinone biosynthesis protein COQ7/CLK-1/CAT5	coenzyme q10 biosynthesis protein	Protein required for ubiquinone (Coenzyme Q) biosynthesis; localizes to the matrix face of the mitochondrial inner membrane in a large complex with ubiquinone biosynthetic enzymes; required for gluconeogenic gene activation	ubiquinone biosynthesis protein Coq7	similar to Saccharomyces cerevisiae Cat5p involved in coenzyme Q (ubiquinone) biosynthesis (by homology)	None	None	None	Sce_XS-dw_2.0	Sce_HS-up_2.0	None	None	None	None	None	None	None	None	None	None	None	None	None	None	None	None	None	None	None	None	None	None	None	None	None	None	None	None	None
163.m03925	CNAG_00990	None	None	SPBC29A3.10c	atp14	None	None	None	None	None	None	CIPB	None	F1-ATPase subunit H (predicted)	None	None	None	None	None	None	None	None	None	None	None	None	None	None	None	None	None	None	None	None	None	None	None	None	None	None	None	None	None	None	None	None	None	None	None
163.m03930	CNAG_00979	YLR411W	CTR3	SPCC1393.10	ctr4	None	None	None	KOG3386	P	Copper transporter	copper uptake transporter	High-affinity copper transporter of the plasma membrane, acts as a trimer; gene is disrupted by a Ty2 transposon insertion in many laboratory strains of S. cerevisiae	copper transporter complex subunit Ctr4	None	None	None	None	None	None	None	None	None	None	None	None	None	None	None	None	None	None	None	None	None	None	None	None	None	None	None	None	None	None	None	None	None	None	None
163.m03931	CNAG_00977	YHR108W	GGA2	SPBC25H2.16c	None	orf19.3006	ca3121	GGA1	KOG1087	U	Cytosolic sorting protein GGA2/TOM1	VHS domain-containing protein	Golgi-localized protein with homology to gamma-adaptin, interacts with and regulates Arf1p and Arf2p in a GTP-dependent manner in order to facilitate traffic through the late Golgi	adaptin (predicted)	Arf-binding protein	None	None	None	None	None	None	None	None	None	None	None	None	None	None	None	None	None	None	None	None	None	None	None	None	None	None	None	None	None	None	None	None	None	None
163.m04752	CNAG_00901	None	None	None	None	None	None	None	None	None	None	conserved hypothetical protein	None	None	None	None	None	None	None	None	None	None	None	None	None	None	None	None	None	None	None	None	None	None	None	None	None	None	None	None	None	None	None	None	None	None	None	None	None
163.m04808	CNAG_01050	None	None	SPBC1921.06c	pvg3	None	None	None	KOG2287	G	Galactosyltransferases	conserved hypothetical protein	None	beta-1,3-galactosyltransferase	None	None	None	None	None	None	None	None	None	None	None	None	None	None	None	None	None	None	None	None	None	None	None	None	None	None	None	None	None	None	None	None	None	None	None
163.m04810	CNAG_01020	None	None	None	None	None	None	None	None	None	None	conserved hypothetical protein	None	None	None	None	None	None	None	None	None	None	None	None	None	None	None	None	None	None	None	None	None	None	None	None	None	None	None	None	None	None	None	None	None	None	None	None	None
163.m04814	CNAG_01363	YJR072C	NPA3	SPBC119.15	None	orf19.6463	ca3663	IPF11432	KOG1532	L	GTPase XAB1, interacts with DNA repair protein XPA	XPA-binding protein 1	Essential, conserved, cytoplasmic ATPase; phosphorylated by the Pcl1p-Pho85p kinase complex	AAA family ATPase, unknown biological role	unknown function	None	Sce_OS-dw_2.0	None	None	None	Sce_HS-dw_2.0	None	None	None	None	None	None	None	None	None	None	None	None	None	None	None	None	None	None	None	None	None	None	Cal_XS-up_1.5	None	None	None	None	None
163.m06141	CNAG_01387	None	None	None	None	None	None	None	None	None	None	conserved hypothetical protein	None	None	None	None	None	None	None	None	None	None	None	None	None	None	None	None	None	None	None	None	None	None	None	None	None	None	None	None	None	None	None	None	None	None	None	None	None
163.m06143	CNAG_01384	None	None	None	None	None	None	None	KOG2533	G	Permease of the major facilitator superfamily	bodown198	None	None	None	None	None	None	None	None	None	None	None	None	None	None	None	None	None	None	None	None	None	None	None	None	None	None	None	None	None	None	None	None	None	None	None	None	None
163.m06159	CNAG_01103	YDL043C	PRP11	SPBC21C3.05	sap62	orf19.4724	ca1604	IPF13653	KOG0227	A	Splicing factor 3a, subunit 2	zinc finger protein Sap62	Subunit of the SF3a splicing factor complex, required for spliceosome assembly	zinc finger protein Sap62	unknown function	None	None	None	None	None	None	None	None	None	None	None	None	None	None	None	None	None	Cal_OS-dw	None	None	None	None	None	Cal_SSR.OS-dw	None	None	None	None	None	None	None	None	None	None
163.m06202	CNAG_01152	YPL090C	RPS6A	SPAPB1E7.12	rps602	orf19.4660	ca2708	RPS6A	KOG1646	J	40S ribosomal protein S6	40s ribosomal protein s6-b	Protein component of the small (40S) ribosomal subunit; identical to Rps6Bp and has similarity to rat S6 ribosomal protein	40S ribosomal protein S6	ribosomal protein S6 (by homology)	None	Sce_OS-dw_2.0	None	Sce_XS-dw_2.0	None	Sce_HS-dw_2.0	None	Sce_CSR-dw_2.0	None	None	None	None	None	None	None	None	None	None	None	Cal_XS-dw	None	None	None	Cal_SSR.XS-dw	None	None	None	None	None	None	None	None	None	None
163.m06204	CNAG_01150	None	None	None	None	orf19.118	ca0482	IPF14763	None	None	None	delta-12 fatty acid desaturase	None	None	delta-12 fatty acid desaturase (by homology)	None	None	None	None	None	None	None	None	None	None	None	None	None	None	None	None	None	None	None	None	None	Cal_HS-dw	None	Cal_SSR.HS-dw	None	Cal_OS-dw_1.5	None	Cal_OS-dw_2.0	None	None	None	None	None	None
163.m06205	CNAG_01147	YKL013C	ARC19	SPAC6G9.07c	arc4	orf19.3251	ca5448	ARC19.3f	KOG1876	Z	Actin-related protein Arp2/3 complex, subunit ARPC4	ARP2/3 complex 20 kDa subunit	Subunit of the ARP2/3 complex, which is required for the motility and integrity of cortical actin patches	ARP2/3 actin-organizing complex subunit Arc4	subunit of the Arp2/3 complex involved in the control of actin polymerization, exon 2 (by homology)	None	None	None	None	None	None	None	None	None	None	None	None	None	None	None	None	None	None	None	None	None	None	None	None	None	None	None	None	None	None	None	None	None	None
163.m06216	CNAG_01132	YDL213C	NOP6	SPBC365.04c	None	orf19.6236	ca3006	IPF12152	KOG0118	R	FOG: RRM domain	conserved hypothetical protein	Putative RNA-binding protein implicated in ribosome biogenesis; contains an RNA recognition motif (RRM) and has similarity to hydrophilins; NOP6 may be a fungal-specific gene as no homologs have been yet identified in higher eukaryotes	RNA-binding protein	unknown function	None	None	Sce_XS-up_2.0	None	None	Sce_HS-dw_2.0	None	None	None	None	None	Spo_XS-dw_2.0	None	None	None	None	None	Cal_OS-dw	None	None	None	Cal_HS-dw	None	None	None	None	None	None	None	None	None	None	None	None
163.m06237	CNAG_01400	YBR249C	ARO4	None	None	orf19.4060	ca1484	ARO4	None	None	None	3-deoxy-7-phosphoheptulonate synthase	3-deoxy-D-arabino-heptulosonate-7-phosphate (DAHP) synthase, catalyzes the first step in aromatic amino acid biosynthesis and is feedback-inhibited by tyrosine or high concentrations of phenylalanine or tryptophan	None	3-dehydro-deoxyphosphoheptonate aldolase, tyrosine-inhibited (by homology)	None	Sce_OS-dw_2.0	None	None	None	Sce_HS-dw_2.0	None	None	None	None	None	None	None	None	None	None	None	None	None	None	None	None	None	None	None	None	None	None	None	None	None	None	None	None
163.m06251	CNAG_01187	YKR081C	RPF2	SPAC926.08c	None	orf19.3553	ca2662	IPF17139	KOG3031	J	Protein required for biogenesis of the ribosomal 60S subunit	ribosome biogenesis protein RPF2	Essential protein involved in the processing of pre-rRNA and the assembly of the 60S ribosomal subunit; interacts with ribosomal protein L11; localizes predominantly to the nucleolus; constituent of 66S pre-ribosomal particles	Brix domain protein Rpf2 (predicted)	unknown function	None	Sce_OS-dw_2.0	None	Sce_XS-dw_2.0	None	Sce_HS-dw_2.0	None	Sce_CSR-dw_2.0	None	None	None	Spo_XS-dw_2.0	None	Spo_Cd-dw_2.0	None	Spo_CESR-dw	None	Cal_OS-dw	None	None	None	Cal_HS-dw	None	None	None	None	None	None	None	None	None	None	None	None
163.m06278	CNAG_07437	YLR100W	ERG27	SPBC1709.07	erg27	orf19.3240	ca5437	ERG27	KOG1478	I	3-keto sterol reductase	3-keto sterol reductase	3-keto sterol reductase, catalyzes the last of three steps required to remove two C-4 methyl groups from an intermediate in ergosterol biosynthesis; mutants are sterol auxotrophs	3-keto sterol reductase (predicted)	3-keto sterol reductase (by homology)	None	None	None	None	None	None	None	None	None	None	None	None	None	None	None	None	None	None	None	None	None	None	None	None	None	None	None	None	None	None	None	None	None	None
163.m06279	CNAG_01174	YJL108C	PRM10	SPAC7D4.12c	None	orf19.6527	ca4951	IPF13607	None	None	None	DUF1212 family protein	Pheromone-regulated protein, predicted to have 5 transmembrane segments; induced by treatment with 8-methoxypsoralen and UVA irradiation	DUF1212 family protein	unknown function	Sce_OS-up_2.0	None	None	None	Sce_HS-up_2.0	None	None	None	None	None	None	None	None	None	None	None	None	None	None	None	None	None	None	None	Cal_OS-up_1.5	None	Cal_OS-up_2.0	None	Cal_XS-up_1.5	None	Cal_XS-up_2.0	None	None	None
163.m06318	CNAG_01431	None	None	None	None	None	None	None	KOG0490	R	Transcription factor, contains HOX domain	conserved hypothetical protein	None	None	None	None	None	None	None	None	None	None	None	None	None	None	None	None	None	None	None	None	None	None	None	None	None	None	None	None	None	None	None	None	None	None	None	None	None
163.m06321	CNAG_01422	YBR287W	None	SPAC5D6.04	None	orf19.6117	ca0262	IPF20054	KOG2722	S	Predicted membrane protein	endoplasmic reticulum protein	None	auxin family transmembrane transporter (predicted)	None	None	None	None	None	Sce_HS-up_2.0	None	None	None	None	None	Spo_XS-up_2.0	None	None	None	None	None	None	None	None	None	None	None	None	None	None	None	None	None	Cal_XS-up_1.5	None	Cal_XS-up_2.0	None	Cal_Cd-up_1.5	None
163.m06324	CNAG_01422	YBR287W	None	SPAC5D6.04	None	orf19.6117	ca0262	IPF20054	KOG2722	S	Predicted membrane protein	endoplasmic reticulum protein	None	auxin family transmembrane transporter (predicted)	None	None	None	None	None	Sce_HS-up_2.0	None	None	None	None	None	Spo_XS-up_2.0	None	None	None	None	None	None	None	None	None	None	None	None	None	None	None	None	None	Cal_XS-up_1.5	None	Cal_XS-up_2.0	None	Cal_Cd-up_1.5	None
163.m06325	CNAG_01421	None	None	None	None	None	None	None	None	None	None	conserved hypothetical protein	None	None	None	None	None	None	None	None	None	None	None	None	None	None	None	None	None	None	None	None	None	None	None	None	None	None	None	None	None	None	None	None	None	None	None	None	None
163.m06329	CNAG_01413	YNL016W	PUB1	SPBC23E6.01c	None	orf19.7368	ca5666	PUB1	KOG0118	R	FOG: RRM domain	nuclear and cytoplasmic polyadenylated RNA-binding protein pub1	Poly(A)+ RNA-binding protein, abundant mRNP-component protein that binds mRNA and is required for stability of a number of mRNAs; not reported to associate with polyribosomes	RNA-binding protein, rrm type	Major polyadenylated RNA-binding protein (by homology)	None	None	None	None	None	None	None	None	None	None	None	None	None	None	None	None	None	None	None	None	None	None	None	None	None	None	None	None	None	Cal_XS-dw_1.5	None	None	None	None
163.m06403	CNAG_07400	YLL018C	DPS1	SPCC1223.07c	None	orf19.2407	ca3052	DPS1	KOG0556	J	Aspartyl-tRNA synthetase	aspartate-tRNA ligase	Cytoplasmic aspartyl-tRNA synthetase, homodimeric enzyme that catalyzes the specific aspartylation of tRNA(Asp); class II aminoacyl tRNA synthetase; binding to its own mRNA may confer autoregulation	aspartate-tRNA ligase (predicted)	aspartyl-tRNA synthetase (by homology)	None	None	None	None	None	None	None	None	None	None	None	None	None	None	None	None	None	None	None	None	None	None	None	None	None	None	None	None	None	None	None	None	None	None
163.m06413	CNAG_06838	YPL029W	SUV3	SPAC637.11	suv3	orf19.4519	ca2908	SUV3	KOG0953	A	Mitochondrial RNA helicase SUV3, DEAD-box superfamily	mitochondrial RNA helicase	ATP-dependent RNA helicase, component of the mitochondrial degradosome along with the RNase Dss1p; the degradosome associates with the ribosome and mediates turnover of aberrant or unprocessed RNAs	mitochondrial ATP-dependent RNA helicase Suv3 (predicted)	ATP-dependent RNA helicase, mitochondrial (by homology)	None	None	None	None	None	None	None	None	None	None	None	None	None	None	None	None	None	None	None	None	None	None	None	None	None	None	None	None	None	Cal_XS-dw_1.5	None	None	None	None
163.m06415	CNAG_06835	YPR159W	KRE6	SPAC23H3.11c	None	None	None	None	None	None	None	glucosidase	Protein required for beta-1,6 glucan biosynthesis; putative beta-glucan synthase; appears functionally redundant with Skn1p	glucosidase (predicted)	None	None	None	None	None	Sce_HS-up_2.0	None	None	None	None	None	None	None	None	None	None	None	None	None	None	None	None	None	None	None	None	None	None	None	None	None	None	None	None	None
163.m06465	CNAG_06949	None	None	None	None	None	None	None	None	None	None	hypothetical protein	None	None	None	None	None	None	None	None	None	None	None	None	None	None	None	None	None	None	None	None	None	None	None	None	None	None	None	None	None	None	None	None	None	None	None	None	None
163.m06480	CNAG_01298	YML059C	NTE1	SPCC4B3.04c	nte1	orf19.6396	None	None	KOG2968	R	Predicted esterase of the alpha-beta hydrolase superfamily (Neuropathy target esterase), contains cAMP-binding domains	hydrolase	Serine esterase that deacylates exogenous lysophospholipids, homolog of human neuropathy target esterase (NTE); mammalian NTE1 deacylates phosphatidylcholine to glycerophosphocholine	lysophospholipase	None	None	None	None	None	None	None	None	None	None	None	None	None	None	None	None	None	None	None	None	None	None	None	None	None	None	None	None	None	None	None	None	None	None	None
163.m06504	CNAG_01323	YDR529C	QCR7	SPCC737.02c	qcr7	orf19.5629	ca2764	QCR7	KOG3440	C	Ubiquinol cytochrome c reductase, subunit QCR7	ubiquinol-cytochrome-c reductase	Subunit 7 of the ubiquinol cytochrome-c reductase complex, which is a component of the mitochondrial inner membrane electron transport chain; oriented facing the mitochondrial matrix; N-terminus appears to play a role in complex assembly	ubiquinol-cytochrome-c reductase complex subunit 6	ubiquinol--cytochrome-c reductase subunit 7 (by homology)	None	None	None	None	Sce_HS-up_2.0	None	None	None	None	None	None	None	None	None	None	None	None	None	None	None	None	None	None	None	None	None	None	None	None	None	None	None	None	None
163.m06520	CNAG_01347	None	None	SPBC543.02c	None	orf19.3592	ca0872	IPF13100	KOG0624	V	dsRNA-activated protein kinase inhibitor P58, contains TPR and DnaJ domains	co-chaperone	None	DNAJ/TPR domain protein DNAJC7 family	unknown function	None	None	None	None	None	None	None	None	None	None	None	None	None	None	None	None	None	None	None	None	None	None	None	None	None	None	None	None	None	None	None	None	None	None
163.m06523	CNAG_01341	None	None	None	None	None	None	None	KOG1735	Z	Actin depolymerizing factor	mannose-6-phosphate isomerase	None	None	None	None	None	None	None	None	None	None	None	None	None	None	None	None	None	None	None	None	None	None	None	None	None	None	None	None	None	None	None	None	None	None	None	None	None
163.m06524	CNAG_01341	None	None	None	None	None	None	None	KOG1735	Z	Actin depolymerizing factor	mannose-6-phosphate isomerase	None	None	None	None	None	None	None	None	None	None	None	None	None	None	None	None	None	None	None	None	None	None	None	None	None	None	None	None	None	None	None	None	None	None	None	None	None
163.m06527	CNAG_01331	None	None	None	None	None	None	None	None	None	None	conserved hypothetical protein	None	None	None	None	None	None	None	None	None	None	None	None	None	None	None	None	None	None	None	None	None	None	None	None	None	None	None	None	None	None	None	None	None	None	None	None	None
163.m06530	CNAG_01322	None	None	None	None	None	None	None	KOG1064	R	RAVE (regulator of V-ATPase assembly) complex subunit RAV1/DMX protein, WD repeat superfamily	conserved hypothetical protein	None	None	None	None	None	None	None	None	None	None	None	None	None	None	None	None	None	None	None	None	None	None	None	None	None	None	None	None	None	None	None	None	None	None	None	None	None
163.m06554	None	None	None	None	None	None	None	None	None	None	None	None	None	None	None	None	None	None	None	None	None	None	None	None	None	None	None	None	None	None	None	None	None	None	None	None	None	None	None	None	None	None	None	None	None	None	None	None	None
163.m06562	None	None	None	None	None	None	None	None	None	None	None	None	None	None	None	None	None	None	None	None	None	None	None	None	None	None	None	None	None	None	None	None	None	None	None	None	None	None	None	None	None	None	None	None	None	None	None	None	None
163.m06575	CNAG_00902	None	None	None	None	None	None	None	KOG4267	S	Predicted membrane protein	conserved hypothetical protein	None	None	None	None	None	None	None	None	None	None	None	None	None	None	None	None	None	None	None	None	None	None	None	None	None	None	None	None	None	None	None	None	None	None	None	None	None
163.m06614	CNAG_01440	None	None	SPAC31G5.12c	maf1	None	None	None	KOG3104	K	Mod5 protein sorting/negative effector of RNA Pol III synthesis	conserved hypothetical protein	None	repressor of RNA polymerase III Maf1 (predicted)	None	None	None	None	None	None	None	None	None	Spo_OS-up_2.0	None	None	None	None	None	None	None	None	None	None	None	None	None	None	None	None	None	None	None	None	None	None	None	None	None
164.m01452	CNAG_06173	YMR130W	None	SPAC7D4.05	None	orf19.2076	ca4821	IPF1197	KOG3085	R	Predicted hydrolase (HAD superfamily)	conserved hypothetical protein	None	hydrolase (predicted)	unknown function	None	None	None	None	None	Sce_HS-dw_2.0	None	None	None	None	None	None	None	None	None	None	None	None	None	None	None	None	None	None	None	None	None	None	None	None	None	None	None	None
164.m01563	CNAG_06064	None	None	SPAC11E3.09	pyp3	None	None	None	KOG0791	T	Protein tyrosine phosphatase, contains fn3 domain	conserved hypothetical protein	None	protein-tyrosine phosphatase Pyp3	None	None	None	None	None	None	None	None	None	None	None	Spo_XS-up_2.0	None	None	None	None	None	None	None	None	None	None	None	None	None	None	None	None	None	None	None	None	None	None	None
164.m01643	CNAG_05998	None	None	None	None	None	None	None	KOG0393	R	Ras-related small GTPase, Rho type	rho GTPase	None	None	None	None	None	None	None	None	None	None	None	None	None	None	None	None	None	None	None	None	None	None	None	None	None	None	None	None	None	None	None	None	None	None	None	None	None
164.m01996	CNAG_06029	YOL114C	None	None	None	orf19.425	ca4050	IPF20007	KOG3429	J	Predicted peptidyl-tRNA hydrolase	conserved hypothetical protein	None	None	unknown function	None	None	None	None	Sce_HS-up_2.0	None	None	None	None	None	None	None	None	None	None	None	None	None	None	None	None	None	None	None	None	None	None	None	None	None	None	None	None	None
164.m02001	CNAG_07703	None	None	None	None	None	None	None	None	None	None	conserved hypothetical protein	None	None	None	None	None	None	None	None	None	None	None	None	None	None	None	None	None	None	None	None	None	None	None	None	None	None	None	None	None	None	None	None	None	None	None	None	None
164.m02040	CNAG_06016	None	None	None	None	None	None	None	KOG2169	K	Zn-finger transcription factor	CAP6p	None	None	None	None	None	None	None	None	None	None	None	None	None	None	None	None	None	None	None	None	None	None	None	None	None	None	None	None	None	None	None	None	None	None	None	None	None
164.m02043	CNAG_06010	YMR110C	HFD1	None	None	orf19.6066	ca4927	IPF1401	KOG2456	C	Aldehyde dehydrogenase	fatty aldehyde dehydrogenase	Putative fatty aldehyde dehydrogenase, located in the mitochondrial outer membrane and also in lipid particles; has similarity to human fatty aldehyde dehydrogenase (FALDH) which is implicated in Sjogren-Larsson syndrome	None	similarity to aldehyde dehydrogenase (by homology)	Sce_OS-up_2.0	None	Sce_XS-up_2.0	None	Sce_HS-up_2.0	None	Sce_CSR-up_2.0	None	None	None	None	None	None	None	None	None	None	None	Cal_XS-up	None	None	None	Cal_SSR.XS-up	None	None	None	None	None	None	None	None	None	None	None
164.m02064	CNAG_06080	YKL212W	SAC1	SPBC19F5.03	None	orf19.4865	ca4722	SAC1	KOG1889	I	Putative phosphoinositide phosphatase	inositol/phosphatidylinositol phosphatase	Phosphatidylinositol (PI) phosphatase, involved in hydrolysis of PI 3-phosphate, PI 4-phosphate and PI 3,5-bisphosphate to PI; membrane protein localizes to ER and Golgi; involved in protein trafficking, secretion and inositol metabolism	inositol polyphosphate phosphatase (predicted)	integral membrane protein localizing to the ER and Golgi (by homology)	None	None	None	None	None	None	None	None	None	None	None	None	None	None	None	None	None	None	None	Cal_XS-dw	None	None	None	Cal_SSR.XS-dw	None	None	None	None	None	None	None	None	None	None
164.m02071	CNAG_06095	YMR142C	RPL13B	SPAC664.05	rpl13	orf19.2994	ca2818	RPL13	KOG3295	J	60S Ribosomal protein L13	ribosomal protein L13	Protein component of the large (60S) ribosomal subunit, nearly identical to Rpl13Ap; not essential for viability; has similarity to rat L13 ribosomal protein	60S ribosomal protein L13	Ribosomal protein	None	Sce_OS-dw_2.0	None	Sce_XS-dw_2.0	None	Sce_HS-dw_2.0	None	Sce_CSR-dw_2.0	None	None	None	Spo_XS-dw_2.0	None	None	None	None	None	None	None	None	None	None	None	None	None	None	None	None	None	None	None	None	None	None
164.m02080	CNAG_06101	YBL030C	PET9	SPBC530.10c	anc1	orf19.930	ca5388	PET9	KOG0749	C	Mitochondrial ADP/ATP carrier proteins	eukaryotic ADP/ATP carrier	Major ADP/ATP carrier of the mitochondrial inner membrane, exchanges cytosolic ADP for mitochondrially synthesized ATP; phosphorylated; required for viability in many common lab strains carrying a mutation in the polymorphic SAL1 gene	adenine nucleotide carrier Anc1	ADP/ATP carrier protein (by homology)	None	None	None	None	None	None	None	None	None	None	None	None	None	None	None	None	None	None	None	None	None	None	None	None	None	None	None	None	None	None	None	None	None	None
164.m02081	CNAG_06102	None	None	None	None	None	None	None	KOG0749	C	Mitochondrial ADP/ATP carrier proteins	eukaryotic ADP/ATP carrier	None	None	None	None	None	None	None	None	None	None	None	None	None	None	None	None	None	None	None	None	None	None	None	None	None	None	None	None	None	None	None	None	None	None	None	None	None
164.m02085	CNAG_06088	YLR027C	AAT2	None	None	orf19.3554	ca2661	AAT1	KOG1411	E	Aspartate aminotransferase/Glutamic oxaloacetic transaminase AAT1/GOT2	aspartate aminotransferase	Cytosolic aspartate aminotransferase, involved in nitrogen metabolism; localizes to peroxisomes in oleate-grown cells	None	aspartate aminotransferase (by homology)	None	None	None	None	None	None	None	None	None	None	None	None	None	None	None	None	None	None	None	None	Cal_HS-up	None	Cal_SSR.HS-up	None	None	None	None	None	None	None	None	None	None	None
164.m02105	CNAG_06128	None	None	None	None	None	None	None	KOG0570	K	Transcriptional coactivator	conserved hypothetical protein	None	None	None	None	None	None	None	None	None	None	None	None	None	None	None	None	None	None	None	None	None	None	None	None	None	None	None	None	None	None	None	None	None	None	None	None	None
164.m02126	CNAG_06143	None	None	SPBC13G1.04c	None	None	None	None	KOG2731	A	DNA alkylation damage repair protein	conserved hypothetical protein	None	alkB homolog	None	None	None	None	None	None	None	None	None	None	None	None	Spo_XS-dw_2.0	None	None	None	None	None	None	None	None	None	None	None	None	None	None	None	None	None	None	None	None	None	None
164.m02136	CNAG_06167	YBR290W	BSD2	SPAC328.07c	None	orf19.5869	ca0243	BSD2	KOG4812	R	Golgi-associated protein/Nedd4 WW domain-binding protein	metal homeostatis protein bsd2	Heavy metal ion homeostasis protein, facilitates trafficking of Smf1p and Smf2p metal transporters to the vacuole where they are degraded, controls metal ion transport, prevents metal hyperaccumulation, functions in copper detoxification	heavy metal ion homeostasis protein (predicted)	Metal homeostasis protein (by homology)	None	None	None	None	None	None	None	None	None	None	Spo_XS-up_2.0	None	Spo_Cd-up_2.0	None	None	None	None	None	None	None	None	None	None	None	None	None	None	None	None	None	None	None	None	None
164.m02137	CNAG_06170	YJL068C	None	None	None	orf19.6596	ca3836	IPF8179	None	None	None	carboxylesterase	None	None	putative esterase (by homology)	None	None	None	None	Sce_HS-up_2.0	None	None	None	None	None	None	None	None	None	None	None	None	None	None	None	None	None	None	None	None	None	None	None	None	None	None	None	None	None
164.m02165	CNAG_07914	YAL016W	TPD3	SPAP8A3.09c	paa1	orf19.6810	ca5896	TPD3	KOG0211	T	Protein phosphatase 2A regulatory subunit A and related proteins	PDF2	Regulatory subunit A of the heterotrimeric protein phosphatase 2A, which also contains regulatory subunit Cdc55p and either catalytic subunit Pph21p or Pph22p; required for cell morphogenesis and for transcription by RNA polymerase III	protein phosphatase regulatory subunit Paa1	Ser/thr protein phosphatase (by homology)	None	None	None	None	None	None	None	None	None	None	None	None	None	None	None	None	None	None	None	None	None	None	None	None	None	None	None	None	None	Cal_XS-dw_1.5	None	None	None	None
164.m02218	CNAG_04246	None	None	None	None	None	None	None	KOG2280	U	Vacuolar assembly/sorting protein VPS16	conserved hypothetical protein	None	None	None	None	None	None	None	None	None	None	None	None	None	None	None	None	None	None	None	None	None	None	None	None	None	None	None	None	None	None	None	None	None	None	None	None	None
164.m02814	CNAG_06191	None	None	None	None	None	None	None	None	None	None	conserved hypothetical protein	None	None	None	None	None	None	None	None	None	None	None	None	None	None	None	None	None	None	None	None	None	None	None	None	None	None	None	None	None	None	None	None	None	None	None	None	None
164.m02825	CNAG_06048	None	None	SPAC227.06	None	orf19.4922	ca3594	IPF6076	KOG3114	S	Uncharacterized conserved protein	conserved hypothetical protein	None	Rab GTPase binding (predicted)	unknown function	None	None	None	None	None	None	None	None	None	None	None	None	None	None	None	None	None	None	None	None	None	None	None	None	None	None	None	None	None	None	None	None	None	None
167.m03169	CNAG_02549	None	None	None	None	None	None	None	KOG2517	G	Ribulose kinase and related carbohydrate kinases	conserved hypothetical protein	None	None	None	None	None	None	None	None	None	None	None	None	None	None	None	None	None	None	None	None	None	None	None	None	None	None	None	None	None	None	None	None	None	None	None	None	None
167.m03203	None	None	None	None	None	None	None	None	None	None	None	None	None	None	None	None	None	None	None	None	None	None	None	None	None	None	None	None	None	None	None	None	None	None	None	None	None	None	None	None	None	None	None	None	None	None	None	None	None
167.m03228	CNAG_02489	None	None	SPCC13B11.01	adh1	None	None	None	KOG0023	Q	Alcohol dehydrogenase, class V	mannitol-1-phosphate dehydrogenase	None	alcohol dehydrogenase Adh1	None	None	None	None	None	None	None	None	None	None	None	None	Spo_XS-dw_2.0	None	Spo_Cd-dw_2.0	None	None	None	None	None	None	None	None	None	None	None	None	None	None	None	None	None	None	None	None
167.m03269	CNAG_02444	YJR008W	None	SPAC4H3.04c	None	orf19.7210	ca5336	IPF893	KOG3086	R	Predicted dioxygenase	UPF0103 protein	None	UPF0103 family	unknown function	Sce_OS-up_2.0	None	Sce_XS-up_2.0	None	Sce_HS-up_2.0	None	Sce_CSR-up_2.0	None	None	None	Spo_XS-up_2.0	None	None	None	None	None	None	None	None	None	None	None	None	None	None	None	None	None	None	None	None	None	None	None
167.m03404	CNAG_07635	YIL144W	TID3	SPBC11C11.03	ndc80	orf19.2827	ca0770	IPF10963	KOG0995	D	Centromere-associated protein HEC1	conserved hypothetical protein	Component of the evolutionarily conserved kinetochore-associated Ndc80 complex (Ndc80p-Nuf2p-Spc24p-Spc25p); conserved coiled-coil protein involved in chromosome segregation, spindle checkpoint activity, kinetochore assembly and clustering	spindle pole body protein Ndc80	unknown	Sce_OS-up_2.0	None	None	None	None	None	None	None	None	None	None	None	None	None	None	None	None	None	None	None	None	None	None	None	None	None	None	None	None	None	None	None	None	None
167.m03503	CNAG_02180	YNR013C	PHO91	SPBC3B8.04c	None	orf19.3663	ca0926	IPF11335	KOG1281	P	Na+/dicarboxylate, Na+/tricarboxylate and phosphate transporters	phosphate transporter	Low-affinity phosphate transporter of the vacuolar membrane; deletion of pho84, pho87, pho89, pho90, and pho91 causes synthetic lethality; transcription independent of Pi and Pho4p activity; overexpression results in vigorous growth	membrane transporter	Member of the phosphate permease family (by homology)	None	None	None	None	None	None	None	None	None	None	None	None	None	None	None	None	None	None	None	None	None	None	None	None	None	None	None	None	None	None	None	None	None	None
167.m03566	CNAG_02111	YOR250C	CLP1	SPAC22H10.05c	None	orf19.6931	ca4703	CLP1	KOG2749	A	mRNA cleavage and polyadenylation factor IA/II complex, subunit CLP1	conserved hypothetical protein	Subunit of cleavage factor I (CFI), involved in both the endonucleolyitc cleavage and polyadenylation steps of mRNA 3'-end maturation	mRNA cleavage and polyadenylation specificity factor complex subunit (predicted)	probable cleaveage/polyadenylation factor	None	None	None	None	None	None	None	None	None	None	None	None	None	None	None	None	None	None	None	None	None	None	None	None	None	None	None	None	None	None	None	None	None	None
167.m03586	CNAG_02089	None	None	None	None	None	None	None	KOG4177	M	Ankyrin	conserved hypothetical protein	None	None	None	None	None	None	None	None	None	None	None	None	None	None	None	None	None	None	None	None	None	None	None	None	None	None	None	None	None	None	None	None	None	None	None	None	None
167.m03590	CNAG_02084	YJL167W	ERG20	SPAC6F12.13c	fps1	orf19.4491	ca1442	ERG20	KOG0711	H	Polyprenyl synthetase	farnesyl pyrophosphate synthetase	Farnesyl pyrophosphate synthetase, has both dimethylallyltranstransferase and geranyltranstransferase activities; catalyzes the formation of C15 farnesyl pyrophosphate units for isoprenoid and sterol biosynthesis	geranyltranstransferase Fps1	farnesyl-pyrophosphate synthetase	None	None	None	None	None	None	None	None	None	None	None	None	None	None	None	None	None	None	None	None	None	None	None	None	None	None	None	None	None	None	None	None	None	None
167.m03643	CNAG_02024	None	None	None	None	None	None	None	None	None	None	conserved hypothetical protein	None	None	None	None	None	None	None	None	None	None	None	None	None	None	None	None	None	None	None	None	None	None	None	None	None	None	None	None	None	None	None	None	None	None	None	None	None
167.m03648	CNAG_02020	YGR002C	SWC4	SPAC9G1.13c	None	orf19.7492	ca5838	IPF424	KOG2656	BK	DNA methyltransferase 1-associated protein-1	SWR1-complex protein 4	Component of the Swr1p complex that incorporates Htz1p into chromatin; component of the NuA4 histone acetyltransferase complex	histone acetyltransferase complex subunit Swc4 (predicted)	unknown function	None	None	None	None	None	None	None	None	None	None	None	None	None	None	None	None	None	None	None	None	None	None	None	None	None	None	None	None	None	None	None	None	None	None
167.m03669	None	None	None	None	None	None	None	None	None	None	None	None	None	None	None	None	None	None	None	None	None	None	None	None	None	None	None	None	None	None	None	None	None	None	None	None	None	None	None	None	None	None	None	None	None	None	None	None	None
167.m03678	None	None	None	None	None	None	None	None	None	None	None	None	None	None	None	None	None	None	None	None	None	None	None	None	None	None	None	None	None	None	None	None	None	None	None	None	None	None	None	None	None	None	None	None	None	None	None	None	None
167.m05833	CNAG_02071	YNL233W	BNI4	None	None	orf19.4457	ca1366	IPF11847	None	None	None	conserved hypothetical protein	Targeting subunit for Glc7p protein phosphatase, localized to the bud neck, required for localization of chitin synthase III to the bud neck via interaction with the chitin synthase III regulatory subunit Skt5p	None	unknown function	None	None	None	None	None	None	None	None	None	None	None	None	None	None	None	None	None	None	None	None	None	None	None	None	None	None	None	None	None	None	None	None	None	None
167.m05840	CNAG_02135	None	None	None	None	None	None	None	None	None	None	conserved hypothetical protein	None	None	None	None	None	None	None	None	None	None	None	None	None	None	None	None	None	None	None	None	None	None	None	None	None	None	None	None	None	None	None	None	None	None	None	None	None
167.m05878	CNAG_02218	None	None	None	None	None	None	None	None	None	None	conserved hypothetical protein	None	None	None	None	None	None	None	None	None	None	None	None	None	None	None	None	None	None	None	None	None	None	None	None	None	None	None	None	None	None	None	None	None	None	None	None	None
167.m05882	CNAG_02234	YLR448W	RPL6B	SPCC622.18	rpl6	orf19.3003.1	ca3123	RPL6	KOG1694	J	60s ribosomal protein L6	60S ribosomal protein L6	Protein component of the large (60S) ribosomal subunit, has similarity to Rpl6Ap and to rat L6 ribosomal protein; binds to 5.8S rRNA	60S ribosomal protein L6	ribosomal protein	None	Sce_OS-dw_2.0	None	Sce_XS-dw_2.0	None	Sce_HS-dw_2.0	None	Sce_CSR-dw_2.0	None	None	None	Spo_XS-dw_2.0	None	None	None	None	None	None	None	None	None	Cal_HS-dw	None	Cal_SSR.HS-dw	None	None	None	None	None	None	None	None	None	None
167.m05899	CNAG_02263	None	None	None	None	None	None	None	KOG1870	O	Ubiquitin C-terminal hydrolase	conserved hypothetical protein	None	None	None	None	None	None	None	None	None	None	None	None	None	None	None	None	None	None	None	None	None	None	None	None	None	None	None	None	None	None	None	None	None	None	None	None	None
167.m05981	CNAG_02061	None	None	None	None	None	None	None	None	None	None	conserved hypothetical protein	None	None	None	None	None	None	None	None	None	None	None	None	None	None	None	None	None	None	None	None	None	None	None	None	None	None	None	None	None	None	None	None	None	None	None	None	None
176.m02142	None	None	None	None	None	None	None	None	None	None	None	None	None	None	None	None	None	None	None	None	None	None	None	None	None	None	None	None	None	None	None	None	None	None	None	None	None	None	None	None	None	None	None	None	None	None	None	None	None
176.m02143	CNAG_06924	YIL162W	SUC2	SPAC8E11.01c	None	None	None	None	KOG0228	G	Beta-fructofuranosidase (invertase)	beta-fructofuranosidase	Invertase, sucrose hydrolyzing enzyme; a secreted, glycosylated form is regulated by glucose repression, and an intracellular, nonglycosylated enzyme is produced constitutively	beta-fructofuranosidase-like protein	None	Sce_OS-up_2.0	None	None	None	Sce_HS-up_2.0	None	None	None	None	None	None	None	None	None	None	None	None	None	None	None	None	None	None	None	None	None	None	None	None	None	None	None	None	None
176.m02232	CNAG_02605	YOR070C	GYP1	SPBC530.01	gyp1	orf19.3811	ca4843	GYP1	KOG1092	U	Ypt/Rab-specific GTPase-activating protein GYP1	tbc1 domain family protein	Cis-golgi GTPase-activating protein (GAP) for the Rab family members Ypt1p (in vivo) and for Ypt1p, Sec4p, Ypt7p, and Ypt51p (in vitro); involved in vesicle docking and fusion	GTPase activating protein Gyp1 (predicted)	GTPase activating protein (by homology)	None	None	None	None	Sce_HS-up_2.0	None	None	None	None	None	None	None	None	None	None	None	None	None	None	None	None	None	None	None	None	None	None	None	None	None	None	None	None	None
176.m02235	CNAG_02609	YOL096C	COQ3	SPCC162.05	coq3	orf19.3400	ca2432	COQ3	KOG1270	H	Methyltransferases	hexaprenyldihydroxybenzoate methyltransferase	O-methyltransferase, catalyzes two different O-methylation steps in ubiquinone (Coenzyme Q) biosynthesis; component of a mitochondrial ubiquinone-synthesizing complex	hexaprenyldihydroxybenzoate methyltransferase	3,4-dihydroxy-5-hexaprenylbenzoatemethyltransferase	None	None	None	None	Sce_HS-up_2.0	None	None	None	None	None	None	None	None	None	None	None	None	None	None	None	None	None	None	None	None	None	None	None	None	None	None	None	None	None
176.m02237	CNAG_07571	None	None	None	None	None	None	None	None	None	None	conserved hypothetical protein	None	None	None	None	None	None	None	None	None	None	None	None	None	None	None	None	None	None	None	None	None	None	None	None	None	None	None	None	None	None	None	None	None	None	None	None	None
176.m02273	CNAG_07537	YMR097C	MTG1	SPBC25B2.04c	None	orf19.2384	ca2101	IPF9364	KOG2485	R	Conserved ATP/GTP binding protein	mitochondrial GTPase 1	Peripheral GTPase of the mitochondrial inner membrane, essential for respiratory competence, likely functions in assembly of the large ribosomal subunit, has homologs in plants and animals	mitochondrial ribosome assembly protein	unknown function	None	None	Sce_XS-up_2.0	None	None	None	None	None	None	None	None	None	None	None	None	None	None	None	None	None	None	None	None	None	None	None	None	None	None	None	None	None	None	None
176.m02277	CNAG_07533	None	None	None	None	None	None	None	None	None	None	conserved hypothetical protein	None	None	None	None	None	None	None	None	None	None	None	None	None	None	None	None	None	None	None	None	None	None	None	None	None	None	None	None	None	None	None	None	None	None	None	None	None
176.m02299	CNAG_02673	None	None	None	None	None	None	None	KOG1502	V	Flavonol reductase/cinnamoyl-CoA reductase	NAD dependent epimerase/dehydratase family protein	None	None	None	None	None	None	None	None	None	None	None	None	None	None	None	None	None	None	None	None	None	None	None	None	None	None	None	None	None	None	None	None	None	None	None	None	None
176.m02301	None	None	None	None	None	None	None	None	None	None	None	None	None	None	None	None	None	None	None	None	None	None	None	None	None	None	None	None	None	None	None	None	None	None	None	None	None	None	None	None	None	None	None	None	None	None	None	None	None
176.m02302	CNAG_02676	None	None	None	None	None	None	None	None	None	None	conserved hypothetical protein	None	None	None	None	None	None	None	None	None	None	None	None	None	None	None	None	None	None	None	None	None	None	None	None	None	None	None	None	None	None	None	None	None	None	None	None	None
176.m02313	CNAG_02687	None	None	None	None	None	None	None	KOG3417	T	Ras1 guanine nucleotide exchange factor	conserved hypothetical protein	None	None	None	None	None	None	None	None	None	None	None	None	None	None	None	None	None	None	None	None	None	None	None	None	None	None	None	None	None	None	None	None	None	None	None	None	None
176.m02319	CNAG_02693	None	None	None	None	orf19.4583	ca5146	YMC2	KOG0758	C	Mitochondrial carnitine-acylcarnitine carrier protein	conserved hypothetical protein	None	None	Carnitine/acylcarnitine translocase (by homology)	None	None	None	None	None	None	None	None	None	None	None	None	None	None	None	None	None	None	None	None	None	None	None	None	None	None	None	None	None	None	None	None	None	None
176.m02382	CNAG_01906	YOL009C	MDM12	SPBC28F2.06c	mdm12	orf19.6900	ca4582	MDM12	None	None	None	mitochondrial inheritance component mdm12	Mitochondrial outer membrane protein, required for transmission of mitochondria to daughter cells; component of the Mdm10-Mdm12-Mmm1 complex involved in import and assembly of outer membrane beta-barrel proteins	Mdm10/Mdm12/Mmm1 complex subunit Mdm12	Involved in mitochondrial inheritance (by homology)	None	None	None	Sce_XS-dw_2.0	Sce_HS-up_2.0	None	None	None	None	None	None	Spo_XS-dw_2.0	None	None	None	None	None	Cal_OS-dw	None	None	None	None	None	Cal_SSR.OS-dw	None	None	None	None	None	None	None	None	None	None
176.m02388	CNAG_01912	YHR074W	QNS1	SPCC553.02	None	orf19.1460	ca4542	IPF6255	KOG2303	HR	Predicted NAD synthase, contains CN hydrolase domain	glutamine-dependent NAD(+) synthetase synthase	Glutamine-dependent NAD(+) synthetase, essential for the formation of NAD(+) from nicotinic acid adenine dinucleotide	glutamine-dependent NAD(+) synthetase (predicted)	unknown function	None	None	None	None	None	None	None	None	None	None	None	None	None	None	None	None	None	None	None	None	None	None	None	None	None	None	None	None	None	None	None	None	None	None
176.m02393	CNAG_01916	YDR097C	MSH6	SPCC285.16c	msh6	orf19.4945	ca3705	MSH6	KOG0217	L	Mismatch repair ATPase MSH6 (MutS family)	DNA mismatch repair protein msh6	Protein required for mismatch repair in mitosis and meiosis, forms a complex with Msh2p to repair both single-base & insertion-deletion mispairs; potentially phosphorylated by Cdc28p	MutS protein homolog	DNA mismatch repair protein by homology	None	Sce_OS-dw_2.0	None	Sce_XS-dw_2.0	None	Sce_HS-dw_2.0	None	Sce_CSR-dw_2.0	None	None	None	None	None	None	None	None	None	None	None	None	None	None	None	None	None	None	None	None	None	Cal_XS-dw_1.5	None	None	None	None
176.m02396	CNAG_01920	YLL039C	UBI4	SPBC337.08c	ubi4	orf19.6771	ca5932	UBI4	KOG0001	OR	Ubiquitin and ubiquitin-like proteins	polyubiquitin	Ubiquitin, becomes conjugated to proteins, marking them for selective degradation via the ubiquitin-26S proteasome system; essential for the cellular stress response; encoded as a polyubiquitin precursor comprised of 5 head-to-tail repeats	ubiquitin	Polyubiquitin	Sce_OS-up_2.0	None	Sce_XS-up_2.0	None	Sce_HS-up_2.0	None	Sce_CSR-up_2.0	None	None	None	Spo_XS-up_2.0	None	None	None	None	None	None	None	None	None	None	None	None	None	None	None	None	None	None	None	None	None	None	None
176.m02407	CNAG_01936	None	None	None	None	None	None	None	KOG0254	R	Predicted transporter (major facilitator superfamily)	sugar transporter	None	None	None	None	None	None	None	None	None	None	None	None	None	None	None	None	None	None	None	None	None	None	None	None	None	None	None	None	None	None	None	None	None	None	None	None	None
176.m02429	CNAG_01957	YFR050C	PRE4	SPBC577.10	None	orf19.4230	ca4142	PRE4	KOG0185	O	20S proteasome, regulatory subunit beta type PSMB4/PRE4	endopeptidase	Beta 7 subunit of the 20S proteasome	20S proteasome component beta 7	20S proteasome subunit(beta7) (by homology)	None	None	None	None	None	None	None	None	None	None	None	None	None	None	None	None	None	None	None	None	None	None	None	None	None	None	None	None	None	None	None	None	None	None
176.m02431	CNAG_01959	YLR272C	YCS4	SPBC776.13	cnd1	orf19.1883	ca4482	IPF9154	KOG0414	BD	Chromosome condensation complex Condensin, subunit D2	condensin	Non-SMC subunit of the condensin complex (Smc2p-Smc4p-Ycs4p-Brn1p-Ycg1p); required for establishment and maintenance of chromosome condensation, chromosome segregation, chromatin binding of condensin and silencing at the mating type locus	condensin subunit Cnd1	similar to Saccharomyces cerevisiae Ycs4p subunit of condensin protein complex (by homology)	None	None	None	None	None	None	None	None	None	None	None	None	None	None	None	None	None	None	None	None	None	None	None	None	None	None	None	None	None	None	None	None	None	None
176.m02434	CNAG_01962	YDR204W	COQ4	SPAC1687.12c	coq4	orf19.3008	ca3118	COQ4	KOG3244	H	Protein involved in ubiquinone biosynthesis	COQ4	Protein with a role in ubiquinone (Coenzyme Q) biosynthesis, possibly functioning in stabilization of Coq7p; located on the matrix face of the mitochondrial inner membrane; component of a mitochondrial ubiquinone-synthesizing complex	ubiquinone biosynthesis protein Coq4 (predicted)	ubiquinone biosynthesis	None	None	Sce_XS-up_2.0	None	Sce_HS-up_2.0	None	None	None	None	None	None	None	None	None	None	None	None	None	None	None	None	None	None	None	None	None	None	None	None	None	None	None	None	None
176.m02436	CNAG_01964	YJL212C	OPT1	SPAC29B12.10c	None	None	None	None	KOG2262	T	Sexual differentiation process protein ISP4	oligopeptide transporter	Proton-coupled oligopeptide transporter of the plasma membrane; also transports glutathione and phytochelatin; member of the OPT family	OPT oligopeptide transporter family	None	None	None	Sce_XS-up_2.0	None	None	Sce_HS-dw_2.0	None	None	None	Spo_OS-dw_2.0	None	None	Spo_Cd-up_2.0	None	None	None	None	None	None	None	None	None	None	None	None	None	None	None	None	None	None	None	None	None
176.m02461	CNAG_02001	None	None	None	None	None	None	None	KOG0565	U	Inositol polyphosphate 5-phosphatase and related proteins	inositol-polyphosphate 5-phosphatase	None	None	None	None	None	None	None	None	None	None	None	None	None	None	None	None	None	None	None	None	None	None	None	None	None	None	None	None	None	None	None	None	None	None	None	None	None
176.m02470	CNAG_02010	None	None	None	None	None	None	None	KOG2533	G	Permease of the major facilitator superfamily	tartrate transporter	None	None	None	None	None	None	None	None	None	None	None	None	None	None	None	None	None	None	None	None	None	None	None	None	None	None	None	None	None	None	None	None	None	None	None	None	None
176.m02512	CNAG_02585	None	None	None	None	None	None	None	None	None	None	RfeF	None	None	None	None	None	None	None	None	None	None	None	None	None	None	None	None	None	None	None	None	None	None	None	None	None	None	None	None	None	None	None	None	None	None	None	None	None
176.m02518	CNAG_07545	None	None	None	None	None	None	None	None	None	None	nuclear protein	None	None	None	None	None	None	None	None	None	None	None	None	None	None	None	None	None	None	None	None	None	None	None	None	None	None	None	None	None	None	None	None	None	None	None	None	None
176.m02567	CNAG_01991	YNL052W	COX5A	SPCC338.10c	cox5	orf19.4759	ca2630	COX5A	KOG4075	C	Cytochrome c oxidase, subunit IV/COX5b	cytochrome c oxidase subunit V	Subunit Va of cytochrome c oxidase, which is the terminal member of the mitochondrial inner membrane electron transport chain; predominantly expressed during aerobic growth while its isoform Vb (Cox5Bp) is expressed during anaerobic growth	cytochrome c oxidase subunit V	cytochrome-c oxidase chain V.A precursor (by homology)	None	None	None	Sce_XS-dw_2.0	None	None	None	None	None	None	None	None	None	None	None	None	None	None	None	None	None	None	None	None	None	None	None	None	None	None	None	None	None	None
176.m02568	CNAG_01988	YIL147C	SLN1	None	None	None	None	None	KOG0519	T	Sensory transduction histidine kinase	bacteriophytochrome histidine kinase	Histidine kinase osmosensor that regulates a MAP kinase cascade; transmembrane protein with an intracellular kinase domain that signals to Ypd1p and Ssk1p, thereby forming a phosphorelay system similar to bacterial two-component regulators	None	None	None	None	None	Sce_XS-dw_2.0	None	None	None	None	None	None	None	None	None	None	None	None	None	None	None	None	None	None	None	None	None	None	None	None	None	None	None	None	None	None
176.m02573	CNAG_07556	None	None	None	None	None	None	None	KOG3736	O	Polypeptide N-acetylgalactosaminyltransferase	conserved hypothetical protein	None	None	None	None	None	None	None	None	None	None	None	None	None	None	None	None	None	None	None	None	None	None	None	None	None	None	None	None	None	None	None	None	None	None	None	None	None
177.m02858	CNAG_06968	None	None	None	None	None	None	None	KOG1808	R	AAA ATPase containing von Willebrand factor type A (vWA) domain	hypothetical protein	None	None	None	None	None	None	None	None	None	None	None	None	None	None	None	None	None	None	None	None	None	None	None	None	None	None	None	None	None	None	None	None	None	None	None	None	None
177.m02862	CNAG_07752	None	None	None	None	None	None	None	None	None	None	UDP-galactopyranose mutase	None	None	None	None	None	None	None	None	None	None	None	None	None	None	None	None	None	None	None	None	None	None	None	None	None	None	None	None	None	None	None	None	None	None	None	None	None
177.m02887	CNAG_03572	None	None	None	None	None	None	None	None	None	None	opsin 1	None	None	None	None	None	None	None	None	None	None	None	None	None	None	None	None	None	None	None	None	None	None	None	None	None	None	None	None	None	None	None	None	None	None	None	None	None
177.m02900	CNAG_03554	YDL145C	COP1	SPBPJ4664.04	None	orf19.1672	ca0606	COP1	KOG0292	U	Vesicle coat complex COPI, alpha subunit	coatomer alpha subunit	Alpha subunit of COPI vesicle coatomer complex, which surrounds transport vesicles in the early secretory pathway	coatomer alpha subunit (predicted)	coatomer complex alpha chain of secretory pathway vesicles (by homology)	None	None	None	None	None	None	None	None	None	None	None	None	None	None	None	None	None	None	None	None	None	None	None	None	None	None	None	None	None	None	None	None	None	None
177.m02912	CNAG_07745	YMR083W	ADH3	None	None	orf19.3997	ca4765	ADH1	KOG0023	Q	Alcohol dehydrogenase, class V	mannitol-1-phosphate dehydrogenase	Mitochondrial alcohol dehydrogenase isozyme III; involved in the shuttling of mitochondrial NADH to the cytosol under anaerobic conditions and ethanol production	None	alcohol dehydrogenase (by homology)	None	None	None	None	None	None	None	None	None	None	None	None	None	None	None	None	None	None	None	Cal_XS-dw	None	None	None	Cal_SSR.XS-dw	None	None	None	None	None	None	None	None	None	None
177.m02933	None	None	None	None	None	None	None	None	None	None	None	None	None	None	None	None	None	None	None	None	None	None	None	None	None	None	None	None	None	None	None	None	None	None	None	None	None	None	None	None	None	None	None	None	None	None	None	None	None
177.m02948	CNAG_03494	None	None	None	None	None	None	None	KOG2242	A	Scaffold/matrix specific factor hnRNP-U/SAF-A, contains SPRY domain	conserved hypothetical protein	None	None	None	None	None	None	None	None	None	None	None	None	None	None	None	None	None	None	None	None	None	None	None	None	None	None	None	None	None	None	None	None	None	None	None	None	None
177.m02953	CNAG_03489	None	None	SPAC22E12.02	None	orf19.444	ca4066	IPF5925	KOG0226	R	RNA-binding proteins	RNA recognition domain-containing protein (RRM)-containing protein	None	RNA-binding protein	RNA-binding protein (by homology)	None	None	None	None	None	None	None	None	None	None	None	None	None	None	None	None	None	None	None	None	None	None	None	None	None	None	None	None	None	None	None	None	None	None
177.m02985	CNAG_03452	YEL052W	AFG1	SPBC115.02c	None	orf19.2891	ca3775	AFG1	KOG2383	R	Predicted ATPase	AFG1 family mitochondrial ATPase	Conserved protein that may act as a chaperone in the degradation of misfolded or unassembled cytochrome c oxidase subunits; localized to matrix face of the mitochondrial inner membrane; member of the AAA family but lacks a protease domain	AFG1 family mitochondrial ATPase	ATPase family gene (by homology)	None	None	None	None	None	None	None	None	None	None	None	None	None	None	None	None	None	None	None	None	None	None	None	None	None	None	None	None	None	None	None	None	None	None
177.m02988	CNAG_03449	YMR201C	RAD14	SPBC649.03	rhp14	orf19.6517	ca4958	RAD14	KOG4017	L	DNA excision repair protein XPA/XPAC/RAD14	hydrophilic protein	Protein that recognizes and binds damaged DNA during nucleotide excision repair; subunit of Nucleotide Excision Repair Factor 1 (NEF1); contains zinc finger motif; homolog of human XPA protein	XP-A family homolog Rhp14	nucleotide excision repair protein (by homology)	None	None	None	None	Sce_HS-up_2.0	None	None	None	None	None	Spo_XS-up_2.0	None	Spo_Cd-up_2.0	None	None	None	None	None	None	None	None	None	None	None	None	None	None	None	None	None	None	None	None	None
177.m02990	CNAG_03447	None	None	None	None	None	None	None	None	None	None	conserved hypothetical protein	None	None	None	None	None	None	None	None	None	None	None	None	None	None	None	None	None	None	None	None	None	None	None	None	None	None	None	None	None	None	None	None	None	None	None	None	None
177.m02994	CNAG_03441	None	None	None	None	None	None	None	None	None	None	conserved hypothetical protein	None	None	None	None	None	None	None	None	None	None	None	None	None	None	None	None	None	None	None	None	None	None	None	None	None	None	None	None	None	None	None	None	None	None	None	None	None
177.m03088	CNAG_03332	YOL094C	RFC4	SPAC1687.03c	rfc4	orf19.7658	ca6043	RFC4	KOG0991	L	Replication factor C, subunit RFC2	activator 1 40 kDa subunit	Subunit of heteropentameric Replication factor C (RF-C), which is a DNA binding protein and ATPase that acts as a clamp loader of the proliferating cell nuclear antigen (PCNA) processivity factor for DNA polymerases delta and epsilon	DNA replication factor C complex subunit Rfc4 (predicted)	DNA replication factor C (by homology)	None	None	None	None	None	Sce_HS-dw_2.0	None	None	None	None	None	None	None	None	None	None	None	None	None	None	None	None	None	None	None	None	None	None	None	None	None	None	None	None
177.m03094	CNAG_03325	YOR299W	BUD7	SPBC31F10.16	None	orf19.1112	ca1805	IPF6332	None	None	None	ChAPs family protein	Member of the ChAPs family of proteins (Chs5p-Arf1p-binding proteins: Bch1p, Bch2p, Bud7p, Chs6p), that forms the exomer complex with Chs5p to mediate export of specific cargo proteins, including Chs3p, from the Golgi to the plasma membrane	ChAPs family protein	similar to Saccharomyces cerevisiae Bud7p chitin biosynthesis protein involved in bud site selection (by homology)	None	None	None	None	None	None	None	None	None	None	None	None	None	None	None	None	None	None	None	None	None	None	None	None	None	None	None	None	None	None	None	None	None	None
177.m03097	CNAG_03322	None	None	SPBPB2B2.11	None	orf19.3674	ca4043	IPF5291	KOG1429	GM	dTDP-glucose 4-6-dehydratase/UDP-glucuronic acid decarboxylase	UDP-xylose synthase	None	nucleotide-sugar 4,6-dehydratase (predicted)	UDP-glucose 4-epimerase (by homology)	None	None	None	None	None	None	None	None	None	None	Spo_XS-up_2.0	None	None	None	None	None	None	None	None	None	None	None	None	None	None	None	None	None	None	None	None	None	None	None
177.m03154	CNAG_03261	None	None	None	None	None	None	None	KOG2893	R	Zn finger protein	zinc finger protein 207	None	None	None	None	None	None	None	None	None	None	None	None	None	None	None	None	None	None	None	None	None	None	None	None	None	None	None	None	None	None	None	None	None	None	None	None	None
177.m03163	CNAG_03249	YDR381W	YRA1	SPBC1D7.04	mlo3	orf19.5917.3	None	None	KOG0533	A	RRM motif-containing protein	conserved hypothetical protein	Nuclear protein that binds to RNA and to Mex67p, required for export of poly(A)+ mRNA from the nucleus; member of the REF (RNA and export factor binding proteins) family; another family member, Yra2p, can substitute for Yra1p function	RNA annealing factor Mlo3	None	None	None	None	None	None	Sce_HS-dw_2.0	None	None	None	None	None	None	None	None	None	None	None	None	None	None	None	None	None	None	None	None	None	None	None	None	None	None	None	None
177.m03164	CNAG_03248	YOR134W	BAG7	SPBC17F3.01c	rga5	orf19.7115	ca5584	SAC7	KOG2710	TZ	Rho GTPase-activating protein	rho GTPase activator	Rho GTPase activating protein (RhoGAP), stimulates the intrinsic GTPase activity of Rho1p, which plays a role in actin cytoskeleton organization and control of cell wall synthesis; structurally and functionally related to Sac7p	GTPase activating protein Rga5	GAP for RHO1 by homology	Sce_OS-up_2.0	None	Sce_XS-up_2.0	None	Sce_HS-up_2.0	None	Sce_CSR-up_2.0	None	None	None	None	None	None	None	None	None	None	None	None	None	None	Cal_HS-dw	None	Cal_SSR.HS-dw	None	None	None	None	None	None	None	None	None	None
177.m03172	CNAG_03240	None	None	None	None	None	None	None	KOG2431	G	1, 2-alpha-mannosidase	mannosyl-oligosaccharide 1,2-alpha-mannosidase	None	None	None	None	None	None	None	None	None	None	None	None	None	None	None	None	None	None	None	None	None	None	None	None	None	None	None	None	None	None	None	None	None	None	None	None	None
177.m03188	CNAG_03226	YLL041C	SDH2	SPAC140.01	sdh2	orf19.637	ca1845	IPF11123	KOG3049	C	Succinate dehydrogenase, Fe-S protein subunit	succinate dehydrogenase iron-sulfur subunit	Iron-sulfur protein subunit of succinate dehydrogenase (Sdh1p, Sdh2p, Sdh3p, Sdh4p), which couples the oxidation of succinate to the transfer of electrons to ubiquinone	succinate dehydrogenase (ubiquinone) iron-sulfur protein subunit	similar to Saccharomyces cerevisiae Sdh2p succinate dehydrogenase iron-sulfur protein subunit (by homology)	None	None	None	None	Sce_HS-up_2.0	None	None	None	None	None	None	Spo_XS-dw_2.0	None	None	None	None	None	None	None	None	None	None	None	None	None	None	None	None	None	None	None	None	None	None
177.m03198	CNAG_03215	YIL121W	QDR2	None	None	None	None	None	KOG0255	R	Synaptic vesicle transporter SVOP and related transporters (major facilitator superfamily)	Aqr1p	Multidrug transporter of the major facilitator superfamily, required for resistance to quinidine, barban, cisplatin, and bleomycin; may have a role in potassium uptake	None	None	None	None	None	None	None	Sce_HS-dw_2.0	None	None	None	None	None	None	None	None	None	None	None	None	None	None	None	None	None	None	None	None	None	None	None	None	None	None	None	None
177.m03200	CNAG_03213	None	None	SPBC19C7.09c	uve1	None	None	None	None	None	None	UV-endonuclease UVE-1	None	endonuclease Uve1	None	None	None	None	None	None	None	None	None	None	None	Spo_XS-up_2.0	None	None	None	None	None	None	None	None	None	None	None	None	None	None	None	None	None	None	None	None	None	None	None
177.m03203	CNAG_07718	YIR006C	PAN1	SPAC25G10.09c	None	orf19.886	ca4682	IPF3687	KOG4305	T	RhoGEF GTPase	multidomain RhoGEF	Part of actin cytoskeleton-regulatory complex Pan1p-Sla1p-End3p, associates with actin patches on the cell cortex; promotes protein-protein interactions essential for endocytosis; previously thought to be a subunit of poly(A) ribonuclease	actin cortical patch component, with EF hand and WH2 motif (predicted)	similar to Saccharomyces cerevisiae Pan1p actin-cytoskeleton assembly protein (by homology)	None	None	None	None	None	None	None	None	None	None	None	None	None	None	None	None	None	None	None	None	None	None	None	None	None	None	None	None	None	None	None	None	None	None
177.m03209	CNAG_07716	None	None	None	None	None	None	None	KOG1117	TZ	Rho- and Arf-GTPase activating protein ARAP3	conserved hypothetical protein	None	None	None	None	None	None	None	None	None	None	None	None	None	None	None	None	None	None	None	None	None	None	None	None	None	None	None	None	None	None	None	None	None	None	None	None	None
177.m03216	CNAG_03190	YAL021C	CCR4	SPCC31H12.08c	ccr4	orf19.5101	ca2222	CCR4	KOG0620	K	Glucose-repressible alcohol dehydrogenase transcriptional effector CCR4 and related proteins	glucose-repressible alcohol dehydrogenase transcriptional effector	Component of the CCR4-NOT transcriptional complex, which is involved in regulation of gene expression; component of the major cytoplasmic deadenylase, which is involved in mRNA poly(A) tail shortening	CCR4-Not complex subunit Ccr4 (predicted)	glucose-repressible alcohol dehydrogenase transcriptional effector	None	None	None	None	None	None	None	None	None	None	None	None	None	None	None	None	None	None	None	None	None	None	None	None	None	None	None	None	None	None	None	None	None	None
177.m03217	CNAG_03189	YPR089W	None	SPAC25B8.08	None	orf19.757	ca0049	IPF3908	None	None	None	DIL and Ankyrin domain-containing protein	None	conserved fungal family	unknown function	None	None	None	None	None	None	None	None	None	None	Spo_XS-up_2.0	None	None	None	None	None	None	None	None	None	None	None	None	None	None	None	None	None	None	Cal_XS-dw_1.5	None	None	None	None
177.m03224	CNAG_03182	None	None	None	None	None	None	None	KOG3263	R	Nucleic acid binding protein	conserved hypothetical protein	None	None	None	None	None	None	None	None	None	None	None	None	None	None	None	None	None	None	None	None	None	None	None	None	None	None	None	None	None	None	None	None	None	None	None	None	None
177.m03226	CNAG_07715	None	None	None	None	None	None	None	KOG1142	K	Transcription initiation factor TFIID, subunit TAF12 (also component of histone acetyltransferase SAGA)	conserved hypothetical protein	None	None	None	None	None	None	None	None	None	None	None	None	None	None	None	None	None	None	None	None	None	None	None	None	None	None	None	None	None	None	None	None	None	None	None	None	None
177.m03264	CNAG_03143	YFL014W	HSP12	None	None	orf19.3160	ca0627	HSP12	None	None	None	conserved hypothetical protein	Plasma membrane localized protein that protects membranes from desiccation; induced by heat shock, oxidative stress, osmostress, stationary phase entry, glucose depletion, oleate and alcohol; regulated by the HOG and Ras-Pka pathways	None	Heat shock protein (by homology)	Sce_OS-up_2.0	None	Sce_XS-up_2.0	None	Sce_HS-up_2.0	None	Sce_CSR-up_2.0	None	None	None	None	None	None	None	None	None	None	None	None	None	None	None	None	None	Cal_OS-up_1.5	None	Cal_OS-up_2.0	None	None	None	None	None	Cal_Cd-up_1.5	None
177.m03265	CNAG_03142	None	None	None	None	None	None	None	None	None	None	conserved hypothetical protein	None	None	None	None	None	None	None	None	None	None	None	None	None	None	None	None	None	None	None	None	None	None	None	None	None	None	None	None	None	None	None	None	None	None	None	None	None
177.m03275	CNAG_03130	None	None	None	None	None	None	None	KOG0393	R	Ras-related small GTPase, Rho type	signal transducer	None	None	None	None	None	None	None	None	None	None	None	None	None	None	None	None	None	None	None	None	None	None	None	None	None	None	None	None	None	None	None	None	None	None	None	None	None
177.m03285	CNAG_03118	None	None	None	None	None	None	None	KOG1994	A	Predicted RNA binding protein, contains G-patch and Zn-finger domains	conserved hypothetical protein	None	None	None	None	None	None	None	None	None	None	None	None	None	None	None	None	None	None	None	None	None	None	None	None	None	None	None	None	None	None	None	None	None	None	None	None	None
177.m03302	CNAG_03099	None	None	None	None	None	None	None	KOG2571	M	Chitin synthase/hyaluronan synthase (glycosyltransferases)	chitin synthase 1	None	None	None	None	None	None	None	None	None	None	None	None	None	None	None	None	None	None	None	None	None	None	None	None	None	None	None	None	None	None	None	None	None	None	None	None	None
177.m03306	None	None	None	None	None	None	None	None	None	None	None	None	None	None	None	None	None	None	None	None	None	None	None	None	None	None	None	None	None	None	None	None	None	None	None	None	None	None	None	None	None	None	None	None	None	None	None	None	None
177.m03313	CNAG_07745	YMR083W	ADH3	None	None	orf19.3997	ca4765	ADH1	KOG0023	Q	Alcohol dehydrogenase, class V	mannitol-1-phosphate dehydrogenase	Mitochondrial alcohol dehydrogenase isozyme III; involved in the shuttling of mitochondrial NADH to the cytosol under anaerobic conditions and ethanol production	None	alcohol dehydrogenase (by homology)	None	None	None	None	None	None	None	None	None	None	None	None	None	None	None	None	None	None	None	Cal_XS-dw	None	None	None	Cal_SSR.XS-dw	None	None	None	None	None	None	None	None	None	None
177.m03315	CNAG_03509	YGR193C	PDX1	SPCC1259.09c	None	orf19.5021	ca5242	PDX1	KOG0557	C	Dihydrolipoamide acetyltransferase	pyruvate dehydrogenase protein X component	Dihydrolipoamide dehydrogenase (E3)-binding protein (E3BP) of the mitochondrial pyruvate dehydrogenase (PDH) complex, plays a structural role in the complex by binding and positioning E3 to the dihydrolipoamide acetyltransferase (E2) core	pyruvate dehydrogenase protein x component	Pyruvate dehydrogenase complex protein X (by homology)	None	None	None	None	None	None	None	None	None	None	None	None	None	None	None	None	None	None	None	None	None	None	None	None	None	None	None	None	None	None	None	None	None	None
177.m03382	CNAG_03465	None	None	None	None	None	None	None	KOG1263	Q	Multicopper oxidases	laccase	None	None	None	None	None	None	None	None	None	None	None	None	None	None	None	None	None	None	None	None	None	None	None	None	None	None	None	None	None	None	None	None	None	None	None	None	None
177.m03399	CNAG_03368	YLR045C	STU2	SPCC895.07	alp14	orf19.6610	ca3849	IPF7938	KOG1820	Z	Microtubule-associated protein	microtubule Associated protein	Microtubule-associated protein (MAP) of the XMAP215/Dis1 family; regulates microtubule dynamics during spindle orientation and metaphase chromosome alignment; interacts with spindle pole body component Spc72p	Mad2-dependent spindle checkpoint component	similar to Saccharomyces cerevisiae Stu2p suppressor of cold-sensitive tubulin mutation (by homology)	None	None	None	Sce_XS-dw_2.0	None	None	None	None	None	None	None	None	None	None	None	None	None	None	None	None	None	None	None	None	None	None	None	None	None	None	None	None	None	None
177.m03402	CNAG_03353	YBR146W	MRPS9	SPAC29A4.03c	None	orf19.5230	ca1109	MRPS9	KOG1697	J	Mitochondrial/chloroplast ribosomal protein S9	conserved hypothetical protein	Mitochondrial ribosomal protein of the small subunit	mitochondrial ribosomal protein subunit S9	ribosomal protein S9 small subunit precursor	None	None	None	None	None	None	None	None	None	None	None	None	None	None	None	None	None	None	None	None	None	None	None	None	None	None	None	None	None	None	None	None	None	None
177.m03471	CNAG_03315	YPR165W	RHO1	SPAC1F7.04	rho1	orf19.2843	ca2866	RHO1	KOG0393	R	Ras-related small GTPase, Rho type	Rho1 GTP-binding protein	GTP-binding protein of the rho subfamily of Ras-like proteins, involved in establishment of cell polarity; regulates protein kinase C (Pkc1p) and the cell wall synthesizing enzyme 1,3-beta-glucan synthase (Fks1p and Gsc2p)	Rho family GTPase Rho1	GTP-binding protein of the rho subfamily of ras-like proteins (by homology)	None	None	None	None	None	None	None	None	None	None	None	None	None	None	None	None	None	None	None	Cal_XS-dw	None	None	None	Cal_SSR.XS-dw	None	None	None	None	None	Cal_XS-dw_1.5	None	None	None	None
179.m00006	CNAG_06963	None	None	None	None	None	None	None	KOG0254	R	Predicted transporter (major facilitator superfamily)	sugar transporter	None	None	None	None	None	None	None	None	None	None	None	None	None	None	None	None	None	None	None	None	None	None	None	None	None	None	None	None	None	None	None	None	None	None	None	None	None
179.m00046	CNAG_03038	None	None	SPAC12B10.13	None	None	None	None	KOG2659	Z	LisH motif-containing protein	conserved hypothetical protein	None	CTLH domain	None	None	None	None	None	None	None	None	None	None	None	None	None	None	None	None	None	None	None	None	None	None	None	None	None	None	None	None	None	None	None	None	None	None	None
179.m00068	CNAG_03012	None	None	None	None	None	None	None	None	None	None	hypothetical protein	None	None	None	None	None	None	None	None	None	None	None	None	None	None	None	None	None	None	None	None	None	None	None	None	None	None	None	None	None	None	None	None	None	None	None	None	None
179.m00069	CNAG_03012	None	None	None	None	None	None	None	None	None	None	hypothetical protein	None	None	None	None	None	None	None	None	None	None	None	None	None	None	None	None	None	None	None	None	None	None	None	None	None	None	None	None	None	None	None	None	None	None	None	None	None
179.m00070	CNAG_03012	None	None	None	None	None	None	None	None	None	None	hypothetical protein	None	None	None	None	None	None	None	None	None	None	None	None	None	None	None	None	None	None	None	None	None	None	None	None	None	None	None	None	None	None	None	None	None	None	None	None	None
179.m00080	CNAG_01499	YIL166C	None	None	None	orf19.6520	ca4956	IPF4583	KOG2533	G	Permease of the major facilitator superfamily	conserved hypothetical protein	None	None	putative allantoate permease (by homology)	None	None	None	None	Sce_HS-up_2.0	None	None	None	None	None	None	None	None	None	None	None	None	None	None	None	None	None	None	None	None	None	None	None	None	None	None	None	Cal_Cd-up_1.5	None
179.m00083	CNAG_01573	None	None	None	None	None	None	None	KOG4364	B	Chromatin assembly factor-I	conserved hypothetical protein	None	None	None	None	None	None	None	None	None	None	None	None	None	None	None	None	None	None	None	None	None	None	None	None	None	None	None	None	None	None	None	None	None	None	None	None	None
179.m00093	CNAG_01583	YLR025W	SNF7	SPAC1142.07c	vps32	orf19.6040	ca4903	SNF7	KOG1656	U	Protein involved in glucose derepression and pre-vacuolar endosome protein sorting	vacuolar-sorting protein SNF7	One of four subunits of the endosomal sorting complex required for transport III (ESCRT-III); involved in the sorting of transmembrane proteins into the multivesicular body (MVB) pathway; recruited from the cytoplasm to endosomal membranes	vacuolar sorting protein Vps32	Class E Vps protein (by homology)	None	None	None	None	None	None	None	None	None	None	None	None	None	None	None	None	None	None	None	None	None	None	None	None	None	None	None	None	None	None	None	None	None	None
179.m00098	CNAG_01588	YDR276C	PMP3	SPBC713.11c	pmp3	orf19.2959.1	ca4174	IPF4430	KOG1773	R	Stress responsive protein	hypothetical protein	Small plasma membrane protein related to a family of plant polypeptides that are overexpressed under high salt concentration or low temperature, not essential for viability, deletion causes hyperpolarization of the plasma membrane potential	plasma membrane proteolipid Pmp3	unknown function	None	None	None	None	None	None	None	None	Spo_OS-up_2.0	None	Spo_XS-up_2.0	None	None	None	None	None	None	None	None	None	None	None	None	None	Cal_OS-up_1.5	None	None	None	None	None	None	None	None	None
179.m00114	CNAG_01610	YLR148W	PEP3	SPCC790.02	pep3	orf19.5584	ca2498	VPS181	KOG2034	U	Vacuolar sorting protein PEP3/VPS18	DigA protein	Component of CORVET tethering complex; vacuolar peripheral membrane protein that promotes vesicular docking/fusion reactions in conjunction with SNARE proteins, required for vacuolar biogenesis	ubiquitin-protein ligase E3 (predicted)	vacuolar membrane protein	None	None	None	None	Sce_HS-up_2.0	None	None	None	None	None	None	None	None	None	None	None	None	None	None	None	None	None	None	None	None	None	None	None	None	None	None	None	None	None
179.m00123	CNAG_01621	None	None	None	None	None	None	None	None	None	None	conserved hypothetical protein	None	None	None	None	None	None	None	None	None	None	None	None	None	None	None	None	None	None	None	None	None	None	None	None	None	None	None	None	None	None	None	None	None	None	None	None	None
179.m00125	CNAG_01625	None	None	None	None	None	None	None	KOG2793	A	Putative N2,N2-dimethylguanosine tRNA methyltransferase	conserved hypothetical protein	None	None	None	None	None	None	None	None	None	None	None	None	None	None	None	None	None	None	None	None	None	None	None	None	None	None	None	None	None	None	None	None	None	None	None	None	None
179.m00131	CNAG_01630	YNL317W	PFS2	SPAC12G12.14c	pfs2	orf19.2307	ca3310	PFS2	KOG0284	A	Polyadenylation factor I complex, subunit PFS2	polyadenylation factor subunit 2	Integral subunit of the pre-mRNA cleavage and polyadenylation factor (CPF) complex; plays an essential role in mRNA 3'-end formation by bridging different processing factors and thereby promoting the assembly of the processing complex	WD repeat protein Pfs2	Polyadenylation Factor I subunit (by homology)	None	None	None	None	None	None	None	None	None	None	None	None	None	None	None	None	None	None	None	None	None	None	None	None	None	None	None	None	Cal_XS-up_1.5	None	None	None	None	None
179.m00147	CNAG_07807	YNL030W	HHF2	SPBC1105.12	hhf3	orf19.1854	ca3372	HHF22	KOG3467	B	Histone H4	histone H4	One of two identical histone H4 proteins (see also HHF1); core histone required for chromatin assembly and chromosome function; contributes to telomeric silencing; N-terminal domain involved in maintaining genomic integrity	histone H4 h4.3	histone H4 (by homology)	None	Sce_OS-dw_2.0	None	Sce_XS-dw_2.0	None	Sce_HS-dw_2.0	None	Sce_CSR-dw_2.0	None	Spo_OS-dw_2.0	None	None	None	None	None	None	None	None	None	None	None	None	None	None	None	None	None	None	None	Cal_XS-dw_1.5	None	Cal_XS-dw_2.0	None	Cal_Cd-dw_1.5
179.m00150	CNAG_01652	YPL096W	PNG1	SPBC1709.14	None	orf19.26	ca3609	IPF3856	KOG0909	O	Peptide:N-glycanase	peptide-N4-(N-acetyl-beta-glucosaminyl)asparagine amidase	Conserved peptide N-glycanase required for deglycosylation of misfolded glycoproteins during proteasome-dependent degradation, localizes to the cytoplasm and nucleus, interacts with the DNA repair protein Rad23p	peptide N-glycanase (predicted)	similar to Saccharomyces cerevisiae Png1P peptide:N-glycanase (by homology)	None	None	None	Sce_XS-dw_2.0	Sce_HS-up_2.0	None	None	None	None	None	None	None	None	None	None	None	None	None	None	None	Cal_HS-up	None	Cal_SSR.HS-up	None	None	None	None	None	None	None	None	None	None	None
179.m00155	CNAG_01657	YPL262W	FUM1	SPCC18.18c	fum1	orf19.543	ca4255	FUM11	KOG1317	C	Fumarase	fumarate hydratase	Fumarase, converts fumaric acid to L-malic acid in the TCA cycle; cytosolic and mitochondrial localization determined by the N-terminal mitochondrial targeting sequence and protein conformation; phosphorylated in mitochondria	fumarate hydratase	fumarate hydratase	None	None	None	None	None	None	None	None	None	None	None	None	None	None	None	None	None	None	None	None	None	None	None	None	None	None	None	None	None	None	None	None	None	None
179.m00160	CNAG_01664	YBR160W	CDC28	SPBC11B10.09	cdc2	orf19.3856	ca3095	CDC28	KOG0594	R	Protein kinase PCTAIRE and related kinases	CMGC/CDK/CDC2 protein kinase	Catalytic subunit of the main cell cycle cyclin-dependent kinase (CDK); alternately associates with G1 cyclins (CLNs) and G2/M cyclins (CLBs) which direct the CDK to specific substrates	cyclin-dependent protein kinase Cdc2	CELL DIVISION CONTROL PROTEIN 28 -protein kinase	Sce_OS-up_2.0	None	None	Sce_XS-dw_2.0	None	None	None	None	None	None	None	None	None	None	None	None	None	None	None	None	None	None	None	None	None	None	None	None	None	None	None	None	None	None
179.m00166	CNAG_01671	None	None	None	None	None	None	None	KOG0540	EI	3-Methylcrotonyl-CoA carboxylase, non-biotin containing subunit/Acetyl-CoA carboxylase carboxyl transferase, subunit beta	acetyl/propionyl CoA carboxylase	None	None	None	None	None	None	None	None	None	None	None	None	None	None	None	None	None	None	None	None	None	None	None	None	None	None	None	None	None	None	None	None	None	None	None	None	None
179.m00169	CNAG_01674	None	None	None	None	None	None	None	KOG2533	G	Permease of the major facilitator superfamily	MFS transporter	None	None	None	None	None	None	None	None	None	None	None	None	None	None	None	None	None	None	None	None	None	None	None	None	None	None	None	None	None	None	None	None	None	None	None	None	None
179.m00174	CNAG_01679	YDR337W	MRPS28	SPBC11B10.04c	mrps28	orf19.2520	ca0462	MRPS28	KOG2815	J	Mitochondrial/choloroplast ribosomal protein S15	conserved hypothetical protein	Mitochondrial ribosomal protein of the small subunit	mitochondrial ribosomal protein subunit S28	ribosomal protein (by homology)	None	None	None	None	None	None	None	None	None	None	None	None	None	None	None	None	None	None	None	None	None	None	None	None	None	None	None	None	None	None	None	None	None	None
179.m00179	CNAG_01686	YDR533C	HSP31	SPBC947.09	None	orf19.251	ca0828	IPF17186	None	None	None	ThiJ/PfpI	Possible chaperone and cysteine protease with similarity to E. coli Hsp31; member of the DJ-1/ThiJ/PfpI superfamily, which includes human DJ-1 involved in Parkinson's disease; exists as a dimer and contains a putative metal-binding site	ThiJ domain protein	unknown function	Sce_OS-up_2.0	None	None	None	Sce_HS-up_2.0	None	None	None	None	None	Spo_XS-up_2.0	None	Spo_Cd-up_2.0	None	None	None	None	None	Cal_XS-up	None	Cal_HS-up	None	None	None	Cal_OS-up_1.5	None	Cal_OS-up_2.0	None	Cal_XS-up_1.5	None	Cal_XS-up_2.0	None	Cal_Cd-up_1.5	None
179.m00189	CNAG_01696	None	None	SPCC4G3.14	mdj1	orf19.6672	ca4275	MDJ1	KOG0715	O	Molecular chaperone (DnaJ superfamily)	DNAj protein	None	DNAJ domain protein Mdj1 (predicted)	Heat shock protein - chaperone (by homology)	None	None	None	None	None	None	None	None	None	None	None	None	Spo_Cd-up_2.0	None	None	None	None	None	None	None	None	None	None	None	None	None	None	None	None	None	None	None	None	None
179.m00220	CNAG_01735	None	None	None	None	None	None	None	KOG0053	E	Cystathionine beta-lyases/cystathionine gamma-synthases	conserved hypothetical protein	None	None	None	None	None	None	None	None	None	None	None	None	None	None	None	None	None	None	None	None	None	None	None	None	None	None	None	None	None	None	None	None	None	None	None	None	None
179.m00234	CNAG_01753	None	None	None	None	None	None	None	KOG0392	K	SNF2 family DNA-dependent ATPase domain-containing protein	conserved hypothetical protein	None	None	None	None	None	None	None	None	None	None	None	None	None	None	None	None	None	None	None	None	None	None	None	None	None	None	None	None	None	None	None	None	None	None	None	None	None
179.m00271	CNAG_01813	YDL055C	PSA1	SPCC1906.01	mpg1	orf19.6190	ca3208	PSA1	KOG1322	M	GDP-mannose pyrophosphorylase/mannose-1-phosphate guanylyltransferase	mannose-1-phosphate guanylyltransferase	GDP-mannose pyrophosphorylase (mannose-1-phosphate guanyltransferase), synthesizes GDP-mannose from GTP and mannose-1-phosphate in cell wall biosynthesis; required for normal cell wall structure	mannose-1-phosphate guanyltransferase Mpg1	GDP-mannose pyrophosphorylase	None	Sce_OS-dw_2.0	None	None	None	Sce_HS-dw_2.0	None	None	None	None	None	None	None	None	None	None	None	None	None	None	None	None	None	None	None	None	None	None	None	None	None	None	None	None
179.m00273	CNAG_01817	YDR292C	SRP101	SPBC3B9.03	None	orf19.3952	ca1011	SRP101	KOG0781	U	Signal recognition particle receptor, alpha subunit	signal recognition particle binding protein	Signal recognition particle (SRP) receptor - alpha subunit; contain GTPase domains; involved in SRP-dependent protein targeting; interacts with SRP102p	signal recognition particle receptor alpha subunit Srp101	signal recognition particle receptor, alpha chain (by homology)	None	None	None	None	None	None	None	None	None	None	None	None	None	None	None	None	None	None	None	None	None	None	None	None	None	None	None	None	None	None	None	None	None	None
179.m00275	CNAG_01819	YDR116C	MRPL1	SPAC1610.02c	None	orf19.5698	ca2613	IPF5446	None	None	None	ribosomal protein L1	Mitochondrial ribosomal protein of the large subunit	mitochondrial ribosomal protein subunit L1	putative ribosomal protein (by homology)	None	None	None	None	None	None	None	None	None	None	None	None	None	None	None	None	None	None	None	None	None	None	None	None	None	None	None	None	None	None	None	None	None	None
179.m00278	CNAG_01823	YDR287W	INM2	None	None	None	None	None	KOG2951	G	Inositol monophosphatase	myo-inositol monophosphatase	Inositol monophosphatase, involved in biosynthesis of inositol; enzymatic activity requires magnesium ions and is inhibited by lithium and sodium ions; inm1 inm2 double mutant lacks inositol auxotrophy	None	None	None	None	None	None	Sce_HS-up_2.0	None	None	None	None	None	None	None	None	None	None	None	None	None	None	None	None	None	None	None	None	None	None	None	None	None	None	None	None	None
179.m00302	CNAG_02714	YAL003W	EFB1	SPCC1450.04	tef5	orf19.3838	ca4862	EFB1	KOG1668	K	Elongation factor 1 beta/delta chain	elongation factor 1-beta	Translation elongation factor 1 beta; stimulates nucleotide exchange to regenerate EF-1 alpha-GTP for the next elongation cycle; part of the EF-1 complex, which facilitates binding of aminoacyl-tRNA to the ribosomal A site	translation elongation factor EF-1 beta subunit (eEF1B)	translation elongation factor eEF1beta	None	Sce_OS-dw_2.0	None	Sce_XS-dw_2.0	None	None	None	None	None	None	None	Spo_XS-dw_2.0	None	Spo_Cd-dw_2.0	None	Spo_CESR-dw	None	None	None	Cal_XS-dw	None	None	None	Cal_SSR.XS-dw	None	None	None	None	None	None	None	None	None	None
179.m00342	CNAG_02769	None	None	None	None	None	None	None	KOG1239	OU	Inner membrane protein translocase involved in respiratory chain assembly	conserved hypothetical protein	None	None	None	None	None	None	None	None	None	None	None	None	None	None	None	None	None	None	None	None	None	None	None	None	None	None	None	None	None	None	None	None	None	None	None	None	None
179.m00343	CNAG_02775	None	None	None	None	None	None	None	None	None	None	conserved hypothetical protein	None	None	None	None	None	None	None	None	None	None	None	None	None	None	None	None	None	None	None	None	None	None	None	None	None	None	None	None	None	None	None	None	None	None	None	None	None
179.m00345	CNAG_02779	YFR047C	BNA6	None	None	orf19.5054	ca1742	IPF12210	None	None	None	nicotinate-nucleotide diphosphorylase	Quinolinate phosphoribosyl transferase, required for the de novo biosynthesis of NAD from tryptophan via kynurenine; expression regulated by Hst1p	None	quinolinate phosphoribosyltransferase (by homology)	None	None	Sce_XS-up_2.0	None	Sce_HS-up_2.0	None	None	None	None	None	None	None	None	None	None	None	None	None	None	None	None	None	None	None	None	None	None	None	None	None	None	None	None	None
179.m00348	CNAG_02782	YHL039W	None	SPBC1709.13c	None	orf19.7326	None	None	KOG1337	R	N-methyltransferase	cytoplasmic protein	None	lysine methyltransferase (predicted)	None	None	Sce_OS-dw_2.0	None	Sce_XS-dw_2.0	None	Sce_HS-dw_2.0	None	Sce_CSR-dw_2.0	None	None	None	None	None	None	None	None	None	None	None	None	None	None	None	None	None	None	None	None	None	None	None	None	None	None
179.m00352	CNAG_02788	None	None	None	None	None	None	None	None	None	None	conserved hypothetical protein	None	None	None	None	None	None	None	None	None	None	None	None	None	None	None	None	None	None	None	None	None	None	None	None	None	None	None	None	None	None	None	None	None	None	None	None	None
179.m00354	CNAG_02790	None	None	None	None	None	None	None	KOG1950	G	Glycosyl transferase, family 8 - glycogenin	galactinol synthase	None	None	None	None	None	None	None	None	None	None	None	None	None	None	None	None	None	None	None	None	None	None	None	None	None	None	None	None	None	None	None	None	None	None	None	None	None
179.m00384	CNAG_02833	None	None	None	None	None	None	None	KOG3468	C	NADH:ubiquinone oxidoreductase, NDUFB7/B18 subunit	conserved hypothetical protein	None	None	None	None	None	None	None	None	None	None	None	None	None	None	None	None	None	None	None	None	None	None	None	None	None	None	None	None	None	None	None	None	None	None	None	None	None
179.m00392	CNAG_02842	YNL252C	MRPL17	SPCC126.05c	mrpl17	orf19.585	ca3432	MRPL17	KOG4548	J	Mitochondrial ribosomal protein L17	conserved hypothetical protein	Mitochondrial ribosomal protein of the large subunit	mitochondrial ribosomal protein subunit L17	ribosomal protein of the large subunit (YmL30), mitochondrial (by homology)	None	None	Sce_XS-up_2.0	None	None	None	None	None	None	None	None	None	None	None	None	None	None	None	None	None	None	None	None	None	None	None	None	None	None	None	None	None	None	None
179.m00436	CNAG_02897	YDR017C	KCS1	SPCC970.08	None	orf19.1007	ca0133	IPF3746	KOG1620	KIT	Inositol polyphosphate multikinase, component of the ARGR transcription regulatory complex	inositol hexaphosphate kinase 1	Inositol hexakisphosphate (IP6) and inositol heptakisphosphate (IP7) kinase; generation of high energy inositol pyrophosphates by Kcs1p is required for many processes such as vacuolar biogenesis, stress response and telomere maintenance	inositol polyphosphate kinase (predicted)	unknown function	None	None	None	Sce_XS-dw_2.0	None	None	None	None	None	None	None	None	None	None	None	None	None	None	None	None	None	None	None	None	None	None	None	None	None	None	None	None	None	None
179.m00505	CNAG_02967	None	None	SPAC9E9.15	None	None	None	None	None	None	None	conserved hypothetical protein	None	CIA30 family protein	None	None	None	None	None	None	None	None	None	None	None	None	None	None	None	None	None	None	None	None	None	None	None	None	None	None	None	None	None	None	None	None	None	None	None
179.m00539	CNAG_01558	None	None	None	None	None	None	None	KOG0024	Q	Sorbitol dehydrogenase	zinc-binding dehydrogenase	None	None	None	None	None	None	None	None	None	None	None	None	None	None	None	None	None	None	None	None	None	None	None	None	None	None	None	None	None	None	None	None	None	None	None	None	None
179.m00540	CNAG_01557	YBR109C	CMD1	SPAC3A12.14	cam1	orf19.4413	None	None	KOG0027	T	Calmodulin and related proteins (EF-Hand superfamily)	calmodulin 1b	Calmodulin; Ca++ binding protein that regulates Ca++ independent processes (mitosis, bud growth, actin organization, endocytosis, etc.) and Ca++ dependent processes (stress-activated pathways), targets include Nuf1p, Myo2p and calcineurin	calmodulin Cam1	None	None	None	Sce_XS-up_2.0	None	None	None	None	None	None	None	None	None	None	None	None	None	None	None	None	None	None	None	None	None	None	None	None	None	None	None	None	None	None	None
179.m00555	CNAG_01539	YJL153C	INO1	None	None	orf19.7585	ca5986	INO1	KOG0693	I	Myo-inositol-1-phosphate synthase	inositol-3-phosphate synthase	Inositol 1-phosphate synthase, involved in synthesis of inositol phosphates and inositol-containing phospholipids; transcription is coregulated with other phospholipid biosynthetic genes by Ino2p and Ino4p, which bind the UASINO DNA element	None	myo-inositol-1-phosphate synthase	None	None	Sce_XS-up_2.0	Sce_XS-dw_2.0	Sce_HS-up_2.0	None	None	None	None	None	None	None	None	None	None	None	None	None	Cal_XS-up	None	None	None	Cal_SSR.XS-up	None	None	None	None	None	None	None	None	None	None	None
179.m00579	CNAG_01510	YMR129W	POM152	SPBC29A10.07	None	orf19.2081	ca4817	POM152	None	None	None	conserved hypothetical protein	Nuclear pore membrane glycoprotein; may be involved in duplication of nuclear pores and nuclear pore complexes during S-phase;	nucleoporin Pom152	Nuclear pore membrane glycoprotein (by homology)	None	None	None	None	None	None	None	None	None	None	None	None	None	None	None	None	None	None	None	None	None	None	None	None	None	None	None	None	None	None	None	None	None	None
179.m00590	CNAG_01491	YGL242C	None	SPAC105.02c	None	orf19.7109	ca5591	IPF5618	None	None	None	conserved hypothetical protein	None	ankyrin repeat protein, unknown biological role	unknown function	None	None	None	None	None	None	None	None	None	None	None	None	None	None	None	None	None	None	None	None	None	None	None	None	None	None	None	None	None	None	None	None	None	None
179.m00627	CNAG_01485	YDL174C	DLD1	None	None	orf19.6043	ca4905	DLD1	KOG1231	C	Proteins containing the FAD binding domain	D-lactate dehydrogenase cytochrome oxidoreductase protein	D-lactate dehydrogenase, oxidizes D-lactate to pyruvate, transcription is heme-dependent, repressed by glucose, and derepressed in ethanol or lactate; located in the mitochondrial inner membrane	None	D-lactate ferricytochrome C oxidoreductase (by homology)	None	None	None	None	Sce_HS-up_2.0	None	None	None	None	None	None	None	None	None	None	None	None	None	None	None	None	None	None	None	None	None	None	None	None	None	None	None	None	None
179.m00652	None	None	None	None	None	None	None	None	None	None	None	None	None	None	None	None	None	None	None	None	None	None	None	None	None	None	None	None	None	None	None	None	None	None	None	None	None	None	None	None	None	None	None	None	None	None	None	None	None
179.m00658	CNAG_01632	YDR058C	TGL2	None	None	orf19.3043	ca5070	IPF3594	None	None	None	triacylglycerol lipase	Protein with lipolytic activity towards triacylglycerols and diacylglycerols when expressed in E. coli; role in yeast lipid degradation is unclear	None	triglyceride lipase (by homology)	Sce_OS-up_2.0	None	Sce_XS-up_2.0	None	Sce_HS-up_2.0	None	Sce_CSR-up_2.0	None	None	None	None	None	None	None	None	None	None	None	None	None	None	None	None	None	None	None	None	None	None	None	None	None	None	None
179.m00668	CNAG_01760	None	None	None	None	None	None	None	KOG1980	S	Uncharacterized conserved protein	conserved hypothetical protein	None	None	None	None	None	None	None	None	None	None	None	None	None	None	None	None	None	None	None	None	None	None	None	None	None	None	None	None	None	None	None	None	None	None	None	None	None
179.m00672	CNAG_01814	None	None	None	None	None	None	None	KOG1217	T	Fibrillins and related proteins containing Ca2+-binding EGF-like domains	conserved hypothetical protein	None	None	None	None	None	None	None	None	None	None	None	None	None	None	None	None	None	None	None	None	None	None	None	None	None	None	None	None	None	None	None	None	None	None	None	None	None
179.m00687	CNAG_02740	None	None	SPAC3A12.04c	None	None	None	None	KOG2363	J	Protein subunit of nuclear ribonuclease P (RNase P)	conserved hypothetical protein	None	RNase P and RNase MRP subunit p30 (predicted)	None	None	None	None	None	None	None	None	None	None	None	None	None	None	None	None	None	None	None	None	None	None	None	None	None	None	None	None	None	None	None	None	None	None	None
179.m00694	CNAG_02810	YGL014W	PUF4	SPAC6G9.14	None	orf19.5381	ca2299	IPF8222	None	None	None	pumilio-family RNA binding protein	Member of the PUF protein family, which is defined by the presence of Pumilio homology domains that confer RNA binding activity; preferentially binds mRNAs encoding nucleolar ribosomal RNA-processing factors	RNA-binding protein	unknown function	None	None	None	None	None	Sce_HS-dw_2.0	None	None	None	None	None	None	Spo_Cd-up_2.0	None	None	None	None	None	None	None	Cal_HS-up	None	Cal_SSR.HS-up	None	None	None	None	None	None	None	None	None	None	None
179.m00728	CNAG_02996	None	None	None	None	orf19.2284	ca0997	IPF9998	KOG0986	T	G protein-coupled receptor kinase	flavoprotein oxygenase	None	None	unknown function	None	None	None	None	None	None	None	None	None	None	None	None	None	None	None	None	None	None	None	None	None	None	None	None	None	None	None	None	Cal_XS-up_1.5	None	Cal_XS-up_2.0	None	None	None
179.m05154	CNAG_02716	None	None	None	None	None	None	None	KOG4682	R	Uncharacterized conserved protein, contains BTB/POZ domain	conserved hypothetical protein	None	None	None	None	None	None	None	None	None	None	None	None	None	None	None	None	None	None	None	None	None	None	None	None	None	None	None	None	None	None	None	None	None	None	None	None	None
180.m00003	CNAG_05979	None	None	None	None	None	None	None	KOG0069	C	Glyoxylate/hydroxypyruvate reductase (D-isomer-specific 2-hydroxy acid dehydrogenase superfamily)	phosphoglycerate dehydrogenase	None	None	None	None	None	None	None	None	None	None	None	None	None	None	None	None	None	None	None	None	None	None	None	None	None	None	None	None	None	None	None	None	None	None	None	None	None
180.m00008	CNAG_05970	YHL007C	STE20	SPBC1604.14c	shk1	orf19.4242	ca4132	STE20	KOG0578	T	p21-activated serine/threonine protein kinase	STE/STE20/PAKA protein kinase	Signal transducing kinase of the PAK (p21-activated kinase) family, involved in pheromone response and pseudohyphal/invasive growth pathways, activated by Cdc42p; binds Ste4p at a GBB motif present in noncatalytic domains of PAK kinases	PAK-related kinase Shk1	serine/threonine-specific protein kinase	None	None	None	None	None	None	None	None	None	None	None	None	None	None	None	None	None	None	None	None	None	None	None	None	None	None	None	None	None	None	None	None	None	None
180.m00017	CNAG_07695	None	None	SPAC9.10	thi9	None	None	None	KOG1289	E	Amino acid transporters	gamma-aminobutyric acid transporter	None	thiamine transporter Thi9	None	None	None	None	None	None	None	None	None	None	None	Spo_XS-up_2.0	None	None	Spo_Cd-dw_2.0	None	None	None	None	None	None	None	None	None	None	None	None	None	None	None	None	None	None	None	None
180.m00018	CNAG_07695	None	None	SPAC9.10	thi9	None	None	None	KOG1289	E	Amino acid transporters	gamma-aminobutyric acid transporter	None	thiamine transporter Thi9	None	None	None	None	None	None	None	None	None	None	None	Spo_XS-up_2.0	None	None	Spo_Cd-dw_2.0	None	None	None	None	None	None	None	None	None	None	None	None	None	None	None	None	None	None	None	None
180.m00019	CNAG_07695	None	None	SPAC9.10	thi9	None	None	None	KOG1289	E	Amino acid transporters	gamma-aminobutyric acid transporter	None	thiamine transporter Thi9	None	None	None	None	None	None	None	None	None	None	None	Spo_XS-up_2.0	None	None	Spo_Cd-dw_2.0	None	None	None	None	None	None	None	None	None	None	None	None	None	None	None	None	None	None	None	None
180.m00027	CNAG_05921	YOR245C	DGA1	SPCC1235.15	dga1	orf19.6941	ca4709	IPF5895	KOG0831	I	Acyl-CoA:diacylglycerol acyltransferase (DGAT)	diacylglycerol O-acyltransferase	Diacylglycerol acyltransferase, catalyzes the terminal step of triacylglycerol (TAG) formation, acylates diacylglycerol using acyl-CoA as an acyl donor, localized to lipid particles	diacylglycerol O-acyltransferase	unknown function	Sce_OS-up_2.0	None	None	None	None	None	None	None	None	None	Spo_XS-up_2.0	None	Spo_Cd-up_2.0	None	None	None	None	None	None	None	None	None	None	None	None	None	None	None	None	None	None	None	None	None
180.m00054	CNAG_05861	None	None	None	None	None	None	None	KOG2294	K	Transcription factor of the Forkhead/HNF3 family	conserved hypothetical protein	None	None	None	None	None	None	None	None	None	None	None	None	None	None	None	None	None	None	None	None	None	None	None	None	None	None	None	None	None	None	None	None	None	None	None	None	None
180.m00066	CNAG_05847	YDR353W	TRR1	SPBC3F6.03	trr1	orf19.4290	ca3059	TRR1	KOG0404	O	Thioredoxin reductase	thioredoxin-disulfide reductase	Cytoplasmic thioredoxin reductase, key regulatory enzyme that determines the redox state of the thioredoxin system, which acts as a disulfide reductase system and protects cells against both oxidative and reductive stress	thioredoxin reductase Trr1	Thioredoxin reductase (by homology)	Sce_OS-up_2.0	Sce_OS-dw_2.0	Sce_XS-up_2.0	None	None	None	None	None	None	None	Spo_XS-up_2.0	None	None	None	None	None	None	None	Cal_XS-up	None	None	None	Cal_SSR.XS-up	None	None	None	None	None	Cal_XS-up_1.5	None	Cal_XS-up_2.0	None	None	None
180.m00068	CNAG_05844	None	None	SPAC13G6.04	tim8	None	None	None	KOG3489	U	Mitochondrial import inner membrane translocase, subunit TIM8	mitochondrial import inner membrane translocase subunit TIM8	None	TIM22 inner membrane protein import complex subunit Tim8 (predicted)	None	None	None	None	None	None	None	None	None	None	None	None	None	None	None	None	None	None	None	None	None	None	None	None	None	None	None	None	None	None	None	None	None	None	None
180.m00083	CNAG_05805	None	None	None	None	None	None	None	KOG4466	DK	Component of histone deacetylase complex (breast carcinoma metastasis suppressor 1 protein in human)	conserved hypothetical protein	None	None	None	None	None	None	None	None	None	None	None	None	None	None	None	None	None	None	None	None	None	None	None	None	None	None	None	None	None	None	None	None	None	None	None	None	None
180.m00110	CNAG_05734	YBL007C	SLA1	SPAC16E8.01	None	orf19.1474	ca4531	SLA1	None	None	None	conserved hypothetical protein	Cytoskeletal protein binding protein required for assembly of the cortical actin cytoskeleton; interacts with proteins regulating actin dynamics and proteins required for endocytosis; found in the nucleus and cell cortex; has 3 SH3 domains	cytoskeletal protein binding protein Sla1 family (predicted)	cytoskeleton assembly control protein	None	None	None	None	None	None	None	None	None	None	None	None	None	None	None	None	None	None	None	None	None	None	None	None	None	None	None	None	None	None	None	None	None	None
180.m00113	CNAG_05726	YKL207W	LRC3	SPBC1711.03	None	orf19.6462	ca4129	IPF6878	KOG3188	S	Uncharacterized conserved protein	DUF850 domain-containing protein	Putative protein of unknown function; non-essential gene; null mutant displays decreased frequency of mitochondrial genome loss (petite formation) and severe growth defect in minimal glycerol media	conserved eukaryotic protein	unknown function	None	None	None	None	None	None	None	None	None	None	None	None	None	None	None	None	None	None	None	None	None	None	None	None	None	None	None	None	None	None	None	None	None	None
180.m00114	CNAG_05725	YLR355C	ILV5	SPBC56F2.12	ilv5	orf19.88	ca1983	ILV5	None	None	None	ketol-acid reductoisomerase	Acetohydroxyacid reductoisomerase, mitochondrial protein involved in branched-chain amino acid biosynthesis, also required for maintenance of wild-type mitochondrial DNA and found in mitochondrial nucleoids	acetohydroxyacid reductoisomerase	ketol-acid reducto-isomerase (by homology)	None	None	None	Sce_XS-dw_2.0	None	Sce_HS-dw_2.0	None	None	None	None	None	Spo_XS-dw_2.0	None	None	None	None	None	None	None	None	None	None	None	None	None	None	None	None	None	Cal_XS-dw_1.5	None	None	None	None
180.m00122	CNAG_05708	YBR058C	UBP14	SPBC6B1.06c	ubp14	orf19.1516	ca1752	UBP14	KOG0944	O	Ubiquitin-specific protease UBP14	ubiquitin carboxyl-terminal hydrolase 14	Ubiquitin-specific protease that specifically disassembles unanchored ubiquitin chains; involved in fructose-1,6-bisphosphatase (Fbp1p) degradation; similar to human isopeptidase T	ubiquitin C-terminal hydrolase Ubp14	Ubiquitin-specific protease (by homology)	None	None	None	None	None	None	None	None	None	None	None	None	None	None	None	None	None	None	None	None	None	None	None	None	None	None	None	None	None	None	None	None	None	None
180.m00127	CNAG_05683	None	None	None	None	None	None	None	KOG0244	Z	Kinesin-like protein	conserved hypothetical protein	None	None	None	None	None	None	None	None	None	None	None	None	None	None	None	None	None	None	None	None	None	None	None	None	None	None	None	None	None	None	None	None	None	None	None	None	None
180.m00143	CNAG_06696	YGL190C	CDC55	SPAC227.07c	pab1	orf19.1468	ca4535	CDC55	KOG1354	T	Serine/threonine protein phosphatase 2A, regulatory subunit	Ppp2r2b protein	Non-essential regulatory subunit B of protein phosphatase 2A, which has multiple roles in mitosis and protein biosynthesis; involved in regulation of mitotic exit; found in the nucleus of most cells, also at the bud neck and at the bud tip	protein phosphatase regulatory subunit Pab1	B subunit of protein phosphatase 2A (by homology)	None	None	None	None	None	None	None	None	None	None	None	None	None	None	None	None	None	None	None	None	None	None	None	None	None	None	None	None	None	None	None	None	None	None
180.m00161	CNAG_06671	None	None	None	None	None	None	None	KOG0192	T	Tyrosine kinase specific for activated (GTP-bound) p21cdc42Hs	TKL-group protein kinase	None	None	None	None	None	None	None	None	None	None	None	None	None	None	None	None	None	None	None	None	None	None	None	None	None	None	None	None	None	None	None	None	None	None	None	None	None
180.m00170	CNAG_06658	None	None	None	None	orf19.5234	ca5013	IPF13941	KOG2289	T	Rhomboid family proteins	rhomboid family membrane protein	None	None	Unknown function	None	None	None	None	None	None	None	None	None	None	None	None	None	None	None	None	None	None	None	None	None	None	None	None	None	None	None	None	None	None	None	None	None	None
180.m00171	CNAG_06656	YLR172C	DPH5	SPCC576.14	None	orf19.6676	ca4279	DPH51	KOG3123	J	Diphthine synthase	diphthine synthase	Methyltransferase required for synthesis of diphthamide, which is a modified histidine residue of translation elongation factor 2 (Eft1p or Eft2p); not essential for viability; GFP-Dph5p fusion protein localizes to the cytoplasm	diphthine synthase (predicted)	Diphthamide methyltransferase (by homology)	None	None	None	None	None	Sce_HS-dw_2.0	None	None	None	None	None	None	None	None	None	None	None	None	None	None	None	None	None	None	None	None	None	None	None	None	None	None	None	None
180.m00179	CNAG_06631	None	None	None	None	None	None	None	KOG1836	W	Extracellular matrix glycoprotein Laminin subunits alpha and gamma	myosin heavy chain	None	None	None	None	None	None	None	None	None	None	None	None	None	None	None	None	None	None	None	None	None	None	None	None	None	None	None	None	None	None	None	None	None	None	None	None	None
180.m00202	CNAG_06591	YKR029C	SET3	SPAC22E12.11c	set3	orf19.7221	ca5346	IPF867	KOG1844	R	PHD Zn-finger proteins	conserved hypothetical protein	Defining member of the SET3 histone deacetylase complex which is a meiosis-specific repressor of sporulation genes; necessary for efficient transcription by RNAPII; one of two yeast proteins that contains both SET and PHD domains	histone lysine methyltransferase Set3	unknown function	None	None	None	None	None	None	None	None	None	None	None	None	None	None	None	None	None	None	None	None	None	None	None	None	None	None	None	None	None	Cal_XS-dw_1.5	None	None	None	None
180.m00208	CNAG_06580	None	None	None	None	None	None	None	KOG0017	R	FOG: Transposon-encoded proteins with TYA, reverse transcriptase, integrase domains in various combinations	VosA	None	None	None	None	None	None	None	None	None	None	None	None	None	None	None	None	None	None	None	None	None	None	None	None	None	None	None	None	None	None	None	None	None	None	None	None	None
180.m00211	CNAG_06577	None	None	None	None	None	None	None	None	None	None	conserved hypothetical protein	None	None	None	None	None	None	None	None	None	None	None	None	None	None	None	None	None	None	None	None	None	None	None	None	None	None	None	None	None	None	None	None	None	None	None	None	None
180.m00213	CNAG_06574	None	None	None	None	None	None	None	None	None	None	antiphagocytic protein 1	None	None	None	None	None	None	None	None	None	None	None	None	None	None	None	None	None	None	None	None	None	None	None	None	None	None	None	None	None	None	None	None	None	None	None	None	None
180.m00241	CNAG_06531	None	None	None	None	None	None	None	None	None	None	conserved hypothetical protein	None	None	None	None	None	None	None	None	None	None	None	None	None	None	None	None	None	None	None	None	None	None	None	None	None	None	None	None	None	None	None	None	None	None	None	None	None
180.m00249	CNAG_07688	None	None	None	None	None	None	None	KOG1363	T	Predicted regulator of the ubiquitin pathway (contains UAS and UBX domains)	conserved hypothetical protein	None	None	None	None	None	None	None	None	None	None	None	None	None	None	None	None	None	None	None	None	None	None	None	None	None	None	None	None	None	None	None	None	None	None	None	None	None
180.m00302	CNAG_05845	None	None	SPAC31G5.21	None	None	None	None	KOG3410	S	Conserved alpha-helical protein	conserved hypothetical protein	None	human family 32A homolog	None	None	None	None	None	None	None	None	None	None	None	None	None	None	None	None	None	None	None	None	None	None	None	None	None	None	None	None	None	None	None	None	None	None	None
180.m00314	CNAG_05833	None	None	None	None	None	None	None	KOG2533	G	Permease of the major facilitator superfamily	allantoate transporter	None	None	None	None	None	None	None	None	None	None	None	None	None	None	None	None	None	None	None	None	None	None	None	None	None	None	None	None	None	None	None	None	None	None	None	None	None
180.m00339	CNAG_05787	YAL043C	PTA1	SPAC1071.01c	pta1	orf19.7041	ca5222	IPF3079	KOG1895	A	mRNA cleavage and polyadenylation factor II complex, subunit PTA1	cleavage/polyadenylation specificity factor	Subunit of holo-CPF, a multiprotein complex and functional homolog of mammalian CPSF, required for the cleavage and polyadenylation of mRNA and snoRNA 3' ends; involved in pre-tRNA processing; binds to the phosphorylated CTD of RNAPII	mRNA cleavage and polyadenylation specificity factor complex subunit Pta1	similar to Saccharomyces cerevisiae Pta1p pre-tRNA processing protein (by homology)	None	None	None	None	None	None	None	None	None	None	None	None	None	None	None	None	None	None	None	None	None	None	None	None	None	None	None	None	None	Cal_XS-dw_1.5	None	None	None	None
180.m00358	CNAG_05741	None	None	None	None	None	None	None	None	None	None	conserved hypothetical protein	None	None	None	None	None	None	None	None	None	None	None	None	None	None	None	None	None	None	None	None	None	None	None	None	None	None	None	None	None	None	None	None	None	None	None	None	None
180.m00381	CNAG_05705	None	None	SPAC1071.11	None	None	None	None	None	None	None	conserved hypothetical protein	None	NADH-dependent flavin oxidoreductase (predicted)	None	None	None	None	None	None	None	None	None	None	None	None	None	None	None	None	None	None	None	None	None	None	None	None	None	None	None	None	None	None	None	None	None	None	None
180.m00402	CNAG_05693	None	None	None	None	None	None	None	KOG1454	R	Predicted hydrolase/acyltransferase (alpha/beta hydrolase superfamily)	conserved hypothetical protein	None	None	None	None	None	None	None	None	None	None	None	None	None	None	None	None	None	None	None	None	None	None	None	None	None	None	None	None	None	None	None	None	None	None	None	None	None
180.m00430	CNAG_06639	YIL030C	SSM4	SPBC14F5.07	None	orf19.5175	ca4420	SSM4	KOG1609	A	Protein involved in mRNA turnover and stability	conserved hypothetical protein	Ubiquitin-protein ligase of the ER/nuclear envelope, required for degradation of Alpha2p and other proteins containing a Deg1 degradation signal; ssm4 mutation suppresses mRNA instability caused by an rna14 mutation	ER-localized ubiquitin ligase (predicted)	involved in mRNA turnover by homology	None	None	None	None	None	Sce_HS-dw_2.0	None	None	None	None	None	None	None	None	None	None	None	None	None	None	None	None	None	None	None	None	None	None	None	Cal_XS-dw_1.5	None	None	None	None
180.m00451	CNAG_06603	YBR281C	DUG2	None	None	orf19.2455	None	None	KOG2276	E	Metalloexopeptidases	WD repeat-containing protein	Probable di- and tri-peptidase; forms a complex with Dug1p and Dug3p to degrade glutathione (GSH) and other peptides containing a gamma-glu-X bond in an alternative pathway to GSH degradation by gamma-glutamyl transpeptidase (Ecm38p)	None	None	None	None	None	None	None	None	None	None	None	None	None	None	None	None	None	None	None	None	None	None	None	None	None	None	None	None	None	None	None	None	None	None	None	None
180.m02970	CNAG_05876	None	None	None	None	None	None	None	None	None	None	conserved hypothetical protein	None	None	None	None	None	None	None	None	None	None	None	None	None	None	None	None	None	None	None	None	None	None	None	None	None	None	None	None	None	None	None	None	None	None	None	None	None
181.m07801	CNAG_00021	YOL052C	SPE2	SPBP4H10.05c	spe2	orf19.568	ca2712	SPE2	KOG0788	T	S-adenosylmethionine decarboxylase	adenosylmethionine decarboxylase	S-adenosylmethionine decarboxylase, required for the biosynthesis of spermidine and spermine; cells lacking Spe2p require spermine or spermidine for growth in the presence of oxygen but not when grown anaerobically	S-adenosylmethionine decarboxylase proenzyme Spe2	adenosylmethionine decarboxylase precurser(by homology)	None	None	None	None	None	None	None	None	None	None	None	None	None	None	None	None	None	None	None	None	Cal_HS-up	None	Cal_SSR.HS-up	None	None	None	None	None	None	Cal_XS-dw_1.5	None	None	None	None
181.m07803	CNAG_00023	None	None	SPBPB2B2.08	None	None	None	None	None	None	None	conserved hypothetical protein	None	conserved fungal protein	None	None	None	None	None	None	None	None	None	None	None	None	None	Spo_Cd-up_2.0	None	None	None	None	None	None	None	None	None	None	None	None	None	None	None	None	None	None	None	None	None
181.m07966	CNAG_07322	None	None	None	None	None	None	None	KOG0866	U	Ran-binding protein RANBP3	conserved hypothetical protein	None	None	None	None	None	None	None	None	None	None	None	None	None	None	None	None	None	None	None	None	None	None	None	None	None	None	None	None	None	None	None	None	None	None	None	None	None
181.m07996	CNAG_00243	None	None	None	None	None	None	None	None	None	None	conserved hypothetical protein	None	None	None	None	None	None	None	None	None	None	None	None	None	None	None	None	None	None	None	None	None	None	None	None	None	None	None	None	None	None	None	None	None	None	None	None	None
181.m08000	CNAG_00248	YLR417W	VPS36	SPBC3B9.09	vps36	orf19.795	ca1469	IPF5078	KOG2760	U	Vacuolar sorting protein VPS36	conserved hypothetical protein	Component of the ESCRT-II complex; contains the GLUE (GRAM Like Ubiquitin binding in EAP45) domain which is involved in interactions with ESCRT-I and ubiquitin-dependent sorting of proteins into the endosome	RBZ zinc finger protein Vps36	unknown function	Sce_OS-up_2.0	None	None	None	None	None	None	None	None	None	None	None	None	None	None	None	None	None	None	None	None	None	None	None	None	None	None	None	None	None	None	None	None	None
181.m08003	CNAG_00253	YGL233W	SEC15	SPCC1183.01	sec15	orf19.1418	ca3959	IPF11236.3f	KOG2176	U	Exocyst complex, subunit SEC15	rsec15	Essential 113kDa subunit of the exocyst complex (Sec3p, Sec5p, Sec6p, Sec8p, Sec10p, Sec15p, Exo70p, and Exo84p), which mediates polarized targeting of vesicles to active sites of exocytosis; Sec15p associates with Sec4p and vesicles	exocyst complex subunit Sec15 (predicted)	similar to Saccharomyces cerevisiae Sec15p component of the exocyst complex, 3-prime end (by homology)	None	None	None	None	None	None	None	None	None	Spo_OS-dw_2.0	None	None	None	None	None	None	None	None	None	None	None	None	None	None	None	None	None	None	None	None	None	None	None	None
181.m08013	CNAG_00261	None	None	None	None	None	None	None	KOG0939	OK	E3 ubiquitin-protein ligase/Putative upstream regulatory element binding protein	conserved hypothetical protein	None	None	None	None	None	None	None	None	None	None	None	None	None	None	None	None	None	None	None	None	None	None	None	None	None	None	None	None	None	None	None	None	None	None	None	None	None
181.m08015	CNAG_00264	None	None	None	None	None	None	None	None	None	None	nuclease I	None	None	None	None	None	None	None	None	None	None	None	None	None	None	None	None	None	None	None	None	None	None	None	None	None	None	None	None	None	None	None	None	None	None	None	None	None
181.m08041	CNAG_00294	None	None	None	None	None	None	None	KOG1996	A	mRNA splicing factor	conserved hypothetical protein	None	None	None	None	None	None	None	None	None	None	None	None	None	None	None	None	None	None	None	None	None	None	None	None	None	None	None	None	None	None	None	None	None	None	None	None	None
181.m08049	CNAG_00305	YDR214W	AHA1	SPBC1711.08	None	orf19.7602	ca6002	IPF661	KOG2936	S	Uncharacterized conserved protein	chaperone activator	Co-chaperone that binds to Hsp82p and activates its ATPase activity; similar to Hch1p; expression is regulated by stresses such as heat shock	chaperone activator Aha1 (predicted)	unknown function	None	None	None	None	Sce_HS-up_2.0	None	None	None	None	None	None	Spo_XS-dw_2.0	Spo_Cd-up_2.0	None	None	None	None	None	None	None	None	None	None	None	None	None	None	None	None	None	None	None	Cal_Cd-up_1.5	None
181.m08051	CNAG_00308	None	None	SPAC24C9.08	None	None	None	None	KOG2275	E	Aminoacylase ACY1 and related metalloexopeptidases	gly-X carboxypeptidase	None	vacuolar carboxypeptidase (predicted)	None	None	None	None	None	None	None	None	None	None	None	Spo_XS-up_2.0	None	Spo_Cd-up_2.0	None	None	None	None	None	None	None	None	None	None	None	None	None	None	None	None	None	None	None	None	None
181.m08053	CNAG_00311	YDR036C	EHD3	SPBC2D10.09	None	orf19.3029	ca5060	IPF3690	None	None	None	3-hydroxyisobutyryl-CoA hydrolase	3-hydroxyisobutyryl-CoA hydrolase, member of a family of enoyl-CoA hydratase/isomerases; non-tagged protein is detected in highly purified mitochondria in high-throughput studies; phosphorylated; mutation affects fluid-phase endocytosis	3-hydroxyisobutyryl-CoA hydrolase	unknown function	None	None	None	None	None	None	None	None	None	None	None	None	None	None	None	None	None	None	None	None	None	None	None	None	Cal_OS-up_1.5	None	None	None	None	None	None	None	None	None
181.m08055	CNAG_00313	None	None	None	None	None	None	None	KOG2352	E	Predicted spermine/spermidine synthase	conserved hypothetical protein	None	None	None	None	None	None	None	None	None	None	None	None	None	None	None	None	None	None	None	None	None	None	None	None	None	None	None	None	None	None	None	None	None	None	None	None	None
181.m08064	CNAG_00320	YBL084C	CDC27	SPAC17C9.01c	nuc2	orf19.3231	ca5429	CDC27	KOG1126	D	DNA-binding cell division cycle control protein	ubiquitin-protein ligase	Subunit of the Anaphase-Promoting Complex/Cyclosome (APC/C), which is a ubiquitin-protein ligase required for degradation of anaphase inhibitors, including mitotic cyclins, during the metaphase/anaphase transition	anaphase-promoting complex subunit Apc3	subunit of anaphase-promoting complex (by homology)	Sce_OS-up_2.0	None	None	None	Sce_HS-up_2.0	None	None	None	None	None	None	None	None	None	None	None	None	None	None	None	None	None	None	None	None	None	None	None	None	None	None	None	None	None
181.m08083	CNAG_00375	YGR252W	GCN5	SPAC1952.05	gcn5	orf19.705	ca1705	GCN5	KOG1472	BK	Histone acetyltransferase SAGA/ADA, catalytic subunit PCAF/GCN5 and related proteins	transcriptional activator gcn5	Histone acetyltransferase, acetylates N-terminal lysines on histones H2B and H3; catalytic subunit of the ADA and SAGA histone acetyltransferase complexes; founding member of the Gcn5p-related N-acetyltransferase superfamily	histone acetyltransferase Gcn5	Histone acetyltransferase (by homology)	None	None	None	None	None	None	None	None	None	Spo_OS-dw_2.0	None	None	None	None	None	None	None	None	None	None	None	None	None	None	None	None	None	None	None	None	None	None	None	None
181.m08090	CNAG_00369	YHR058C	MED6	SPAC1002.15c	pmc5	orf19.7420	ca5716	MED6	KOG3169	K	RNA polymerase II transcriptional regulation mediator	conserved hypothetical protein	Subunit of the RNA polymerase II mediator complex; associates with core polymerase subunits to form the RNA polymerase II holoenzyme; essential for transcriptional regulation	mediator complex subunit Pmc5	RNA polymerase II transcriptional regulation mediator (by homology)	None	None	None	None	None	None	None	None	None	None	None	None	None	None	None	None	None	None	None	None	None	None	None	None	None	None	None	None	None	None	None	None	None	None
181.m08105	CNAG_00352	None	None	SPAC3H5.04	aar2	None	None	None	KOG3937	A	mRNA splicing factor	conserved hypothetical protein	None	U5 snRNP-associated protein Aar2	None	None	None	None	None	None	None	None	None	None	None	None	None	None	None	None	None	None	None	None	None	None	None	None	None	None	None	None	None	None	None	None	None	None	None
181.m08156	CNAG_00410	None	None	SPBC16H5.12c	None	orf19.216	ca3032	IPF12319	None	None	None	conserved hypothetical protein	None	conserved fungal protein	unknown function	None	None	None	None	None	None	None	None	None	None	None	None	None	None	None	None	None	None	None	None	None	None	None	None	None	None	None	None	None	None	None	None	None	None
181.m08220	CNAG_00485	None	None	None	None	None	None	None	None	None	None	conserved hypothetical protein	None	None	None	None	None	None	None	None	None	None	None	None	None	None	None	None	None	None	None	None	None	None	None	None	None	None	None	None	None	None	None	None	None	None	None	None	None
181.m08268	CNAG_00528	None	None	None	None	None	None	None	KOG0266	R	WD40 repeat-containing protein	WD-repeat protein	None	None	None	None	None	None	None	None	None	None	None	None	None	None	None	None	None	None	None	None	None	None	None	None	None	None	None	None	None	None	None	None	None	None	None	None	None
181.m08327	CNAG_00594	YLR020C	YEH2	SPBC16A3.12c	None	orf19.1887	ca4480	IPF6464	KOG2624	I	Triglyceride lipase-cholesterol esterase	lipid particle protein	Steryl ester hydrolase, catalyzes steryl ester hydrolysis at the plasma membrane; involved in sterol metabolism	triglyceride lipase-cholesterol esterase (predicted)	putative triacylglycerol lipase (by homology)	None	None	None	None	None	None	None	None	None	None	None	None	None	None	None	None	None	None	None	None	None	None	None	None	None	None	None	None	None	None	None	None	None	None
181.m08348	CNAG_00619	None	None	None	None	None	None	None	KOG2512	O	Beta-tubulin folding cofactor C	tubulin folding cofactor C	None	None	None	None	None	None	None	None	None	None	None	None	None	None	None	None	None	None	None	None	None	None	None	None	None	None	None	None	None	None	None	None	None	None	None	None	None
181.m08370	CNAG_00642	None	None	None	None	None	None	None	KOG0994	W	Extracellular matrix glycoprotein Laminin subunit beta	conserved hypothetical protein	None	None	None	None	None	None	None	None	None	None	None	None	None	None	None	None	None	None	None	None	None	None	None	None	None	None	None	None	None	None	None	None	None	None	None	None	None
181.m08380	CNAG_00649	YGL026C	TRP5	SPAC19A8.15	trp2	orf19.4718	ca1580	TRP5	KOG1395	E	Tryptophan synthase beta chain	tryptophan synthase	Tryptophan synthase involved in tryptophan biosynthesis, regulated by the general control system of amino acid biosynthesis	tryptophan synthase (predicted)	tryptophan synthase (by homology)	None	None	Sce_XS-up_2.0	None	None	None	None	None	None	None	None	None	None	None	None	None	None	None	None	None	None	None	None	None	None	None	None	None	None	None	None	None	None	None
181.m08397	CNAG_00672	YDR025W	RPS11A	SPAC31G5.03	rps1101	orf19.4149.1	None	None	KOG1728	J	40S ribosomal protein S11	ribosomal protein S11	Protein component of the small (40S) ribosomal subunit; identical to Rps11Bp and has similarity to E. coli S17 and rat S11 ribosomal proteins	40S ribosomal protein S11	None	None	Sce_OS-dw_2.0	None	Sce_XS-dw_2.0	None	Sce_HS-dw_2.0	None	Sce_CSR-dw_2.0	None	None	None	Spo_XS-dw_2.0	None	None	None	None	None	None	None	None	None	None	None	None	None	None	None	None	None	None	None	None	None	None
181.m08410	CNAG_00686	None	None	None	None	None	None	None	None	None	None	conserved hypothetical protein	None	None	None	None	None	None	None	None	None	None	None	None	None	None	None	None	None	None	None	None	None	None	None	None	None	None	None	None	None	None	None	None	None	None	None	None	None
181.m08415	CNAG_00691	None	None	None	None	None	None	None	None	None	None	conserved hypothetical protein	None	None	None	None	None	None	None	None	None	None	None	None	None	None	None	None	None	None	None	None	None	None	None	None	None	None	None	None	None	None	None	None	None	None	None	None	None
181.m08432	CNAG_00711	None	None	None	None	None	None	None	None	None	None	conserved hypothetical protein	None	None	None	None	None	None	None	None	None	None	None	None	None	None	None	None	None	None	None	None	None	None	None	None	None	None	None	None	None	None	None	None	None	None	None	None	None
181.m08449	CNAG_00727	YPL224C	MMT2	SPCC1020.03	None	orf19.52	ca2599	IPF11176	KOG1485	P	Mitochondrial Fe2+ transporter MMT1 and related transporters (cation diffusion facilitator superfamily)	mitochondrial protein with role in iron accumulation	Putative metal transporter involved in mitochondrial iron accumulation; closely related to Mmt1p	mitochondrial iron ion transporter	similar to Saccharomyces cerevisiae Mmt2p mitochondrial iron transporter (by homology)	None	None	None	None	Sce_HS-up_2.0	None	None	None	None	None	Spo_XS-up_2.0	None	Spo_Cd-up_2.0	None	None	None	None	None	None	None	None	None	None	None	None	None	None	None	None	None	None	None	None	None
181.m08472	CNAG_00753	None	None	None	None	None	None	None	KOG0980	Z	Actin-binding protein SLA2/Huntingtin-interacting protein Hip1	conserved hypothetical protein	None	None	None	None	None	None	None	None	None	None	None	None	None	None	None	None	None	None	None	None	None	None	None	None	None	None	None	None	None	None	None	None	None	None	None	None	None
181.m08478	CNAG_00759	None	None	None	None	None	None	None	KOG1984	U	Vesicle coat complex COPII, subunit SFB3	conserved hypothetical protein	None	None	None	None	None	None	None	None	None	None	None	None	None	None	None	None	None	None	None	None	None	None	None	None	None	None	None	None	None	None	None	None	None	None	None	None	None
181.m08500	CNAG_00781	YLR438C-A	LSM3	SPBC9B6.05c	lsm3	orf19.6135.1	ca3420	SMX4	KOG3460	A	Small nuclear ribonucleoprotein (snRNP) LSM3	conserved hypothetical protein	Lsm (Like Sm) protein; part of heteroheptameric complexes (Lsm2p-7p and either Lsm1p or 8p): cytoplasmic Lsm1p complex involved in mRNA decay; nuclear Lsm8p complex part of U6 snRNP and possibly involved in processing tRNA, snoRNA, and rRNA	U6 snRNP-associated protein Lsm3	U6 snRNA-associated Sm-like protein (by homology)	None	None	None	None	None	None	None	None	None	None	None	None	None	None	None	None	None	None	None	None	None	None	None	None	None	None	None	None	None	None	None	None	None	None
181.m08515	CNAG_00795	None	None	None	None	None	None	None	None	None	None	conserved hypothetical protein	None	None	None	None	None	None	None	None	None	None	None	None	None	None	None	None	None	None	None	None	None	None	None	None	None	None	None	None	None	None	None	None	None	None	None	None	None
181.m08523	CNAG_00804	YML121W	GTR1	SPBC337.13c	gtr1	orf19.3617	ca1677	GTR1	KOG3886	T	GTP-binding protein	Gtr1/RagA G protein Gtr1	Cytoplasmic GTP binding protein and negative regulator of the Ran/Tc4 GTPase cycle; component of GSE complex, which is required for sorting of Gap1p; involved in phosphate transport and telomeric silencing; similar to human RagA and RagB	Gtr1/RagA G protein Gtr1	GTP-binding protein by homology	None	None	None	None	None	None	None	None	None	None	None	None	None	None	None	None	None	None	None	None	None	None	None	None	None	None	None	None	None	None	None	None	None	None
181.m08529	CNAG_00810	None	None	SPAC23C11.04c	pnk1	orf19.1547	ca3975	IPF20152	KOG2134	L	Polynucleotide kinase 3' phosphatase	polynucleotide kinase 3' phosphatase	None	DNA kinase/phosphatase Pnk1	unknown function	None	None	None	None	None	None	None	None	None	None	None	None	None	None	None	None	None	None	None	None	None	None	None	None	None	None	None	None	None	None	None	None	None	None
181.m08530	CNAG_00811	YDR354W	TRP4	SPBC16G5.08	trp4	orf19.3099	ca4410	TRP4	KOG1438	E	Anthranilate phosphoribosyltransferase	anthranilate phosphoribosyltransferase	Anthranilate phosphoribosyl transferase of the tryptophan biosynthetic pathway, catalyzes the phosphoribosylation of anthranilate, subject to the general control system of amino acid biosynthesis	phosphoribosylanthranilate transferase Trp4	Anthranilate phosphoribosyltransferase	None	None	None	None	None	None	None	None	None	None	None	None	None	None	None	None	None	None	None	None	None	None	None	None	None	None	None	None	None	None	None	None	None	None
181.m08555	CNAG_00834	None	None	None	None	None	None	None	KOG2419	I	Phosphatidylserine decarboxylase	phosphatidylserine decarboxylase	None	None	None	None	None	None	None	None	None	None	None	None	None	None	None	None	None	None	None	None	None	None	None	None	None	None	None	None	None	None	None	None	None	None	None	None	None
181.m08719	CNAG_00164	None	None	None	None	None	None	None	KOG4294	PT	Non voltage-gated ion channels (DEG/ENaC family)	conserved hypothetical protein	None	None	None	None	None	None	None	None	None	None	None	None	None	None	None	None	None	None	None	None	None	None	None	None	None	None	None	None	None	None	None	None	None	None	None	None	None
181.m08752	CNAG_00361	YDR388W	RVS167	SPBC21D10.12	hob1	orf19.1220	ca1531	RVS167	KOG3771	U	Amphiphysin	Hob1p	Actin-associated protein, subunit of a complex (Rvs161p-Rvs167p) involved in regulation of actin cytoskeleton, endocytosis, and viability following starvation or osmotic stress; homolog of mammalian amphiphysin	BAR adaptor protein Hob1	(putative) cytoskeletal protein (by homology)	None	None	None	None	None	None	None	None	None	None	None	None	None	None	None	None	None	None	None	None	None	None	None	None	None	None	None	None	None	None	None	None	None	None
181.m08759	CNAG_00356	YDR346C	SVF1	SPCC584.11c	None	orf19.6068	ca4928	IPF1399	None	None	None	survival factor 1	Protein with a potential role in cell survival pathways, required for the diauxic growth shift; expression in mammalian cells increases survival under conditions inducing apoptosis	Svf1 family protein Svf1	unknown function	None	Sce_OS-dw_2.0	None	Sce_XS-dw_2.0	None	Sce_HS-dw_2.0	None	Sce_CSR-dw_2.0	None	None	None	None	None	None	None	None	None	None	None	Cal_XS-dw	None	None	None	Cal_SSR.XS-dw	None	None	None	None	None	None	None	None	None	None
181.m08762	CNAG_00387	None	None	None	None	None	None	None	KOG4567	R	GTPase-activating protein	conserved hypothetical protein	None	None	None	None	None	None	None	None	None	None	None	None	None	None	None	None	None	None	None	None	None	None	None	None	None	None	None	None	None	None	None	None	None	None	None	None	None
181.m08770	CNAG_00452	None	None	None	None	None	None	None	KOG0141	EI	Isovaleryl-CoA dehydrogenase	isovaleryl-CoA dehydrogenase 2	None	None	None	None	None	None	None	None	None	None	None	None	None	None	None	None	None	None	None	None	None	None	None	None	None	None	None	None	None	None	None	None	None	None	None	None	None
181.m08789	CNAG_00564	None	None	None	None	None	None	None	KOG1215	T	Low-density lipoprotein receptors containing Ca2+-binding EGF-like domains	conserved hypothetical protein	None	None	None	None	None	None	None	None	None	None	None	None	None	None	None	None	None	None	None	None	None	None	None	None	None	None	None	None	None	None	None	None	None	None	None	None	None
181.m08838	CNAG_00052	None	None	None	None	None	None	None	None	None	None	conserved hypothetical protein	None	None	None	None	None	None	None	None	None	None	None	None	None	None	None	None	None	None	None	None	None	None	None	None	None	None	None	None	None	None	None	None	None	None	None	None	None
183.m01589	CNAG_07925	None	None	None	None	None	None	None	KOG4674	S	Uncharacterized conserved coiled-coil protein	conserved hypothetical protein	None	None	None	None	None	None	None	None	None	None	None	None	None	None	None	None	None	None	None	None	None	None	None	None	None	None	None	None	None	None	None	None	None	None	None	None	None
183.m01595	CNAG_07921	None	None	None	None	None	None	None	None	None	None	conserved hypothetical protein	None	None	None	None	None	None	None	None	None	None	None	None	None	None	None	None	None	None	None	None	None	None	None	None	None	None	None	None	None	None	None	None	None	None	None	None	None
183.m01609	CNAG_06293	None	None	None	None	None	None	None	None	None	None	conserved hypothetical protein	None	None	None	None	None	None	None	None	None	None	None	None	None	None	None	None	None	None	None	None	None	None	None	None	None	None	None	None	None	None	None	None	None	None	None	None	None
183.m01614	CNAG_06298	None	None	None	None	None	None	None	None	None	None	conserved hypothetical protein	None	None	None	None	None	None	None	None	None	None	None	None	None	None	None	None	None	None	None	None	None	None	None	None	None	None	None	None	None	None	None	None	None	None	None	None	None
183.m01624	None	None	None	None	None	None	None	None	None	None	None	None	None	None	None	None	None	None	None	None	None	None	None	None	None	None	None	None	None	None	None	None	None	None	None	None	None	None	None	None	None	None	None	None	None	None	None	None	None
183.m01655	CNAG_06356	YKL027W	None	SPAC1A6.10	None	orf19.2115	ca2730	IPF10325	KOG2018	O	Predicted dinucleotide-utilizing enzyme involved in molybdopterin and thiamine biosynthesis	mitochondrial protein	None	Moeb/ThiF domain	molybdopterin-converting factor by homology	None	None	None	Sce_XS-dw_2.0	None	None	None	None	None	None	None	None	None	None	None	None	None	None	None	Cal_XS-dw	None	Cal_HS-dw	None	None	None	None	None	None	None	None	None	None	None	None
183.m01656	CNAG_06357	None	None	None	None	None	None	None	KOG4852	S	Uncharacterized conserved protein	conserved hypothetical protein	None	None	None	None	None	None	None	None	None	None	None	None	None	None	None	None	None	None	None	None	None	None	None	None	None	None	None	None	None	None	None	None	None	None	None	None	None
183.m01709	CNAG_06418	YCR079W	PTC6	SPAC4A8.03c	ptc4	orf19.3705	ca0941	IPF8617	KOG0698	T	Serine/threonine protein phosphatase	PP2Cc protein phosphatase	Mitochondrial type 2C protein phosphatase involved in regulation of pyruvate dehydrogenase activity by dephosphorylating the ser-133 residue of the Pda1p subunit; acts in concert with kinases Pkp1p and Pkp2p and phosphatase Ptc5p	protein phosphatase 2C Ptc4	unknown function	None	None	None	Sce_XS-dw_2.0	Sce_HS-up_2.0	None	None	None	Spo_OS-up_2.0	None	Spo_XS-up_2.0	None	Spo_Cd-up_2.0	None	Spo_CESR-up	None	None	None	None	None	None	None	None	None	None	None	None	None	None	None	None	None	None	None
183.m01716	CNAG_06425	YLR014C	PPR1	None	None	orf19.3986	ca4758	PPR1	None	None	None	fungal specific transcription factor	Zinc finger transcription factor containing a Zn(2)-Cys(6) binuclear cluster domain, positively regulates transcription of genes involved in uracil biosynthesis; activity may be modulated by interaction with Tup1p	None	transcription factor regulating pyrimidine pathway (by homology)	None	None	None	Sce_XS-dw_2.0	None	Sce_HS-dw_2.0	None	None	None	None	None	None	None	None	None	None	None	None	None	None	None	None	None	None	None	None	None	None	None	None	None	None	None	None
183.m01740	CNAG_06453	None	None	SPBC725.10	None	None	None	None	KOG3797	T	Peripheral-type benzodiazepine receptor and related proteins	conserved hypothetical protein	None	tspO homolog	None	None	None	None	None	None	None	None	None	Spo_OS-up_2.0	None	Spo_XS-up_2.0	None	Spo_Cd-up_2.0	None	Spo_CESR-up	None	None	None	None	None	None	None	None	None	None	None	None	None	None	None	None	None	None	None
183.m01747	CNAG_07942	YLR310C	CDC25	None	None	None	None	None	KOG3417	T	Ras1 guanine nucleotide exchange factor	cell division control protein 25	Membrane bound guanine nucleotide exchange factor (GEF or GDP-release factor); indirectly regulates adenylate cyclase through activation of Ras1p and Ras2p by stimulating the exchange of GDP for GTP; required for progression through G1	None	None	None	None	None	Sce_XS-dw_2.0	None	None	None	None	None	None	None	None	None	None	None	None	None	None	None	None	None	None	None	None	None	None	None	None	None	None	None	None	None	None
183.m01759	None	None	None	None	None	None	None	None	None	None	None	None	None	None	None	None	None	None	None	None	None	None	None	None	None	None	None	None	None	None	None	None	None	None	None	None	None	None	None	None	None	None	None	None	None	None	None	None	None
183.m01901	CNAG_06504	None	None	None	None	None	None	None	KOG1187	T	Serine/threonine protein kinase	conserved hypothetical protein	None	None	None	None	None	None	None	None	None	None	None	None	None	None	None	None	None	None	None	None	None	None	None	None	None	None	None	None	None	None	None	None	None	None	None	None	None
184.m04328	None	None	None	None	None	None	None	None	None	None	None	None	None	None	None	None	None	None	None	None	None	None	None	None	None	None	None	None	None	None	None	None	None	None	None	None	None	None	None	None	None	None	None	None	None	None	None	None	None
184.m04376	CNAG_05386	YDR300C	PRO1	SPAC17H9.13c	None	orf19.7638	ca6031	PRO1	KOG1154	E	Gamma-glutamyl kinase	glutamate 5-kinase	Gamma-glutamyl kinase, catalyzes the first step in proline biosynthesis	glutamate 5-kinase (predicted)	glutamate 5-kinase (by homology)	None	None	None	Sce_XS-dw_2.0	None	Sce_HS-dw_2.0	None	None	None	None	None	None	None	None	None	None	None	None	None	None	None	None	None	None	None	None	None	None	Cal_XS-up_1.5	None	None	None	None	None
184.m04393	CNAG_05405	None	None	None	None	None	None	None	KOG1510	K	RNA polymerase II holoenzyme and mediator subcomplex, subunit SURB7/SRB7	predicted protein	None	None	None	None	None	None	None	None	None	None	None	None	None	None	None	None	None	None	None	None	None	None	None	None	None	None	None	None	None	None	None	None	None	None	None	None	None
184.m04432	CNAG_00306	None	None	None	None	None	None	None	KOG1836	W	Extracellular matrix glycoprotein Laminin subunits alpha and gamma	conserved hypothetical protein	None	None	None	None	None	None	None	None	None	None	None	None	None	None	None	None	None	None	None	None	None	None	None	None	None	None	None	None	None	None	None	None	None	None	None	None	None
184.m04442	CNAG_05462	YKL150W	MCR1	None	None	orf19.3507	ca2457	MCR1	KOG0534	HC	NADH-cytochrome b-5 reductase	cytochrome-b5 reductase	Mitochondrial NADH-cytochrome b5 reductase, involved in ergosterol biosynthesis	None	NADH-cytochrome-b5 reductase (by homology)	Sce_OS-up_2.0	None	Sce_XS-up_2.0	None	Sce_HS-up_2.0	None	Sce_CSR-up_2.0	None	None	None	None	None	None	None	None	None	None	None	None	None	None	None	None	None	Cal_OS-up_1.5	None	Cal_OS-up_2.0	None	None	None	None	None	None	None
184.m04637	None	None	None	None	None	None	None	None	None	None	None	None	None	None	None	None	None	None	None	None	None	None	None	None	None	None	None	None	None	None	None	None	None	None	None	None	None	None	None	None	None	None	None	None	None	None	None	None	None
184.m04638	None	None	None	None	None	None	None	None	None	None	None	None	None	None	None	None	None	None	None	None	None	None	None	None	None	None	None	None	None	None	None	None	None	None	None	None	None	None	None	None	None	None	None	None	None	None	None	None	None
184.m04651	CNAG_05315	None	None	None	None	None	None	None	None	None	None	taurine catabolism dioxygenase TauD	None	None	None	None	None	None	None	None	None	None	None	None	None	None	None	None	None	None	None	None	None	None	None	None	None	None	None	None	None	None	None	None	None	None	None	None	None
184.m04710	CNAG_05253	None	None	None	None	None	None	None	None	None	None	conserved hypothetical protein	None	None	None	None	None	None	None	None	None	None	None	None	None	None	None	None	None	None	None	None	None	None	None	None	None	None	None	None	None	None	None	None	None	None	None	None	None
184.m04798	CNAG_05150	None	None	None	None	None	None	None	KOG0058	U	Peptide exporter, ABC superfamily	ATP-binding cassette	None	None	None	None	None	None	None	None	None	None	None	None	None	None	None	None	None	None	None	None	None	None	None	None	None	None	None	None	None	None	None	None	None	None	None	None	None
184.m04801	CNAG_05145	None	None	None	None	None	None	None	KOG1802	A	RNA helicase nonsense mRNA reducing factor (pNORF1)	DNA helicase	None	None	None	None	None	None	None	None	None	None	None	None	None	None	None	None	None	None	None	None	None	None	None	None	None	None	None	None	None	None	None	None	None	None	None	None	None
184.m04840	CNAG_05104	None	None	None	None	None	None	None	KOG0583	T	Serine/threonine protein kinase	CAMK-group protein kinase	None	None	None	None	None	None	None	None	None	None	None	None	None	None	None	None	None	None	None	None	None	None	None	None	None	None	None	None	None	None	None	None	None	None	None	None	None
184.m04991	CNAG_04935	None	None	None	None	None	None	None	KOG0516	Z	Dystonin, GAS (Growth-arrest-specific protein), and related proteins	conserved hypothetical protein	None	None	None	None	None	None	None	None	None	None	None	None	None	None	None	None	None	None	None	None	None	None	None	None	None	None	None	None	None	None	None	None	None	None	None	None	None
184.m04992	CNAG_05320	None	None	None	None	None	None	None	KOG2741	GQ	Dimeric dihydrodiol dehydrogenase	oxidoreductase family protein	None	None	None	None	None	None	None	None	None	None	None	None	None	None	None	None	None	None	None	None	None	None	None	None	None	None	None	None	None	None	None	None	None	None	None	None	None
184.m05073	CNAG_05440	YBR035C	PDX3	SPAC1093.02	None	orf19.550	ca4261	PDX3	KOG2586	H	Pyridoxamine-phosphate oxidase	pyridoxamine-phosphate oxidase	Pyridoxine (pyridoxamine) phosphate oxidase, has homologs in E. coli and Myxococcus xanthus; transcription is under the general control of nitrogen metabolism	pyridoxamine 5'-phosphate oxidase (predicted)	pyridoxamine-phosphate oxidase (by homology)	None	None	None	None	None	None	None	None	None	None	None	None	Spo_Cd-up_2.0	None	None	None	None	None	None	None	None	None	None	None	None	None	None	None	Cal_XS-up_1.5	None	None	None	None	None
184.m05204	CNAG_05012	None	None	None	None	None	None	None	KOG3544	W	Collagens (type IV and type XIII), and related proteins	conserved hypothetical protein	None	None	None	None	None	None	None	None	None	None	None	None	None	None	None	None	None	None	None	None	None	None	None	None	None	None	None	None	None	None	None	None	None	None	None	None	None
184.m05220	CNAG_07883	None	None	None	None	None	None	None	KOG1650	P	Predicted K+/H+-antiporter	conserved hypothetical protein	None	None	None	None	None	None	None	None	None	None	None	None	None	None	None	None	None	None	None	None	None	None	None	None	None	None	None	None	None	None	None	None	None	None	None	None	None
185.m02345	CNAG_06602	None	None	SPCC757.03c	None	None	None	None	None	None	None	cysteine-type peptidase	None	ThiJ domain protein	None	None	None	None	None	None	None	None	None	Spo_OS-up_2.0	None	Spo_XS-up_2.0	None	Spo_Cd-up_2.0	None	Spo_CESR-up	None	None	None	None	None	None	None	None	None	None	None	None	None	None	None	None	None	None	None
185.m02348	CNAG_04566	None	None	None	None	None	None	None	KOG0916	M	1,3-beta-glucan synthase/callose synthase catalytic subunit	beta-flanking protein	None	None	None	None	None	None	None	None	None	None	None	None	None	None	None	None	None	None	None	None	None	None	None	None	None	None	None	None	None	None	None	None	None	None	None	None	None
185.m02362	CNAG_07860	None	None	None	None	None	None	None	KOG0883	O	Cyclophilin type, U box-containing peptidyl-prolyl cis-trans isomerase	peptidyl-prolyl cis-trans isomerase-like 2	None	None	None	None	None	None	None	None	None	None	None	None	None	None	None	None	None	None	None	None	None	None	None	None	None	None	None	None	None	None	None	None	None	None	None	None	None
185.m02381	CNAG_04597	None	None	None	None	None	None	None	KOG2816	R	Predicted transporter ADD1 (major facilitator superfamily)	conserved hypothetical protein	None	None	None	None	None	None	None	None	None	None	None	None	None	None	None	None	None	None	None	None	None	None	None	None	None	None	None	None	None	None	None	None	None	None	None	None	None
185.m02388	CNAG_04604	YOL097C	WRS1	SPAC2F7.13c	None	orf19.5226	ca1973	WRS1	KOG2145	J	Cytoplasmic tryptophanyl-tRNA synthetase	tryptophan-tRNA ligase	Cytoplasmic tryptophanyl-tRNA synthetase, aminoacylates tryptophanyl-tRNA	tryptophan-tRNA ligase (predicted)	tryptophan--tRNA ligase	None	Sce_OS-dw_2.0	None	Sce_XS-dw_2.0	None	Sce_HS-dw_2.0	None	Sce_CSR-dw_2.0	None	None	None	None	None	None	None	None	None	None	None	None	None	None	None	None	None	None	None	None	None	Cal_XS-dw_1.5	None	None	None	None
185.m02435	CNAG_04650	YLR085C	ARP6	SPCC550.12	arp6	orf19.4904	ca0593	ARP6	KOG0680	Z	Actin-related protein - Arp6p	actin-like protein ARP6	Actin-related protein that binds nucleosomes; a component of the SWR1 complex, which exchanges histone variant H2AZ (Htz1p) for chromatin-bound histone H2A	actin-like protein Arp6	actin-related protein (by homology)	None	None	None	None	None	None	None	None	None	None	None	None	None	None	None	None	None	None	None	None	None	None	None	None	None	None	None	None	None	None	None	None	None	None
185.m02477	CNAG_04699	None	None	SPAC1782.03	None	None	None	None	KOG1425	Z	Microfibrillar-associated protein MFAP1	conserved hypothetical protein	None	microfibrillar-associated protein family protein	None	None	None	None	None	None	None	None	None	None	None	None	None	None	None	None	None	None	None	None	None	None	None	None	None	None	None	None	None	None	None	None	None	None	None
185.m02483	CNAG_04704	YKL217W	JEN1	None	None	orf19.5307	ca5478	JEN2	None	None	None	carboxylic acid transport protein	Lactate transporter, required for uptake of lactate and pyruvate; phosphorylated; expression is derepressed by transcriptional activator Cat8p during respiratory growth, and repressed in the presence of glucose, fructose, and mannose	None	carboxylic acid transporter protein (by homology)	None	None	None	Sce_XS-dw_2.0	Sce_HS-up_2.0	None	None	None	None	None	None	None	None	None	None	None	None	None	None	None	None	None	None	None	None	None	None	None	None	None	None	None	None	None
185.m02486	CNAG_04707	None	None	None	None	None	None	None	None	None	None	conserved hypothetical protein	None	None	None	None	None	None	None	None	None	None	None	None	None	None	None	None	None	None	None	None	None	None	None	None	None	None	None	None	None	None	None	None	None	None	None	None	None
185.m02669	CNAG_04892	None	None	None	None	None	None	None	None	None	None	conserved hypothetical protein	None	None	None	None	None	None	None	None	None	None	None	None	None	None	None	None	None	None	None	None	None	None	None	None	None	None	None	None	None	None	None	None	None	None	None	None	None
185.m02681	CNAG_04903	None	None	None	None	None	None	None	KOG1808	R	AAA ATPase containing von Willebrand factor type A (vWA) domain	conserved hypothetical protein	None	None	None	None	None	None	None	None	None	None	None	None	None	None	None	None	None	None	None	None	None	None	None	None	None	None	None	None	None	None	None	None	None	None	None	None	None
186.m03424	CNAG_06791	None	None	None	None	None	None	None	None	None	None	conserved hypothetical protein	None	None	None	None	None	None	None	None	None	None	None	None	None	None	None	None	None	None	None	None	None	None	None	None	None	None	None	None	None	None	None	None	None	None	None	None	None
186.m03464	CNAG_06752	None	None	None	None	None	None	None	KOG4308	S	LRR-containing protein	conserved hypothetical protein	None	None	None	None	None	None	None	None	None	None	None	None	None	None	None	None	None	None	None	None	None	None	None	None	None	None	None	None	None	None	None	None	None	None	None	None	None
186.m03495	CNAG_07464	YDL056W	MBP1	SPAC22F3.09c	res2	orf19.4545	ca4203	SWI4.3f	None	None	None	transcription factor	Transcription factor involved in regulation of cell cycle progression from G1 to S phase, forms a complex with Swi6p that binds to MluI cell cycle box regulatory element in promoters of DNA synthesis genes	MBF transcription factor complex subunit Res2	transcription factor (by homology)	None	None	None	None	None	None	None	None	None	None	Spo_XS-up_2.0	None	None	None	None	None	None	None	None	None	None	None	None	None	None	None	None	None	None	Cal_XS-dw_1.5	None	None	None	None
186.m03525	CNAG_03604	YPR107C	YTH1	SPAC227.08c	yth1	orf19.6881	ca4569	IPF9552	KOG1040	A	Polyadenylation factor I complex, subunit, Yth1 (CPSF subunit)	no arches protein	Essential RNA-binding component of cleavage and polyadenylation factor, contains five zinc fingers; required for pre-mRNA 3'-end processing and polyadenylation	zinc finger protein Yth1	unknown function	None	None	Sce_XS-up_2.0	None	None	None	None	None	None	None	None	None	None	None	None	None	None	None	None	None	None	None	None	None	None	None	None	None	Cal_XS-up_1.5	None	Cal_XS-up_2.0	None	None	None
186.m03536	CNAG_07470	YOR360C	PDE2	None	None	orf19.2972	ca3450	PDE2	KOG3689	T	Cyclic nucleotide phosphodiesterase	high-affinity phosphodiesterase	High-affinity cyclic AMP phosphodiesterase, component of the cAMP-dependent protein kinase signaling system, protects the cell from extracellular cAMP, contains readthrough motif surrounding termination codon	None	Nucleotide phosphodiesterase	None	None	None	None	None	None	None	None	None	None	None	None	None	None	None	None	None	None	None	None	None	None	None	None	None	None	None	None	Cal_XS-up_1.5	None	Cal_XS-up_2.0	None	None	None
186.m03703	CNAG_03782	None	None	None	None	None	None	None	KOG1870	O	Ubiquitin C-terminal hydrolase	conserved hypothetical protein	None	None	None	None	None	None	None	None	None	None	None	None	None	None	None	None	None	None	None	None	None	None	None	None	None	None	None	None	None	None	None	None	None	None	None	None	None
186.m03741	CNAG_03816	YJL001W	PRE3	SPBC4C3.10c	None	orf19.6991	ca5037	PRE3	KOG0174	O	20S proteasome, regulatory subunit beta type PSMB6/PSMB9/PRE3	proteasome subunit beta type 6	Beta 1 subunit of the 20S proteasome, responsible for cleavage after acidic residues in peptides	20S proteasome component beta 1	20S proteasome subunit (beta1)(by homology)	Sce_OS-up_2.0	None	Sce_XS-up_2.0	None	None	None	None	None	None	None	None	None	None	None	None	None	None	None	None	None	None	None	None	None	None	None	None	None	None	None	None	None	None	None
186.m03790	CNAG_03857	None	None	None	None	None	None	None	KOG1075	R	FOG: Reverse transcriptase	hypothetical protein	None	None	None	None	None	None	None	None	None	None	None	None	None	None	None	None	None	None	None	None	None	None	None	None	None	None	None	None	None	None	None	None	None	None	None	None	None
186.m03810	CNAG_03878	None	None	SPBC83.15	None	orf19.2185	ca1770	IPF12457	KOG3881	S	Uncharacterized conserved protein	conserved hypothetical protein	None	ribosome biogenesis protein Nsa1	unknown function	None	None	None	None	None	None	None	None	None	None	None	Spo_XS-dw_2.0	None	Spo_Cd-dw_2.0	None	Spo_CESR-dw	None	Cal_OS-dw	None	None	None	Cal_HS-dw	None	None	None	None	None	None	None	Cal_XS-dw_1.5	None	Cal_XS-dw_2.0	None	None
186.m03832	CNAG_03905	YKL160W	ELF1	SPAC1B3.02c	None	orf19.6623	ca4070	IPF2562	KOG3214	S	Uncharacterized Zn ribbon-containing protein	conserved hypothetical protein	Transcription elongation factor that contains a conserved zinc finger domain; implicated in the maintenance of proper chromatin structure in actively transcribed regions; deletion inhibits Brome mosaic virus (BMV) gene expression	transcription elongation factor, Elf1 family	unknown function	None	None	None	None	None	None	None	None	None	None	None	None	None	None	None	None	None	None	None	None	None	None	None	None	None	None	None	None	None	None	None	None	None	None
186.m03871	CNAG_03945	None	None	None	None	None	None	None	KOG3175	R	Protein phosphatase 4 regulatory subunit 2 related protein	conserved hypothetical protein	None	None	None	None	None	None	None	None	None	None	None	None	None	None	None	None	None	None	None	None	None	None	None	None	None	None	None	None	None	None	None	None	None	None	None	None	None
186.m03875	CNAG_03951	None	None	None	None	None	None	None	None	None	None	conserved hypothetical protein	None	None	None	None	None	None	None	None	None	None	None	None	None	None	None	None	None	None	None	None	None	None	None	None	None	None	None	None	None	None	None	None	None	None	None	None	None
186.m03887	CNAG_03964	None	None	SPAC683.02c	None	None	None	None	KOG4400	O	E3 ubiquitin ligase interacting with arginine methyltransferase	zinc knuckle family protein	None	zf-CCHC type zinc finger protein	None	None	None	None	None	None	None	None	None	None	None	None	Spo_XS-dw_2.0	None	Spo_Cd-dw_2.0	None	Spo_CESR-dw	None	None	None	None	None	None	None	None	None	None	None	None	None	None	None	None	None	None
186.m03970	CNAG_04040	YNR047W	None	SPAC4G8.05	ppk14	orf19.223	ca3029	IPF13825	KOG0610	R	Putative serine/threonine protein kinase	AGC/RSK protein kinase	None	serine/threonine protein kinase Ppk14 (predicted)	serine/threonine protein kinases (by homology)	None	None	Sce_XS-up_2.0	None	Sce_HS-up_2.0	None	None	None	None	None	None	None	None	None	None	None	None	None	None	None	None	None	None	None	None	None	None	None	Cal_XS-up_1.5	None	Cal_XS-up_2.0	None	None	None
186.m04015	CNAG_04092	None	None	None	None	None	None	None	KOG0254	R	Predicted transporter (major facilitator superfamily)	sugar transporter	None	None	None	None	None	None	None	None	None	None	None	None	None	None	None	None	None	None	None	None	None	None	None	None	None	None	None	None	None	None	None	None	None	None	None	None	None
186.m04036	CNAG_03667	None	None	None	None	None	None	None	KOG3819	S	Uncharacterized conserved proteins (Hepatitis delta antigen-interacting protein A)	conserved hypothetical protein	None	None	None	None	None	None	None	None	None	None	None	None	None	None	None	None	None	None	None	None	None	None	None	None	None	None	None	None	None	None	None	None	None	None	None	None	None
186.m04051	CNAG_03795	YML060W	OGG1	None	None	orf19.7190	ca5318	OGG1	None	None	None	purine-specific oxidized base lesion DNA N-glycosylase	Mitochondrial glycosylase/lyase that specifically excises 7,8-dihydro-8-oxoguanine residues located opposite cytosine or thymine residues in DNA, repairs oxidative damage to mitochondrial DNA	None	8-oxoguanine DNA glycosylase (by homology)	None	None	None	Sce_XS-dw_2.0	None	Sce_HS-dw_2.0	None	None	None	None	None	None	None	None	None	None	None	None	None	None	None	None	None	None	None	None	None	None	None	None	None	None	None	None
186.m04088	None	None	None	None	None	None	None	None	None	None	None	None	None	None	None	None	None	None	None	None	None	None	None	None	None	None	None	None	None	None	None	None	None	None	None	None	None	None	None	None	None	None	None	None	None	None	None	None	None
[truncated: 16 more columns]

## Sheet: H99 BCS Cu 1.5 fold
Gene ID/ name									Biological function							Stress Response Genes of S. cerevisiae								Stress Response Genes of S. pombe								Stress Response Genes of C. albicans (Enjalbert et al., 2003)								Stress Response Genes of C. albicans (Enjalbert et al., 2006)
C.neo (JEC21) ID	C.neo (H99) ID	Sce ID	Sce_Gene (SGD)	Spo ID	Spo_Gene (GeneDB)	Cal ID (SGTC)	Cal ID (CYGD)	Cal_Gene (CandiaDB)	KOGs ID	KOGs Catagory	KOGs Description	Cn.H99.v2 Description	Sce_Description (SGD)	Spo_Description (GeneDB)	Cal_Description (CandiaDB)	Sce_OS-up_2.0 (Gasch-00)	Sce_OS-dw_2.0 (Gasch-00)	Sce_XS-up_2.0 (Gasch-00)	Sce_XS-dw_2.0 (Gasch-00)	Sce_HS-up_2.0 (Gasch-00)	Sce_HS-dw_2.0 (Gasch-00)	Sce_SSR-up_2.0 (Gasch-00, Re-exam)	Sce_SSR-dw_2.0 (Gasch-00, Re-exam)	Spo_OS-up_2.0 (Chen-03)	Spo_OS-dw_2.0 (Chen-03)	Spo_XS-up_2.0 (Chen-03)	Spo_XS-dw_2.0 (Chen-03)	Spo_Cd-up_2.0 (Chen-03)	Spo_Cd-dw_2.0 (Chen-03)	Spo_SSR-up_2.0 (Chen-03)	Spo_SSR-dw_2.0 (Chen-03)	Cal_OS-up (Enjalbert-03)	Cal_OS-dw (Enjalbert-03)	Cal_XS-up (Enjalbert-03)	Cal_XS-dw (Enjalbert-03)	Cal_HS-up (Enjalbert-03)	Cal_HS-dw (Enjalbert-03)	Cal_SSR-up (Enjalbert-03)	Cal_SSR-dw (Enjalbert-03)	Cal_OS-up_1.5 (Enjalbert-06)	Cal_OS-dw_1.5 (Enjalbert-06)	Cal_OS-up_2.0 (Enjalbert-06)	Cal_OS-dw_2.0 (Enjalbert-06)	Cal_XS-up_1.5 (Enjalbert-06)	Cal_XS-dw_1.5 (Enjalbert-06)	Cal_XS-up_2.0 (Enjalbert-06)	Cal_XS-dw_2.0 (Enjalbert-06)	Cal_Cd-up_1.5 (Enjalbert-06)	Cal_Cd-dw_1.5 (Enjalbert-06)
162.m02345	CNAG_04330	None	None	None	None	None	None	None	KOG0781	U	Signal recognition particle receptor, alpha subunit	conserved hypothetical protein	None	None	None	None	None	None	None	None	None	None	None	None	None	None	None	None	None	None	None	None	None	None	None	None	None	None	None	None	None	None	None	None	None	None	None	None	None
162.m02715	CNAG_04387	YPR082C	DIB1	SPCC16A11.05c	dim1	orf19.1975	ca0468	DIB1	KOG3414	AD	Component of the U4/U6.U5 snRNP/mitosis protein DIM1	pre-mRNA splicing factor	17-kDa component of the U4/U6aU5 tri-snRNP, plays an essential role in pre-mRNA splicing, orthologue of hDIM1, the human U5-specific 15-kDa protein	U4/U6 x U5 tri-snRNP complex subunit Dim1	Component of the U4/U6.U5 snRNP (by homology)	None	None	None	None	None	None	None	None	None	None	None	None	None	None	None	None	None	None	None	None	None	None	None	None	None	None	None	None	None	None	None	None	None	None
162.m02726	CNAG_04388	YHR008C	SOD2	SPAC1486.01	None	orf19.7111.1	None	None	KOG0876	P	Manganese superoxide dismutase	mitochondrial superoxide dismutase Sod2	Mitochondrial superoxide dismutase, protects cells against oxygen toxicity; phosphorylated	manganese superoxide dismutase (AF069292)	None	None	None	Sce_XS-up_2.0	None	Sce_HS-up_2.0	None	None	None	None	None	None	None	Spo_Cd-up_2.0	None	None	None	None	None	None	None	None	None	None	None	None	None	None	None	None	None	None	None	None	None
162.m02987	CNAG_04377	YOL138C	RTC1	SPAC4F8.11	None	None	None	None	KOG0269	S	WD40 repeat-containing protein	vacuolar protein	Putative protein of unknown function; may interact with ribosomes, based on co-purification experiments; null mutation suppresses cdc13-1 temperature sensitivity	WD repeat protein, human WDR24 family	None	None	None	None	None	None	None	None	None	None	None	None	None	None	None	None	None	None	None	None	None	None	None	None	None	None	None	None	None	None	None	None	None	None	None
163.m03860	CNAG_01019	YJR104C	SOD1	SPAC821.10c	sod1	orf19.2770.1	ca4120	SOD1	KOG0441	P	Cu2+/Zn2+ superoxide dismutase SOD1	Cu/Zn superoxide dismutase	Cytosolic superoxide dismutase; some mutations are analogous to those that cause ALS (amyotrophic lateral sclerosis) in humans	superoxide dismutase Sod1	Cu,Zn-superoxide dismutase	None	None	Sce_XS-up_2.0	None	None	None	None	None	None	None	Spo_XS-up_2.0	None	None	None	None	None	None	None	None	None	None	None	None	None	None	None	None	None	None	None	None	None	None	None
163.m03930	CNAG_00979	YLR411W	CTR3	SPCC1393.10	ctr4	None	None	None	KOG3386	P	Copper transporter	copper uptake transporter	High-affinity copper transporter of the plasma membrane, acts as a trimer; gene is disrupted by a Ty2 transposon insertion in many laboratory strains of S. cerevisiae	copper transporter complex subunit Ctr4	None	None	None	None	None	None	None	None	None	None	None	None	None	None	None	None	None	None	None	None	None	None	None	None	None	None	None	None	None	None	None	None	None	None	None
163.m06465	CNAG_06949	None	None	None	None	None	None	None	None	None	None	hypothetical protein	None	None	None	None	None	None	None	None	None	None	None	None	None	None	None	None	None	None	None	None	None	None	None	None	None	None	None	None	None	None	None	None	None	None	None	None	None
163.m06562	None	None	None	None	None	None	None	None	None	None	None	None	None	None	None	None	None	None	None	None	None	None	None	None	None	None	None	None	None	None	None	None	None	None	None	None	None	None	None	None	None	None	None	None	None	None	None	None	None
167.m03169	CNAG_02549	None	None	None	None	None	None	None	KOG2517	G	Ribulose kinase and related carbohydrate kinases	conserved hypothetical protein	None	None	None	None	None	None	None	None	None	None	None	None	None	None	None	None	None	None	None	None	None	None	None	None	None	None	None	None	None	None	None	None	None	None	None	None	None
167.m03586	CNAG_02089	None	None	None	None	None	None	None	KOG4177	M	Ankyrin	conserved hypothetical protein	None	None	None	None	None	None	None	None	None	None	None	None	None	None	None	None	None	None	None	None	None	None	None	None	None	None	None	None	None	None	None	None	None	None	None	None	None
167.m03590	CNAG_02084	YJL167W	ERG20	SPAC6F12.13c	fps1	orf19.4491	ca1442	ERG20	KOG0711	H	Polyprenyl synthetase	farnesyl pyrophosphate synthetase	Farnesyl pyrophosphate synthetase, has both dimethylallyltranstransferase and geranyltranstransferase activities; catalyzes the formation of C15 farnesyl pyrophosphate units for isoprenoid and sterol biosynthesis	geranyltranstransferase Fps1	farnesyl-pyrophosphate synthetase	None	None	None	None	None	None	None	None	None	None	None	None	None	None	None	None	None	None	None	None	None	None	None	None	None	None	None	None	None	None	None	None	None	None
167.m05981	CNAG_02061	None	None	None	None	None	None	None	None	None	None	conserved hypothetical protein	None	None	None	None	None	None	None	None	None	None	None	None	None	None	None	None	None	None	None	None	None	None	None	None	None	None	None	None	None	None	None	None	None	None	None	None	None
176.m02142	None	None	None	None	None	None	None	None	None	None	None	None	None	None	None	None	None	None	None	None	None	None	None	None	None	None	None	None	None	None	None	None	None	None	None	None	None	None	None	None	None	None	None	None	None	None	None	None	None
176.m02277	CNAG_07533	None	None	None	None	None	None	None	None	None	None	conserved hypothetical protein	None	None	None	None	None	None	None	None	None	None	None	None	None	None	None	None	None	None	None	None	None	None	None	None	None	None	None	None	None	None	None	None	None	None	None	None	None
176.m02299	CNAG_02673	None	None	None	None	None	None	None	KOG1502	V	Flavonol reductase/cinnamoyl-CoA reductase	NAD dependent epimerase/dehydratase family protein	None	None	None	None	None	None	None	None	None	None	None	None	None	None	None	None	None	None	None	None	None	None	None	None	None	None	None	None	None	None	None	None	None	None	None	None	None
176.m02567	CNAG_01991	YNL052W	COX5A	SPCC338.10c	cox5	orf19.4759	ca2630	COX5A	KOG4075	C	Cytochrome c oxidase, subunit IV/COX5b	cytochrome c oxidase subunit V	Subunit Va of cytochrome c oxidase, which is the terminal member of the mitochondrial inner membrane electron transport chain; predominantly expressed during aerobic growth while its isoform Vb (Cox5Bp) is expressed during anaerobic growth	cytochrome c oxidase subunit V	cytochrome-c oxidase chain V.A precursor (by homology)	None	None	None	Sce_XS-dw_2.0	None	None	None	None	None	None	None	None	None	None	None	None	None	None	None	None	None	None	None	None	None	None	None	None	None	None	None	None	None	None
177.m02862	CNAG_07752	None	None	None	None	None	None	None	None	None	None	UDP-galactopyranose mutase	None	None	None	None	None	None	None	None	None	None	None	None	None	None	None	None	None	None	None	None	None	None	None	None	None	None	None	None	None	None	None	None	None	None	None	None	None
177.m02985	CNAG_03452	YEL052W	AFG1	SPBC115.02c	None	orf19.2891	ca3775	AFG1	KOG2383	R	Predicted ATPase	AFG1 family mitochondrial ATPase	Conserved protein that may act as a chaperone in the degradation of misfolded or unassembled cytochrome c oxidase subunits; localized to matrix face of the mitochondrial inner membrane; member of the AAA family but lacks a protease domain	AFG1 family mitochondrial ATPase	ATPase family gene (by homology)	None	None	None	None	None	None	None	None	None	None	None	None	None	None	None	None	None	None	None	None	None	None	None	None	None	None	None	None	None	None	None	None	None	None
177.m03382	CNAG_03465	None	None	None	None	None	None	None	KOG1263	Q	Multicopper oxidases	laccase	None	None	None	None	None	None	None	None	None	None	None	None	None	None	None	None	None	None	None	None	None	None	None	None	None	None	None	None	None	None	None	None	None	None	None	None	None
179.m00098	CNAG_01588	YDR276C	PMP3	SPBC713.11c	pmp3	orf19.2959.1	ca4174	IPF4430	KOG1773	R	Stress responsive protein	hypothetical protein	Small plasma membrane protein related to a family of plant polypeptides that are overexpressed under high salt concentration or low temperature, not essential for viability, deletion causes hyperpolarization of the plasma membrane potential	plasma membrane proteolipid Pmp3	unknown function	None	None	None	None	None	None	None	None	Spo_OS-up_2.0	None	Spo_XS-up_2.0	None	None	None	None	None	None	None	None	None	None	None	None	None	Cal_OS-up_1.5	None	None	None	None	None	None	None	None	None
179.m00123	CNAG_01621	None	None	None	None	None	None	None	None	None	None	conserved hypothetical protein	None	None	None	None	None	None	None	None	None	None	None	None	None	None	None	None	None	None	None	None	None	None	None	None	None	None	None	None	None	None	None	None	None	None	None	None	None
179.m00343	CNAG_02775	None	None	None	None	None	None	None	None	None	None	conserved hypothetical protein	None	None	None	None	None	None	None	None	None	None	None	None	None	None	None	None	None	None	None	None	None	None	None	None	None	None	None	None	None	None	None	None	None	None	None	None	None
180.m00003	CNAG_05979	None	None	None	None	None	None	None	KOG0069	C	Glyoxylate/hydroxypyruvate reductase (D-isomer-specific 2-hydroxy acid dehydrogenase superfamily)	phosphoglycerate dehydrogenase	None	None	None	None	None	None	None	None	None	None	None	None	None	None	None	None	None	None	None	None	None	None	None	None	None	None	None	None	None	None	None	None	None	None	None	None	None
180.m00083	CNAG_05805	None	None	None	None	None	None	None	KOG4466	DK	Component of histone deacetylase complex (breast carcinoma metastasis suppressor 1 protein in human)	conserved hypothetical protein	None	None	None	None	None	None	None	None	None	None	None	None	None	None	None	None	None	None	None	None	None	None	None	None	None	None	None	None	None	None	None	None	None	None	None	None	None
180.m00314	CNAG_05833	None	None	None	None	None	None	None	KOG2533	G	Permease of the major facilitator superfamily	allantoate transporter	None	None	None	None	None	None	None	None	None	None	None	None	None	None	None	None	None	None	None	None	None	None	None	None	None	None	None	None	None	None	None	None	None	None	None	None	None
181.m07996	CNAG_00243	None	None	None	None	None	None	None	None	None	None	conserved hypothetical protein	None	None	None	None	None	None	None	None	None	None	None	None	None	None	None	None	None	None	None	None	None	None	None	None	None	None	None	None	None	None	None	None	None	None	None	None	None
181.m08003	CNAG_00253	YGL233W	SEC15	SPCC1183.01	sec15	orf19.1418	ca3959	IPF11236.3f	KOG2176	U	Exocyst complex, subunit SEC15	rsec15	Essential 113kDa subunit of the exocyst complex (Sec3p, Sec5p, Sec6p, Sec8p, Sec10p, Sec15p, Exo70p, and Exo84p), which mediates polarized targeting of vesicles to active sites of exocytosis; Sec15p associates with Sec4p and vesicles	exocyst complex subunit Sec15 (predicted)	similar to Saccharomyces cerevisiae Sec15p component of the exocyst complex, 3-prime end (by homology)	None	None	None	None	None	None	None	None	None	Spo_OS-dw_2.0	None	None	None	None	None	None	None	None	None	None	None	None	None	None	None	None	None	None	None	None	None	None	None	None
181.m08064	CNAG_00320	YBL084C	CDC27	SPAC17C9.01c	nuc2	orf19.3231	ca5429	CDC27	KOG1126	D	DNA-binding cell division cycle control protein	ubiquitin-protein ligase	Subunit of the Anaphase-Promoting Complex/Cyclosome (APC/C), which is a ubiquitin-protein ligase required for degradation of anaphase inhibitors, including mitotic cyclins, during the metaphase/anaphase transition	anaphase-promoting complex subunit Apc3	subunit of anaphase-promoting complex (by homology)	Sce_OS-up_2.0	None	None	None	Sce_HS-up_2.0	None	None	None	None	None	None	None	None	None	None	None	None	None	None	None	None	None	None	None	None	None	None	None	None	None	None	None	None	None
181.m08348	CNAG_00619	None	None	None	None	None	None	None	KOG2512	O	Beta-tubulin folding cofactor C	tubulin folding cofactor C	None	None	None	None	None	None	None	None	None	None	None	None	None	None	None	None	None	None	None	None	None	None	None	None	None	None	None	None	None	None	None	None	None	None	None	None	None
181.m08762	CNAG_00387	None	None	None	None	None	None	None	KOG4567	R	GTPase-activating protein	conserved hypothetical protein	None	None	None	None	None	None	None	None	None	None	None	None	None	None	None	None	None	None	None	None	None	None	None	None	None	None	None	None	None	None	None	None	None	None	None	None	None
181.m08770	CNAG_00452	None	None	None	None	None	None	None	KOG0141	EI	Isovaleryl-CoA dehydrogenase	isovaleryl-CoA dehydrogenase 2	None	None	None	None	None	None	None	None	None	None	None	None	None	None	None	None	None	None	None	None	None	None	None	None	None	None	None	None	None	None	None	None	None	None	None	None	None
183.m01589	CNAG_07925	None	None	None	None	None	None	None	KOG4674	S	Uncharacterized conserved coiled-coil protein	conserved hypothetical protein	None	None	None	None	None	None	None	None	None	None	None	None	None	None	None	None	None	None	None	None	None	None	None	None	None	None	None	None	None	None	None	None	None	None	None	None	None
184.m04328	None	None	None	None	None	None	None	None	None	None	None	None	None	None	None	None	None	None	None	None	None	None	None	None	None	None	None	None	None	None	None	None	None	None	None	None	None	None	None	None	None	None	None	None	None	None	None	None	None
184.m04376	CNAG_05386	YDR300C	PRO1	SPAC17H9.13c	None	orf19.7638	ca6031	PRO1	KOG1154	E	Gamma-glutamyl kinase	glutamate 5-kinase	Gamma-glutamyl kinase, catalyzes the first step in proline biosynthesis	glutamate 5-kinase (predicted)	glutamate 5-kinase (by homology)	None	None	None	Sce_XS-dw_2.0	None	Sce_HS-dw_2.0	None	None	None	None	None	None	None	None	None	None	None	None	None	None	None	None	None	None	None	None	None	None	Cal_XS-up_1.5	None	None	None	None	None
184.m04432	CNAG_00306	None	None	None	None	None	None	None	KOG1836	W	Extracellular matrix glycoprotein Laminin subunits alpha and gamma	conserved hypothetical protein	None	None	None	None	None	None	None	None	None	None	None	None	None	None	None	None	None	None	None	None	None	None	None	None	None	None	None	None	None	None	None	None	None	None	None	None	None
184.m04442	CNAG_05462	YKL150W	MCR1	None	None	orf19.3507	ca2457	MCR1	KOG0534	HC	NADH-cytochrome b-5 reductase	cytochrome-b5 reductase	Mitochondrial NADH-cytochrome b5 reductase, involved in ergosterol biosynthesis	None	NADH-cytochrome-b5 reductase (by homology)	Sce_OS-up_2.0	None	Sce_XS-up_2.0	None	Sce_HS-up_2.0	None	Sce_CSR-up_2.0	None	None	None	None	None	None	None	None	None	None	None	None	None	None	None	None	None	Cal_OS-up_1.5	None	Cal_OS-up_2.0	None	None	None	None	None	None	None
184.m04637	None	None	None	None	None	None	None	None	None	None	None	None	None	None	None	None	None	None	None	None	None	None	None	None	None	None	None	None	None	None	None	None	None	None	None	None	None	None	None	None	None	None	None	None	None	None	None	None	None
184.m04638	None	None	None	None	None	None	None	None	None	None	None	None	None	None	None	None	None	None	None	None	None	None	None	None	None	None	None	None	None	None	None	None	None	None	None	None	None	None	None	None	None	None	None	None	None	None	None	None	None
184.m04710	CNAG_05253	None	None	None	None	None	None	None	None	None	None	conserved hypothetical protein	None	None	None	None	None	None	None	None	None	None	None	None	None	None	None	None	None	None	None	None	None	None	None	None	None	None	None	None	None	None	None	None	None	None	None	None	None
184.m04801	CNAG_05145	None	None	None	None	None	None	None	KOG1802	A	RNA helicase nonsense mRNA reducing factor (pNORF1)	DNA helicase	None	None	None	None	None	None	None	None	None	None	None	None	None	None	None	None	None	None	None	None	None	None	None	None	None	None	None	None	None	None	None	None	None	None	None	None	None
185.m02362	CNAG_07860	None	None	None	None	None	None	None	KOG0883	O	Cyclophilin type, U box-containing peptidyl-prolyl cis-trans isomerase	peptidyl-prolyl cis-trans isomerase-like 2	None	None	None	None	None	None	None	None	None	None	None	None	None	None	None	None	None	None	None	None	None	None	None	None	None	None	None	None	None	None	None	None	None	None	None	None	None
185.m02477	CNAG_04699	None	None	SPAC1782.03	None	None	None	None	KOG1425	Z	Microfibrillar-associated protein MFAP1	conserved hypothetical protein	None	microfibrillar-associated protein family protein	None	None	None	None	None	None	None	None	None	None	None	None	None	None	None	None	None	None	None	None	None	None	None	None	None	None	None	None	None	None	None	None	None	None	None
185.m02669	CNAG_04892	None	None	None	None	None	None	None	None	None	None	conserved hypothetical protein	None	None	None	None	None	None	None	None	None	None	None	None	None	None	None	None	None	None	None	None	None	None	None	None	None	None	None	None	None	None	None	None	None	None	None	None	None
186.m03790	CNAG_03857	None	None	None	None	None	None	None	KOG1075	R	FOG: Reverse transcriptase	hypothetical protein	None	None	None	None	None	None	None	None	None	None	None	None	None	None	None	None	None	None	None	None	None	None	None	None	None	None	None	None	None	None	None	None	None	None	None	None	None
186.m04036	CNAG_03667	None	None	None	None	None	None	None	KOG3819	S	Uncharacterized conserved proteins (Hepatitis delta antigen-interacting protein A)	conserved hypothetical protein	None	None	None	None	None	None	None	None	None	None	None	None	None	None	None	None	None	None	None	None	None	None	None	None	None	None	None	None	None	None	None	None	None	None	None	None	None
[truncated: 16 more columns]
