# Supplementary material for: Comparative Transcriptome Analysis of the CO2 Sensing Pathway Via Differential Expression of Carbonic Anhydrase in Cryptococcus neoformans
Source: Oxford University Press journal article supplement (doi:10.1534/genetics.110.118315), 2010-06-03
Supplement: tables5.xls [file tables5.xls]

## Sheet: H99 CAN2 BCS
Table S5. List of Can2-dependent genes in C. neoformans
Gene ID/ name									Biological function							Stress Response Genes of S. cerevisiae								Stress Response Genes of S. pombe								Stress Response Genes of C. albicans (Enjalbert et al., 2003)								Stress Response Genes of C. albicans (Enjalbert et al., 2006)
C.neo (JEC21) ID	C.neo (H99) ID	Sce ID	Sce_Gene (SGD)	Spo ID	Spo_Gene (GeneDB)	Cal ID (SGTC)	Cal ID (CYGD)	Cal_Gene (CandiaDB)	KOGs ID	KOGs Catagory	KOGs Description	Cn.H99.v2 Description	Sce_Description (SGD)	Spo_Description (GeneDB)	Cal_Description (CandiaDB)	Sce_OS-up_2.0 (Gasch-00)	Sce_OS-dw_2.0 (Gasch-00)	Sce_XS-up_2.0 (Gasch-00)	Sce_XS-dw_2.0 (Gasch-00)	Sce_HS-up_2.0 (Gasch-00)	Sce_HS-dw_2.0 (Gasch-00)	Sce_SSR-up_2.0 (Gasch-00, Re-exam)	Sce_SSR-dw_2.0 (Gasch-00, Re-exam)	Spo_OS-up_2.0 (Chen-03)	Spo_OS-dw_2.0 (Chen-03)	Spo_XS-up_2.0 (Chen-03)	Spo_XS-dw_2.0 (Chen-03)	Spo_Cd-up_2.0 (Chen-03)	Spo_Cd-dw_2.0 (Chen-03)	Spo_SSR-up_2.0 (Chen-03)	Spo_SSR-dw_2.0 (Chen-03)	Cal_OS-up (Enjalbert-03)	Cal_OS-dw (Enjalbert-03)	Cal_XS-up (Enjalbert-03)	Cal_XS-dw (Enjalbert-03)	Cal_HS-up (Enjalbert-03)	Cal_HS-dw (Enjalbert-03)	Cal_SSR-up (Enjalbert-03)	Cal_SSR-dw (Enjalbert-03)	Cal_OS-up_1.5 (Enjalbert-06)	Cal_OS-dw_1.5 (Enjalbert-06)	Cal_OS-up_2.0 (Enjalbert-06)	Cal_OS-dw_2.0 (Enjalbert-06)	Cal_XS-up_1.5 (Enjalbert-06)	Cal_XS-dw_1.5 (Enjalbert-06)	Cal_XS-up_2.0 (Enjalbert-06)	Cal_XS-dw_2.0 (Enjalbert-06)	Cal_Cd-up_1.5 (Enjalbert-06)	Cal_Cd-dw_1.5 (Enjalbert-06)
162.m02116	CNAG_04106	None	None	None	None	None	None	None	KOG0499	PT	Cyclic nucleotide-gated cation channel CNCG4	conserved hypothetical protein	None	None	None	None	None	None	None	None	None	None	None	None	None	None	None	None	None	None	None	None	None	None	None	None	None	None	None	None	None	None	None	None	None	None	None	None	None
162.m02222	CNAG_04193	None	None	None	None	None	None	None	None	None	None	conserved hypothetical protein	None	None	None	None	None	None	None	None	None	None	None	None	None	None	None	None	None	None	None	None	None	None	None	None	None	None	None	None	None	None	None	None	None	None	None	None	None
162.m02517	CNAG_07772	None	None	None	None	None	None	None	KOG3525	O	Subtilisin-like proprotein convertase	conserved hypothetical protein	None	None	None	None	None	None	None	None	None	None	None	None	None	None	None	None	None	None	None	None	None	None	None	None	None	None	None	None	None	None	None	None	None	None	None	None	None
162.m02596	None	None	None	None	None	None	None	None	None	None	None	None	None	None	None	None	None	None	None	None	None	None	None	None	None	None	None	None	None	None	None	None	None	None	None	None	None	None	None	None	None	None	None	None	None	None	None	None	None
162.m02604	None	None	None	None	None	None	None	None	None	None	None	None	None	None	None	None	None	None	None	None	None	None	None	None	None	None	None	None	None	None	None	None	None	None	None	None	None	None	None	None	None	None	None	None	None	None	None	None	None
162.m02617	CNAG_04539	YGR112W	SHY1	SPBC1215.01	shy1	orf19.4841	ca4742	SHY1	KOG1563	C	Mitochondrial protein Surfeit 1/SURF1/SHY1, required for expression of cytochrome oxidase	mitochondrial protein required for respiration	Mitochondrial inner membrane protein required for assembly of cytochrome c oxidase (complex IV); associates with complex IV assembly intermediates and complex III/complex IV supercomplexes; similar to human SURF1 involved in Leigh Syndrome	SURF-family protein Shy1	SURF homologue protein (by homology)	None	None	None	None	Sce_HS-up_2.0	None	None	None	None	None	None	None	None	None	None	None	None	None	None	None	None	None	None	None	None	None	None	None	None	None	None	None	None	None
162.m02620	CNAG_07780	YPL069C	BTS1	None	None	orf19.6674	ca4277	BTS1	None	None	None	farnesyltranstransferase	Geranylgeranyl diphosphate synthase, increases the intracellular pool of geranylgeranyl diphosphate, suppressor of bet2 mutation that causes defective geranylgeranylation of small GTP-binding proteins that mediate vesicular traffic	None	Geranylgeranyl diphosphate synthase (by homology)	None	None	None	None	None	None	None	None	None	None	None	None	None	None	None	None	None	Cal_OS-dw	None	None	None	Cal_HS-dw	None	None	None	None	None	None	None	None	None	None	None	None
162.m02627	CNAG_04505	YER020W	GPA2	SPAC23H3.13c	gpa2	orf19.1621	ca4012	GPA2	KOG0082	DT	G-protein alpha subunit (small G protein superfamily)	guanine nucleotide-binding protein subunit alpha	Nucleotide binding alpha subunit of the heterotrimeric G protein that interacts with the receptor Gpr1p, has signaling role in response to nutrients; green fluorescent protein (GFP)-fusion protein localizes to the cell periphery	heterotrimeric G protein alpha-2 subunit Gpa2	nucleotide-binding regulatory protein GPA2	Sce_OS-up_2.0	None	Sce_XS-up_2.0	None	Sce_HS-up_2.0	None	Sce_CSR-up_2.0	None	None	None	None	None	None	None	None	None	None	None	None	None	None	None	None	None	None	None	None	None	None	None	None	None	None	None
162.m02637	CNAG_04485	YOR317W	FAA1	SPBP4H10.11c	lcf2	orf19.7592	ca5992	FAA4	KOG1180	I	Acyl-CoA synthetase	long-chain-fatty-acid-CoA-ligase	Long chain fatty acyl-CoA synthetase with a preference for C12:0-C16:0 fatty acids; involved in the activation of imported fatty acids; localized to both lipid particles and mitochondrial outer membrane; essential for stationary phase	long-chain-fatty-acid-CoA ligase	long-chain fatty acid--CoA ligase and synthetase 4 (by homology)	Sce_OS-up_2.0	None	None	None	Sce_HS-up_2.0	None	None	None	None	None	None	None	None	None	None	None	None	None	None	None	None	None	None	None	None	None	None	None	None	Cal_XS-dw_1.5	None	None	None	None
162.m02648	CNAG_04474	None	None	None	None	None	None	None	None	None	None	monocarboxylic acid transporter	None	None	None	None	None	None	None	None	None	None	None	None	None	None	None	None	None	None	None	None	None	None	None	None	None	None	None	None	None	None	None	None	None	None	None	None	None
162.m02661	CNAG_04450	YER164W	CHD1	SPAC3G6.01	hrp3	orf19.3035	ca5064	CHD1	KOG0384	K	Chromodomain-helicase DNA-binding protein	transcription regulator	Nucleosome remodeling factor that functions in regulation of transcription elongation; contains a chromo domain, a helicase domain and a DNA-binding domain; component of both the SAGA and SLIK complexes	ATP-dependent DNA helicase Hrp3	transcriptional regulator (by homology)	None	None	None	None	None	None	None	None	None	None	None	None	None	None	None	None	None	None	None	None	None	None	None	None	None	None	None	None	None	None	None	None	None	None
162.m02670	CNAG_04440	YOR143C	THI80	SPAC6F12.05c	tnr3	orf19.1110	ca1462	THI80	KOG3153	H	Thiamine pyrophosphokinase	thiamine pyrophosphokinase	Thiamine pyrophosphokinase, phosphorylates thiamine to produce the coenzyme thiamine pyrophosphate (thiamine diphosphate)	thiamine diphosphokinase Tnr3	Thiamin pyrophosphokinase (by homology)	None	None	None	None	None	Sce_HS-dw_2.0	None	None	None	None	None	None	None	None	None	None	None	None	None	None	None	None	None	None	None	None	None	None	None	None	None	None	None	None
162.m02671	CNAG_04445	YNL096C	RPS7B	SPAC18G6.14c	rps7	orf19.1700	ca1502	RPS7A	KOG3320	J	40S ribosomal protein S7	40S ribosomal protein S7	Protein component of the small (40S) ribosomal subunit, nearly identical to Rps7Ap; interacts with Kti11p; deletion causes hypersensitivity to zymocin; has similarity to rat S7 and Xenopus S8 ribosomal proteins	40S ribosomal protein S7 (predicted)	ribosomal protein (by homology)	None	Sce_OS-dw_2.0	None	Sce_XS-dw_2.0	None	Sce_HS-dw_2.0	None	Sce_CSR-dw_2.0	None	None	None	Spo_XS-dw_2.0	None	None	None	None	None	None	None	None	None	None	None	None	None	None	None	None	None	Cal_XS-dw_1.5	None	Cal_XS-dw_2.0	None	None
162.m02676	CNAG_04459	None	None	None	None	None	None	None	None	None	None	hypothetical protein	None	None	None	None	None	None	None	None	None	None	None	None	None	None	None	None	None	None	None	None	None	None	None	None	None	None	None	None	None	None	None	None	None	None	None	None	None
162.m02683	CNAG_04472	None	None	None	None	None	None	None	KOG3098	S	Uncharacterized conserved protein	membrane protein	None	None	None	None	None	None	None	None	None	None	None	None	None	None	None	None	None	None	None	None	None	None	None	None	None	None	None	None	None	None	None	None	None	None	None	None	None
162.m02687	CNAG_07769	YDR457W	TOM1	SPAC19D5.04	ptr1	orf19.5776	ca2803	IPF11711	KOG0939	OK	E3 ubiquitin-protein ligase/Putative upstream regulatory element binding protein	E3 ubiquitin-protein ligase	E3 ubiquitin ligase of the hect-domain class; has a role in mRNA export from the nucleus and may regulate transcriptional coactivators	HECT domain	ubiquitin-protein ligase (by homology)	None	None	None	Sce_XS-dw_2.0	None	None	None	None	None	None	None	None	None	None	None	None	None	None	None	None	None	None	None	None	None	None	None	None	None	None	None	None	None	None
162.m02699	CNAG_04414	YBR293W	VBA2	SPBC12C2.13c	fnx1	None	None	None	KOG0254	R	Predicted transporter (major facilitator superfamily)	multidrug resistance protein fnx1	Permease of basic amino acids in the vacuolar membrane	MFS multidrug efflux transporter	None	None	None	None	None	None	None	None	None	None	None	None	None	None	None	None	None	None	None	None	None	None	None	None	None	None	None	None	None	None	None	None	None	None	None
162.m02712	CNAG_04393	None	None	None	None	None	None	None	KOG0952	A	DNA/RNA helicase MER3/SLH1, DEAD-box superfamily	RNA helicase	None	None	None	None	None	None	None	None	None	None	None	None	None	None	None	None	None	None	None	None	None	None	None	None	None	None	None	None	None	None	None	None	None	None	None	None	None
162.m02733	CNAG_04396	YCL012C	None	SPAC1687.07	None	orf19.7078	ca5620	IPF511	None	None	None	Aycl012	None	conserved fungal protein	unknown function	None	None	None	None	None	None	None	None	None	None	Spo_XS-up_2.0	None	None	None	None	None	None	None	None	None	None	None	None	None	None	None	None	None	None	None	None	None	None	None
162.m02741	CNAG_04365	YDR060W	MAK21	SPAC4F10.09c	None	orf19.5912	ca6134	MAK21	KOG2038	JK	CAATT-binding transcription factor/60S ribosomal subunit biogenesis protein	ribosome biogenesis protein	Constituent of 66S pre-ribosomal particles, required for large (60S) ribosomal subunit biogenesis; involved in nuclear export of pre-ribosomes; required for maintenance of dsRNA virus; homolog of human CAATT-binding protein	ribosome biogenesis protein Noc1 (predicted)	Ribosome biogenesis protein (by homology)	None	None	None	Sce_XS-dw_2.0	None	Sce_HS-dw_2.0	None	None	None	None	None	None	None	None	None	None	None	None	None	Cal_XS-dw	None	Cal_HS-dw	None	None	None	None	None	None	None	None	None	None	None	None
162.m02761	CNAG_04347	YER052C	HOM3	SPBC19F5.04	None	orf19.1235	ca2977	HOM3	KOG0456	E	Aspartate kinase	aspartate kinase	Aspartate kinase (L-aspartate 4-P-transferase); cytoplasmic enzyme that catalyzes the first step in the common pathway for methionine and threonine biosynthesis; expression regulated by Gcn4p and the general control of amino acid synthesis	aspartate kinase (predicted)	Aspartokinase (by homology)	None	None	Sce_XS-up_2.0	None	None	Sce_HS-dw_2.0	None	None	None	None	None	None	None	None	None	None	None	None	None	None	None	None	None	None	None	None	None	None	Cal_XS-up_1.5	None	Cal_XS-up_2.0	None	None	None
162.m02767	CNAG_04362	YOR046C	DBP5	SPBC12C2.06	None	orf19.1661	ca3464	DBP5	KOG0332	A	ATP-dependent RNA helicase	ATP-dependent RNA helicase DBP5	Cytoplasmic ATP-dependent RNA helicase of the DEAD-box family involved in mRNA export from the nucleus; involved in translation termination	ATP-dependent RNA helicase Dbp5	RNA helicase (by homology)	None	None	None	None	None	None	None	None	None	None	None	None	None	None	None	None	None	None	None	None	None	None	None	None	None	None	None	None	None	None	None	None	None	None
162.m02770	CNAG_04368	None	None	None	None	None	None	None	KOG2950	R	Uncharacterized protein involved in protein-protein interaction, contains polyproline-binding GYF domain	conserved hypothetical protein	None	None	None	None	None	None	None	None	None	None	None	None	None	None	None	None	None	None	None	None	None	None	None	None	None	None	None	None	None	None	None	None	None	None	None	None	None
162.m02783	CNAG_04307	None	None	SPCC1223.09	None	orf19.2114	ca2731	URIC	KOG1599	Q	Uricase (urate oxidase)	uricase	None	uricase (predicted)	uricase (urate oxidase) (by homology)	None	None	None	None	None	None	None	None	None	None	Spo_XS-up_2.0	None	None	None	None	None	None	None	None	None	None	None	None	None	Cal_OS-up_1.5	None	None	None	None	None	None	None	None	None
162.m02797	CNAG_04308	None	None	None	None	None	None	None	KOG2304	I	3-hydroxyacyl-CoA dehydrogenase	short chain 3-hydroxyacyl-CoA dehydrogenase	None	None	None	None	None	None	None	None	None	None	None	None	None	None	None	None	None	None	None	None	None	None	None	None	None	None	None	None	None	None	None	None	None	None	None	None	None
162.m02799	CNAG_04313	YHR179W	OYE2	SPAC5H10.10	None	orf19.3442	ca4021	EBP2	KOG0134	CR	NADH:flavin oxidoreductase/12-oxophytodienoate reductase	NADPH dehydrogenase 2	Widely conserved NADPH oxidoreductase containing flavin mononucleotide (FMN), homologous to Oye3p with slight differences in ligand binding and catalytic properties; may be involved in sterol metabolism	NADPH dehydrogenase (predicted)	NADPH dehydrogenase (by homology)	None	None	Sce_XS-up_2.0	None	None	Sce_HS-dw_2.0	None	None	None	None	None	None	None	None	None	None	None	None	None	None	None	None	None	None	None	None	None	None	Cal_XS-up_1.5	None	Cal_XS-up_2.0	None	None	None
162.m02814	CNAG_04141	None	None	None	None	None	None	None	KOG2275	E	Aminoacylase ACY1 and related metalloexopeptidases	vacuolar protein	None	None	None	None	None	None	None	None	None	None	None	None	None	None	None	None	None	None	None	None	None	None	None	None	None	None	None	None	None	None	None	None	None	None	None	None	None
162.m02851	CNAG_04187	YJL091C	GWT1	SPAC144.10c	gwt1	orf19.6884	ca4573	IPF9431	KOG0411	S	Uncharacterized membrane protein	GPI-anchored wall transfer protein 1	Protein involved in the inositol acylation of glucosaminyl phosphatidylinositol (GlcN-PI) to form glucosaminyl(acyl)phosphatidylinositol (GlcN(acyl)PI), an intermediate in the biosynthesis of glycosylphosphatidylinositol (GPI) anchors	pig-W	unknown function	None	None	None	None	None	None	None	None	None	None	None	None	None	None	None	None	None	None	None	None	None	None	None	None	None	None	None	None	None	None	None	None	None	None
162.m02864	CNAG_04176	None	None	None	None	None	None	None	KOG0627	K	Heat shock transcription factor	conserved hypothetical protein	None	None	None	None	None	None	None	None	None	None	None	None	None	None	None	None	None	None	None	None	None	None	None	None	None	None	None	None	None	None	None	None	None	None	None	None	None
162.m02871	CNAG_04194	YLR208W	SEC13	SPBC215.15	sec13	orf19.316	ca3392	SEC13	KOG1332	U	Vesicle coat complex COPII, subunit SEC13	protein transport protein SEC13	Component of both the Nup84 nuclear pore sub-complex and of the COPII complex (Sar1p, Sec13p, Sec16p, Sec23p, Sec24p, Sec31p, Sfb2p, and Sfb3p) which is important for the formation of ER to Golgi transport vesicles	COPII-coated vesicle component Sec13	Protein transport protein	None	None	None	None	None	None	None	None	None	None	None	None	None	None	None	None	None	None	None	None	None	None	None	None	None	None	None	None	None	None	None	None	None	None
162.m02883	CNAG_04210	None	None	None	None	None	None	None	KOG0254	R	Predicted transporter (major facilitator superfamily)	sugar transporter	None	None	None	None	None	None	None	None	None	None	None	None	None	None	None	None	None	None	None	None	None	None	None	None	None	None	None	None	None	None	None	None	None	None	None	None	None
162.m02913	CNAG_04266	YNL107W	YAF9	SPAC17G8.07	None	orf19.5501	None	None	KOG3149	K	Transcription initiation factor IIF, auxiliary subunit	YEATS family protein	Subunit of both the NuA4 histone H4 acetyltransferase complex and the SWR1 complex, may function to antagonize silencing near telomeres; interacts directly with Swc4p, has homology to human leukemogenic protein AF9, contains a YEATS domain	YEATS family histone acetyltransferase subunit (predicted)	None	None	None	None	None	None	None	None	None	None	None	None	None	None	None	None	None	None	None	None	None	None	None	None	None	None	None	None	None	None	None	None	None	None	None
162.m02919	CNAG_04120	YMR277W	FCP1	SPAC19B12.05c	fcp1	orf19.6742	ca5952	IPF3503	KOG0323	K	TFIIF-interacting CTD phosphatases, including NLI-interacting factor	conserved hypothetical protein	Carboxy-terminal domain (CTD) phosphatase, essential for dephosphorylation of the repeated C-terminal domain of the RNA polymerase II large subunit (Rpo21p)	CTD phosphatase Fcp1	similar to Saccharomyces cerevisiae Fcp1p TFIIF interacting component of CTD phosphatase (by homology)	None	Sce_OS-dw_2.0	None	Sce_XS-dw_2.0	None	None	None	None	None	None	None	None	None	None	None	None	None	None	None	None	None	None	None	None	None	None	None	None	None	None	None	None	None	None
162.m02929	CNAG_04111	None	None	SPCC126.08c	None	orf19.2200	ca2436	IPF5500	KOG3839	U	Lectin VIP36, involved in the transport of glycoproteins carrying high mannose-type glycans	lectin	None	lectin (predicted)	unknown function	None	None	None	None	None	None	None	None	None	None	None	None	None	None	None	None	None	None	None	None	None	None	None	None	None	None	None	None	None	None	None	None	None	None
162.m02936	CNAG_04278	YDL164C	CDC9	SPAC20G8.01	cdc17	orf19.6155	ca3145	CDC9	KOG0967	L	ATP-dependent DNA ligase I	DNA ligase	DNA ligase found in the nucleus and mitochondria, an essential enzyme that joins Okazaki fragments during DNA replication; also acts in nucleotide excision repair, base excision repair, and recombination	ATP-dependent DNA ligase Cdc17	DNA ligase (by homology)	None	None	None	None	None	None	None	None	None	None	None	None	None	None	None	None	None	None	None	None	None	None	None	None	None	None	None	None	None	None	None	None	None	None
162.m02939	CNAG_04272	None	None	SPACUNK12.02c	cmk1	None	None	None	KOG0032	T	Ca2+/calmodulin-dependent protein kinase, EF-Hand protein superfamily	CAMK/CAMK1 protein kinase	None	calcium/calmodulin-dependent protein kinase Cmk1	None	None	None	None	None	None	None	None	None	None	None	None	None	None	None	None	None	None	None	None	None	None	None	None	None	None	None	None	None	None	None	None	None	None	None
162.m02962	CNAG_04515	None	None	None	None	None	None	None	KOG2491	Y	Nuclear matrix protein	conserved hypothetical protein	None	None	None	None	None	None	None	None	None	None	None	None	None	None	None	None	None	None	None	None	None	None	None	None	None	None	None	None	None	None	None	None	None	None	None	None	None
162.m02978	CNAG_04438	None	None	SPAC1687.04	None	None	None	None	KOG2545	S	Conserved membrane protein	prov protein	None	conserved eukaryotic protein	None	None	None	None	None	None	None	None	None	None	None	None	None	None	None	None	None	None	None	None	None	None	None	None	None	None	None	None	None	None	None	None	None	None	None
162.m02995	CNAG_04394	None	None	None	None	None	None	None	None	None	None	conserved hypothetical protein	None	None	None	None	None	None	None	None	None	None	None	None	None	None	None	None	None	None	None	None	None	None	None	None	None	None	None	None	None	None	None	None	None	None	None	None	None
162.m03011	CNAG_04362	YOR046C	DBP5	SPBC12C2.06	None	orf19.1661	ca3464	DBP5	KOG0332	A	ATP-dependent RNA helicase	ATP-dependent RNA helicase DBP5	Cytoplasmic ATP-dependent RNA helicase of the DEAD-box family involved in mRNA export from the nucleus; involved in translation termination	ATP-dependent RNA helicase Dbp5	RNA helicase (by homology)	None	None	None	None	None	None	None	None	None	None	None	None	None	None	None	None	None	None	None	None	None	None	None	None	None	None	None	None	None	None	None	None	None	None
162.m03019	CNAG_04324	None	None	None	None	None	None	None	None	None	None	Atg22B-1p	None	None	None	None	None	None	None	None	None	None	None	None	None	None	None	None	None	None	None	None	None	None	None	None	None	None	None	None	None	None	None	None	None	None	None	None	None
162.m04565	CNAG_04235	YPR100W	MRPL51	SPBC19C2.12	mrpl51	None	None	None	KOG3445	J	Mitochondrial/chloroplast ribosomal protein 36a	conserved hypothetical protein	Mitochondrial ribosomal protein of the large subunit	mitochondrial ribosomal protein subunit L51	None	None	None	None	None	None	None	None	None	None	None	None	None	None	None	None	None	None	None	None	None	None	None	None	None	None	None	None	None	None	None	None	None	None	None
162.m04575	CNAG_04112	None	None	None	None	None	None	None	KOG1577	R	Aldo/keto reductase family proteins	oxidoreductase	None	None	None	None	None	None	None	None	None	None	None	None	None	None	None	None	None	None	None	None	None	None	None	None	None	None	None	None	None	None	None	None	None	None	None	None	None
163.m02758	CNAG_01136	None	None	SPBC16A3.04	rsm25	None	None	None	None	None	None	conserved hypothetical protein	None	mitochondrial ribosomal protein subunit Rsm25	None	None	None	None	None	None	None	None	None	None	None	None	None	None	None	None	None	None	None	None	None	None	None	None	None	None	None	None	None	None	None	None	None	None	None
163.m02820	CNAG_07441	None	None	None	None	None	None	None	KOG1052	PET	Glutamate-gated kainate-type ion channel receptor subunit GluR5 and related subunits	conserved hypothetical protein	None	None	None	None	None	None	None	None	None	None	None	None	None	None	None	None	None	None	None	None	None	None	None	None	None	None	None	None	None	None	None	None	None	None	None	None	None
163.m02841	None	None	None	None	None	None	None	None	None	None	None	None	None	None	None	None	None	None	None	None	None	None	None	None	None	None	None	None	None	None	None	None	None	None	None	None	None	None	None	None	None	None	None	None	None	None	None	None	None
163.m02872	CNAG_01024	None	None	SPAC2F3.02	None	None	None	None	None	None	None	conserved hypothetical protein	None	ER protein translocation subcomplex subunit Sec72 (predicted)	None	None	None	None	None	None	None	None	None	None	None	None	None	None	None	None	None	None	None	None	None	None	None	None	None	None	None	None	None	None	None	None	None	None	None
163.m02928	CNAG_00972	None	None	None	None	None	None	None	KOG3375	R	Phosphoprotein/predicted coiled-coil protein	conserved hypothetical protein	None	None	None	None	None	None	None	None	None	None	None	None	None	None	None	None	None	None	None	None	None	None	None	None	None	None	None	None	None	None	None	None	None	None	None	None	None
163.m03775	CNAG_00874	YBL024W	NCL1	SPAC23C4.17	None	orf19.518	ca4235	NCL1	KOG2198	J	tRNA cytosine-5-methylases and related enzymes of the NOL1/NOP2/sun superfamily	tRNA (cytosine-5-)-methyltransferase	S-adenosyl-L-methionine-dependent tRNA: m5C-methyltransferase, methylates cytosine to m5C at several positions in tRNAs and intron-containing pre-tRNAs; similar to Nop2p and human proliferation associated nucleolar protein p120	tRNA (cytosine-5-)-methyltransferase (predicted)	Probable proliferating-cell nucleolar antigen (by homology)	None	Sce_OS-dw_2.0	None	Sce_XS-dw_2.0	None	Sce_HS-dw_2.0	None	Sce_CSR-dw_2.0	None	None	None	Spo_XS-dw_2.0	None	Spo_Cd-dw_2.0	None	Spo_CESR-dw	None	None	None	Cal_XS-dw	None	None	None	Cal_SSR.XS-dw	None	None	None	None	None	Cal_XS-dw_1.5	None	None	None	None
163.m03785	CNAG_00893	None	None	None	None	None	None	None	None	None	None	conserved hypothetical protein	None	None	None	None	None	None	None	None	None	None	None	None	None	None	None	None	None	None	None	None	None	None	None	None	None	None	None	None	None	None	None	None	None	None	None	None	None
163.m03795	CNAG_00897	None	None	None	None	orf19.7362	ca5660	SKN1.3f	None	None	None	glucosidase	None	None	Glucan synthase subunit, 3-prime end	None	None	None	None	None	None	None	None	None	None	None	None	None	None	None	None	None	None	None	None	None	None	None	None	None	None	None	None	None	None	None	None	None	None
163.m03817	CNAG_00914	None	None	None	None	None	None	None	None	None	None	glucosidase	None	None	None	None	None	None	None	None	None	None	None	None	None	None	None	None	None	None	None	None	None	None	None	None	None	None	None	None	None	None	None	None	None	None	None	None	None
163.m03838	CNAG_00939	None	None	None	None	None	None	None	None	None	None	glucan 1,3-beta-glucosidase	None	None	None	None	None	None	None	None	None	None	None	None	None	None	None	None	None	None	None	None	None	None	None	None	None	None	None	None	None	None	None	None	None	None	None	None	None
163.m03861	CNAG_01018	YER025W	GCD11	SPBC17G9.09	tif213	orf19.4223	ca1322	GCD11	KOG0466	J	Translation initiation factor 2, gamma subunit (eIF-2gamma; GTPase)	eukaryotic translation initiation factor 2 gamma	Gamma subunit of the translation initiation factor eIF2, involved in the identification of the start codon; binds GTP when forming the ternary complex with GTP and tRNAi-Met	translation initiation factor eIF2 gamma subunit	Translation initiation factor eIF2 (by homology)	None	None	None	Sce_XS-dw_2.0	None	Sce_HS-dw_2.0	None	None	None	None	None	None	None	None	None	None	None	None	None	None	None	None	None	None	None	None	None	None	None	None	None	None	None	Cal_Cd-dw_1.5
163.m03884	CNAG_00978	None	None	None	None	orf19.1682	ca0216	IPF11681	KOG2865	C	NADH:ubiquinone oxidoreductase, NDUFA9/39kDa subunit	NADH dehydrogenase	None	None	unknown function	None	None	None	None	None	None	None	None	None	None	None	None	None	None	None	None	None	None	None	Cal_XS-dw	None	None	None	Cal_SSR.XS-dw	None	None	None	None	None	None	None	None	None	None
163.m03915	CNAG_01005	YCL035C	GRX1	SPAC15E1.09	grx2	orf19.6509	ca4964	IPF3920	KOG1752	O	Glutaredoxin and related proteins	glutathione transferase	Hydroperoxide and superoxide-radical responsive heat-stable glutathione-dependent disulfide oxidoreductase with active site cysteine pair; protects cells from oxidative damage	glutaredoxin Grx2	unknown function	Sce_OS-up_2.0	None	Sce_XS-up_2.0	None	Sce_HS-up_2.0	None	Sce_CSR-up_2.0	None	None	None	None	None	None	None	None	None	None	None	None	None	None	None	None	None	None	None	None	None	None	None	None	None	None	None
163.m03920	CNAG_01003	YHR042W	NCP1	SPBC29A10.01	ccr1	orf19.2672	ca3327	NCP1	KOG1158	C	NADP/FAD dependent oxidoreductase	electron transporter	NADP-cytochrome P450 reductase; involved in ergosterol biosynthesis; associated and coordinately regulated with Erg11p	NADPH-cytochrome p450 reductase	NADPH-cytochrome P450 reductase	None	None	None	Sce_XS-dw_2.0	None	Sce_HS-dw_2.0	None	None	None	None	None	None	None	None	None	None	None	None	None	None	None	None	None	None	None	None	None	None	None	None	None	None	None	None
163.m03924	CNAG_00993	YOR125C	CAT5	SPBC337.15c	coq7	orf19.1940	ca3358	IPF19984	KOG4061	R	DMQ mono-oxygenase/Ubiquinone biosynthesis protein COQ7/CLK-1/CAT5	coenzyme q10 biosynthesis protein	Protein required for ubiquinone (Coenzyme Q) biosynthesis; localizes to the matrix face of the mitochondrial inner membrane in a large complex with ubiquinone biosynthetic enzymes; required for gluconeogenic gene activation	ubiquinone biosynthesis protein Coq7	similar to Saccharomyces cerevisiae Cat5p involved in coenzyme Q (ubiquinone) biosynthesis (by homology)	None	None	None	Sce_XS-dw_2.0	Sce_HS-up_2.0	None	None	None	None	None	None	None	None	None	None	None	None	None	None	None	None	None	None	None	None	None	None	None	None	None	None	None	None	None
163.m03927	CNAG_00986	YHR111W	UBA4	SPAC2G11.10c	None	orf19.2324	ca3346	IPF13356	KOG2017	H	Molybdopterin synthase sulfurylase	URM1 activating enzyme	Protein that activates Urm1p before its conjugation to proteins (urmylation); one target is the thioredoxin peroxidase Ahp1p, suggesting a role of urmylation in the oxidative stress response	URM1 activating enzyme (predicted)	molybdopterin biosynthesis (by homology)	None	None	Sce_XS-up_2.0	None	None	None	None	None	None	Spo_OS-dw_2.0	None	None	None	None	None	None	None	Cal_OS-dw	None	None	None	None	None	Cal_SSR.OS-dw	None	Cal_OS-dw_1.5	None	None	Cal_XS-up_1.5	None	Cal_XS-up_2.0	None	None	None
163.m04752	CNAG_00901	None	None	None	None	None	None	None	None	None	None	conserved hypothetical protein	None	None	None	None	None	None	None	None	None	None	None	None	None	None	None	None	None	None	None	None	None	None	None	None	None	None	None	None	None	None	None	None	None	None	None	None	None
163.m04765	CNAG_00906	None	None	SPCC14G10.02	None	None	None	None	KOG1791	S	Uncharacterized conserved protein	nucleolar protein	None	ribosome biogenesis protein Urb1	None	None	None	None	None	None	None	None	None	None	None	None	None	None	None	None	None	None	None	None	None	None	None	None	None	None	None	None	None	None	None	None	None	None	None
163.m04782	CNAG_01006	None	None	None	None	None	None	None	None	None	None	conserved hypothetical protein	None	None	None	None	None	None	None	None	None	None	None	None	None	None	None	None	None	None	None	None	None	None	None	None	None	None	None	None	None	None	None	None	None	None	None	None	None
163.m04809	CNAG_01031	None	None	None	None	None	None	None	KOG1726	V	HVA22/DP1 gene product-related proteins	conserved hypothetical protein	None	None	None	None	None	None	None	None	None	None	None	None	None	None	None	None	None	None	None	None	None	None	None	None	None	None	None	None	None	None	None	None	None	None	None	None	None
163.m06117	CNAG_01099	None	None	SPBC1709.15c	cft2	orf19.325	ca3384	IPF8362	KOG1135	A	mRNA cleavage and polyadenylation factor II complex, subunit CFT2 (CPSF subunit)	cleavage and polyadenylation specificity factor subunit	None	cleavage factor two Cft2/polyadenylation factor CPSF-73 (predicted)	similar to Saccharomyces cerevisiae Cft2p involved in cleavage and polyadenylation specificity factor, part of CF II (by homology)	None	None	None	None	None	None	None	None	None	None	None	None	None	None	None	None	None	None	None	None	None	None	None	None	None	None	None	None	None	Cal_XS-dw_1.5	None	None	None	None
163.m06124	CNAG_01102	None	None	SPAC4H3.08	None	None	None	None	KOG0725	R	Reductases with broad range of substrate specificities	oxidoreductase	None	short chain dehydrogenase (predicted)	None	None	None	None	None	None	None	None	None	Spo_OS-up_2.0	None	Spo_XS-up_2.0	None	Spo_Cd-up_2.0	None	Spo_CESR-up	None	None	None	None	None	None	None	None	None	None	None	None	None	None	None	None	None	None	None
163.m06141	CNAG_01387	None	None	None	None	None	None	None	None	None	None	conserved hypothetical protein	None	None	None	None	None	None	None	None	None	None	None	None	None	None	None	None	None	None	None	None	None	None	None	None	None	None	None	None	None	None	None	None	None	None	None	None	None
163.m06143	CNAG_01384	None	None	None	None	None	None	None	KOG2533	G	Permease of the major facilitator superfamily	bodown198	None	None	None	None	None	None	None	None	None	None	None	None	None	None	None	None	None	None	None	None	None	None	None	None	None	None	None	None	None	None	None	None	None	None	None	None	None
163.m06159	CNAG_01103	YDL043C	PRP11	SPBC21C3.05	sap62	orf19.4724	ca1604	IPF13653	KOG0227	A	Splicing factor 3a, subunit 2	zinc finger protein Sap62	Subunit of the SF3a splicing factor complex, required for spliceosome assembly	zinc finger protein Sap62	unknown function	None	None	None	None	None	None	None	None	None	None	None	None	None	None	None	None	None	Cal_OS-dw	None	None	None	None	None	Cal_SSR.OS-dw	None	None	None	None	None	None	None	None	None	None
163.m06200	CNAG_01155	YHL032C	GUT1	None	None	orf19.558	ca0929	GUT1	KOG2517	G	Ribulose kinase and related carbohydrate kinases	glycerol kinase	Glycerol kinase, converts glycerol to glycerol-3-phosphate; glucose repression of expression is mediated by Adr1p and Ino2p-Ino4p; derepression of expression on non-fermentable carbon sources is mediated by Opi1p and Rsf1p	None	Glycerol kinase (by homology)	None	None	None	None	None	None	None	None	None	None	None	None	None	None	None	None	None	None	None	None	None	None	None	None	None	None	None	None	None	Cal_XS-dw_1.5	None	Cal_XS-dw_2.0	None	None
163.m06204	CNAG_01150	None	None	None	None	orf19.118	ca0482	IPF14763	None	None	None	delta-12 fatty acid desaturase	None	None	delta-12 fatty acid desaturase (by homology)	None	None	None	None	None	None	None	None	None	None	None	None	None	None	None	None	None	None	None	None	None	Cal_HS-dw	None	Cal_SSR.HS-dw	None	Cal_OS-dw_1.5	None	Cal_OS-dw_2.0	None	None	None	None	None	None
163.m06205	CNAG_01147	YKL013C	ARC19	SPAC6G9.07c	arc4	orf19.3251	ca5448	ARC19.3f	KOG1876	Z	Actin-related protein Arp2/3 complex, subunit ARPC4	ARP2/3 complex 20 kDa subunit	Subunit of the ARP2/3 complex, which is required for the motility and integrity of cortical actin patches	ARP2/3 actin-organizing complex subunit Arc4	subunit of the Arp2/3 complex involved in the control of actin polymerization, exon 2 (by homology)	None	None	None	None	None	None	None	None	None	None	None	None	None	None	None	None	None	None	None	None	None	None	None	None	None	None	None	None	None	None	None	None	None	None
163.m06232	None	None	None	None	None	None	None	None	None	None	None	None	None	None	None	None	None	None	None	None	None	None	None	None	None	None	None	None	None	None	None	None	None	None	None	None	None	None	None	None	None	None	None	None	None	None	None	None	None
163.m06236	CNAG_00890	None	None	None	None	None	None	None	None	None	None	conserved hypothetical protein	None	None	None	None	None	None	None	None	None	None	None	None	None	None	None	None	None	None	None	None	None	None	None	None	None	None	None	None	None	None	None	None	None	None	None	None	None
163.m06279	CNAG_01174	YJL108C	PRM10	SPAC7D4.12c	None	orf19.6527	ca4951	IPF13607	None	None	None	DUF1212 family protein	Pheromone-regulated protein, predicted to have 5 transmembrane segments; induced by treatment with 8-methoxypsoralen and UVA irradiation	DUF1212 family protein	unknown function	Sce_OS-up_2.0	None	None	None	Sce_HS-up_2.0	None	None	None	None	None	None	None	None	None	None	None	None	None	None	None	None	None	None	None	Cal_OS-up_1.5	None	Cal_OS-up_2.0	None	Cal_XS-up_1.5	None	Cal_XS-up_2.0	None	None	None
163.m06289	CNAG_01239	None	None	None	None	None	None	None	None	None	None	chitin deacetylase	None	None	None	None	None	None	None	None	None	None	None	None	None	None	None	None	None	None	None	None	None	None	None	None	None	None	None	None	None	None	None	None	None	None	None	None	None
163.m06303	CNAG_01429	None	None	None	None	None	None	None	KOG2389	K	Predicted bromodomain transcription factor	conserved hypothetical protein	None	None	None	None	None	None	None	None	None	None	None	None	None	None	None	None	None	None	None	None	None	None	None	None	None	None	None	None	None	None	None	None	None	None	None	None	None
163.m06304	CNAG_01430	None	None	None	None	None	None	None	None	None	None	conserved hypothetical protein	None	None	None	None	None	None	None	None	None	None	None	None	None	None	None	None	None	None	None	None	None	None	None	None	None	None	None	None	None	None	None	None	None	None	None	None	None
163.m06306	CNAG_07415	None	None	None	None	None	None	None	None	None	None	conserved hypothetical protein	None	None	None	None	None	None	None	None	None	None	None	None	None	None	None	None	None	None	None	None	None	None	None	None	None	None	None	None	None	None	None	None	None	None	None	None	None
163.m06311	CNAG_01438	YLR182W	SWI6	SPBC336.12c	cdc10	None	None	None	None	None	None	transcription factor	Transcription cofactor, forms complexes with DNA-binding proteins Swi4p and Mbp1p to regulate transcription at the G1/S transition; involved in meiotic gene expression; localization regulated by phosphorylation; potential Cdc28p substrate	MBF transcription factor complex subunit Cdc10	None	None	None	None	None	None	None	None	None	None	None	Spo_XS-up_2.0	None	None	None	None	None	None	None	None	None	None	None	None	None	None	None	None	None	None	None	None	None	None	None
163.m06315	CNAG_01437	YCL059C	KRR1	SPBC25B2.05	mis3	orf19.661	ca4096	KRR1	KOG2874	JD	rRNA processing protein	ribosomal RNA assembly protein mis3	Essential nucleolar protein required for the synthesis of 18S rRNA and for the assembly of 40S ribosomal subunit	rRNA processing protein Mis3	involved in cell division and spore germination	None	Sce_OS-dw_2.0	None	Sce_XS-dw_2.0	None	Sce_HS-dw_2.0	None	Sce_CSR-dw_2.0	None	None	None	Spo_XS-dw_2.0	None	Spo_Cd-dw_2.0	None	Spo_CESR-dw	None	Cal_OS-dw	None	Cal_XS-dw	None	Cal_HS-dw	None	Cal_CSR-dw	None	None	None	None	None	None	None	None	None	None
163.m06318	CNAG_01431	None	None	None	None	None	None	None	KOG0490	R	Transcription factor, contains HOX domain	conserved hypothetical protein	None	None	None	None	None	None	None	None	None	None	None	None	None	None	None	None	None	None	None	None	None	None	None	None	None	None	None	None	None	None	None	None	None	None	None	None	None
163.m06324	CNAG_01422	YBR287W	None	SPAC5D6.04	None	orf19.6117	ca0262	IPF20054	KOG2722	S	Predicted membrane protein	endoplasmic reticulum protein	None	auxin family transmembrane transporter (predicted)	None	None	None	None	None	Sce_HS-up_2.0	None	None	None	None	None	Spo_XS-up_2.0	None	None	None	None	None	None	None	None	None	None	None	None	None	None	None	None	None	Cal_XS-up_1.5	None	Cal_XS-up_2.0	None	Cal_Cd-up_1.5	None
163.m06342	CNAG_06809	YJL057C	IKS1	None	None	orf19.428	ca4053	IKS1	KOG0032	T	Ca2+/calmodulin-dependent protein kinase, EF-Hand protein superfamily	other/IKS protein kinase	Putative serine/threonine kinase; expression is induced during mild heat stress; deletion mutants are hypersensitive to copper sulphate and resistant to sorbate; interacts with an N-terminal fragment of Sst2p	None	PROBABLE SERINE/THREONINE-PROTEIN KINASE	Sce_OS-up_2.0	None	Sce_XS-up_2.0	None	Sce_HS-up_2.0	None	Sce_CSR-up_2.0	None	None	None	None	None	None	None	None	None	None	None	None	None	None	None	None	None	None	None	None	None	None	None	None	None	None	None
163.m06403	CNAG_07400	YLL018C	DPS1	SPCC1223.07c	None	orf19.2407	ca3052	DPS1	KOG0556	J	Aspartyl-tRNA synthetase	aspartate-tRNA ligase	Cytoplasmic aspartyl-tRNA synthetase, homodimeric enzyme that catalyzes the specific aspartylation of tRNA(Asp); class II aminoacyl tRNA synthetase; binding to its own mRNA may confer autoregulation	aspartate-tRNA ligase (predicted)	aspartyl-tRNA synthetase (by homology)	None	None	None	None	None	None	None	None	None	None	None	None	None	None	None	None	None	None	None	None	None	None	None	None	None	None	None	None	None	None	None	None	None	None
163.m06410	CNAG_06852	None	None	None	None	None	None	None	None	None	None	conserved hypothetical protein	None	None	None	None	None	None	None	None	None	None	None	None	None	None	None	None	None	None	None	None	None	None	None	None	None	None	None	None	None	None	None	None	None	None	None	None	None
163.m06413	CNAG_06838	YPL029W	SUV3	SPAC637.11	suv3	orf19.4519	ca2908	SUV3	KOG0953	A	Mitochondrial RNA helicase SUV3, DEAD-box superfamily	mitochondrial RNA helicase	ATP-dependent RNA helicase, component of the mitochondrial degradosome along with the RNase Dss1p; the degradosome associates with the ribosome and mediates turnover of aberrant or unprocessed RNAs	mitochondrial ATP-dependent RNA helicase Suv3 (predicted)	ATP-dependent RNA helicase, mitochondrial (by homology)	None	None	None	None	None	None	None	None	None	None	None	None	None	None	None	None	None	None	None	None	None	None	None	None	None	None	None	None	None	Cal_XS-dw_1.5	None	None	None	None
163.m06415	CNAG_06835	YPR159W	KRE6	SPAC23H3.11c	None	None	None	None	None	None	None	glucosidase	Protein required for beta-1,6 glucan biosynthesis; putative beta-glucan synthase; appears functionally redundant with Skn1p	glucosidase (predicted)	None	None	None	None	None	Sce_HS-up_2.0	None	None	None	None	None	None	None	None	None	None	None	None	None	None	None	None	None	None	None	None	None	None	None	None	None	None	None	None	None
163.m06424	CNAG_01230	None	None	None	None	None	None	None	None	None	None	chitin deacetylase 2	None	None	None	None	None	None	None	None	None	None	None	None	None	None	None	None	None	None	None	None	None	None	None	None	None	None	None	None	None	None	None	None	None	None	None	None	None
163.m06431	CNAG_01209	YFR019W	FAB1	SPBC3E7.01	fab1	orf19.1513	ca2179	FAB1	KOG0230	T	Phosphatidylinositol-4-phosphate 5-kinase and related FYVE finger-containing proteins	1-phosphatidylinositol-3-phosphate 5-kinase	1-phosphatidylinositol-3-phosphate 5-kinase; vacuolar membrane kinase that generates phosphatidylinositol (3,5)P2, which is involved in vacuolar sorting and homeostasis	1-phosphatidylinositol-3-phosphate 5-kinase Fab1	phosphatidylinositol 3-phosphate 5-kinase (by homology)	None	None	None	None	Sce_HS-up_2.0	None	None	None	None	None	None	None	None	None	None	None	None	None	None	None	None	None	None	None	None	None	None	None	None	None	None	None	None	None
163.m06436	CNAG_01251	YKL010C	UFD4	SPAC12B10.01c	None	orf19.3237	ca5435	UFD4	KOG0170	O	E3 ubiquitin protein ligase	ubiquitin fusion degradation protein 4	Ubiquitin-protein ligase (E3) that interacts with Rpt4p and Rpt6p, two subunits of the 19S particle of the 26S proteasome; cytoplasmic E3 involved in the degradation of ubiquitin fusion proteins	ubiquitin-protein ligase E3 (predicted)	ubiquitin fusion degradation protein (by homology)	None	None	None	None	None	None	None	None	None	None	Spo_XS-up_2.0	None	None	None	None	None	None	None	None	None	None	None	None	None	None	None	None	None	None	None	None	None	None	None
163.m06439	CNAG_01253	YHR005C-A	MRS11	SPAC222.03c	tim10	orf19.4577.3	ca5140	TIM10	KOG3480	U	Mitochondrial import inner membrane translocase, subunits TIM10/TIM12	protein transporter	Essential protein of the mitochondrial intermembrane space, forms a complex with Tim9p (TIM10 complex) that mediates insertion of hydrophobic proteins at the inner membrane, has homology to Mrs5p, which is also involved in this process	Tim9-Tim10 complex subunit Tim10 (predicted)	Subunit of the Tim22-complex (by homology)	None	None	None	None	None	Sce_HS-dw_2.0	None	None	None	None	None	None	None	None	None	None	None	None	None	None	None	None	None	None	None	None	None	None	None	None	None	None	None	None
163.m06447	CNAG_01262	YOR212W	STE4	SPBC32H8.07	git5	orf19.799	ca0438	STE4	KOG0286	R	G-protein beta subunit	G-protein beta subunit GPB1	G protein beta subunit, forms a dimer with Ste18p to activate the mating signaling pathway, forms a heterotrimer with Gpa1p and Ste18p to dampen signaling; may recruit Rho1p to the polarized growth site during mating; contains WD40 repeats	heterotrimeric G protein beta subunit Git5	GTP-binding protein beta subunit of the pheromone pathway, 5-prime end (by homology)	None	None	None	Sce_XS-dw_2.0	None	Sce_HS-dw_2.0	None	None	Spo_OS-up_2.0	None	Spo_XS-up_2.0	None	Spo_Cd-up_2.0	None	Spo_CESR-up	None	None	None	None	None	None	None	None	None	None	None	None	None	None	None	None	None	None	None
163.m06454	CNAG_01271	YJR050W	ISY1	SPBC32F12.05c	cwf12	orf19.6685	ca4288	IPF6662	KOG3068	A	mRNA splicing factor	pre-mRNA-splicing factor ISY1	Component of the spliceosome complex involved in pre-mRNA splicing, auxiliary splicing factor that may modulate Syf1p activity and help optimize splicing; isy1 syf2 double mutation activates the spindle checkpoint, causing cell cycle arrest	complexed with Cdc5 protein Cwf12	similar to Saccharomyces cerevisiae Isy1p pre-mRNA splicing factor (by homology)	Sce_OS-up_2.0	None	None	None	None	None	None	None	None	None	None	None	None	None	None	None	None	None	None	None	None	None	None	None	None	None	None	None	None	None	None	None	None	None
163.m06459	CNAG_01276	YLR383W	SMC6	SPCC5E4.06	smc6	orf19.6568	ca4880	RHC18	KOG0250	L	DNA repair protein RAD18 (SMC family protein)	conserved hypothetical protein	Protein involved in structural maintenance of chromosomes; essential subunit of Mms21-Smc5-Smc6 complex; required for growth, DNA repair, interchromosomal and sister chromatid recombination; homologous to S. pombe rad18	Smc5-6 complex SMC subunit Smc6	Recombination repair protein (by homology)	None	None	None	None	None	None	None	None	None	None	None	None	None	None	None	None	None	None	None	None	None	None	None	None	None	None	None	None	None	None	None	None	None	None
163.m06460	CNAG_01274	YNL287W	SEC21	SPAC57A7.10c	sec21	orf19.759	ca1931	IPF3905	KOG1078	U	Vesicle coat complex COPI, gamma subunit	coatomer subunit gamma	Gamma subunit of coatomer, a heptameric protein complex that together with Arf1p forms the COPI coat; involved in ER to Golgi transport of selective cargo	coatomer gamma subunit Sec21 (predicted)	similar to Saccharomyces cerevisiae Sec21p coatomer complex gamma chain (gamma-COP) of secretory pathway vesicles (by homology)	None	None	None	None	None	None	None	None	None	None	None	None	None	None	None	None	None	None	None	None	None	None	None	None	None	None	None	None	None	None	None	None	None	None
163.m06461	CNAG_01272	None	None	None	None	None	None	None	KOG3695	S	Uncharacterized conserved protein	hypothetical protein	None	None	None	None	None	None	None	None	None	None	None	None	None	None	None	None	None	None	None	None	None	None	None	None	None	None	None	None	None	None	None	None	None	None	None	None	None
163.m06462	CNAG_01264	YIL094C	LYS12	SPAC31G5.04	None	orf19.2525	ca1737	LYS12	KOG0785	E	Isocitrate dehydrogenase, alpha subunit	isocitrate dehydrogenase	Homo-isocitrate dehydrogenase, an NAD-linked mitochondrial enzyme required for the fourth step in the biosynthesis of lysine, in which homo-isocitrate is oxidatively decarboxylated to alpha-ketoadipate	homoisocitrate dehydrogenase	homo-isocitrate dehydrogenase (by homology)	None	None	None	Sce_XS-dw_2.0	None	Sce_HS-dw_2.0	None	None	None	None	None	None	None	None	None	None	None	None	Cal_XS-up	None	None	None	Cal_SSR.XS-up	None	None	None	None	None	None	None	None	None	None	None
163.m06477	CNAG_01290	None	None	None	None	None	None	None	None	None	None	conserved hypothetical protein	None	None	None	None	None	None	None	None	None	None	None	None	None	None	None	None	None	None	None	None	None	None	None	None	None	None	None	None	None	None	None	None	None	None	None	None	None
163.m06480	CNAG_01298	YML059C	NTE1	SPCC4B3.04c	nte1	orf19.6396	None	None	KOG2968	R	Predicted esterase of the alpha-beta hydrolase superfamily (Neuropathy target esterase), contains cAMP-binding domains	hydrolase	Serine esterase that deacylates exogenous lysophospholipids, homolog of human neuropathy target esterase (NTE); mammalian NTE1 deacylates phosphatidylcholine to glycerophosphocholine	lysophospholipase	None	None	None	None	None	None	None	None	None	None	None	None	None	None	None	None	None	None	None	None	None	None	None	None	None	None	None	None	None	None	None	None	None	None	None
163.m06487	CNAG_01310	YCR016W	None	None	None	orf19.6730	ca4355	IPF3649	KOG4829	S	Uncharacterized conserved protein	nucleolar protein	None	None	unknown function	None	Sce_OS-dw_2.0	None	Sce_XS-dw_2.0	None	Sce_HS-dw_2.0	None	Sce_CSR-dw_2.0	None	None	None	None	None	None	None	None	None	None	None	None	None	Cal_HS-dw	None	Cal_SSR.HS-dw	None	None	None	None	None	None	None	None	None	None
163.m06491	CNAG_07427	YPL204W	HRR25	SPBC3H7.15	hhp1	orf19.3476	ca2902	HRR25	KOG1164	T	Casein kinase (serine/threonine/tyrosine protein kinase)	CAMK/CAMKL/CHK1 protein kinase	Protein kinase involved in regulating diverse events including vesicular trafficking, DNA repair, and chromosome segregation; binds the CTD of RNA pol II; homolog of mammalian casein kinase 1delta (CK1delta)	serine/threonine protein kinase Hhp1	casein kinase I (by homology)	None	None	None	None	None	None	None	None	None	None	None	None	None	None	None	None	None	None	None	None	None	None	None	None	None	None	None	None	None	None	None	None	None	None
163.m06504	CNAG_01323	YDR529C	QCR7	SPCC737.02c	qcr7	orf19.5629	ca2764	QCR7	KOG3440	C	Ubiquinol cytochrome c reductase, subunit QCR7	ubiquinol-cytochrome-c reductase	Subunit 7 of the ubiquinol cytochrome-c reductase complex, which is a component of the mitochondrial inner membrane electron transport chain; oriented facing the mitochondrial matrix; N-terminus appears to play a role in complex assembly	ubiquinol-cytochrome-c reductase complex subunit 6	ubiquinol--cytochrome-c reductase subunit 7 (by homology)	None	None	None	None	Sce_HS-up_2.0	None	None	None	None	None	None	None	None	None	None	None	None	None	None	None	None	None	None	None	None	None	None	None	None	None	None	None	None	None
163.m06520	CNAG_01347	None	None	SPBC543.02c	None	orf19.3592	ca0872	IPF13100	KOG0624	V	dsRNA-activated protein kinase inhibitor P58, contains TPR and DnaJ domains	co-chaperone	None	DNAJ/TPR domain protein DNAJC7 family	unknown function	None	None	None	None	None	None	None	None	None	None	None	None	None	None	None	None	None	None	None	None	None	None	None	None	None	None	None	None	None	None	None	None	None	None
163.m06521	CNAG_01344	None	None	None	None	None	None	None	KOG1843	S	Uncharacterized conserved protein	conserved hypothetical protein	None	None	None	None	None	None	None	None	None	None	None	None	None	None	None	None	None	None	None	None	None	None	None	None	None	None	None	None	None	None	None	None	None	None	None	None	None
163.m06523	CNAG_01341	None	None	None	None	None	None	None	KOG1735	Z	Actin depolymerizing factor	mannose-6-phosphate isomerase	None	None	None	None	None	None	None	None	None	None	None	None	None	None	None	None	None	None	None	None	None	None	None	None	None	None	None	None	None	None	None	None	None	None	None	None	None
163.m06524	CNAG_01341	None	None	None	None	None	None	None	KOG1735	Z	Actin depolymerizing factor	mannose-6-phosphate isomerase	None	None	None	None	None	None	None	None	None	None	None	None	None	None	None	None	None	None	None	None	None	None	None	None	None	None	None	None	None	None	None	None	None	None	None	None	None
163.m06562	None	None	None	None	None	None	None	None	None	None	None	None	None	None	None	None	None	None	None	None	None	None	None	None	None	None	None	None	None	None	None	None	None	None	None	None	None	None	None	None	None	None	None	None	None	None	None	None	None
163.m06575	CNAG_00902	None	None	None	None	None	None	None	KOG4267	S	Predicted membrane protein	conserved hypothetical protein	None	None	None	None	None	None	None	None	None	None	None	None	None	None	None	None	None	None	None	None	None	None	None	None	None	None	None	None	None	None	None	None	None	None	None	None	None
163.m06577	CNAG_01185	YBR101C	FES1	SPBC3B9.01	None	orf19.3649	ca0147	IPF9690	KOG2160	O	Armadillo/beta-catenin-like repeat-containing protein	hsp70-like protein	Hsp70 (Ssa1p) nucleotide exchange factor, cytosolic homolog of Sil1p, which is the nucleotide exchange factor for BiP (Kar2p) in the endoplasmic reticulum	Hsp70 nucleotide exchange factor (predicted)	unknown function	None	None	None	None	Sce_HS-up_2.0	None	None	None	None	None	None	Spo_XS-dw_2.0	Spo_Cd-up_2.0	None	None	None	None	None	None	None	None	None	None	None	None	None	None	None	None	None	None	None	None	None
163.m06604	CNAG_07415	None	None	None	None	None	None	None	None	None	None	conserved hypothetical protein	None	None	None	None	None	None	None	None	None	None	None	None	None	None	None	None	None	None	None	None	None	None	None	None	None	None	None	None	None	None	None	None	None	None	None	None	None
164.m01516	CNAG_06116	None	None	None	None	None	None	None	KOG1110	R	Putative steroid membrane receptor Hpr6.6/25-Dx	conserved hypothetical protein	None	None	None	None	None	None	None	None	None	None	None	None	None	None	None	None	None	None	None	None	None	None	None	None	None	None	None	None	None	None	None	None	None	None	None	None	None
164.m01592	CNAG_00127	None	None	None	None	None	None	None	None	None	None	conserved hypothetical protein	None	None	None	None	None	None	None	None	None	None	None	None	None	None	None	None	None	None	None	None	None	None	None	None	None	None	None	None	None	None	None	None	None	None	None	None	None
164.m01643	CNAG_05998	None	None	None	None	None	None	None	KOG0393	R	Ras-related small GTPase, Rho type	rho GTPase	None	None	None	None	None	None	None	None	None	None	None	None	None	None	None	None	None	None	None	None	None	None	None	None	None	None	None	None	None	None	None	None	None	None	None	None	None
164.m01652	CNAG_06008	YDR321W	ASP1	SPAC977.12	None	None	None	None	KOG0503	E	Asparaginase	asparaginase	Cytosolic L-asparaginase, involved in asparagine catabolism	L-asparaginase (predicted)	None	None	None	None	Sce_XS-dw_2.0	None	Sce_HS-dw_2.0	None	None	None	None	None	Spo_XS-dw_2.0	None	None	None	None	None	None	None	None	None	None	None	None	None	None	None	None	None	None	None	None	None	None
164.m02001	CNAG_07703	None	None	None	None	None	None	None	None	None	None	conserved hypothetical protein	None	None	None	None	None	None	None	None	None	None	None	None	None	None	None	None	None	None	None	None	None	None	None	None	None	None	None	None	None	None	None	None	None	None	None	None	None
164.m02040	CNAG_06016	None	None	None	None	None	None	None	KOG2169	K	Zn-finger transcription factor	CAP6p	None	None	None	None	None	None	None	None	None	None	None	None	None	None	None	None	None	None	None	None	None	None	None	None	None	None	None	None	None	None	None	None	None	None	None	None	None
164.m02045	CNAG_06006	None	None	None	None	None	None	None	None	None	None	conserved hypothetical protein	None	None	None	None	None	None	None	None	None	None	None	None	None	None	None	None	None	None	None	None	None	None	None	None	None	None	None	None	None	None	None	None	None	None	None	None	None
164.m02100	CNAG_06114	YOR089C	VPS21	SPAC6F6.15	ypt5	orf19.589	ca3428	VPS21	KOG0092	U	GTPase Rab5/YPT51 and related small G protein superfamily GTPases	GTPase	GTPase required for transport during endocytosis and for correct sorting of vacuolar hydrolases; localized in endocytic intermediates; detected in mitochondria; geranylgeranylation required for membrane association; mammalian Rab5 homolog	GTPase Ypt5	GTP-binding protein (by homology)	None	None	None	None	None	None	None	None	None	None	None	None	None	None	None	None	None	None	None	None	None	None	None	None	None	None	None	None	Cal_XS-up_1.5	None	None	None	None	None
164.m02103	CNAG_06120	YDL142C	CRD1	None	None	orf19.6100	ca3856	IPF4641	KOG1617	I	CDP-alcohol phosphatidyltransferase/Phosphatidylglycerol-phosphate synthase	cardiolipin synthase	Cardiolipin synthase; produces cardiolipin, which is an important constituent of mitochondrial membranes; required for normal mitochondrial membrane potential and function	None	similar to Saccharomyces cerevisiae Crd1p cardiolipin synthase (by homology)	None	None	None	None	None	None	None	None	None	None	None	None	None	None	None	None	None	None	None	None	None	None	None	None	None	None	None	None	None	None	None	None	None	None
164.m02109	CNAG_06134	None	None	None	None	None	None	None	KOG4343	K	bZIP transcription factor ATF6	conserved hypothetical protein	None	None	None	None	None	None	None	None	None	None	None	None	None	None	None	None	None	None	None	None	None	None	None	None	None	None	None	None	None	None	None	None	None	None	None	None	None
164.m02124	CNAG_06150	YMR186W	HSC82	SPAC926.04c	hsp90	orf19.6515	ca4959	HSP90	KOG0019	O	Molecular chaperone (HSP90 family)	heat-shock protein 90	Cytoplasmic chaperone of the Hsp90 family, redundant in function and nearly identical with Hsp82p, and together they are essential; expressed constitutively at 10-fold higher basal levels than HSP82 and induced 2-3 fold by heat shock	heat shock protein Hsp90	heat shock protein	None	None	None	None	Sce_HS-up_2.0	None	None	None	None	None	None	Spo_XS-dw_2.0	None	None	None	None	None	None	None	None	None	None	None	None	None	None	None	None	None	None	None	None	Cal_Cd-up_1.5	None
164.m02126	CNAG_06143	None	None	SPBC13G1.04c	None	None	None	None	KOG2731	A	DNA alkylation damage repair protein	conserved hypothetical protein	None	alkB homolog	None	None	None	None	None	None	None	None	None	None	None	None	Spo_XS-dw_2.0	None	None	None	None	None	None	None	None	None	None	None	None	None	None	None	None	None	None	None	None	None	None
164.m02133	CNAG_06122	None	None	None	None	None	None	None	KOG2914	R	Predicted haloacid-halidohydrolase and related hydrolases	glycerol-1-phosphatase	None	None	None	None	None	None	None	None	None	None	None	None	None	None	None	None	None	None	None	None	None	None	None	None	None	None	None	None	None	None	None	None	None	None	None	None	None
164.m02135	CNAG_06118	None	None	SPBC582.10c	None	None	None	None	KOG1001	KL	Helicase-like transcription factor HLTF/DNA helicase RAD5, DEAD-box superfamily	conserved hypothetical protein	None	ATP-dependent DNA helicase Rhp16b (predicted)	None	None	None	None	None	None	None	None	None	None	None	None	None	None	None	None	None	None	None	None	None	None	None	None	None	None	None	None	None	None	None	None	None	None	None
164.m02137	CNAG_06170	YJL068C	None	None	None	orf19.6596	ca3836	IPF8179	None	None	None	carboxylesterase	None	None	putative esterase (by homology)	None	None	None	None	Sce_HS-up_2.0	None	None	None	None	None	None	None	None	None	None	None	None	None	None	None	None	None	None	None	None	None	None	None	None	None	None	None	None	None
164.m02140	CNAG_06179	YDL001W	RMD1	SPCC16C4.01	sif2	orf19.3158	ca1269	IPF19726	KOG2861	S	Uncharacterized conserved protein	cytoplasmic protein	Cytoplasmic protein required for sporulation	Sad1 interacting factor 2	unknown function	None	None	None	Sce_XS-dw_2.0	None	None	None	None	None	None	None	None	None	None	None	None	None	None	None	None	None	None	None	None	None	None	None	None	None	None	None	None	None	None
164.m02152	CNAG_06169	None	None	SPBC1198.01	None	None	None	None	KOG0024	Q	Sorbitol dehydrogenase	R,R	None	glutathione-dependent formaldehyde dehydrogenase (predicted)	None	None	None	None	None	None	None	None	None	None	None	Spo_XS-up_2.0	None	None	None	None	None	None	None	None	None	None	None	None	None	None	None	None	None	None	None	None	None	None	None
164.m02160	CNAG_06207	None	None	None	None	None	None	None	None	None	None	conserved hypothetical protein	None	None	None	None	None	None	None	None	None	None	None	None	None	None	None	None	None	None	None	None	None	None	None	None	None	None	None	None	None	None	None	None	None	None	None	None	None
164.m02173	CNAG_06220	None	None	None	None	None	None	None	KOG1721	R	1 FOG: Zn-finger	allergen	None	None	None	None	None	None	None	None	None	None	None	None	None	None	None	None	None	None	None	None	None	None	None	None	None	None	None	None	None	None	None	None	None	None	None	None	None
164.m02180	CNAG_06205	None	None	None	None	None	None	None	None	None	None	conserved hypothetical protein	None	None	None	None	None	None	None	None	None	None	None	None	None	None	None	None	None	None	None	None	None	None	None	None	None	None	None	None	None	None	None	None	None	None	None	None	None
164.m02184	CNAG_06235	YBR261C	None	SPAC16E8.14c	None	orf19.7069	ca5627	IPF495	KOG3178	R	Hydroxyindole-O-methyltransferase and related SAM-dependent methyltransferases	conserved hypothetical protein	None	methyltransferase (predicted)	unknown function	None	None	None	None	None	None	None	None	None	None	None	None	None	None	None	None	None	Cal_OS-dw	None	None	None	None	None	Cal_SSR.OS-dw	None	None	None	None	None	None	None	None	None	None
164.m02185	CNAG_06239	None	None	None	None	None	None	None	KOG1146	R	Homeobox protein	conserved hypothetical protein	None	None	None	None	None	None	None	None	None	None	None	None	None	None	None	None	None	None	None	None	None	None	None	None	None	None	None	None	None	None	None	None	None	None	None	None	None
164.m02187	CNAG_06242	None	None	None	None	orf19.7219	ca5345	FTR1	None	None	None	high-affinity iron permease CaFTR1	None	None	high affinity iron permease	None	None	None	None	None	None	None	None	None	None	None	None	None	None	None	None	None	None	None	None	None	None	None	None	None	None	None	None	None	None	None	None	None	None
164.m02196	CNAG_07836	None	None	SPACUNK4.17	None	None	None	None	None	None	None	NAD binding dehydrogenase family protein	None	NAD binding dehydrogenase family protein	None	None	None	None	None	None	None	None	None	Spo_OS-up_2.0	None	Spo_XS-up_2.0	None	Spo_Cd-up_2.0	None	Spo_CESR-up	None	None	None	None	None	None	None	None	None	None	None	None	None	None	None	None	None	None	None
164.m02204	CNAG_06246	None	None	None	None	None	None	None	KOG4475	RP	FOG: Immunoglobin and related proteins	conserved hypothetical protein	None	None	None	None	None	None	None	None	None	None	None	None	None	None	None	None	None	None	None	None	None	None	None	None	None	None	None	None	None	None	None	None	None	None	None	None	None
164.m02218	CNAG_04246	None	None	None	None	None	None	None	KOG2280	U	Vacuolar assembly/sorting protein VPS16	conserved hypothetical protein	None	None	None	None	None	None	None	None	None	None	None	None	None	None	None	None	None	None	None	None	None	None	None	None	None	None	None	None	None	None	None	None	None	None	None	None	None
164.m02792	CNAG_06034	None	None	SPBC1683.05	None	None	None	None	KOG2466	FH	Uridine permease/thiamine transporter/allantoin transport	allantoin permease	None	membrane transporter (predicted)	None	None	None	None	None	None	None	None	None	None	None	None	None	None	None	None	None	None	None	None	None	None	None	None	None	None	None	None	None	None	None	None	None	None	None
164.m02798	CNAG_06134	None	None	None	None	None	None	None	KOG4343	K	bZIP transcription factor ATF6	conserved hypothetical protein	None	None	None	None	None	None	None	None	None	None	None	None	None	None	None	None	None	None	None	None	None	None	None	None	None	None	None	None	None	None	None	None	None	None	None	None	None
164.m02802	CNAG_06159	None	None	None	None	None	None	None	None	None	None	conserved hypothetical protein	None	None	None	None	None	None	None	None	None	None	None	None	None	None	None	None	None	None	None	None	None	None	None	None	None	None	None	None	None	None	None	None	None	None	None	None	None
164.m02808	CNAG_07907	None	None	None	None	None	None	None	KOG1134	R	Uncharacterized conserved protein	conserved hypothetical protein	None	None	None	None	None	None	None	None	None	None	None	None	None	None	None	None	None	None	None	None	None	None	None	None	None	None	None	None	None	None	None	None	None	None	None	None	None
164.m02814	CNAG_06191	None	None	None	None	None	None	None	None	None	None	conserved hypothetical protein	None	None	None	None	None	None	None	None	None	None	None	None	None	None	None	None	None	None	None	None	None	None	None	None	None	None	None	None	None	None	None	None	None	None	None	None	None
164.m02822	CNAG_06232	YNL108C	None	None	None	orf19.6559	ca4874	IPF1674	None	None	None	TFC7	None	None	putative transcription initiation factor (by homology)	None	None	None	Sce_XS-dw_2.0	None	None	None	None	None	None	None	None	None	None	None	None	None	Cal_OS-dw	None	None	None	None	None	Cal_SSR.OS-dw	None	None	None	None	Cal_XS-up_1.5	None	Cal_XS-up_2.0	None	None	None
164.m02826	CNAG_06087	None	None	SPCC1020.02	spc7	orf19.4557	ca1529	SPC105.5eoc	None	None	None	conserved hypothetical protein	None	kinetochore protein Spc7	Spindle pole body protein (by homology)	None	None	None	None	None	None	None	None	None	None	None	None	None	None	None	None	None	None	None	None	None	None	None	None	None	None	None	None	None	None	None	None	None	None
164.m02830	CNAG_06109	None	None	None	None	None	None	None	KOG0845	YU	Nuclear pore complex, Nup98 component (sc Nup145/Nup100/Nup116)	conserved hypothetical protein	None	None	None	None	None	None	None	None	None	None	None	None	None	None	None	None	None	None	None	None	None	None	None	None	None	None	None	None	None	None	None	None	None	None	None	None	None
167.m03194	CNAG_02529	None	None	None	None	None	None	None	None	None	None	conserved hypothetical protein	None	None	None	None	None	None	None	None	None	None	None	None	None	None	None	None	None	None	None	None	None	None	None	None	None	None	None	None	None	None	None	None	None	None	None	None	None
167.m03257	CNAG_02458	YFL047W	RGD2	SPAC13A11.01c	rga8	orf19.730	ca3679	IPF20142	None	None	None	GTPase activating protein	GTPase-activating protein (RhoGAP) for Cdc42p and Rho5p	GTPase activating protein Rga8	unknown function	None	None	None	None	None	Sce_HS-dw_2.0	None	None	None	None	None	None	None	None	None	None	None	None	None	None	None	None	None	None	None	None	None	None	Cal_XS-up_1.5	None	None	None	None	None
167.m03310	CNAG_02399	YPL091W	GLR1	SPBC17A3.07	pgr1	orf19.4147	ca3086	GLR1	KOG0405	Q	Pyridine nucleotide-disulphide oxidoreductase	glutathione-disulfide reductase	Cytosolic and mitochondrial glutathione oxidoreductase, converts oxidized glutathione to reduced glutathione	glutathione reductase	by similarity to S. cerev. and C. albicans:glutathione reductase	None	None	Sce_XS-up_2.0	None	None	None	None	None	None	None	None	None	None	None	None	None	None	None	None	None	None	None	None	None	None	None	None	None	Cal_XS-up_1.5	None	Cal_XS-up_2.0	None	None	None
167.m03334	CNAG_02366	None	None	None	None	orf19.854	ca0773	UGA11.5f	KOG1405	E	4-aminobutyrate aminotransferase	4-aminobutyrate aminotransferase	None	None	4-aminobutyrate aminotransferase, exon 1 (by homology)	None	None	None	None	None	None	None	None	None	None	None	None	None	None	None	None	None	None	None	None	None	None	None	None	None	None	None	None	None	None	None	None	None	None
167.m03336	CNAG_02364	None	None	None	None	None	None	None	None	None	None	conserved hypothetical protein	None	None	None	None	None	None	None	None	None	None	None	None	None	None	None	None	None	None	None	None	None	None	None	None	None	None	None	None	None	None	None	None	None	None	None	None	None
167.m03404	CNAG_07635	YIL144W	TID3	SPBC11C11.03	ndc80	orf19.2827	ca0770	IPF10963	KOG0995	D	Centromere-associated protein HEC1	conserved hypothetical protein	Component of the evolutionarily conserved kinetochore-associated Ndc80 complex (Ndc80p-Nuf2p-Spc24p-Spc25p); conserved coiled-coil protein involved in chromosome segregation, spindle checkpoint activity, kinetochore assembly and clustering	spindle pole body protein Ndc80	unknown	Sce_OS-up_2.0	None	None	None	None	None	None	None	None	None	None	None	None	None	None	None	None	None	None	None	None	None	None	None	None	None	None	None	None	None	None	None	None	None
167.m03456	CNAG_02230	None	None	SPBC24C6.09c	None	None	None	None	None	None	None	phosphoketolase	None	phosphoketolase (predicted)	None	None	None	None	None	None	None	None	None	Spo_OS-up_2.0	None	Spo_XS-up_2.0	None	Spo_Cd-up_2.0	None	Spo_CESR-up	None	None	None	None	None	None	None	None	None	None	None	None	None	None	None	None	None	None	None
167.m03502	CNAG_02182	YOL151W	GRE2	SPAC513.07	None	orf19.5611	ca2963	GRP3	KOG1502	V	Flavonol reductase/cinnamoyl-CoA reductase	D-lactaldehyde dehydrogenase	3-methylbutanal reductase and NADPH-dependent methylglyoxal reductase (D-lactaldehyde dehydrogenase); stress induced (osmotic, ionic, oxidative, heat shock and heavy metals); regulated by the HOG pathway	flavonol reductase/cinnamoyl-CoA reductase family	dihydroflavonol-4-reductases (by homology)	Sce_OS-up_2.0	None	Sce_XS-up_2.0	None	Sce_HS-up_2.0	None	Sce_CSR-up_2.0	None	Spo_OS-up_2.0	None	Spo_XS-up_2.0	None	Spo_Cd-up_2.0	None	Spo_CESR-up	None	None	None	None	None	None	None	None	None	None	None	None	None	None	None	None	None	None	None
167.m03506	CNAG_02177	YDL188C	PPH22	SPBC16H5.07c	ppa2	orf19.1683	ca0425	PPH21	KOG0371	T	Serine/threonine protein phosphatase 2A, catalytic subunit	serine/threonine protein phosphatase PP2A catalytic subunit	Catalytic subunit of protein phosphatase 2A, functionally redundant with Pph21p; methylated at C terminus; forms alternate complexes with several regulatory subunits; involved in signal transduction and regulation of mitosis	serine/threonine protein phosphatase Ppa2	protein ser/thr phosphatase PP2A-1 (by homology)	None	None	None	None	None	None	None	None	None	None	Spo_XS-up_2.0	None	None	None	None	None	None	None	None	None	None	None	None	None	Cal_OS-up_1.5	None	None	None	None	None	None	None	None	None
167.m03538	CNAG_02143	None	None	None	None	None	None	None	KOG0017	R	FOG: Transposon-encoded proteins with TYA, reverse transcriptase, integrase domains in various combinations	conserved hypothetical protein	None	None	None	None	None	None	None	None	None	None	None	None	None	None	None	None	None	None	None	None	None	None	None	None	None	None	None	None	None	None	None	None	None	None	None	None	None
167.m03575	CNAG_02100	YPL231W	FAS2	SPAC4A8.11c	fas2	orf19.5949	ca6107	FAS2.3f	None	None	None	fatty-acid synthase complex protein	Alpha subunit of fatty acid synthetase, which catalyzes the synthesis of long-chain saturated fatty acids; contains beta-ketoacyl reductase and beta-ketoacyl synthase activities; phosphorylated	fatty acid synthase alpha subunit Lsd1	fatty-acyl-CoA synthase, alpha chain, 3-prime end	None	None	None	Sce_XS-dw_2.0	None	None	None	None	None	None	None	None	None	None	None	None	None	Cal_OS-dw	None	None	None	None	None	Cal_SSR.OS-dw	None	Cal_OS-dw_1.5	None	None	None	None	None	None	None	None
167.m03576	CNAG_02099	YKL182W	FAS1	SPAC926.09c	fas1	orf19.979	ca5426	FAS1	None	None	None	fatty acid synthase beta subunit	Beta subunit of fatty acid synthetase, which catalyzes the synthesis of long-chain saturated fatty acids; contains acetyltransacylase, dehydratase, enoyl reductase, malonyl transacylase, and palmitoyl transacylase activities	fatty acid synthase beta subunit Fas1	Fatty-acyl-CoA synthase, beta chain.	None	None	None	None	None	None	None	None	None	None	None	None	None	None	None	None	None	Cal_OS-dw	None	None	None	None	None	Cal_SSR.OS-dw	None	Cal_OS-dw_1.5	None	None	None	None	None	None	None	None
167.m03586	CNAG_02089	None	None	None	None	None	None	None	KOG4177	M	Ankyrin	conserved hypothetical protein	None	None	None	None	None	None	None	None	None	None	None	None	None	None	None	None	None	None	None	None	None	None	None	None	None	None	None	None	None	None	None	None	None	None	None	None	None
167.m03605	CNAG_02070	None	None	None	None	None	None	None	KOG1808	R	AAA ATPase containing von Willebrand factor type A (vWA) domain	conserved hypothetical protein	None	None	None	None	None	None	None	None	None	None	None	None	None	None	None	None	None	None	None	None	None	None	None	None	None	None	None	None	None	None	None	None	None	None	None	None	None
167.m03628	CNAG_02041	None	None	None	None	None	None	None	KOG1558	P	Fe2+/Zn2+ regulated transporter	conserved hypothetical protein	None	None	None	None	None	None	None	None	None	None	None	None	None	None	None	None	None	None	None	None	None	None	None	None	None	None	None	None	None	None	None	None	None	None	None	None	None
167.m03636	CNAG_02033	None	None	None	None	None	None	None	None	None	None	conserved hypothetical protein	None	None	None	None	None	None	None	None	None	None	None	None	None	None	None	None	None	None	None	None	None	None	None	None	None	None	None	None	None	None	None	None	None	None	None	None	None
167.m03638	CNAG_02030	None	None	None	None	None	None	None	None	None	None	glyoxal oxidase	None	None	None	None	None	None	None	None	None	None	None	None	None	None	None	None	None	None	None	None	None	None	None	None	None	None	None	None	None	None	None	None	None	None	None	None	None
167.m03643	CNAG_02024	None	None	None	None	None	None	None	None	None	None	conserved hypothetical protein	None	None	None	None	None	None	None	None	None	None	None	None	None	None	None	None	None	None	None	None	None	None	None	None	None	None	None	None	None	None	None	None	None	None	None	None	None
167.m03648	CNAG_02020	YGR002C	SWC4	SPAC9G1.13c	None	orf19.7492	ca5838	IPF424	KOG2656	BK	DNA methyltransferase 1-associated protein-1	SWR1-complex protein 4	Component of the Swr1p complex that incorporates Htz1p into chromatin; component of the NuA4 histone acetyltransferase complex	histone acetyltransferase complex subunit Swc4 (predicted)	unknown function	None	None	None	None	None	None	None	None	None	None	None	None	None	None	None	None	None	None	None	None	None	None	None	None	None	None	None	None	None	None	None	None	None	None
167.m03694	CNAG_02335	None	None	None	None	None	None	None	KOG3870	S	Uncharacterized conserved protein	UPF0364 protein	None	None	None	None	None	None	None	None	None	None	None	None	None	None	None	None	None	None	None	None	None	None	None	None	None	None	None	None	None	None	None	None	None	None	None	None	None
167.m03706	CNAG_02182	YOL151W	GRE2	SPAC513.07	None	orf19.5611	ca2963	GRP3	KOG1502	V	Flavonol reductase/cinnamoyl-CoA reductase	D-lactaldehyde dehydrogenase	3-methylbutanal reductase and NADPH-dependent methylglyoxal reductase (D-lactaldehyde dehydrogenase); stress induced (osmotic, ionic, oxidative, heat shock and heavy metals); regulated by the HOG pathway	flavonol reductase/cinnamoyl-CoA reductase family	dihydroflavonol-4-reductases (by homology)	Sce_OS-up_2.0	None	Sce_XS-up_2.0	None	Sce_HS-up_2.0	None	Sce_CSR-up_2.0	None	Spo_OS-up_2.0	None	Spo_XS-up_2.0	None	Spo_Cd-up_2.0	None	Spo_CESR-up	None	None	None	None	None	None	None	None	None	None	None	None	None	None	None	None	None	None	None
167.m03709	CNAG_02091	YKR048C	NAP1	SPCC364.06	nap1	orf19.7501	ca5845	NAP1	KOG1507	BD	Nucleosome assembly protein NAP-1	nucleosome assembly protein	Protein that interacts with mitotic cyclin Clb2p; required for the regulation of microtubule dynamics during mitosis; controls bud morphogenesis; involved in the transport of H2A and H2B histones to the nucleus; phosphorylated by CK2	nucleosome assembly protein Nap1 (predicted)	nucleosome assembly protein (by homology)	None	None	None	Sce_XS-dw_2.0	None	None	None	None	None	None	None	None	None	None	None	None	None	None	None	None	None	None	None	None	None	None	None	None	None	None	None	None	None	None
167.m05759	CNAG_02541	YGR233C	PHO81	None	None	orf19.7475	ca5821	PHO81	KOG0504	R	FOG: Ankyrin repeat	cyclin-dependent protein kinase inhibitor	Cyclin-dependent kinase (CDK) inhibitor, regulates Pho80p-Pho85p and Pcl7p-Pho85p cyclin-CDK complexes in response to phosphate levels; inhibitory activity for Pho80p-Pho85p requires myo-D-inositol heptakisphosphate (IP7) generated by Vip1p	None	Cyclin-dependent kinase inhibitor (by homology)	None	None	None	None	None	None	None	None	None	None	None	None	None	None	None	None	None	None	None	None	None	None	None	None	None	None	None	None	None	None	None	None	None	None
167.m05778	CNAG_06865	None	None	None	None	None	None	None	None	None	None	conserved hypothetical protein	None	None	None	None	None	None	None	None	None	None	None	None	None	None	None	None	None	None	None	None	None	None	None	None	None	None	None	None	None	None	None	None	None	None	None	None	None
167.m05809	CNAG_06871	None	None	SPCC757.04	None	None	None	None	None	None	None	conserved hypothetical protein	None	transcription factor (predicted)	None	None	None	None	None	None	None	None	None	None	None	Spo_XS-up_2.0	None	None	None	None	None	None	None	None	None	None	None	None	None	None	None	None	None	None	None	None	None	None	None
167.m05821	CNAG_07649	None	None	None	None	None	None	None	None	None	None	hypothetical protein	None	None	None	None	None	None	None	None	None	None	None	None	None	None	None	None	None	None	None	None	None	None	None	None	None	None	None	None	None	None	None	None	None	None	None	None	None
167.m05824	CNAG_02048	YLR142W	PUT1	SPCC70.03c	None	orf19.4274	ca1552	PUT1	KOG0186	E	Proline oxidase	proline dehydrogenase	Proline oxidase, nuclear-encoded mitochondrial protein involved in utilization of proline as sole nitrogen source; PUT1 transcription is induced by Put3p in the presence of proline and the absence of a preferred nitrogen source	proline dehydrogenase	proline oxidase (by homology)	None	None	None	None	Sce_HS-up_2.0	None	None	None	None	None	None	None	None	None	None	None	None	None	None	None	None	None	None	None	None	None	None	None	None	None	None	None	None	None
167.m05828	CNAG_02060	None	None	None	None	None	None	None	KOG2510	B	SWI-SNF chromatin-remodeling complex protein	conserved hypothetical protein	None	None	None	None	None	None	None	None	None	None	None	None	None	None	None	None	None	None	None	None	None	None	None	None	None	None	None	None	None	None	None	None	None	None	None	None	None
167.m05833	CNAG_02071	YNL233W	BNI4	None	None	orf19.4457	ca1366	IPF11847	None	None	None	conserved hypothetical protein	Targeting subunit for Glc7p protein phosphatase, localized to the bud neck, required for localization of chitin synthase III to the bud neck via interaction with the chitin synthase III regulatory subunit Skt5p	None	unknown function	None	None	None	None	None	None	None	None	None	None	None	None	None	None	None	None	None	None	None	None	None	None	None	None	None	None	None	None	None	None	None	None	None	None
167.m05840	CNAG_02135	None	None	None	None	None	None	None	None	None	None	conserved hypothetical protein	None	None	None	None	None	None	None	None	None	None	None	None	None	None	None	None	None	None	None	None	None	None	None	None	None	None	None	None	None	None	None	None	None	None	None	None	None
167.m05853	CNAG_02139	YHR001W	OSH7	SPCC23B6.01c	None	orf19.3198	ca0759	IPF11167	KOG2210	T	Oxysterol-binding protein	oxysterol-binding protein family	Member of an oxysterol-binding protein family with seven members in S. cerevisiae; family members have overlapping, redundant functions in sterol metabolism and collectively perform a function essential for viability	oxysterol binding protein (predicted)	unknown function	None	None	None	None	None	None	None	None	None	None	None	None	None	None	None	None	None	None	None	None	None	None	None	None	None	None	None	None	None	None	None	None	None	None
167.m05860	CNAG_02156	None	None	None	None	None	None	None	None	None	None	conserved hypothetical protein	None	None	None	None	None	None	None	None	None	None	None	None	None	None	None	None	None	None	None	None	None	None	None	None	None	None	None	None	None	None	None	None	None	None	None	None	None
167.m05887	CNAG_02267	None	None	None	None	None	None	None	KOG1036	D	Mitotic spindle checkpoint protein BUB3, WD repeat superfamily	spindle assembly checkpoint protein SLDB	None	None	None	None	None	None	None	None	None	None	None	None	None	None	None	None	None	None	None	None	None	None	None	None	None	None	None	None	None	None	None	None	None	None	None	None	None
167.m05890	CNAG_02260	None	None	SPCC1020.12c	None	None	None	None	KOG2894	S	Uncharacterized conserved protein XAP-5	family with sequence similarity 50	None	xap-5-like protein	None	None	None	None	None	None	None	None	None	None	None	None	None	None	None	None	None	None	None	None	None	None	None	None	None	None	None	None	None	None	None	None	None	None	None
167.m05922	CNAG_02362	None	None	None	None	None	None	None	None	None	None	conserved hypothetical protein	None	None	None	None	None	None	None	None	None	None	None	None	None	None	None	None	None	None	None	None	None	None	None	None	None	None	None	None	None	None	None	None	None	None	None	None	None
167.m05930	CNAG_07634	None	None	None	None	None	None	None	KOG4645	T	MAPKKK (MAP kinase kinase kinase) SSK2 and related serine/threonine protein kinases	conserved hypothetical protein	None	None	None	None	None	None	None	None	None	None	None	None	None	None	None	None	None	None	None	None	None	None	None	None	None	None	None	None	None	None	None	None	None	None	None	None	None
167.m05931	CNAG_07634	None	None	None	None	None	None	None	KOG4645	T	MAPKKK (MAP kinase kinase kinase) SSK2 and related serine/threonine protein kinases	conserved hypothetical protein	None	None	None	None	None	None	None	None	None	None	None	None	None	None	None	None	None	None	None	None	None	None	None	None	None	None	None	None	None	None	None	None	None	None	None	None	None
176.m02142	None	None	None	None	None	None	None	None	None	None	None	None	None	None	None	None	None	None	None	None	None	None	None	None	None	None	None	None	None	None	None	None	None	None	None	None	None	None	None	None	None	None	None	None	None	None	None	None	None
176.m02151	CNAG_06915	None	None	None	None	None	None	None	KOG2301	PT	Voltage-gated Ca2+ channels, alpha1 subunits	conserved hypothetical protein	None	None	None	None	None	None	None	None	None	None	None	None	None	None	None	None	None	None	None	None	None	None	None	None	None	None	None	None	None	None	None	None	None	None	None	None	None
176.m02200	CNAG_02566	YNL068C	FKH2	None	None	None	None	None	KOG2294	K	Transcription factor of the Forkhead/HNF3 family	hepatocyte nuclear factor	Forkhead family transcription factor with a major role in the expression of G2/M phase genes; positively regulates transcriptional elongation; negative role in chromatin silencing at HML and HMR; substrate of the Cdc28p/Clb5p kinase	None	None	None	None	None	None	None	Sce_HS-dw_2.0	None	None	None	None	None	None	None	None	None	None	None	None	None	None	None	None	None	None	None	None	None	None	None	None	None	None	None	None
176.m02203	CNAG_02573	None	None	None	None	None	None	None	KOG4308	S	LRR-containing protein	conserved hypothetical protein	None	None	None	None	None	None	None	None	None	None	None	None	None	None	None	None	None	None	None	None	None	None	None	None	None	None	None	None	None	None	None	None	None	None	None	None	None
176.m02209	CNAG_02577	YMR272C	SCS7	SPAC19G12.08	None	orf19.3822	ca4852	SCS7	KOG0539	I	Sphingolipid fatty acid hydroxylase	oxidoreductase	Sphingolipid alpha-hydroxylase, functions in the alpha-hydroxylation of sphingolipid-associated very long chain fatty acids, has both cytochrome b5-like and hydroxylase/desaturase domains, not essential for growth	fatty acid hydroxylase (predicted)	Required for hydroxylation of ceramide (by homology)	None	None	None	Sce_XS-dw_2.0	None	None	None	None	None	None	None	None	None	None	None	None	None	None	None	None	None	None	None	None	None	None	None	None	Cal_XS-up_1.5	None	None	None	None	None
176.m02212	CNAG_02580	None	None	None	None	None	None	None	None	None	None	conserved hypothetical protein	None	None	None	None	None	None	None	None	None	None	None	None	None	None	None	None	None	None	None	None	None	None	None	None	None	None	None	None	None	None	None	None	None	None	None	None	None
176.m02241	CNAG_07567	None	None	None	None	None	None	None	None	None	None	conserved hypothetical protein	None	None	None	None	None	None	None	None	None	None	None	None	None	None	None	None	None	None	None	None	None	None	None	None	None	None	None	None	None	None	None	None	None	None	None	None	None
176.m02246	CNAG_07563	YOL033W	MSE1	SPAPB1A10.11c	None	orf19.2415	None	None	KOG1149	J	Glutamyl-tRNA synthetase (mitochondrial)	glutamyl-tRNA synthetase	Mitochondrial glutamyl-tRNA synthetase, encoded by a nuclear gene	glutamyl-tRNA synthetase, mitochondrial	None	None	None	None	None	Sce_HS-up_2.0	None	None	None	None	None	None	None	None	None	None	None	None	None	None	None	None	None	None	None	None	None	None	None	None	None	None	None	None	None
176.m02258	CNAG_07552	None	None	None	None	None	None	None	KOG1001	KL	Helicase-like transcription factor HLTF/DNA helicase RAD5, DEAD-box superfamily	DNA repair protein rad8	None	None	None	None	None	None	None	None	None	None	None	None	None	None	None	None	None	None	None	None	None	None	None	None	None	None	None	None	None	None	None	None	None	None	None	None	None
176.m02261	CNAG_07550	None	None	None	None	orf19.5362	ca5514	IPF730	KOG1361	L	Predicted hydrolase involved in interstrand cross-link repair	conserved hypothetical protein	None	None	unknown function	None	None	None	None	None	None	None	None	None	None	None	None	None	None	None	None	None	None	None	None	None	None	None	None	None	None	None	None	None	None	None	None	None	None
176.m02273	CNAG_07537	YMR097C	MTG1	SPBC25B2.04c	None	orf19.2384	ca2101	IPF9364	KOG2485	R	Conserved ATP/GTP binding protein	mitochondrial GTPase 1	Peripheral GTPase of the mitochondrial inner membrane, essential for respiratory competence, likely functions in assembly of the large ribosomal subunit, has homologs in plants and animals	mitochondrial ribosome assembly protein	unknown function	None	None	Sce_XS-up_2.0	None	None	None	None	None	None	None	None	None	None	None	None	None	None	None	None	None	None	None	None	None	None	None	None	None	None	None	None	None	None	None
176.m02277	CNAG_07533	None	None	None	None	None	None	None	None	None	None	conserved hypothetical protein	None	None	None	None	None	None	None	None	None	None	None	None	None	None	None	None	None	None	None	None	None	None	None	None	None	None	None	None	None	None	None	None	None	None	None	None	None
176.m02285	CNAG_02656	YER007C-A	TMA20	SPBC31F10.12	None	orf19.2920	ca1801	IPF11444	KOG2523	J	Predicted RNA-binding protein with PUA domain	translation machinery-associated protein 20	Protein of unknown function that associates with ribosomes and has a putative RNA binding domain; interacts with Tma22p; null mutant exhibits translation defects; has homology to human oncogene MCT-1	RNA-binding protein Tma20 (predicted)	unknown function	None	None	None	None	None	None	None	None	None	None	None	None	None	None	None	None	None	None	None	None	None	None	None	None	None	None	None	None	None	None	None	None	None	None
176.m02299	CNAG_02673	None	None	None	None	None	None	None	KOG1502	V	Flavonol reductase/cinnamoyl-CoA reductase	NAD dependent epimerase/dehydratase family protein	None	None	None	None	None	None	None	None	None	None	None	None	None	None	None	None	None	None	None	None	None	None	None	None	None	None	None	None	None	None	None	None	None	None	None	None	None
176.m02310	CNAG_02684	None	None	None	None	None	None	None	KOG0670	A	U4/U6-associated splicing factor PRP4	conserved hypothetical protein	None	None	None	None	None	None	None	None	None	None	None	None	None	None	None	None	None	None	None	None	None	None	None	None	None	None	None	None	None	None	None	None	None	None	None	None	None
176.m02311	CNAG_02685	None	None	None	None	None	None	None	KOG1437	MW	Fasciclin and related adhesion glycoproteins	conserved hypothetical protein	None	None	None	None	None	None	None	None	None	None	None	None	None	None	None	None	None	None	None	None	None	None	None	None	None	None	None	None	None	None	None	None	None	None	None	None	None
176.m02313	CNAG_02687	None	None	None	None	None	None	None	KOG3417	T	Ras1 guanine nucleotide exchange factor	conserved hypothetical protein	None	None	None	None	None	None	None	None	None	None	None	None	None	None	None	None	None	None	None	None	None	None	None	None	None	None	None	None	None	None	None	None	None	None	None	None	None
176.m02316	CNAG_02690	None	None	None	None	orf19.2467	ca2891	IFS4	None	None	None	pirin	None	None	Pirin protein (by homology)	None	None	None	None	None	None	None	None	None	None	None	None	None	None	None	None	None	None	Cal_XS-up	None	None	None	Cal_SSR.XS-up	None	None	None	None	None	Cal_XS-up_1.5	None	Cal_XS-up_2.0	None	None	None
176.m02357	CNAG_01880	None	None	None	None	None	None	None	None	None	None	conserved hypothetical protein	None	None	None	None	None	None	None	None	None	None	None	None	None	None	None	None	None	None	None	None	None	None	None	None	None	None	None	None	None	None	None	None	None	None	None	None	None
176.m02393	CNAG_01916	YDR097C	MSH6	SPCC285.16c	msh6	orf19.4945	ca3705	MSH6	KOG0217	L	Mismatch repair ATPase MSH6 (MutS family)	DNA mismatch repair protein msh6	Protein required for mismatch repair in mitosis and meiosis, forms a complex with Msh2p to repair both single-base & insertion-deletion mispairs; potentially phosphorylated by Cdc28p	MutS protein homolog	DNA mismatch repair protein by homology	None	Sce_OS-dw_2.0	None	Sce_XS-dw_2.0	None	Sce_HS-dw_2.0	None	Sce_CSR-dw_2.0	None	None	None	None	None	None	None	None	None	None	None	None	None	None	None	None	None	None	None	None	None	Cal_XS-dw_1.5	None	None	None	None
176.m02396	CNAG_01920	YLL039C	UBI4	SPBC337.08c	ubi4	orf19.6771	ca5932	UBI4	KOG0001	OR	Ubiquitin and ubiquitin-like proteins	polyubiquitin	Ubiquitin, becomes conjugated to proteins, marking them for selective degradation via the ubiquitin-26S proteasome system; essential for the cellular stress response; encoded as a polyubiquitin precursor comprised of 5 head-to-tail repeats	ubiquitin	Polyubiquitin	Sce_OS-up_2.0	None	Sce_XS-up_2.0	None	Sce_HS-up_2.0	None	Sce_CSR-up_2.0	None	None	None	Spo_XS-up_2.0	None	None	None	None	None	None	None	None	None	None	None	None	None	None	None	None	None	None	None	None	None	None	None
176.m02407	CNAG_01936	None	None	None	None	None	None	None	KOG0254	R	Predicted transporter (major facilitator superfamily)	sugar transporter	None	None	None	None	None	None	None	None	None	None	None	None	None	None	None	None	None	None	None	None	None	None	None	None	None	None	None	None	None	None	None	None	None	None	None	None	None
176.m02461	CNAG_02001	None	None	None	None	None	None	None	KOG0565	U	Inositol polyphosphate 5-phosphatase and related proteins	inositol-polyphosphate 5-phosphatase	None	None	None	None	None	None	None	None	None	None	None	None	None	None	None	None	None	None	None	None	None	None	None	None	None	None	None	None	None	None	None	None	None	None	None	None	None
176.m02465	CNAG_02005	None	None	None	None	None	None	None	KOG1999	K	RNA polymerase II transcription elongation factor DSIF/SUPT5H/SPT5	conserved hypothetical protein	None	None	None	None	None	None	None	None	None	None	None	None	None	None	None	None	None	None	None	None	None	None	None	None	None	None	None	None	None	None	None	None	None	None	None	None	None
176.m02468	CNAG_02008	None	None	None	None	None	None	None	KOG3346	R	Phosphatidylethanolamine binding protein	nuclear protein	None	None	None	None	None	None	None	None	None	None	None	None	None	None	None	None	None	None	None	None	None	None	None	None	None	None	None	None	None	None	None	None	None	None	None	None	None
176.m02472	CNAG_02012	None	None	None	None	None	None	None	KOG0134	CR	NADH:flavin oxidoreductase/12-oxophytodienoate reductase	TPR domain-containing protein	None	None	None	None	None	None	None	None	None	None	None	None	None	None	None	None	None	None	None	None	None	None	None	None	None	None	None	None	None	None	None	None	None	None	None	None	None
176.m02498	CNAG_06917	YBL064C	PRX1	None	None	orf19.5180	ca4416	IPF11888	None	None	None	thiol-specific antioxidant protein 3	Mitochondrial peroxiredoxin (1-Cys Prx) with thioredoxin peroxidase activity, has a role in reduction of hydroperoxides; induced during respiratory growth and under conditions of oxidative stress; phosphorylated	None	unknown function	Sce_OS-up_2.0	None	Sce_XS-up_2.0	None	Sce_HS-up_2.0	None	Sce_CSR-up_2.0	None	None	None	None	None	None	None	None	None	None	None	None	None	None	None	None	None	None	None	None	None	None	None	None	None	Cal_Cd-up_1.5	None
176.m02521	None	None	None	None	None	None	None	None	None	None	None	None	None	None	None	None	None	None	None	None	None	None	None	None	None	None	None	None	None	None	None	None	None	None	None	None	None	None	None	None	None	None	None	None	None	None	None	None	None
176.m02525	CNAG_07534	None	None	SPCC285.14	None	orf19.1265	ca3462	IPF14959	KOG1931	R	Putative transmembrane protein	conserved hypothetical protein	None	TRAPP complex subunit Trs130 (predicted)	similar to Saccharomyces cerevisiae Trs130p TRAPP subunit of 130 kDa involved in targeting and fusion of ER to golgi transport vesicles (by homology)	None	None	None	None	None	None	None	None	None	None	None	None	None	None	None	None	None	None	None	None	None	None	None	None	None	None	None	None	None	Cal_XS-dw_1.5	None	None	None	None
176.m02553	None	None	None	None	None	None	None	None	None	None	None	None	None	None	None	None	None	None	None	None	None	None	None	None	None	None	None	None	None	None	None	None	None	None	None	None	None	None	None	None	None	None	None	None	None	None	None	None	None
176.m02568	CNAG_01988	YIL147C	SLN1	None	None	None	None	None	KOG0519	T	Sensory transduction histidine kinase	bacteriophytochrome histidine kinase	Histidine kinase osmosensor that regulates a MAP kinase cascade; transmembrane protein with an intracellular kinase domain that signals to Ypd1p and Ssk1p, thereby forming a phosphorelay system similar to bacterial two-component regulators	None	None	None	None	None	Sce_XS-dw_2.0	None	None	None	None	None	None	None	None	None	None	None	None	None	None	None	None	None	None	None	None	None	None	None	None	None	None	None	None	None	None
176.m02573	CNAG_07556	None	None	None	None	None	None	None	KOG3736	O	Polypeptide N-acetylgalactosaminyltransferase	conserved hypothetical protein	None	None	None	None	None	None	None	None	None	None	None	None	None	None	None	None	None	None	None	None	None	None	None	None	None	None	None	None	None	None	None	None	None	None	None	None	None
176.m02583	CNAG_01969	None	None	SPAC17A5.04c	mde10	None	None	None	KOG3607	O	Meltrins, fertilins and related Zn-dependent metalloproteinases of the ADAMs family	zinc metalloprotease	None	spore wall assembly peptidase Mde10	None	None	None	None	None	None	None	None	None	None	None	None	None	None	None	None	None	None	None	None	None	None	None	None	None	None	None	None	None	None	None	None	None	None	None
176.m02584	CNAG_01980	None	None	None	None	None	None	None	None	None	None	conserved hypothetical protein	None	None	None	None	None	None	None	None	None	None	None	None	None	None	None	None	None	None	None	None	None	None	None	None	None	None	None	None	None	None	None	None	None	None	None	None	None
176.m02590	CNAG_01994	None	None	None	None	None	None	None	KOG2084	B	Predicted histone tail methylase containing SET domain	conserved hypothetical protein	None	None	None	None	None	None	None	None	None	None	None	None	None	None	None	None	None	None	None	None	None	None	None	None	None	None	None	None	None	None	None	None	None	None	None	None	None
177.m02858	CNAG_06968	None	None	None	None	None	None	None	KOG1808	R	AAA ATPase containing von Willebrand factor type A (vWA) domain	hypothetical protein	None	None	None	None	None	None	None	None	None	None	None	None	None	None	None	None	None	None	None	None	None	None	None	None	None	None	None	None	None	None	None	None	None	None	None	None	None
177.m02860	None	None	None	None	None	None	None	None	None	None	None	None	None	None	None	None	None	None	None	None	None	None	None	None	None	None	None	None	None	None	None	None	None	None	None	None	None	None	None	None	None	None	None	None	None	None	None	None	None
177.m02862	CNAG_07752	None	None	None	None	None	None	None	None	None	None	UDP-galactopyranose mutase	None	None	None	None	None	None	None	None	None	None	None	None	None	None	None	None	None	None	None	None	None	None	None	None	None	None	None	None	None	None	None	None	None	None	None	None	None
177.m02868	CNAG_03592	YOL055C	THI20	SPBP8B7.18c	None	orf19.889	ca4681	IPF3679	KOG2598	HK	Phosphomethylpyrimidine kinase	phosphomethylpyrimidine kinase	Multifunctional protein with both hydroxymethylpyrimidine kinase and thiaminase activities; involved in thiamine biosynthesis and also in thiamine degradation; member of a gene family with THI21 and THI22; functionally redundant with Thi21p	phosphomethylpyrimidine kinase (predicted)	similar to Saccharomyces cerevisiae Thi20p hydroxymethylpyrimidine phosphate (HMP-P) kinase (by homology)	None	None	None	None	Sce_HS-up_2.0	Sce_HS-dw_2.0	None	None	None	None	None	None	None	None	None	None	None	None	None	None	None	None	None	None	None	None	None	None	None	None	None	None	None	None
177.m02875	CNAG_03585	None	None	SPAC25H1.02	jmj1	None	None	None	KOG2131	BT	Uncharacterized conserved protein, contains JmjC domain	JmjC domain-containing protein 4	None	Jmj1 protein	None	None	None	None	None	None	None	None	None	Spo_OS-up_2.0	None	Spo_XS-up_2.0	None	Spo_Cd-up_2.0	None	Spo_CESR-up	None	None	None	None	None	None	None	None	None	None	None	None	None	None	None	None	None	None	None
177.m02886	CNAG_03573	None	None	None	None	None	None	None	KOG2614	CR	Kynurenine 3-monooxygenase and related flavoprotein monooxygenases	kynurenine 3-monooxygenase	None	None	None	None	None	None	None	None	None	None	None	None	None	None	None	None	None	None	None	None	None	None	None	None	None	None	None	None	None	None	None	None	None	None	None	None	None
177.m02887	CNAG_03572	None	None	None	None	None	None	None	None	None	None	opsin 1	None	None	None	None	None	None	None	None	None	None	None	None	None	None	None	None	None	None	None	None	None	None	None	None	None	None	None	None	None	None	None	None	None	None	None	None	None
177.m02907	CNAG_03541	YHR076W	PTC7	SPAC1556.03	azr1	orf19.5661	ca4370	IPF5279	KOG1379	T	Serine/threonine protein phosphatase	conserved hypothetical protein	Mitochondrially localized type 2C protein phosphatase; expression induced by growth on ethanol and by sustained osmotic stress; possible role in carbon source utilization in low oxygen environments	serine/threonine protein phosphatase Azr1	unknown function	None	None	None	None	None	None	None	None	None	None	None	None	None	None	None	None	None	None	None	None	None	None	None	None	None	None	None	None	None	None	None	None	None	None
177.m02914	CNAG_03533	YER051W	JHD1	SPCC622.16c	epe1	orf19.3281	ca5469	IPF298	KOG1633	B	F-box protein JEMMA and related proteins with JmjC, PHD, F-box and LRR domains	JmjC domain-containing histone demethylation protein 1	JmjC domain family histone demethylase specific for H3-K36, similar to proteins found in human, mouse, drosophila, X. laevis, C. elegans, and S. pombe	Jmjc domain chromatin associated protein Epe1	unknown function	None	None	None	None	None	None	None	None	None	None	None	None	None	None	None	None	None	None	None	None	None	None	None	None	None	None	None	None	Cal_XS-up_1.5	None	None	None	None	None
177.m02950	CNAG_03492	None	None	None	None	None	None	None	KOG1217	T	Fibrillins and related proteins containing Ca2+-binding EGF-like domains	conserved hypothetical protein	None	None	None	None	None	None	None	None	None	None	None	None	None	None	None	None	None	None	None	None	None	None	None	None	None	None	None	None	None	None	None	None	None	None	None	None	None
177.m02979	CNAG_03459	YDL143W	CCT4	SPBC106.06	cct4	orf19.2720	ca1273	CCT4	KOG0358	O	Chaperonin complex component, TCP-1 delta subunit (CCT4)	t-complex protein 1	Subunit of the cytosolic chaperonin Cct ring complex, related to Tcp1p, required for the assembly of actin and tubulins in vivo	chaperonin-containing T-complex delta subunit Cct4	Component of chaperonin-containing T-complex	None	None	None	None	None	None	None	None	None	None	None	None	None	None	None	None	None	None	None	None	None	None	None	None	None	None	None	None	None	Cal_XS-dw_1.5	None	None	None	None
177.m02982	CNAG_03456	None	None	SPCC1393.09c	None	None	None	None	KOG4018	S	Uncharacterized conserved protein, contains RWD domain	conserved hypothetical protein	None	RWD domain	None	None	None	None	None	None	None	None	None	None	None	None	None	None	None	None	None	None	None	None	None	None	None	None	None	None	None	None	None	None	None	None	None	None	None
177.m02985	CNAG_03452	YEL052W	AFG1	SPBC115.02c	None	orf19.2891	ca3775	AFG1	KOG2383	R	Predicted ATPase	AFG1 family mitochondrial ATPase	Conserved protein that may act as a chaperone in the degradation of misfolded or unassembled cytochrome c oxidase subunits; localized to matrix face of the mitochondrial inner membrane; member of the AAA family but lacks a protease domain	AFG1 family mitochondrial ATPase	ATPase family gene (by homology)	None	None	None	None	None	None	None	None	None	None	None	None	None	None	None	None	None	None	None	None	None	None	None	None	None	None	None	None	None	None	None	None	None	None
177.m03025	CNAG_03408	None	None	None	None	None	None	None	KOG1808	R	AAA ATPase containing von Willebrand factor type A (vWA) domain	conserved hypothetical protein	None	None	None	None	None	None	None	None	None	None	None	None	None	None	None	None	None	None	None	None	None	None	None	None	None	None	None	None	None	None	None	None	None	None	None	None	None
177.m03047	CNAG_03385	YDL127W	PCL2	None	None	orf19.2649	ca0384	PCL1	KOG1674	R	Cyclin	g1/s-specific cyclin pcl1	G1 cyclin, associates with Pho85p cyclin-dependent kinase (Cdk) to contribute to entry into the mitotic cell cycle, essential for cell morphogenesis; localizes to sites of polarized cell growth	None	cyclin, G1/S-specific (by homology)	None	None	None	None	None	None	None	None	None	None	None	None	None	None	None	None	None	None	None	None	None	None	None	None	None	None	None	None	None	None	None	None	None	None
177.m03088	CNAG_03332	YOL094C	RFC4	SPAC1687.03c	rfc4	orf19.7658	ca6043	RFC4	KOG0991	L	Replication factor C, subunit RFC2	activator 1 40 kDa subunit	Subunit of heteropentameric Replication factor C (RF-C), which is a DNA binding protein and ATPase that acts as a clamp loader of the proliferating cell nuclear antigen (PCNA) processivity factor for DNA polymerases delta and epsilon	DNA replication factor C complex subunit Rfc4 (predicted)	DNA replication factor C (by homology)	None	None	None	None	None	Sce_HS-dw_2.0	None	None	None	None	None	None	None	None	None	None	None	None	None	None	None	None	None	None	None	None	None	None	None	None	None	None	None	None
177.m03097	CNAG_03322	None	None	SPBPB2B2.11	None	orf19.3674	ca4043	IPF5291	KOG1429	GM	dTDP-glucose 4-6-dehydratase/UDP-glucuronic acid decarboxylase	UDP-xylose synthase	None	nucleotide-sugar 4,6-dehydratase (predicted)	UDP-glucose 4-epimerase (by homology)	None	None	None	None	None	None	None	None	None	None	Spo_XS-up_2.0	None	None	None	None	None	None	None	None	None	None	None	None	None	None	None	None	None	None	None	None	None	None	None
177.m03105	CNAG_03314	YDR374C	None	None	None	orf19.1939	ca3359	IPF9566	KOG1901	R	Uncharacterized high-glucose-regulated protein	YTH domain family 2	None	None	unknown function	Sce_OS-up_2.0	None	Sce_XS-up_2.0	None	Sce_HS-up_2.0	None	Sce_CSR-up_2.0	None	None	None	None	None	None	None	None	None	None	None	None	None	None	None	None	None	None	None	None	None	None	None	None	None	None	None
177.m03129	CNAG_03286	YOR016C	ERP4	SPAC17A5.08	None	orf19.3558	ca0581	IPF3181	KOG1693	U	emp24/gp25L/p24 family of membrane trafficking proteins	erp2,4	Protein with similarity to Emp24p and Erv25p, member of the p24 family involved in ER to Golgi transport	COPII-coated vesicle component Erp2/3/4 (predicted)	similar to Saccharomyces cerevisiae Erp3p p24 protein involved in membrane trafficking (by homology)	None	None	None	None	None	None	None	None	None	None	None	None	None	None	None	None	None	None	None	None	None	None	None	None	None	None	None	None	None	Cal_XS-dw_1.5	None	None	None	None
177.m03164	CNAG_03248	YOR134W	BAG7	SPBC17F3.01c	rga5	orf19.7115	ca5584	SAC7	KOG2710	TZ	Rho GTPase-activating protein	rho GTPase activator	Rho GTPase activating protein (RhoGAP), stimulates the intrinsic GTPase activity of Rho1p, which plays a role in actin cytoskeleton organization and control of cell wall synthesis; structurally and functionally related to Sac7p	GTPase activating protein Rga5	GAP for RHO1 by homology	Sce_OS-up_2.0	None	Sce_XS-up_2.0	None	Sce_HS-up_2.0	None	Sce_CSR-up_2.0	None	None	None	None	None	None	None	None	None	None	None	None	None	None	Cal_HS-dw	None	Cal_SSR.HS-dw	None	None	None	None	None	None	None	None	None	None
177.m03188	CNAG_03226	YLL041C	SDH2	SPAC140.01	sdh2	orf19.637	ca1845	IPF11123	KOG3049	C	Succinate dehydrogenase, Fe-S protein subunit	succinate dehydrogenase iron-sulfur subunit	Iron-sulfur protein subunit of succinate dehydrogenase (Sdh1p, Sdh2p, Sdh3p, Sdh4p), which couples the oxidation of succinate to the transfer of electrons to ubiquinone	succinate dehydrogenase (ubiquinone) iron-sulfur protein subunit	similar to Saccharomyces cerevisiae Sdh2p succinate dehydrogenase iron-sulfur protein subunit (by homology)	None	None	None	None	Sce_HS-up_2.0	None	None	None	None	None	None	Spo_XS-dw_2.0	None	None	None	None	None	None	None	None	None	None	None	None	None	None	None	None	None	None	None	None	None	None
177.m03190	CNAG_03223	None	None	SPCC1322.10	None	None	None	None	None	None	None	hypothetical protein	None	conserved fungal protein	None	None	None	None	None	None	None	None	None	None	None	None	None	None	None	None	None	None	None	None	None	None	None	None	None	None	None	None	None	None	None	None	None	None	None
177.m03194	CNAG_07719	YKL145W	RPT1	SPBC16C6.07c	rpt1	orf19.441	ca4064	RPT1	KOG0729	O	26S proteasome regulatory complex, ATPase RPT1	endopeptidase	One of six ATPases of the 19S regulatory particle of the 26S proteasome involved in the degradation of ubiquitinated substrates; required for optimal CDC20 transcription; interacts with Rpn12p and the E3 ubiquitin-protein ligase Ubr1p	19S proteasome regulatory subunit Rpt1 (predicted)	26S PROTEASE REGULATORY SUBUNIT 7 (by homology)	None	None	None	None	None	None	None	None	None	None	None	None	None	None	None	None	None	None	None	None	None	None	None	None	None	None	None	None	None	None	None	None	None	None
177.m03200	CNAG_03213	None	None	SPBC19C7.09c	uve1	None	None	None	None	None	None	UV-endonuclease UVE-1	None	endonuclease Uve1	None	None	None	None	None	None	None	None	None	None	None	Spo_XS-up_2.0	None	None	None	None	None	None	None	None	None	None	None	None	None	None	None	None	None	None	None	None	None	None	None
177.m03215	CNAG_03191	YGL003C	CDH1	SPAC144.13c	srw1	orf19.2084	ca4815	CDH1	KOG0305	DO	Anaphase promoting complex, Cdc20, Cdh1, and Ama1 subunits	FZR1 protein	Cell-cycle regulated activator of the anaphase-promoting complex/cyclosome (APC/C), which directs ubiquitination of cyclins resulting in mitotic exit; targets the APC/C to specific substrates including CDC20, ASE1, CIN8 and FIN1	CDK inhibitor Srw1	Substrate-specific activator of APC-dependent proteolysis (by homology)	None	None	None	None	None	None	None	None	None	None	None	None	None	None	None	None	None	None	None	None	None	None	None	None	None	None	None	None	None	None	None	None	None	None
177.m03217	CNAG_03189	YPR089W	None	SPAC25B8.08	None	orf19.757	ca0049	IPF3908	None	None	None	DIL and Ankyrin domain-containing protein	None	conserved fungal family	unknown function	None	None	None	None	None	None	None	None	None	None	Spo_XS-up_2.0	None	None	None	None	None	None	None	None	None	None	None	None	None	None	None	None	None	None	Cal_XS-dw_1.5	None	None	None	None
177.m03226	CNAG_07715	None	None	None	None	None	None	None	KOG1142	K	Transcription initiation factor TFIID, subunit TAF12 (also component of histone acetyltransferase SAGA)	conserved hypothetical protein	None	None	None	None	None	None	None	None	None	None	None	None	None	None	None	None	None	None	None	None	None	None	None	None	None	None	None	None	None	None	None	None	None	None	None	None	None
177.m03234	CNAG_03172	None	None	None	None	None	None	None	None	None	None	conserved hypothetical protein	None	None	None	None	None	None	None	None	None	None	None	None	None	None	None	None	None	None	None	None	None	None	None	None	None	None	None	None	None	None	None	None	None	None	None	None	None
177.m03236	CNAG_03170	None	None	None	None	None	None	None	KOG2683	BK	Sirtuin 4 and related class II sirtuins (SIR2 family)	conserved hypothetical protein	None	None	None	None	None	None	None	None	None	None	None	None	None	None	None	None	None	None	None	None	None	None	None	None	None	None	None	None	None	None	None	None	None	None	None	None	None
177.m03264	CNAG_03143	YFL014W	HSP12	None	None	orf19.3160	ca0627	HSP12	None	None	None	conserved hypothetical protein	Plasma membrane localized protein that protects membranes from desiccation; induced by heat shock, oxidative stress, osmostress, stationary phase entry, glucose depletion, oleate and alcohol; regulated by the HOG and Ras-Pka pathways	None	Heat shock protein (by homology)	Sce_OS-up_2.0	None	Sce_XS-up_2.0	None	Sce_HS-up_2.0	None	Sce_CSR-up_2.0	None	None	None	None	None	None	None	None	None	None	None	None	None	None	None	None	None	Cal_OS-up_1.5	None	Cal_OS-up_2.0	None	None	None	None	None	Cal_Cd-up_1.5	None
177.m03265	CNAG_03142	None	None	None	None	None	None	None	None	None	None	conserved hypothetical protein	None	None	None	None	None	None	None	None	None	None	None	None	None	None	None	None	None	None	None	None	None	None	None	None	None	None	None	None	None	None	None	None	None	None	None	None	None
177.m03274	CNAG_07712	YPL015C	HST2	SPCC132.02	hst2	orf19.2580	ca2686	HST2	KOG2682	BK	NAD-dependent histone deacetylases and class I sirtuins (SIR2 family)	NAD-dependent histone deacetylase	Cytoplasmic member of the silencing information regulator 2 (Sir2) family of NAD(+)-dependent protein deacetylases; modulates nucleolar (rDNA) and telomeric silencing; possesses NAD(+)-dependent histone deacetylase activity in vitro	Sir2 family histone deacetylase Hst2	Transcription regulatory protein	None	None	None	None	None	None	None	None	None	None	None	None	None	None	None	None	None	None	None	None	None	None	None	None	None	None	None	None	None	None	None	None	None	None
177.m03275	CNAG_03130	None	None	None	None	None	None	None	KOG0393	R	Ras-related small GTPase, Rho type	signal transducer	None	None	None	None	None	None	None	None	None	None	None	None	None	None	None	None	None	None	None	None	None	None	None	None	None	None	None	None	None	None	None	None	None	None	None	None	None
177.m03280	CNAG_03124	YCR057C	PWP2	SPBC713.04c	None	orf19.3276	ca5466	PWP2	KOG0291	A	WD40-repeat-containing subunit of the 18S rRNA processing complex	WD repeat protein	Conserved 90S pre-ribosomal component essential for proper endonucleolytic cleavage of the 35 S rRNA precursor at A0, A1, and A2 sites; contains eight WD-repeats; PWP2 deletion leads to defects in cell cycle and bud morphogenesis	U3 snoRNP-associated protein Utp1	periodic tryptophan protein (by homology)	None	None	None	Sce_XS-dw_2.0	None	Sce_HS-dw_2.0	None	None	None	None	None	None	None	None	None	None	None	Cal_OS-dw	None	None	None	Cal_HS-dw	None	None	None	Cal_OS-dw_1.5	None	Cal_OS-dw_2.0	None	Cal_XS-dw_1.5	None	None	None	Cal_Cd-dw_1.5
177.m03281	CNAG_03123	None	None	None	None	None	None	None	None	None	None	conserved hypothetical protein	None	None	None	None	None	None	None	None	None	None	None	None	None	None	None	None	None	None	None	None	None	None	None	None	None	None	None	None	None	None	None	None	None	None	None	None	None
177.m03285	CNAG_03118	None	None	None	None	None	None	None	KOG1994	A	Predicted RNA binding protein, contains G-patch and Zn-finger domains	conserved hypothetical protein	None	None	None	None	None	None	None	None	None	None	None	None	None	None	None	None	None	None	None	None	None	None	None	None	None	None	None	None	None	None	None	None	None	None	None	None	None
177.m03302	CNAG_03099	None	None	None	None	None	None	None	KOG2571	M	Chitin synthase/hyaluronan synthase (glycosyltransferases)	chitin synthase 1	None	None	None	None	None	None	None	None	None	None	None	None	None	None	None	None	None	None	None	None	None	None	None	None	None	None	None	None	None	None	None	None	None	None	None	None	None
177.m03311	CNAG_03566	None	None	None	None	None	None	None	None	None	None	conserved hypothetical protein	None	None	None	None	None	None	None	None	None	None	None	None	None	None	None	None	None	None	None	None	None	None	None	None	None	None	None	None	None	None	None	None	None	None	None	None	None
177.m03313	CNAG_07745	YMR083W	ADH3	None	None	orf19.3997	ca4765	ADH1	KOG0023	Q	Alcohol dehydrogenase, class V	mannitol-1-phosphate dehydrogenase	Mitochondrial alcohol dehydrogenase isozyme III; involved in the shuttling of mitochondrial NADH to the cytosol under anaerobic conditions and ethanol production	None	alcohol dehydrogenase (by homology)	None	None	None	None	None	None	None	None	None	None	None	None	None	None	None	None	None	None	None	Cal_XS-dw	None	None	None	Cal_SSR.XS-dw	None	None	None	None	None	None	None	None	None	None
177.m03314	CNAG_03529	None	None	None	None	None	None	None	None	None	None	conserved hypothetical protein	None	None	None	None	None	None	None	None	None	None	None	None	None	None	None	None	None	None	None	None	None	None	None	None	None	None	None	None	None	None	None	None	None	None	None	None	None
177.m03316	CNAG_03493	None	None	SPBC106.11c	plg7	None	None	None	KOG3847	I	Phospholipase A2 (platelet-activating factor acetylhydrolase in humans)	platelet-activating factor acetylhydrolase	None	phospholipase A2 (predicted)	None	None	None	None	None	None	None	None	None	None	None	Spo_XS-up_2.0	None	Spo_Cd-up_2.0	None	None	None	None	None	None	None	None	None	None	None	None	None	None	None	None	None	None	None	None	None
177.m03363	CNAG_03566	None	None	None	None	None	None	None	None	None	None	conserved hypothetical protein	None	None	None	None	None	None	None	None	None	None	None	None	None	None	None	None	None	None	None	None	None	None	None	None	None	None	None	None	None	None	None	None	None	None	None	None	None
177.m03373	CNAG_03544	None	None	None	None	orf19.6607	ca3847	IPF7942	None	None	None	conserved hypothetical protein	None	None	NADH-ubiquinone oxidoreductase	None	None	None	None	None	None	None	None	None	None	None	None	None	None	None	None	None	None	None	None	None	None	None	None	None	None	None	None	None	None	None	None	None	None
177.m03377	CNAG_03520	None	None	SPAC9G1.08c	None	None	None	None	KOG2112	I	Lysophospholipase	conserved hypothetical protein	None	phospholipase (predicted)	None	None	None	None	None	None	None	None	None	None	None	None	None	None	None	None	None	None	None	None	None	None	None	None	None	None	None	None	None	None	None	None	None	None	None
177.m03381	CNAG_03463	YPL004C	LSP1	None	None	orf19.3149	ca0622	IPF14171	None	None	None	conserved hypothetical protein	Primary component of eisosomes, which are large immobile patch structures at the cell cortex associated with endocytosis, along with Pil1p and Sur7p; null mutants show activation of Pkc1p/Ypk1p stress resistance pathways	None	unknown function	None	None	Sce_XS-up_2.0	None	Sce_HS-up_2.0	None	None	None	None	None	None	None	None	None	None	None	None	None	None	None	None	None	None	None	None	None	None	None	None	None	None	None	None	None
177.m03384	CNAG_03445	None	None	None	None	None	None	None	KOG2301	PT	Voltage-gated Ca2+ channels, alpha1 subunits	conserved hypothetical protein	None	None	None	None	None	None	None	None	None	None	None	None	None	None	None	None	None	None	None	None	None	None	None	None	None	None	None	None	None	None	None	None	None	None	None	None	None
177.m03402	CNAG_03353	YBR146W	MRPS9	SPAC29A4.03c	None	orf19.5230	ca1109	MRPS9	KOG1697	J	Mitochondrial/chloroplast ribosomal protein S9	conserved hypothetical protein	Mitochondrial ribosomal protein of the small subunit	mitochondrial ribosomal protein subunit S9	ribosomal protein S9 small subunit precursor	None	None	None	None	None	None	None	None	None	None	None	None	None	None	None	None	None	None	None	None	None	None	None	None	None	None	None	None	None	None	None	None	None	None
177.m03452	CNAG_07720	YKR065C	PAM17	SPAC167.04	pam17	orf19.240	ca1265	IPF10510	None	None	None	presequence translocated-associated motor subunit PAM17	Presequence translocase-associated motor subunit, required for stable complex formation between cochaperones Pam16p and Pam18p, promotes association of Pam16p-Pam18p with the presequence translocase	TIM23 translocase complex-associated motor subunit Pam17 (predicted)	unknown function	None	None	None	None	None	None	None	None	None	None	None	None	None	None	None	None	None	None	None	None	None	None	None	None	None	None	None	None	None	None	None	None	None	None
177.m03471	CNAG_03315	YPR165W	RHO1	SPAC1F7.04	rho1	orf19.2843	ca2866	RHO1	KOG0393	R	Ras-related small GTPase, Rho type	Rho1 GTP-binding protein	GTP-binding protein of the rho subfamily of Ras-like proteins, involved in establishment of cell polarity; regulates protein kinase C (Pkc1p) and the cell wall synthesizing enzyme 1,3-beta-glucan synthase (Fks1p and Gsc2p)	Rho family GTPase Rho1	GTP-binding protein of the rho subfamily of ras-like proteins (by homology)	None	None	None	None	None	None	None	None	None	None	None	None	None	None	None	None	None	None	None	Cal_XS-dw	None	None	None	Cal_SSR.XS-dw	None	None	None	None	None	Cal_XS-dw_1.5	None	None	None	None
177.m03476	CNAG_03347	YDR258C	HSP78	SPBC4F6.17c	None	None	None	None	KOG1051	O	Chaperone HSP104 and related ATP-dependent Clp proteases	chaperone	Oligomeric mitochondrial matrix chaperone that cooperates with Ssc1p in mitochondrial thermotolerance after heat shock; prevents the aggregation of misfolded matrix proteins; component of the mitochondrial proteolysis system	mitochondrial heatshock protein Hsp78 (predicted)	None	Sce_OS-up_2.0	None	None	None	Sce_HS-up_2.0	None	None	None	None	None	None	Spo_XS-dw_2.0	Spo_Cd-up_2.0	None	None	None	None	None	None	None	None	None	None	None	None	None	None	None	None	None	None	None	None	None
179.m00002	CNAG_00012	None	None	None	None	orf19.2036	ca3645	IPF4127	KOG2741	GQ	Dimeric dihydrodiol dehydrogenase	conserved hypothetical protein	None	None	putative dimeric dihydrodiol dehydrogenase (by homology)	None	None	None	None	None	None	None	None	None	None	None	None	None	None	None	None	None	None	None	None	None	None	None	None	None	None	None	None	None	None	None	None	None	None
179.m00004	CNAG_06983	None	None	None	None	None	None	None	KOG1865	O	Ubiquitin carboxyl-terminal hydrolase	conserved hypothetical protein	None	None	None	None	None	None	None	None	None	None	None	None	None	None	None	None	None	None	None	None	None	None	None	None	None	None	None	None	None	None	None	None	None	None	None	None	None
179.m00006	CNAG_06963	None	None	None	None	None	None	None	KOG0254	R	Predicted transporter (major facilitator superfamily)	sugar transporter	None	None	None	None	None	None	None	None	None	None	None	None	None	None	None	None	None	None	None	None	None	None	None	None	None	None	None	None	None	None	None	None	None	None	None	None	None
179.m00015	CNAG_03078	YCR026C	NPP1	SPBC725.05c	None	orf19.4409	ca1455	IPF15081	KOG2645	R	Type I phosphodiesterase/nucleotide pyrophosphatase	type I phosphodiesterase/nucleotide pyrophosphatase family protein	Nucleotide pyrophosphatase/phosphodiesterase family member; mediates extracellular nucleotide phosphate hydrolysis along with Npp2p and Pho5p; activity and expression enhanced during conditions of phosphate starvation	nucleotide pyrophosphatase (predicted)	phophodiesterase (by homology)	None	None	None	None	None	None	None	None	None	None	None	None	None	None	None	None	None	None	None	None	None	None	None	None	None	None	None	None	None	None	None	None	None	None
179.m00038	CNAG_03049	YDR510W	SMT3	SPBC365.06	pmt3	orf19.670	ca4105	SMT3	KOG1769	O	Ubiquitin-like proteins	predicted protein	Ubiquitin-like protein of the SUMO family, conjugated to lysine residues of target proteins; regulates chromatid cohesion, chromosome segregation, APC-mediated proteolysis, DNA replication and septin ring dynamics	SUMO	Ubiquitin-like protein (by homology)	None	None	None	None	None	None	None	None	None	None	None	None	None	None	None	None	None	None	None	None	None	None	None	None	None	None	None	None	None	None	None	None	None	None
179.m00059	CNAG_03022	None	None	SPCC777.05	gtr2	None	None	None	KOG3887	U	Predicted small GTPase involved in nuclear protein import	conserved hypothetical protein	None	Gtr1/RagA G protein Gtr2	None	None	None	None	None	None	None	None	None	None	None	None	None	None	None	None	None	None	None	None	None	None	None	None	None	None	None	None	None	None	None	None	None	None	None
179.m00068	CNAG_03012	None	None	None	None	None	None	None	None	None	None	hypothetical protein	None	None	None	None	None	None	None	None	None	None	None	None	None	None	None	None	None	None	None	None	None	None	None	None	None	None	None	None	None	None	None	None	None	None	None	None	None
179.m00069	CNAG_03012	None	None	None	None	None	None	None	None	None	None	hypothetical protein	None	None	None	None	None	None	None	None	None	None	None	None	None	None	None	None	None	None	None	None	None	None	None	None	None	None	None	None	None	None	None	None	None	None	None	None	None
179.m00070	CNAG_03012	None	None	None	None	None	None	None	None	None	None	hypothetical protein	None	None	None	None	None	None	None	None	None	None	None	None	None	None	None	None	None	None	None	None	None	None	None	None	None	None	None	None	None	None	None	None	None	None	None	None	None
179.m00093	CNAG_01583	YLR025W	SNF7	SPAC1142.07c	vps32	orf19.6040	ca4903	SNF7	KOG1656	U	Protein involved in glucose derepression and pre-vacuolar endosome protein sorting	vacuolar-sorting protein SNF7	One of four subunits of the endosomal sorting complex required for transport III (ESCRT-III); involved in the sorting of transmembrane proteins into the multivesicular body (MVB) pathway; recruited from the cytoplasm to endosomal membranes	vacuolar sorting protein Vps32	Class E Vps protein (by homology)	None	None	None	None	None	None	None	None	None	None	None	None	None	None	None	None	None	None	None	None	None	None	None	None	None	None	None	None	None	None	None	None	None	None
179.m00098	CNAG_01588	YDR276C	PMP3	SPBC713.11c	pmp3	orf19.2959.1	ca4174	IPF4430	KOG1773	R	Stress responsive protein	hypothetical protein	Small plasma membrane protein related to a family of plant polypeptides that are overexpressed under high salt concentration or low temperature, not essential for viability, deletion causes hyperpolarization of the plasma membrane potential	plasma membrane proteolipid Pmp3	unknown function	None	None	None	None	None	None	None	None	Spo_OS-up_2.0	None	Spo_XS-up_2.0	None	None	None	None	None	None	None	None	None	None	None	None	None	Cal_OS-up_1.5	None	None	None	None	None	None	None	None	None
179.m00102	CNAG_01594	YMR189W	GCV2	SPAC13G6.06c	gcv2	orf19.385	ca3883	GCV2	KOG2040	E	Glycine dehydrogenase (decarboxylating)	glycine dehydrogenase	P subunit of the mitochondrial glycine decarboxylase complex, required for the catabolism of glycine to 5,10-methylene-THF; expression is regulated by levels of 5,10-methylene-THF in the cytoplasm	glycine cleavage complex subunit P (predicted)	Glycine decarboxylase P subunit	None	None	Sce_XS-up_2.0	None	Sce_HS-up_2.0	None	None	None	None	None	None	None	None	None	None	None	None	None	None	None	None	None	None	None	None	Cal_OS-dw_1.5	None	Cal_OS-dw_2.0	None	Cal_XS-dw_1.5	None	Cal_XS-dw_2.0	None	None
179.m00123	CNAG_01621	None	None	None	None	None	None	None	None	None	None	conserved hypothetical protein	None	None	None	None	None	None	None	None	None	None	None	None	None	None	None	None	None	None	None	None	None	None	None	None	None	None	None	None	None	None	None	None	None	None	None	None	None
179.m00131	CNAG_01630	YNL317W	PFS2	SPAC12G12.14c	pfs2	orf19.2307	ca3310	PFS2	KOG0284	A	Polyadenylation factor I complex, subunit PFS2	polyadenylation factor subunit 2	Integral subunit of the pre-mRNA cleavage and polyadenylation factor (CPF) complex; plays an essential role in mRNA 3'-end formation by bridging different processing factors and thereby promoting the assembly of the processing complex	WD repeat protein Pfs2	Polyadenylation Factor I subunit (by homology)	None	None	None	None	None	None	None	None	None	None	None	None	None	None	None	None	None	None	None	None	None	None	None	None	None	None	None	None	Cal_XS-up_1.5	None	None	None	None	None
179.m00142	CNAG_01642	YCR092C	MSH3	SPAC8F11.03	msh3	orf19.3608	ca1127	MSH3	KOG0218	L	Mismatch repair MSH3	DNA mismatch repair protein Msh3	Mismatch repair protein, forms dimers with Msh2p that mediate repair of insertion or deletion mutations and removal of nonhomologous DNA ends, contains a PCNA (Pol30p) binding motif required for genome stability	MutS protein homolog 3	DNA mismatch repair by homology	None	None	None	None	None	None	None	None	None	None	None	None	None	None	None	None	None	None	None	None	None	None	None	None	None	None	None	None	None	Cal_XS-dw_1.5	None	None	None	None
179.m00158	CNAG_07595	None	None	None	None	None	None	None	KOG0516	Z	Dystonin, GAS (Growth-arrest-specific protein), and related proteins	conserved hypothetical protein	None	None	None	None	None	None	None	None	None	None	None	None	None	None	None	None	None	None	None	None	None	None	None	None	None	None	None	None	None	None	None	None	None	None	None	None	None
179.m00160	CNAG_01664	YBR160W	CDC28	SPBC11B10.09	cdc2	orf19.3856	ca3095	CDC28	KOG0594	R	Protein kinase PCTAIRE and related kinases	CMGC/CDK/CDC2 protein kinase	Catalytic subunit of the main cell cycle cyclin-dependent kinase (CDK); alternately associates with G1 cyclins (CLNs) and G2/M cyclins (CLBs) which direct the CDK to specific substrates	cyclin-dependent protein kinase Cdc2	CELL DIVISION CONTROL PROTEIN 28 -protein kinase	Sce_OS-up_2.0	None	None	Sce_XS-dw_2.0	None	None	None	None	None	None	None	None	None	None	None	None	None	None	None	None	None	None	None	None	None	None	None	None	None	None	None	None	None	None
179.m00169	CNAG_01674	None	None	None	None	None	None	None	KOG2533	G	Permease of the major facilitator superfamily	MFS transporter	None	None	None	None	None	None	None	None	None	None	None	None	None	None	None	None	None	None	None	None	None	None	None	None	None	None	None	None	None	None	None	None	None	None	None	None	None
179.m00220	CNAG_01735	None	None	None	None	None	None	None	KOG0053	E	Cystathionine beta-lyases/cystathionine gamma-synthases	conserved hypothetical protein	None	None	None	None	None	None	None	None	None	None	None	None	None	None	None	None	None	None	None	None	None	None	None	None	None	None	None	None	None	None	None	None	None	None	None	None	None
179.m00228	CNAG_01745	None	None	None	None	None	None	None	KOG2711	C	Glycerol-3-phosphate dehydrogenase/dihydroxyacetone 3-phosphate reductase	sn-glycerol-3-phosphate dehydrogenase NAD	None	None	None	None	None	None	None	None	None	None	None	None	None	None	None	None	None	None	None	None	None	None	None	None	None	None	None	None	None	None	None	None	None	None	None	None	None
179.m00233	CNAG_01752	YOR222W	ODC2	SPAC328.09	None	orf19.3518	ca0807	IPF12564	KOG0754	C	Mitochondrial oxodicarboxylate carrier protein	organic acid transporter	Mitochondrial inner membrane transporter, exports 2-oxoadipate and 2-oxoglutarate from the mitochondrial matrix to the cytosol for use in lysine and glutamate biosynthesis and in lysine catabolism	2-oxoadipate and 2-oxoglutarate transporter (predicted)	ADP/ATP carrier proteins (by homology)	None	None	None	None	None	Sce_HS-dw_2.0	None	None	None	None	Spo_XS-up_2.0	None	None	None	None	None	None	None	None	None	None	None	None	None	None	None	None	None	None	None	None	None	None	None
179.m00262	CNAG_01796	None	None	None	None	None	None	None	KOG2210	T	Oxysterol-binding protein	conserved hypothetical protein	None	None	None	None	None	None	None	None	None	None	None	None	None	None	None	None	None	None	None	None	None	None	None	None	None	None	None	None	None	None	None	None	None	None	None	None	None
179.m00273	CNAG_01817	YDR292C	SRP101	SPBC3B9.03	None	orf19.3952	ca1011	SRP101	KOG0781	U	Signal recognition particle receptor, alpha subunit	signal recognition particle binding protein	Signal recognition particle (SRP) receptor - alpha subunit; contain GTPase domains; involved in SRP-dependent protein targeting; interacts with SRP102p	signal recognition particle receptor alpha subunit Srp101	signal recognition particle receptor, alpha chain (by homology)	None	None	None	None	None	None	None	None	None	None	None	None	None	None	None	None	None	None	None	None	None	None	None	None	None	None	None	None	None	None	None	None	None	None
179.m00275	CNAG_01819	YDR116C	MRPL1	SPAC1610.02c	None	orf19.5698	ca2613	IPF5446	None	None	None	ribosomal protein L1	Mitochondrial ribosomal protein of the large subunit	mitochondrial ribosomal protein subunit L1	putative ribosomal protein (by homology)	None	None	None	None	None	None	None	None	None	None	None	None	None	None	None	None	None	None	None	None	None	None	None	None	None	None	None	None	None	None	None	None	None	None
179.m00295	CNAG_01850	None	None	SPAC27E2.09	mak2	orf19.5181	ca0108	HIK1	KOG0519	T	Sensory transduction histidine kinase	protein-histidine kinase	None	histidine kinase Mak2	histidine kinase	None	None	None	None	None	None	None	None	None	None	None	None	None	None	None	None	None	None	None	None	None	None	None	None	None	None	None	None	None	None	None	None	None	None
179.m00298	CNAG_01854	None	None	None	None	None	None	None	KOG3544	W	Collagens (type IV and type XIII), and related proteins	heparinase II/III family protein	None	None	None	None	None	None	None	None	None	None	None	None	None	None	None	None	None	None	None	None	None	None	None	None	None	None	None	None	None	None	None	None	None	None	None	None	None
179.m00302	CNAG_02714	YAL003W	EFB1	SPCC1450.04	tef5	orf19.3838	ca4862	EFB1	KOG1668	K	Elongation factor 1 beta/delta chain	elongation factor 1-beta	Translation elongation factor 1 beta; stimulates nucleotide exchange to regenerate EF-1 alpha-GTP for the next elongation cycle; part of the EF-1 complex, which facilitates binding of aminoacyl-tRNA to the ribosomal A site	translation elongation factor EF-1 beta subunit (eEF1B)	translation elongation factor eEF1beta	None	Sce_OS-dw_2.0	None	Sce_XS-dw_2.0	None	None	None	None	None	None	None	Spo_XS-dw_2.0	None	Spo_Cd-dw_2.0	None	Spo_CESR-dw	None	None	None	Cal_XS-dw	None	None	None	Cal_SSR.XS-dw	None	None	None	None	None	None	None	None	None	None
179.m00319	CNAG_02741	YKL134C	^OCT1	SPAC1F3.10c	40087	orf19.1195	ca1374	MIP1	KOG2090	O	Metalloendopeptidase family - mitochondrial intermediate peptidase	mitochondrial intermediate peptidase	Mitochondrial intermediate peptidase, cleaves N-terminal residues of a subset of proteins upon import, after their cleavage by mitochondrial processing peptidase (Mas1p-Mas2p); may contribute to mitochondrial iron homeostasis	mitochondrial intermediate peptidase Oct1 (predicted)	Mitochondrial intermediate peptidase (by homology)	Sce_OS-up_2.0	None	None	None	None	None	None	None	None	None	None	None	None	None	None	None	None	None	None	None	None	None	None	None	None	None	None	None	None	None	None	None	None	None
179.m00327	CNAG_02751	None	None	None	None	None	None	None	KOG0725	R	Reductases with broad range of substrate specificities	short-chain dehydrogenase	None	None	None	None	None	None	None	None	None	None	None	None	None	None	None	None	None	None	None	None	None	None	None	None	None	None	None	None	None	None	None	None	None	None	None	None	None
179.m00342	CNAG_02769	None	None	None	None	None	None	None	KOG1239	OU	Inner membrane protein translocase involved in respiratory chain assembly	conserved hypothetical protein	None	None	None	None	None	None	None	None	None	None	None	None	None	None	None	None	None	None	None	None	None	None	None	None	None	None	None	None	None	None	None	None	None	None	None	None	None
179.m00352	CNAG_02788	None	None	None	None	None	None	None	None	None	None	conserved hypothetical protein	None	None	None	None	None	None	None	None	None	None	None	None	None	None	None	None	None	None	None	None	None	None	None	None	None	None	None	None	None	None	None	None	None	None	None	None	None
179.m00374	CNAG_02817	None	None	SPAC9E9.07c	ypt2	orf19.2571	ca2681	SEC4	KOG0078	TU	GTP-binding protein SEC4, small G protein superfamily, and related Ras family GTP-binding proteins	rab/GTPase	None	GTPase Ypt2	GTP-binding protein	None	None	None	None	None	None	None	None	None	None	None	None	None	None	None	None	None	None	None	None	None	None	None	None	None	None	None	None	None	None	None	None	None	None
179.m00392	CNAG_02842	YNL252C	MRPL17	SPCC126.05c	mrpl17	orf19.585	ca3432	MRPL17	KOG4548	J	Mitochondrial ribosomal protein L17	conserved hypothetical protein	Mitochondrial ribosomal protein of the large subunit	mitochondrial ribosomal protein subunit L17	ribosomal protein of the large subunit (YmL30), mitochondrial (by homology)	None	None	Sce_XS-up_2.0	None	None	None	None	None	None	None	None	None	None	None	None	None	None	None	None	None	None	None	None	None	None	None	None	None	None	None	None	None	None	None
179.m00394	CNAG_02844	YCL004W	PGS1	SPBP18G5.02	None	orf19.7072	ca5625	PEL1	KOG3964	I	Phosphatidylglycerolphosphate synthase	CDP-diacylglycerol-glycerol-3-phosphate 3-phosphatidyltransferase	Phosphatidylglycerolphosphate synthase, catalyzes the synthesis of phosphatidylglycerolphosphate from CDP-diacylglycerol and sn-glycerol 3-phosphate in the first committed and rate-limiting step of cardiolipin biosynthesis	CDP-diacylglycerol-glycerol-3-phosphate3-phosphatidyltransferase	CDP-diacylglycerol-serine-O-phosphatidyltransfer ase (by homology)	None	None	None	None	None	None	None	None	None	None	None	None	None	None	None	None	None	None	None	None	None	None	None	None	None	None	None	None	None	Cal_XS-dw_1.5	None	None	None	None
179.m00408	CNAG_02860	None	None	SPBC21B10.07	None	None	None	None	None	None	None	endo-1,3(4)-beta-glucanase	None	glycosyl hydrolase family 16	None	None	None	None	None	None	None	None	None	None	None	None	None	None	None	None	None	None	None	None	None	None	None	None	None	None	None	None	None	None	None	None	None	None	None
179.m00435	CNAG_02896	None	None	None	None	None	None	None	KOG1393	I	Hydroxymethylglutaryl-CoA synthase	hydroxymethylglutaryl-CoA synthase	None	None	None	None	None	None	None	None	None	None	None	None	None	None	None	None	None	None	None	None	None	None	None	None	None	None	None	None	None	None	None	None	None	None	None	None	None
179.m00453	CNAG_02916	YDR377W	ATP17	SPBC1604.11	atp17	orf19.7509.1	ca5852	ATP17	None	None	None	hydrogen-transporting ATP synthase	Subunit f of the F0 sector of mitochondrial F1F0 ATP synthase, which is a large, evolutionarily conserved enzyme complex required for ATP synthesis	F0-ATPase subunit F	F1F0-ATPase complex, F1 delta subunit f (by homology)	None	None	None	None	None	None	None	None	None	None	None	None	None	None	None	None	None	None	None	None	None	None	None	None	None	None	None	None	None	None	None	None	None	None
179.m00457	CNAG_02921	None	None	None	None	None	None	None	KOG1012	R	Ca2+-dependent lipid-binding protein CLB1/vesicle protein vp115/Granuphilin A, contains C2 domain	conserved hypothetical protein	None	None	None	None	None	None	None	None	None	None	None	None	None	None	None	None	None	None	None	None	None	None	None	None	None	None	None	None	None	None	None	None	None	None	None	None	None
179.m00481	CNAG_02943	YIL105C	SLM1	SPAC637.13c	None	orf19.3505	ca2455	IPF12228	None	None	None	cytoplasmic protein	Phosphoinositide PI4,5P(2) binding protein, forms a complex with Slm2p; acts downstream of Mss4p in a pathway regulating actin cytoskeleton organization in response to stress; subunit of and phosphorylated by the TORC2 complex	cytoskeletal signaling protein	unknown function	None	None	None	None	Sce_HS-up_2.0	None	None	None	None	None	Spo_XS-up_2.0	None	Spo_Cd-up_2.0	None	None	None	None	None	None	None	None	None	None	None	None	None	None	None	None	None	None	None	None	None
179.m00483	CNAG_02943	YIL105C	SLM1	SPAC637.13c	None	orf19.3505	ca2455	IPF12228	None	None	None	cytoplasmic protein	Phosphoinositide PI4,5P(2) binding protein, forms a complex with Slm2p; acts downstream of Mss4p in a pathway regulating actin cytoskeleton organization in response to stress; subunit of and phosphorylated by the TORC2 complex	cytoskeletal signaling protein	unknown function	None	None	None	None	Sce_HS-up_2.0	None	None	None	None	None	Spo_XS-up_2.0	None	Spo_Cd-up_2.0	None	None	None	None	None	None	None	None	None	None	None	None	None	None	None	None	None	None	None	None	None
179.m00495	CNAG_02956	YPR133C	SPN1	SPBC19G7.16	iws1	orf19.6252	ca0566	IPF13522	KOG1793	S	Uncharacterized conserved protein	transcription factor IWS1	Protein that interacts with Spt6p and copurifies with Spt5p and RNA polymerase II, probable transcriptional elongation factor; metazoan homologs contain an acidic N terminus; mutations in the gene confer an Spt- phenotype	transcription elongation factor complex subunit Iws1 (predicted)	unknown function	None	None	None	Sce_XS-dw_2.0	None	None	None	None	None	None	None	None	None	None	None	None	None	None	None	None	None	None	None	None	None	None	None	None	None	None	None	None	None	None
179.m00499	CNAG_02958	None	None	None	None	orf19.4213	ca2922	FET31	KOG1263	Q	Multicopper oxidases	ferroxidase	None	None	cell surface ferroxidase (by homology)	None	None	None	None	None	None	None	None	None	None	None	None	None	None	None	None	None	None	None	None	None	None	None	None	None	None	None	None	None	None	None	None	None	None
179.m00510	CNAG_02976	YDR236C	FMN1	SPCC18.16c	fmn1	orf19.4373	ca2584	IPF9440	KOG3110	H	Riboflavin kinase	riboflavin kinase	Riboflavin kinase, phosphorylates riboflavin to form riboflavin monophosphate (FMN), which is a necessary cofactor for many enzymes; localizes to microsomes and to the mitochondrial inner membrane	riboflavin kinase Fmn1	similar to Saccharomyces cerevisiae Fmn1p riboflavin kinase (by homology)	None	None	None	None	None	None	None	None	None	None	None	None	None	None	None	None	None	None	Cal_XS-up	None	None	None	Cal_SSR.XS-up	None	None	None	None	None	None	None	None	None	None	None
179.m00515	CNAG_02983	None	None	None	None	None	None	None	KOG3595	Z	Dyneins, heavy chain	conserved hypothetical protein	None	None	None	None	None	None	None	None	None	None	None	None	None	None	None	None	None	None	None	None	None	None	None	None	None	None	None	None	None	None	None	None	None	None	None	None	None
179.m00520	CNAG_02990	YOR052C	None	SPBC1271.05c	None	orf19.5813	ca4164	IPF9302	None	None	None	nuclear protein	None	zinc finger protein zf-AN1 type	unknown function	Sce_OS-up_2.0	None	Sce_XS-up_2.0	None	Sce_HS-up_2.0	None	Sce_CSR-up_2.0	None	None	None	Spo_XS-up_2.0	None	None	None	None	None	None	None	None	None	Cal_HS-up	None	Cal_SSR.HS-up	None	None	None	None	None	Cal_XS-up_1.5	None	None	None	None	None
179.m00548	CNAG_01548	YDR021W	FAL1	SPAC1F5.10	None	orf19.2488	ca3808	FAL1	KOG0328	J	Predicted ATP-dependent RNA helicase FAL1, involved in rRNA maturation, DEAD-box superfamily	DEAD box polypeptide 48	Nucleolar protein required for maturation of 18S rRNA, member of the eIF4A subfamily of DEAD-box ATP-dependent RNA helicases	ATP-dependent RNA helicase, eIF4A related (predicted)	ATP-dependent RNA helicase	None	Sce_OS-dw_2.0	None	Sce_XS-dw_2.0	None	Sce_HS-dw_2.0	None	Sce_CSR-dw_2.0	None	None	None	None	None	None	None	None	None	None	None	None	None	None	None	None	None	None	None	None	None	Cal_XS-dw_1.5	None	None	None	None
179.m00555	CNAG_01539	YJL153C	INO1	None	None	orf19.7585	ca5986	INO1	KOG0693	I	Myo-inositol-1-phosphate synthase	inositol-3-phosphate synthase	Inositol 1-phosphate synthase, involved in synthesis of inositol phosphates and inositol-containing phospholipids; transcription is coregulated with other phospholipid biosynthetic genes by Ino2p and Ino4p, which bind the UASINO DNA element	None	myo-inositol-1-phosphate synthase	None	None	Sce_XS-up_2.0	Sce_XS-dw_2.0	Sce_HS-up_2.0	None	None	None	None	None	None	None	None	None	None	None	None	None	Cal_XS-up	None	None	None	Cal_SSR.XS-up	None	None	None	None	None	None	None	None	None	None	None
179.m00560	CNAG_01532	YOR109W	INP53	SPBC2G2.02	syj1	orf19.7052	ca5642	INP52	KOG0566	U	Inositol-1,4,5-triphosphate 5-phosphatase (synaptojanin), INP51/INP52/INP53 family	phosphatidylinositol phosphate phosphatase	Polyphosphatidylinositol phosphatase, dephosphorylates multiple phosphatidylinositols; involved in trans Golgi network-to-early endosome pathway; hyperosmotic stress causes translocation to actin patches; contains Sac1 and 5-ptase domains	inositol-polyphosphate 5-phosphatase (synaptojanin homolog 1)	phosphatidylinositol phosphate phosphatase (by homology)	None	None	None	None	None	None	None	None	None	None	None	None	None	None	None	None	None	None	None	None	None	None	None	None	None	None	None	None	None	None	None	None	None	None
179.m00571	CNAG_01520	None	None	None	None	None	None	None	None	None	None	protein-arginine N-methyltransferase	None	None	None	None	None	None	None	None	None	None	None	None	None	None	None	None	None	None	None	None	None	None	None	None	None	None	None	None	None	None	None	None	None	None	None	None	None
179.m00584	CNAG_01501	YER163C	None	SPBC31F10.03	None	orf19.372	ca0880	IPF19542.3f	KOG3182	P	Predicted cation transporter	conserved hypothetical protein	None	ChaC-like protein	unknown function, 3-prime end	None	None	Sce_XS-up_2.0	None	Sce_HS-up_2.0	None	None	None	None	None	None	None	None	None	None	None	None	None	None	None	None	None	None	None	None	None	None	None	None	None	None	None	None	None
179.m00606	CNAG_01467	YML018C	None	SPBC405.03c	None	orf19.7427	ca5722	IPF2446	KOG2765	S	Predicted membrane protein	vacuolar membrane protein	None	membrane transporter (predicted)	unknown function	None	None	None	Sce_XS-dw_2.0	None	Sce_HS-dw_2.0	None	None	None	None	None	None	None	None	None	None	None	None	None	Cal_XS-dw	None	Cal_HS-dw	None	None	None	None	None	None	None	Cal_XS-dw_1.5	None	None	None	None
179.m00621	CNAG_01472	YPR003C	None	SPCC320.05	None	orf19.2149	ca3189	IPF11607	KOG0236	P	Sulfate/bicarbonate/oxalate exchanger SAT-1 and related transporters (SLC26 family)	endoplasmic reticulum protein	None	sulphate transporter (predicted)	unknown function	None	None	None	None	Sce_HS-up_2.0	None	None	None	None	None	Spo_XS-up_2.0	None	Spo_Cd-up_2.0	None	None	None	None	None	None	None	None	None	None	None	None	None	None	None	None	None	None	None	None	None
179.m00623	CNAG_01475	None	None	None	None	orf19.4831	ca4749	IPF4481	None	None	None	sphingolipid C9-methyltransferase	None	None	unknown function	None	None	None	None	None	None	None	None	None	None	None	None	None	None	None	None	None	None	None	None	None	None	None	None	None	None	None	None	None	Cal_XS-dw_1.5	None	None	None	None
179.m00627	CNAG_01485	YDL174C	DLD1	None	None	orf19.6043	ca4905	DLD1	KOG1231	C	Proteins containing the FAD binding domain	D-lactate dehydrogenase cytochrome oxidoreductase protein	D-lactate dehydrogenase, oxidizes D-lactate to pyruvate, transcription is heme-dependent, repressed by glucose, and derepressed in ethanol or lactate; located in the mitochondrial inner membrane	None	D-lactate ferricytochrome C oxidoreductase (by homology)	None	None	None	None	Sce_HS-up_2.0	None	None	None	None	None	None	None	None	None	None	None	None	None	None	None	None	None	None	None	None	None	None	None	None	None	None	None	None	None
179.m00630	CNAG_01481	None	None	None	None	None	None	None	KOG1824	R	TATA-binding protein-interacting protein	conserved hypothetical protein	None	None	None	None	None	None	None	None	None	None	None	None	None	None	None	None	None	None	None	None	None	None	None	None	None	None	None	None	None	None	None	None	None	None	None	None	None
179.m00652	None	None	None	None	None	None	None	None	None	None	None	None	None	None	None	None	None	None	None	None	None	None	None	None	None	None	None	None	None	None	None	None	None	None	None	None	None	None	None	None	None	None	None	None	None	None	None	None	None
179.m00658	CNAG_01632	YDR058C	TGL2	None	None	orf19.3043	ca5070	IPF3594	None	None	None	triacylglycerol lipase	Protein with lipolytic activity towards triacylglycerols and diacylglycerols when expressed in E. coli; role in yeast lipid degradation is unclear	None	triglyceride lipase (by homology)	Sce_OS-up_2.0	None	Sce_XS-up_2.0	None	Sce_HS-up_2.0	None	Sce_CSR-up_2.0	None	None	None	None	None	None	None	None	None	None	None	None	None	None	None	None	None	None	None	None	None	None	None	None	None	None	None
179.m00663	CNAG_01729	YMR128W	ECM16	SPAPB1A10.06c	None	orf19.2090	ca4811	ECM16	KOG0926	AJ	DEAH-box RNA helicase	DEAH box polypeptide 37	Essential DEAH-box ATP-dependent RNA helicase specific to the U3 snoRNP, predominantly nucleolar in distribution, required for 18S rRNA synthesis	ATP-dependent RNA helicase Dhr1 (predicted)	RNA helicase (by homology)	None	None	None	Sce_XS-dw_2.0	None	Sce_HS-dw_2.0	None	None	None	None	None	None	None	None	None	None	None	None	None	None	None	Cal_HS-dw	None	Cal_SSR.HS-dw	None	None	None	None	None	Cal_XS-dw_1.5	None	None	None	None
179.m00667	CNAG_01779	None	None	None	None	None	None	None	KOG0516	Z	Dystonin, GAS (Growth-arrest-specific protein), and related proteins	conserved hypothetical protein	None	None	None	None	None	None	None	None	None	None	None	None	None	None	None	None	None	None	None	None	None	None	None	None	None	None	None	None	None	None	None	None	None	None	None	None	None
179.m00668	CNAG_01760	None	None	None	None	None	None	None	KOG1980	S	Uncharacterized conserved protein	conserved hypothetical protein	None	None	None	None	None	None	None	None	None	None	None	None	None	None	None	None	None	None	None	None	None	None	None	None	None	None	None	None	None	None	None	None	None	None	None	None	None
179.m00679	CNAG_01797	YDR175C	RSM24	None	None	None	None	None	KOG3933	J	Mitochondrial ribosomal protein S28	conserved hypothetical protein	Mitochondrial ribosomal protein of the small subunit	None	None	None	None	None	None	None	None	None	None	None	None	None	None	None	None	None	None	None	None	None	None	None	None	None	None	None	None	None	None	None	None	None	None	None	None
179.m00692	CNAG_02795	YDR408C	ADE8	SPCC569.08c	ade5	orf19.5789	ca4147	ADE8	KOG3076	G	5'-phosphoribosylglycinamide formyltransferase	phosphoribosylglycinamide formyltransferase	Phosphoribosyl-glycinamide transformylase, catalyzes a step in the 'de novo' purine nucleotide biosynthetic pathway	phosphoribosylglycinamide formyltransferase	Phosphoribosylglycinamide formyltransferase (GART)	None	None	None	Sce_XS-dw_2.0	Sce_HS-up_2.0	Sce_HS-dw_2.0	None	None	None	None	None	None	None	Spo_Cd-dw_2.0	None	None	None	None	None	None	None	None	None	None	None	None	None	None	None	None	None	None	None	None
179.m00709	CNAG_02855	None	None	SPCC553.06	None	None	None	None	KOG2447	O	Oligosaccharyltransferase, delta subunit (ribophorin II)	conserved hypothetical protein	None	oligosaccharyltransferase subunit	None	None	None	None	None	None	None	None	None	None	None	None	None	None	None	None	None	None	None	None	None	None	None	None	None	None	None	None	None	None	None	None	None	None	None
179.m00715	CNAG_02857	YFR022W	ROG3	SPAC31A2.12	None	orf19.1509	ca2177	ROD1	KOG3780	R	Thioredoxin binding protein TBP-2/VDUP1	conserved hypothetical protein	Protein that binds to Rsp5p, which is a hect-type ubiquitin ligase, via its 2 PY motifs; has similarity to Rod1p; mutation suppresses the temperature sensitivity of an mck1 rim11 double mutant	arrestin/PY protein 1	O-dinitrobenzene,calcium and zinc resistance protein (by homology)	None	None	None	Sce_XS-dw_2.0	None	None	None	None	Spo_OS-up_2.0	None	Spo_XS-up_2.0	None	Spo_Cd-up_2.0	None	Spo_CESR-up	None	None	None	None	None	None	None	None	None	None	None	None	None	None	None	None	None	None	None
179.m05154	CNAG_02716	None	None	None	None	None	None	None	KOG4682	R	Uncharacterized conserved protein, contains BTB/POZ domain	conserved hypothetical protein	None	None	None	None	None	None	None	None	None	None	None	None	None	None	None	None	None	None	None	None	None	None	None	None	None	None	None	None	None	None	None	None	None	None	None	None	None
179.m05170	CNAG_01506	None	None	None	None	None	None	None	KOG0160	Z	Myosin class V heavy chain	conserved hypothetical protein	None	None	None	None	None	None	None	None	None	None	None	None	None	None	None	None	None	None	None	None	None	None	None	None	None	None	None	None	None	None	None	None	None	None	None	None	None
179.m05174	CNAG_01466	None	None	None	None	None	None	None	KOG4197	R	FOG: PPR repeat	conserved hypothetical protein	None	None	None	None	None	None	None	None	None	None	None	None	None	None	None	None	None	None	None	None	None	None	None	None	None	None	None	None	None	None	None	None	None	None	None	None	None
180.m00003	CNAG_05979	None	None	None	None	None	None	None	KOG0069	C	Glyoxylate/hydroxypyruvate reductase (D-isomer-specific 2-hydroxy acid dehydrogenase superfamily)	phosphoglycerate dehydrogenase	None	None	None	None	None	None	None	None	None	None	None	None	None	None	None	None	None	None	None	None	None	None	None	None	None	None	None	None	None	None	None	None	None	None	None	None	None
180.m00005	CNAG_05976	YOR310C	NOP58	SPAC23G3.06	None	orf19.1199	ca1438	NOP58	KOG2572	AJ	Ribosome biogenesis protein - Nop58p/Nop5p	SnoRNA binding domain containing protein	Protein involved in pre-rRNA processing, 18S rRNA synthesis, and snoRNA synthesis; component of the small subunit processome complex, which is required for processing of pre-18S rRNA	U3 snoRNP protein Nop58 (predicted)	nucleolar protein required for pre-18S rRNA processing	None	Sce_OS-dw_2.0	None	Sce_XS-dw_2.0	None	Sce_HS-dw_2.0	None	Sce_CSR-dw_2.0	None	None	None	None	None	None	None	None	None	None	None	None	None	None	None	None	None	Cal_OS-dw_1.5	None	Cal_OS-dw_2.0	None	None	None	None	None	None
180.m00014	CNAG_07699	None	None	None	None	None	None	None	None	None	None	zinc finger family protein	None	None	None	None	None	None	None	None	None	None	None	None	None	None	None	None	None	None	None	None	None	None	None	None	None	None	None	None	None	None	None	None	None	None	None	None	None
180.m00017	CNAG_07695	None	None	SPAC9.10	thi9	None	None	None	KOG1289	E	Amino acid transporters	gamma-aminobutyric acid transporter	None	thiamine transporter Thi9	None	None	None	None	None	None	None	None	None	None	None	Spo_XS-up_2.0	None	None	Spo_Cd-dw_2.0	None	None	None	None	None	None	None	None	None	None	None	None	None	None	None	None	None	None	None	None
180.m00018	CNAG_07695	None	None	SPAC9.10	thi9	None	None	None	KOG1289	E	Amino acid transporters	gamma-aminobutyric acid transporter	None	thiamine transporter Thi9	None	None	None	None	None	None	None	None	None	None	None	Spo_XS-up_2.0	None	None	Spo_Cd-dw_2.0	None	None	None	None	None	None	None	None	None	None	None	None	None	None	None	None	None	None	None	None
180.m00019	CNAG_07695	None	None	SPAC9.10	thi9	None	None	None	KOG1289	E	Amino acid transporters	gamma-aminobutyric acid transporter	None	thiamine transporter Thi9	None	None	None	None	None	None	None	None	None	None	None	Spo_XS-up_2.0	None	None	Spo_Cd-dw_2.0	None	None	None	None	None	None	None	None	None	None	None	None	None	None	None	None	None	None	None	None
180.m00025	CNAG_05925	YLR314C	CDC3	SPAC4F10.11	spn1	orf19.1055	ca0844	CDC3	KOG2655	DZU	Septin family protein (P-loop GTPase)	septin ring protein	Component of the septin ring of the mother-bud neck that is required for cytokinesis; septins recruit proteins to the neck and can act as a barrier to diffusion at the membrane, and they comprise the 10nm filaments seen with EM	septin Spn1	Cell division control protein	None	None	None	None	None	None	None	None	None	None	None	None	None	None	None	None	None	None	None	None	None	None	None	None	None	None	None	None	None	None	None	None	None	None
180.m00028	CNAG_05921	YOR245C	DGA1	SPCC1235.15	dga1	orf19.6941	ca4709	IPF5895	KOG0831	I	Acyl-CoA:diacylglycerol acyltransferase (DGAT)	diacylglycerol O-acyltransferase	Diacylglycerol acyltransferase, catalyzes the terminal step of triacylglycerol (TAG) formation, acylates diacylglycerol using acyl-CoA as an acyl donor, localized to lipid particles	diacylglycerol O-acyltransferase	unknown function	Sce_OS-up_2.0	None	None	None	None	None	None	None	None	None	Spo_XS-up_2.0	None	Spo_Cd-up_2.0	None	None	None	None	None	None	None	None	None	None	None	None	None	None	None	None	None	None	None	None	None
180.m00066	CNAG_05847	YDR353W	TRR1	SPBC3F6.03	trr1	orf19.4290	ca3059	TRR1	KOG0404	O	Thioredoxin reductase	thioredoxin-disulfide reductase	Cytoplasmic thioredoxin reductase, key regulatory enzyme that determines the redox state of the thioredoxin system, which acts as a disulfide reductase system and protects cells against both oxidative and reductive stress	thioredoxin reductase Trr1	Thioredoxin reductase (by homology)	Sce_OS-up_2.0	Sce_OS-dw_2.0	Sce_XS-up_2.0	None	None	None	None	None	None	None	Spo_XS-up_2.0	None	None	None	None	None	None	None	Cal_XS-up	None	None	None	Cal_SSR.XS-up	None	None	None	None	None	Cal_XS-up_1.5	None	Cal_XS-up_2.0	None	None	None
180.m00072	None	None	None	None	None	None	None	None	None	None	None	None	None	None	None	None	None	None	None	None	None	None	None	None	None	None	None	None	None	None	None	None	None	None	None	None	None	None	None	None	None	None	None	None	None	None	None	None	None
180.m00079	CNAG_05829	YHR077C	NMD2	SPAC19A8.08	upf2	orf19.864	ca1862	NMD2	KOG2051	A	Nonsense-mediated mRNA decay 2 protein	conserved hypothetical protein	Protein involved in the nonsense-mediated mRNA decay (NMD) pathway; interacts with Nam7p and Upf3p; involved in telomere maintenance	nonsense-mediated decay protein Upf2	Nonsense-mediated mRNA decay protein 2 (by homology)	None	None	None	None	None	None	None	None	None	None	None	None	None	None	None	None	None	None	None	None	None	None	None	None	None	None	None	None	None	None	None	None	None	None
180.m00083	CNAG_05805	None	None	None	None	None	None	None	KOG4466	DK	Component of histone deacetylase complex (breast carcinoma metastasis suppressor 1 protein in human)	conserved hypothetical protein	None	None	None	None	None	None	None	None	None	None	None	None	None	None	None	None	None	None	None	None	None	None	None	None	None	None	None	None	None	None	None	None	None	None	None	None	None
180.m00099	CNAG_05759	YNR016C	ACC1	SPAC56E4.04c	cut6	orf19.7466	ca5816	ACC1	KOG0368	I	Acetyl-CoA carboxylase	acetyl-CoA carboxylase	Acetyl-CoA carboxylase, biotin containing enzyme that catalyzes the carboxylation of acetyl-CoA to form malonyl-CoA; required for de novo biosynthesis of long-chain fatty acids	acetyl-CoA carboxylase	acetyl-coenzyme-A carboxylase (by homology)	None	None	None	None	None	None	None	None	None	None	None	None	None	None	None	None	None	None	None	None	None	None	None	None	None	Cal_OS-dw_1.5	None	None	None	None	None	None	None	None
180.m00115	CNAG_05724	None	None	None	None	None	None	None	None	None	None	conserved hypothetical protein	None	None	None	None	None	None	None	None	None	None	None	None	None	None	None	None	None	None	None	None	None	None	None	None	None	None	None	None	None	None	None	None	None	None	None	None	None
180.m00127	CNAG_05683	None	None	None	None	None	None	None	KOG0244	Z	Kinesin-like protein	conserved hypothetical protein	None	None	None	None	None	None	None	None	None	None	None	None	None	None	None	None	None	None	None	None	None	None	None	None	None	None	None	None	None	None	None	None	None	None	None	None	None
180.m00143	CNAG_06696	YGL190C	CDC55	SPAC227.07c	pab1	orf19.1468	ca4535	CDC55	KOG1354	T	Serine/threonine protein phosphatase 2A, regulatory subunit	Ppp2r2b protein	Non-essential regulatory subunit B of protein phosphatase 2A, which has multiple roles in mitosis and protein biosynthesis; involved in regulation of mitotic exit; found in the nucleus of most cells, also at the bud neck and at the bud tip	protein phosphatase regulatory subunit Pab1	B subunit of protein phosphatase 2A (by homology)	None	None	None	None	None	None	None	None	None	None	None	None	None	None	None	None	None	None	None	None	None	None	None	None	None	None	None	None	None	None	None	None	None	None
180.m00165	CNAG_06668	YNR018W	AIM38	None	None	None	None	None	None	None	None	mitochondrial protein	Putative protein of unknown function; non-tagged protein is detected in purified mitochondria; null mutant displays decreased frequency of mitochondrial genome loss (petite formation) and severe growth defect in minimal glycerol media	None	None	None	None	None	None	None	None	None	None	None	None	None	None	None	None	None	None	None	None	None	None	None	None	None	None	None	None	None	None	None	None	None	None	None	None
180.m00179	CNAG_06631	None	None	None	None	None	None	None	KOG1836	W	Extracellular matrix glycoprotein Laminin subunits alpha and gamma	myosin heavy chain	None	None	None	None	None	None	None	None	None	None	None	None	None	None	None	None	None	None	None	None	None	None	None	None	None	None	None	None	None	None	None	None	None	None	None	None	None
180.m00186	CNAG_06623	None	None	None	None	orf19.3894	ca1052	IPF15861	None	None	None	myo-inositol oxygenase	None	None	unknown function	None	None	None	None	None	None	None	None	None	None	None	None	None	None	None	None	None	None	None	None	None	None	None	None	None	None	None	None	None	None	None	None	None	None
180.m00189	CNAG_06617	None	None	None	None	None	None	None	KOG4419	F	5' nucleotidase	conserved hypothetical protein	None	None	None	None	None	None	None	None	None	None	None	None	None	None	None	None	None	None	None	None	None	None	None	None	None	None	None	None	None	None	None	None	None	None	None	None	None
180.m00191	CNAG_06614	YPL206C	None	SPAC4D7.02c	None	orf19.3483	ca2896	IPF14981	KOG2258	C	Glycerophosphoryl diester phosphodiesterase	glycerophosphodiesterase	None	glycerophosphoryl diester phosphodiesterase (predicted)	unknown function	None	None	None	None	Sce_HS-up_2.0	None	None	None	Spo_OS-up_2.0	None	Spo_XS-up_2.0	None	Spo_Cd-up_2.0	None	Spo_CESR-up	None	Cal_OS-up	None	None	None	None	None	Cal_SSR.OS-up	None	Cal_OS-up_1.5	None	None	None	Cal_XS-up_1.5	None	None	None	None	None
180.m00208	CNAG_06580	None	None	None	None	None	None	None	KOG0017	R	FOG: Transposon-encoded proteins with TYA, reverse transcriptase, integrase domains in various combinations	VosA	None	None	None	None	None	None	None	None	None	None	None	None	None	None	None	None	None	None	None	None	None	None	None	None	None	None	None	None	None	None	None	None	None	None	None	None	None
180.m00210	CNAG_06578	None	None	None	None	None	None	None	KOG1778	K	CREB binding protein/P300 and related TAZ Zn-finger proteins	conserved hypothetical protein	None	None	None	None	None	None	None	None	None	None	None	None	None	None	None	None	None	None	None	None	None	None	None	None	None	None	None	None	None	None	None	None	None	None	None	None	None
180.m00211	CNAG_06577	None	None	None	None	None	None	None	None	None	None	conserved hypothetical protein	None	None	None	None	None	None	None	None	None	None	None	None	None	None	None	None	None	None	None	None	None	None	None	None	None	None	None	None	None	None	None	None	None	None	None	None	None
180.m00212	CNAG_06576	None	None	None	None	None	None	None	KOG1189	E	Global transcriptional regulator, cell division control protein	allergen	None	None	None	None	None	None	None	None	None	None	None	None	None	None	None	None	None	None	None	None	None	None	None	None	None	None	None	None	None	None	None	None	None	None	None	None	None
180.m00213	CNAG_06574	None	None	None	None	None	None	None	None	None	None	antiphagocytic protein 1	None	None	None	None	None	None	None	None	None	None	None	None	None	None	None	None	None	None	None	None	None	None	None	None	None	None	None	None	None	None	None	None	None	None	None	None	None
180.m00230	CNAG_06548	YCL045C	None	SPAC25H1.07	None	orf19.4131	ca1223	IPF14870	KOG2103	S	Uncharacterized conserved protein	endoplasmic reticulum protein	None	DUF1620 family protein	unknown function	None	None	None	None	None	None	None	None	None	None	None	None	None	None	None	None	None	None	None	None	None	None	None	None	None	None	None	None	None	Cal_XS-dw_1.5	None	None	None	None
180.m00232	None	None	None	None	None	None	None	None	None	None	None	None	None	None	None	None	None	None	None	None	None	None	None	None	None	None	None	None	None	None	None	None	None	None	None	None	None	None	None	None	None	None	None	None	None	None	None	None	None
180.m00233	CNAG_06541	None	None	None	None	orf19.278	ca2778	MTR	KOG1303	E	Amino acid transporters	conserved hypothetical protein	None	None	neutral amino acid permease-like by homology	None	None	None	None	None	None	None	None	None	None	None	None	None	None	None	None	None	None	None	None	None	None	None	None	None	None	None	None	None	None	None	None	None	None
180.m00241	CNAG_06531	None	None	None	None	None	None	None	None	None	None	conserved hypothetical protein	None	None	None	None	None	None	None	None	None	None	None	None	None	None	None	None	None	None	None	None	None	None	None	None	None	None	None	None	None	None	None	None	None	None	None	None	None
180.m00263	CNAG_05915	None	None	None	None	None	None	None	None	None	None	hypothetical protein	None	None	None	None	None	None	None	None	None	None	None	None	None	None	None	None	None	None	None	None	None	None	None	None	None	None	None	None	None	None	None	None	None	None	None	None	None
180.m00277	CNAG_05895	YDR301W	CFT1	SPBC1709.08	cft1	orf19.2760	ca0426	CFT1	KOG1896	A	mRNA cleavage and polyadenylation factor II complex, subunit CFT1 (CPSF subunit)	cleavage and polyadenylation specific protein	RNA-binding subunit of the mRNA cleavage and polyadenylation factor; involved in poly(A) site recognition and required for both pre-mRNA cleavage and polyadenylation, 51% sequence similarity with mammalian AAUAA-binding subunit of CPSF	cleavage factor one Cft1 (predicted)	pre-mRNA 3 -end processing factor CF II (by homology)	None	None	None	None	None	None	None	None	None	None	None	None	None	None	None	None	None	None	None	None	None	None	None	None	None	None	None	None	None	None	None	None	None	None
180.m00314	CNAG_05833	None	None	None	None	None	None	None	KOG2533	G	Permease of the major facilitator superfamily	allantoate transporter	None	None	None	None	None	None	None	None	None	None	None	None	None	None	None	None	None	None	None	None	None	None	None	None	None	None	None	None	None	None	None	None	None	None	None	None	None
180.m00330	CNAG_05823	None	None	None	None	None	None	None	KOG1205	Q	Predicted dehydrogenase	conserved hypothetical protein	None	None	None	None	None	None	None	None	None	None	None	None	None	None	None	None	None	None	None	None	None	None	None	None	None	None	None	None	None	None	None	None	None	None	None	None	None
180.m00336	CNAG_05799	YLR308W	CDA2	None	None	orf19.7503	ca5847	CDA2	None	None	None	chitin deacetylase	Chitin deacetylase, together with Cda1p involved in the biosynthesis ascospore wall component, chitosan; required for proper rigidity of the ascospore wall	None	chitin deacetylase (by homology)	None	None	Sce_XS-up_2.0	None	None	None	None	None	None	None	None	None	None	None	None	None	None	None	None	None	None	None	None	None	None	None	None	None	None	None	None	None	None	None
180.m00359	CNAG_05745	YBR172C	SMY2	SPAC4F10.13c	mpd2	orf19.3141	ca0741	IPF3261	KOG1862	R	GYF domain containing proteins	cytoplasmic protein	Protein of unknown function that interacts with Myo2p; has similarity to S. pombe Mpd2	GYF domain	unknown function	None	None	None	Sce_XS-dw_2.0	None	Sce_HS-dw_2.0	None	None	None	None	None	None	None	None	None	None	None	None	None	None	None	None	None	None	None	None	None	None	None	Cal_XS-dw_1.5	None	None	None	Cal_Cd-dw_1.5
180.m00363	CNAG_05761	YBR135W	CKS1	SPBC1734.14c	suc1	orf19.1282	ca2365	CKS1	KOG3484	D	Cyclin-dependent protein kinase CDC28, regulatory subunit CKS1, and related proteins	protein kinase activator	Cyclin-dependent protein kinase regulatory subunit and adaptor; modulates proteolysis of M-phase targets through interactions with the proteasome; role in transcriptional regulation, recruiting proteasomal subunits to target gene promoters	cyclin-dependent protein kinase regulatory subunit Suc1	cyclin-dependent kinases regulatory subunit (by homology)	None	None	None	None	None	None	None	None	None	None	None	Spo_XS-dw_2.0	None	None	None	None	None	None	None	None	None	None	None	None	None	None	None	None	None	None	None	None	None	None
180.m00377	CNAG_05695	None	None	None	None	None	None	None	KOG1449	T	Predicted Rho GTPase-activating protein CdGAPr	glucosamine 6-phosphate N-acetyltransferase	None	None	None	None	None	None	None	None	None	None	None	None	None	None	None	None	None	None	None	None	None	None	None	None	None	None	None	None	None	None	None	None	None	None	None	None	None
180.m00451	CNAG_06603	YBR281C	DUG2	None	None	orf19.2455	None	None	KOG2276	E	Metalloexopeptidases	WD repeat-containing protein	Probable di- and tri-peptidase; forms a complex with Dug1p and Dug3p to degrade glutathione (GSH) and other peptides containing a gamma-glu-X bond in an alternative pathway to GSH degradation by gamma-glutamyl transpeptidase (Ecm38p)	None	None	None	None	None	None	None	None	None	None	None	None	None	None	None	None	None	None	None	None	None	None	None	None	None	None	None	None	None	None	None	None	None	None	None	None
180.m00452	CNAG_06606	None	None	None	None	None	None	None	KOG0393	R	Ras-related small GTPase, Rho type	rho small monomeric GTPase	None	None	None	None	None	None	None	None	None	None	None	None	None	None	None	None	None	None	None	None	None	None	None	None	None	None	None	None	None	None	None	None	None	None	None	None	None
180.m00465	CNAG_06530	None	None	None	None	None	None	None	KOG2741	GQ	Dimeric dihydrodiol dehydrogenase	conserved hypothetical protein	None	None	None	None	None	None	None	None	None	None	None	None	None	None	None	None	None	None	None	None	None	None	None	None	None	None	None	None	None	None	None	None	None	None	None	None	None
180.m00466	CNAG_06533	YCR011C	ADP1	None	None	orf19.459	None	None	KOG0061	Q	Transporter, ABC superfamily (Breast cancer resistance protein)	ATP-dependent permease	Putative ATP-dependent permease of the ABC transporter family of proteins	None	None	None	None	None	None	Sce_HS-up_2.0	None	None	None	None	None	None	None	None	None	None	None	None	None	None	None	None	None	None	None	None	None	None	None	None	None	None	None	None	None
180.m02938	CNAG_05795	None	None	SPBC713.05	None	None	None	None	KOG0316	S	Conserved WD40 repeat-containing protein	nuclear mRNA splicing protein	None	WD repeat protein, human MAPK organizer 1 (MORG1) family	None	None	None	None	None	None	None	None	None	None	None	None	None	None	None	None	None	None	None	None	None	None	None	None	None	None	None	None	None	None	None	None	None	None	None
180.m02970	CNAG_05876	None	None	None	None	None	None	None	None	None	None	conserved hypothetical protein	None	None	None	None	None	None	None	None	None	None	None	None	None	None	None	None	None	None	None	None	None	None	None	None	None	None	None	None	None	None	None	None	None	None	None	None	None
181.m07801	CNAG_00021	YOL052C	SPE2	SPBP4H10.05c	spe2	orf19.568	ca2712	SPE2	KOG0788	T	S-adenosylmethionine decarboxylase	adenosylmethionine decarboxylase	S-adenosylmethionine decarboxylase, required for the biosynthesis of spermidine and spermine; cells lacking Spe2p require spermine or spermidine for growth in the presence of oxygen but not when grown anaerobically	S-adenosylmethionine decarboxylase proenzyme Spe2	adenosylmethionine decarboxylase precurser(by homology)	None	None	None	None	None	None	None	None	None	None	None	None	None	None	None	None	None	None	None	None	Cal_HS-up	None	Cal_SSR.HS-up	None	None	None	None	None	None	Cal_XS-dw_1.5	None	None	None	None
181.m07803	CNAG_00023	None	None	SPBPB2B2.08	None	None	None	None	None	None	None	conserved hypothetical protein	None	conserved fungal protein	None	None	None	None	None	None	None	None	None	None	None	None	None	Spo_Cd-up_2.0	None	None	None	None	None	None	None	None	None	None	None	None	None	None	None	None	None	None	None	None	None
181.m07827	CNAG_00054	None	None	None	None	None	None	None	None	None	None	DUF1264 domain-containing protein	None	None	None	None	None	None	None	None	None	None	None	None	None	None	None	None	None	None	None	None	None	None	None	None	None	None	None	None	None	None	None	None	None	None	None	None	None
181.m07834	CNAG_00151	None	None	None	None	None	None	None	KOG0155	K	Transcription factor CA150	peptide-binding protein	None	None	None	None	None	None	None	None	None	None	None	None	None	None	None	None	None	None	None	None	None	None	None	None	None	None	None	None	None	None	None	None	None	None	None	None	None
181.m07860	CNAG_00091	None	None	None	None	None	None	None	KOG0845	YU	Nuclear pore complex, Nup98 component (sc Nup145/Nup100/Nup116)	conserved hypothetical protein	None	None	None	None	None	None	None	None	None	None	None	None	None	None	None	None	None	None	None	None	None	None	None	None	None	None	None	None	None	None	None	None	None	None	None	None	None
181.m07895	CNAG_00130	YLR248W	RCK2	SPCC1322.08	srk1	orf19.2268	ca1881	RCK2	KOG0032	T	Ca2+/calmodulin-dependent protein kinase, EF-Hand protein superfamily	CAMK/CAMK1 protein kinase	Protein kinase involved in the response to oxidative and osmotic stress; identified as suppressor of S. pombe cell cycle checkpoint mutations	MAPK-activated protein kinase Srk1	Ca/calmodulin-dependent ser/thr protein kinase (by homology)	None	None	None	None	Sce_HS-up_2.0	None	None	None	Spo_OS-up_2.0	None	Spo_XS-up_2.0	None	Spo_Cd-up_2.0	None	Spo_CESR-up	None	None	None	None	None	None	None	None	None	Cal_OS-up_1.5	None	None	None	None	None	None	None	None	None
181.m07930	CNAG_00165	YLR017W	MEU1	SPAC16C9.02c	None	orf19.6938	ca4708	MEU1	KOG3985	F	Methylthioadenosine phosphorylase MTAP	5'-methylthioadenosine phosphorylase	Methylthioadenosine phosphorylase (MTAP), catalyzes the initial step in the methionine salvage pathway; affects polyamine biosynthesis through regulation of ornithine decarboxylase (Spe1p) activity; regulates ADH2 gene expression	S-methyl-5-thioadenosine phosphorylase (predicted)	regulator of ADH2 expression (by homology)	None	None	None	Sce_XS-dw_2.0	None	Sce_HS-dw_2.0	None	None	None	None	None	Spo_XS-dw_2.0	None	Spo_Cd-dw_2.0	None	None	None	None	None	None	None	None	None	None	None	None	None	None	None	None	None	None	Cal_Cd-up_1.5	None
181.m07953	CNAG_00190	None	None	None	None	None	None	None	KOG0521	T	Putative GTPase activating proteins (GAPs)	conserved hypothetical protein	None	None	None	None	None	None	None	None	None	None	None	None	None	None	None	None	None	None	None	None	None	None	None	None	None	None	None	None	None	None	None	None	None	None	None	None	None
181.m07996	CNAG_00243	None	None	None	None	None	None	None	None	None	None	conserved hypothetical protein	None	None	None	None	None	None	None	None	None	None	None	None	None	None	None	None	None	None	None	None	None	None	None	None	None	None	None	None	None	None	None	None	None	None	None	None	None
181.m08000	CNAG_00248	YLR417W	VPS36	SPBC3B9.09	vps36	orf19.795	ca1469	IPF5078	KOG2760	U	Vacuolar sorting protein VPS36	conserved hypothetical protein	Component of the ESCRT-II complex; contains the GLUE (GRAM Like Ubiquitin binding in EAP45) domain which is involved in interactions with ESCRT-I and ubiquitin-dependent sorting of proteins into the endosome	RBZ zinc finger protein Vps36	unknown function	Sce_OS-up_2.0	None	None	None	None	None	None	None	None	None	None	None	None	None	None	None	None	None	None	None	None	None	None	None	None	None	None	None	None	None	None	None	None	None
181.m08005	CNAG_00256	YDR158W	HOM2	SPCC1827.06c	None	orf19.1559	ca3984	HOM2	KOG4777	E	Aspartate-semialdehyde dehydrogenase	aspartate-semialdehyde dehydrogenase	Aspartic beta semi-aldehyde dehydrogenase, catalyzes the second step in the common pathway for methionine and threonine biosynthesis; expression regulated by Gcn4p and the general control of amino acid synthesis	aspartate semialdehyde dehydrogenase	Aspartate-semialdehyde dehydrogenase (by homology)	None	None	None	None	None	None	None	None	None	None	None	None	None	None	None	None	None	None	None	None	None	None	None	None	None	None	None	None	None	None	None	None	Cal_Cd-up_1.5	None
181.m08013	CNAG_00261	None	None	None	None	None	None	None	KOG0939	OK	E3 ubiquitin-protein ligase/Putative upstream regulatory element binding protein	conserved hypothetical protein	None	None	None	None	None	None	None	None	None	None	None	None	None	None	None	None	None	None	None	None	None	None	None	None	None	None	None	None	None	None	None	None	None	None	None	None	None
181.m08015	CNAG_00264	None	None	None	None	None	None	None	None	None	None	nuclease I	None	None	None	None	None	None	None	None	None	None	None	None	None	None	None	None	None	None	None	None	None	None	None	None	None	None	None	None	None	None	None	None	None	None	None	None	None
181.m08021	CNAG_00271	YEL044W	IES6	SPAC222.04c	ies6	orf19.2889	ca3777	IPF10432	KOG4137	S	Uncharacterized conserved protein	nuclear protein	Protein that associates with the INO80 chromatin remodeling complex under low-salt conditions	chromatin remodeling complex associated protein Ies6 (predicted)	unknown function	None	None	None	None	None	Sce_HS-dw_2.0	None	None	None	None	None	None	None	None	None	None	None	None	None	None	None	None	None	None	None	None	None	None	None	None	None	None	None	None
181.m08030	CNAG_07114	YPL234C	TFP3	SPAC732.01	vma11	orf19.6538	ca4937	TFP3	KOG0232	C	Vacuolar H+-ATPase V0 sector, subunits c/c'	hypothetical protein	Vacuolar ATPase V0 domain subunit c', involved in proton transport activity; hydrophobic integral membrane protein (proteolipid) containing four transmembrane segments; N and C termini are in the vacuolar lumen	V-type ATPase proteolipid subunit	H+-ATPase by homology	None	None	None	None	None	None	None	None	None	None	None	None	None	None	None	None	None	None	None	None	None	None	None	None	None	None	None	None	None	None	None	None	None	None
181.m08037	CNAG_00290	None	None	None	None	None	None	None	KOG2195	OPR	Transferrin receptor and related proteins containing the protease-associated (PA) domain	aminopeptidase	None	None	None	None	None	None	None	None	None	None	None	None	None	None	None	None	None	None	None	None	None	None	None	None	None	None	None	None	None	None	None	None	None	None	None	None	None
181.m08041	CNAG_00294	None	None	None	None	None	None	None	KOG1996	A	mRNA splicing factor	conserved hypothetical protein	None	None	None	None	None	None	None	None	None	None	None	None	None	None	None	None	None	None	None	None	None	None	None	None	None	None	None	None	None	None	None	None	None	None	None	None	None
181.m08046	CNAG_00300	YHR172W	SPC97	SPBC365.15	alp4	orf19.708	ca0662	SPC97	KOG2001	Z	Gamma-tubulin complex, DGRIP84/SPC97 component	gamma-tubulin complex component 2	Component of the microtubule-nucleating Tub4p (gamma-tubulin) complex; interacts with Spc110p at the spindle pole body (SPB) inner plaque and with Spc72p at the SPB outer plaque	gamma tubulin complex Spc97/GCP2 subunit Alp4	spindle pole body component (by homology)	None	None	None	None	None	None	None	None	None	None	None	None	None	None	None	None	None	None	None	None	None	None	None	None	None	None	None	None	None	None	None	None	None	None
181.m08047	CNAG_00301	None	None	None	None	None	None	None	KOG1231	C	Proteins containing the FAD binding domain	conserved hypothetical protein	None	None	None	None	None	None	None	None	None	None	None	None	None	None	None	None	None	None	None	None	None	None	None	None	None	None	None	None	None	None	None	None	None	None	None	None	None
181.m08051	CNAG_00308	None	None	SPAC24C9.08	None	None	None	None	KOG2275	E	Aminoacylase ACY1 and related metalloexopeptidases	gly-X carboxypeptidase	None	vacuolar carboxypeptidase (predicted)	None	None	None	None	None	None	None	None	None	None	None	Spo_XS-up_2.0	None	Spo_Cd-up_2.0	None	None	None	None	None	None	None	None	None	None	None	None	None	None	None	None	None	None	None	None	None
181.m08077	CNAG_00335	YMR028W	TAP42	SPCC63.05	None	orf19.4626	ca5188	TAP42	KOG2830	T	Protein phosphatase 2A-associated protein	conserved hypothetical protein	Essential protein involved in the TOR signaling pathway; physically associates with the protein phosphatase 2A and the SIT4 protein phosphatase catalytic subunits	TAP42 family protein (predicted)	Component of the Tor signaling pathway (by homology)	None	None	None	None	None	None	None	None	None	None	None	None	None	None	None	None	None	None	None	None	None	None	None	None	None	None	None	None	None	None	None	None	None	None
181.m08102	CNAG_00355	None	None	None	None	None	None	None	KOG4520	R	Predicted coiled-coil protein	conserved hypothetical protein	None	None	None	None	None	None	None	None	None	None	None	None	None	None	None	None	None	None	None	None	None	None	None	None	None	None	None	None	None	None	None	None	None	None	None	None	None
181.m08144	CNAG_00398	None	None	None	None	None	None	None	KOG3601	T	Adaptor protein GRB2, contains SH2 and SH3 domains	conserved hypothetical protein	None	None	None	None	None	None	None	None	None	None	None	None	None	None	None	None	None	None	None	None	None	None	None	None	None	None	None	None	None	None	None	None	None	None	None	None	None
181.m08147	CNAG_00401	YLR459W	GAB1	SPAC1952.01	None	orf19.4341	None	None	KOG2552	R	Major facilitator superfamily permease - Cdc91p	cell division cycle protein 91	GPI transamidase subunit, involved in attachment of glycosylphosphatidylinositol (GPI) anchors to proteins; may have a role in recognition of the attachment signal or of the lipid portion of GPI	Pig-U	None	None	None	None	None	None	None	None	None	None	None	None	None	None	None	None	None	None	None	None	None	None	None	None	None	None	None	None	None	None	None	None	None	None	None
181.m08156	CNAG_00410	None	None	SPBC16H5.12c	None	orf19.216	ca3032	IPF12319	None	None	None	conserved hypothetical protein	None	conserved fungal protein	unknown function	None	None	None	None	None	None	None	None	None	None	None	None	None	None	None	None	None	None	None	None	None	None	None	None	None	None	None	None	None	None	None	None	None	None
181.m08193	CNAG_00456	None	None	None	None	None	None	None	KOG0035	Z	Ca2+-binding actin-bundling protein (actinin), alpha chain (EF-Hand protein superfamily)	conserved hypothetical protein	None	None	None	None	None	None	None	None	None	None	None	None	None	None	None	None	None	None	None	None	None	None	None	None	None	None	None	None	None	None	None	None	None	None	None	None	None
181.m08220	CNAG_00485	None	None	None	None	None	None	None	None	None	None	conserved hypothetical protein	None	None	None	None	None	None	None	None	None	None	None	None	None	None	None	None	None	None	None	None	None	None	None	None	None	None	None	None	None	None	None	None	None	None	None	None	None
181.m08223	CNAG_00488	None	None	None	None	None	None	None	KOG3670	I	Phospholipase	conserved hypothetical protein	None	None	None	None	None	None	None	None	None	None	None	None	None	None	None	None	None	None	None	None	None	None	None	None	None	None	None	None	None	None	None	None	None	None	None	None	None
181.m08271	CNAG_00531	YDR039C	ENA2	SPBC839.06	cta3	orf19.5170	ca4425	ENA21.3f	KOG0202	P	Ca2+ transporting ATPase	ENA P-type ATPase 1	P-type ATPase sodium pump, involved in Na+ efflux to allow salt tolerance; likely not involved in Li+ efflux	P-type ATPase, calcium transporting Cta3	P-type ATPase, 3-prime end (by homology)	None	None	None	None	Sce_HS-up_2.0	None	None	None	Spo_OS-up_2.0	None	None	None	None	None	None	None	Cal_OS-up	None	None	Cal_XS-dw	None	None	Cal_SSR.OS-up	Cal_SSR.XS-dw	Cal_OS-up_1.5	None	Cal_OS-up_2.0	None	None	Cal_XS-dw_1.5	None	Cal_XS-dw_2.0	None	None
181.m08277	CNAG_00537	YML042W	CAT2	None	None	orf19.4591	ca5152	CAT2	KOG3717	I	Carnitine O-acyltransferase CRAT	carnitine acetyltransferase	Carnitine acetyl-CoA transferase present in both mitochondria and peroxisomes, transfers activated acetyl groups to carnitine to form acetylcarnitine which can be shuttled across membranes	None	carnitine O-acetyltransferase (by homology)	Sce_OS-up_2.0	None	None	None	Sce_HS-up_2.0	None	None	None	None	None	None	None	None	None	None	None	None	None	None	None	None	None	None	None	Cal_OS-up_1.5	None	Cal_OS-up_2.0	None	None	Cal_XS-dw_1.5	None	None	None	None
181.m08286	CNAG_00545	YDR180W	SCC2	SPAC31A2.05c	mis4	orf19.3080	ca2014	IPF1717.3f	KOG1020	BDL	Sister chromatid cohesion protein SCC2/Nipped-B	IDN3-B	Subunit of cohesin loading factor (Scc2p-Scc4p), a complex required for the loading of cohesin complexes onto chromosomes; involved in establishing sister chromatid cohesion during DSB repair via histone H2AX	cohesin loading factor Mis4	similar to Saccharomyces cerevisiae Scc2p involved in sister chromatid cohesion (by homology)	None	None	Sce_XS-up_2.0	Sce_XS-dw_2.0	None	None	None	None	None	None	None	None	None	None	None	None	None	None	None	None	None	None	None	None	Cal_OS-up_1.5	None	None	None	None	None	None	None	None	None
181.m08296	CNAG_00557	None	None	SPCC1840.10	lsm8	orf19.4305.1	ca2640	IPF2930	KOG1784	A	Small Nuclear ribonucleoprotein splicing factor	conserved hypothetical protein	None	U6 snRNP-associated protein Lsm8 (predicted)	Suppressor of PAB1 (by homology)	None	None	None	None	None	None	None	None	None	None	None	None	None	None	None	None	None	None	None	None	None	None	None	None	None	None	None	None	None	None	None	None	None	None
181.m08298	CNAG_00560	YOR332W	VMA4	SPAC11E3.07	vma4	orf19.2598	ca2270	VMA4	KOG1664	C	Vacuolar H+-ATPase V1 sector, subunit E	vacuolar ATP synthase subunit e	Subunit E of the eight-subunit V1 peripheral membrane domain of the vacuolar H+-ATPase (V-ATPase), an electrogenic proton pump found throughout the endomembrane system; required for the V1 domain to assemble onto the vacuolar membrane	V-type ATPase subunit E	H+-transporting ATPase E chain	None	None	None	None	None	None	None	None	None	None	None	None	None	None	None	None	None	None	None	None	None	None	None	None	None	None	None	None	None	None	None	None	None	None
181.m08322	CNAG_00588	None	None	None	None	None	None	None	KOG3736	O	Polypeptide N-acetylgalactosaminyltransferase	conserved hypothetical protein	None	None	None	None	None	None	None	None	None	None	None	None	None	None	None	None	None	None	None	None	None	None	None	None	None	None	None	None	None	None	None	None	None	None	None	None	None
181.m08327	CNAG_00594	YLR020C	YEH2	SPBC16A3.12c	None	orf19.1887	ca4480	IPF6464	KOG2624	I	Triglyceride lipase-cholesterol esterase	lipid particle protein	Steryl ester hydrolase, catalyzes steryl ester hydrolysis at the plasma membrane; involved in sterol metabolism	triglyceride lipase-cholesterol esterase (predicted)	putative triacylglycerol lipase (by homology)	None	None	None	None	None	None	None	None	None	None	None	None	None	None	None	None	None	None	None	None	None	None	None	None	None	None	None	None	None	None	None	None	None	None
181.m08331	CNAG_00598	None	None	None	None	None	None	None	KOG2533	G	Permease of the major facilitator superfamily	nicotinamide mononucleotide permease	None	None	None	None	None	None	None	None	None	None	None	None	None	None	None	None	None	None	None	None	None	None	None	None	None	None	None	None	None	None	None	None	None	None	None	None	None
181.m08332	CNAG_00599	YNL275W	BOR1	SPBC543.05c	None	orf19.2898	ca3769	IPF13465	KOG1172	P	Na+-independent Cl/HCO3 exchanger AE1 and related transporters (SLC4 family)	anion transporter	Boron efflux transporter of the plasma membrane; binds HCO3-, I-, Br-, NO3- and Cl-; has similarity to the characterized boron efflux transporter A. thaliana BOR1	inorganic anion exchanger (predicted)	Putative anion transport protein (by homology)	None	None	Sce_XS-up_2.0	None	None	None	None	None	None	None	None	None	None	None	None	None	None	None	None	None	None	None	None	None	None	None	None	None	None	None	None	None	None	None
181.m08333	CNAG_00600	None	None	None	None	None	None	None	KOG2053	Z	Mitochondrial inheritance and actin cytoskeleton organization protein	capsular associated protein	None	None	None	None	None	None	None	None	None	None	None	None	None	None	None	None	None	None	None	None	None	None	None	None	None	None	None	None	None	None	None	None	None	None	None	None	None
181.m08334	CNAG_00601	None	None	None	None	None	None	None	KOG1831	K	Negative regulator of transcription	glycosyl hydrolase	None	None	None	None	None	None	None	None	None	None	None	None	None	None	None	None	None	None	None	None	None	None	None	None	None	None	None	None	None	None	None	None	None	None	None	None	None
181.m08349	CNAG_07373	YJL130C	URA2	SPAC22G7.06c	ura1	orf19.2360	ca1315	URA2	KOG0370	R	Multifunctional pyrimidine synthesis protein CAD (includes carbamoyl-phophate synthetase, aspartate transcarbamylase, and glutamine amidotransferase)	aspartate carbamoyltransferase	Bifunctional carbamoylphosphate synthetase (CPSase)-aspartate transcarbamylase (ATCase), catalyzes the first two enzymatic steps in the de novo biosynthesis of pyrimidines; both activities are subject to feedback inhibition by UTP	carbamoyl-phosphate synthase (glutamine hydrolyzing), aspartate carbamoyltransferase Ura1	multifunctional pyrimidine biosynthesis protein, (by homology)	None	None	None	None	None	Sce_HS-dw_2.0	None	None	None	None	None	Spo_XS-dw_2.0	None	Spo_Cd-dw_2.0	None	None	None	None	None	None	None	None	None	None	None	Cal_OS-dw_1.5	None	None	None	None	None	None	None	None
181.m08351	CNAG_00622	YOL140W	ARG8	SPCC777.09c	arg1	orf19.3770	None	None	KOG1401	E	Acetylornithine aminotransferase	acetylornithine transaminase	Acetylornithine aminotransferase, catalyzes the fourth step in the biosynthesis of the arginine precursor ornithine	acetylornithine aminotransferase	None	None	None	None	None	None	None	None	None	None	None	None	None	None	None	None	None	None	None	None	None	None	None	None	None	None	None	None	None	None	None	None	None	None	None
181.m08380	CNAG_00649	YGL026C	TRP5	SPAC19A8.15	trp2	orf19.4718	ca1580	TRP5	KOG1395	E	Tryptophan synthase beta chain	tryptophan synthase	Tryptophan synthase involved in tryptophan biosynthesis, regulated by the general control system of amino acid biosynthesis	tryptophan synthase (predicted)	tryptophan synthase (by homology)	None	None	Sce_XS-up_2.0	None	None	None	None	None	None	None	None	None	None	None	None	None	None	None	None	None	None	None	None	None	None	None	None	None	None	None	None	None	None	None
181.m08391	CNAG_00662	YDL086W	None	None	None	orf19.2966	ca4167	IPF7778	None	None	None	dienelactone hydrolase family protein	None	None	putative carboxymethylenebutenolidase (dienelactone hydrolase, DLH) (by homology)	None	None	None	None	None	None	None	None	None	None	None	None	None	None	None	None	None	None	None	None	None	None	None	None	None	None	None	None	Cal_XS-up_1.5	None	None	None	None	None
181.m08418	CNAG_00694	YLR117C	CLF1	SPBC31F10.11c	cwf4	orf19.332	ca3377	CLF1	KOG1915	D	Cell cycle control protein (crooked neck)	pre-mRNA-splicing factor CLF1	Essential splicesome assembly factor; contains multiple tetratricopeptide repeat (TPR) protein-binding motifs and interacts specifically with many spliceosome components, may serve as a scaffold during splicesome assembly	complexed with Cdc5 protein Cwf4	pre-mRNA splicing factor (by homology)	None	None	None	None	None	None	None	None	None	None	None	None	None	None	None	None	None	None	None	None	None	None	None	None	None	None	None	None	None	None	None	None	None	None
181.m08472	CNAG_00753	None	None	None	None	None	None	None	KOG0980	Z	Actin-binding protein SLA2/Huntingtin-interacting protein Hip1	conserved hypothetical protein	None	None	None	None	None	None	None	None	None	None	None	None	None	None	None	None	None	None	None	None	None	None	None	None	None	None	None	None	None	None	None	None	None	None	None	None	None
181.m08505	CNAG_00785	YKR059W	TIF1	SPAC1006.07	None	orf19.3324	ca2939	TIF1	KOG0327	J	Translation initiation factor 4F, helicase subunit (eIF-4A) and related helicases	translation initiation factor	Translation initiation factor eIF4A, identical to Tif2p; DEA(D/H)-box RNA helicase that couples ATPase activity to RNA binding and unwinding; forms a dumbbell structure of two compact domains connected by a linker; interacts with eIF4G	translation initiation factor eIF4A	translation initiation factor	None	None	Sce_XS-up_2.0	None	None	Sce_HS-dw_2.0	None	None	None	None	None	Spo_XS-dw_2.0	None	None	None	None	None	None	None	Cal_XS-dw	None	None	None	Cal_SSR.XS-dw	None	None	None	None	None	None	None	None	None	None
181.m08511	CNAG_02776	None	None	None	None	None	None	None	KOG4334	R	Uncharacterized conserved protein, contains double-stranded RNA-binding motif and WW domain	conserved hypothetical protein	None	None	None	None	None	None	None	None	None	None	None	None	None	None	None	None	None	None	None	None	None	None	None	None	None	None	None	None	None	None	None	None	None	None	None	None	None
181.m08514	CNAG_00793	YBR154C	RPB5	SPAC23C4.15	rpb5	orf19.6340	ca3494	RPB5	KOG3218	K	RNA polymerase, 25-kDa subunit (common to polymerases I, II and III)	DNA-directed RNA polymerase II 24 kda polypeptide	RNA polymerase subunit ABC27, common to RNA polymerases I, II, and III; contacts DNA and affects transactivation	DNA-directed RNA polymerase I, II and III subunit Rpb5	DNA-directed RNA polymerase I, II, III (by homology)	None	Sce_OS-dw_2.0	None	Sce_XS-dw_2.0	None	Sce_HS-dw_2.0	None	Sce_CSR-dw_2.0	None	None	None	None	None	None	None	None	None	None	None	None	None	None	None	None	None	None	None	None	None	None	None	None	None	None
181.m08526	CNAG_00807	None	None	None	None	None	None	None	KOG0800	O	FOG: Predicted E3 ubiquitin ligase	conserved hypothetical protein	None	None	None	None	None	None	None	None	None	None	None	None	None	None	None	None	None	None	None	None	None	None	None	None	None	None	None	None	None	None	None	None	None	None	None	None	None
181.m08530	CNAG_00811	YDR354W	TRP4	SPBC16G5.08	trp4	orf19.3099	ca4410	TRP4	KOG1438	E	Anthranilate phosphoribosyltransferase	anthranilate phosphoribosyltransferase	Anthranilate phosphoribosyl transferase of the tryptophan biosynthetic pathway, catalyzes the phosphoribosylation of anthranilate, subject to the general control system of amino acid biosynthesis	phosphoribosylanthranilate transferase Trp4	Anthranilate phosphoribosyltransferase	None	None	None	None	None	None	None	None	None	None	None	None	None	None	None	None	None	None	None	None	None	None	None	None	None	None	None	None	None	None	None	None	None	None
181.m08555	CNAG_00834	None	None	None	None	None	None	None	KOG2419	I	Phosphatidylserine decarboxylase	phosphatidylserine decarboxylase	None	None	None	None	None	None	None	None	None	None	None	None	None	None	None	None	None	None	None	None	None	None	None	None	None	None	None	None	None	None	None	None	None	None	None	None	None
181.m08570	CNAG_00848	None	None	None	None	None	None	None	KOG1808	R	AAA ATPase containing von Willebrand factor type A (vWA) domain	conserved hypothetical protein	None	None	None	None	None	None	None	None	None	None	None	None	None	None	None	None	None	None	None	None	None	None	None	None	None	None	None	None	None	None	None	None	None	None	None	None	None
181.m08571	CNAG_00850	None	None	None	None	None	None	None	KOG0950	R	DNA polymerase theta/eta, DEAD-box superfamily	plant-inducible protein	None	None	None	None	None	None	None	None	None	None	None	None	None	None	None	None	None	None	None	None	None	None	None	None	None	None	None	None	None	None	None	None	None	None	None	None	None
181.m08580	CNAG_00024	None	None	None	None	None	None	None	None	None	None	conserved hypothetical protein	None	None	None	None	None	None	None	None	None	None	None	None	None	None	None	None	None	None	None	None	None	None	None	None	None	None	None	None	None	None	None	None	None	None	None	None	None
181.m08582	CNAG_00036	YMR079W	SEC14	SPAC3H8.10	spo20	orf19.941	ca5398	SEC14	KOG1471	I	Phosphatidylinositol transfer protein SEC14 and related proteins	Sec14 cytosolic factor	Phosphatidylinositol/phosphatidylcholine transfer protein involved in coordinate regulation of PtdIns and PtdCho metabolism, products of which are regulators in Golgi to plasma membrane transport; functionally homologous to mammalian PITPs	sec14 cytosolic factor family Sec14	phosphatidylinositol(PI)/phosphatidylcholine(PC)transfer	None	None	None	None	None	Sce_HS-dw_2.0	None	None	None	None	None	None	None	None	None	None	None	None	None	None	None	None	None	None	None	None	None	None	None	None	None	None	None	None
181.m08606	CNAG_00410	None	None	SPBC16H5.12c	None	orf19.216	ca3032	IPF12319	None	None	None	conserved hypothetical protein	None	conserved fungal protein	unknown function	None	None	None	None	None	None	None	None	None	None	None	None	None	None	None	None	None	None	None	None	None	None	None	None	None	None	None	None	None	None	None	None	None	None
181.m08644	CNAG_00741	YDL084W	SUB2	SPAC17G6.14c	uap56	orf19.5647	None	None	KOG0329	A	ATP-dependent RNA helicase	ATP-dependent RNA helicase sub2	Component of the TREX complex required for nuclear mRNA export; member of the DEAD-box RNA helicase superfamily and is involved in early and late steps of spliceosome assembly; homolog of the human splicing factor hUAP56	ATP-dependent RNA helicase Uap56	None	None	None	None	None	None	None	None	None	None	None	None	None	None	None	None	None	None	None	None	None	None	None	None	None	None	None	None	None	None	None	None	None	None	None
181.m08688	CNAG_00074	YOR161C	PNS1	None	None	orf19.6077	ca4936	IPF8369	KOG1362	I	Choline transporter-like protein	integral to plasma membrane protein	Protein of unknown function; has similarity to Torpedo californica tCTL1p, which is postulated to be a choline transporter, neither null mutation nor overexpression affects choline transport	None	unknown function	Sce_OS-up_2.0	None	Sce_XS-up_2.0	None	Sce_HS-up_2.0	None	Sce_CSR-up_2.0	None	None	None	None	None	None	None	None	None	None	None	None	None	None	None	None	None	Cal_OS-up_1.5	None	Cal_OS-up_2.0	None	None	None	None	None	Cal_Cd-up_1.5	None
181.m08700	CNAG_00117	YNL280C	ERG24	SPBC16G5.18	erg24	orf19.1598	ca0300	ERG24	KOG1435	IT	Sterol reductase/lamin B receptor	C-14 sterol reductase	C-14 sterol reductase, acts in ergosterol biosynthesis; mutants accumulate the abnormal sterol ignosterol (ergosta-8,14 dienol), and are viable under anaerobic growth conditions but inviable on rich medium under aerobic conditions	C-14 sterol reductase Erg24	C-14 sterol reductase (by homology)	None	None	None	None	None	None	None	None	None	None	None	None	None	None	None	None	None	None	None	None	None	None	None	None	None	None	None	None	None	None	None	None	None	None
181.m08752	CNAG_00361	YDR388W	RVS167	SPBC21D10.12	hob1	orf19.1220	ca1531	RVS167	KOG3771	U	Amphiphysin	Hob1p	Actin-associated protein, subunit of a complex (Rvs161p-Rvs167p) involved in regulation of actin cytoskeleton, endocytosis, and viability following starvation or osmotic stress; homolog of mammalian amphiphysin	BAR adaptor protein Hob1	(putative) cytoskeletal protein (by homology)	None	None	None	None	None	None	None	None	None	None	None	None	None	None	None	None	None	None	None	None	None	None	None	None	None	None	None	None	None	None	None	None	None	None
181.m08843	CNAG_00017	None	None	None	None	None	None	None	KOG2294	K	Transcription factor of the Forkhead/HNF3 family	conserved hypothetical protein	None	None	None	None	None	None	None	None	None	None	None	None	None	None	None	None	None	None	None	None	None	None	None	None	None	None	None	None	None	None	None	None	None	None	None	None	None
183.m01587	CNAG_06267	None	None	SPAC343.12	rds1	None	None	None	None	None	None	Rds1 protein	None	conserved fungal protein	None	None	None	None	None	None	None	None	None	Spo_OS-up_2.0	None	Spo_XS-up_2.0	None	Spo_Cd-up_2.0	None	Spo_CESR-up	None	None	None	None	None	None	None	None	None	None	None	None	None	None	None	None	None	None	None
183.m01589	CNAG_07925	None	None	None	None	None	None	None	KOG4674	S	Uncharacterized conserved coiled-coil protein	conserved hypothetical protein	None	None	None	None	None	None	None	None	None	None	None	None	None	None	None	None	None	None	None	None	None	None	None	None	None	None	None	None	None	None	None	None	None	None	None	None	None
183.m01609	CNAG_06293	None	None	None	None	None	None	None	None	None	None	conserved hypothetical protein	None	None	None	None	None	None	None	None	None	None	None	None	None	None	None	None	None	None	None	None	None	None	None	None	None	None	None	None	None	None	None	None	None	None	None	None	None
183.m01613	CNAG_06297	None	None	None	None	None	None	None	None	None	None	conserved hypothetical protein	None	None	None	None	None	None	None	None	None	None	None	None	None	None	None	None	None	None	None	None	None	None	None	None	None	None	None	None	None	None	None	None	None	None	None	None	None
183.m01614	CNAG_06298	None	None	None	None	None	None	None	None	None	None	conserved hypothetical protein	None	None	None	None	None	None	None	None	None	None	None	None	None	None	None	None	None	None	None	None	None	None	None	None	None	None	None	None	None	None	None	None	None	None	None	None	None
183.m01618	CNAG_06308	None	None	SPAC1006.02	None	None	None	None	KOG0322	R	G-protein beta subunit-like protein GNB1L, contains WD repeats	WD repeat protein	None	WD repeat protein, human GNB1L family	None	None	None	None	None	None	None	None	None	None	None	None	None	None	None	None	None	None	None	None	None	None	None	None	None	None	None	None	None	None	None	None	None	None	None
183.m01648	CNAG_06347	None	None	None	None	None	None	None	KOG2283	TR	Clathrin coat dissociation kinase GAK/PTEN/Auxilin and related tyrosine phosphatases	conserved hypothetical protein	None	None	None	None	None	None	None	None	None	None	None	None	None	None	None	None	None	None	None	None	None	None	None	None	None	None	None	None	None	None	None	None	None	None	None	None	None
183.m01651	CNAG_06350	YBR271W	None	None	None	orf19.5808	ca4160	IPF9294	KOG2793	A	Putative N2,N2-dimethylguanosine tRNA methyltransferase	conserved hypothetical protein	None	None	unknown function	None	None	None	None	None	Sce_HS-dw_2.0	None	None	None	None	None	None	None	None	None	None	None	None	None	None	None	None	None	None	None	None	None	None	None	None	None	None	None	None
183.m01655	CNAG_06356	YKL027W	None	SPAC1A6.10	None	orf19.2115	ca2730	IPF10325	KOG2018	O	Predicted dinucleotide-utilizing enzyme involved in molybdopterin and thiamine biosynthesis	mitochondrial protein	None	Moeb/ThiF domain	molybdopterin-converting factor by homology	None	None	None	Sce_XS-dw_2.0	None	None	None	None	None	None	None	None	None	None	None	None	None	None	None	Cal_XS-dw	None	Cal_HS-dw	None	None	None	None	None	None	None	None	None	None	None	None
183.m01656	CNAG_06357	None	None	None	None	None	None	None	KOG4852	S	Uncharacterized conserved protein	conserved hypothetical protein	None	None	None	None	None	None	None	None	None	None	None	None	None	None	None	None	None	None	None	None	None	None	None	None	None	None	None	None	None	None	None	None	None	None	None	None	None
183.m01711	CNAG_06420	YBR291C	CTP1	SPAC19G12.05	None	orf19.5870	ca6166	CTP1.3f	KOG0756	C	Mitochondrial tricarboxylate/dicarboxylate carrier proteins	citrate transport protein	Mitochondrial inner membrane citrate transporter, member of the mitochondrial carrier family	mitochondrial citrate transporter	Citrate transport protein (by homology)	None	None	Sce_XS-up_2.0	None	None	Sce_HS-dw_2.0	None	None	None	None	None	None	None	Spo_Cd-dw_2.0	None	None	None	None	Cal_XS-up	None	None	None	Cal_SSR.XS-up	None	None	None	None	None	Cal_XS-up_1.5	None	None	None	None	None
183.m01782	CNAG_06484	None	None	None	None	None	None	None	KOG0613	Z	Projectin/twitchin and related proteins	conserved hypothetical protein	None	None	None	None	None	None	None	None	None	None	None	None	None	None	None	None	None	None	None	None	None	None	None	None	None	None	None	None	None	None	None	None	None	None	None	None	None
183.m01799	CNAG_06501	YMR307W	GAS1	SPAC19B12.02c	None	orf19.6081	ca3867	PHR2	None	None	None	1,3-beta-glucanosyltransferase	Beta-1,3-glucanosyltransferase, required for cell wall assembly; localizes to the cell surface via a glycosylphosphatidylinositol (GPI) anchor	1,3-beta-glucanosyltransferase (predicted)	pH-regulated protein 2	None	Sce_OS-dw_2.0	None	None	None	Sce_HS-dw_2.0	None	None	None	None	None	Spo_XS-dw_2.0	None	None	None	None	None	None	None	None	None	None	None	None	None	None	None	None	None	None	None	None	None	None
183.m01824	CNAG_06298	None	None	None	None	None	None	None	None	None	None	conserved hypothetical protein	None	None	None	None	None	None	None	None	None	None	None	None	None	None	None	None	None	None	None	None	None	None	None	None	None	None	None	None	None	None	None	None	None	None	None	None	None
183.m01849	CNAG_06327	YGL035C	MIG1	SPBC1D7.02c	scr1	orf19.4318	ca1593	MIG1	KOG1721	R	1 FOG: Zn-finger	DNA-binding protein cre-1	Transcription factor involved in glucose repression; sequence specific DNA binding protein containing two Cys2His2 zinc finger motifs; regulated by the SNF1 kinase and the GLC7 phosphatase	transcription factor Scr1	transcriptional regulator	None	None	None	None	None	None	None	None	None	None	None	None	None	None	None	None	None	None	None	None	None	None	None	None	None	None	None	None	None	None	None	None	None	None
183.m01871	CNAG_06336	YGR282C	BGL2	SPAC26H5.08c	bgl2	orf19.4668	ca2245	IPF7409	None	None	None	glucan 1,3 beta-glucosidase protein	Endo-beta-1,3-glucanase, major protein of the cell wall, involved in cell wall maintenance	glucan 1,3-beta-glucosidase Bgl2	unknown function	None	None	None	None	None	None	None	None	None	None	None	None	None	None	None	None	None	None	None	None	None	None	None	None	None	None	None	None	None	None	None	None	None	None
184.m04398	CNAG_05410	YBR105C	VID24	SPAC3H1.14	None	orf19.7445	ca5735	IPF2878	KOG4635	U	Vacuolar import and degradation protein	chromosome 17 open reading frame 39	Peripheral membrane protein located at Vid (vacuole import and degradation) vesicles; regulates fructose-1,6-bisphosphatase (FBPase) targeting to the vacuole; involved in proteasome-dependent catabolite degradation of FBPase	cytoplasmic vesicle protein, Vid24 family	unknown function	Sce_OS-up_2.0	None	None	None	Sce_HS-up_2.0	None	None	None	None	None	None	None	None	None	None	None	None	None	None	None	None	None	None	None	None	None	None	None	Cal_XS-up_1.5	None	None	None	None	None
184.m04411	CNAG_05424	None	None	None	None	None	None	None	None	None	None	conserved hypothetical protein	None	None	None	None	None	None	None	None	None	None	None	None	None	None	None	None	None	None	None	None	None	None	None	None	None	None	None	None	None	None	None	None	None	None	None	None	None
184.m04438	CNAG_05458	None	None	None	None	None	None	None	None	None	None	endo-1,3(4)-beta-glucanase	None	None	None	None	None	None	None	None	None	None	None	None	None	None	None	None	None	None	None	None	None	None	None	None	None	None	None	None	None	None	None	None	None	None	None	None	None
184.m04442	CNAG_05462	YKL150W	MCR1	None	None	orf19.3507	ca2457	MCR1	KOG0534	HC	NADH-cytochrome b-5 reductase	cytochrome-b5 reductase	Mitochondrial NADH-cytochrome b5 reductase, involved in ergosterol biosynthesis	None	NADH-cytochrome-b5 reductase (by homology)	Sce_OS-up_2.0	None	Sce_XS-up_2.0	None	Sce_HS-up_2.0	None	Sce_CSR-up_2.0	None	None	None	None	None	None	None	None	None	None	None	None	None	None	None	None	None	Cal_OS-up_1.5	None	Cal_OS-up_2.0	None	None	None	None	None	None	None
184.m04459	CNAG_05484	None	None	SPCC1919.01	ppk34	None	None	None	KOG0585	T	Ca2+/calmodulin-dependent protein kinase kinase beta and related serine/threonine protein kinases	other/CAMKK/Meta protein kinase	None	serine/threonine protein kinase Ppk34	None	None	None	None	None	None	None	None	None	None	None	None	None	None	None	None	None	None	None	None	None	None	None	None	None	None	None	None	None	None	None	None	None	None	None
184.m04532	CNAG_05552	YOR304W	ISW2	None	None	orf19.4437	ca4650	ISW1	KOG0385	K	Chromatin remodeling complex WSTF-ISWI, small subunit	transcription activator snf2l1	Member of the imitation-switch (ISWI) class of ATP-dependent chromatin remodeling complexes; ATPase component that, with Itc1p, forms a complex required for repression of a-specific genes, INO1, and early meiotic genes during mitotic growth	None	ATPase component of a four subunit chromatin remodeling complex, (by homology)	None	None	None	None	None	None	None	None	None	None	None	None	None	None	None	None	None	None	None	None	None	None	None	None	None	None	None	None	None	None	None	None	None	None
184.m04671	CNAG_05294	None	None	None	None	None	None	None	KOG0274	R	Cdc4 and related F-box and WD-40 proteins	ubiquitin-protein ligase	None	None	None	None	None	None	None	None	None	None	None	None	None	None	None	None	None	None	None	None	None	None	None	None	None	None	None	None	None	None	None	None	None	None	None	None	None
184.m04683	CNAG_05279	None	None	None	None	None	None	None	KOG2135	R	Proteins containing the RNA recognition motif	conserved hypothetical protein	None	None	None	None	None	None	None	None	None	None	None	None	None	None	None	None	None	None	None	None	None	None	None	None	None	None	None	None	None	None	None	None	None	None	None	None	None
184.m04685	CNAG_05277	YOR327C	SNC2	SPAC6G9.11	syb1	orf19.5006.1	None	None	KOG0860	U	Synaptobrevin/VAMP-like protein	V-SNARE	Vesicle membrane receptor protein (v-SNARE) involved in the fusion between Golgi-derived secretory vesicles with the plasma membrane; member of the synaptobrevin/VAMP family of R-type v-SNARE proteins	SNAP receptor, synaptobrevin family	None	None	Sce_OS-dw_2.0	None	None	None	None	None	None	None	None	None	None	None	None	None	None	None	None	None	None	None	None	None	None	None	None	None	None	None	None	None	None	None	None
184.m04689	CNAG_05274	None	None	SPAC9G1.09	sid1	orf19.3456	ca0719	IPF9779.5	KOG0201	T	Serine/threonine protein kinase	STE/STE20/YSK protein kinase	None	PAK-related kinase Sid1	serine/threonine protein kinase, 5-prime end (by homology)	None	None	None	None	None	None	None	None	None	None	None	None	None	None	None	None	None	None	None	None	None	None	None	None	None	None	None	None	None	None	None	None	None	None
184.m04710	CNAG_05253	None	None	None	None	None	None	None	None	None	None	conserved hypothetical protein	None	None	None	None	None	None	None	None	None	None	None	None	None	None	None	None	None	None	None	None	None	None	None	None	None	None	None	None	None	None	None	None	None	None	None	None	None
184.m04716	CNAG_05247	YDL052C	SLC1	SPAC1851.02	None	orf19.250	ca0829	SLC1	KOG2848	I	1-acyl-sn-glycerol-3-phosphate acyltransferase	1-acylglycerol-3-phosphate O-acyltransferase	1-acyl-sn-gylcerol-3-phosphate acyltransferase, catalyzes the acylation of lysophosphatidic acid to form phosphatidic acid, a key intermediate in lipid metabolism; located in lipid particles and endoplasmic reticulum	1-acylglycerol-3-phosphate O-acyltransferase (predicted)	fatty acyltransferase (by homology)	None	None	None	None	Sce_HS-up_2.0	None	None	None	None	None	None	None	None	None	None	None	None	None	None	None	None	None	None	None	None	None	None	None	None	None	None	None	None	None
184.m04733	CNAG_05227	None	None	None	None	None	None	None	KOG0134	CR	NADH:flavin oxidoreductase/12-oxophytodienoate reductase	conserved hypothetical protein	None	None	None	None	None	None	None	None	None	None	None	None	None	None	None	None	None	None	None	None	None	None	None	None	None	None	None	None	None	None	None	None	None	None	None	None	None
184.m04766	CNAG_05190	None	None	None	None	None	None	None	KOG2417	T	Predicted G-protein coupled receptor	conserved hypothetical protein	None	None	None	None	None	None	None	None	None	None	None	None	None	None	None	None	None	None	None	None	None	None	None	None	None	None	None	None	None	None	None	None	None	None	None	None	None
184.m04802	CNAG_05144	YNL036W	NCE103	None	None	orf19.1721	ca2796	IPF8405	KOG1578	P	Predicted carbonic anhydrase involved in protection against oxidative damage	carbonic anhydrase 2	Carbonic anhydrase; poorly transcribed under aerobic conditions and at an undetectable level under anaerobic conditions; involved in non-classical protein export pathway	None	similar to Saccharomyces cerevisiae Nce103p involved in non-classical protein export pathway (by homology)	Sce_OS-up_2.0	None	Sce_XS-up_2.0	None	Sce_HS-up_2.0	None	Sce_CSR-up_2.0	None	None	None	None	None	None	None	None	None	None	None	None	None	None	None	None	None	None	Cal_OS-dw_1.5	None	None	None	Cal_XS-dw_1.5	None	None	None	None
184.m04844	CNAG_05100	YJR125C	ENT3	SPCC794.11c	None	orf19.1553	ca3979	ENT3.3f	KOG2056	F	Equilibrative nucleoside transporter protein	ENTH domain-containing protein c	Protein containing an N-terminal epsin-like domain involved in clathrin recruitment and traffic between the Golgi and endosomes; associates with the clathrin adaptor Gga2p	ENTH domain protein Ent3	putative endocytosis and cytoskeleton protein, 3-prime end (by homology)	None	None	None	None	Sce_HS-up_2.0	None	None	None	None	None	None	None	None	None	None	None	None	None	None	None	None	None	None	None	None	None	None	None	None	None	None	None	None	None
184.m04847	CNAG_05097	YKL151C	None	SPCC61.03	None	orf19.3508	ca2458	IPF12233	KOG3974	G	Predicted sugar kinase	cytoplasmic protein	None	UPF0031 family protein	unknown function	None	None	None	None	Sce_HS-up_2.0	None	None	None	Spo_OS-up_2.0	None	Spo_XS-up_2.0	None	Spo_Cd-up_2.0	None	Spo_CESR-up	None	Cal_OS-up	None	None	None	None	None	Cal_SSR.OS-up	None	Cal_OS-up_1.5	None	None	None	None	None	None	None	None	None
184.m05003	CNAG_05424	None	None	None	None	None	None	None	None	None	None	conserved hypothetical protein	None	None	None	None	None	None	None	None	None	None	None	None	None	None	None	None	None	None	None	None	None	None	None	None	None	None	None	None	None	None	None	None	None	None	None	None	None
184.m05069	CNAG_05470	YOL075C	None	None	None	orf19.4531	ca4190	IPF7530	KOG0065	Q	Pleiotropic drug resistance proteins (PDR1-15), ABC superfamily	ABC transporter family protein	None	None	ATP-binding-cassette protein (by homology to A.gambiae)	None	None	None	None	Sce_HS-up_2.0	None	None	None	None	None	None	None	None	None	None	None	None	None	None	None	None	None	None	None	None	Cal_OS-dw_1.5	None	Cal_OS-dw_2.0	Cal_XS-up_1.5	None	None	None	None	Cal_Cd-dw_1.5
184.m05098	CNAG_05548	None	None	None	None	None	None	None	KOG1840	Z	Kinesin light chain	conserved hypothetical protein	None	None	None	None	None	None	None	None	None	None	None	None	None	None	None	None	None	None	None	None	None	None	None	None	None	None	None	None	None	None	None	None	None	None	None	None	None
184.m05127	CNAG_05289	None	None	None	None	None	None	None	None	None	None	conserved hypothetical protein	None	None	None	None	None	None	None	None	None	None	None	None	None	None	None	None	None	None	None	None	None	None	None	None	None	None	None	None	None	None	None	None	None	None	None	None	None
185.m02369	CNAG_04583	YGL133W	ITC1	None	None	orf19.5510	ca2515	IPF19759	KOG1245	B	Chromatin remodeling complex WSTF-ISWI, large subunit (contains heterochromatin localization, PHD and BROMO domains)	conserved hypothetical protein	Component of the ATP-dependent Isw2p-Itc1p chromatin remodeling complex, required for repression of a-specific genes, repression of early meiotic genes during mitotic growth, and repression of INO1	None	Unknown Function	None	None	None	None	None	None	None	None	None	None	None	None	None	None	None	None	None	None	None	None	None	None	None	None	None	None	None	None	None	Cal_XS-dw_1.5	None	None	None	None
185.m02410	CNAG_04627	YJR084W	CSN12	SPAC1B3.08	None	orf19.3945	ca1089	IPF13799	KOG2688	D	Transcription-associated recombination protein - Thp1p	COP9 signalosome complex subunit 12	Subunit of the Cop9 signalosome, which is required for deneddylation, or removal of the ubiquitin-like protein Rub1p from Cdc53p (cullin); involved in adaptation to pheromone signaling	COP9 signalosome complex subunit 12 (predicted)	unknown function	None	None	None	None	None	None	None	None	None	None	Spo_XS-up_2.0	None	None	None	None	None	None	None	None	None	None	None	None	None	None	None	None	None	None	None	None	None	None	None
185.m02413	CNAG_04630	None	None	None	None	None	None	None	None	None	None	conserved hypothetical protein	None	None	None	None	None	None	None	None	None	None	None	None	None	None	None	None	None	None	None	None	None	None	None	None	None	None	None	None	None	None	None	None	None	None	None	None	None
185.m02417	CNAG_04634	None	None	None	None	None	None	None	KOG1216	WV	von Willebrand factor and related coagulation proteins	conserved hypothetical protein	None	None	None	None	None	None	None	None	None	None	None	None	None	None	None	None	None	None	None	None	None	None	None	None	None	None	None	None	None	None	None	None	None	None	None	None	None
185.m02447	CNAG_04666	YGL048C	RPT6	SPBC23G7.12c	rpt6	orf19.3593	ca0155	RPT6	KOG0728	O	26S proteasome regulatory complex, ATPase RPT6	endopeptidase	One of six ATPases of the 19S regulatory particle of the 26S proteasome involved in the degradation of ubiquitinated substrates; bound by ubiquitin-protein ligases Ubr1p and Ufd4p; localized mainly to the nucleus throughout the cell cycle	19S proteasome regulatory subunit Rpt6 (predicted)	26S proteasome regulatory subunit (by homology)	Sce_OS-up_2.0	None	Sce_XS-up_2.0	None	None	None	None	None	None	None	None	None	None	None	None	None	None	None	None	None	None	None	None	None	None	None	None	None	None	None	None	None	None	None
185.m02448	CNAG_04667	None	None	SPAC4H3.13	None	None	None	None	None	None	None	conserved hypothetical protein	None	transcription factor Pcc1 (predicted)	None	None	None	None	None	None	None	None	None	None	None	None	None	None	None	None	None	None	None	None	None	None	None	None	None	None	None	None	None	None	None	None	None	None	None
185.m02456	CNAG_04677	None	None	None	None	None	None	None	KOG0024	Q	Sorbitol dehydrogenase	xylitol dehydrogenase	None	None	None	None	None	None	None	None	None	None	None	None	None	None	None	None	None	None	None	None	None	None	None	None	None	None	None	None	None	None	None	None	None	None	None	None	None
185.m02492	CNAG_04714	None	None	SPAC11D3.05	None	None	None	None	KOG0255	R	Synaptic vesicle transporter SVOP and related transporters (major facilitator superfamily)	MFS multidrug transporter protein	None	membrane transporter (predicted)	None	None	None	None	None	None	None	None	None	Spo_OS-up_2.0	None	Spo_XS-up_2.0	None	None	None	None	None	None	None	None	None	None	None	None	None	None	None	None	None	None	None	None	None	None	None
185.m02493	CNAG_04715	YJL002C	OST1	SPAC27F1.07	None	orf19.6988	ca5034	OST1	KOG2291	O	Oligosaccharyltransferase, alpha subunit (ribophorin I)	oligosaccharyltransferase alpha subunit	Alpha subunit of the oligosaccharyltransferase complex of the ER lumen, which catalyzes asparagine-linked glycosylation of newly synthesized proteins	dolichyl-diphospho-oligosaccharide-protein glycosyltransferase (predicted)	oligosaccharyltransferase	None	None	None	None	None	None	None	None	None	None	None	None	None	None	None	None	None	None	None	None	None	None	None	None	None	None	None	None	None	None	None	None	None	None
185.m02511	CNAG_04737	None	None	SPBC1604.01	mug158	None	None	None	None	None	None	DUF323 domain-containing protein	None	sulfatase modifying factor 1 related	None	None	None	None	None	None	None	None	None	None	None	Spo_XS-up_2.0	None	Spo_Cd-up_2.0	None	None	None	None	None	None	None	None	None	None	None	None	None	None	None	None	None	None	None	None	None
185.m02517	CNAG_04744	None	None	None	None	None	None	None	KOG2757	G	Mannose-6-phosphate isomerase	mannose-6-phosphate isomerase	None	None	None	None	None	None	None	None	None	None	None	None	None	None	None	None	None	None	None	None	None	None	None	None	None	None	None	None	None	None	None	None	None	None	None	None	None
185.m02529	CNAG_04755	YJL095W	BCK1	SPAC1F3.02c	mkh1	orf19.5162	ca4433	BCK1	KOG0198	T	MEKK and related serine/threonine protein kinases	STE/STE11 protein kinase	Mitogen-activated protein (MAP) kinase kinase kinase acting in the protein kinase C signaling pathway, which controls cell integrity; upon activation by Pkc1p phosphorylates downstream kinases Mkk1p and Mkk2p	MEK kinase (MEKK) Mkh1	serine/threonine protein kinase of the MEKK family (by homology)	None	None	None	None	None	None	None	None	None	None	Spo_XS-up_2.0	None	None	None	None	None	None	None	None	None	None	None	None	None	None	None	None	None	None	None	None	None	None	None
185.m02578	CNAG_04804	None	None	None	None	None	None	None	KOG2588	K	Predicted DNA-binding protein	conserved hypothetical protein	None	None	None	None	None	None	None	None	None	None	None	None	None	None	None	None	None	None	None	None	None	None	None	None	None	None	None	None	None	None	None	None	None	None	None	None	None
185.m02588	CNAG_04818	YOL119C	MCH4	None	None	orf19.6263	ca3686	IPF4890	None	None	None	conserved hypothetical protein	Protein with similarity to mammalian monocarboxylate permeases, which are involved in transport of monocarboxylic acids across the plasma membrane; mutant is not deficient in monocarboxylate transport	None	unknown function	Sce_OS-up_2.0	None	Sce_XS-up_2.0	None	Sce_HS-up_2.0	Sce_HS-dw_2.0	Sce_CSR-up_2.0	None	None	None	None	None	None	None	None	None	None	None	None	None	None	None	None	None	None	None	None	None	None	None	None	None	None	None
185.m02607	CNAG_04837	None	None	None	None	orf19.2315	ca3300	RTG3	KOG1318	K	Helix loop helix transcription factor EB	conserved hypothetical protein	None	None	Probable bHLH/zip transcription factor that regulates CIT2 gene expression (by homology)	None	None	None	None	None	None	None	None	None	None	None	None	None	None	None	None	None	None	None	None	None	None	None	None	None	None	None	None	None	None	None	None	None	None
185.m02668	CNAG_04891	None	None	None	None	None	None	None	KOG3736	O	Polypeptide N-acetylgalactosaminyltransferase	conserved hypothetical protein	None	None	None	None	None	None	None	None	None	None	None	None	None	None	None	None	None	None	None	None	None	None	None	None	None	None	None	None	None	None	None	None	None	None	None	None	None
185.m02669	CNAG_04892	None	None	None	None	None	None	None	None	None	None	conserved hypothetical protein	None	None	None	None	None	None	None	None	None	None	None	None	None	None	None	None	None	None	None	None	None	None	None	None	None	None	None	None	None	None	None	None	None	None	None	None	None
185.m02675	CNAG_04897	None	None	None	None	None	None	None	KOG1158	C	NADP/FAD dependent oxidoreductase	conserved hypothetical protein	None	None	None	None	None	None	None	None	None	None	None	None	None	None	None	None	None	None	None	None	None	None	None	None	None	None	None	None	None	None	None	None	None	None	None	None	None
185.m02680	CNAG_04902	YLR207W	HRD3	SPAC1B3.10c	None	orf19.1191	ca2651	HRD3	KOG1550	MOT	Extracellular protein SEL-1 and related proteins	MMS2	Resident protein of the ER membrane that plays a central role in ER-associated protein degradation (ERAD), forms HRD complex with Hrd1p and ERAD determinants that engages in lumen to cytosol communication and coordination of ERAD events	SEL1 repeat protein, unknown biological role	involved in HMG-CoA reductase degradation (by homology)	None	None	None	None	None	None	None	None	None	None	None	None	None	None	None	None	None	None	None	None	None	None	None	None	Cal_OS-up_1.5	None	None	None	None	None	None	None	None	None
185.m02681	CNAG_04903	None	None	None	None	None	None	None	KOG1808	R	AAA ATPase containing von Willebrand factor type A (vWA) domain	conserved hypothetical protein	None	None	None	None	None	None	None	None	None	None	None	None	None	None	None	None	None	None	None	None	None	None	None	None	None	None	None	None	None	None	None	None	None	None	None	None	None
185.m02732	None	None	None	None	None	None	None	None	None	None	None	None	None	None	None	None	None	None	None	None	None	None	None	None	None	None	None	None	None	None	None	None	None	None	None	None	None	None	None	None	None	None	None	None	None	None	None	None	None
185.m02735	None	None	None	None	None	None	None	None	None	None	None	None	None	None	None	None	None	None	None	None	None	None	None	None	None	None	None	None	None	None	None	None	None	None	None	None	None	None	None	None	None	None	None	None	None	None	None	None	None
185.m02738	CNAG_04702	None	None	None	None	None	None	None	KOG4522	K	RNA polymerase II transcription mediator	conserved hypothetical protein	None	None	None	None	None	None	None	None	None	None	None	None	None	None	None	None	None	None	None	None	None	None	None	None	None	None	None	None	None	None	None	None	None	None	None	None	None
186.m03453	CNAG_06760	None	None	SPBC1105.15c	htd2	orf19.2670	ca3329	IPF12162	None	None	None	conserved hypothetical protein	None	3-hydroxyacyl-ACP dehydratase Htd2 (predicted)	Unknown function	None	None	None	None	None	None	None	None	None	None	None	None	None	None	None	None	None	None	None	None	Cal_HS-up	None	Cal_SSR.HS-up	None	None	None	None	None	Cal_XS-up_1.5	None	Cal_XS-up_2.0	None	None	None
186.m03496	CNAG_07465	None	None	None	None	None	None	None	KOG4168	K	Predicted RNA polymerase III subunit C17	conserved hypothetical protein	None	None	None	None	None	None	None	None	None	None	None	None	None	None	None	None	None	None	None	None	None	None	None	None	None	None	None	None	None	None	None	None	None	None	None	None	None
186.m03531	CNAG_03609	None	None	None	None	None	None	None	KOG3600	K	Thyroid hormone receptor-associated protein complex, subunit TRAP240	conserved hypothetical protein	None	None	None	None	None	None	None	None	None	None	None	None	None	None	None	None	None	None	None	None	None	None	None	None	None	None	None	None	None	None	None	None	None	None	None	None	None
186.m03536	CNAG_07470	YOR360C	PDE2	None	None	orf19.2972	ca3450	PDE2	KOG3689	T	Cyclic nucleotide phosphodiesterase	high-affinity phosphodiesterase	High-affinity cyclic AMP phosphodiesterase, component of the cAMP-dependent protein kinase signaling system, protects the cell from extracellular cAMP, contains readthrough motif surrounding termination codon	None	Nucleotide phosphodiesterase	None	None	None	None	None	None	None	None	None	None	None	None	None	None	None	None	None	None	None	None	None	None	None	None	None	None	None	None	Cal_XS-up_1.5	None	Cal_XS-up_2.0	None	None	None
186.m03566	CNAG_03644	None	None	None	None	None	None	None	None	None	None	CAS3p	None	None	None	None	None	None	None	None	None	None	None	None	None	None	None	None	None	None	None	None	None	None	None	None	None	None	None	None	None	None	None	None	None	None	None	None	None
186.m03600	CNAG_03677	None	None	None	None	None	None	None	None	None	None	conserved hypothetical protein	None	None	None	None	None	None	None	None	None	None	None	None	None	None	None	None	None	None	None	None	None	None	None	None	None	None	None	None	None	None	None	None	None	None	None	None	None
186.m03607	CNAG_03687	None	None	None	None	None	None	None	None	None	None	conserved hypothetical protein	None	None	None	None	None	None	None	None	None	None	None	None	None	None	None	None	None	None	None	None	None	None	None	None	None	None	None	None	None	None	None	None	None	None	None	None	None
186.m03645	None	None	None	None	None	None	None	None	None	None	None	None	None	None	None	None	None	None	None	None	None	None	None	None	None	None	None	None	None	None	None	None	None	None	None	None	None	None	None	None	None	None	None	None	None	None	None	None	None
186.m03656	CNAG_03729	None	None	None	None	None	None	None	KOG1125	R	TPR repeat-containing protein	peroxisome targeting sequence binding protein	None	None	None	None	None	None	None	None	None	None	None	None	None	None	None	None	None	None	None	None	None	None	None	None	None	None	None	None	None	None	None	None	None	None	None	None	None
186.m03661	None	None	None	None	None	None	None	None	None	None	None	None	None	None	None	None	None	None	None	None	None	None	None	None	None	None	None	None	None	None	None	None	None	None	None	None	None	None	None	None	None	None	None	None	None	None	None	None	None
186.m03677	None	None	None	None	None	None	None	None	None	None	None	None	None	None	None	None	None	None	None	None	None	None	None	None	None	None	None	None	None	None	None	None	None	None	None	None	None	None	None	None	None	None	None	None	None	None	None	None	None
186.m03689	CNAG_03771	None	None	None	None	None	None	None	KOG1216	WV	von Willebrand factor and related coagulation proteins	DNA binding protein Ncp1	None	None	None	None	None	None	None	None	None	None	None	None	None	None	None	None	None	None	None	None	None	None	None	None	None	None	None	None	None	None	None	None	None	None	None	None	None
186.m03756	CNAG_03832	YOR099W	KTR1	SPBC19C7.12c	None	orf19.1665	ca3469	MNT1	KOG4472	G	Glycolipid 2-alpha-mannosyltransferase (alpha-1,2-mannosyltransferase)	alpha-1,2-mannosyltransferase	Alpha-1,2-mannosyltransferase involved in O- and N-linked protein glycosylation; type II membrane protein; member of the KRE2/MNT1 mannosyltransferase family	alpha-1,2-mannosyltransferase (predicted)	Mannosyltransferase involved in n-linked and o-linked glycosylation	None	None	None	None	None	None	None	None	None	None	None	None	None	None	None	None	None	None	None	None	None	None	None	None	None	None	None	None	None	Cal_XS-dw_1.5	None	None	None	None
186.m03772	CNAG_03847	None	None	None	None	None	None	None	None	None	None	conserved hypothetical protein	None	None	None	None	None	None	None	None	None	None	None	None	None	None	None	None	None	None	None	None	None	None	None	None	None	None	None	None	None	None	None	None	None	None	None	None	None
186.m03790	CNAG_03857	None	None	None	None	None	None	None	KOG1075	R	FOG: Reverse transcriptase	hypothetical protein	None	None	None	None	None	None	None	None	None	None	None	None	None	None	None	None	None	None	None	None	None	None	None	None	None	None	None	None	None	None	None	None	None	None	None	None	None
186.m03804	CNAG_03872	None	None	SPAC23G3.08c	ubp7	None	None	None	KOG1873	O	Ubiquitin-specific protease	conserved hypothetical protein	None	ubiquitin C-terminal hydrolase Ubp7 (predicted)	None	None	None	None	None	None	None	None	None	None	None	None	None	None	None	None	None	None	None	None	None	None	None	None	None	None	None	None	None	None	None	None	None	None	None
186.m03805	CNAG_03873	None	None	None	None	None	None	None	None	None	None	conserved hypothetical protein	None	None	None	None	None	None	None	None	None	None	None	None	None	None	None	None	None	None	None	None	None	None	None	None	None	None	None	None	None	None	None	None	None	None	None	None	None
186.m03810	CNAG_03878	None	None	SPBC83.15	None	orf19.2185	ca1770	IPF12457	KOG3881	S	Uncharacterized conserved protein	conserved hypothetical protein	None	ribosome biogenesis protein Nsa1	unknown function	None	None	None	None	None	None	None	None	None	None	None	Spo_XS-dw_2.0	None	Spo_Cd-dw_2.0	None	Spo_CESR-dw	None	Cal_OS-dw	None	None	None	Cal_HS-dw	None	None	None	None	None	None	None	Cal_XS-dw_1.5	None	Cal_XS-dw_2.0	None	None
186.m03829	CNAG_03901	YPL060W	LPE10	SPBC25H2.08c	mrs2	orf19.2597	ca2271	MRS2	KOG2662	P	Magnesium transporters: CorA family	magnesium ion transporter	Mitochondrial inner membrane magnesium transporter, involved in maintenance of magnesium concentrations inside mitochondria; indirectly affects splicing of group II introns; functionally and structurally related to Mrs2p	magnesium ion transporter Mrs2	Mitochondrial RNA splicing protein (by homology)	Sce_OS-up_2.0	None	Sce_XS-up_2.0	None	Sce_HS-up_2.0	None	Sce_CSR-up_2.0	None	None	None	None	Spo_XS-dw_2.0	None	None	None	None	None	None	None	None	None	None	None	None	None	None	None	None	None	None	None	None	None	None
186.m03851	CNAG_03923	YDR386W	MUS81	SPCC4G3.05c	mus81	orf19.4206	ca2929	IPF7838	KOG2379	L	Endonuclease MUS81	endonuclease	Helix-hairpin-helix protein, involved in DNA repair and replication fork stability; functions as an endonuclease in complex with Mms4p; interacts with Rad54p	Holliday junction resolvase subunit Mus81	similar to Saccharomyces cerevisiae Mus81p involved in DNA repair, interacts with Rad54p (by homology)	None	None	None	None	None	None	None	None	None	None	None	None	None	None	None	None	None	None	None	None	None	None	None	None	None	None	None	None	None	None	None	None	None	None
186.m03875	CNAG_03951	None	None	None	None	None	None	None	None	None	None	conserved hypothetical protein	None	None	None	None	None	None	None	None	None	None	None	None	None	None	None	None	None	None	None	None	None	None	None	None	None	None	None	None	None	None	None	None	None	None	None	None	None
186.m03943	CNAG_04017	YCL033C	None	SPBC216.04c	None	orf19.3292	ca4602	IPF6231	KOG0856	O	Predicted pilin-like transcription factor	protein-methionine-R-oxide reductase	None	methionine sulfoxide (predicted)	unknown function Unknown function	None	None	None	Sce_XS-dw_2.0	None	None	None	None	None	None	Spo_XS-up_2.0	None	None	None	None	None	Cal_OS-up	None	None	None	None	None	Cal_SSR.OS-up	None	None	None	None	None	None	None	None	None	None	None
186.m03970	CNAG_04040	YNR047W	None	SPAC4G8.05	ppk14	orf19.223	ca3029	IPF13825	KOG0610	R	Putative serine/threonine protein kinase	AGC/RSK protein kinase	None	serine/threonine protein kinase Ppk14 (predicted)	serine/threonine protein kinases (by homology)	None	None	Sce_XS-up_2.0	None	Sce_HS-up_2.0	None	None	None	None	None	None	None	None	None	None	None	None	None	None	None	None	None	None	None	None	None	None	None	Cal_XS-up_1.5	None	Cal_XS-up_2.0	None	None	None
186.m04013	CNAG_04090	None	None	SPBC29B5.01	atf1	orf19.1032	ca1627	SKO1.3f	KOG1414	K	Transcriptional activator FOSB/c-Fos and related bZIP transcription factors	activating transcription factor 2	None	transcription factor Atf1	Cre-binding bzip protein, 3-prime end (by homology)	None	None	None	None	None	None	None	None	Spo_OS-up_2.0	None	Spo_XS-up_2.0	None	Spo_Cd-up_2.0	None	Spo_CESR-up	None	None	None	None	None	None	None	None	None	Cal_OS-up_1.5	None	None	None	None	None	None	None	None	None
186.m04029	None	None	None	None	None	None	None	None	None	None	None	None	None	None	None	None	None	None	None	None	None	None	None	None	None	None	None	None	None	None	None	None	None	None	None	None	None	None	None	None	None	None	None	None	None	None	None	None	None
186.m04054	CNAG_03813	None	None	SPCC23B6.05c	ssb3	None	None	None	None	None	None	single-stranded DNA binding protein 12k chain	None	DNA replication factor A subunit Ssb3	None	None	None	None	None	None	None	None	None	None	None	None	None	None	None	None	None	None	None	None	None	None	None	None	None	None	None	None	None	None	None	None	None	None	None
[truncated: 16 more columns]

## Sheet: H99 CAN2 BCS zero-transform
Gene ID/ name									Biological function							Stress Response Genes of S. cerevisiae								Stress Response Genes of S. pombe								Stress Response Genes of C. albicans (Enjalbert et al., 2003)								Stress Response Genes of C. albicans (Enjalbert et al., 2006)
C.neo (JEC21) ID	C.neo (H99) ID	Sce ID	Sce_Gene (SGD)	Spo ID	Spo_Gene (GeneDB)	Cal ID (SGTC)	Cal ID (CYGD)	Cal_Gene (CandiaDB)	KOGs ID	KOGs Catagory	KOGs Description	Cn.H99.v2 Description	Sce_Description (SGD)	Spo_Description (GeneDB)	Cal_Description (CandiaDB)	Sce_OS-up_2.0 (Gasch-00)	Sce_OS-dw_2.0 (Gasch-00)	Sce_XS-up_2.0 (Gasch-00)	Sce_XS-dw_2.0 (Gasch-00)	Sce_HS-up_2.0 (Gasch-00)	Sce_HS-dw_2.0 (Gasch-00)	Sce_SSR-up_2.0 (Gasch-00, Re-exam)	Sce_SSR-dw_2.0 (Gasch-00, Re-exam)	Spo_OS-up_2.0 (Chen-03)	Spo_OS-dw_2.0 (Chen-03)	Spo_XS-up_2.0 (Chen-03)	Spo_XS-dw_2.0 (Chen-03)	Spo_Cd-up_2.0 (Chen-03)	Spo_Cd-dw_2.0 (Chen-03)	Spo_SSR-up_2.0 (Chen-03)	Spo_SSR-dw_2.0 (Chen-03)	Cal_OS-up (Enjalbert-03)	Cal_OS-dw (Enjalbert-03)	Cal_XS-up (Enjalbert-03)	Cal_XS-dw (Enjalbert-03)	Cal_HS-up (Enjalbert-03)	Cal_HS-dw (Enjalbert-03)	Cal_SSR-up (Enjalbert-03)	Cal_SSR-dw (Enjalbert-03)	Cal_OS-up_1.5 (Enjalbert-06)	Cal_OS-dw_1.5 (Enjalbert-06)	Cal_OS-up_2.0 (Enjalbert-06)	Cal_OS-dw_2.0 (Enjalbert-06)	Cal_XS-up_1.5 (Enjalbert-06)	Cal_XS-dw_1.5 (Enjalbert-06)	Cal_XS-up_2.0 (Enjalbert-06)	Cal_XS-dw_2.0 (Enjalbert-06)	Cal_Cd-up_1.5 (Enjalbert-06)	Cal_Cd-dw_1.5 (Enjalbert-06)
162.m02116	CNAG_04106	None	None	None	None	None	None	None	KOG0499	PT	Cyclic nucleotide-gated cation channel CNCG4	conserved hypothetical protein	None	None	None	None	None	None	None	None	None	None	None	None	None	None	None	None	None	None	None	None	None	None	None	None	None	None	None	None	None	None	None	None	None	None	None	None	None
162.m02222	CNAG_04193	None	None	None	None	None	None	None	None	None	None	conserved hypothetical protein	None	None	None	None	None	None	None	None	None	None	None	None	None	None	None	None	None	None	None	None	None	None	None	None	None	None	None	None	None	None	None	None	None	None	None	None	None
162.m02517	CNAG_07772	None	None	None	None	None	None	None	KOG3525	O	Subtilisin-like proprotein convertase	conserved hypothetical protein	None	None	None	None	None	None	None	None	None	None	None	None	None	None	None	None	None	None	None	None	None	None	None	None	None	None	None	None	None	None	None	None	None	None	None	None	None
162.m02596	None	None	None	None	None	None	None	None	None	None	None	None	None	None	None	None	None	None	None	None	None	None	None	None	None	None	None	None	None	None	None	None	None	None	None	None	None	None	None	None	None	None	None	None	None	None	None	None	None
162.m02604	None	None	None	None	None	None	None	None	None	None	None	None	None	None	None	None	None	None	None	None	None	None	None	None	None	None	None	None	None	None	None	None	None	None	None	None	None	None	None	None	None	None	None	None	None	None	None	None	None
162.m02617	CNAG_04539	YGR112W	SHY1	SPBC1215.01	shy1	orf19.4841	ca4742	SHY1	KOG1563	C	Mitochondrial protein Surfeit 1/SURF1/SHY1, required for expression of cytochrome oxidase	mitochondrial protein required for respiration	Mitochondrial inner membrane protein required for assembly of cytochrome c oxidase (complex IV); associates with complex IV assembly intermediates and complex III/complex IV supercomplexes; similar to human SURF1 involved in Leigh Syndrome	SURF-family protein Shy1	SURF homologue protein (by homology)	None	None	None	None	Sce_HS-up_2.0	None	None	None	None	None	None	None	None	None	None	None	None	None	None	None	None	None	None	None	None	None	None	None	None	None	None	None	None	None
162.m02620	CNAG_07780	YPL069C	BTS1	None	None	orf19.6674	ca4277	BTS1	None	None	None	farnesyltranstransferase	Geranylgeranyl diphosphate synthase, increases the intracellular pool of geranylgeranyl diphosphate, suppressor of bet2 mutation that causes defective geranylgeranylation of small GTP-binding proteins that mediate vesicular traffic	None	Geranylgeranyl diphosphate synthase (by homology)	None	None	None	None	None	None	None	None	None	None	None	None	None	None	None	None	None	Cal_OS-dw	None	None	None	Cal_HS-dw	None	None	None	None	None	None	None	None	None	None	None	None
162.m02627	CNAG_04505	YER020W	GPA2	SPAC23H3.13c	gpa2	orf19.1621	ca4012	GPA2	KOG0082	DT	G-protein alpha subunit (small G protein superfamily)	guanine nucleotide-binding protein subunit alpha	Nucleotide binding alpha subunit of the heterotrimeric G protein that interacts with the receptor Gpr1p, has signaling role in response to nutrients; green fluorescent protein (GFP)-fusion protein localizes to the cell periphery	heterotrimeric G protein alpha-2 subunit Gpa2	nucleotide-binding regulatory protein GPA2	Sce_OS-up_2.0	None	Sce_XS-up_2.0	None	Sce_HS-up_2.0	None	Sce_CSR-up_2.0	None	None	None	None	None	None	None	None	None	None	None	None	None	None	None	None	None	None	None	None	None	None	None	None	None	None	None
162.m02637	CNAG_04485	YOR317W	FAA1	SPBP4H10.11c	lcf2	orf19.7592	ca5992	FAA4	KOG1180	I	Acyl-CoA synthetase	long-chain-fatty-acid-CoA-ligase	Long chain fatty acyl-CoA synthetase with a preference for C12:0-C16:0 fatty acids; involved in the activation of imported fatty acids; localized to both lipid particles and mitochondrial outer membrane; essential for stationary phase	long-chain-fatty-acid-CoA ligase	long-chain fatty acid--CoA ligase and synthetase 4 (by homology)	Sce_OS-up_2.0	None	None	None	Sce_HS-up_2.0	None	None	None	None	None	None	None	None	None	None	None	None	None	None	None	None	None	None	None	None	None	None	None	None	Cal_XS-dw_1.5	None	None	None	None
162.m02648	CNAG_04474	None	None	None	None	None	None	None	None	None	None	monocarboxylic acid transporter	None	None	None	None	None	None	None	None	None	None	None	None	None	None	None	None	None	None	None	None	None	None	None	None	None	None	None	None	None	None	None	None	None	None	None	None	None
162.m02661	CNAG_04450	YER164W	CHD1	SPAC3G6.01	hrp3	orf19.3035	ca5064	CHD1	KOG0384	K	Chromodomain-helicase DNA-binding protein	transcription regulator	Nucleosome remodeling factor that functions in regulation of transcription elongation; contains a chromo domain, a helicase domain and a DNA-binding domain; component of both the SAGA and SLIK complexes	ATP-dependent DNA helicase Hrp3	transcriptional regulator (by homology)	None	None	None	None	None	None	None	None	None	None	None	None	None	None	None	None	None	None	None	None	None	None	None	None	None	None	None	None	None	None	None	None	None	None
162.m02670	CNAG_04440	YOR143C	THI80	SPAC6F12.05c	tnr3	orf19.1110	ca1462	THI80	KOG3153	H	Thiamine pyrophosphokinase	thiamine pyrophosphokinase	Thiamine pyrophosphokinase, phosphorylates thiamine to produce the coenzyme thiamine pyrophosphate (thiamine diphosphate)	thiamine diphosphokinase Tnr3	Thiamin pyrophosphokinase (by homology)	None	None	None	None	None	Sce_HS-dw_2.0	None	None	None	None	None	None	None	None	None	None	None	None	None	None	None	None	None	None	None	None	None	None	None	None	None	None	None	None
162.m02671	CNAG_04445	YNL096C	RPS7B	SPAC18G6.14c	rps7	orf19.1700	ca1502	RPS7A	KOG3320	J	40S ribosomal protein S7	40S ribosomal protein S7	Protein component of the small (40S) ribosomal subunit, nearly identical to Rps7Ap; interacts with Kti11p; deletion causes hypersensitivity to zymocin; has similarity to rat S7 and Xenopus S8 ribosomal proteins	40S ribosomal protein S7 (predicted)	ribosomal protein (by homology)	None	Sce_OS-dw_2.0	None	Sce_XS-dw_2.0	None	Sce_HS-dw_2.0	None	Sce_CSR-dw_2.0	None	None	None	Spo_XS-dw_2.0	None	None	None	None	None	None	None	None	None	None	None	None	None	None	None	None	None	Cal_XS-dw_1.5	None	Cal_XS-dw_2.0	None	None
162.m02676	CNAG_04459	None	None	None	None	None	None	None	None	None	None	hypothetical protein	None	None	None	None	None	None	None	None	None	None	None	None	None	None	None	None	None	None	None	None	None	None	None	None	None	None	None	None	None	None	None	None	None	None	None	None	None
162.m02683	CNAG_04472	None	None	None	None	None	None	None	KOG3098	S	Uncharacterized conserved protein	membrane protein	None	None	None	None	None	None	None	None	None	None	None	None	None	None	None	None	None	None	None	None	None	None	None	None	None	None	None	None	None	None	None	None	None	None	None	None	None
162.m02687	CNAG_07769	YDR457W	TOM1	SPAC19D5.04	ptr1	orf19.5776	ca2803	IPF11711	KOG0939	OK	E3 ubiquitin-protein ligase/Putative upstream regulatory element binding protein	E3 ubiquitin-protein ligase	E3 ubiquitin ligase of the hect-domain class; has a role in mRNA export from the nucleus and may regulate transcriptional coactivators	HECT domain	ubiquitin-protein ligase (by homology)	None	None	None	Sce_XS-dw_2.0	None	None	None	None	None	None	None	None	None	None	None	None	None	None	None	None	None	None	None	None	None	None	None	None	None	None	None	None	None	None
162.m02699	CNAG_04414	YBR293W	VBA2	SPBC12C2.13c	fnx1	None	None	None	KOG0254	R	Predicted transporter (major facilitator superfamily)	multidrug resistance protein fnx1	Permease of basic amino acids in the vacuolar membrane	MFS multidrug efflux transporter	None	None	None	None	None	None	None	None	None	None	None	None	None	None	None	None	None	None	None	None	None	None	None	None	None	None	None	None	None	None	None	None	None	None	None
162.m02712	CNAG_04393	None	None	None	None	None	None	None	KOG0952	A	DNA/RNA helicase MER3/SLH1, DEAD-box superfamily	RNA helicase	None	None	None	None	None	None	None	None	None	None	None	None	None	None	None	None	None	None	None	None	None	None	None	None	None	None	None	None	None	None	None	None	None	None	None	None	None
162.m02733	CNAG_04396	YCL012C	None	SPAC1687.07	None	orf19.7078	ca5620	IPF511	None	None	None	Aycl012	None	conserved fungal protein	unknown function	None	None	None	None	None	None	None	None	None	None	Spo_XS-up_2.0	None	None	None	None	None	None	None	None	None	None	None	None	None	None	None	None	None	None	None	None	None	None	None
162.m02741	CNAG_04365	YDR060W	MAK21	SPAC4F10.09c	None	orf19.5912	ca6134	MAK21	KOG2038	JK	CAATT-binding transcription factor/60S ribosomal subunit biogenesis protein	ribosome biogenesis protein	Constituent of 66S pre-ribosomal particles, required for large (60S) ribosomal subunit biogenesis; involved in nuclear export of pre-ribosomes; required for maintenance of dsRNA virus; homolog of human CAATT-binding protein	ribosome biogenesis protein Noc1 (predicted)	Ribosome biogenesis protein (by homology)	None	None	None	Sce_XS-dw_2.0	None	Sce_HS-dw_2.0	None	None	None	None	None	None	None	None	None	None	None	None	None	Cal_XS-dw	None	Cal_HS-dw	None	None	None	None	None	None	None	None	None	None	None	None
162.m02761	CNAG_04347	YER052C	HOM3	SPBC19F5.04	None	orf19.1235	ca2977	HOM3	KOG0456	E	Aspartate kinase	aspartate kinase	Aspartate kinase (L-aspartate 4-P-transferase); cytoplasmic enzyme that catalyzes the first step in the common pathway for methionine and threonine biosynthesis; expression regulated by Gcn4p and the general control of amino acid synthesis	aspartate kinase (predicted)	Aspartokinase (by homology)	None	None	Sce_XS-up_2.0	None	None	Sce_HS-dw_2.0	None	None	None	None	None	None	None	None	None	None	None	None	None	None	None	None	None	None	None	None	None	None	Cal_XS-up_1.5	None	Cal_XS-up_2.0	None	None	None
162.m02767	CNAG_04362	YOR046C	DBP5	SPBC12C2.06	None	orf19.1661	ca3464	DBP5	KOG0332	A	ATP-dependent RNA helicase	ATP-dependent RNA helicase DBP5	Cytoplasmic ATP-dependent RNA helicase of the DEAD-box family involved in mRNA export from the nucleus; involved in translation termination	ATP-dependent RNA helicase Dbp5	RNA helicase (by homology)	None	None	None	None	None	None	None	None	None	None	None	None	None	None	None	None	None	None	None	None	None	None	None	None	None	None	None	None	None	None	None	None	None	None
162.m02770	CNAG_04368	None	None	None	None	None	None	None	KOG2950	R	Uncharacterized protein involved in protein-protein interaction, contains polyproline-binding GYF domain	conserved hypothetical protein	None	None	None	None	None	None	None	None	None	None	None	None	None	None	None	None	None	None	None	None	None	None	None	None	None	None	None	None	None	None	None	None	None	None	None	None	None
162.m02783	CNAG_04307	None	None	SPCC1223.09	None	orf19.2114	ca2731	URIC	KOG1599	Q	Uricase (urate oxidase)	uricase	None	uricase (predicted)	uricase (urate oxidase) (by homology)	None	None	None	None	None	None	None	None	None	None	Spo_XS-up_2.0	None	None	None	None	None	None	None	None	None	None	None	None	None	Cal_OS-up_1.5	None	None	None	None	None	None	None	None	None
162.m02797	CNAG_04308	None	None	None	None	None	None	None	KOG2304	I	3-hydroxyacyl-CoA dehydrogenase	short chain 3-hydroxyacyl-CoA dehydrogenase	None	None	None	None	None	None	None	None	None	None	None	None	None	None	None	None	None	None	None	None	None	None	None	None	None	None	None	None	None	None	None	None	None	None	None	None	None
162.m02799	CNAG_04313	YHR179W	OYE2	SPAC5H10.10	None	orf19.3442	ca4021	EBP2	KOG0134	CR	NADH:flavin oxidoreductase/12-oxophytodienoate reductase	NADPH dehydrogenase 2	Widely conserved NADPH oxidoreductase containing flavin mononucleotide (FMN), homologous to Oye3p with slight differences in ligand binding and catalytic properties; may be involved in sterol metabolism	NADPH dehydrogenase (predicted)	NADPH dehydrogenase (by homology)	None	None	Sce_XS-up_2.0	None	None	Sce_HS-dw_2.0	None	None	None	None	None	None	None	None	None	None	None	None	None	None	None	None	None	None	None	None	None	None	Cal_XS-up_1.5	None	Cal_XS-up_2.0	None	None	None
162.m02814	CNAG_04141	None	None	None	None	None	None	None	KOG2275	E	Aminoacylase ACY1 and related metalloexopeptidases	vacuolar protein	None	None	None	None	None	None	None	None	None	None	None	None	None	None	None	None	None	None	None	None	None	None	None	None	None	None	None	None	None	None	None	None	None	None	None	None	None
162.m02851	CNAG_04187	YJL091C	GWT1	SPAC144.10c	gwt1	orf19.6884	ca4573	IPF9431	KOG0411	S	Uncharacterized membrane protein	GPI-anchored wall transfer protein 1	Protein involved in the inositol acylation of glucosaminyl phosphatidylinositol (GlcN-PI) to form glucosaminyl(acyl)phosphatidylinositol (GlcN(acyl)PI), an intermediate in the biosynthesis of glycosylphosphatidylinositol (GPI) anchors	pig-W	unknown function	None	None	None	None	None	None	None	None	None	None	None	None	None	None	None	None	None	None	None	None	None	None	None	None	None	None	None	None	None	None	None	None	None	None
162.m02864	CNAG_04176	None	None	None	None	None	None	None	KOG0627	K	Heat shock transcription factor	conserved hypothetical protein	None	None	None	None	None	None	None	None	None	None	None	None	None	None	None	None	None	None	None	None	None	None	None	None	None	None	None	None	None	None	None	None	None	None	None	None	None
162.m02871	CNAG_04194	YLR208W	SEC13	SPBC215.15	sec13	orf19.316	ca3392	SEC13	KOG1332	U	Vesicle coat complex COPII, subunit SEC13	protein transport protein SEC13	Component of both the Nup84 nuclear pore sub-complex and of the COPII complex (Sar1p, Sec13p, Sec16p, Sec23p, Sec24p, Sec31p, Sfb2p, and Sfb3p) which is important for the formation of ER to Golgi transport vesicles	COPII-coated vesicle component Sec13	Protein transport protein	None	None	None	None	None	None	None	None	None	None	None	None	None	None	None	None	None	None	None	None	None	None	None	None	None	None	None	None	None	None	None	None	None	None
162.m02883	CNAG_04210	None	None	None	None	None	None	None	KOG0254	R	Predicted transporter (major facilitator superfamily)	sugar transporter	None	None	None	None	None	None	None	None	None	None	None	None	None	None	None	None	None	None	None	None	None	None	None	None	None	None	None	None	None	None	None	None	None	None	None	None	None
162.m02913	CNAG_04266	YNL107W	YAF9	SPAC17G8.07	None	orf19.5501	None	None	KOG3149	K	Transcription initiation factor IIF, auxiliary subunit	YEATS family protein	Subunit of both the NuA4 histone H4 acetyltransferase complex and the SWR1 complex, may function to antagonize silencing near telomeres; interacts directly with Swc4p, has homology to human leukemogenic protein AF9, contains a YEATS domain	YEATS family histone acetyltransferase subunit (predicted)	None	None	None	None	None	None	None	None	None	None	None	None	None	None	None	None	None	None	None	None	None	None	None	None	None	None	None	None	None	None	None	None	None	None	None
162.m02919	CNAG_04120	YMR277W	FCP1	SPAC19B12.05c	fcp1	orf19.6742	ca5952	IPF3503	KOG0323	K	TFIIF-interacting CTD phosphatases, including NLI-interacting factor	conserved hypothetical protein	Carboxy-terminal domain (CTD) phosphatase, essential for dephosphorylation of the repeated C-terminal domain of the RNA polymerase II large subunit (Rpo21p)	CTD phosphatase Fcp1	similar to Saccharomyces cerevisiae Fcp1p TFIIF interacting component of CTD phosphatase (by homology)	None	Sce_OS-dw_2.0	None	Sce_XS-dw_2.0	None	None	None	None	None	None	None	None	None	None	None	None	None	None	None	None	None	None	None	None	None	None	None	None	None	None	None	None	None	None
162.m02929	CNAG_04111	None	None	SPCC126.08c	None	orf19.2200	ca2436	IPF5500	KOG3839	U	Lectin VIP36, involved in the transport of glycoproteins carrying high mannose-type glycans	lectin	None	lectin (predicted)	unknown function	None	None	None	None	None	None	None	None	None	None	None	None	None	None	None	None	None	None	None	None	None	None	None	None	None	None	None	None	None	None	None	None	None	None
162.m02936	CNAG_04278	YDL164C	CDC9	SPAC20G8.01	cdc17	orf19.6155	ca3145	CDC9	KOG0967	L	ATP-dependent DNA ligase I	DNA ligase	DNA ligase found in the nucleus and mitochondria, an essential enzyme that joins Okazaki fragments during DNA replication; also acts in nucleotide excision repair, base excision repair, and recombination	ATP-dependent DNA ligase Cdc17	DNA ligase (by homology)	None	None	None	None	None	None	None	None	None	None	None	None	None	None	None	None	None	None	None	None	None	None	None	None	None	None	None	None	None	None	None	None	None	None
162.m02939	CNAG_04272	None	None	SPACUNK12.02c	cmk1	None	None	None	KOG0032	T	Ca2+/calmodulin-dependent protein kinase, EF-Hand protein superfamily	CAMK/CAMK1 protein kinase	None	calcium/calmodulin-dependent protein kinase Cmk1	None	None	None	None	None	None	None	None	None	None	None	None	None	None	None	None	None	None	None	None	None	None	None	None	None	None	None	None	None	None	None	None	None	None	None
162.m02962	CNAG_04515	None	None	None	None	None	None	None	KOG2491	Y	Nuclear matrix protein	conserved hypothetical protein	None	None	None	None	None	None	None	None	None	None	None	None	None	None	None	None	None	None	None	None	None	None	None	None	None	None	None	None	None	None	None	None	None	None	None	None	None
162.m02978	CNAG_04438	None	None	SPAC1687.04	None	None	None	None	KOG2545	S	Conserved membrane protein	prov protein	None	conserved eukaryotic protein	None	None	None	None	None	None	None	None	None	None	None	None	None	None	None	None	None	None	None	None	None	None	None	None	None	None	None	None	None	None	None	None	None	None	None
162.m02995	CNAG_04394	None	None	None	None	None	None	None	None	None	None	conserved hypothetical protein	None	None	None	None	None	None	None	None	None	None	None	None	None	None	None	None	None	None	None	None	None	None	None	None	None	None	None	None	None	None	None	None	None	None	None	None	None
162.m03011	CNAG_04362	YOR046C	DBP5	SPBC12C2.06	None	orf19.1661	ca3464	DBP5	KOG0332	A	ATP-dependent RNA helicase	ATP-dependent RNA helicase DBP5	Cytoplasmic ATP-dependent RNA helicase of the DEAD-box family involved in mRNA export from the nucleus; involved in translation termination	ATP-dependent RNA helicase Dbp5	RNA helicase (by homology)	None	None	None	None	None	None	None	None	None	None	None	None	None	None	None	None	None	None	None	None	None	None	None	None	None	None	None	None	None	None	None	None	None	None
162.m03019	CNAG_04324	None	None	None	None	None	None	None	None	None	None	Atg22B-1p	None	None	None	None	None	None	None	None	None	None	None	None	None	None	None	None	None	None	None	None	None	None	None	None	None	None	None	None	None	None	None	None	None	None	None	None	None
162.m04565	CNAG_04235	YPR100W	MRPL51	SPBC19C2.12	mrpl51	None	None	None	KOG3445	J	Mitochondrial/chloroplast ribosomal protein 36a	conserved hypothetical protein	Mitochondrial ribosomal protein of the large subunit	mitochondrial ribosomal protein subunit L51	None	None	None	None	None	None	None	None	None	None	None	None	None	None	None	None	None	None	None	None	None	None	None	None	None	None	None	None	None	None	None	None	None	None	None
162.m04575	CNAG_04112	None	None	None	None	None	None	None	KOG1577	R	Aldo/keto reductase family proteins	oxidoreductase	None	None	None	None	None	None	None	None	None	None	None	None	None	None	None	None	None	None	None	None	None	None	None	None	None	None	None	None	None	None	None	None	None	None	None	None	None
163.m02758	CNAG_01136	None	None	SPBC16A3.04	rsm25	None	None	None	None	None	None	conserved hypothetical protein	None	mitochondrial ribosomal protein subunit Rsm25	None	None	None	None	None	None	None	None	None	None	None	None	None	None	None	None	None	None	None	None	None	None	None	None	None	None	None	None	None	None	None	None	None	None	None
163.m02820	CNAG_07441	None	None	None	None	None	None	None	KOG1052	PET	Glutamate-gated kainate-type ion channel receptor subunit GluR5 and related subunits	conserved hypothetical protein	None	None	None	None	None	None	None	None	None	None	None	None	None	None	None	None	None	None	None	None	None	None	None	None	None	None	None	None	None	None	None	None	None	None	None	None	None
163.m02841	None	None	None	None	None	None	None	None	None	None	None	None	None	None	None	None	None	None	None	None	None	None	None	None	None	None	None	None	None	None	None	None	None	None	None	None	None	None	None	None	None	None	None	None	None	None	None	None	None
163.m02872	CNAG_01024	None	None	SPAC2F3.02	None	None	None	None	None	None	None	conserved hypothetical protein	None	ER protein translocation subcomplex subunit Sec72 (predicted)	None	None	None	None	None	None	None	None	None	None	None	None	None	None	None	None	None	None	None	None	None	None	None	None	None	None	None	None	None	None	None	None	None	None	None
163.m02928	CNAG_00972	None	None	None	None	None	None	None	KOG3375	R	Phosphoprotein/predicted coiled-coil protein	conserved hypothetical protein	None	None	None	None	None	None	None	None	None	None	None	None	None	None	None	None	None	None	None	None	None	None	None	None	None	None	None	None	None	None	None	None	None	None	None	None	None
163.m03775	CNAG_00874	YBL024W	NCL1	SPAC23C4.17	None	orf19.518	ca4235	NCL1	KOG2198	J	tRNA cytosine-5-methylases and related enzymes of the NOL1/NOP2/sun superfamily	tRNA (cytosine-5-)-methyltransferase	S-adenosyl-L-methionine-dependent tRNA: m5C-methyltransferase, methylates cytosine to m5C at several positions in tRNAs and intron-containing pre-tRNAs; similar to Nop2p and human proliferation associated nucleolar protein p120	tRNA (cytosine-5-)-methyltransferase (predicted)	Probable proliferating-cell nucleolar antigen (by homology)	None	Sce_OS-dw_2.0	None	Sce_XS-dw_2.0	None	Sce_HS-dw_2.0	None	Sce_CSR-dw_2.0	None	None	None	Spo_XS-dw_2.0	None	Spo_Cd-dw_2.0	None	Spo_CESR-dw	None	None	None	Cal_XS-dw	None	None	None	Cal_SSR.XS-dw	None	None	None	None	None	Cal_XS-dw_1.5	None	None	None	None
163.m03785	CNAG_00893	None	None	None	None	None	None	None	None	None	None	conserved hypothetical protein	None	None	None	None	None	None	None	None	None	None	None	None	None	None	None	None	None	None	None	None	None	None	None	None	None	None	None	None	None	None	None	None	None	None	None	None	None
163.m03795	CNAG_00897	None	None	None	None	orf19.7362	ca5660	SKN1.3f	None	None	None	glucosidase	None	None	Glucan synthase subunit, 3-prime end	None	None	None	None	None	None	None	None	None	None	None	None	None	None	None	None	None	None	None	None	None	None	None	None	None	None	None	None	None	None	None	None	None	None
163.m03817	CNAG_00914	None	None	None	None	None	None	None	None	None	None	glucosidase	None	None	None	None	None	None	None	None	None	None	None	None	None	None	None	None	None	None	None	None	None	None	None	None	None	None	None	None	None	None	None	None	None	None	None	None	None
163.m03838	CNAG_00939	None	None	None	None	None	None	None	None	None	None	glucan 1,3-beta-glucosidase	None	None	None	None	None	None	None	None	None	None	None	None	None	None	None	None	None	None	None	None	None	None	None	None	None	None	None	None	None	None	None	None	None	None	None	None	None
163.m03861	CNAG_01018	YER025W	GCD11	SPBC17G9.09	tif213	orf19.4223	ca1322	GCD11	KOG0466	J	Translation initiation factor 2, gamma subunit (eIF-2gamma; GTPase)	eukaryotic translation initiation factor 2 gamma	Gamma subunit of the translation initiation factor eIF2, involved in the identification of the start codon; binds GTP when forming the ternary complex with GTP and tRNAi-Met	translation initiation factor eIF2 gamma subunit	Translation initiation factor eIF2 (by homology)	None	None	None	Sce_XS-dw_2.0	None	Sce_HS-dw_2.0	None	None	None	None	None	None	None	None	None	None	None	None	None	None	None	None	None	None	None	None	None	None	None	None	None	None	None	Cal_Cd-dw_1.5
163.m03884	CNAG_00978	None	None	None	None	orf19.1682	ca0216	IPF11681	KOG2865	C	NADH:ubiquinone oxidoreductase, NDUFA9/39kDa subunit	NADH dehydrogenase	None	None	unknown function	None	None	None	None	None	None	None	None	None	None	None	None	None	None	None	None	None	None	None	Cal_XS-dw	None	None	None	Cal_SSR.XS-dw	None	None	None	None	None	None	None	None	None	None
163.m03915	CNAG_01005	YCL035C	GRX1	SPAC15E1.09	grx2	orf19.6509	ca4964	IPF3920	KOG1752	O	Glutaredoxin and related proteins	glutathione transferase	Hydroperoxide and superoxide-radical responsive heat-stable glutathione-dependent disulfide oxidoreductase with active site cysteine pair; protects cells from oxidative damage	glutaredoxin Grx2	unknown function	Sce_OS-up_2.0	None	Sce_XS-up_2.0	None	Sce_HS-up_2.0	None	Sce_CSR-up_2.0	None	None	None	None	None	None	None	None	None	None	None	None	None	None	None	None	None	None	None	None	None	None	None	None	None	None	None
163.m03920	CNAG_01003	YHR042W	NCP1	SPBC29A10.01	ccr1	orf19.2672	ca3327	NCP1	KOG1158	C	NADP/FAD dependent oxidoreductase	electron transporter	NADP-cytochrome P450 reductase; involved in ergosterol biosynthesis; associated and coordinately regulated with Erg11p	NADPH-cytochrome p450 reductase	NADPH-cytochrome P450 reductase	None	None	None	Sce_XS-dw_2.0	None	Sce_HS-dw_2.0	None	None	None	None	None	None	None	None	None	None	None	None	None	None	None	None	None	None	None	None	None	None	None	None	None	None	None	None
163.m03924	CNAG_00993	YOR125C	CAT5	SPBC337.15c	coq7	orf19.1940	ca3358	IPF19984	KOG4061	R	DMQ mono-oxygenase/Ubiquinone biosynthesis protein COQ7/CLK-1/CAT5	coenzyme q10 biosynthesis protein	Protein required for ubiquinone (Coenzyme Q) biosynthesis; localizes to the matrix face of the mitochondrial inner membrane in a large complex with ubiquinone biosynthetic enzymes; required for gluconeogenic gene activation	ubiquinone biosynthesis protein Coq7	similar to Saccharomyces cerevisiae Cat5p involved in coenzyme Q (ubiquinone) biosynthesis (by homology)	None	None	None	Sce_XS-dw_2.0	Sce_HS-up_2.0	None	None	None	None	None	None	None	None	None	None	None	None	None	None	None	None	None	None	None	None	None	None	None	None	None	None	None	None	None
163.m03927	CNAG_00986	YHR111W	UBA4	SPAC2G11.10c	None	orf19.2324	ca3346	IPF13356	KOG2017	H	Molybdopterin synthase sulfurylase	URM1 activating enzyme	Protein that activates Urm1p before its conjugation to proteins (urmylation); one target is the thioredoxin peroxidase Ahp1p, suggesting a role of urmylation in the oxidative stress response	URM1 activating enzyme (predicted)	molybdopterin biosynthesis (by homology)	None	None	Sce_XS-up_2.0	None	None	None	None	None	None	Spo_OS-dw_2.0	None	None	None	None	None	None	None	Cal_OS-dw	None	None	None	None	None	Cal_SSR.OS-dw	None	Cal_OS-dw_1.5	None	None	Cal_XS-up_1.5	None	Cal_XS-up_2.0	None	None	None
163.m04752	CNAG_00901	None	None	None	None	None	None	None	None	None	None	conserved hypothetical protein	None	None	None	None	None	None	None	None	None	None	None	None	None	None	None	None	None	None	None	None	None	None	None	None	None	None	None	None	None	None	None	None	None	None	None	None	None
163.m04765	CNAG_00906	None	None	SPCC14G10.02	None	None	None	None	KOG1791	S	Uncharacterized conserved protein	nucleolar protein	None	ribosome biogenesis protein Urb1	None	None	None	None	None	None	None	None	None	None	None	None	None	None	None	None	None	None	None	None	None	None	None	None	None	None	None	None	None	None	None	None	None	None	None
163.m04782	CNAG_01006	None	None	None	None	None	None	None	None	None	None	conserved hypothetical protein	None	None	None	None	None	None	None	None	None	None	None	None	None	None	None	None	None	None	None	None	None	None	None	None	None	None	None	None	None	None	None	None	None	None	None	None	None
163.m04809	CNAG_01031	None	None	None	None	None	None	None	KOG1726	V	HVA22/DP1 gene product-related proteins	conserved hypothetical protein	None	None	None	None	None	None	None	None	None	None	None	None	None	None	None	None	None	None	None	None	None	None	None	None	None	None	None	None	None	None	None	None	None	None	None	None	None
163.m06117	CNAG_01099	None	None	SPBC1709.15c	cft2	orf19.325	ca3384	IPF8362	KOG1135	A	mRNA cleavage and polyadenylation factor II complex, subunit CFT2 (CPSF subunit)	cleavage and polyadenylation specificity factor subunit	None	cleavage factor two Cft2/polyadenylation factor CPSF-73 (predicted)	similar to Saccharomyces cerevisiae Cft2p involved in cleavage and polyadenylation specificity factor, part of CF II (by homology)	None	None	None	None	None	None	None	None	None	None	None	None	None	None	None	None	None	None	None	None	None	None	None	None	None	None	None	None	None	Cal_XS-dw_1.5	None	None	None	None
163.m06124	CNAG_01102	None	None	SPAC4H3.08	None	None	None	None	KOG0725	R	Reductases with broad range of substrate specificities	oxidoreductase	None	short chain dehydrogenase (predicted)	None	None	None	None	None	None	None	None	None	Spo_OS-up_2.0	None	Spo_XS-up_2.0	None	Spo_Cd-up_2.0	None	Spo_CESR-up	None	None	None	None	None	None	None	None	None	None	None	None	None	None	None	None	None	None	None
163.m06141	CNAG_01387	None	None	None	None	None	None	None	None	None	None	conserved hypothetical protein	None	None	None	None	None	None	None	None	None	None	None	None	None	None	None	None	None	None	None	None	None	None	None	None	None	None	None	None	None	None	None	None	None	None	None	None	None
163.m06143	CNAG_01384	None	None	None	None	None	None	None	KOG2533	G	Permease of the major facilitator superfamily	bodown198	None	None	None	None	None	None	None	None	None	None	None	None	None	None	None	None	None	None	None	None	None	None	None	None	None	None	None	None	None	None	None	None	None	None	None	None	None
163.m06159	CNAG_01103	YDL043C	PRP11	SPBC21C3.05	sap62	orf19.4724	ca1604	IPF13653	KOG0227	A	Splicing factor 3a, subunit 2	zinc finger protein Sap62	Subunit of the SF3a splicing factor complex, required for spliceosome assembly	zinc finger protein Sap62	unknown function	None	None	None	None	None	None	None	None	None	None	None	None	None	None	None	None	None	Cal_OS-dw	None	None	None	None	None	Cal_SSR.OS-dw	None	None	None	None	None	None	None	None	None	None
163.m06200	CNAG_01155	YHL032C	GUT1	None	None	orf19.558	ca0929	GUT1	KOG2517	G	Ribulose kinase and related carbohydrate kinases	glycerol kinase	Glycerol kinase, converts glycerol to glycerol-3-phosphate; glucose repression of expression is mediated by Adr1p and Ino2p-Ino4p; derepression of expression on non-fermentable carbon sources is mediated by Opi1p and Rsf1p	None	Glycerol kinase (by homology)	None	None	None	None	None	None	None	None	None	None	None	None	None	None	None	None	None	None	None	None	None	None	None	None	None	None	None	None	None	Cal_XS-dw_1.5	None	Cal_XS-dw_2.0	None	None
163.m06204	CNAG_01150	None	None	None	None	orf19.118	ca0482	IPF14763	None	None	None	delta-12 fatty acid desaturase	None	None	delta-12 fatty acid desaturase (by homology)	None	None	None	None	None	None	None	None	None	None	None	None	None	None	None	None	None	None	None	None	None	Cal_HS-dw	None	Cal_SSR.HS-dw	None	Cal_OS-dw_1.5	None	Cal_OS-dw_2.0	None	None	None	None	None	None
163.m06205	CNAG_01147	YKL013C	ARC19	SPAC6G9.07c	arc4	orf19.3251	ca5448	ARC19.3f	KOG1876	Z	Actin-related protein Arp2/3 complex, subunit ARPC4	ARP2/3 complex 20 kDa subunit	Subunit of the ARP2/3 complex, which is required for the motility and integrity of cortical actin patches	ARP2/3 actin-organizing complex subunit Arc4	subunit of the Arp2/3 complex involved in the control of actin polymerization, exon 2 (by homology)	None	None	None	None	None	None	None	None	None	None	None	None	None	None	None	None	None	None	None	None	None	None	None	None	None	None	None	None	None	None	None	None	None	None
163.m06232	None	None	None	None	None	None	None	None	None	None	None	None	None	None	None	None	None	None	None	None	None	None	None	None	None	None	None	None	None	None	None	None	None	None	None	None	None	None	None	None	None	None	None	None	None	None	None	None	None
163.m06236	CNAG_00890	None	None	None	None	None	None	None	None	None	None	conserved hypothetical protein	None	None	None	None	None	None	None	None	None	None	None	None	None	None	None	None	None	None	None	None	None	None	None	None	None	None	None	None	None	None	None	None	None	None	None	None	None
163.m06279	CNAG_01174	YJL108C	PRM10	SPAC7D4.12c	None	orf19.6527	ca4951	IPF13607	None	None	None	DUF1212 family protein	Pheromone-regulated protein, predicted to have 5 transmembrane segments; induced by treatment with 8-methoxypsoralen and UVA irradiation	DUF1212 family protein	unknown function	Sce_OS-up_2.0	None	None	None	Sce_HS-up_2.0	None	None	None	None	None	None	None	None	None	None	None	None	None	None	None	None	None	None	None	Cal_OS-up_1.5	None	Cal_OS-up_2.0	None	Cal_XS-up_1.5	None	Cal_XS-up_2.0	None	None	None
163.m06289	CNAG_01239	None	None	None	None	None	None	None	None	None	None	chitin deacetylase	None	None	None	None	None	None	None	None	None	None	None	None	None	None	None	None	None	None	None	None	None	None	None	None	None	None	None	None	None	None	None	None	None	None	None	None	None
163.m06303	CNAG_01429	None	None	None	None	None	None	None	KOG2389	K	Predicted bromodomain transcription factor	conserved hypothetical protein	None	None	None	None	None	None	None	None	None	None	None	None	None	None	None	None	None	None	None	None	None	None	None	None	None	None	None	None	None	None	None	None	None	None	None	None	None
163.m06304	CNAG_01430	None	None	None	None	None	None	None	None	None	None	conserved hypothetical protein	None	None	None	None	None	None	None	None	None	None	None	None	None	None	None	None	None	None	None	None	None	None	None	None	None	None	None	None	None	None	None	None	None	None	None	None	None
163.m06306	CNAG_07415	None	None	None	None	None	None	None	None	None	None	conserved hypothetical protein	None	None	None	None	None	None	None	None	None	None	None	None	None	None	None	None	None	None	None	None	None	None	None	None	None	None	None	None	None	None	None	None	None	None	None	None	None
163.m06311	CNAG_01438	YLR182W	SWI6	SPBC336.12c	cdc10	None	None	None	None	None	None	transcription factor	Transcription cofactor, forms complexes with DNA-binding proteins Swi4p and Mbp1p to regulate transcription at the G1/S transition; involved in meiotic gene expression; localization regulated by phosphorylation; potential Cdc28p substrate	MBF transcription factor complex subunit Cdc10	None	None	None	None	None	None	None	None	None	None	None	Spo_XS-up_2.0	None	None	None	None	None	None	None	None	None	None	None	None	None	None	None	None	None	None	None	None	None	None	None
163.m06315	CNAG_01437	YCL059C	KRR1	SPBC25B2.05	mis3	orf19.661	ca4096	KRR1	KOG2874	JD	rRNA processing protein	ribosomal RNA assembly protein mis3	Essential nucleolar protein required for the synthesis of 18S rRNA and for the assembly of 40S ribosomal subunit	rRNA processing protein Mis3	involved in cell division and spore germination	None	Sce_OS-dw_2.0	None	Sce_XS-dw_2.0	None	Sce_HS-dw_2.0	None	Sce_CSR-dw_2.0	None	None	None	Spo_XS-dw_2.0	None	Spo_Cd-dw_2.0	None	Spo_CESR-dw	None	Cal_OS-dw	None	Cal_XS-dw	None	Cal_HS-dw	None	Cal_CSR-dw	None	None	None	None	None	None	None	None	None	None
163.m06318	CNAG_01431	None	None	None	None	None	None	None	KOG0490	R	Transcription factor, contains HOX domain	conserved hypothetical protein	None	None	None	None	None	None	None	None	None	None	None	None	None	None	None	None	None	None	None	None	None	None	None	None	None	None	None	None	None	None	None	None	None	None	None	None	None
163.m06324	CNAG_01422	YBR287W	None	SPAC5D6.04	None	orf19.6117	ca0262	IPF20054	KOG2722	S	Predicted membrane protein	endoplasmic reticulum protein	None	auxin family transmembrane transporter (predicted)	None	None	None	None	None	Sce_HS-up_2.0	None	None	None	None	None	Spo_XS-up_2.0	None	None	None	None	None	None	None	None	None	None	None	None	None	None	None	None	None	Cal_XS-up_1.5	None	Cal_XS-up_2.0	None	Cal_Cd-up_1.5	None
163.m06342	CNAG_06809	YJL057C	IKS1	None	None	orf19.428	ca4053	IKS1	KOG0032	T	Ca2+/calmodulin-dependent protein kinase, EF-Hand protein superfamily	other/IKS protein kinase	Putative serine/threonine kinase; expression is induced during mild heat stress; deletion mutants are hypersensitive to copper sulphate and resistant to sorbate; interacts with an N-terminal fragment of Sst2p	None	PROBABLE SERINE/THREONINE-PROTEIN KINASE	Sce_OS-up_2.0	None	Sce_XS-up_2.0	None	Sce_HS-up_2.0	None	Sce_CSR-up_2.0	None	None	None	None	None	None	None	None	None	None	None	None	None	None	None	None	None	None	None	None	None	None	None	None	None	None	None
163.m06403	CNAG_07400	YLL018C	DPS1	SPCC1223.07c	None	orf19.2407	ca3052	DPS1	KOG0556	J	Aspartyl-tRNA synthetase	aspartate-tRNA ligase	Cytoplasmic aspartyl-tRNA synthetase, homodimeric enzyme that catalyzes the specific aspartylation of tRNA(Asp); class II aminoacyl tRNA synthetase; binding to its own mRNA may confer autoregulation	aspartate-tRNA ligase (predicted)	aspartyl-tRNA synthetase (by homology)	None	None	None	None	None	None	None	None	None	None	None	None	None	None	None	None	None	None	None	None	None	None	None	None	None	None	None	None	None	None	None	None	None	None
163.m06410	CNAG_06852	None	None	None	None	None	None	None	None	None	None	conserved hypothetical protein	None	None	None	None	None	None	None	None	None	None	None	None	None	None	None	None	None	None	None	None	None	None	None	None	None	None	None	None	None	None	None	None	None	None	None	None	None
163.m06413	CNAG_06838	YPL029W	SUV3	SPAC637.11	suv3	orf19.4519	ca2908	SUV3	KOG0953	A	Mitochondrial RNA helicase SUV3, DEAD-box superfamily	mitochondrial RNA helicase	ATP-dependent RNA helicase, component of the mitochondrial degradosome along with the RNase Dss1p; the degradosome associates with the ribosome and mediates turnover of aberrant or unprocessed RNAs	mitochondrial ATP-dependent RNA helicase Suv3 (predicted)	ATP-dependent RNA helicase, mitochondrial (by homology)	None	None	None	None	None	None	None	None	None	None	None	None	None	None	None	None	None	None	None	None	None	None	None	None	None	None	None	None	None	Cal_XS-dw_1.5	None	None	None	None
163.m06415	CNAG_06835	YPR159W	KRE6	SPAC23H3.11c	None	None	None	None	None	None	None	glucosidase	Protein required for beta-1,6 glucan biosynthesis; putative beta-glucan synthase; appears functionally redundant with Skn1p	glucosidase (predicted)	None	None	None	None	None	Sce_HS-up_2.0	None	None	None	None	None	None	None	None	None	None	None	None	None	None	None	None	None	None	None	None	None	None	None	None	None	None	None	None	None
163.m06424	CNAG_01230	None	None	None	None	None	None	None	None	None	None	chitin deacetylase 2	None	None	None	None	None	None	None	None	None	None	None	None	None	None	None	None	None	None	None	None	None	None	None	None	None	None	None	None	None	None	None	None	None	None	None	None	None
163.m06431	CNAG_01209	YFR019W	FAB1	SPBC3E7.01	fab1	orf19.1513	ca2179	FAB1	KOG0230	T	Phosphatidylinositol-4-phosphate 5-kinase and related FYVE finger-containing proteins	1-phosphatidylinositol-3-phosphate 5-kinase	1-phosphatidylinositol-3-phosphate 5-kinase; vacuolar membrane kinase that generates phosphatidylinositol (3,5)P2, which is involved in vacuolar sorting and homeostasis	1-phosphatidylinositol-3-phosphate 5-kinase Fab1	phosphatidylinositol 3-phosphate 5-kinase (by homology)	None	None	None	None	Sce_HS-up_2.0	None	None	None	None	None	None	None	None	None	None	None	None	None	None	None	None	None	None	None	None	None	None	None	None	None	None	None	None	None
163.m06436	CNAG_01251	YKL010C	UFD4	SPAC12B10.01c	None	orf19.3237	ca5435	UFD4	KOG0170	O	E3 ubiquitin protein ligase	ubiquitin fusion degradation protein 4	Ubiquitin-protein ligase (E3) that interacts with Rpt4p and Rpt6p, two subunits of the 19S particle of the 26S proteasome; cytoplasmic E3 involved in the degradation of ubiquitin fusion proteins	ubiquitin-protein ligase E3 (predicted)	ubiquitin fusion degradation protein (by homology)	None	None	None	None	None	None	None	None	None	None	Spo_XS-up_2.0	None	None	None	None	None	None	None	None	None	None	None	None	None	None	None	None	None	None	None	None	None	None	None
163.m06439	CNAG_01253	YHR005C-A	MRS11	SPAC222.03c	tim10	orf19.4577.3	ca5140	TIM10	KOG3480	U	Mitochondrial import inner membrane translocase, subunits TIM10/TIM12	protein transporter	Essential protein of the mitochondrial intermembrane space, forms a complex with Tim9p (TIM10 complex) that mediates insertion of hydrophobic proteins at the inner membrane, has homology to Mrs5p, which is also involved in this process	Tim9-Tim10 complex subunit Tim10 (predicted)	Subunit of the Tim22-complex (by homology)	None	None	None	None	None	Sce_HS-dw_2.0	None	None	None	None	None	None	None	None	None	None	None	None	None	None	None	None	None	None	None	None	None	None	None	None	None	None	None	None
163.m06447	CNAG_01262	YOR212W	STE4	SPBC32H8.07	git5	orf19.799	ca0438	STE4	KOG0286	R	G-protein beta subunit	G-protein beta subunit GPB1	G protein beta subunit, forms a dimer with Ste18p to activate the mating signaling pathway, forms a heterotrimer with Gpa1p and Ste18p to dampen signaling; may recruit Rho1p to the polarized growth site during mating; contains WD40 repeats	heterotrimeric G protein beta subunit Git5	GTP-binding protein beta subunit of the pheromone pathway, 5-prime end (by homology)	None	None	None	Sce_XS-dw_2.0	None	Sce_HS-dw_2.0	None	None	Spo_OS-up_2.0	None	Spo_XS-up_2.0	None	Spo_Cd-up_2.0	None	Spo_CESR-up	None	None	None	None	None	None	None	None	None	None	None	None	None	None	None	None	None	None	None
163.m06454	CNAG_01271	YJR050W	ISY1	SPBC32F12.05c	cwf12	orf19.6685	ca4288	IPF6662	KOG3068	A	mRNA splicing factor	pre-mRNA-splicing factor ISY1	Component of the spliceosome complex involved in pre-mRNA splicing, auxiliary splicing factor that may modulate Syf1p activity and help optimize splicing; isy1 syf2 double mutation activates the spindle checkpoint, causing cell cycle arrest	complexed with Cdc5 protein Cwf12	similar to Saccharomyces cerevisiae Isy1p pre-mRNA splicing factor (by homology)	Sce_OS-up_2.0	None	None	None	None	None	None	None	None	None	None	None	None	None	None	None	None	None	None	None	None	None	None	None	None	None	None	None	None	None	None	None	None	None
163.m06459	CNAG_01276	YLR383W	SMC6	SPCC5E4.06	smc6	orf19.6568	ca4880	RHC18	KOG0250	L	DNA repair protein RAD18 (SMC family protein)	conserved hypothetical protein	Protein involved in structural maintenance of chromosomes; essential subunit of Mms21-Smc5-Smc6 complex; required for growth, DNA repair, interchromosomal and sister chromatid recombination; homologous to S. pombe rad18	Smc5-6 complex SMC subunit Smc6	Recombination repair protein (by homology)	None	None	None	None	None	None	None	None	None	None	None	None	None	None	None	None	None	None	None	None	None	None	None	None	None	None	None	None	None	None	None	None	None	None
163.m06460	CNAG_01274	YNL287W	SEC21	SPAC57A7.10c	sec21	orf19.759	ca1931	IPF3905	KOG1078	U	Vesicle coat complex COPI, gamma subunit	coatomer subunit gamma	Gamma subunit of coatomer, a heptameric protein complex that together with Arf1p forms the COPI coat; involved in ER to Golgi transport of selective cargo	coatomer gamma subunit Sec21 (predicted)	similar to Saccharomyces cerevisiae Sec21p coatomer complex gamma chain (gamma-COP) of secretory pathway vesicles (by homology)	None	None	None	None	None	None	None	None	None	None	None	None	None	None	None	None	None	None	None	None	None	None	None	None	None	None	None	None	None	None	None	None	None	None
163.m06461	CNAG_01272	None	None	None	None	None	None	None	KOG3695	S	Uncharacterized conserved protein	hypothetical protein	None	None	None	None	None	None	None	None	None	None	None	None	None	None	None	None	None	None	None	None	None	None	None	None	None	None	None	None	None	None	None	None	None	None	None	None	None
163.m06462	CNAG_01264	YIL094C	LYS12	SPAC31G5.04	None	orf19.2525	ca1737	LYS12	KOG0785	E	Isocitrate dehydrogenase, alpha subunit	isocitrate dehydrogenase	Homo-isocitrate dehydrogenase, an NAD-linked mitochondrial enzyme required for the fourth step in the biosynthesis of lysine, in which homo-isocitrate is oxidatively decarboxylated to alpha-ketoadipate	homoisocitrate dehydrogenase	homo-isocitrate dehydrogenase (by homology)	None	None	None	Sce_XS-dw_2.0	None	Sce_HS-dw_2.0	None	None	None	None	None	None	None	None	None	None	None	None	Cal_XS-up	None	None	None	Cal_SSR.XS-up	None	None	None	None	None	None	None	None	None	None	None
163.m06477	CNAG_01290	None	None	None	None	None	None	None	None	None	None	conserved hypothetical protein	None	None	None	None	None	None	None	None	None	None	None	None	None	None	None	None	None	None	None	None	None	None	None	None	None	None	None	None	None	None	None	None	None	None	None	None	None
163.m06480	CNAG_01298	YML059C	NTE1	SPCC4B3.04c	nte1	orf19.6396	None	None	KOG2968	R	Predicted esterase of the alpha-beta hydrolase superfamily (Neuropathy target esterase), contains cAMP-binding domains	hydrolase	Serine esterase that deacylates exogenous lysophospholipids, homolog of human neuropathy target esterase (NTE); mammalian NTE1 deacylates phosphatidylcholine to glycerophosphocholine	lysophospholipase	None	None	None	None	None	None	None	None	None	None	None	None	None	None	None	None	None	None	None	None	None	None	None	None	None	None	None	None	None	None	None	None	None	None	None
163.m06487	CNAG_01310	YCR016W	None	None	None	orf19.6730	ca4355	IPF3649	KOG4829	S	Uncharacterized conserved protein	nucleolar protein	None	None	unknown function	None	Sce_OS-dw_2.0	None	Sce_XS-dw_2.0	None	Sce_HS-dw_2.0	None	Sce_CSR-dw_2.0	None	None	None	None	None	None	None	None	None	None	None	None	None	Cal_HS-dw	None	Cal_SSR.HS-dw	None	None	None	None	None	None	None	None	None	None
163.m06491	CNAG_07427	YPL204W	HRR25	SPBC3H7.15	hhp1	orf19.3476	ca2902	HRR25	KOG1164	T	Casein kinase (serine/threonine/tyrosine protein kinase)	CAMK/CAMKL/CHK1 protein kinase	Protein kinase involved in regulating diverse events including vesicular trafficking, DNA repair, and chromosome segregation; binds the CTD of RNA pol II; homolog of mammalian casein kinase 1delta (CK1delta)	serine/threonine protein kinase Hhp1	casein kinase I (by homology)	None	None	None	None	None	None	None	None	None	None	None	None	None	None	None	None	None	None	None	None	None	None	None	None	None	None	None	None	None	None	None	None	None	None
163.m06504	CNAG_01323	YDR529C	QCR7	SPCC737.02c	qcr7	orf19.5629	ca2764	QCR7	KOG3440	C	Ubiquinol cytochrome c reductase, subunit QCR7	ubiquinol-cytochrome-c reductase	Subunit 7 of the ubiquinol cytochrome-c reductase complex, which is a component of the mitochondrial inner membrane electron transport chain; oriented facing the mitochondrial matrix; N-terminus appears to play a role in complex assembly	ubiquinol-cytochrome-c reductase complex subunit 6	ubiquinol--cytochrome-c reductase subunit 7 (by homology)	None	None	None	None	Sce_HS-up_2.0	None	None	None	None	None	None	None	None	None	None	None	None	None	None	None	None	None	None	None	None	None	None	None	None	None	None	None	None	None
163.m06520	CNAG_01347	None	None	SPBC543.02c	None	orf19.3592	ca0872	IPF13100	KOG0624	V	dsRNA-activated protein kinase inhibitor P58, contains TPR and DnaJ domains	co-chaperone	None	DNAJ/TPR domain protein DNAJC7 family	unknown function	None	None	None	None	None	None	None	None	None	None	None	None	None	None	None	None	None	None	None	None	None	None	None	None	None	None	None	None	None	None	None	None	None	None
163.m06521	CNAG_01344	None	None	None	None	None	None	None	KOG1843	S	Uncharacterized conserved protein	conserved hypothetical protein	None	None	None	None	None	None	None	None	None	None	None	None	None	None	None	None	None	None	None	None	None	None	None	None	None	None	None	None	None	None	None	None	None	None	None	None	None
163.m06523	CNAG_01341	None	None	None	None	None	None	None	KOG1735	Z	Actin depolymerizing factor	mannose-6-phosphate isomerase	None	None	None	None	None	None	None	None	None	None	None	None	None	None	None	None	None	None	None	None	None	None	None	None	None	None	None	None	None	None	None	None	None	None	None	None	None
163.m06524	CNAG_01341	None	None	None	None	None	None	None	KOG1735	Z	Actin depolymerizing factor	mannose-6-phosphate isomerase	None	None	None	None	None	None	None	None	None	None	None	None	None	None	None	None	None	None	None	None	None	None	None	None	None	None	None	None	None	None	None	None	None	None	None	None	None
163.m06562	None	None	None	None	None	None	None	None	None	None	None	None	None	None	None	None	None	None	None	None	None	None	None	None	None	None	None	None	None	None	None	None	None	None	None	None	None	None	None	None	None	None	None	None	None	None	None	None	None
163.m06575	CNAG_00902	None	None	None	None	None	None	None	KOG4267	S	Predicted membrane protein	conserved hypothetical protein	None	None	None	None	None	None	None	None	None	None	None	None	None	None	None	None	None	None	None	None	None	None	None	None	None	None	None	None	None	None	None	None	None	None	None	None	None
163.m06577	CNAG_01185	YBR101C	FES1	SPBC3B9.01	None	orf19.3649	ca0147	IPF9690	KOG2160	O	Armadillo/beta-catenin-like repeat-containing protein	hsp70-like protein	Hsp70 (Ssa1p) nucleotide exchange factor, cytosolic homolog of Sil1p, which is the nucleotide exchange factor for BiP (Kar2p) in the endoplasmic reticulum	Hsp70 nucleotide exchange factor (predicted)	unknown function	None	None	None	None	Sce_HS-up_2.0	None	None	None	None	None	None	Spo_XS-dw_2.0	Spo_Cd-up_2.0	None	None	None	None	None	None	None	None	None	None	None	None	None	None	None	None	None	None	None	None	None
163.m06604	CNAG_07415	None	None	None	None	None	None	None	None	None	None	conserved hypothetical protein	None	None	None	None	None	None	None	None	None	None	None	None	None	None	None	None	None	None	None	None	None	None	None	None	None	None	None	None	None	None	None	None	None	None	None	None	None
164.m01516	CNAG_06116	None	None	None	None	None	None	None	KOG1110	R	Putative steroid membrane receptor Hpr6.6/25-Dx	conserved hypothetical protein	None	None	None	None	None	None	None	None	None	None	None	None	None	None	None	None	None	None	None	None	None	None	None	None	None	None	None	None	None	None	None	None	None	None	None	None	None
164.m01592	CNAG_00127	None	None	None	None	None	None	None	None	None	None	conserved hypothetical protein	None	None	None	None	None	None	None	None	None	None	None	None	None	None	None	None	None	None	None	None	None	None	None	None	None	None	None	None	None	None	None	None	None	None	None	None	None
164.m01643	CNAG_05998	None	None	None	None	None	None	None	KOG0393	R	Ras-related small GTPase, Rho type	rho GTPase	None	None	None	None	None	None	None	None	None	None	None	None	None	None	None	None	None	None	None	None	None	None	None	None	None	None	None	None	None	None	None	None	None	None	None	None	None
164.m01652	CNAG_06008	YDR321W	ASP1	SPAC977.12	None	None	None	None	KOG0503	E	Asparaginase	asparaginase	Cytosolic L-asparaginase, involved in asparagine catabolism	L-asparaginase (predicted)	None	None	None	None	Sce_XS-dw_2.0	None	Sce_HS-dw_2.0	None	None	None	None	None	Spo_XS-dw_2.0	None	None	None	None	None	None	None	None	None	None	None	None	None	None	None	None	None	None	None	None	None	None
164.m02001	CNAG_07703	None	None	None	None	None	None	None	None	None	None	conserved hypothetical protein	None	None	None	None	None	None	None	None	None	None	None	None	None	None	None	None	None	None	None	None	None	None	None	None	None	None	None	None	None	None	None	None	None	None	None	None	None
164.m02040	CNAG_06016	None	None	None	None	None	None	None	KOG2169	K	Zn-finger transcription factor	CAP6p	None	None	None	None	None	None	None	None	None	None	None	None	None	None	None	None	None	None	None	None	None	None	None	None	None	None	None	None	None	None	None	None	None	None	None	None	None
164.m02045	CNAG_06006	None	None	None	None	None	None	None	None	None	None	conserved hypothetical protein	None	None	None	None	None	None	None	None	None	None	None	None	None	None	None	None	None	None	None	None	None	None	None	None	None	None	None	None	None	None	None	None	None	None	None	None	None
164.m02100	CNAG_06114	YOR089C	VPS21	SPAC6F6.15	ypt5	orf19.589	ca3428	VPS21	KOG0092	U	GTPase Rab5/YPT51 and related small G protein superfamily GTPases	GTPase	GTPase required for transport during endocytosis and for correct sorting of vacuolar hydrolases; localized in endocytic intermediates; detected in mitochondria; geranylgeranylation required for membrane association; mammalian Rab5 homolog	GTPase Ypt5	GTP-binding protein (by homology)	None	None	None	None	None	None	None	None	None	None	None	None	None	None	None	None	None	None	None	None	None	None	None	None	None	None	None	None	Cal_XS-up_1.5	None	None	None	None	None
164.m02103	CNAG_06120	YDL142C	CRD1	None	None	orf19.6100	ca3856	IPF4641	KOG1617	I	CDP-alcohol phosphatidyltransferase/Phosphatidylglycerol-phosphate synthase	cardiolipin synthase	Cardiolipin synthase; produces cardiolipin, which is an important constituent of mitochondrial membranes; required for normal mitochondrial membrane potential and function	None	similar to Saccharomyces cerevisiae Crd1p cardiolipin synthase (by homology)	None	None	None	None	None	None	None	None	None	None	None	None	None	None	None	None	None	None	None	None	None	None	None	None	None	None	None	None	None	None	None	None	None	None
164.m02109	CNAG_06134	None	None	None	None	None	None	None	KOG4343	K	bZIP transcription factor ATF6	conserved hypothetical protein	None	None	None	None	None	None	None	None	None	None	None	None	None	None	None	None	None	None	None	None	None	None	None	None	None	None	None	None	None	None	None	None	None	None	None	None	None
164.m02124	CNAG_06150	YMR186W	HSC82	SPAC926.04c	hsp90	orf19.6515	ca4959	HSP90	KOG0019	O	Molecular chaperone (HSP90 family)	heat-shock protein 90	Cytoplasmic chaperone of the Hsp90 family, redundant in function and nearly identical with Hsp82p, and together they are essential; expressed constitutively at 10-fold higher basal levels than HSP82 and induced 2-3 fold by heat shock	heat shock protein Hsp90	heat shock protein	None	None	None	None	Sce_HS-up_2.0	None	None	None	None	None	None	Spo_XS-dw_2.0	None	None	None	None	None	None	None	None	None	None	None	None	None	None	None	None	None	None	None	None	Cal_Cd-up_1.5	None
164.m02126	CNAG_06143	None	None	SPBC13G1.04c	None	None	None	None	KOG2731	A	DNA alkylation damage repair protein	conserved hypothetical protein	None	alkB homolog	None	None	None	None	None	None	None	None	None	None	None	None	Spo_XS-dw_2.0	None	None	None	None	None	None	None	None	None	None	None	None	None	None	None	None	None	None	None	None	None	None
164.m02133	CNAG_06122	None	None	None	None	None	None	None	KOG2914	R	Predicted haloacid-halidohydrolase and related hydrolases	glycerol-1-phosphatase	None	None	None	None	None	None	None	None	None	None	None	None	None	None	None	None	None	None	None	None	None	None	None	None	None	None	None	None	None	None	None	None	None	None	None	None	None
164.m02135	CNAG_06118	None	None	SPBC582.10c	None	None	None	None	KOG1001	KL	Helicase-like transcription factor HLTF/DNA helicase RAD5, DEAD-box superfamily	conserved hypothetical protein	None	ATP-dependent DNA helicase Rhp16b (predicted)	None	None	None	None	None	None	None	None	None	None	None	None	None	None	None	None	None	None	None	None	None	None	None	None	None	None	None	None	None	None	None	None	None	None	None
164.m02137	CNAG_06170	YJL068C	None	None	None	orf19.6596	ca3836	IPF8179	None	None	None	carboxylesterase	None	None	putative esterase (by homology)	None	None	None	None	Sce_HS-up_2.0	None	None	None	None	None	None	None	None	None	None	None	None	None	None	None	None	None	None	None	None	None	None	None	None	None	None	None	None	None
164.m02140	CNAG_06179	YDL001W	RMD1	SPCC16C4.01	sif2	orf19.3158	ca1269	IPF19726	KOG2861	S	Uncharacterized conserved protein	cytoplasmic protein	Cytoplasmic protein required for sporulation	Sad1 interacting factor 2	unknown function	None	None	None	Sce_XS-dw_2.0	None	None	None	None	None	None	None	None	None	None	None	None	None	None	None	None	None	None	None	None	None	None	None	None	None	None	None	None	None	None
164.m02152	CNAG_06169	None	None	SPBC1198.01	None	None	None	None	KOG0024	Q	Sorbitol dehydrogenase	R,R	None	glutathione-dependent formaldehyde dehydrogenase (predicted)	None	None	None	None	None	None	None	None	None	None	None	Spo_XS-up_2.0	None	None	None	None	None	None	None	None	None	None	None	None	None	None	None	None	None	None	None	None	None	None	None
164.m02160	CNAG_06207	None	None	None	None	None	None	None	None	None	None	conserved hypothetical protein	None	None	None	None	None	None	None	None	None	None	None	None	None	None	None	None	None	None	None	None	None	None	None	None	None	None	None	None	None	None	None	None	None	None	None	None	None
164.m02173	CNAG_06220	None	None	None	None	None	None	None	KOG1721	R	1 FOG: Zn-finger	allergen	None	None	None	None	None	None	None	None	None	None	None	None	None	None	None	None	None	None	None	None	None	None	None	None	None	None	None	None	None	None	None	None	None	None	None	None	None
164.m02180	CNAG_06205	None	None	None	None	None	None	None	None	None	None	conserved hypothetical protein	None	None	None	None	None	None	None	None	None	None	None	None	None	None	None	None	None	None	None	None	None	None	None	None	None	None	None	None	None	None	None	None	None	None	None	None	None
164.m02184	CNAG_06235	YBR261C	None	SPAC16E8.14c	None	orf19.7069	ca5627	IPF495	KOG3178	R	Hydroxyindole-O-methyltransferase and related SAM-dependent methyltransferases	conserved hypothetical protein	None	methyltransferase (predicted)	unknown function	None	None	None	None	None	None	None	None	None	None	None	None	None	None	None	None	None	Cal_OS-dw	None	None	None	None	None	Cal_SSR.OS-dw	None	None	None	None	None	None	None	None	None	None
164.m02185	CNAG_06239	None	None	None	None	None	None	None	KOG1146	R	Homeobox protein	conserved hypothetical protein	None	None	None	None	None	None	None	None	None	None	None	None	None	None	None	None	None	None	None	None	None	None	None	None	None	None	None	None	None	None	None	None	None	None	None	None	None
164.m02187	CNAG_06242	None	None	None	None	orf19.7219	ca5345	FTR1	None	None	None	high-affinity iron permease CaFTR1	None	None	high affinity iron permease	None	None	None	None	None	None	None	None	None	None	None	None	None	None	None	None	None	None	None	None	None	None	None	None	None	None	None	None	None	None	None	None	None	None
164.m02196	CNAG_07836	None	None	SPACUNK4.17	None	None	None	None	None	None	None	NAD binding dehydrogenase family protein	None	NAD binding dehydrogenase family protein	None	None	None	None	None	None	None	None	None	Spo_OS-up_2.0	None	Spo_XS-up_2.0	None	Spo_Cd-up_2.0	None	Spo_CESR-up	None	None	None	None	None	None	None	None	None	None	None	None	None	None	None	None	None	None	None
164.m02204	CNAG_06246	None	None	None	None	None	None	None	KOG4475	RP	FOG: Immunoglobin and related proteins	conserved hypothetical protein	None	None	None	None	None	None	None	None	None	None	None	None	None	None	None	None	None	None	None	None	None	None	None	None	None	None	None	None	None	None	None	None	None	None	None	None	None
164.m02218	CNAG_04246	None	None	None	None	None	None	None	KOG2280	U	Vacuolar assembly/sorting protein VPS16	conserved hypothetical protein	None	None	None	None	None	None	None	None	None	None	None	None	None	None	None	None	None	None	None	None	None	None	None	None	None	None	None	None	None	None	None	None	None	None	None	None	None
164.m02792	CNAG_06034	None	None	SPBC1683.05	None	None	None	None	KOG2466	FH	Uridine permease/thiamine transporter/allantoin transport	allantoin permease	None	membrane transporter (predicted)	None	None	None	None	None	None	None	None	None	None	None	None	None	None	None	None	None	None	None	None	None	None	None	None	None	None	None	None	None	None	None	None	None	None	None
164.m02798	CNAG_06134	None	None	None	None	None	None	None	KOG4343	K	bZIP transcription factor ATF6	conserved hypothetical protein	None	None	None	None	None	None	None	None	None	None	None	None	None	None	None	None	None	None	None	None	None	None	None	None	None	None	None	None	None	None	None	None	None	None	None	None	None
164.m02802	CNAG_06159	None	None	None	None	None	None	None	None	None	None	conserved hypothetical protein	None	None	None	None	None	None	None	None	None	None	None	None	None	None	None	None	None	None	None	None	None	None	None	None	None	None	None	None	None	None	None	None	None	None	None	None	None
164.m02808	CNAG_07907	None	None	None	None	None	None	None	KOG1134	R	Uncharacterized conserved protein	conserved hypothetical protein	None	None	None	None	None	None	None	None	None	None	None	None	None	None	None	None	None	None	None	None	None	None	None	None	None	None	None	None	None	None	None	None	None	None	None	None	None
164.m02814	CNAG_06191	None	None	None	None	None	None	None	None	None	None	conserved hypothetical protein	None	None	None	None	None	None	None	None	None	None	None	None	None	None	None	None	None	None	None	None	None	None	None	None	None	None	None	None	None	None	None	None	None	None	None	None	None
164.m02822	CNAG_06232	YNL108C	None	None	None	orf19.6559	ca4874	IPF1674	None	None	None	TFC7	None	None	putative transcription initiation factor (by homology)	None	None	None	Sce_XS-dw_2.0	None	None	None	None	None	None	None	None	None	None	None	None	None	Cal_OS-dw	None	None	None	None	None	Cal_SSR.OS-dw	None	None	None	None	Cal_XS-up_1.5	None	Cal_XS-up_2.0	None	None	None
164.m02826	CNAG_06087	None	None	SPCC1020.02	spc7	orf19.4557	ca1529	SPC105.5eoc	None	None	None	conserved hypothetical protein	None	kinetochore protein Spc7	Spindle pole body protein (by homology)	None	None	None	None	None	None	None	None	None	None	None	None	None	None	None	None	None	None	None	None	None	None	None	None	None	None	None	None	None	None	None	None	None	None
164.m02830	CNAG_06109	None	None	None	None	None	None	None	KOG0845	YU	Nuclear pore complex, Nup98 component (sc Nup145/Nup100/Nup116)	conserved hypothetical protein	None	None	None	None	None	None	None	None	None	None	None	None	None	None	None	None	None	None	None	None	None	None	None	None	None	None	None	None	None	None	None	None	None	None	None	None	None
167.m03194	CNAG_02529	None	None	None	None	None	None	None	None	None	None	conserved hypothetical protein	None	None	None	None	None	None	None	None	None	None	None	None	None	None	None	None	None	None	None	None	None	None	None	None	None	None	None	None	None	None	None	None	None	None	None	None	None
167.m03257	CNAG_02458	YFL047W	RGD2	SPAC13A11.01c	rga8	orf19.730	ca3679	IPF20142	None	None	None	GTPase activating protein	GTPase-activating protein (RhoGAP) for Cdc42p and Rho5p	GTPase activating protein Rga8	unknown function	None	None	None	None	None	Sce_HS-dw_2.0	None	None	None	None	None	None	None	None	None	None	None	None	None	None	None	None	None	None	None	None	None	None	Cal_XS-up_1.5	None	None	None	None	None
167.m03310	CNAG_02399	YPL091W	GLR1	SPBC17A3.07	pgr1	orf19.4147	ca3086	GLR1	KOG0405	Q	Pyridine nucleotide-disulphide oxidoreductase	glutathione-disulfide reductase	Cytosolic and mitochondrial glutathione oxidoreductase, converts oxidized glutathione to reduced glutathione	glutathione reductase	by similarity to S. cerev. and C. albicans:glutathione reductase	None	None	Sce_XS-up_2.0	None	None	None	None	None	None	None	None	None	None	None	None	None	None	None	None	None	None	None	None	None	None	None	None	None	Cal_XS-up_1.5	None	Cal_XS-up_2.0	None	None	None
167.m03334	CNAG_02366	None	None	None	None	orf19.854	ca0773	UGA11.5f	KOG1405	E	4-aminobutyrate aminotransferase	4-aminobutyrate aminotransferase	None	None	4-aminobutyrate aminotransferase, exon 1 (by homology)	None	None	None	None	None	None	None	None	None	None	None	None	None	None	None	None	None	None	None	None	None	None	None	None	None	None	None	None	None	None	None	None	None	None
167.m03336	CNAG_02364	None	None	None	None	None	None	None	None	None	None	conserved hypothetical protein	None	None	None	None	None	None	None	None	None	None	None	None	None	None	None	None	None	None	None	None	None	None	None	None	None	None	None	None	None	None	None	None	None	None	None	None	None
167.m03404	CNAG_07635	YIL144W	TID3	SPBC11C11.03	ndc80	orf19.2827	ca0770	IPF10963	KOG0995	D	Centromere-associated protein HEC1	conserved hypothetical protein	Component of the evolutionarily conserved kinetochore-associated Ndc80 complex (Ndc80p-Nuf2p-Spc24p-Spc25p); conserved coiled-coil protein involved in chromosome segregation, spindle checkpoint activity, kinetochore assembly and clustering	spindle pole body protein Ndc80	unknown	Sce_OS-up_2.0	None	None	None	None	None	None	None	None	None	None	None	None	None	None	None	None	None	None	None	None	None	None	None	None	None	None	None	None	None	None	None	None	None
167.m03456	CNAG_02230	None	None	SPBC24C6.09c	None	None	None	None	None	None	None	phosphoketolase	None	phosphoketolase (predicted)	None	None	None	None	None	None	None	None	None	Spo_OS-up_2.0	None	Spo_XS-up_2.0	None	Spo_Cd-up_2.0	None	Spo_CESR-up	None	None	None	None	None	None	None	None	None	None	None	None	None	None	None	None	None	None	None
167.m03502	CNAG_02182	YOL151W	GRE2	SPAC513.07	None	orf19.5611	ca2963	GRP3	KOG1502	V	Flavonol reductase/cinnamoyl-CoA reductase	D-lactaldehyde dehydrogenase	3-methylbutanal reductase and NADPH-dependent methylglyoxal reductase (D-lactaldehyde dehydrogenase); stress induced (osmotic, ionic, oxidative, heat shock and heavy metals); regulated by the HOG pathway	flavonol reductase/cinnamoyl-CoA reductase family	dihydroflavonol-4-reductases (by homology)	Sce_OS-up_2.0	None	Sce_XS-up_2.0	None	Sce_HS-up_2.0	None	Sce_CSR-up_2.0	None	Spo_OS-up_2.0	None	Spo_XS-up_2.0	None	Spo_Cd-up_2.0	None	Spo_CESR-up	None	None	None	None	None	None	None	None	None	None	None	None	None	None	None	None	None	None	None
167.m03506	CNAG_02177	YDL188C	PPH22	SPBC16H5.07c	ppa2	orf19.1683	ca0425	PPH21	KOG0371	T	Serine/threonine protein phosphatase 2A, catalytic subunit	serine/threonine protein phosphatase PP2A catalytic subunit	Catalytic subunit of protein phosphatase 2A, functionally redundant with Pph21p; methylated at C terminus; forms alternate complexes with several regulatory subunits; involved in signal transduction and regulation of mitosis	serine/threonine protein phosphatase Ppa2	protein ser/thr phosphatase PP2A-1 (by homology)	None	None	None	None	None	None	None	None	None	None	Spo_XS-up_2.0	None	None	None	None	None	None	None	None	None	None	None	None	None	Cal_OS-up_1.5	None	None	None	None	None	None	None	None	None
167.m03538	CNAG_02143	None	None	None	None	None	None	None	KOG0017	R	FOG: Transposon-encoded proteins with TYA, reverse transcriptase, integrase domains in various combinations	conserved hypothetical protein	None	None	None	None	None	None	None	None	None	None	None	None	None	None	None	None	None	None	None	None	None	None	None	None	None	None	None	None	None	None	None	None	None	None	None	None	None
167.m03575	CNAG_02100	YPL231W	FAS2	SPAC4A8.11c	fas2	orf19.5949	ca6107	FAS2.3f	None	None	None	fatty-acid synthase complex protein	Alpha subunit of fatty acid synthetase, which catalyzes the synthesis of long-chain saturated fatty acids; contains beta-ketoacyl reductase and beta-ketoacyl synthase activities; phosphorylated	fatty acid synthase alpha subunit Lsd1	fatty-acyl-CoA synthase, alpha chain, 3-prime end	None	None	None	Sce_XS-dw_2.0	None	None	None	None	None	None	None	None	None	None	None	None	None	Cal_OS-dw	None	None	None	None	None	Cal_SSR.OS-dw	None	Cal_OS-dw_1.5	None	None	None	None	None	None	None	None
167.m03576	CNAG_02099	YKL182W	FAS1	SPAC926.09c	fas1	orf19.979	ca5426	FAS1	None	None	None	fatty acid synthase beta subunit	Beta subunit of fatty acid synthetase, which catalyzes the synthesis of long-chain saturated fatty acids; contains acetyltransacylase, dehydratase, enoyl reductase, malonyl transacylase, and palmitoyl transacylase activities	fatty acid synthase beta subunit Fas1	Fatty-acyl-CoA synthase, beta chain.	None	None	None	None	None	None	None	None	None	None	None	None	None	None	None	None	None	Cal_OS-dw	None	None	None	None	None	Cal_SSR.OS-dw	None	Cal_OS-dw_1.5	None	None	None	None	None	None	None	None
167.m03586	CNAG_02089	None	None	None	None	None	None	None	KOG4177	M	Ankyrin	conserved hypothetical protein	None	None	None	None	None	None	None	None	None	None	None	None	None	None	None	None	None	None	None	None	None	None	None	None	None	None	None	None	None	None	None	None	None	None	None	None	None
167.m03605	CNAG_02070	None	None	None	None	None	None	None	KOG1808	R	AAA ATPase containing von Willebrand factor type A (vWA) domain	conserved hypothetical protein	None	None	None	None	None	None	None	None	None	None	None	None	None	None	None	None	None	None	None	None	None	None	None	None	None	None	None	None	None	None	None	None	None	None	None	None	None
167.m03628	CNAG_02041	None	None	None	None	None	None	None	KOG1558	P	Fe2+/Zn2+ regulated transporter	conserved hypothetical protein	None	None	None	None	None	None	None	None	None	None	None	None	None	None	None	None	None	None	None	None	None	None	None	None	None	None	None	None	None	None	None	None	None	None	None	None	None
167.m03636	CNAG_02033	None	None	None	None	None	None	None	None	None	None	conserved hypothetical protein	None	None	None	None	None	None	None	None	None	None	None	None	None	None	None	None	None	None	None	None	None	None	None	None	None	None	None	None	None	None	None	None	None	None	None	None	None
167.m03638	CNAG_02030	None	None	None	None	None	None	None	None	None	None	glyoxal oxidase	None	None	None	None	None	None	None	None	None	None	None	None	None	None	None	None	None	None	None	None	None	None	None	None	None	None	None	None	None	None	None	None	None	None	None	None	None
167.m03643	CNAG_02024	None	None	None	None	None	None	None	None	None	None	conserved hypothetical protein	None	None	None	None	None	None	None	None	None	None	None	None	None	None	None	None	None	None	None	None	None	None	None	None	None	None	None	None	None	None	None	None	None	None	None	None	None
167.m03648	CNAG_02020	YGR002C	SWC4	SPAC9G1.13c	None	orf19.7492	ca5838	IPF424	KOG2656	BK	DNA methyltransferase 1-associated protein-1	SWR1-complex protein 4	Component of the Swr1p complex that incorporates Htz1p into chromatin; component of the NuA4 histone acetyltransferase complex	histone acetyltransferase complex subunit Swc4 (predicted)	unknown function	None	None	None	None	None	None	None	None	None	None	None	None	None	None	None	None	None	None	None	None	None	None	None	None	None	None	None	None	None	None	None	None	None	None
167.m03694	CNAG_02335	None	None	None	None	None	None	None	KOG3870	S	Uncharacterized conserved protein	UPF0364 protein	None	None	None	None	None	None	None	None	None	None	None	None	None	None	None	None	None	None	None	None	None	None	None	None	None	None	None	None	None	None	None	None	None	None	None	None	None
167.m03706	CNAG_02182	YOL151W	GRE2	SPAC513.07	None	orf19.5611	ca2963	GRP3	KOG1502	V	Flavonol reductase/cinnamoyl-CoA reductase	D-lactaldehyde dehydrogenase	3-methylbutanal reductase and NADPH-dependent methylglyoxal reductase (D-lactaldehyde dehydrogenase); stress induced (osmotic, ionic, oxidative, heat shock and heavy metals); regulated by the HOG pathway	flavonol reductase/cinnamoyl-CoA reductase family	dihydroflavonol-4-reductases (by homology)	Sce_OS-up_2.0	None	Sce_XS-up_2.0	None	Sce_HS-up_2.0	None	Sce_CSR-up_2.0	None	Spo_OS-up_2.0	None	Spo_XS-up_2.0	None	Spo_Cd-up_2.0	None	Spo_CESR-up	None	None	None	None	None	None	None	None	None	None	None	None	None	None	None	None	None	None	None
167.m03709	CNAG_02091	YKR048C	NAP1	SPCC364.06	nap1	orf19.7501	ca5845	NAP1	KOG1507	BD	Nucleosome assembly protein NAP-1	nucleosome assembly protein	Protein that interacts with mitotic cyclin Clb2p; required for the regulation of microtubule dynamics during mitosis; controls bud morphogenesis; involved in the transport of H2A and H2B histones to the nucleus; phosphorylated by CK2	nucleosome assembly protein Nap1 (predicted)	nucleosome assembly protein (by homology)	None	None	None	Sce_XS-dw_2.0	None	None	None	None	None	None	None	None	None	None	None	None	None	None	None	None	None	None	None	None	None	None	None	None	None	None	None	None	None	None
167.m05759	CNAG_02541	YGR233C	PHO81	None	None	orf19.7475	ca5821	PHO81	KOG0504	R	FOG: Ankyrin repeat	cyclin-dependent protein kinase inhibitor	Cyclin-dependent kinase (CDK) inhibitor, regulates Pho80p-Pho85p and Pcl7p-Pho85p cyclin-CDK complexes in response to phosphate levels; inhibitory activity for Pho80p-Pho85p requires myo-D-inositol heptakisphosphate (IP7) generated by Vip1p	None	Cyclin-dependent kinase inhibitor (by homology)	None	None	None	None	None	None	None	None	None	None	None	None	None	None	None	None	None	None	None	None	None	None	None	None	None	None	None	None	None	None	None	None	None	None
167.m05778	CNAG_06865	None	None	None	None	None	None	None	None	None	None	conserved hypothetical protein	None	None	None	None	None	None	None	None	None	None	None	None	None	None	None	None	None	None	None	None	None	None	None	None	None	None	None	None	None	None	None	None	None	None	None	None	None
167.m05809	CNAG_06871	None	None	SPCC757.04	None	None	None	None	None	None	None	conserved hypothetical protein	None	transcription factor (predicted)	None	None	None	None	None	None	None	None	None	None	None	Spo_XS-up_2.0	None	None	None	None	None	None	None	None	None	None	None	None	None	None	None	None	None	None	None	None	None	None	None
167.m05821	CNAG_07649	None	None	None	None	None	None	None	None	None	None	hypothetical protein	None	None	None	None	None	None	None	None	None	None	None	None	None	None	None	None	None	None	None	None	None	None	None	None	None	None	None	None	None	None	None	None	None	None	None	None	None
167.m05824	CNAG_02048	YLR142W	PUT1	SPCC70.03c	None	orf19.4274	ca1552	PUT1	KOG0186	E	Proline oxidase	proline dehydrogenase	Proline oxidase, nuclear-encoded mitochondrial protein involved in utilization of proline as sole nitrogen source; PUT1 transcription is induced by Put3p in the presence of proline and the absence of a preferred nitrogen source	proline dehydrogenase	proline oxidase (by homology)	None	None	None	None	Sce_HS-up_2.0	None	None	None	None	None	None	None	None	None	None	None	None	None	None	None	None	None	None	None	None	None	None	None	None	None	None	None	None	None
167.m05828	CNAG_02060	None	None	None	None	None	None	None	KOG2510	B	SWI-SNF chromatin-remodeling complex protein	conserved hypothetical protein	None	None	None	None	None	None	None	None	None	None	None	None	None	None	None	None	None	None	None	None	None	None	None	None	None	None	None	None	None	None	None	None	None	None	None	None	None
167.m05833	CNAG_02071	YNL233W	BNI4	None	None	orf19.4457	ca1366	IPF11847	None	None	None	conserved hypothetical protein	Targeting subunit for Glc7p protein phosphatase, localized to the bud neck, required for localization of chitin synthase III to the bud neck via interaction with the chitin synthase III regulatory subunit Skt5p	None	unknown function	None	None	None	None	None	None	None	None	None	None	None	None	None	None	None	None	None	None	None	None	None	None	None	None	None	None	None	None	None	None	None	None	None	None
167.m05840	CNAG_02135	None	None	None	None	None	None	None	None	None	None	conserved hypothetical protein	None	None	None	None	None	None	None	None	None	None	None	None	None	None	None	None	None	None	None	None	None	None	None	None	None	None	None	None	None	None	None	None	None	None	None	None	None
167.m05853	CNAG_02139	YHR001W	OSH7	SPCC23B6.01c	None	orf19.3198	ca0759	IPF11167	KOG2210	T	Oxysterol-binding protein	oxysterol-binding protein family	Member of an oxysterol-binding protein family with seven members in S. cerevisiae; family members have overlapping, redundant functions in sterol metabolism and collectively perform a function essential for viability	oxysterol binding protein (predicted)	unknown function	None	None	None	None	None	None	None	None	None	None	None	None	None	None	None	None	None	None	None	None	None	None	None	None	None	None	None	None	None	None	None	None	None	None
167.m05860	CNAG_02156	None	None	None	None	None	None	None	None	None	None	conserved hypothetical protein	None	None	None	None	None	None	None	None	None	None	None	None	None	None	None	None	None	None	None	None	None	None	None	None	None	None	None	None	None	None	None	None	None	None	None	None	None
167.m05887	CNAG_02267	None	None	None	None	None	None	None	KOG1036	D	Mitotic spindle checkpoint protein BUB3, WD repeat superfamily	spindle assembly checkpoint protein SLDB	None	None	None	None	None	None	None	None	None	None	None	None	None	None	None	None	None	None	None	None	None	None	None	None	None	None	None	None	None	None	None	None	None	None	None	None	None
167.m05890	CNAG_02260	None	None	SPCC1020.12c	None	None	None	None	KOG2894	S	Uncharacterized conserved protein XAP-5	family with sequence similarity 50	None	xap-5-like protein	None	None	None	None	None	None	None	None	None	None	None	None	None	None	None	None	None	None	None	None	None	None	None	None	None	None	None	None	None	None	None	None	None	None	None
167.m05922	CNAG_02362	None	None	None	None	None	None	None	None	None	None	conserved hypothetical protein	None	None	None	None	None	None	None	None	None	None	None	None	None	None	None	None	None	None	None	None	None	None	None	None	None	None	None	None	None	None	None	None	None	None	None	None	None
167.m05930	CNAG_07634	None	None	None	None	None	None	None	KOG4645	T	MAPKKK (MAP kinase kinase kinase) SSK2 and related serine/threonine protein kinases	conserved hypothetical protein	None	None	None	None	None	None	None	None	None	None	None	None	None	None	None	None	None	None	None	None	None	None	None	None	None	None	None	None	None	None	None	None	None	None	None	None	None
167.m05931	CNAG_07634	None	None	None	None	None	None	None	KOG4645	T	MAPKKK (MAP kinase kinase kinase) SSK2 and related serine/threonine protein kinases	conserved hypothetical protein	None	None	None	None	None	None	None	None	None	None	None	None	None	None	None	None	None	None	None	None	None	None	None	None	None	None	None	None	None	None	None	None	None	None	None	None	None
176.m02142	None	None	None	None	None	None	None	None	None	None	None	None	None	None	None	None	None	None	None	None	None	None	None	None	None	None	None	None	None	None	None	None	None	None	None	None	None	None	None	None	None	None	None	None	None	None	None	None	None
176.m02151	CNAG_06915	None	None	None	None	None	None	None	KOG2301	PT	Voltage-gated Ca2+ channels, alpha1 subunits	conserved hypothetical protein	None	None	None	None	None	None	None	None	None	None	None	None	None	None	None	None	None	None	None	None	None	None	None	None	None	None	None	None	None	None	None	None	None	None	None	None	None
176.m02200	CNAG_02566	YNL068C	FKH2	None	None	None	None	None	KOG2294	K	Transcription factor of the Forkhead/HNF3 family	hepatocyte nuclear factor	Forkhead family transcription factor with a major role in the expression of G2/M phase genes; positively regulates transcriptional elongation; negative role in chromatin silencing at HML and HMR; substrate of the Cdc28p/Clb5p kinase	None	None	None	None	None	None	None	Sce_HS-dw_2.0	None	None	None	None	None	None	None	None	None	None	None	None	None	None	None	None	None	None	None	None	None	None	None	None	None	None	None	None
176.m02203	CNAG_02573	None	None	None	None	None	None	None	KOG4308	S	LRR-containing protein	conserved hypothetical protein	None	None	None	None	None	None	None	None	None	None	None	None	None	None	None	None	None	None	None	None	None	None	None	None	None	None	None	None	None	None	None	None	None	None	None	None	None
176.m02209	CNAG_02577	YMR272C	SCS7	SPAC19G12.08	None	orf19.3822	ca4852	SCS7	KOG0539	I	Sphingolipid fatty acid hydroxylase	oxidoreductase	Sphingolipid alpha-hydroxylase, functions in the alpha-hydroxylation of sphingolipid-associated very long chain fatty acids, has both cytochrome b5-like and hydroxylase/desaturase domains, not essential for growth	fatty acid hydroxylase (predicted)	Required for hydroxylation of ceramide (by homology)	None	None	None	Sce_XS-dw_2.0	None	None	None	None	None	None	None	None	None	None	None	None	None	None	None	None	None	None	None	None	None	None	None	None	Cal_XS-up_1.5	None	None	None	None	None
176.m02212	CNAG_02580	None	None	None	None	None	None	None	None	None	None	conserved hypothetical protein	None	None	None	None	None	None	None	None	None	None	None	None	None	None	None	None	None	None	None	None	None	None	None	None	None	None	None	None	None	None	None	None	None	None	None	None	None
176.m02241	CNAG_07567	None	None	None	None	None	None	None	None	None	None	conserved hypothetical protein	None	None	None	None	None	None	None	None	None	None	None	None	None	None	None	None	None	None	None	None	None	None	None	None	None	None	None	None	None	None	None	None	None	None	None	None	None
176.m02246	CNAG_07563	YOL033W	MSE1	SPAPB1A10.11c	None	orf19.2415	None	None	KOG1149	J	Glutamyl-tRNA synthetase (mitochondrial)	glutamyl-tRNA synthetase	Mitochondrial glutamyl-tRNA synthetase, encoded by a nuclear gene	glutamyl-tRNA synthetase, mitochondrial	None	None	None	None	None	Sce_HS-up_2.0	None	None	None	None	None	None	None	None	None	None	None	None	None	None	None	None	None	None	None	None	None	None	None	None	None	None	None	None	None
176.m02258	CNAG_07552	None	None	None	None	None	None	None	KOG1001	KL	Helicase-like transcription factor HLTF/DNA helicase RAD5, DEAD-box superfamily	DNA repair protein rad8	None	None	None	None	None	None	None	None	None	None	None	None	None	None	None	None	None	None	None	None	None	None	None	None	None	None	None	None	None	None	None	None	None	None	None	None	None
176.m02261	CNAG_07550	None	None	None	None	orf19.5362	ca5514	IPF730	KOG1361	L	Predicted hydrolase involved in interstrand cross-link repair	conserved hypothetical protein	None	None	unknown function	None	None	None	None	None	None	None	None	None	None	None	None	None	None	None	None	None	None	None	None	None	None	None	None	None	None	None	None	None	None	None	None	None	None
176.m02273	CNAG_07537	YMR097C	MTG1	SPBC25B2.04c	None	orf19.2384	ca2101	IPF9364	KOG2485	R	Conserved ATP/GTP binding protein	mitochondrial GTPase 1	Peripheral GTPase of the mitochondrial inner membrane, essential for respiratory competence, likely functions in assembly of the large ribosomal subunit, has homologs in plants and animals	mitochondrial ribosome assembly protein	unknown function	None	None	Sce_XS-up_2.0	None	None	None	None	None	None	None	None	None	None	None	None	None	None	None	None	None	None	None	None	None	None	None	None	None	None	None	None	None	None	None
176.m02277	CNAG_07533	None	None	None	None	None	None	None	None	None	None	conserved hypothetical protein	None	None	None	None	None	None	None	None	None	None	None	None	None	None	None	None	None	None	None	None	None	None	None	None	None	None	None	None	None	None	None	None	None	None	None	None	None
176.m02285	CNAG_02656	YER007C-A	TMA20	SPBC31F10.12	None	orf19.2920	ca1801	IPF11444	KOG2523	J	Predicted RNA-binding protein with PUA domain	translation machinery-associated protein 20	Protein of unknown function that associates with ribosomes and has a putative RNA binding domain; interacts with Tma22p; null mutant exhibits translation defects; has homology to human oncogene MCT-1	RNA-binding protein Tma20 (predicted)	unknown function	None	None	None	None	None	None	None	None	None	None	None	None	None	None	None	None	None	None	None	None	None	None	None	None	None	None	None	None	None	None	None	None	None	None
176.m02299	CNAG_02673	None	None	None	None	None	None	None	KOG1502	V	Flavonol reductase/cinnamoyl-CoA reductase	NAD dependent epimerase/dehydratase family protein	None	None	None	None	None	None	None	None	None	None	None	None	None	None	None	None	None	None	None	None	None	None	None	None	None	None	None	None	None	None	None	None	None	None	None	None	None
176.m02310	CNAG_02684	None	None	None	None	None	None	None	KOG0670	A	U4/U6-associated splicing factor PRP4	conserved hypothetical protein	None	None	None	None	None	None	None	None	None	None	None	None	None	None	None	None	None	None	None	None	None	None	None	None	None	None	None	None	None	None	None	None	None	None	None	None	None
176.m02311	CNAG_02685	None	None	None	None	None	None	None	KOG1437	MW	Fasciclin and related adhesion glycoproteins	conserved hypothetical protein	None	None	None	None	None	None	None	None	None	None	None	None	None	None	None	None	None	None	None	None	None	None	None	None	None	None	None	None	None	None	None	None	None	None	None	None	None
176.m02313	CNAG_02687	None	None	None	None	None	None	None	KOG3417	T	Ras1 guanine nucleotide exchange factor	conserved hypothetical protein	None	None	None	None	None	None	None	None	None	None	None	None	None	None	None	None	None	None	None	None	None	None	None	None	None	None	None	None	None	None	None	None	None	None	None	None	None
176.m02316	CNAG_02690	None	None	None	None	orf19.2467	ca2891	IFS4	None	None	None	pirin	None	None	Pirin protein (by homology)	None	None	None	None	None	None	None	None	None	None	None	None	None	None	None	None	None	None	Cal_XS-up	None	None	None	Cal_SSR.XS-up	None	None	None	None	None	Cal_XS-up_1.5	None	Cal_XS-up_2.0	None	None	None
176.m02357	CNAG_01880	None	None	None	None	None	None	None	None	None	None	conserved hypothetical protein	None	None	None	None	None	None	None	None	None	None	None	None	None	None	None	None	None	None	None	None	None	None	None	None	None	None	None	None	None	None	None	None	None	None	None	None	None
176.m02393	CNAG_01916	YDR097C	MSH6	SPCC285.16c	msh6	orf19.4945	ca3705	MSH6	KOG0217	L	Mismatch repair ATPase MSH6 (MutS family)	DNA mismatch repair protein msh6	Protein required for mismatch repair in mitosis and meiosis, forms a complex with Msh2p to repair both single-base & insertion-deletion mispairs; potentially phosphorylated by Cdc28p	MutS protein homolog	DNA mismatch repair protein by homology	None	Sce_OS-dw_2.0	None	Sce_XS-dw_2.0	None	Sce_HS-dw_2.0	None	Sce_CSR-dw_2.0	None	None	None	None	None	None	None	None	None	None	None	None	None	None	None	None	None	None	None	None	None	Cal_XS-dw_1.5	None	None	None	None
176.m02396	CNAG_01920	YLL039C	UBI4	SPBC337.08c	ubi4	orf19.6771	ca5932	UBI4	KOG0001	OR	Ubiquitin and ubiquitin-like proteins	polyubiquitin	Ubiquitin, becomes conjugated to proteins, marking them for selective degradation via the ubiquitin-26S proteasome system; essential for the cellular stress response; encoded as a polyubiquitin precursor comprised of 5 head-to-tail repeats	ubiquitin	Polyubiquitin	Sce_OS-up_2.0	None	Sce_XS-up_2.0	None	Sce_HS-up_2.0	None	Sce_CSR-up_2.0	None	None	None	Spo_XS-up_2.0	None	None	None	None	None	None	None	None	None	None	None	None	None	None	None	None	None	None	None	None	None	None	None
176.m02407	CNAG_01936	None	None	None	None	None	None	None	KOG0254	R	Predicted transporter (major facilitator superfamily)	sugar transporter	None	None	None	None	None	None	None	None	None	None	None	None	None	None	None	None	None	None	None	None	None	None	None	None	None	None	None	None	None	None	None	None	None	None	None	None	None
176.m02461	CNAG_02001	None	None	None	None	None	None	None	KOG0565	U	Inositol polyphosphate 5-phosphatase and related proteins	inositol-polyphosphate 5-phosphatase	None	None	None	None	None	None	None	None	None	None	None	None	None	None	None	None	None	None	None	None	None	None	None	None	None	None	None	None	None	None	None	None	None	None	None	None	None
176.m02465	CNAG_02005	None	None	None	None	None	None	None	KOG1999	K	RNA polymerase II transcription elongation factor DSIF/SUPT5H/SPT5	conserved hypothetical protein	None	None	None	None	None	None	None	None	None	None	None	None	None	None	None	None	None	None	None	None	None	None	None	None	None	None	None	None	None	None	None	None	None	None	None	None	None
176.m02468	CNAG_02008	None	None	None	None	None	None	None	KOG3346	R	Phosphatidylethanolamine binding protein	nuclear protein	None	None	None	None	None	None	None	None	None	None	None	None	None	None	None	None	None	None	None	None	None	None	None	None	None	None	None	None	None	None	None	None	None	None	None	None	None
176.m02472	CNAG_02012	None	None	None	None	None	None	None	KOG0134	CR	NADH:flavin oxidoreductase/12-oxophytodienoate reductase	TPR domain-containing protein	None	None	None	None	None	None	None	None	None	None	None	None	None	None	None	None	None	None	None	None	None	None	None	None	None	None	None	None	None	None	None	None	None	None	None	None	None
176.m02498	CNAG_06917	YBL064C	PRX1	None	None	orf19.5180	ca4416	IPF11888	None	None	None	thiol-specific antioxidant protein 3	Mitochondrial peroxiredoxin (1-Cys Prx) with thioredoxin peroxidase activity, has a role in reduction of hydroperoxides; induced during respiratory growth and under conditions of oxidative stress; phosphorylated	None	unknown function	Sce_OS-up_2.0	None	Sce_XS-up_2.0	None	Sce_HS-up_2.0	None	Sce_CSR-up_2.0	None	None	None	None	None	None	None	None	None	None	None	None	None	None	None	None	None	None	None	None	None	None	None	None	None	Cal_Cd-up_1.5	None
176.m02521	None	None	None	None	None	None	None	None	None	None	None	None	None	None	None	None	None	None	None	None	None	None	None	None	None	None	None	None	None	None	None	None	None	None	None	None	None	None	None	None	None	None	None	None	None	None	None	None	None
176.m02525	CNAG_07534	None	None	SPCC285.14	None	orf19.1265	ca3462	IPF14959	KOG1931	R	Putative transmembrane protein	conserved hypothetical protein	None	TRAPP complex subunit Trs130 (predicted)	similar to Saccharomyces cerevisiae Trs130p TRAPP subunit of 130 kDa involved in targeting and fusion of ER to golgi transport vesicles (by homology)	None	None	None	None	None	None	None	None	None	None	None	None	None	None	None	None	None	None	None	None	None	None	None	None	None	None	None	None	None	Cal_XS-dw_1.5	None	None	None	None
176.m02553	None	None	None	None	None	None	None	None	None	None	None	None	None	None	None	None	None	None	None	None	None	None	None	None	None	None	None	None	None	None	None	None	None	None	None	None	None	None	None	None	None	None	None	None	None	None	None	None	None
176.m02568	CNAG_01988	YIL147C	SLN1	None	None	None	None	None	KOG0519	T	Sensory transduction histidine kinase	bacteriophytochrome histidine kinase	Histidine kinase osmosensor that regulates a MAP kinase cascade; transmembrane protein with an intracellular kinase domain that signals to Ypd1p and Ssk1p, thereby forming a phosphorelay system similar to bacterial two-component regulators	None	None	None	None	None	Sce_XS-dw_2.0	None	None	None	None	None	None	None	None	None	None	None	None	None	None	None	None	None	None	None	None	None	None	None	None	None	None	None	None	None	None
176.m02573	CNAG_07556	None	None	None	None	None	None	None	KOG3736	O	Polypeptide N-acetylgalactosaminyltransferase	conserved hypothetical protein	None	None	None	None	None	None	None	None	None	None	None	None	None	None	None	None	None	None	None	None	None	None	None	None	None	None	None	None	None	None	None	None	None	None	None	None	None
176.m02583	CNAG_01969	None	None	SPAC17A5.04c	mde10	None	None	None	KOG3607	O	Meltrins, fertilins and related Zn-dependent metalloproteinases of the ADAMs family	zinc metalloprotease	None	spore wall assembly peptidase Mde10	None	None	None	None	None	None	None	None	None	None	None	None	None	None	None	None	None	None	None	None	None	None	None	None	None	None	None	None	None	None	None	None	None	None	None
176.m02584	CNAG_01980	None	None	None	None	None	None	None	None	None	None	conserved hypothetical protein	None	None	None	None	None	None	None	None	None	None	None	None	None	None	None	None	None	None	None	None	None	None	None	None	None	None	None	None	None	None	None	None	None	None	None	None	None
176.m02590	CNAG_01994	None	None	None	None	None	None	None	KOG2084	B	Predicted histone tail methylase containing SET domain	conserved hypothetical protein	None	None	None	None	None	None	None	None	None	None	None	None	None	None	None	None	None	None	None	None	None	None	None	None	None	None	None	None	None	None	None	None	None	None	None	None	None
177.m02858	CNAG_06968	None	None	None	None	None	None	None	KOG1808	R	AAA ATPase containing von Willebrand factor type A (vWA) domain	hypothetical protein	None	None	None	None	None	None	None	None	None	None	None	None	None	None	None	None	None	None	None	None	None	None	None	None	None	None	None	None	None	None	None	None	None	None	None	None	None
177.m02860	None	None	None	None	None	None	None	None	None	None	None	None	None	None	None	None	None	None	None	None	None	None	None	None	None	None	None	None	None	None	None	None	None	None	None	None	None	None	None	None	None	None	None	None	None	None	None	None	None
177.m02862	CNAG_07752	None	None	None	None	None	None	None	None	None	None	UDP-galactopyranose mutase	None	None	None	None	None	None	None	None	None	None	None	None	None	None	None	None	None	None	None	None	None	None	None	None	None	None	None	None	None	None	None	None	None	None	None	None	None
177.m02868	CNAG_03592	YOL055C	THI20	SPBP8B7.18c	None	orf19.889	ca4681	IPF3679	KOG2598	HK	Phosphomethylpyrimidine kinase	phosphomethylpyrimidine kinase	Multifunctional protein with both hydroxymethylpyrimidine kinase and thiaminase activities; involved in thiamine biosynthesis and also in thiamine degradation; member of a gene family with THI21 and THI22; functionally redundant with Thi21p	phosphomethylpyrimidine kinase (predicted)	similar to Saccharomyces cerevisiae Thi20p hydroxymethylpyrimidine phosphate (HMP-P) kinase (by homology)	None	None	None	None	Sce_HS-up_2.0	Sce_HS-dw_2.0	None	None	None	None	None	None	None	None	None	None	None	None	None	None	None	None	None	None	None	None	None	None	None	None	None	None	None	None
177.m02875	CNAG_03585	None	None	SPAC25H1.02	jmj1	None	None	None	KOG2131	BT	Uncharacterized conserved protein, contains JmjC domain	JmjC domain-containing protein 4	None	Jmj1 protein	None	None	None	None	None	None	None	None	None	Spo_OS-up_2.0	None	Spo_XS-up_2.0	None	Spo_Cd-up_2.0	None	Spo_CESR-up	None	None	None	None	None	None	None	None	None	None	None	None	None	None	None	None	None	None	None
177.m02886	CNAG_03573	None	None	None	None	None	None	None	KOG2614	CR	Kynurenine 3-monooxygenase and related flavoprotein monooxygenases	kynurenine 3-monooxygenase	None	None	None	None	None	None	None	None	None	None	None	None	None	None	None	None	None	None	None	None	None	None	None	None	None	None	None	None	None	None	None	None	None	None	None	None	None
177.m02887	CNAG_03572	None	None	None	None	None	None	None	None	None	None	opsin 1	None	None	None	None	None	None	None	None	None	None	None	None	None	None	None	None	None	None	None	None	None	None	None	None	None	None	None	None	None	None	None	None	None	None	None	None	None
177.m02907	CNAG_03541	YHR076W	PTC7	SPAC1556.03	azr1	orf19.5661	ca4370	IPF5279	KOG1379	T	Serine/threonine protein phosphatase	conserved hypothetical protein	Mitochondrially localized type 2C protein phosphatase; expression induced by growth on ethanol and by sustained osmotic stress; possible role in carbon source utilization in low oxygen environments	serine/threonine protein phosphatase Azr1	unknown function	None	None	None	None	None	None	None	None	None	None	None	None	None	None	None	None	None	None	None	None	None	None	None	None	None	None	None	None	None	None	None	None	None	None
177.m02914	CNAG_03533	YER051W	JHD1	SPCC622.16c	epe1	orf19.3281	ca5469	IPF298	KOG1633	B	F-box protein JEMMA and related proteins with JmjC, PHD, F-box and LRR domains	JmjC domain-containing histone demethylation protein 1	JmjC domain family histone demethylase specific for H3-K36, similar to proteins found in human, mouse, drosophila, X. laevis, C. elegans, and S. pombe	Jmjc domain chromatin associated protein Epe1	unknown function	None	None	None	None	None	None	None	None	None	None	None	None	None	None	None	None	None	None	None	None	None	None	None	None	None	None	None	None	Cal_XS-up_1.5	None	None	None	None	None
177.m02950	CNAG_03492	None	None	None	None	None	None	None	KOG1217	T	Fibrillins and related proteins containing Ca2+-binding EGF-like domains	conserved hypothetical protein	None	None	None	None	None	None	None	None	None	None	None	None	None	None	None	None	None	None	None	None	None	None	None	None	None	None	None	None	None	None	None	None	None	None	None	None	None
177.m02979	CNAG_03459	YDL143W	CCT4	SPBC106.06	cct4	orf19.2720	ca1273	CCT4	KOG0358	O	Chaperonin complex component, TCP-1 delta subunit (CCT4)	t-complex protein 1	Subunit of the cytosolic chaperonin Cct ring complex, related to Tcp1p, required for the assembly of actin and tubulins in vivo	chaperonin-containing T-complex delta subunit Cct4	Component of chaperonin-containing T-complex	None	None	None	None	None	None	None	None	None	None	None	None	None	None	None	None	None	None	None	None	None	None	None	None	None	None	None	None	None	Cal_XS-dw_1.5	None	None	None	None
177.m02982	CNAG_03456	None	None	SPCC1393.09c	None	None	None	None	KOG4018	S	Uncharacterized conserved protein, contains RWD domain	conserved hypothetical protein	None	RWD domain	None	None	None	None	None	None	None	None	None	None	None	None	None	None	None	None	None	None	None	None	None	None	None	None	None	None	None	None	None	None	None	None	None	None	None
177.m02985	CNAG_03452	YEL052W	AFG1	SPBC115.02c	None	orf19.2891	ca3775	AFG1	KOG2383	R	Predicted ATPase	AFG1 family mitochondrial ATPase	Conserved protein that may act as a chaperone in the degradation of misfolded or unassembled cytochrome c oxidase subunits; localized to matrix face of the mitochondrial inner membrane; member of the AAA family but lacks a protease domain	AFG1 family mitochondrial ATPase	ATPase family gene (by homology)	None	None	None	None	None	None	None	None	None	None	None	None	None	None	None	None	None	None	None	None	None	None	None	None	None	None	None	None	None	None	None	None	None	None
177.m03025	CNAG_03408	None	None	None	None	None	None	None	KOG1808	R	AAA ATPase containing von Willebrand factor type A (vWA) domain	conserved hypothetical protein	None	None	None	None	None	None	None	None	None	None	None	None	None	None	None	None	None	None	None	None	None	None	None	None	None	None	None	None	None	None	None	None	None	None	None	None	None
177.m03047	CNAG_03385	YDL127W	PCL2	None	None	orf19.2649	ca0384	PCL1	KOG1674	R	Cyclin	g1/s-specific cyclin pcl1	G1 cyclin, associates with Pho85p cyclin-dependent kinase (Cdk) to contribute to entry into the mitotic cell cycle, essential for cell morphogenesis; localizes to sites of polarized cell growth	None	cyclin, G1/S-specific (by homology)	None	None	None	None	None	None	None	None	None	None	None	None	None	None	None	None	None	None	None	None	None	None	None	None	None	None	None	None	None	None	None	None	None	None
177.m03088	CNAG_03332	YOL094C	RFC4	SPAC1687.03c	rfc4	orf19.7658	ca6043	RFC4	KOG0991	L	Replication factor C, subunit RFC2	activator 1 40 kDa subunit	Subunit of heteropentameric Replication factor C (RF-C), which is a DNA binding protein and ATPase that acts as a clamp loader of the proliferating cell nuclear antigen (PCNA) processivity factor for DNA polymerases delta and epsilon	DNA replication factor C complex subunit Rfc4 (predicted)	DNA replication factor C (by homology)	None	None	None	None	None	Sce_HS-dw_2.0	None	None	None	None	None	None	None	None	None	None	None	None	None	None	None	None	None	None	None	None	None	None	None	None	None	None	None	None
177.m03097	CNAG_03322	None	None	SPBPB2B2.11	None	orf19.3674	ca4043	IPF5291	KOG1429	GM	dTDP-glucose 4-6-dehydratase/UDP-glucuronic acid decarboxylase	UDP-xylose synthase	None	nucleotide-sugar 4,6-dehydratase (predicted)	UDP-glucose 4-epimerase (by homology)	None	None	None	None	None	None	None	None	None	None	Spo_XS-up_2.0	None	None	None	None	None	None	None	None	None	None	None	None	None	None	None	None	None	None	None	None	None	None	None
177.m03105	CNAG_03314	YDR374C	None	None	None	orf19.1939	ca3359	IPF9566	KOG1901	R	Uncharacterized high-glucose-regulated protein	YTH domain family 2	None	None	unknown function	Sce_OS-up_2.0	None	Sce_XS-up_2.0	None	Sce_HS-up_2.0	None	Sce_CSR-up_2.0	None	None	None	None	None	None	None	None	None	None	None	None	None	None	None	None	None	None	None	None	None	None	None	None	None	None	None
177.m03129	CNAG_03286	YOR016C	ERP4	SPAC17A5.08	None	orf19.3558	ca0581	IPF3181	KOG1693	U	emp24/gp25L/p24 family of membrane trafficking proteins	erp2,4	Protein with similarity to Emp24p and Erv25p, member of the p24 family involved in ER to Golgi transport	COPII-coated vesicle component Erp2/3/4 (predicted)	similar to Saccharomyces cerevisiae Erp3p p24 protein involved in membrane trafficking (by homology)	None	None	None	None	None	None	None	None	None	None	None	None	None	None	None	None	None	None	None	None	None	None	None	None	None	None	None	None	None	Cal_XS-dw_1.5	None	None	None	None
177.m03164	CNAG_03248	YOR134W	BAG7	SPBC17F3.01c	rga5	orf19.7115	ca5584	SAC7	KOG2710	TZ	Rho GTPase-activating protein	rho GTPase activator	Rho GTPase activating protein (RhoGAP), stimulates the intrinsic GTPase activity of Rho1p, which plays a role in actin cytoskeleton organization and control of cell wall synthesis; structurally and functionally related to Sac7p	GTPase activating protein Rga5	GAP for RHO1 by homology	Sce_OS-up_2.0	None	Sce_XS-up_2.0	None	Sce_HS-up_2.0	None	Sce_CSR-up_2.0	None	None	None	None	None	None	None	None	None	None	None	None	None	None	Cal_HS-dw	None	Cal_SSR.HS-dw	None	None	None	None	None	None	None	None	None	None
177.m03188	CNAG_03226	YLL041C	SDH2	SPAC140.01	sdh2	orf19.637	ca1845	IPF11123	KOG3049	C	Succinate dehydrogenase, Fe-S protein subunit	succinate dehydrogenase iron-sulfur subunit	Iron-sulfur protein subunit of succinate dehydrogenase (Sdh1p, Sdh2p, Sdh3p, Sdh4p), which couples the oxidation of succinate to the transfer of electrons to ubiquinone	succinate dehydrogenase (ubiquinone) iron-sulfur protein subunit	similar to Saccharomyces cerevisiae Sdh2p succinate dehydrogenase iron-sulfur protein subunit (by homology)	None	None	None	None	Sce_HS-up_2.0	None	None	None	None	None	None	Spo_XS-dw_2.0	None	None	None	None	None	None	None	None	None	None	None	None	None	None	None	None	None	None	None	None	None	None
177.m03190	CNAG_03223	None	None	SPCC1322.10	None	None	None	None	None	None	None	hypothetical protein	None	conserved fungal protein	None	None	None	None	None	None	None	None	None	None	None	None	None	None	None	None	None	None	None	None	None	None	None	None	None	None	None	None	None	None	None	None	None	None	None
177.m03194	CNAG_07719	YKL145W	RPT1	SPBC16C6.07c	rpt1	orf19.441	ca4064	RPT1	KOG0729	O	26S proteasome regulatory complex, ATPase RPT1	endopeptidase	One of six ATPases of the 19S regulatory particle of the 26S proteasome involved in the degradation of ubiquitinated substrates; required for optimal CDC20 transcription; interacts with Rpn12p and the E3 ubiquitin-protein ligase Ubr1p	19S proteasome regulatory subunit Rpt1 (predicted)	26S PROTEASE REGULATORY SUBUNIT 7 (by homology)	None	None	None	None	None	None	None	None	None	None	None	None	None	None	None	None	None	None	None	None	None	None	None	None	None	None	None	None	None	None	None	None	None	None
177.m03200	CNAG_03213	None	None	SPBC19C7.09c	uve1	None	None	None	None	None	None	UV-endonuclease UVE-1	None	endonuclease Uve1	None	None	None	None	None	None	None	None	None	None	None	Spo_XS-up_2.0	None	None	None	None	None	None	None	None	None	None	None	None	None	None	None	None	None	None	None	None	None	None	None
177.m03215	CNAG_03191	YGL003C	CDH1	SPAC144.13c	srw1	orf19.2084	ca4815	CDH1	KOG0305	DO	Anaphase promoting complex, Cdc20, Cdh1, and Ama1 subunits	FZR1 protein	Cell-cycle regulated activator of the anaphase-promoting complex/cyclosome (APC/C), which directs ubiquitination of cyclins resulting in mitotic exit; targets the APC/C to specific substrates including CDC20, ASE1, CIN8 and FIN1	CDK inhibitor Srw1	Substrate-specific activator of APC-dependent proteolysis (by homology)	None	None	None	None	None	None	None	None	None	None	None	None	None	None	None	None	None	None	None	None	None	None	None	None	None	None	None	None	None	None	None	None	None	None
177.m03217	CNAG_03189	YPR089W	None	SPAC25B8.08	None	orf19.757	ca0049	IPF3908	None	None	None	DIL and Ankyrin domain-containing protein	None	conserved fungal family	unknown function	None	None	None	None	None	None	None	None	None	None	Spo_XS-up_2.0	None	None	None	None	None	None	None	None	None	None	None	None	None	None	None	None	None	None	Cal_XS-dw_1.5	None	None	None	None
177.m03226	CNAG_07715	None	None	None	None	None	None	None	KOG1142	K	Transcription initiation factor TFIID, subunit TAF12 (also component of histone acetyltransferase SAGA)	conserved hypothetical protein	None	None	None	None	None	None	None	None	None	None	None	None	None	None	None	None	None	None	None	None	None	None	None	None	None	None	None	None	None	None	None	None	None	None	None	None	None
177.m03234	CNAG_03172	None	None	None	None	None	None	None	None	None	None	conserved hypothetical protein	None	None	None	None	None	None	None	None	None	None	None	None	None	None	None	None	None	None	None	None	None	None	None	None	None	None	None	None	None	None	None	None	None	None	None	None	None
177.m03236	CNAG_03170	None	None	None	None	None	None	None	KOG2683	BK	Sirtuin 4 and related class II sirtuins (SIR2 family)	conserved hypothetical protein	None	None	None	None	None	None	None	None	None	None	None	None	None	None	None	None	None	None	None	None	None	None	None	None	None	None	None	None	None	None	None	None	None	None	None	None	None
177.m03264	CNAG_03143	YFL014W	HSP12	None	None	orf19.3160	ca0627	HSP12	None	None	None	conserved hypothetical protein	Plasma membrane localized protein that protects membranes from desiccation; induced by heat shock, oxidative stress, osmostress, stationary phase entry, glucose depletion, oleate and alcohol; regulated by the HOG and Ras-Pka pathways	None	Heat shock protein (by homology)	Sce_OS-up_2.0	None	Sce_XS-up_2.0	None	Sce_HS-up_2.0	None	Sce_CSR-up_2.0	None	None	None	None	None	None	None	None	None	None	None	None	None	None	None	None	None	Cal_OS-up_1.5	None	Cal_OS-up_2.0	None	None	None	None	None	Cal_Cd-up_1.5	None
177.m03265	CNAG_03142	None	None	None	None	None	None	None	None	None	None	conserved hypothetical protein	None	None	None	None	None	None	None	None	None	None	None	None	None	None	None	None	None	None	None	None	None	None	None	None	None	None	None	None	None	None	None	None	None	None	None	None	None
177.m03274	CNAG_07712	YPL015C	HST2	SPCC132.02	hst2	orf19.2580	ca2686	HST2	KOG2682	BK	NAD-dependent histone deacetylases and class I sirtuins (SIR2 family)	NAD-dependent histone deacetylase	Cytoplasmic member of the silencing information regulator 2 (Sir2) family of NAD(+)-dependent protein deacetylases; modulates nucleolar (rDNA) and telomeric silencing; possesses NAD(+)-dependent histone deacetylase activity in vitro	Sir2 family histone deacetylase Hst2	Transcription regulatory protein	None	None	None	None	None	None	None	None	None	None	None	None	None	None	None	None	None	None	None	None	None	None	None	None	None	None	None	None	None	None	None	None	None	None
177.m03275	CNAG_03130	None	None	None	None	None	None	None	KOG0393	R	Ras-related small GTPase, Rho type	signal transducer	None	None	None	None	None	None	None	None	None	None	None	None	None	None	None	None	None	None	None	None	None	None	None	None	None	None	None	None	None	None	None	None	None	None	None	None	None
177.m03280	CNAG_03124	YCR057C	PWP2	SPBC713.04c	None	orf19.3276	ca5466	PWP2	KOG0291	A	WD40-repeat-containing subunit of the 18S rRNA processing complex	WD repeat protein	Conserved 90S pre-ribosomal component essential for proper endonucleolytic cleavage of the 35 S rRNA precursor at A0, A1, and A2 sites; contains eight WD-repeats; PWP2 deletion leads to defects in cell cycle and bud morphogenesis	U3 snoRNP-associated protein Utp1	periodic tryptophan protein (by homology)	None	None	None	Sce_XS-dw_2.0	None	Sce_HS-dw_2.0	None	None	None	None	None	None	None	None	None	None	None	Cal_OS-dw	None	None	None	Cal_HS-dw	None	None	None	Cal_OS-dw_1.5	None	Cal_OS-dw_2.0	None	Cal_XS-dw_1.5	None	None	None	Cal_Cd-dw_1.5
177.m03281	CNAG_03123	None	None	None	None	None	None	None	None	None	None	conserved hypothetical protein	None	None	None	None	None	None	None	None	None	None	None	None	None	None	None	None	None	None	None	None	None	None	None	None	None	None	None	None	None	None	None	None	None	None	None	None	None
177.m03285	CNAG_03118	None	None	None	None	None	None	None	KOG1994	A	Predicted RNA binding protein, contains G-patch and Zn-finger domains	conserved hypothetical protein	None	None	None	None	None	None	None	None	None	None	None	None	None	None	None	None	None	None	None	None	None	None	None	None	None	None	None	None	None	None	None	None	None	None	None	None	None
177.m03302	CNAG_03099	None	None	None	None	None	None	None	KOG2571	M	Chitin synthase/hyaluronan synthase (glycosyltransferases)	chitin synthase 1	None	None	None	None	None	None	None	None	None	None	None	None	None	None	None	None	None	None	None	None	None	None	None	None	None	None	None	None	None	None	None	None	None	None	None	None	None
177.m03311	CNAG_03566	None	None	None	None	None	None	None	None	None	None	conserved hypothetical protein	None	None	None	None	None	None	None	None	None	None	None	None	None	None	None	None	None	None	None	None	None	None	None	None	None	None	None	None	None	None	None	None	None	None	None	None	None
177.m03313	CNAG_07745	YMR083W	ADH3	None	None	orf19.3997	ca4765	ADH1	KOG0023	Q	Alcohol dehydrogenase, class V	mannitol-1-phosphate dehydrogenase	Mitochondrial alcohol dehydrogenase isozyme III; involved in the shuttling of mitochondrial NADH to the cytosol under anaerobic conditions and ethanol production	None	alcohol dehydrogenase (by homology)	None	None	None	None	None	None	None	None	None	None	None	None	None	None	None	None	None	None	None	Cal_XS-dw	None	None	None	Cal_SSR.XS-dw	None	None	None	None	None	None	None	None	None	None
177.m03314	CNAG_03529	None	None	None	None	None	None	None	None	None	None	conserved hypothetical protein	None	None	None	None	None	None	None	None	None	None	None	None	None	None	None	None	None	None	None	None	None	None	None	None	None	None	None	None	None	None	None	None	None	None	None	None	None
177.m03316	CNAG_03493	None	None	SPBC106.11c	plg7	None	None	None	KOG3847	I	Phospholipase A2 (platelet-activating factor acetylhydrolase in humans)	platelet-activating factor acetylhydrolase	None	phospholipase A2 (predicted)	None	None	None	None	None	None	None	None	None	None	None	Spo_XS-up_2.0	None	Spo_Cd-up_2.0	None	None	None	None	None	None	None	None	None	None	None	None	None	None	None	None	None	None	None	None	None
177.m03363	CNAG_03566	None	None	None	None	None	None	None	None	None	None	conserved hypothetical protein	None	None	None	None	None	None	None	None	None	None	None	None	None	None	None	None	None	None	None	None	None	None	None	None	None	None	None	None	None	None	None	None	None	None	None	None	None
177.m03373	CNAG_03544	None	None	None	None	orf19.6607	ca3847	IPF7942	None	None	None	conserved hypothetical protein	None	None	NADH-ubiquinone oxidoreductase	None	None	None	None	None	None	None	None	None	None	None	None	None	None	None	None	None	None	None	None	None	None	None	None	None	None	None	None	None	None	None	None	None	None
177.m03377	CNAG_03520	None	None	SPAC9G1.08c	None	None	None	None	KOG2112	I	Lysophospholipase	conserved hypothetical protein	None	phospholipase (predicted)	None	None	None	None	None	None	None	None	None	None	None	None	None	None	None	None	None	None	None	None	None	None	None	None	None	None	None	None	None	None	None	None	None	None	None
177.m03381	CNAG_03463	YPL004C	LSP1	None	None	orf19.3149	ca0622	IPF14171	None	None	None	conserved hypothetical protein	Primary component of eisosomes, which are large immobile patch structures at the cell cortex associated with endocytosis, along with Pil1p and Sur7p; null mutants show activation of Pkc1p/Ypk1p stress resistance pathways	None	unknown function	None	None	Sce_XS-up_2.0	None	Sce_HS-up_2.0	None	None	None	None	None	None	None	None	None	None	None	None	None	None	None	None	None	None	None	None	None	None	None	None	None	None	None	None	None
177.m03384	CNAG_03445	None	None	None	None	None	None	None	KOG2301	PT	Voltage-gated Ca2+ channels, alpha1 subunits	conserved hypothetical protein	None	None	None	None	None	None	None	None	None	None	None	None	None	None	None	None	None	None	None	None	None	None	None	None	None	None	None	None	None	None	None	None	None	None	None	None	None
177.m03402	CNAG_03353	YBR146W	MRPS9	SPAC29A4.03c	None	orf19.5230	ca1109	MRPS9	KOG1697	J	Mitochondrial/chloroplast ribosomal protein S9	conserved hypothetical protein	Mitochondrial ribosomal protein of the small subunit	mitochondrial ribosomal protein subunit S9	ribosomal protein S9 small subunit precursor	None	None	None	None	None	None	None	None	None	None	None	None	None	None	None	None	None	None	None	None	None	None	None	None	None	None	None	None	None	None	None	None	None	None
177.m03452	CNAG_07720	YKR065C	PAM17	SPAC167.04	pam17	orf19.240	ca1265	IPF10510	None	None	None	presequence translocated-associated motor subunit PAM17	Presequence translocase-associated motor subunit, required for stable complex formation between cochaperones Pam16p and Pam18p, promotes association of Pam16p-Pam18p with the presequence translocase	TIM23 translocase complex-associated motor subunit Pam17 (predicted)	unknown function	None	None	None	None	None	None	None	None	None	None	None	None	None	None	None	None	None	None	None	None	None	None	None	None	None	None	None	None	None	None	None	None	None	None
177.m03471	CNAG_03315	YPR165W	RHO1	SPAC1F7.04	rho1	orf19.2843	ca2866	RHO1	KOG0393	R	Ras-related small GTPase, Rho type	Rho1 GTP-binding protein	GTP-binding protein of the rho subfamily of Ras-like proteins, involved in establishment of cell polarity; regulates protein kinase C (Pkc1p) and the cell wall synthesizing enzyme 1,3-beta-glucan synthase (Fks1p and Gsc2p)	Rho family GTPase Rho1	GTP-binding protein of the rho subfamily of ras-like proteins (by homology)	None	None	None	None	None	None	None	None	None	None	None	None	None	None	None	None	None	None	None	Cal_XS-dw	None	None	None	Cal_SSR.XS-dw	None	None	None	None	None	Cal_XS-dw_1.5	None	None	None	None
177.m03476	CNAG_03347	YDR258C	HSP78	SPBC4F6.17c	None	None	None	None	KOG1051	O	Chaperone HSP104 and related ATP-dependent Clp proteases	chaperone	Oligomeric mitochondrial matrix chaperone that cooperates with Ssc1p in mitochondrial thermotolerance after heat shock; prevents the aggregation of misfolded matrix proteins; component of the mitochondrial proteolysis system	mitochondrial heatshock protein Hsp78 (predicted)	None	Sce_OS-up_2.0	None	None	None	Sce_HS-up_2.0	None	None	None	None	None	None	Spo_XS-dw_2.0	Spo_Cd-up_2.0	None	None	None	None	None	None	None	None	None	None	None	None	None	None	None	None	None	None	None	None	None
179.m00002	CNAG_00012	None	None	None	None	orf19.2036	ca3645	IPF4127	KOG2741	GQ	Dimeric dihydrodiol dehydrogenase	conserved hypothetical protein	None	None	putative dimeric dihydrodiol dehydrogenase (by homology)	None	None	None	None	None	None	None	None	None	None	None	None	None	None	None	None	None	None	None	None	None	None	None	None	None	None	None	None	None	None	None	None	None	None
179.m00004	CNAG_06983	None	None	None	None	None	None	None	KOG1865	O	Ubiquitin carboxyl-terminal hydrolase	conserved hypothetical protein	None	None	None	None	None	None	None	None	None	None	None	None	None	None	None	None	None	None	None	None	None	None	None	None	None	None	None	None	None	None	None	None	None	None	None	None	None
179.m00006	CNAG_06963	None	None	None	None	None	None	None	KOG0254	R	Predicted transporter (major facilitator superfamily)	sugar transporter	None	None	None	None	None	None	None	None	None	None	None	None	None	None	None	None	None	None	None	None	None	None	None	None	None	None	None	None	None	None	None	None	None	None	None	None	None
179.m00015	CNAG_03078	YCR026C	NPP1	SPBC725.05c	None	orf19.4409	ca1455	IPF15081	KOG2645	R	Type I phosphodiesterase/nucleotide pyrophosphatase	type I phosphodiesterase/nucleotide pyrophosphatase family protein	Nucleotide pyrophosphatase/phosphodiesterase family member; mediates extracellular nucleotide phosphate hydrolysis along with Npp2p and Pho5p; activity and expression enhanced during conditions of phosphate starvation	nucleotide pyrophosphatase (predicted)	phophodiesterase (by homology)	None	None	None	None	None	None	None	None	None	None	None	None	None	None	None	None	None	None	None	None	None	None	None	None	None	None	None	None	None	None	None	None	None	None
179.m00038	CNAG_03049	YDR510W	SMT3	SPBC365.06	pmt3	orf19.670	ca4105	SMT3	KOG1769	O	Ubiquitin-like proteins	predicted protein	Ubiquitin-like protein of the SUMO family, conjugated to lysine residues of target proteins; regulates chromatid cohesion, chromosome segregation, APC-mediated proteolysis, DNA replication and septin ring dynamics	SUMO	Ubiquitin-like protein (by homology)	None	None	None	None	None	None	None	None	None	None	None	None	None	None	None	None	None	None	None	None	None	None	None	None	None	None	None	None	None	None	None	None	None	None
179.m00059	CNAG_03022	None	None	SPCC777.05	gtr2	None	None	None	KOG3887	U	Predicted small GTPase involved in nuclear protein import	conserved hypothetical protein	None	Gtr1/RagA G protein Gtr2	None	None	None	None	None	None	None	None	None	None	None	None	None	None	None	None	None	None	None	None	None	None	None	None	None	None	None	None	None	None	None	None	None	None	None
179.m00068	CNAG_03012	None	None	None	None	None	None	None	None	None	None	hypothetical protein	None	None	None	None	None	None	None	None	None	None	None	None	None	None	None	None	None	None	None	None	None	None	None	None	None	None	None	None	None	None	None	None	None	None	None	None	None
179.m00069	CNAG_03012	None	None	None	None	None	None	None	None	None	None	hypothetical protein	None	None	None	None	None	None	None	None	None	None	None	None	None	None	None	None	None	None	None	None	None	None	None	None	None	None	None	None	None	None	None	None	None	None	None	None	None
179.m00070	CNAG_03012	None	None	None	None	None	None	None	None	None	None	hypothetical protein	None	None	None	None	None	None	None	None	None	None	None	None	None	None	None	None	None	None	None	None	None	None	None	None	None	None	None	None	None	None	None	None	None	None	None	None	None
179.m00093	CNAG_01583	YLR025W	SNF7	SPAC1142.07c	vps32	orf19.6040	ca4903	SNF7	KOG1656	U	Protein involved in glucose derepression and pre-vacuolar endosome protein sorting	vacuolar-sorting protein SNF7	One of four subunits of the endosomal sorting complex required for transport III (ESCRT-III); involved in the sorting of transmembrane proteins into the multivesicular body (MVB) pathway; recruited from the cytoplasm to endosomal membranes	vacuolar sorting protein Vps32	Class E Vps protein (by homology)	None	None	None	None	None	None	None	None	None	None	None	None	None	None	None	None	None	None	None	None	None	None	None	None	None	None	None	None	None	None	None	None	None	None
179.m00098	CNAG_01588	YDR276C	PMP3	SPBC713.11c	pmp3	orf19.2959.1	ca4174	IPF4430	KOG1773	R	Stress responsive protein	hypothetical protein	Small plasma membrane protein related to a family of plant polypeptides that are overexpressed under high salt concentration or low temperature, not essential for viability, deletion causes hyperpolarization of the plasma membrane potential	plasma membrane proteolipid Pmp3	unknown function	None	None	None	None	None	None	None	None	Spo_OS-up_2.0	None	Spo_XS-up_2.0	None	None	None	None	None	None	None	None	None	None	None	None	None	Cal_OS-up_1.5	None	None	None	None	None	None	None	None	None
179.m00102	CNAG_01594	YMR189W	GCV2	SPAC13G6.06c	gcv2	orf19.385	ca3883	GCV2	KOG2040	E	Glycine dehydrogenase (decarboxylating)	glycine dehydrogenase	P subunit of the mitochondrial glycine decarboxylase complex, required for the catabolism of glycine to 5,10-methylene-THF; expression is regulated by levels of 5,10-methylene-THF in the cytoplasm	glycine cleavage complex subunit P (predicted)	Glycine decarboxylase P subunit	None	None	Sce_XS-up_2.0	None	Sce_HS-up_2.0	None	None	None	None	None	None	None	None	None	None	None	None	None	None	None	None	None	None	None	None	Cal_OS-dw_1.5	None	Cal_OS-dw_2.0	None	Cal_XS-dw_1.5	None	Cal_XS-dw_2.0	None	None
179.m00123	CNAG_01621	None	None	None	None	None	None	None	None	None	None	conserved hypothetical protein	None	None	None	None	None	None	None	None	None	None	None	None	None	None	None	None	None	None	None	None	None	None	None	None	None	None	None	None	None	None	None	None	None	None	None	None	None
179.m00131	CNAG_01630	YNL317W	PFS2	SPAC12G12.14c	pfs2	orf19.2307	ca3310	PFS2	KOG0284	A	Polyadenylation factor I complex, subunit PFS2	polyadenylation factor subunit 2	Integral subunit of the pre-mRNA cleavage and polyadenylation factor (CPF) complex; plays an essential role in mRNA 3'-end formation by bridging different processing factors and thereby promoting the assembly of the processing complex	WD repeat protein Pfs2	Polyadenylation Factor I subunit (by homology)	None	None	None	None	None	None	None	None	None	None	None	None	None	None	None	None	None	None	None	None	None	None	None	None	None	None	None	None	Cal_XS-up_1.5	None	None	None	None	None
179.m00142	CNAG_01642	YCR092C	MSH3	SPAC8F11.03	msh3	orf19.3608	ca1127	MSH3	KOG0218	L	Mismatch repair MSH3	DNA mismatch repair protein Msh3	Mismatch repair protein, forms dimers with Msh2p that mediate repair of insertion or deletion mutations and removal of nonhomologous DNA ends, contains a PCNA (Pol30p) binding motif required for genome stability	MutS protein homolog 3	DNA mismatch repair by homology	None	None	None	None	None	None	None	None	None	None	None	None	None	None	None	None	None	None	None	None	None	None	None	None	None	None	None	None	None	Cal_XS-dw_1.5	None	None	None	None
179.m00158	CNAG_07595	None	None	None	None	None	None	None	KOG0516	Z	Dystonin, GAS (Growth-arrest-specific protein), and related proteins	conserved hypothetical protein	None	None	None	None	None	None	None	None	None	None	None	None	None	None	None	None	None	None	None	None	None	None	None	None	None	None	None	None	None	None	None	None	None	None	None	None	None
179.m00160	CNAG_01664	YBR160W	CDC28	SPBC11B10.09	cdc2	orf19.3856	ca3095	CDC28	KOG0594	R	Protein kinase PCTAIRE and related kinases	CMGC/CDK/CDC2 protein kinase	Catalytic subunit of the main cell cycle cyclin-dependent kinase (CDK); alternately associates with G1 cyclins (CLNs) and G2/M cyclins (CLBs) which direct the CDK to specific substrates	cyclin-dependent protein kinase Cdc2	CELL DIVISION CONTROL PROTEIN 28 -protein kinase	Sce_OS-up_2.0	None	None	Sce_XS-dw_2.0	None	None	None	None	None	None	None	None	None	None	None	None	None	None	None	None	None	None	None	None	None	None	None	None	None	None	None	None	None	None
179.m00169	CNAG_01674	None	None	None	None	None	None	None	KOG2533	G	Permease of the major facilitator superfamily	MFS transporter	None	None	None	None	None	None	None	None	None	None	None	None	None	None	None	None	None	None	None	None	None	None	None	None	None	None	None	None	None	None	None	None	None	None	None	None	None
179.m00220	CNAG_01735	None	None	None	None	None	None	None	KOG0053	E	Cystathionine beta-lyases/cystathionine gamma-synthases	conserved hypothetical protein	None	None	None	None	None	None	None	None	None	None	None	None	None	None	None	None	None	None	None	None	None	None	None	None	None	None	None	None	None	None	None	None	None	None	None	None	None
179.m00228	CNAG_01745	None	None	None	None	None	None	None	KOG2711	C	Glycerol-3-phosphate dehydrogenase/dihydroxyacetone 3-phosphate reductase	sn-glycerol-3-phosphate dehydrogenase NAD	None	None	None	None	None	None	None	None	None	None	None	None	None	None	None	None	None	None	None	None	None	None	None	None	None	None	None	None	None	None	None	None	None	None	None	None	None
179.m00233	CNAG_01752	YOR222W	ODC2	SPAC328.09	None	orf19.3518	ca0807	IPF12564	KOG0754	C	Mitochondrial oxodicarboxylate carrier protein	organic acid transporter	Mitochondrial inner membrane transporter, exports 2-oxoadipate and 2-oxoglutarate from the mitochondrial matrix to the cytosol for use in lysine and glutamate biosynthesis and in lysine catabolism	2-oxoadipate and 2-oxoglutarate transporter (predicted)	ADP/ATP carrier proteins (by homology)	None	None	None	None	None	Sce_HS-dw_2.0	None	None	None	None	Spo_XS-up_2.0	None	None	None	None	None	None	None	None	None	None	None	None	None	None	None	None	None	None	None	None	None	None	None
179.m00262	CNAG_01796	None	None	None	None	None	None	None	KOG2210	T	Oxysterol-binding protein	conserved hypothetical protein	None	None	None	None	None	None	None	None	None	None	None	None	None	None	None	None	None	None	None	None	None	None	None	None	None	None	None	None	None	None	None	None	None	None	None	None	None
179.m00273	CNAG_01817	YDR292C	SRP101	SPBC3B9.03	None	orf19.3952	ca1011	SRP101	KOG0781	U	Signal recognition particle receptor, alpha subunit	signal recognition particle binding protein	Signal recognition particle (SRP) receptor - alpha subunit; contain GTPase domains; involved in SRP-dependent protein targeting; interacts with SRP102p	signal recognition particle receptor alpha subunit Srp101	signal recognition particle receptor, alpha chain (by homology)	None	None	None	None	None	None	None	None	None	None	None	None	None	None	None	None	None	None	None	None	None	None	None	None	None	None	None	None	None	None	None	None	None	None
179.m00275	CNAG_01819	YDR116C	MRPL1	SPAC1610.02c	None	orf19.5698	ca2613	IPF5446	None	None	None	ribosomal protein L1	Mitochondrial ribosomal protein of the large subunit	mitochondrial ribosomal protein subunit L1	putative ribosomal protein (by homology)	None	None	None	None	None	None	None	None	None	None	None	None	None	None	None	None	None	None	None	None	None	None	None	None	None	None	None	None	None	None	None	None	None	None
179.m00295	CNAG_01850	None	None	SPAC27E2.09	mak2	orf19.5181	ca0108	HIK1	KOG0519	T	Sensory transduction histidine kinase	protein-histidine kinase	None	histidine kinase Mak2	histidine kinase	None	None	None	None	None	None	None	None	None	None	None	None	None	None	None	None	None	None	None	None	None	None	None	None	None	None	None	None	None	None	None	None	None	None
179.m00298	CNAG_01854	None	None	None	None	None	None	None	KOG3544	W	Collagens (type IV and type XIII), and related proteins	heparinase II/III family protein	None	None	None	None	None	None	None	None	None	None	None	None	None	None	None	None	None	None	None	None	None	None	None	None	None	None	None	None	None	None	None	None	None	None	None	None	None
179.m00302	CNAG_02714	YAL003W	EFB1	SPCC1450.04	tef5	orf19.3838	ca4862	EFB1	KOG1668	K	Elongation factor 1 beta/delta chain	elongation factor 1-beta	Translation elongation factor 1 beta; stimulates nucleotide exchange to regenerate EF-1 alpha-GTP for the next elongation cycle; part of the EF-1 complex, which facilitates binding of aminoacyl-tRNA to the ribosomal A site	translation elongation factor EF-1 beta subunit (eEF1B)	translation elongation factor eEF1beta	None	Sce_OS-dw_2.0	None	Sce_XS-dw_2.0	None	None	None	None	None	None	None	Spo_XS-dw_2.0	None	Spo_Cd-dw_2.0	None	Spo_CESR-dw	None	None	None	Cal_XS-dw	None	None	None	Cal_SSR.XS-dw	None	None	None	None	None	None	None	None	None	None
179.m00319	CNAG_02741	YKL134C	^OCT1	SPAC1F3.10c	40087	orf19.1195	ca1374	MIP1	KOG2090	O	Metalloendopeptidase family - mitochondrial intermediate peptidase	mitochondrial intermediate peptidase	Mitochondrial intermediate peptidase, cleaves N-terminal residues of a subset of proteins upon import, after their cleavage by mitochondrial processing peptidase (Mas1p-Mas2p); may contribute to mitochondrial iron homeostasis	mitochondrial intermediate peptidase Oct1 (predicted)	Mitochondrial intermediate peptidase (by homology)	Sce_OS-up_2.0	None	None	None	None	None	None	None	None	None	None	None	None	None	None	None	None	None	None	None	None	None	None	None	None	None	None	None	None	None	None	None	None	None
179.m00327	CNAG_02751	None	None	None	None	None	None	None	KOG0725	R	Reductases with broad range of substrate specificities	short-chain dehydrogenase	None	None	None	None	None	None	None	None	None	None	None	None	None	None	None	None	None	None	None	None	None	None	None	None	None	None	None	None	None	None	None	None	None	None	None	None	None
179.m00342	CNAG_02769	None	None	None	None	None	None	None	KOG1239	OU	Inner membrane protein translocase involved in respiratory chain assembly	conserved hypothetical protein	None	None	None	None	None	None	None	None	None	None	None	None	None	None	None	None	None	None	None	None	None	None	None	None	None	None	None	None	None	None	None	None	None	None	None	None	None
179.m00352	CNAG_02788	None	None	None	None	None	None	None	None	None	None	conserved hypothetical protein	None	None	None	None	None	None	None	None	None	None	None	None	None	None	None	None	None	None	None	None	None	None	None	None	None	None	None	None	None	None	None	None	None	None	None	None	None
179.m00374	CNAG_02817	None	None	SPAC9E9.07c	ypt2	orf19.2571	ca2681	SEC4	KOG0078	TU	GTP-binding protein SEC4, small G protein superfamily, and related Ras family GTP-binding proteins	rab/GTPase	None	GTPase Ypt2	GTP-binding protein	None	None	None	None	None	None	None	None	None	None	None	None	None	None	None	None	None	None	None	None	None	None	None	None	None	None	None	None	None	None	None	None	None	None
179.m00392	CNAG_02842	YNL252C	MRPL17	SPCC126.05c	mrpl17	orf19.585	ca3432	MRPL17	KOG4548	J	Mitochondrial ribosomal protein L17	conserved hypothetical protein	Mitochondrial ribosomal protein of the large subunit	mitochondrial ribosomal protein subunit L17	ribosomal protein of the large subunit (YmL30), mitochondrial (by homology)	None	None	Sce_XS-up_2.0	None	None	None	None	None	None	None	None	None	None	None	None	None	None	None	None	None	None	None	None	None	None	None	None	None	None	None	None	None	None	None
179.m00394	CNAG_02844	YCL004W	PGS1	SPBP18G5.02	None	orf19.7072	ca5625	PEL1	KOG3964	I	Phosphatidylglycerolphosphate synthase	CDP-diacylglycerol-glycerol-3-phosphate 3-phosphatidyltransferase	Phosphatidylglycerolphosphate synthase, catalyzes the synthesis of phosphatidylglycerolphosphate from CDP-diacylglycerol and sn-glycerol 3-phosphate in the first committed and rate-limiting step of cardiolipin biosynthesis	CDP-diacylglycerol-glycerol-3-phosphate3-phosphatidyltransferase	CDP-diacylglycerol-serine-O-phosphatidyltransfer ase (by homology)	None	None	None	None	None	None	None	None	None	None	None	None	None	None	None	None	None	None	None	None	None	None	None	None	None	None	None	None	None	Cal_XS-dw_1.5	None	None	None	None
179.m00408	CNAG_02860	None	None	SPBC21B10.07	None	None	None	None	None	None	None	endo-1,3(4)-beta-glucanase	None	glycosyl hydrolase family 16	None	None	None	None	None	None	None	None	None	None	None	None	None	None	None	None	None	None	None	None	None	None	None	None	None	None	None	None	None	None	None	None	None	None	None
179.m00435	CNAG_02896	None	None	None	None	None	None	None	KOG1393	I	Hydroxymethylglutaryl-CoA synthase	hydroxymethylglutaryl-CoA synthase	None	None	None	None	None	None	None	None	None	None	None	None	None	None	None	None	None	None	None	None	None	None	None	None	None	None	None	None	None	None	None	None	None	None	None	None	None
179.m00453	CNAG_02916	YDR377W	ATP17	SPBC1604.11	atp17	orf19.7509.1	ca5852	ATP17	None	None	None	hydrogen-transporting ATP synthase	Subunit f of the F0 sector of mitochondrial F1F0 ATP synthase, which is a large, evolutionarily conserved enzyme complex required for ATP synthesis	F0-ATPase subunit F	F1F0-ATPase complex, F1 delta subunit f (by homology)	None	None	None	None	None	None	None	None	None	None	None	None	None	None	None	None	None	None	None	None	None	None	None	None	None	None	None	None	None	None	None	None	None	None
179.m00457	CNAG_02921	None	None	None	None	None	None	None	KOG1012	R	Ca2+-dependent lipid-binding protein CLB1/vesicle protein vp115/Granuphilin A, contains C2 domain	conserved hypothetical protein	None	None	None	None	None	None	None	None	None	None	None	None	None	None	None	None	None	None	None	None	None	None	None	None	None	None	None	None	None	None	None	None	None	None	None	None	None
179.m00481	CNAG_02943	YIL105C	SLM1	SPAC637.13c	None	orf19.3505	ca2455	IPF12228	None	None	None	cytoplasmic protein	Phosphoinositide PI4,5P(2) binding protein, forms a complex with Slm2p; acts downstream of Mss4p in a pathway regulating actin cytoskeleton organization in response to stress; subunit of and phosphorylated by the TORC2 complex	cytoskeletal signaling protein	unknown function	None	None	None	None	Sce_HS-up_2.0	None	None	None	None	None	Spo_XS-up_2.0	None	Spo_Cd-up_2.0	None	None	None	None	None	None	None	None	None	None	None	None	None	None	None	None	None	None	None	None	None
179.m00483	CNAG_02943	YIL105C	SLM1	SPAC637.13c	None	orf19.3505	ca2455	IPF12228	None	None	None	cytoplasmic protein	Phosphoinositide PI4,5P(2) binding protein, forms a complex with Slm2p; acts downstream of Mss4p in a pathway regulating actin cytoskeleton organization in response to stress; subunit of and phosphorylated by the TORC2 complex	cytoskeletal signaling protein	unknown function	None	None	None	None	Sce_HS-up_2.0	None	None	None	None	None	Spo_XS-up_2.0	None	Spo_Cd-up_2.0	None	None	None	None	None	None	None	None	None	None	None	None	None	None	None	None	None	None	None	None	None
179.m00495	CNAG_02956	YPR133C	SPN1	SPBC19G7.16	iws1	orf19.6252	ca0566	IPF13522	KOG1793	S	Uncharacterized conserved protein	transcription factor IWS1	Protein that interacts with Spt6p and copurifies with Spt5p and RNA polymerase II, probable transcriptional elongation factor; metazoan homologs contain an acidic N terminus; mutations in the gene confer an Spt- phenotype	transcription elongation factor complex subunit Iws1 (predicted)	unknown function	None	None	None	Sce_XS-dw_2.0	None	None	None	None	None	None	None	None	None	None	None	None	None	None	None	None	None	None	None	None	None	None	None	None	None	None	None	None	None	None
179.m00499	CNAG_02958	None	None	None	None	orf19.4213	ca2922	FET31	KOG1263	Q	Multicopper oxidases	ferroxidase	None	None	cell surface ferroxidase (by homology)	None	None	None	None	None	None	None	None	None	None	None	None	None	None	None	None	None	None	None	None	None	None	None	None	None	None	None	None	None	None	None	None	None	None
179.m00510	CNAG_02976	YDR236C	FMN1	SPCC18.16c	fmn1	orf19.4373	ca2584	IPF9440	KOG3110	H	Riboflavin kinase	riboflavin kinase	Riboflavin kinase, phosphorylates riboflavin to form riboflavin monophosphate (FMN), which is a necessary cofactor for many enzymes; localizes to microsomes and to the mitochondrial inner membrane	riboflavin kinase Fmn1	similar to Saccharomyces cerevisiae Fmn1p riboflavin kinase (by homology)	None	None	None	None	None	None	None	None	None	None	None	None	None	None	None	None	None	None	Cal_XS-up	None	None	None	Cal_SSR.XS-up	None	None	None	None	None	None	None	None	None	None	None
179.m00515	CNAG_02983	None	None	None	None	None	None	None	KOG3595	Z	Dyneins, heavy chain	conserved hypothetical protein	None	None	None	None	None	None	None	None	None	None	None	None	None	None	None	None	None	None	None	None	None	None	None	None	None	None	None	None	None	None	None	None	None	None	None	None	None
179.m00520	CNAG_02990	YOR052C	None	SPBC1271.05c	None	orf19.5813	ca4164	IPF9302	None	None	None	nuclear protein	None	zinc finger protein zf-AN1 type	unknown function	Sce_OS-up_2.0	None	Sce_XS-up_2.0	None	Sce_HS-up_2.0	None	Sce_CSR-up_2.0	None	None	None	Spo_XS-up_2.0	None	None	None	None	None	None	None	None	None	Cal_HS-up	None	Cal_SSR.HS-up	None	None	None	None	None	Cal_XS-up_1.5	None	None	None	None	None
179.m00548	CNAG_01548	YDR021W	FAL1	SPAC1F5.10	None	orf19.2488	ca3808	FAL1	KOG0328	J	Predicted ATP-dependent RNA helicase FAL1, involved in rRNA maturation, DEAD-box superfamily	DEAD box polypeptide 48	Nucleolar protein required for maturation of 18S rRNA, member of the eIF4A subfamily of DEAD-box ATP-dependent RNA helicases	ATP-dependent RNA helicase, eIF4A related (predicted)	ATP-dependent RNA helicase	None	Sce_OS-dw_2.0	None	Sce_XS-dw_2.0	None	Sce_HS-dw_2.0	None	Sce_CSR-dw_2.0	None	None	None	None	None	None	None	None	None	None	None	None	None	None	None	None	None	None	None	None	None	Cal_XS-dw_1.5	None	None	None	None
179.m00555	CNAG_01539	YJL153C	INO1	None	None	orf19.7585	ca5986	INO1	KOG0693	I	Myo-inositol-1-phosphate synthase	inositol-3-phosphate synthase	Inositol 1-phosphate synthase, involved in synthesis of inositol phosphates and inositol-containing phospholipids; transcription is coregulated with other phospholipid biosynthetic genes by Ino2p and Ino4p, which bind the UASINO DNA element	None	myo-inositol-1-phosphate synthase	None	None	Sce_XS-up_2.0	Sce_XS-dw_2.0	Sce_HS-up_2.0	None	None	None	None	None	None	None	None	None	None	None	None	None	Cal_XS-up	None	None	None	Cal_SSR.XS-up	None	None	None	None	None	None	None	None	None	None	None
179.m00560	CNAG_01532	YOR109W	INP53	SPBC2G2.02	syj1	orf19.7052	ca5642	INP52	KOG0566	U	Inositol-1,4,5-triphosphate 5-phosphatase (synaptojanin), INP51/INP52/INP53 family	phosphatidylinositol phosphate phosphatase	Polyphosphatidylinositol phosphatase, dephosphorylates multiple phosphatidylinositols; involved in trans Golgi network-to-early endosome pathway; hyperosmotic stress causes translocation to actin patches; contains Sac1 and 5-ptase domains	inositol-polyphosphate 5-phosphatase (synaptojanin homolog 1)	phosphatidylinositol phosphate phosphatase (by homology)	None	None	None	None	None	None	None	None	None	None	None	None	None	None	None	None	None	None	None	None	None	None	None	None	None	None	None	None	None	None	None	None	None	None
179.m00571	CNAG_01520	None	None	None	None	None	None	None	None	None	None	protein-arginine N-methyltransferase	None	None	None	None	None	None	None	None	None	None	None	None	None	None	None	None	None	None	None	None	None	None	None	None	None	None	None	None	None	None	None	None	None	None	None	None	None
179.m00584	CNAG_01501	YER163C	None	SPBC31F10.03	None	orf19.372	ca0880	IPF19542.3f	KOG3182	P	Predicted cation transporter	conserved hypothetical protein	None	ChaC-like protein	unknown function, 3-prime end	None	None	Sce_XS-up_2.0	None	Sce_HS-up_2.0	None	None	None	None	None	None	None	None	None	None	None	None	None	None	None	None	None	None	None	None	None	None	None	None	None	None	None	None	None
179.m00606	CNAG_01467	YML018C	None	SPBC405.03c	None	orf19.7427	ca5722	IPF2446	KOG2765	S	Predicted membrane protein	vacuolar membrane protein	None	membrane transporter (predicted)	unknown function	None	None	None	Sce_XS-dw_2.0	None	Sce_HS-dw_2.0	None	None	None	None	None	None	None	None	None	None	None	None	None	Cal_XS-dw	None	Cal_HS-dw	None	None	None	None	None	None	None	Cal_XS-dw_1.5	None	None	None	None
179.m00621	CNAG_01472	YPR003C	None	SPCC320.05	None	orf19.2149	ca3189	IPF11607	KOG0236	P	Sulfate/bicarbonate/oxalate exchanger SAT-1 and related transporters (SLC26 family)	endoplasmic reticulum protein	None	sulphate transporter (predicted)	unknown function	None	None	None	None	Sce_HS-up_2.0	None	None	None	None	None	Spo_XS-up_2.0	None	Spo_Cd-up_2.0	None	None	None	None	None	None	None	None	None	None	None	None	None	None	None	None	None	None	None	None	None
179.m00623	CNAG_01475	None	None	None	None	orf19.4831	ca4749	IPF4481	None	None	None	sphingolipid C9-methyltransferase	None	None	unknown function	None	None	None	None	None	None	None	None	None	None	None	None	None	None	None	None	None	None	None	None	None	None	None	None	None	None	None	None	None	Cal_XS-dw_1.5	None	None	None	None
179.m00627	CNAG_01485	YDL174C	DLD1	None	None	orf19.6043	ca4905	DLD1	KOG1231	C	Proteins containing the FAD binding domain	D-lactate dehydrogenase cytochrome oxidoreductase protein	D-lactate dehydrogenase, oxidizes D-lactate to pyruvate, transcription is heme-dependent, repressed by glucose, and derepressed in ethanol or lactate; located in the mitochondrial inner membrane	None	D-lactate ferricytochrome C oxidoreductase (by homology)	None	None	None	None	Sce_HS-up_2.0	None	None	None	None	None	None	None	None	None	None	None	None	None	None	None	None	None	None	None	None	None	None	None	None	None	None	None	None	None
179.m00630	CNAG_01481	None	None	None	None	None	None	None	KOG1824	R	TATA-binding protein-interacting protein	conserved hypothetical protein	None	None	None	None	None	None	None	None	None	None	None	None	None	None	None	None	None	None	None	None	None	None	None	None	None	None	None	None	None	None	None	None	None	None	None	None	None
179.m00652	None	None	None	None	None	None	None	None	None	None	None	None	None	None	None	None	None	None	None	None	None	None	None	None	None	None	None	None	None	None	None	None	None	None	None	None	None	None	None	None	None	None	None	None	None	None	None	None	None
179.m00658	CNAG_01632	YDR058C	TGL2	None	None	orf19.3043	ca5070	IPF3594	None	None	None	triacylglycerol lipase	Protein with lipolytic activity towards triacylglycerols and diacylglycerols when expressed in E. coli; role in yeast lipid degradation is unclear	None	triglyceride lipase (by homology)	Sce_OS-up_2.0	None	Sce_XS-up_2.0	None	Sce_HS-up_2.0	None	Sce_CSR-up_2.0	None	None	None	None	None	None	None	None	None	None	None	None	None	None	None	None	None	None	None	None	None	None	None	None	None	None	None
179.m00663	CNAG_01729	YMR128W	ECM16	SPAPB1A10.06c	None	orf19.2090	ca4811	ECM16	KOG0926	AJ	DEAH-box RNA helicase	DEAH box polypeptide 37	Essential DEAH-box ATP-dependent RNA helicase specific to the U3 snoRNP, predominantly nucleolar in distribution, required for 18S rRNA synthesis	ATP-dependent RNA helicase Dhr1 (predicted)	RNA helicase (by homology)	None	None	None	Sce_XS-dw_2.0	None	Sce_HS-dw_2.0	None	None	None	None	None	None	None	None	None	None	None	None	None	None	None	Cal_HS-dw	None	Cal_SSR.HS-dw	None	None	None	None	None	Cal_XS-dw_1.5	None	None	None	None
179.m00667	CNAG_01779	None	None	None	None	None	None	None	KOG0516	Z	Dystonin, GAS (Growth-arrest-specific protein), and related proteins	conserved hypothetical protein	None	None	None	None	None	None	None	None	None	None	None	None	None	None	None	None	None	None	None	None	None	None	None	None	None	None	None	None	None	None	None	None	None	None	None	None	None
179.m00668	CNAG_01760	None	None	None	None	None	None	None	KOG1980	S	Uncharacterized conserved protein	conserved hypothetical protein	None	None	None	None	None	None	None	None	None	None	None	None	None	None	None	None	None	None	None	None	None	None	None	None	None	None	None	None	None	None	None	None	None	None	None	None	None
179.m00679	CNAG_01797	YDR175C	RSM24	None	None	None	None	None	KOG3933	J	Mitochondrial ribosomal protein S28	conserved hypothetical protein	Mitochondrial ribosomal protein of the small subunit	None	None	None	None	None	None	None	None	None	None	None	None	None	None	None	None	None	None	None	None	None	None	None	None	None	None	None	None	None	None	None	None	None	None	None	None
179.m00692	CNAG_02795	YDR408C	ADE8	SPCC569.08c	ade5	orf19.5789	ca4147	ADE8	KOG3076	G	5'-phosphoribosylglycinamide formyltransferase	phosphoribosylglycinamide formyltransferase	Phosphoribosyl-glycinamide transformylase, catalyzes a step in the 'de novo' purine nucleotide biosynthetic pathway	phosphoribosylglycinamide formyltransferase	Phosphoribosylglycinamide formyltransferase (GART)	None	None	None	Sce_XS-dw_2.0	Sce_HS-up_2.0	Sce_HS-dw_2.0	None	None	None	None	None	None	None	Spo_Cd-dw_2.0	None	None	None	None	None	None	None	None	None	None	None	None	None	None	None	None	None	None	None	None
179.m00709	CNAG_02855	None	None	SPCC553.06	None	None	None	None	KOG2447	O	Oligosaccharyltransferase, delta subunit (ribophorin II)	conserved hypothetical protein	None	oligosaccharyltransferase subunit	None	None	None	None	None	None	None	None	None	None	None	None	None	None	None	None	None	None	None	None	None	None	None	None	None	None	None	None	None	None	None	None	None	None	None
179.m00715	CNAG_02857	YFR022W	ROG3	SPAC31A2.12	None	orf19.1509	ca2177	ROD1	KOG3780	R	Thioredoxin binding protein TBP-2/VDUP1	conserved hypothetical protein	Protein that binds to Rsp5p, which is a hect-type ubiquitin ligase, via its 2 PY motifs; has similarity to Rod1p; mutation suppresses the temperature sensitivity of an mck1 rim11 double mutant	arrestin/PY protein 1	O-dinitrobenzene,calcium and zinc resistance protein (by homology)	None	None	None	Sce_XS-dw_2.0	None	None	None	None	Spo_OS-up_2.0	None	Spo_XS-up_2.0	None	Spo_Cd-up_2.0	None	Spo_CESR-up	None	None	None	None	None	None	None	None	None	None	None	None	None	None	None	None	None	None	None
179.m05154	CNAG_02716	None	None	None	None	None	None	None	KOG4682	R	Uncharacterized conserved protein, contains BTB/POZ domain	conserved hypothetical protein	None	None	None	None	None	None	None	None	None	None	None	None	None	None	None	None	None	None	None	None	None	None	None	None	None	None	None	None	None	None	None	None	None	None	None	None	None
179.m05170	CNAG_01506	None	None	None	None	None	None	None	KOG0160	Z	Myosin class V heavy chain	conserved hypothetical protein	None	None	None	None	None	None	None	None	None	None	None	None	None	None	None	None	None	None	None	None	None	None	None	None	None	None	None	None	None	None	None	None	None	None	None	None	None
179.m05174	CNAG_01466	None	None	None	None	None	None	None	KOG4197	R	FOG: PPR repeat	conserved hypothetical protein	None	None	None	None	None	None	None	None	None	None	None	None	None	None	None	None	None	None	None	None	None	None	None	None	None	None	None	None	None	None	None	None	None	None	None	None	None
180.m00003	CNAG_05979	None	None	None	None	None	None	None	KOG0069	C	Glyoxylate/hydroxypyruvate reductase (D-isomer-specific 2-hydroxy acid dehydrogenase superfamily)	phosphoglycerate dehydrogenase	None	None	None	None	None	None	None	None	None	None	None	None	None	None	None	None	None	None	None	None	None	None	None	None	None	None	None	None	None	None	None	None	None	None	None	None	None
180.m00005	CNAG_05976	YOR310C	NOP58	SPAC23G3.06	None	orf19.1199	ca1438	NOP58	KOG2572	AJ	Ribosome biogenesis protein - Nop58p/Nop5p	SnoRNA binding domain containing protein	Protein involved in pre-rRNA processing, 18S rRNA synthesis, and snoRNA synthesis; component of the small subunit processome complex, which is required for processing of pre-18S rRNA	U3 snoRNP protein Nop58 (predicted)	nucleolar protein required for pre-18S rRNA processing	None	Sce_OS-dw_2.0	None	Sce_XS-dw_2.0	None	Sce_HS-dw_2.0	None	Sce_CSR-dw_2.0	None	None	None	None	None	None	None	None	None	None	None	None	None	None	None	None	None	Cal_OS-dw_1.5	None	Cal_OS-dw_2.0	None	None	None	None	None	None
180.m00014	CNAG_07699	None	None	None	None	None	None	None	None	None	None	zinc finger family protein	None	None	None	None	None	None	None	None	None	None	None	None	None	None	None	None	None	None	None	None	None	None	None	None	None	None	None	None	None	None	None	None	None	None	None	None	None
180.m00017	CNAG_07695	None	None	SPAC9.10	thi9	None	None	None	KOG1289	E	Amino acid transporters	gamma-aminobutyric acid transporter	None	thiamine transporter Thi9	None	None	None	None	None	None	None	None	None	None	None	Spo_XS-up_2.0	None	None	Spo_Cd-dw_2.0	None	None	None	None	None	None	None	None	None	None	None	None	None	None	None	None	None	None	None	None
180.m00018	CNAG_07695	None	None	SPAC9.10	thi9	None	None	None	KOG1289	E	Amino acid transporters	gamma-aminobutyric acid transporter	None	thiamine transporter Thi9	None	None	None	None	None	None	None	None	None	None	None	Spo_XS-up_2.0	None	None	Spo_Cd-dw_2.0	None	None	None	None	None	None	None	None	None	None	None	None	None	None	None	None	None	None	None	None
180.m00019	CNAG_07695	None	None	SPAC9.10	thi9	None	None	None	KOG1289	E	Amino acid transporters	gamma-aminobutyric acid transporter	None	thiamine transporter Thi9	None	None	None	None	None	None	None	None	None	None	None	Spo_XS-up_2.0	None	None	Spo_Cd-dw_2.0	None	None	None	None	None	None	None	None	None	None	None	None	None	None	None	None	None	None	None	None
180.m00025	CNAG_05925	YLR314C	CDC3	SPAC4F10.11	spn1	orf19.1055	ca0844	CDC3	KOG2655	DZU	Septin family protein (P-loop GTPase)	septin ring protein	Component of the septin ring of the mother-bud neck that is required for cytokinesis; septins recruit proteins to the neck and can act as a barrier to diffusion at the membrane, and they comprise the 10nm filaments seen with EM	septin Spn1	Cell division control protein	None	None	None	None	None	None	None	None	None	None	None	None	None	None	None	None	None	None	None	None	None	None	None	None	None	None	None	None	None	None	None	None	None	None
180.m00028	CNAG_05921	YOR245C	DGA1	SPCC1235.15	dga1	orf19.6941	ca4709	IPF5895	KOG0831	I	Acyl-CoA:diacylglycerol acyltransferase (DGAT)	diacylglycerol O-acyltransferase	Diacylglycerol acyltransferase, catalyzes the terminal step of triacylglycerol (TAG) formation, acylates diacylglycerol using acyl-CoA as an acyl donor, localized to lipid particles	diacylglycerol O-acyltransferase	unknown function	Sce_OS-up_2.0	None	None	None	None	None	None	None	None	None	Spo_XS-up_2.0	None	Spo_Cd-up_2.0	None	None	None	None	None	None	None	None	None	None	None	None	None	None	None	None	None	None	None	None	None
180.m00066	CNAG_05847	YDR353W	TRR1	SPBC3F6.03	trr1	orf19.4290	ca3059	TRR1	KOG0404	O	Thioredoxin reductase	thioredoxin-disulfide reductase	Cytoplasmic thioredoxin reductase, key regulatory enzyme that determines the redox state of the thioredoxin system, which acts as a disulfide reductase system and protects cells against both oxidative and reductive stress	thioredoxin reductase Trr1	Thioredoxin reductase (by homology)	Sce_OS-up_2.0	Sce_OS-dw_2.0	Sce_XS-up_2.0	None	None	None	None	None	None	None	Spo_XS-up_2.0	None	None	None	None	None	None	None	Cal_XS-up	None	None	None	Cal_SSR.XS-up	None	None	None	None	None	Cal_XS-up_1.5	None	Cal_XS-up_2.0	None	None	None
180.m00072	None	None	None	None	None	None	None	None	None	None	None	None	None	None	None	None	None	None	None	None	None	None	None	None	None	None	None	None	None	None	None	None	None	None	None	None	None	None	None	None	None	None	None	None	None	None	None	None	None
180.m00079	CNAG_05829	YHR077C	NMD2	SPAC19A8.08	upf2	orf19.864	ca1862	NMD2	KOG2051	A	Nonsense-mediated mRNA decay 2 protein	conserved hypothetical protein	Protein involved in the nonsense-mediated mRNA decay (NMD) pathway; interacts with Nam7p and Upf3p; involved in telomere maintenance	nonsense-mediated decay protein Upf2	Nonsense-mediated mRNA decay protein 2 (by homology)	None	None	None	None	None	None	None	None	None	None	None	None	None	None	None	None	None	None	None	None	None	None	None	None	None	None	None	None	None	None	None	None	None	None
180.m00083	CNAG_05805	None	None	None	None	None	None	None	KOG4466	DK	Component of histone deacetylase complex (breast carcinoma metastasis suppressor 1 protein in human)	conserved hypothetical protein	None	None	None	None	None	None	None	None	None	None	None	None	None	None	None	None	None	None	None	None	None	None	None	None	None	None	None	None	None	None	None	None	None	None	None	None	None
180.m00099	CNAG_05759	YNR016C	ACC1	SPAC56E4.04c	cut6	orf19.7466	ca5816	ACC1	KOG0368	I	Acetyl-CoA carboxylase	acetyl-CoA carboxylase	Acetyl-CoA carboxylase, biotin containing enzyme that catalyzes the carboxylation of acetyl-CoA to form malonyl-CoA; required for de novo biosynthesis of long-chain fatty acids	acetyl-CoA carboxylase	acetyl-coenzyme-A carboxylase (by homology)	None	None	None	None	None	None	None	None	None	None	None	None	None	None	None	None	None	None	None	None	None	None	None	None	None	Cal_OS-dw_1.5	None	None	None	None	None	None	None	None
180.m00115	CNAG_05724	None	None	None	None	None	None	None	None	None	None	conserved hypothetical protein	None	None	None	None	None	None	None	None	None	None	None	None	None	None	None	None	None	None	None	None	None	None	None	None	None	None	None	None	None	None	None	None	None	None	None	None	None
180.m00127	CNAG_05683	None	None	None	None	None	None	None	KOG0244	Z	Kinesin-like protein	conserved hypothetical protein	None	None	None	None	None	None	None	None	None	None	None	None	None	None	None	None	None	None	None	None	None	None	None	None	None	None	None	None	None	None	None	None	None	None	None	None	None
180.m00143	CNAG_06696	YGL190C	CDC55	SPAC227.07c	pab1	orf19.1468	ca4535	CDC55	KOG1354	T	Serine/threonine protein phosphatase 2A, regulatory subunit	Ppp2r2b protein	Non-essential regulatory subunit B of protein phosphatase 2A, which has multiple roles in mitosis and protein biosynthesis; involved in regulation of mitotic exit; found in the nucleus of most cells, also at the bud neck and at the bud tip	protein phosphatase regulatory subunit Pab1	B subunit of protein phosphatase 2A (by homology)	None	None	None	None	None	None	None	None	None	None	None	None	None	None	None	None	None	None	None	None	None	None	None	None	None	None	None	None	None	None	None	None	None	None
180.m00165	CNAG_06668	YNR018W	AIM38	None	None	None	None	None	None	None	None	mitochondrial protein	Putative protein of unknown function; non-tagged protein is detected in purified mitochondria; null mutant displays decreased frequency of mitochondrial genome loss (petite formation) and severe growth defect in minimal glycerol media	None	None	None	None	None	None	None	None	None	None	None	None	None	None	None	None	None	None	None	None	None	None	None	None	None	None	None	None	None	None	None	None	None	None	None	None
180.m00179	CNAG_06631	None	None	None	None	None	None	None	KOG1836	W	Extracellular matrix glycoprotein Laminin subunits alpha and gamma	myosin heavy chain	None	None	None	None	None	None	None	None	None	None	None	None	None	None	None	None	None	None	None	None	None	None	None	None	None	None	None	None	None	None	None	None	None	None	None	None	None
180.m00186	CNAG_06623	None	None	None	None	orf19.3894	ca1052	IPF15861	None	None	None	myo-inositol oxygenase	None	None	unknown function	None	None	None	None	None	None	None	None	None	None	None	None	None	None	None	None	None	None	None	None	None	None	None	None	None	None	None	None	None	None	None	None	None	None
180.m00189	CNAG_06617	None	None	None	None	None	None	None	KOG4419	F	5' nucleotidase	conserved hypothetical protein	None	None	None	None	None	None	None	None	None	None	None	None	None	None	None	None	None	None	None	None	None	None	None	None	None	None	None	None	None	None	None	None	None	None	None	None	None
180.m00191	CNAG_06614	YPL206C	None	SPAC4D7.02c	None	orf19.3483	ca2896	IPF14981	KOG2258	C	Glycerophosphoryl diester phosphodiesterase	glycerophosphodiesterase	None	glycerophosphoryl diester phosphodiesterase (predicted)	unknown function	None	None	None	None	Sce_HS-up_2.0	None	None	None	Spo_OS-up_2.0	None	Spo_XS-up_2.0	None	Spo_Cd-up_2.0	None	Spo_CESR-up	None	Cal_OS-up	None	None	None	None	None	Cal_SSR.OS-up	None	Cal_OS-up_1.5	None	None	None	Cal_XS-up_1.5	None	None	None	None	None
180.m00208	CNAG_06580	None	None	None	None	None	None	None	KOG0017	R	FOG: Transposon-encoded proteins with TYA, reverse transcriptase, integrase domains in various combinations	VosA	None	None	None	None	None	None	None	None	None	None	None	None	None	None	None	None	None	None	None	None	None	None	None	None	None	None	None	None	None	None	None	None	None	None	None	None	None
180.m00210	CNAG_06578	None	None	None	None	None	None	None	KOG1778	K	CREB binding protein/P300 and related TAZ Zn-finger proteins	conserved hypothetical protein	None	None	None	None	None	None	None	None	None	None	None	None	None	None	None	None	None	None	None	None	None	None	None	None	None	None	None	None	None	None	None	None	None	None	None	None	None
180.m00211	CNAG_06577	None	None	None	None	None	None	None	None	None	None	conserved hypothetical protein	None	None	None	None	None	None	None	None	None	None	None	None	None	None	None	None	None	None	None	None	None	None	None	None	None	None	None	None	None	None	None	None	None	None	None	None	None
180.m00212	CNAG_06576	None	None	None	None	None	None	None	KOG1189	E	Global transcriptional regulator, cell division control protein	allergen	None	None	None	None	None	None	None	None	None	None	None	None	None	None	None	None	None	None	None	None	None	None	None	None	None	None	None	None	None	None	None	None	None	None	None	None	None
180.m00213	CNAG_06574	None	None	None	None	None	None	None	None	None	None	antiphagocytic protein 1	None	None	None	None	None	None	None	None	None	None	None	None	None	None	None	None	None	None	None	None	None	None	None	None	None	None	None	None	None	None	None	None	None	None	None	None	None
180.m00230	CNAG_06548	YCL045C	None	SPAC25H1.07	None	orf19.4131	ca1223	IPF14870	KOG2103	S	Uncharacterized conserved protein	endoplasmic reticulum protein	None	DUF1620 family protein	unknown function	None	None	None	None	None	None	None	None	None	None	None	None	None	None	None	None	None	None	None	None	None	None	None	None	None	None	None	None	None	Cal_XS-dw_1.5	None	None	None	None
180.m00232	None	None	None	None	None	None	None	None	None	None	None	None	None	None	None	None	None	None	None	None	None	None	None	None	None	None	None	None	None	None	None	None	None	None	None	None	None	None	None	None	None	None	None	None	None	None	None	None	None
180.m00233	CNAG_06541	None	None	None	None	orf19.278	ca2778	MTR	KOG1303	E	Amino acid transporters	conserved hypothetical protein	None	None	neutral amino acid permease-like by homology	None	None	None	None	None	None	None	None	None	None	None	None	None	None	None	None	None	None	None	None	None	None	None	None	None	None	None	None	None	None	None	None	None	None
180.m00241	CNAG_06531	None	None	None	None	None	None	None	None	None	None	conserved hypothetical protein	None	None	None	None	None	None	None	None	None	None	None	None	None	None	None	None	None	None	None	None	None	None	None	None	None	None	None	None	None	None	None	None	None	None	None	None	None
180.m00263	CNAG_05915	None	None	None	None	None	None	None	None	None	None	hypothetical protein	None	None	None	None	None	None	None	None	None	None	None	None	None	None	None	None	None	None	None	None	None	None	None	None	None	None	None	None	None	None	None	None	None	None	None	None	None
180.m00277	CNAG_05895	YDR301W	CFT1	SPBC1709.08	cft1	orf19.2760	ca0426	CFT1	KOG1896	A	mRNA cleavage and polyadenylation factor II complex, subunit CFT1 (CPSF subunit)	cleavage and polyadenylation specific protein	RNA-binding subunit of the mRNA cleavage and polyadenylation factor; involved in poly(A) site recognition and required for both pre-mRNA cleavage and polyadenylation, 51% sequence similarity with mammalian AAUAA-binding subunit of CPSF	cleavage factor one Cft1 (predicted)	pre-mRNA 3 -end processing factor CF II (by homology)	None	None	None	None	None	None	None	None	None	None	None	None	None	None	None	None	None	None	None	None	None	None	None	None	None	None	None	None	None	None	None	None	None	None
180.m00314	CNAG_05833	None	None	None	None	None	None	None	KOG2533	G	Permease of the major facilitator superfamily	allantoate transporter	None	None	None	None	None	None	None	None	None	None	None	None	None	None	None	None	None	None	None	None	None	None	None	None	None	None	None	None	None	None	None	None	None	None	None	None	None
180.m00330	CNAG_05823	None	None	None	None	None	None	None	KOG1205	Q	Predicted dehydrogenase	conserved hypothetical protein	None	None	None	None	None	None	None	None	None	None	None	None	None	None	None	None	None	None	None	None	None	None	None	None	None	None	None	None	None	None	None	None	None	None	None	None	None
180.m00336	CNAG_05799	YLR308W	CDA2	None	None	orf19.7503	ca5847	CDA2	None	None	None	chitin deacetylase	Chitin deacetylase, together with Cda1p involved in the biosynthesis ascospore wall component, chitosan; required for proper rigidity of the ascospore wall	None	chitin deacetylase (by homology)	None	None	Sce_XS-up_2.0	None	None	None	None	None	None	None	None	None	None	None	None	None	None	None	None	None	None	None	None	None	None	None	None	None	None	None	None	None	None	None
180.m00359	CNAG_05745	YBR172C	SMY2	SPAC4F10.13c	mpd2	orf19.3141	ca0741	IPF3261	KOG1862	R	GYF domain containing proteins	cytoplasmic protein	Protein of unknown function that interacts with Myo2p; has similarity to S. pombe Mpd2	GYF domain	unknown function	None	None	None	Sce_XS-dw_2.0	None	Sce_HS-dw_2.0	None	None	None	None	None	None	None	None	None	None	None	None	None	None	None	None	None	None	None	None	None	None	None	Cal_XS-dw_1.5	None	None	None	Cal_Cd-dw_1.5
180.m00363	CNAG_05761	YBR135W	CKS1	SPBC1734.14c	suc1	orf19.1282	ca2365	CKS1	KOG3484	D	Cyclin-dependent protein kinase CDC28, regulatory subunit CKS1, and related proteins	protein kinase activator	Cyclin-dependent protein kinase regulatory subunit and adaptor; modulates proteolysis of M-phase targets through interactions with the proteasome; role in transcriptional regulation, recruiting proteasomal subunits to target gene promoters	cyclin-dependent protein kinase regulatory subunit Suc1	cyclin-dependent kinases regulatory subunit (by homology)	None	None	None	None	None	None	None	None	None	None	None	Spo_XS-dw_2.0	None	None	None	None	None	None	None	None	None	None	None	None	None	None	None	None	None	None	None	None	None	None
180.m00377	CNAG_05695	None	None	None	None	None	None	None	KOG1449	T	Predicted Rho GTPase-activating protein CdGAPr	glucosamine 6-phosphate N-acetyltransferase	None	None	None	None	None	None	None	None	None	None	None	None	None	None	None	None	None	None	None	None	None	None	None	None	None	None	None	None	None	None	None	None	None	None	None	None	None
180.m00451	CNAG_06603	YBR281C	DUG2	None	None	orf19.2455	None	None	KOG2276	E	Metalloexopeptidases	WD repeat-containing protein	Probable di- and tri-peptidase; forms a complex with Dug1p and Dug3p to degrade glutathione (GSH) and other peptides containing a gamma-glu-X bond in an alternative pathway to GSH degradation by gamma-glutamyl transpeptidase (Ecm38p)	None	None	None	None	None	None	None	None	None	None	None	None	None	None	None	None	None	None	None	None	None	None	None	None	None	None	None	None	None	None	None	None	None	None	None	None
180.m00452	CNAG_06606	None	None	None	None	None	None	None	KOG0393	R	Ras-related small GTPase, Rho type	rho small monomeric GTPase	None	None	None	None	None	None	None	None	None	None	None	None	None	None	None	None	None	None	None	None	None	None	None	None	None	None	None	None	None	None	None	None	None	None	None	None	None
180.m00465	CNAG_06530	None	None	None	None	None	None	None	KOG2741	GQ	Dimeric dihydrodiol dehydrogenase	conserved hypothetical protein	None	None	None	None	None	None	None	None	None	None	None	None	None	None	None	None	None	None	None	None	None	None	None	None	None	None	None	None	None	None	None	None	None	None	None	None	None
180.m00466	CNAG_06533	YCR011C	ADP1	None	None	orf19.459	None	None	KOG0061	Q	Transporter, ABC superfamily (Breast cancer resistance protein)	ATP-dependent permease	Putative ATP-dependent permease of the ABC transporter family of proteins	None	None	None	None	None	None	Sce_HS-up_2.0	None	None	None	None	None	None	None	None	None	None	None	None	None	None	None	None	None	None	None	None	None	None	None	None	None	None	None	None	None
180.m02938	CNAG_05795	None	None	SPBC713.05	None	None	None	None	KOG0316	S	Conserved WD40 repeat-containing protein	nuclear mRNA splicing protein	None	WD repeat protein, human MAPK organizer 1 (MORG1) family	None	None	None	None	None	None	None	None	None	None	None	None	None	None	None	None	None	None	None	None	None	None	None	None	None	None	None	None	None	None	None	None	None	None	None
180.m02970	CNAG_05876	None	None	None	None	None	None	None	None	None	None	conserved hypothetical protein	None	None	None	None	None	None	None	None	None	None	None	None	None	None	None	None	None	None	None	None	None	None	None	None	None	None	None	None	None	None	None	None	None	None	None	None	None
181.m07801	CNAG_00021	YOL052C	SPE2	SPBP4H10.05c	spe2	orf19.568	ca2712	SPE2	KOG0788	T	S-adenosylmethionine decarboxylase	adenosylmethionine decarboxylase	S-adenosylmethionine decarboxylase, required for the biosynthesis of spermidine and spermine; cells lacking Spe2p require spermine or spermidine for growth in the presence of oxygen but not when grown anaerobically	S-adenosylmethionine decarboxylase proenzyme Spe2	adenosylmethionine decarboxylase precurser(by homology)	None	None	None	None	None	None	None	None	None	None	None	None	None	None	None	None	None	None	None	None	Cal_HS-up	None	Cal_SSR.HS-up	None	None	None	None	None	None	Cal_XS-dw_1.5	None	None	None	None
181.m07803	CNAG_00023	None	None	SPBPB2B2.08	None	None	None	None	None	None	None	conserved hypothetical protein	None	conserved fungal protein	None	None	None	None	None	None	None	None	None	None	None	None	None	Spo_Cd-up_2.0	None	None	None	None	None	None	None	None	None	None	None	None	None	None	None	None	None	None	None	None	None
181.m07827	CNAG_00054	None	None	None	None	None	None	None	None	None	None	DUF1264 domain-containing protein	None	None	None	None	None	None	None	None	None	None	None	None	None	None	None	None	None	None	None	None	None	None	None	None	None	None	None	None	None	None	None	None	None	None	None	None	None
181.m07834	CNAG_00151	None	None	None	None	None	None	None	KOG0155	K	Transcription factor CA150	peptide-binding protein	None	None	None	None	None	None	None	None	None	None	None	None	None	None	None	None	None	None	None	None	None	None	None	None	None	None	None	None	None	None	None	None	None	None	None	None	None
181.m07860	CNAG_00091	None	None	None	None	None	None	None	KOG0845	YU	Nuclear pore complex, Nup98 component (sc Nup145/Nup100/Nup116)	conserved hypothetical protein	None	None	None	None	None	None	None	None	None	None	None	None	None	None	None	None	None	None	None	None	None	None	None	None	None	None	None	None	None	None	None	None	None	None	None	None	None
181.m07895	CNAG_00130	YLR248W	RCK2	SPCC1322.08	srk1	orf19.2268	ca1881	RCK2	KOG0032	T	Ca2+/calmodulin-dependent protein kinase, EF-Hand protein superfamily	CAMK/CAMK1 protein kinase	Protein kinase involved in the response to oxidative and osmotic stress; identified as suppressor of S. pombe cell cycle checkpoint mutations	MAPK-activated protein kinase Srk1	Ca/calmodulin-dependent ser/thr protein kinase (by homology)	None	None	None	None	Sce_HS-up_2.0	None	None	None	Spo_OS-up_2.0	None	Spo_XS-up_2.0	None	Spo_Cd-up_2.0	None	Spo_CESR-up	None	None	None	None	None	None	None	None	None	Cal_OS-up_1.5	None	None	None	None	None	None	None	None	None
181.m07930	CNAG_00165	YLR017W	MEU1	SPAC16C9.02c	None	orf19.6938	ca4708	MEU1	KOG3985	F	Methylthioadenosine phosphorylase MTAP	5'-methylthioadenosine phosphorylase	Methylthioadenosine phosphorylase (MTAP), catalyzes the initial step in the methionine salvage pathway; affects polyamine biosynthesis through regulation of ornithine decarboxylase (Spe1p) activity; regulates ADH2 gene expression	S-methyl-5-thioadenosine phosphorylase (predicted)	regulator of ADH2 expression (by homology)	None	None	None	Sce_XS-dw_2.0	None	Sce_HS-dw_2.0	None	None	None	None	None	Spo_XS-dw_2.0	None	Spo_Cd-dw_2.0	None	None	None	None	None	None	None	None	None	None	None	None	None	None	None	None	None	None	Cal_Cd-up_1.5	None
181.m07953	CNAG_00190	None	None	None	None	None	None	None	KOG0521	T	Putative GTPase activating proteins (GAPs)	conserved hypothetical protein	None	None	None	None	None	None	None	None	None	None	None	None	None	None	None	None	None	None	None	None	None	None	None	None	None	None	None	None	None	None	None	None	None	None	None	None	None
181.m07996	CNAG_00243	None	None	None	None	None	None	None	None	None	None	conserved hypothetical protein	None	None	None	None	None	None	None	None	None	None	None	None	None	None	None	None	None	None	None	None	None	None	None	None	None	None	None	None	None	None	None	None	None	None	None	None	None
181.m08000	CNAG_00248	YLR417W	VPS36	SPBC3B9.09	vps36	orf19.795	ca1469	IPF5078	KOG2760	U	Vacuolar sorting protein VPS36	conserved hypothetical protein	Component of the ESCRT-II complex; contains the GLUE (GRAM Like Ubiquitin binding in EAP45) domain which is involved in interactions with ESCRT-I and ubiquitin-dependent sorting of proteins into the endosome	RBZ zinc finger protein Vps36	unknown function	Sce_OS-up_2.0	None	None	None	None	None	None	None	None	None	None	None	None	None	None	None	None	None	None	None	None	None	None	None	None	None	None	None	None	None	None	None	None	None
181.m08005	CNAG_00256	YDR158W	HOM2	SPCC1827.06c	None	orf19.1559	ca3984	HOM2	KOG4777	E	Aspartate-semialdehyde dehydrogenase	aspartate-semialdehyde dehydrogenase	Aspartic beta semi-aldehyde dehydrogenase, catalyzes the second step in the common pathway for methionine and threonine biosynthesis; expression regulated by Gcn4p and the general control of amino acid synthesis	aspartate semialdehyde dehydrogenase	Aspartate-semialdehyde dehydrogenase (by homology)	None	None	None	None	None	None	None	None	None	None	None	None	None	None	None	None	None	None	None	None	None	None	None	None	None	None	None	None	None	None	None	None	Cal_Cd-up_1.5	None
181.m08013	CNAG_00261	None	None	None	None	None	None	None	KOG0939	OK	E3 ubiquitin-protein ligase/Putative upstream regulatory element binding protein	conserved hypothetical protein	None	None	None	None	None	None	None	None	None	None	None	None	None	None	None	None	None	None	None	None	None	None	None	None	None	None	None	None	None	None	None	None	None	None	None	None	None
181.m08015	CNAG_00264	None	None	None	None	None	None	None	None	None	None	nuclease I	None	None	None	None	None	None	None	None	None	None	None	None	None	None	None	None	None	None	None	None	None	None	None	None	None	None	None	None	None	None	None	None	None	None	None	None	None
181.m08021	CNAG_00271	YEL044W	IES6	SPAC222.04c	ies6	orf19.2889	ca3777	IPF10432	KOG4137	S	Uncharacterized conserved protein	nuclear protein	Protein that associates with the INO80 chromatin remodeling complex under low-salt conditions	chromatin remodeling complex associated protein Ies6 (predicted)	unknown function	None	None	None	None	None	Sce_HS-dw_2.0	None	None	None	None	None	None	None	None	None	None	None	None	None	None	None	None	None	None	None	None	None	None	None	None	None	None	None	None
181.m08030	CNAG_07114	YPL234C	TFP3	SPAC732.01	vma11	orf19.6538	ca4937	TFP3	KOG0232	C	Vacuolar H+-ATPase V0 sector, subunits c/c'	hypothetical protein	Vacuolar ATPase V0 domain subunit c', involved in proton transport activity; hydrophobic integral membrane protein (proteolipid) containing four transmembrane segments; N and C termini are in the vacuolar lumen	V-type ATPase proteolipid subunit	H+-ATPase by homology	None	None	None	None	None	None	None	None	None	None	None	None	None	None	None	None	None	None	None	None	None	None	None	None	None	None	None	None	None	None	None	None	None	None
181.m08037	CNAG_00290	None	None	None	None	None	None	None	KOG2195	OPR	Transferrin receptor and related proteins containing the protease-associated (PA) domain	aminopeptidase	None	None	None	None	None	None	None	None	None	None	None	None	None	None	None	None	None	None	None	None	None	None	None	None	None	None	None	None	None	None	None	None	None	None	None	None	None
181.m08041	CNAG_00294	None	None	None	None	None	None	None	KOG1996	A	mRNA splicing factor	conserved hypothetical protein	None	None	None	None	None	None	None	None	None	None	None	None	None	None	None	None	None	None	None	None	None	None	None	None	None	None	None	None	None	None	None	None	None	None	None	None	None
[truncated: 130 more rows]
[truncated: 16 more columns]

## Sheet: H99 CAN2 BCS 2 fold
Gene ID/ name									Biological function							Stress Response Genes of S. cerevisiae								Stress Response Genes of S. pombe								Stress Response Genes of C. albicans (Enjalbert et al., 2003)								Stress Response Genes of C. albicans (Enjalbert et al., 2006)
[truncated: 11 more rows]
[truncated: 16 more columns]

## Sheet: H99 CAN2 BCS 1.5 fold
Gene ID/ name									Biological function							Stress Response Genes of C. neoformans var. grubii H99								Gene expression
[truncated: 137 more rows]
